# Supplementary material for: Hippocampal and cortical tissue-specific epigenetic clocks indicate an increased epigenetic age in a mouse model for Alzheimer&#x2019;s disease
Source: publisher site journal article supplement (doi:10.18632/aging.104056), 2020-10-20
Supplement: Supplementary file [file aging-v12i20-104056-supplementary-material-SD1.pdf]

## SUPPLEMENTARY FIGURE

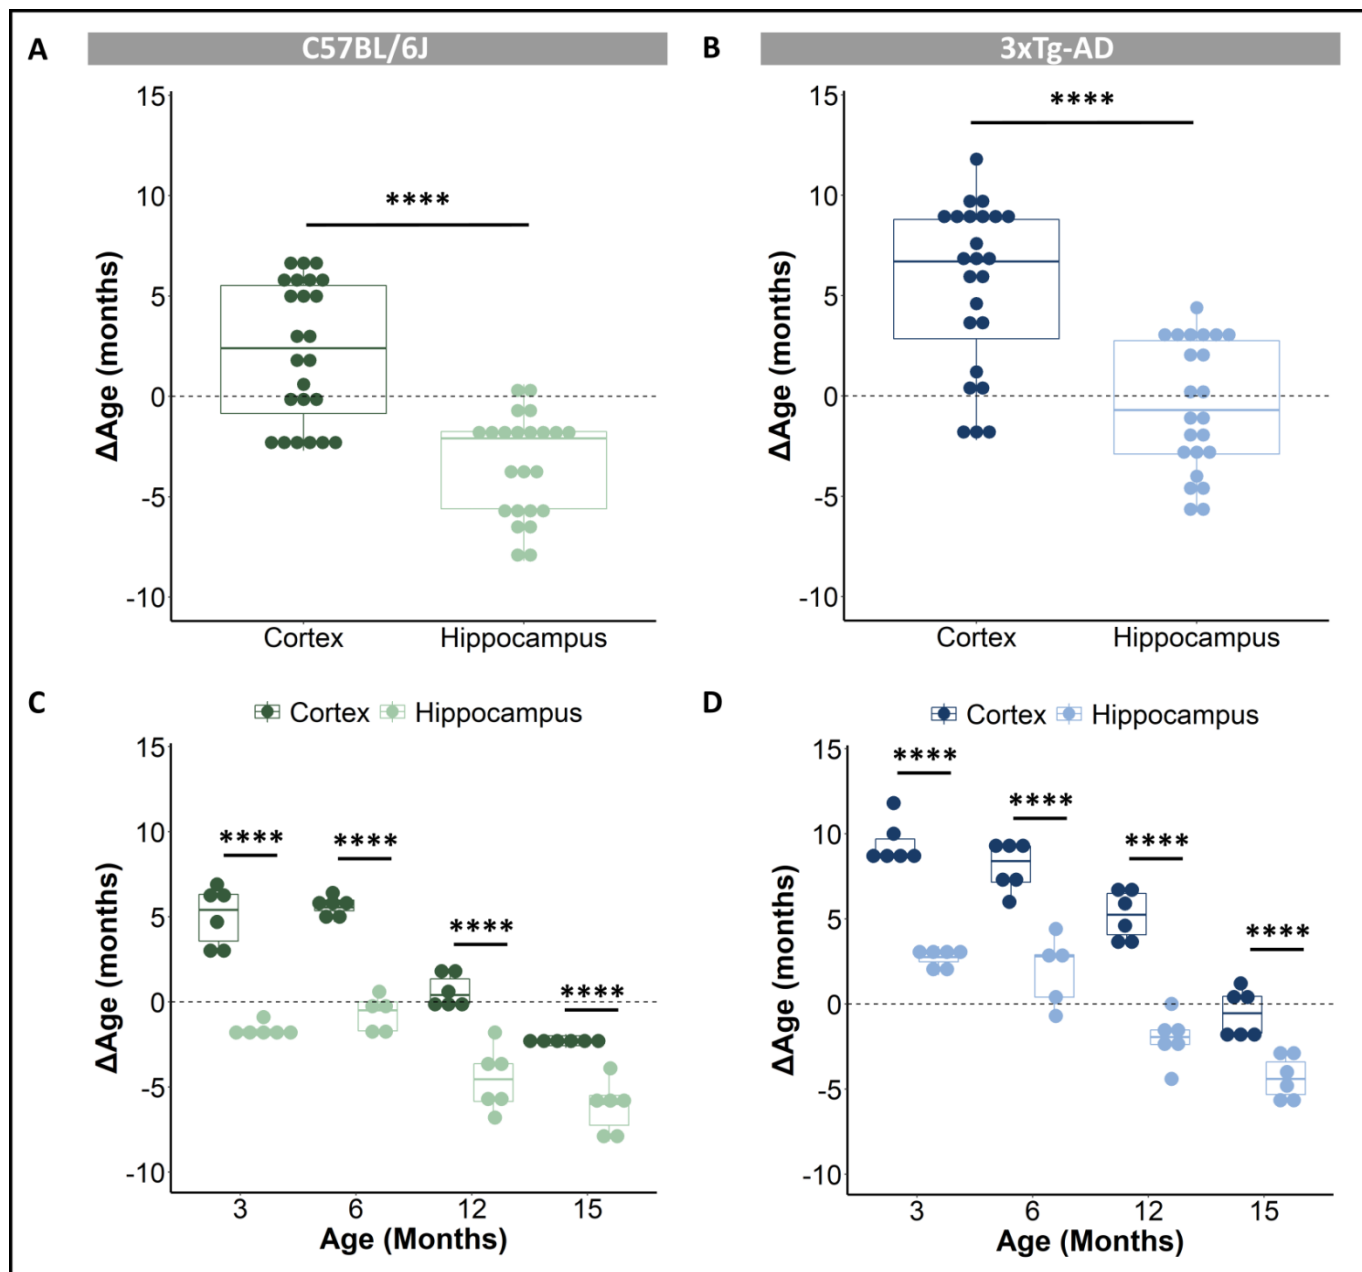

**Supplementary Figure 1. Acceleration of epigenetic age in cortex compared to hippocampus in C57BL/6J and 3xTg-AD mice.** (A, B) The mean  $\Delta$ Age and (C, D) the  $\Delta$ Age per chronological timepoint for cortex (dark) and hippocampus (light) of C57BL/6J and 3xTg-AD mice. N = 6. \*\*\*\* p < 0.0001.
