# Supplementary material for: Hippocampal and cortical tissue-specific epigenetic clocks indicate an increased epigenetic age in a mouse model for Alzheimer’s disease
Source: Aging (Albany NY). 2020 Oct 20;12(20):20817–34. doi: 10.18632/aging.104056 (PMC7655172; doi:10.18632/aging.104056)
Supplement: Supplementary Table 1 [file aging-12-104056-s002..xlsx]

## Sheet: CortexV1_1144CpGs
chromosome	position	strand
chr1	74027679	+
chr1	74027681	+
chr1	74027686	+
chr1	74027719	+
chr1	158251340	-
chr1	158251393	-
chr1	158251435	-
chr1	158251440	-
chr1	158251446	-
chr1	186240856	-
chr1	186240902	-
chr1	186240905	-
chr10	33624462	-
chr10	33624466	-
chr10	33624482	-
chr10	33624490	-
chr10	33624498	-
chr10	33624501	-
chr10	33624503	-
chr10	33624508	-
chr10	33624547	-
chr10	33624549	-
chr10	33624551	-
chr10	33624566	-
chr10	54755445	+
chr10	54755455	+
chr10	54755507	+
chr10	54755519	+
chr10	54755533	+
chr10	66921261	-
chr10	66921282	-
chr10	66921285	-
chr10	66921292	-
chr10	66921314	-
chr10	71344342	+
chr10	71344392	+
chr10	71344396	+
chr10	71344409	+
chr10	80003545	+
chr10	80003571	+
chr10	80003628	+
chr10	80200721	+
chr10	80200787	+
chr10	81431184	+
chr10	81431200	+
chr10	81431202	+
chr10	81431220	+
chr10	81431223	+
chr10	81431233	+
chr10	81431237	+
chr10	81431277	+
chr10	81431289	+
chr10	81433653	+
chr10	81433676	+
chr10	81433702	+
chr10	81433720	+
chr10	81433726	+
chr10	81433737	+
chr10	81433743	+
chr10	127326466	-
chr10	127326472	-
chr10	127326476	-
chr10	127326482	-
chr10	127326487	-
chr10	127326513	-
chr10	127326524	-
chr10	127326528	-
chr10	127326556	-
chr10	127326560	-
chr10	127326566	-
chr11	3160011	-
chr11	3160027	-
chr11	3160125	-
chr11	24233940	-
chr11	24233970	-
chr11	24234006	-
chr11	24234048	-
chr11	45980794	-
chr11	45980798	-
chr11	45980805	-
chr11	45980814	-
chr11	45980834	-
chr11	45980849	-
chr11	45980860	-
chr11	45980871	-
chr11	45980877	-
chr11	45980882	-
chr11	45980891	-
chr11	45980898	-
chr11	49978729	+
chr11	54961685	-
chr11	54961691	-
chr11	54961737	-
chr11	57832738	-
chr11	57832763	-
chr11	57832797	-
chr11	57832806	-
chr11	57832815	-
chr11	57832818	-
chr11	57832837	-
chr11	57832850	-
chr11	57832853	-
chr11	59284275	+
chr11	59284289	+
chr11	59284292	+
chr11	59284325	+
chr11	59284339	+
chr11	59284350	+
chr11	59284352	+
chr11	59284355	+
chr11	59284358	+
chr11	67667943	+
chr11	67667970	+
chr11	67667992	+
chr11	67668015	+
chr11	67668025	+
chr11	67668034	+
chr11	71751597	-
chr11	71751601	-
chr11	71751626	-
chr11	71751650	-
chr11	71751657	-
chr11	71751671	-
chr11	72411971	-
chr11	72411995	-
chr11	72412000	-
chr11	72412027	-
chr11	75895108	+
chr11	75895130	+
chr11	75895167	+
chr11	75895182	+
chr11	75895187	+
chr11	75895200	+
chr11	80209445	-
chr11	80209449	-
chr11	80209458	-
chr11	80209463	-
chr11	80209473	-
chr11	80209476	-
chr11	80209479	-
chr11	80209493	-
chr11	80209518	-
chr11	80209525	-
chr11	80209537	-
chr11	80209541	-
chr11	80209553	-
chr11	94500225	+
chr11	94500229	+
chr11	101165534	-
chr11	101165579	-
chr11	101165611	-
chr11	101165617	-
chr11	101165623	-
chr11	101165638	-
chr11	101165647	-
chr11	102606266	-
chr11	102606278	-
chr11	102606283	-
chr11	102606290	-
chr11	102606294	-
chr11	102606329	-
chr11	102606336	-
chr11	102606347	-
chr11	102606350	-
chr11	102606369	-
chr11	114639899	-
chr11	114639908	-
chr11	114639924	-
chr11	114639926	-
chr11	114639930	-
chr11	114639935	-
chr11	114639967	-
chr12	17993340	-
chr12	17993342	-
chr12	17993353	-
chr12	17993370	-
chr12	17993376	-
chr12	17993386	-
chr12	17993413	-
chr12	17993417	-
chr12	17993423	-
chr12	17993438	-
chr12	20197060	+
chr12	20197062	+
chr12	20197069	+
chr12	20197083	+
chr12	20197085	+
chr12	20197092	+
chr12	20197094	+
chr12	20197099	+
chr12	20197112	+
chr12	20197123	+
chr12	20197125	+
chr12	20197136	+
chr12	20197153	+
chr12	20197159	+
chr12	20197169	+
chr12	24251997	-
chr12	24252002	-
chr12	24252004	-
chr12	24252011	-
chr12	24252013	-
chr12	24252027	-
chr12	24252031	-
chr12	24252036	-
chr12	24252043	-
chr12	24252049	-
chr12	24252061	-
chr12	24252068	-
chr12	24252071	-
chr12	24252073	-
chr12	24252081	-
chr12	24252092	-
chr12	24252096	-
chr12	24252098	-
chr12	24252116	-
chr12	24252122	-
chr12	78749631	-
chr12	78749648	-
chr12	78749659	-
chr12	78749711	-
chr12	78749715	-
chr12	78749720	-
chr12	78749739	-
chr12	81686505	-
chr12	81686521	-
chr12	103214558	+
chr12	103214577	+
chr12	103214638	+
chr12	103214652	+
chr12	103214655	+
chr12	105884838	+
chr12	105884857	+
chr12	105884863	+
chr12	105884891	+
chr12	105884903	+
chr12	105884928	+
chr13	24862256	+
chr13	24862269	+
chr13	43559423	+
chr13	43559455	+
chr13	43559490	+
chr13	43559496	+
chr13	60687012	-
chr13	60687050	-
chr13	60687061	-
chr13	60687073	-
chr13	60687110	-
chr13	107680956	+
chr13	107680967	+
chr13	107680976	+
chr13	107846892	+
chr13	107846932	+
chr13	107846940	+
chr13	107846957	+
chr13	107846991	+
chr14	25456804	+
chr14	25456831	+
chr14	32599984	-
chr14	32600019	-
chr14	32600023	-
chr14	32600026	-
chr14	32600029	-
chr14	32600050	-
chr14	32600074	-
chr14	32600077	-
chr14	32600085	-
chr14	34602957	-
chr14	34603033	-
chr14	34603037	-
chr14	61689950	-
chr14	61689954	-
chr14	61689976	-
chr14	61689983	-
chr14	61689996	-
chr14	61689998	-
chr14	61690008	-
chr14	61690013	-
chr14	61690022	-
chr14	61690036	-
chr14	61690046	-
chr14	61690052	-
chr14	61690061	-
chr14	65759478	+
chr14	65759535	+
chr14	65759556	+
chr14	67072764	-
chr14	67072811	-
chr14	70079166	-
chr14	70079169	-
chr14	70079191	-
chr14	70079194	-
chr14	70079205	-
chr14	70079212	-
chr14	70079224	-
chr14	70079248	-
chr14	70079274	-
chr14	70079283	-
chr14	74978493	+
chr14	74978556	+
chr14	74978575	+
chr15	3996517	-
chr15	3996552	-
chr15	3996565	-
chr15	26309559	-
chr15	26309582	-
chr15	26309590	-
chr15	26309593	-
chr15	26309608	-
chr15	26309618	-
chr15	26309624	-
chr15	26309627	-
chr15	26309629	-
chr15	26309634	-
chr15	26309642	-
chr15	26309646	-
chr15	26309649	-
chr15	60822414	-
chr15	60822470	-
chr15	60822505	-
chr15	60822510	-
chr15	60822531	-
chr15	74751284	+
chr15	74751304	+
chr15	74751361	+
chr15	74751367	+
chr15	83527319	-
chr15	83527324	-
chr15	83527333	-
chr15	83527335	-
chr15	83527360	-
chr15	83527376	-
chr15	83527398	-
chr15	83527414	-
chr15	83527442	-
chr15	83846851	-
chr15	83846891	-
chr15	83846894	-
chr15	83846929	-
chr15	85326518	-
chr15	85326535	-
chr15	85326610	-
chr15	85538502	-
chr15	85538577	-
chr15	99199889	+
chr15	99199894	+
chr15	99199897	+
chr15	99199908	+
chr15	99199937	+
chr15	99199953	+
chr16	16303531	-
chr16	16303538	-
chr16	16303548	-
chr16	16303569	-
chr16	16303577	-
chr16	16303585	-
chr16	16303587	-
chr16	16303601	-
chr16	16303618	-
chr16	22572976	-
chr16	22572985	-
chr16	22572991	-
chr16	22573020	-
chr16	22573047	-
chr16	22573057	-
chr16	22573059	-
chr16	22573069	-
chr16	22573079	-
chr16	33382296	-
chr16	33382304	-
chr16	33382331	-
chr16	33382347	-
chr16	44825757	+
chr16	44825774	+
chr16	44825788	+
chr16	44825805	+
chr16	44825833	+
chr16	72678613	+
chr16	72678622	+
chr16	72678627	+
chr16	72678647	+
chr16	72678655	+
chr16	72678696	+
chr16	90087384	-
chr16	90087476	-
chr16	90087480	-
chr16	90087486	-
chr16	95861227	-
chr16	95861262	-
chr16	95861329	-
chr17	5401513	-
chr17	5401532	-
chr17	5401563	-
chr17	5401587	-
chr17	5401598	-
chr17	5401613	-
chr17	7158243	+
chr17	7158265	+
chr17	7158290	+
chr17	12507933	+
chr17	12507948	+
chr17	12507958	+
chr17	12508102	-
chr17	12508104	-
chr17	12508115	-
chr17	12508136	-
chr17	12508147	-
chr17	12508167	-
chr17	35703917	-
chr17	35703961	-
chr17	35703987	-
chr17	35704000	-
chr17	35704023	-
chr17	36083781	+
chr17	36083795	+
chr17	36083816	+
chr17	36083819	+
chr17	36083823	+
chr17	36083825	+
chr17	36083837	+
chr17	36083846	+
chr17	36083851	+
chr17	36083857	+
chr17	36083866	+
chr17	36083873	+
chr17	36083884	+
chr17	36083890	+
chr17	47138124	+
chr17	47138152	+
chr17	47138168	+
chr17	47926165	-
chr17	47926205	-
chr17	50192710	+
chr17	50192720	+
chr17	50192761	+
chr17	56099233	+
chr17	56099245	+
chr17	56099258	+
chr17	56099298	+
chr17	56099308	+
chr17	56099313	+
chr17	56099319	+
chr17	56099339	+
chr17	56829847	+
chr17	56829853	+
chr17	56829881	+
chr17	56829892	+
chr17	56829905	+
chr17	56829911	+
chr17	56829934	+
chr17	56829948	+
chr17	66417807	+
chr17	66417866	+
chr18	32430782	-
chr18	32430839	-
chr18	32430851	-
chr18	32430886	-
chr18	32430889	-
chr18	45590053	+
chr18	45590166	+
chr18	60750571	+
chr18	60750617	+
chr18	60750625	+
chr18	60750630	+
chr18	60750657	+
chr18	66022698	-
chr18	66022715	-
chr18	66022735	-
chr18	66022748	-
chr18	66022769	-
chr18	70582481	-
chr18	70582499	-
chr18	70582507	-
chr18	70582511	-
chr18	70582513	-
chr18	70582522	-
chr18	70582536	-
chr18	70582543	-
chr18	82902489	+
chr18	82902545	+
chr18	82902560	+
chr18	82902590	+
chr18	84719748	+
chr18	84719799	+
chr18	84719818	+
chr18	84719863	+
chr19	5783875	+
chr19	5783881	+
chr19	5783907	+
chr19	5783938	+
chr19	5783946	+
chr19	6830335	-
chr19	6830340	-
chr19	6830372	-
chr19	6830375	-
chr19	6830379	-
chr19	6830384	-
chr19	6830390	-
chr19	6830397	-
chr19	6830399	-
chr19	6830401	-
chr19	6830407	-
chr19	6830420	-
chr19	6830430	-
chr19	7040500	+
chr19	7040539	+
chr19	7040541	+
chr19	7040549	+
chr19	7040569	+
chr19	7040590	+
chr19	7040600	+
chr19	7040608	+
chr19	10720451	-
chr19	10720472	-
chr19	10720494	-
chr19	10720513	-
chr19	10720521	-
chr19	45741556	-
chr19	45741565	-
chr19	45741573	-
chr19	45741594	-
chr19	45741603	-
chr19	45741606	-
chr19	45741620	-
chr19	45816720	+
chr19	45816757	+
chr19	45816774	+
chr19	45816779	+
chr19	47265679	-
chr19	47265737	-
chr19	56548400	-
chr19	56548402	-
chr19	56548421	-
chr19	56548426	-
chr19	56548435	-
chr19	56548444	-
chr19	56548455	-
chr19	56548457	-
chr19	56548460	-
chr19	56548465	-
chr19	56548481	-
chr2	25579858	-
chr2	25579862	-
chr2	25579877	-
chr2	25579880	-
chr2	25579886	-
chr2	25579890	-
chr2	25579907	-
chr2	25579935	-
chr2	25579943	-
chr2	25579970	-
chr2	29250226	+
chr2	29250230	+
chr2	29250232	+
chr2	29250247	+
chr2	29250311	+
chr2	29250318	+
chr2	29845608	+
chr2	29845617	+
chr2	29845632	+
chr2	29845666	+
chr2	29845674	+
chr2	29845682	+
chr2	29845695	+
chr2	29845713	+
chr2	33216721	+
chr2	33216733	+
chr2	33216751	+
chr2	33216775	+
chr2	33216804	+
chr2	116066822	+
chr2	116066865	+
chr2	116066914	+
chr2	116066919	+
chr2	128436646	+
chr2	128436683	+
chr2	146959254	-
chr2	146959272	-
chr2	146959366	-
chr2	146959375	-
chr2	164168110	-
chr2	164168113	-
chr2	164168121	-
chr2	164168126	-
chr2	164168129	-
chr2	164168131	-
chr2	164168144	-
chr2	164168149	-
chr2	164168154	-
chr2	164168156	-
chr2	164168172	-
chr2	164168175	-
chr2	164168178	-
chr2	164168181	-
chr2	164168188	-
chr2	164168202	-
chr2	164678861	-
chr2	164678866	-
chr2	164678892	-
chr2	164678927	-
chr2	164678936	-
chr2	164678963	-
chr2	168893990	-
chr2	168894006	-
chr2	168894015	-
chr2	168894021	-
chr2	168894042	-
chr2	168894051	-
chr2	168894063	-
chr2	168894072	-
chr2	168894088	-
chr2	180702746	-
chr2	180702778	-
chr2	180702804	-
chr3	9159161	+
chr3	9159223	+
chr3	9159228	+
chr3	9159244	+
chr3	9159249	+
chr3	9159253	+
chr3	9159257	+
chr3	53477651	-
chr3	53477663	-
chr3	53477678	-
chr3	53477687	-
chr3	53477698	-
chr3	53477709	-
chr3	53477715	-
chr3	53477720	-
chr3	53477766	-
chr3	55782956	+
chr3	55782964	+
chr3	55782976	+
chr3	55782998	+
chr3	55783000	+
chr3	55783043	+
chr3	55783044	-
chr3	55783074	-
chr3	55783087	-
chr3	55783110	-
chr3	55783113	-
chr3	55783142	-
chr3	55783144	-
chr3	86547140	-
chr3	86547142	-
chr3	86547147	-
chr3	86547160	-
chr3	86547173	-
chr3	86547193	-
chr3	86547198	-
chr3	86547210	-
chr3	86547232	-
chr3	86547235	-
chr3	86547250	-
chr3	86547255	-
chr3	96219105	+
chr3	96219125	+
chr3	96219135	+
chr3	96219155	+
chr3	96219187	+
chr3	105052107	+
chr3	105052143	+
chr3	105052160	+
chr3	107758394	+
chr4	43382559	-
chr4	43382586	-
chr4	43382620	-
chr4	43382635	-
chr4	43382661	-
chr4	46345312	+
chr4	46345322	+
chr4	46345344	+
chr4	46345367	+
chr4	46345373	+
chr4	46345376	+
chr4	46345391	+
chr4	46345412	+
chr4	46345416	+
chr4	56740665	+
chr4	56740672	+
chr4	56740685	+
chr4	56740699	+
chr4	56740735	+
chr4	56740740	+
chr4	56740743	+
chr4	56740749	+
chr4	56740767	+
chr4	73790741	+
chr4	73790754	+
chr4	73790764	+
chr4	73790768	+
chr4	73790772	+
chr4	73790777	+
chr4	73790779	+
chr4	73790788	+
chr4	73790790	+
chr4	73790792	+
chr4	73790799	+
chr4	73790813	+
chr4	73790819	+
chr4	73790821	+
chr4	73790826	+
chr4	73790831	+
chr4	78212396	+
chr4	78212443	+
chr4	78212449	+
chr4	83284539	+
chr4	83284569	+
chr4	83284591	+
chr4	83284602	+
chr4	83284623	+
chr4	83284636	+
chr4	83284650	+
chr4	83284658	+
chr4	83284681	+
chr4	83284687	+
chr4	83284712	+
chr4	83284724	+
chr4	88640984	+
chr4	88641017	+
chr4	88641042	+
chr4	88641065	+
chr4	88641080	+
chr4	99653849	-
chr4	99653855	-
chr4	99653882	-
chr4	99653884	-
chr4	99653886	-
chr4	99653888	-
chr4	99653900	-
chr4	99653912	-
chr4	99653924	-
chr4	99653926	-
chr4	99653931	-
chr4	99653950	-
chr4	99653954	-
chr4	115978859	+
chr4	115978934	+
chr4	115978957	+
chr4	119415022	+
chr4	119415028	+
chr4	119415072	+
chr4	119415080	+
chr4	123202012	-
chr4	123202021	-
chr4	123202033	-
chr4	123202047	-
chr4	123202061	-
chr4	123202069	-
chr4	123202128	-
chr4	123202131	-
chr4	132532736	+
chr4	132532795	+
chr4	139581128	-
chr4	139581142	-
chr4	139581155	-
chr4	139581172	-
chr4	139581210	-
chr4	139581233	-
chr4	139581246	-
chr4	140750714	-
chr4	140750721	-
chr4	140750743	-
chr4	140750761	-
chr4	140750764	-
chr4	140750797	-
chr4	140750810	-
chr4	148317274	-
chr4	148317289	-
chr4	148317305	-
chr4	155654392	+
chr4	155654447	+
chr4	155654461	+
chr4	155654481	+
chr4	155654485	+
chr5	32737987	-
chr5	32738002	-
chr5	32738040	-
chr5	113164772	+
chr5	113164779	+
chr5	113164812	+
chr5	113164887	+
chr5	113164894	+
chr5	115479663	+
chr5	115479665	+
chr5	115479696	+
chr5	115479724	+
chr5	115479732	+
chr5	115479742	+
chr5	115479775	+
chr5	115479777	+
chr5	115479781	+
chr5	123141781	-
chr5	123141796	-
chr5	123141813	-
chr5	123141816	-
chr5	123141826	-
chr5	123141828	-
chr5	123141838	-
chr5	125270896	+
chr5	125270960	+
chr5	125271003	+
chr5	125391587	+
chr5	125391626	+
chr5	134946309	+
chr5	134946311	+
chr5	134946318	+
chr5	134946327	+
chr5	134946339	+
chr5	134946366	+
chr5	134946375	+
chr5	134946381	+
chr5	134946384	+
chr5	134946408	+
chr5	134946414	+
chr6	5297577	-
chr6	5297653	-
chr6	5297657	-
chr6	30958990	-
chr6	30959001	-
chr6	30959010	-
chr6	30959030	-
chr6	30959032	-
chr6	30959041	-
chr6	30959046	-
chr6	30959067	-
chr6	30959073	-
chr6	30959082	-
chr6	31218977	+
chr6	31218978	-
chr6	31219003	+
chr6	31219004	-
chr6	31219058	+
chr6	31219059	-
chr6	31219060	+
chr6	31219061	-
chr6	32564059	+
chr6	32564069	+
chr6	32564121	+
chr6	32564127	+
chr6	32564132	+
chr6	32564138	+
chr6	32564151	+
chr6	54289656	+
chr6	54289687	+
chr6	54289701	+
chr6	56875738	-
chr6	56875796	-
chr6	85186840	+
chr6	85186845	+
chr6	85186847	+
chr6	85186877	+
chr6	85186896	+
chr6	85186904	+
chr6	85186906	+
chr6	85186917	+
chr6	85186935	+
chr6	85186945	+
chr6	85186954	+
chr6	115499030	+
chr6	115499041	+
chr6	115499078	+
chr6	115499101	+
chr6	115499103	+
chr6	122609438	-
chr6	122609500	-
chr6	122609506	-
chr6	122609508	-
chr6	122609523	-
chr6	122609544	-
chr7	19489247	+
chr7	19489315	+
chr7	19698507	-
chr7	19698539	-
chr7	19698577	-
chr7	19698588	-
chr7	19698603	-
chr7	34647273	-
chr7	34647299	-
chr7	34647323	-
chr7	37365292	+
chr7	37365300	+
chr7	44959983	+
chr7	44959987	+
chr7	44959997	+
chr7	44960075	+
chr7	44960082	+
chr7	57509491	-
chr7	57509503	-
chr7	57509506	-
chr7	57509515	-
chr7	57509518	-
chr7	57509522	-
chr7	57509549	-
chr7	57509551	-
chr7	57509563	-
chr7	57509568	-
chr7	57509580	-
chr7	57509588	-
chr7	57509590	-
chr7	57509596	-
chr7	58837213	+
chr7	58837251	+
chr7	58837269	+
chr7	58837286	+
chr7	67562396	+
chr7	67562434	+
chr7	67562458	+
chr7	67562476	+
chr7	67562481	+
chr7	67562500	+
chr7	67562504	+
chr7	80876180	-
chr7	80876184	-
chr7	80876213	+
chr7	80876214	-
chr7	80876220	+
chr7	80876221	-
chr7	80876244	+
chr7	80876245	-
chr7	80876263	+
chr7	80876264	-
chr7	80876273	+
chr7	80876274	-
chr7	80876297	+
chr7	80876298	-
chr7	80876304	+
chr7	80876305	-
chr7	98870914	+
chr7	98870932	+
chr7	98870940	+
chr7	98871003	+
chr7	98871008	+
chr7	98871033	+
chr7	105554425	-
chr7	105554449	-
chr7	105554456	-
chr7	105554463	-
chr7	105554482	-
chr7	105554521	-
chr7	141269377	-
chr7	141269419	-
chr7	141269462	-
chr7	141269493	-
chr7	141269501	-
chr8	22566876	-
chr8	22566901	-
chr8	22566935	-
chr8	26976522	+
chr8	26976536	+
chr8	26976544	+
chr8	26976612	+
chr8	71591803	-
chr8	71591815	-
chr8	71591830	-
chr8	71591834	-
chr8	71591848	-
chr8	71591871	-
chr8	71591898	-
chr8	71591908	-
chr8	71591920	-
chr8	84745174	+
chr8	84745284	+
chr8	87660004	+
chr8	87660017	+
chr8	87660066	+
chr8	87660089	+
chr8	88664327	-
chr8	88664331	-
chr8	88664346	-
chr8	88664362	-
chr8	88664366	-
chr8	91872647	-
chr8	91872650	-
chr8	91872703	-
chr8	91872725	-
chr8	91872731	-
chr8	91872734	-
chr8	91872744	-
chr8	99416033	+
chr8	99416044	+
chr8	99416048	+
chr8	99416054	+
chr8	99416058	+
chr8	99416060	+
chr8	99416087	+
chr8	99416094	+
chr8	99416101	+
chr8	99416248	-
chr8	99416256	-
chr8	99416262	-
chr8	99416265	-
chr8	99416267	-
chr8	99416279	-
chr8	99416304	-
chr8	99416313	-
chr8	99416393	+
chr8	99416397	+
chr8	99416402	+
chr8	99416409	+
chr8	99416415	+
chr8	99416461	+
chr8	99416477	+
chr8	102783887	+
chr8	102783900	+
chr8	102783932	+
chr8	102783952	+
chr8	102783969	+
chr8	102783995	+
chr8	105298506	+
chr8	105298537	+
chr8	105298540	+
chr8	105298559	+
chr8	105298567	+
chr8	105298600	+
chr8	105298616	+
chr8	108714415	+
chr8	108714424	+
chr8	108714467	+
chr8	108714473	+
chr8	108714475	+
chr8	108714479	+
chr8	108714493	+
chr8	108886901	-
chr8	108886958	-
chr8	108886992	-
chr8	110168125	+
chr8	110168139	+
chr8	110168144	+
chr8	110168149	+
chr8	110168174	+
chr8	110168176	+
chr8	110168186	+
chr8	110168192	+
chr8	110168209	+
chr8	110168211	+
chr8	110168222	+
chr8	110168224	+
chr8	110168229	+
chr8	113688059	-
chr8	113688101	-
chr8	113688118	-
chr8	116144452	-
chr8	116144455	-
chr8	116144496	-
chr8	121223077	-
chr8	121223089	-
chr8	121223098	-
chr8	121223120	-
chr8	121223154	-
chr8	121223167	-
chr8	126422276	-
chr8	126422279	-
chr8	126422286	-
chr8	126422289	-
chr8	126422321	-
chr8	126422334	-
chr8	126422339	-
chr8	126422343	-
chr8	126422349	-
chr8	126422358	-
chr9	21792884	-
chr9	21792905	-
chr9	21792908	-
chr9	21792954	-
chr9	21792960	-
chr9	40685761	+
chr9	40685770	+
chr9	40685791	+
chr9	40685808	+
chr9	40685823	+
chr9	40685827	+
chr9	40685836	+
chr9	40685845	+
chr9	40685850	+
chr9	40685852	+
chr9	40685865	+
chr9	47531390	+
chr9	47531397	+
chr9	47531400	+
chr9	47531405	+
chr9	47531408	+
chr9	47531412	+
chr9	47531415	+
chr9	47531417	+
chr9	47531432	+
chr9	47531435	+
chr9	47531439	+
chr9	47531455	+
chr9	47531457	+
chr9	47531470	+
chr9	47531475	+
chr9	47531480	+
chr9	47531482	+
chr9	47531488	+
chr9	47531490	+
chr9	47531494	+
chr9	47531496	+
chr9	61877722	+
chr9	61877764	+
chr9	61877767	+
chr9	61877770	+
chr9	61877773	+
chr9	61877812	+
chr9	65631228	+
chr9	65631233	+
chr9	65631262	+
chr9	65631271	+
chr9	65631305	+
chr9	65631316	+
chr9	65631336	+
chr9	65631347	+
chr9	91364758	+
chr9	91364761	+
chr9	91364767	+
chr9	91364792	+
chr9	91364800	+
chr9	91364803	+
chr9	91364810	+
chr9	91364819	+
chr9	91364822	+
chr9	91364843	+
chr9	91364854	+
chr9	91364858	+
chr9	98952299	+
chr9	98952301	+
chr9	98952306	+
chr9	98952311	+
chr9	98952313	+
chr9	98952324	+
chr9	98952342	+
chr9	98952347	+
chr9	98952367	+
chr9	98952375	+
chr9	98952377	+
chr9	98952388	+
chr9	98952394	+
chr9	98952397	+
chr9	98952401	+
chr9	98952409	+
chr9	98952414	+
chr9	122587440	+
chr9	122587484	+
chr9	122587543	+

## Sheet: HippocmpsV1_732CpGs
Supplementary Table 1. A list of the specific CpG-sites used for the hippocampal and cortical clock.
chromosome	position	strand
chr1	16657134	-
chr1	16657141	-
chr1	16657157	-
chr1	16657172	-
chr1	16657175	-
chr1	16657220	-
chr1	16657236	-
chr1	73924842	+
chr1	73924863	+
chr1	73924899	+
chr1	73924919	+
chr1	75242907	-
chr1	75242947	-
chr1	75242960	-
chr1	75242988	-
chr1	137182659	-
chr1	137182663	-
chr1	137182669	-
chr1	137182680	-
chr10	80003545	+
chr10	80003571	+
chr10	80003628	+
chr10	81433653	+
chr10	81433676	+
chr10	81433702	+
chr10	81433720	+
chr10	81433726	+
chr10	81433737	+
chr10	81433743	+
chr10	81643243	+
chr10	81643291	+
chr10	81643298	+
chr10	81643315	+
chr10	81643331	+
chr10	81643336	+
chr10	81643360	+
chr10	118049418	+
chr10	118049447	+
chr10	118049530	+
chr10	118049534	+
chr10	118049538	+
chr11	3160011	-
chr11	3160027	-
chr11	3160125	-
chr11	33200958	-
chr11	33200990	-
chr11	33200999	-
chr11	33201007	-
chr11	33201013	-
chr11	33201018	-
chr11	33201026	-
chr11	54961685	-
chr11	54961691	-
chr11	54961737	-
chr11	57832738	-
chr11	57832763	-
chr11	57832797	-
chr11	57832806	-
chr11	57832815	-
chr11	57832818	-
chr11	57832837	-
chr11	57832850	-
chr11	57832853	-
chr11	72411971	-
chr11	72411995	-
chr11	72412000	-
chr11	72412027	-
chr11	80209445	-
chr11	80209449	-
chr11	80209458	-
chr11	80209463	-
chr11	80209473	-
chr11	80209476	-
chr11	80209479	-
chr11	80209493	-
chr11	80209518	-
chr11	80209525	-
chr11	80209537	-
chr11	80209541	-
chr11	80209553	-
chr11	97626436	-
chr11	97626441	-
chr11	97626484	-
chr11	97626515	-
chr11	97626528	-
chr11	97626959	-
chr11	97626977	-
chr11	97626983	-
chr11	97627018	-
chr11	97627074	-
chr11	98837513	+
chr11	98837526	+
chr11	98837551	+
chr11	98837554	+
chr11	98837590	+
chr11	98837596	+
chr11	98837600	+
chr11	98837621	+
chr11	98837633	+
chr11	102606266	-
chr11	102606278	-
chr11	102606283	-
chr11	102606290	-
chr11	102606294	-
chr11	102606329	-
chr11	102606336	-
chr11	102606347	-
chr11	102606350	-
chr11	102606369	-
chr12	69196873	-
chr12	69196884	-
chr12	69196893	-
chr12	69196905	-
chr12	69196911	-
chr12	69196914	-
chr12	69196918	-
chr12	69196943	-
chr12	69196968	-
chr12	86307774	-
chr12	86307799	-
chr12	86307828	-
chr12	86307870	-
chr12	86307880	-
chr12	111028824	+
chr12	111028833	+
chr12	111028856	+
chr12	111028882	+
chr12	111442864	+
chr12	111442893	+
chr12	111442902	+
chr12	111442904	+
chr12	111442906	+
chr12	111442911	+
chr12	111442960	+
chr13	55450673	+
chr13	55450774	+
chr13	97070967	+
chr13	97071006	+
chr13	97071017	+
chr13	97071038	+
chr13	97071053	+
chr13	97071061	+
chr13	97071063	+
chr14	25456804	+
chr14	25456831	+
chr14	31641037	+
chr14	31641051	+
chr14	31641076	+
chr14	31641083	+
chr14	31641099	+
chr14	31641104	+
chr14	31641109	+
chr14	31641116	+
chr14	31641118	+
chr14	31641127	+
chr14	34602957	-
chr14	34603033	-
chr14	34603037	-
chr15	74751284	+
chr15	74751304	+
chr15	74751361	+
chr15	74751367	+
chr15	83846851	-
chr15	83846891	-
chr15	83846894	-
chr15	83846929	-
chr15	84756607	+
chr15	84756643	+
chr15	84756677	+
chr15	84756679	+
chr15	84756688	+
chr15	84756703	+
chr15	84756707	+
chr15	85538502	-
chr15	85538577	-
chr15	85685523	+
chr15	85709609	-
chr15	85709632	-
chr15	85709676	-
chr15	98780482	+
chr15	98780491	+
chr15	98780510	+
chr15	98780539	+
chr15	98780554	+
chr15	99199889	+
chr15	99199894	+
chr15	99199897	+
chr15	99199908	+
chr15	99199937	+
chr15	99199953	+
chr16	13448545	+
chr16	13448556	+
chr16	13448569	+
chr16	13448582	+
chr16	13448587	+
chr16	13448595	+
chr16	13448607	+
chr16	13448609	+
chr16	22572976	-
chr16	22572985	-
chr16	22572991	-
chr16	22573020	-
chr16	22573047	-
chr16	22573057	-
chr16	22573059	-
chr16	22573069	-
chr16	22573079	-
chr16	33382296	-
chr16	33382304	-
chr16	33382331	-
chr16	33382347	-
chr16	44825757	+
chr16	44825774	+
chr16	44825788	+
chr16	44825805	+
chr16	44825833	+
chr16	72678613	+
chr16	72678622	+
chr16	72678627	+
chr16	72678647	+
chr16	72678655	+
chr16	72678696	+
chr16	95861227	-
chr16	95861262	-
chr16	95861329	-
chr17	35703917	-
chr17	35703961	-
chr17	35703987	-
chr17	35704000	-
chr17	35704023	-
chr17	36083781	+
chr17	36083795	+
chr17	36083816	+
chr17	36083819	+
chr17	36083823	+
chr17	36083825	+
chr17	36083837	+
chr17	36083846	+
chr17	36083851	+
chr17	36083857	+
chr17	36083866	+
chr17	36083873	+
chr17	36083884	+
chr17	36083890	+
chr17	45601555	+
chr17	45601558	+
chr17	45601567	+
chr17	45601570	+
chr17	45601594	+
chr17	45601603	+
chr17	45601624	+
chr17	45601635	+
chr17	45601639	+
chr17	45601650	+
chr17	45601664	+
chr17	56099233	+
chr17	56099245	+
chr17	56099258	+
chr17	56099298	+
chr17	56099308	+
chr17	56099313	+
chr17	56099319	+
chr17	56099339	+
chr17	66417807	+
chr17	66417866	+
chr18	32430782	-
chr18	32430839	-
chr18	32430851	-
chr18	32430886	-
chr18	32430889	-
chr18	45590053	+
chr18	45590166	+
chr18	66022698	-
chr18	66022715	-
chr18	66022735	-
chr18	66022748	-
chr18	66022769	-
chr19	7040500	+
chr19	7040539	+
chr19	7040541	+
chr19	7040549	+
chr19	7040569	+
chr19	7040590	+
chr19	7040600	+
chr19	7040608	+
chr19	10720451	-
chr19	10720472	-
chr19	10720494	-
chr19	10720513	-
chr19	10720521	-
chr19	34746529	+
chr19	34746562	+
chr19	34746571	+
chr19	34746607	+
chr19	34746645	+
chr19	45741556	-
chr19	45741565	-
chr19	45741573	-
chr19	45741594	-
chr19	45741603	-
chr19	45741606	-
chr19	45741620	-
chr19	56548400	-
chr19	56548402	-
chr19	56548421	-
chr19	56548426	-
chr19	56548435	-
chr19	56548444	-
chr19	56548455	-
chr19	56548457	-
chr19	56548460	-
chr19	56548465	-
chr19	56548481	-
chr2	18800565	+
chr2	18800576	+
chr2	18800579	+
chr2	18800584	+
chr2	18800615	+
chr2	18800624	+
chr2	18800635	+
chr2	25579858	-
chr2	25579862	-
chr2	25579877	-
chr2	25579880	-
chr2	25579886	-
chr2	25579890	-
chr2	25579907	-
chr2	25579935	-
chr2	25579943	-
chr2	25579970	-
chr2	30798718	+
chr2	30798739	+
chr2	30798750	+
chr2	30798754	+
chr2	30798763	+
chr2	30798775	+
chr2	30798785	+
chr2	30798801	+
chr2	30798810	+
chr2	30798819	+
chr2	33216721	+
chr2	33216733	+
chr2	33216751	+
chr2	33216775	+
chr2	33216804	+
chr2	74655750	+
chr2	74655753	+
chr2	74655758	+
chr2	74655767	+
chr2	74655770	+
chr2	74655773	+
chr2	74655779	+
chr2	74655782	+
chr2	74655791	+
chr2	74655794	+
chr2	74655799	+
chr2	74655810	+
chr2	74655816	+
chr2	74655824	+
chr2	74655827	+
chr2	74655831	+
chr2	74655834	+
chr2	74655837	+
chr2	146959254	-
chr2	146959272	-
chr2	146959366	-
chr2	146959375	-
chr3	55782956	+
chr3	55782964	+
chr3	55782976	+
chr3	55782998	+
chr3	55783000	+
chr3	55783043	+
chr3	55783044	-
chr3	55783074	-
chr3	55783087	-
chr3	55783110	-
chr3	55783113	-
chr3	55783142	-
chr3	55783144	-
chr4	46345312	+
chr4	46345322	+
chr4	46345344	+
chr4	46345367	+
chr4	46345373	+
chr4	46345376	+
chr4	46345391	+
chr4	46345412	+
chr4	46345416	+
chr4	78212396	+
chr4	78212443	+
chr4	78212449	+
chr4	83284539	+
chr4	83284569	+
chr4	83284591	+
chr4	83284602	+
chr4	83284623	+
chr4	83284636	+
chr4	83284650	+
chr4	83284658	+
chr4	83284681	+
chr4	83284687	+
chr4	83284712	+
chr4	83284724	+
chr4	88640984	+
chr4	88641017	+
chr4	88641042	+
chr4	88641065	+
chr4	88641080	+
chr4	99653849	-
chr4	99653855	-
chr4	99653882	-
chr4	99653884	-
chr4	99653886	-
chr4	99653888	-
chr4	99653900	-
chr4	99653912	-
chr4	99653924	-
chr4	99653926	-
chr4	99653931	-
chr4	99653950	-
chr4	99653954	-
chr4	115978859	+
chr4	115978934	+
chr4	115978957	+
chr4	119415022	+
chr4	119415028	+
chr4	119415072	+
chr4	119415080	+
chr4	132532736	+
chr4	132532795	+
chr4	139581128	-
chr4	139581142	-
chr4	139581155	-
chr4	139581172	-
chr4	139581210	-
chr4	139581233	-
chr4	139581246	-
chr4	140002521	+
chr4	140002573	+
chr4	140002596	+
chr4	140002603	+
chr4	140002620	+
chr4	140002630	+
chr4	140750714	-
chr4	140750721	-
chr4	140750743	-
chr4	140750761	-
chr4	140750764	-
chr4	140750797	-
chr4	140750810	-
chr4	148317274	-
chr4	148317289	-
chr4	148317305	-
chr4	155654392	+
chr4	155654447	+
chr4	155654461	+
chr4	155654481	+
chr4	155654485	+
chr5	24552732	-
chr5	24552739	-
chr5	24552751	-
chr5	32737987	-
chr5	32738002	-
chr5	32738040	-
chr5	115479663	+
chr5	115479665	+
chr5	115479696	+
chr5	115479724	+
chr5	115479732	+
chr5	115479742	+
chr5	115479775	+
chr5	115479777	+
chr5	115479781	+
chr5	123141781	-
chr5	123141796	-
chr5	123141813	-
chr5	123141816	-
chr5	123141826	-
chr5	123141828	-
chr5	123141838	-
chr5	146461630	+
chr5	146461659	+
chr5	146461670	+
chr5	146461717	+
chr5	146461729	+
chr5	146461779	+
chr5	146461855	+
chr5	146461859	+
chr6	30958990	-
chr6	30959001	-
chr6	30959010	-
chr6	30959030	-
chr6	30959032	-
chr6	30959041	-
chr6	30959046	-
chr6	30959067	-
chr6	30959073	-
chr6	30959082	-
chr6	31218977	+
chr6	31218978	-
chr6	31219003	+
chr6	31219004	-
chr6	31219058	+
chr6	31219059	-
chr6	31219060	+
chr6	31219061	-
chr6	54289656	+
chr6	54289687	+
chr6	54289701	+
chr6	85186840	+
chr6	85186845	+
chr6	85186847	+
chr6	85186877	+
chr6	85186896	+
chr6	85186904	+
chr6	85186906	+
chr6	85186917	+
chr6	85186935	+
chr6	85186945	+
chr6	85186954	+
chr6	88190216	-
chr6	88190220	-
chr6	88190243	-
chr6	88190252	-
chr6	88190262	-
chr6	91942351	-
chr6	91942378	-
chr6	91942419	-
chr6	91942435	-
chr6	91942453	-
chr7	19303711	+
chr7	19303730	+
chr7	19303777	+
chr7	19303784	+
chr7	19303787	+
chr7	19303801	+
chr7	25133079	+
chr7	25133123	+
chr7	25133175	+
chr7	25133177	+
chr7	25133185	+
chr7	30973341	-
chr7	30973356	-
chr7	30973364	-
chr7	30973379	-
chr7	30973382	-
chr7	30973384	-
chr7	30973386	-
chr7	30973416	-
chr7	30973424	-
chr7	30973436	-
chr7	44959983	+
chr7	44959987	+
chr7	44959997	+
chr7	44960075	+
chr7	44960082	+
chr7	73392861	-
chr7	73392895	-
chr7	98870914	+
chr7	98870932	+
chr7	98870940	+
chr7	98871003	+
chr7	98871008	+
chr7	98871033	+
chr7	101999247	+
chr7	101999274	+
chr7	101999292	+
chr7	101999298	+
chr7	101999334	+
chr7	101999352	+
chr7	105554425	-
chr7	105554449	-
chr7	105554456	-
chr7	105554463	-
chr7	105554482	-
chr7	105554521	-
chr7	133776081	+
chr7	133776124	+
chr7	133776159	+
chr7	133776161	+
chr7	133776170	+
chr7	133776176	+
chr8	105270964	+
chr8	105270994	+
chr8	105270995	-
chr8	105270999	+
chr8	105271000	-
chr8	105271004	+
chr8	105271005	-
chr8	105271014	+
chr8	105271015	-
chr8	105271020	+
chr8	105271021	-
chr8	105271024	+
chr8	105271025	-
chr8	105271038	+
chr8	105271039	-
chr8	105271085	-
chr8	105271093	-
chr8	105298506	+
chr8	105298537	+
chr8	105298540	+
chr8	105298559	+
chr8	105298567	+
chr8	105298600	+
chr8	105298616	+
chr8	106870067	+
chr8	106870079	+
chr8	106870088	+
chr8	106870108	+
chr8	106870113	+
chr8	106870142	+
chr8	106870159	+
chr8	108714415	+
chr8	108714424	+
chr8	108714467	+
chr8	108714473	+
chr8	108714475	+
chr8	108714479	+
chr8	108714493	+
chr8	108886901	-
chr8	108886958	-
chr8	108886992	-
chr8	113688059	-
chr8	113688101	-
chr8	113688118	-
chr8	125669913	+
chr8	125669914	-
chr8	125669926	+
chr8	125669927	-
chr8	125669937	+
chr8	125669938	-
chr8	125669945	+
chr8	125669946	-
chr8	125669948	+
chr8	125669949	-
chr8	125669952	+
chr8	125669953	-
chr8	125669955	+
chr8	125669956	-
chr8	125669957	+
chr8	125669958	-
chr8	125669963	+
chr8	125669964	-
chr8	125669972	+
chr8	125669973	-
chr8	125669977	+
chr8	125669978	-
chr8	125669993	+
chr8	125669994	-
chr8	125669996	+
chr8	125669997	-
chr8	125670003	+
chr8	125670004	-
chr8	125670011	+
chr8	125670012	-
chr8	125670014	+
chr8	125670015	-
chr8	125670018	+
chr8	125670019	-
chr8	126422276	-
chr8	126422279	-
chr8	126422286	-
chr8	126422289	-
chr8	126422321	-
chr8	126422334	-
chr8	126422339	-
chr8	126422343	-
chr8	126422349	-
chr8	126422358	-
chr9	47531390	+
chr9	47531397	+
chr9	47531400	+
chr9	47531405	+
chr9	47531408	+
chr9	47531412	+
chr9	47531415	+
chr9	47531417	+
chr9	47531432	+
chr9	47531435	+
chr9	47531439	+
chr9	47531455	+
chr9	47531457	+
chr9	47531470	+
chr9	47531475	+
chr9	47531480	+
chr9	47531482	+
chr9	47531488	+
chr9	47531490	+
chr9	47531494	+
chr9	47531496	+
chr9	65631228	+
chr9	65631233	+
chr9	65631262	+
chr9	65631271	+
chr9	65631305	+
chr9	65631316	+
chr9	65631336	+
chr9	65631347	+
chr9	91364758	+
chr9	91364761	+
chr9	91364767	+
chr9	91364792	+
chr9	91364800	+
chr9	91364803	+
chr9	91364810	+
chr9	91364819	+
chr9	91364822	+
chr9	91364843	+
chr9	91364854	+
chr9	91364858	+
chr9	98952299	+
chr9	98952301	+
chr9	98952306	+
chr9	98952311	+
chr9	98952313	+
chr9	98952324	+
chr9	98952342	+
chr9	98952347	+
chr9	98952367	+
chr9	98952375	+
chr9	98952377	+
chr9	98952388	+
chr9	98952394	+
chr9	98952397	+
chr9	98952401	+
chr9	98952409	+
chr9	98952414	+
chr9	122587440	+
chr9	122587484	+
chr9	122587543	+
