# Supplementary material for: Hippocampal and cortical tissue-specific epigenetic clocks indicate an increased epigenetic age in a mouse model for Alzheimer’s disease
Source: Aging (Albany NY). 2020 Oct 20;12(20):20817–34. doi: 10.18632/aging.104056 (PMC7655172; doi:10.18632/aging.104056)
Supplement: Supplementary Table 2 [file aging-12-104056-s003..xlsx]

## Sheet: Sheet1
Supplementary Table 2. DNA methylation levels of 2,031 CpG-sites used to train the DNAge® algorithm for hippocampus and cortex of 3, 6, 12 and 15 month old C57BL/6J and 3xTg-AD mice.
CpG	chrom	position	strand	ZR2068-1	ZR2068-2	ZR2068-4	ZR2068-5	ZR2068-6	ZR2068-7	ZR2068-8	ZR2068-9	ZR2068-10	ZR2068-11	ZR2068-12	ZR2068-13	ZR2068-14	ZR2068-15	ZR2068-16	ZR2068-17	ZR2068-18	ZR2068-19	ZR2068-20	ZR2280-1	ZR2280-2	ZR2280-3	ZR2280-4	ZR2280-5	ZR2280-6	ZR2280-7	ZR2280-8	ZR2280-9	ZR2280-10	ZR2280-11	ZR2280-12	ZR2280-25	ZR2280-26	ZR2280-27	ZR2280-28	ZR2280-29	ZR2280-30	ZR2280-31	ZR2280-32	ZR2280-33	ZR2280-34	ZR2280-35	ZR2280-36	ZR2280-37	ZR2280-38	ZR2280-39
				C57Bl6	C57Bl6	C57Bl6	C57Bl6	C57Bl6	C57Bl6	C57Bl6	C57Bl6	C57Bl6	C57Bl6	C57Bl6	3xTg-AD	3xTg-AD	3xTg-AD	3xTg-AD	3xTg-AD	3xTg-AD	3xTg-AD	3xTg-AD	C57Bl6	C57Bl6	C57Bl6	C57Bl6	C57Bl6	C57Bl6	C57Bl6	C57Bl6	C57Bl6	C57Bl6	C57Bl6	C57Bl6	3xTg-AD	3xTg-AD	3xTg-AD	3xTg-AD	3xTg-AD	3xTg-AD	3xTg-AD	3xTg-AD	3xTg-AD	3xTg-AD	3xTg-AD	3xTg-AD	3xTg-AD	3xTg-AD	3xTg-AD
				hippocampus	cortex	cortex	hippocampus	cortex	hippocampus	cortex	hippocampus	cortex	hippocampus	cortex	hippocampus	cortex	hippocampus	cortex	hippocampus	cortex	hippocampus	cortex	Cortex	Cortex	Cortex	Cortex	Cortex	Cortex	Hippocampus	Hippocampus	Hippocampus	Hippocampus	Hippocampus	Hippocampus	Cortex	Cortex	Cortex	Hippocampus	Hippocampus	Hippocampus	Cortex	Cortex	Cortex	Cortex	Cortex	Cortex	Hippocampus	Hippocampus	Hippocampus
				6 months	6 months	6 months	6 months	6 months	12 months	12 months	12 months	12 months	12 months	12 months	6 months	6 months	6 months	6 months	6 months	6 months	12 months	12 months	3 months	3 months	3 months	3 months	3 months	3 months	3 months	3 months	3 months	3 months	3 months	3 months	6 months	6 months	6 months	6 months	6 months	6 months	15 months	15 months	15 months	15 months	15 months	15 months	15 months	15 months	15 months
CpG_1	chr1	16657134	-	0.00866519	0.0057241	0.00276596	0.000262123	0.00934066	0.000287274	0.00056444	0.00295983	0.00669985	0.0105292	0.000634921	0.0038961	0.00064697	0	0.00639854	0.00590297	0.000486618	0.00248756	0.00589072	0.00433317	0.00386664	0.00456371	0.00243861	0.000192086	0.00389307	0.00437884	0.00320159	0.00524278	0.00171769	0.0029689	0.00185921	0.00338651	0.00173992	0.00137333	0	0	0.000286862	0.0023355	0.00270047	0.00354219	0.00188127	0.0100778	0.000619195	0.000240154	0.000155376	0.000554362
CpG_2	chr1	16657141	-	0.00463306	0.00114811	0.00724175	0.00446781	0.00523272	0.002	0.0039548	0.00675533	0.00592621	0.00485961	0.00731087	0.01028	0.00950529	0	0.0081874	0.00349779	0.00146461	0.00567678	0.00366002	0.00615858	0.0027409	0.00445536	0.00808217	0	0.00533507	0.00387515	0.00232455	0.0019573	0.00251302	0.00273002	0.00127975	0.00548707	0.00249546	0.000865863	0	0	0.000286779	0.00649417	0.00269663	0.00117795	0.00730613	0.000352485	0.000618047	0	0.000154847	0.00553327
CpG_3	chr1	16657157	-	0.00056243	0.00145433	0.00734976	0.000535906	0.00223589	0.00554583	0.014551	0.00410456	0.00842972	0.0175292	0.00354153	0	0.00509075	0	0.0125523	0.00531309	0.0114295	0.00490018	0.00268706	0.00503953	0.00139921	0.00666914	0.00449866	0.0250388	0.0039672	0.004602	0.00868486	0.00345057	0.00361573	0.00407117	0.0026023	0.0032268	0.00707203	0.00412888	0	0	0	0.000103338	0.00198307	0.00554707	0.00244499	0.0116174	0	0	0	0.0095124
CpG_4	chr1	16657172	-	0.000276396	0.0038588	0.00234142	0.00432447	0.00673077	0.00143369	0.00263778	0.00327315	0.00259291	0.00310391	0.00254089	0.0030349	0.00432246	0	0.00614824	0.00368732	0.00114034	0.00346451	0.00336083	0.00685163	0.00322608	0.00264068	0.0043681	9.56572e-05	6.46412e-05	0.0076118	0.00616638	0.00356041	0.00272763	0.000110914	0.00425804	0.00146672	0.0044211	0.00562608	0	0	0.0106124	0.00533211	0.00497475	0.00577127	0.00219241	0	0.000928793	0.000119861	0.00596344	0.0048396
CpG_5	chr1	16657175	-	0.00195113	0.00806219	0.00965769	0.000659718	0	0.000430849	0.000190621	0.00254453	0.00669856	0.00732999	0.00447284	0.00336007	0	0.00125628	0.000683917	0.00498799	0.00309976	0.00106544	0.00580507	0.0042326	0.000642674	0.00291971	0.00442422	0.000382263	0.00325521	0.0036977	0.00148588	0.00128121	0.00306251	0.0026178	0.00621795	0.00218794	0.000491363	0.00260501	0	0	0.000286533	0.00147463	0.00183617	0.00423812	0.00145871	8.80437e-05	0.000308833	0.000718477	0.000154871	0.00389736
CpG_6	chr1	16657220	-	0.00185082	0.00573723	0.000426894	0.0023554	0.00411523	0.0017138	0.0100151	0.00275599	0.00248661	0.00620615	0.00444586	0.00498807	0.00280656	0	0.00614195	0.0104953	0.000325521	0.00389174	0.00712106	0.00499424	0.00436121	0.00408719	0.00655738	0.000191058	0.000258231	0.00401522	0.00407444	0.0045654	0.00134581	0.00463918	0.00165922	0.00323357	0.00671749	0.00237393	0	0	0	0.00253011	0.00313269	0.00352692	0.000103972	0.00211082	0	0	0.00912465	0.000895502
CpG_7	chr1	16657236	-	0.00827815	0.00344234	0.00254994	0.00392567	0.00301866	0.00487805	0.00470367	0.000211954	0.00440191	0.00648123	0.00412437	0.00043262	0.00692341	0	0	0.0040568	0.00194679	0.00621449	0.00305064	0.00230459	0.00574122	0.00181835	0.00410936	0.000191058	0.00532883	0.00521053	0.00901396	0.0026105	0.00183554	0.00095722	0.00262266	0.003156	0.00317532	0.00273342	0	0.00195695	0.0203147	0.00415022	0.00478147	0.000626566	0.000208355	0.000175932	0.00123533	0	0.000463965	0.00371926
CpG_8	chr1	32172746	-	0.0101877	0.00912281	0.0026441	0.00339905	0.000710227	0.00149589	0.00569358	0.00460564	0	0.00261097	0.00513196	0.00343643	0.00506187	0	0.000682128	0.00565771	0.00417711	0.00156067	0.00493583	0.00480344	0.0058534	0.00323154	0.00241685	0.0121521	0.00858369	0.004177	0.00497912	0.0030541	0.00302572	0.00425184	0.00294272	0.00193966	0.00725251	0.00224751	0.00684932	0	0.00197239	0.0037679	0.00380384	0.00570534	0.00695249	0.0178174	0	0.000680272	0.0154849	0.00217951
CpG_9	chr1	32172750	-	0.00267523	0.00280702	0.00370566	0.00475867	0	0.00449438	0.00621762	0	0.00448179	0.00522534	0.00586941	0.00628212	0.00112676	0	0.00953029	0.0113101	0.000417188	0.00351425	0.000492854	0.00201969	0.00479297	0.00404989	0.00252467	0	0.0042943	0.00610945	0.0077158	0.004363	0.00637838	0.00260884	0.00346857	0.00592609	0.00506818	0.00308859	0	0	0.000492854	0.00406259	0.00648148	0.00726744	0.013905	0	0.0189702	0.0217539	0.000407166	0.00733472
CpG_10	chr1	32172766	-	0.00779151	0.00211491	0.00317712	0.00102145	0.00106952	0.00374813	0.00338277	0.00231548	0.00279564	0.00784057	0.00220103	0.00399772	0.00479819	0	0.00170184	0.00634995	0.00626043	0.00116936	0.00296443	0.00290477	0.00193591	0.00486105	0.00287604	0.000589159	0.000287026	0.00169414	0.0016896	0.0030076	0.00264994	0.00499304	0.00268026	0.00486539	0.00326185	0.00422208	0	0	0.00148331	0.00271473	0.00411925	0.00413731	0.00498956	0.000557932	0.000452899	0	0.0216371	0.00233413
CpG_11	chr1	32172768	-	0.00386207	0.00393983	0.00619278	0.00551914	0.00360881	0.00153257	0	0.00263775	0.00624645	0.00508475	0.00300188	0	0.00143802	0.0181818	0	0.00359454	0.00960307	0.00416006	0.00326633	0.00619835	0.00312224	0.00568322	0.00333489	0.000199045	0.00639349	0.00385972	0.00244618	0.00077951	0.00477786	0.00099975	0.0025076	0.00275028	0.00116981	0.00633182	0	0	0.000502513	0.00398865	0.00320715	0.00449042	0.00306459	0.000191314	0	0.000345304	0.000206356	0.00448928
CpG_12	chr1	32172787	-	0.00811469	0.00634473	0.0015932	0	0.0096532	0.000748783	0.00520427	0.00578202	0.0170534	0.00163613	0.00477941	0.00429307	0.00618499	0	0.000678887	0.00306387	0.00501882	0.00176125	0.00669145	0.00310776	0.00449001	0.00284183	0.00676496	0.000197511	0.000288392	0.00393391	0.00306649	0.00461767	0.00201174	0.00410711	0.0029578	0.00526202	0.0031003	0.00402202	0	0	0.000496032	0.00356169	0.00243322	0.0035457	0.000233672	0.000373902	0.000455789	0.000685871	0.000615258	0.00339423
CpG_13	chr1	32172789	-	0.00295144	0.00282287	0.00370763	0.00544588	0.00817923	0.00449944	0.00621762	0.00635471	0.00140252	0	0.00806747	0.00713878	0.000563857	0	0.00408163	0.00377626	0.00166736	0.00448168	0.00937115	0.00411862	0.00891481	0.00331769	0.00633969	0.0106973	0.00746055	0.00665536	0.00837899	0.00362219	0.00803169	0.00302807	0.00348395	0.00508328	0.00527688	0.0112098	0	0	0.000247463	7.5466e-05	0.00719499	0.00785326	0.0017454	0.000559701	0.000452899	0	0.000204374	0.0104358
CpG_14	chr1	32172796	-	0.00697612	0.0070497	0.00424741	0	0.00857143	0.00413223	0.00965553	0.0178366	0.0156819	0.00229283	0.00366838	0.00746269	0.0104846	0	0.00610376	0.0127479	0.00544161	0.0105737	0.0129225	0.0059656	0.00849158	0.00538468	0.00618068	0.000197511	0.00014403	0.0107372	0.00460197	0.00692194	0.00515828	0.00830251	0.00760095	0.0104042	0.0123097	0.00508295	0	0	0.000495417	0.00521187	0.0123169	0.00730665	0.00746095	0.0117801	0.000453721	0	0.000613497	0.00981956
CpG_15	chr1	32172808	-	0.0024187	0.0130465	0.00318387	0.00819952	0.00570817	0.00224803	0.0195465	0.00721709	0.00308902	0.000984575	0.00146681	0.00857143	0.00309336	0	0.00511073	0.00637695	0.00250574	0.00156617	0.00321623	0.00464998	0.00167808	0.00359037	0.00579475	0.0160523	0.00432588	0.00702884	0.000487013	0.00231405	0.00431223	0.00263983	0.00339289	0.00599716	0.00553528	0.00383223	0	0	0.00572709	0.00364575	0.00291091	0.00664527	0.00584727	0.000749906	0	0.0113246	0.000412116	0.006154
CpG_16	chr1	32172819	-	0.000271223	0.0089222	0.00374732	0.00484094	0.00683945	0.00189179	0.00735294	0.0046729	0.00566733	0.000331455	0	0.00492041	0.00771649	0	0.000690369	0.0152526	0.00950771	0.0088968	0.0105053	0.00538926	0.00308198	0.00541757	0.00603586	0	0.00428171	0.00416919	0.00653649	0.00513341	0.00655883	0.00901584	0.0049824	0.00726527	0.00810474	0.0044843	0.0035461	0	0.000252781	0.00797029	0.00793861	0.00616679	0.00716503	0.0334928	0.000932836	0.000351	0.000210881	0.00854045
CpG_17	chr1	32172826	-	0.00695187	0.0147783	0.00795334	0.00477164	0.012775	0.0164918	0.0191511	0.0149511	0.0178472	0.00979112	0.0102339	0.00684151	0.01693	0	0.0115176	0.0126701	0.0120985	0.0058434	0.010355	0.00593359	0.00850611	0.010716	0.0134205	0.00431711	0.0171429	0.0100234	0.0117288	0.0134148	0.00939931	0.0137009	0.00975252	0.0151025	0.0089372	0.0140174	0.00684932	0	0.0221784	0.0145558	0.0155238	0.0136572	0.0104384	0.00296956	0.000904159	0.0516304	0.015059	0.0174188
CpG_18	chr1	32172837	-	0.0086627	0.00991501	0.00321888	0.00480439	0.00358166	0.00227618	0.0151832	0.00350467	0.00621469	0.00860357	0.0133333	0.00173511	0.000568505	0	0.00273598	0.00903042	0.00338553	0.00393236	0.0019861	0.00881789	0.00536553	0.00491642	0.00406315	0.0186508	0.00201729	0.00540754	0.0120091	0.00840429	0.00545673	0.00545004	0.00392948	0.0087127	0.000854805	0.00720543	0	0	0	0.0100472	0.00572857	0.00620978	0.00653137	0	0.000907441	0.000683995	0.0217391	0.00861119
CpG_19	chr1	73924842	+	0.861872	0.919625	0.916723	0.865766	0.947127	0.891729	0.942138	0.891995	0.931627	0.865376	0.932155	0.897049	0.91622	0.91307	0.920303	0.877421	0.937673	0.90992	0.934547	0.920266	0.921616	0.936742	0.919997	0.935588	0.92789	0.892914	0.886272	0.883548	0.890397	0.907366	0.887492	0.932986	0.928224	0.925898	0.901015	0.90356	0.893426	0.919547	0.924899	0.932546	0.927786	0.951192	0.914625	0.900916	0.906335	0.888076
CpG_20	chr1	73924863	+	0.923724	0.937806	0.938278	0.943561	0.941201	0.9415	0.952556	0.930202	0.950913	0.931843	0.954173	0.937881	0.964064	0.917808	0.941138	0.938846	0.955862	0.944992	0.960397	0.940878	0.934183	0.950771	0.94212	0.931534	0.947524	0.929936	0.933578	0.922827	0.926618	0.931683	0.932144	0.95467	0.956358	0.959552	0.968443	0.903995	0.941522	0.948312	0.948909	0.952025	0.950871	0.963623	0.948385	0.927785	0.94941	0.932951
CpG_21	chr1	73924899	+	0.89659	0.932909	0.932637	0.918044	0.950174	0.926589	0.953509	0.915093	0.948516	0.905816	0.937853	0.896194	0.938299	0.923522	0.935456	0.921486	0.940107	0.922329	0.949802	0.919418	0.930588	0.936613	0.933944	0.938684	0.930659	0.906003	0.908338	0.903144	0.901493	0.918058	0.899722	0.931033	0.944218	0.936273	0.933898	0.941847	0.933707	0.945831	0.937363	0.941636	0.940767	0.945067	0.911069	0.94808	0.921043	0.924525
CpG_22	chr1	73924919	+	0.913743	0.932753	0.91358	0.922907	0.929464	0.918589	0.940775	0.92602	0.943208	0.925392	0.92713	0.896841	0.950531	0.90299	0.921484	0.921788	0.953301	0.936942	0.945852	0.920463	0.918868	0.937513	0.937314	0.943719	0.924777	0.927201	0.923791	0.915979	0.914986	0.924144	0.912202	0.940043	0.94573	0.943792	0.833049	0.933221	0.935907	0.94372	0.94427	0.93513	0.933527	0.951172	0.94171	0.929817	0.947459	0.923426
CpG_23	chr1	74027679	+	0.281635	0.508613	0.42711	0.259339	0.517164	0.387467	0.501964	0.350657	0.505981	0.355078	0.484629	0.420573	0.500737	0.357553	0.489303	0.374441	0.47661	0.351238	0.551989	0.46381	0.453317	0.522578	0.486189	0.481234	0.460674	0.385336	0.368365	0.319802	0.33435	0.349296	0.345607	0.49497	0.514299	0.481771	0.761538	0.175497	0.361051	0.506602	0.494461	0.484589	0.564757	0.472552	0.51964	0.375217	0.403476	0.358582
CpG_24	chr1	74027681	+	0.196881	0.457919	0.40563	0.167147	0.470544	0.305924	0.456761	0.277412	0.500596	0.304896	0.464801	0.329205	0.482657	0.3174	0.474156	0.313839	0.446572	0.295597	0.52594	0.426797	0.424124	0.493107	0.45977	0.459308	0.436638	0.320891	0.311535	0.257884	0.270418	0.275459	0.275319	0.461287	0.487928	0.449056	0.634615	0.177946	0.295753	0.481618	0.468939	0.465485	0.529062	0.464461	0.466435	0.306358	0.315105	0.302545
CpG_25	chr1	74027686	+	0.22098	0.479138	0.402216	0.172894	0.466388	0.338869	0.47241	0.283853	0.48156	0.299132	0.46337	0.340165	0.479252	0.316602	0.46232	0.312274	0.448651	0.316752	0.520879	0.425692	0.425764	0.478743	0.454458	0.451029	0.441696	0.327487	0.332093	0.264811	0.270162	0.302497	0.277489	0.45995	0.479228	0.451604	0.60198	0.152812	0.289956	0.48249	0.467371	0.460747	0.530858	0.451847	0.483507	0.333958	0.310026	0.313684
CpG_26	chr1	74027719	+	0.0898767	0.310173	0.28512	0.0655384	0.328977	0.157965	0.300433	0.127392	0.351935	0.154788	0.316004	0.197068	0.309225	0.136973	0.295054	0.12922	0.307308	0.169815	0.354455	0.285849	0.275542	0.353396	0.299245	0.321243	0.308383	0.190879	0.168834	0.144555	0.142542	0.150881	0.142721	0.316316	0.314844	0.301411	0.102317	0.0751898	0.122722	0.31203	0.286421	0.312539	0.368786	0.302519	0.381324	0.163466	0.199768	0.157928
CpG_27	chr1	75242907	-	0.890402	0.893523	0.888751	0.879651	0.885348	0.915179	0.931342	0.842902	0.889596	0.897969	0.911519	0.900766	0.918654	0.980132	0.905227	0.90055	0.899583	0.914244	0.915504	0.881861	0.89493	0.903201	0.8865	0.88007	0.895662	0.871584	0.869601	0.872099	0.88863	0.874148	0.876738	0.90521	0.900458	0.917476	1	0.717514	0.89016	0.910014	0.912453	0.90486	0.905936	0.888548	0.720901	0.92587	0.866703	0.884478
CpG_28	chr1	75242947	-	0.964242	0.954545	0.952295	0.978405	0.971406	0.953373	0.968848	0.944717	0.964947	0.955839	0.966843	0.958697	0.971292	1	0.960499	0.97014	0.968534	0.97161	0.963027	0.963889	0.95951	0.96713	0.9705	0.965889	0.975674	0.957874	0.95604	0.952532	0.953736	0.956885	0.960097	0.966434	0.96413	0.964753	0.826087	1	0.988057	0.972901	0.970157	0.963997	0.966929	0.958817	0.952618	0.944886	0.962764	0.964434
CpG_29	chr1	75242960	-	0.913224	0.931133	0.941292	0.93604	0.912694	0.929414	0.954733	0.900989	0.944703	0.925785	0.947711	0.927111	0.937361	0.947452	0.92154	0.940461	0.928731	0.921158	0.93685	0.933961	0.94725	0.935887	0.930128	0.962504	0.950122	0.90297	0.918611	0.925096	0.929092	0.90675	0.933552	0.937603	0.93517	0.946039	0.997821	0.932584	0.935416	0.930528	0.937129	0.938494	0.922508	0.913913	0.901629	0.958828	0.945244	0.938695
CpG_30	chr1	75242988	-	0.959459	0.941627	0.957022	0.940938	0.945805	0.962584	0.951171	0.961797	0.940465	0.955526	0.973631	0.942786	0.931211	1	0.976725	0.935112	0.964513	0.941246	0.942949	0.958907	0.953747	0.94646	0.951776	0.951087	0.95339	0.942837	0.938116	0.943168	0.943588	0.952255	0.943834	0.944608	0.95075	0.962521	1	0.927374	0.91064	0.951087	0.954389	0.953755	0.960781	0.938281	1	0.951785	0.912974	0.936191
CpG_31	chr1	137182659	-	0.92823	0.871099	0.854063	0.894994	0.897705	0.880806	0.884615	0.865929	0.855381	0.872072	0.80919	0.866351	0.921395	0.941278	0.931624	0.868989	0.89574	0.897644	0.901639	0.864571	0.85294	0.871199	0.879609	0.879499	0.890971	0.862365	0.880566	0.885541	0.875387	0.865752	0.875134	0.87598	0.878364	0.865362	0.989547	0.877831	0.904889	0.89745	0.893688	0.859399	0.884134	0.912783	0.875663	0.909453	0.934419	0.885904
CpG_32	chr1	137182663	-	0.821414	0.843206	0.797868	0.832392	0.781457	0.833525	0.815419	0.774034	0.783721	0.790976	0.790588	0.822678	0.822961	0.826786	0.796543	0.834274	0.813883	0.855341	0.829946	0.806831	0.779968	0.822139	0.827474	0.828139	0.806103	0.785782	0.804436	0.824792	0.824141	0.806578	0.803512	0.805076	0.804407	0.802175	0.878453	0.83265	0.884079	0.826521	0.820384	0.815607	0.834565	0.848711	0.815052	0.876799	0.88408	0.851971
CpG_33	chr1	137182669	-	0.807846	0.823198	0.797363	0.808661	0.835141	0.852593	0.902841	0.812865	0.770971	0.832849	0.792699	0.785783	0.860419	0.878369	0.883899	0.833056	0.843186	0.834586	0.812798	0.803957	0.789063	0.817923	0.834062	0.834036	0.839762	0.819502	0.823445	0.838048	0.810992	0.8077	0.82692	0.806598	0.829828	0.812788	0.765579	0.883639	0.89768	0.843471	0.821856	0.818769	0.843758	0.849416	0.819426	0.85867	0.863576	0.83183
CpG_34	chr1	137182680	-	0.884232	0.845023	0.826963	0.880325	0.867247	0.858065	0.90884	0.857247	0.769743	0.867452	0.792428	0.857281	0.901606	0.906773	0.843924	0.870401	0.867207	0.867707	0.865763	0.836975	0.835906	0.865675	0.862788	0.864144	0.863991	0.858375	0.868547	0.869927	0.860156	0.871312	0.871304	0.842813	0.872844	0.838754	1	0.939477	0.918792	0.861053	0.86216	0.859631	0.87299	0.891518	0.885914	0.901207	0.911814	0.887081
CpG_35	chr1	158251340	-	0.713953	0.764562	0.682451	0.68015	0.688541	0.670721	0.61694	0.64856	0.667622	0.725129	0.662632	0.668963	0.707579	0.937984	0.707145	0.664202	0.700655	0.686427	0.669908	0.657609	0.661712	0.699227	0.654646	0.711196	0.640582	0.660456	0.664584	0.662602	0.669033	0.738297	0.697164	0.658474	0.657468	0.70386	NA	NA	0.593792	0.660856	0.690309	0.640202	0.635289	0.709125	0.669903	0.627119	0.65783	0.693336
CpG_36	chr1	158251393	-	0.844944	0.827342	0.785999	0.872222	0.823139	0.833584	0.778088	0.860397	0.77776	0.850402	0.808824	0.862872	0.828354	0.806084	0.767707	0.818589	0.78226	0.882518	0.791678	0.783288	0.769836	0.81274	0.769721	0.764217	0.822473	0.804709	0.851985	0.849811	0.83115	0.851251	0.848439	0.810189	0.815012	0.80844	NA	NA	0.890699	0.802373	0.822111	0.798497	0.785424	0.961771	0.849609	0.787033	0.729636	0.856746
CpG_37	chr1	158251435	-	0.822241	0.784132	0.751914	0.863248	0.762215	0.806701	0.722358	0.85167	0.798493	0.821768	0.74503	0.85936	0.762385	0.621212	0.799651	0.821962	0.764795	0.843728	0.748034	0.775332	0.725591	0.797803	0.750371	0.863636	0.800377	0.814282	0.801527	0.794685	0.840572	0.835131	0.822131	0.749725	0.747702	0.77809	NA	NA	0.582329	0.717305	0.760962	0.728536	0.718513	0.75599	0.763006	0.708138	0.84668	0.820152
CpG_38	chr1	158251440	-	0.930293	0.907445	0.896678	0.937638	0.881745	0.930591	0.868029	0.968537	0.899276	0.933866	0.890159	0.952827	0.908028	0.996212	0.864714	0.936993	0.886216	0.94141	0.893599	0.876686	0.878129	0.935824	0.874039	0.842569	0.940252	0.920627	0.920838	0.918605	0.943852	0.956964	0.934593	0.88234	0.894353	0.905485	NA	NA	0.894244	0.889806	0.875243	0.894411	0.896172	0.969697	1	0.888785	0.936129	0.920991
CpG_39	chr1	158251446	-	0.864314	0.865539	0.808595	0.863552	0.776129	0.877035	0.785937	0.879987	0.814151	0.859898	0.813028	0.882372	0.825152	1	0.818404	0.84424	0.838369	0.870012	0.830851	0.825157	0.832053	0.859669	0.792258	0.943325	0.903354	0.887205	0.849459	0.853988	0.870659	0.854671	0.860874	0.833223	0.827606	0.826192	NA	NA	0.593583	0.803403	0.84574	0.81598	0.846859	0.821676	0.913295	0.893358	0.829756	0.889496
CpG_40	chr1	186240856	-	0.702802	0.477089	0.483007	0.70336	0.439364	0.706912	0.492424	0.727842	0.556604	0.699566	0.462299	0.580749	0.411636	0.832759	0.540845	0.660815	0.545924	0.613158	0.483169	0.550595	0.578487	0.668637	0.574726	0.791183	0.770492	0.709832	0.753562	0.718618	0.727029	0.798512	0.671352	0.537873	0.590354	0.605326	1	0.786477	0.961232	0.58516	0.532704	0.547976	0.729344	0.70972	0.697549	0.764903	0.857013	0.662073
CpG_41	chr1	186240902	-	0.810573	0.538058	0.529412	0.765517	0.470472	0.783088	0.652908	0.770723	0.647863	0.752137	0.553922	0.662393	0.491228	0.975862	0.540616	0.69986	0.548975	0.674346	0.550308	0.643541	0.658112	0.781425	0.633256	0.934783	0.890092	0.804936	0.851801	0.783582	0.799005	0.894996	0.767788	0.590227	0.676364	0.677223	1	0.687943	0.934722	0.696081	0.602462	0.617698	0.83652	0.873688	0.81764	0.872697	0.94426	0.73563
CpG_42	chr1	186240905	-	0.712389	0.544236	0.507157	0.71659	0.474206	0.731618	0.672348	0.720143	0.586207	0.712121	0.556373	0.624464	0.47046	0.955326	0.514124	0.654494	0.555556	0.652356	0.516495	0.619229	0.640314	0.763896	0.603338	0.924109	0.87846	0.766422	0.792058	0.740781	0.759773	0.851247	0.730441	0.577594	0.654419	0.656077	1	0.687943	0.900069	0.67302	0.578608	0.600127	0.838193	0.830585	0.738975	0.871237	0.907831	0.704097
CpG_43	chr10	33624462	-	0.00167598	0.00330033	0.0166359	0.0131004	0.0105411	0.0055788	0.00562114	0.00907441	0.0150875	0.0108696	0.0204444	0.00234467	0	0	0.00778816	0.00808961	0	0.00322581	0.0196663	0.00926186	0.00281393	0.00792393	0.0156851	0	0.0136054	0.0126761	0.0152672	0.0113881	0.00631528	0.002664	0.0142951	0.012909	0.00662954	0.00720504	0	NA	0.00218341	0.0148416	0.00544569	0.00260146	0.0314557	0	0.135135	0	0.0540827	0.000636537
CpG_44	chr10	33624466	-	0.00498615	0.00484262	0.0138138	0.0138408	0.0136893	0	0.00721021	0.00059952	0	0.00334672	0.000858369	0.00114416	0.00990099	0	0.011976	0.0145631	0.00630915	0.0184502	0.0157987	0.0083426	0.00522284	0.000394789	0.00587889	0	0.0264151	0.00618673	0.0107095	0.00579151	0.00553417	0.00963775	0.0084801	0.00861498	0.00291545	0.0104322	0.479339	NA	0	0.00159553	0.0059761	0.0100567	0.00073692	0	0	0.0527523	0	0.00398992
CpG_45	chr10	33624482	-	0.00944969	0.00646204	0.00906344	0.0103986	0.0192044	0.0250169	0.0116861	0.00778443	0.00119403	0.0330411	0.0137339	0.00287191	0.011208	0	0.0248307	0.010929	0.00451467	0.0105597	0.00352113	0.0103035	0.0070028	0.0158793	0.0147145	0.00133869	0.000754717	0.00732188	0.00356347	0.0075285	0.0118472	0.0153078	0.00827166	0.00885347	0.0232927	0.0111011	0.478992	NA	0	0.0128257	0.0109258	0.00723327	0.0102941	0	0	0	0	0.0252738
CpG_46	chr10	33624490	-	0.0177384	0.00974817	0.00509898	0.0133563	0.0208833	0.011444	0.00943135	0.00268737	0.0166965	0.019424	0.00385604	0.0105684	0.0052599	0.003125	0.00859171	0.01698	0.0139734	0.0124602	0.0157802	0.0137043	0.0105921	0.0238514	0.0159871	0.000664452	0	0.0140036	0.0173449	0.0101128	0.0139423	0.0140682	0.00842879	0.00647853	0.0184672	0.00519828	0.485477	NA	0	0.0206431	0.00951029	0.0160277	0.00182682	0	0	0	0	0.0226798
CpG_47	chr10	33624498	-	0.0235522	0.0235103	0.0150015	0.00946644	0.0120069	0.00170242	0.0229499	0.018513	0.014093	0.0100334	0.00857633	0.000860338	0.00682806	0.0124611	0.00597907	0.010929	0.0105904	0.0118796	0.0119848	0.0110304	0.000867002	0.0113971	0.0138848	0.0444297	0	0.0107843	0.0110939	0.00691857	0.00960154	0.00561612	0.00551948	0.00704923	0.013686	0.011742	0.475207	NA	0	0.0125124	0.00840336	0.00704676	0.0128064	0.0168599	0.00149701	0	0	0.0220573
CpG_48	chr10	33624501	-	0.00334355	0.00162206	0.00392512	0.00345423	0.00894393	0.0115059	0.0122597	0.00269703	0.00775888	0.006393	0.0116379	0.000865052	0.0193387	0	0	0.00122474	0.007281	0.00845666	0.00558331	0.0186588	0.0114396	0.00813169	0.00756228	0	0.00075959	0.00156051	0.0171094	0.0106992	0.0133787	0.00671479	0.00842727	0.0163497	0.00334314	0.00452011	0.481172	NA	0	0.0082495	0.0168273	0.00936159	0	0	0	0	0.00771605	0.00595555
CpG_49	chr10	33624503	-	0.0086159	0.00161551	0.00331825	0.0168248	0.00344234	0.00544588	0.00613497	0.00239664	0.0175857	0.00671366	0.000858738	0.00601547	0.00466273	0	0.022281	0.00303951	0.0085934	0.010582	0.00176678	0.00639422	0.00764553	0.011839	0.00850066	0	0	0.000140292	0.0229245	0.00663883	0.00469653	0.0136054	0.00847089	0.0121172	0.00937417	0.00387308	0	NA	0	0.00877893	0.00569476	0.00205867	0	0.000528262	0	0	0.000510725	0.00598551
CpG_50	chr10	33624508	-	0.0100028	0.00040404	0.00721371	0.00605013	0.0138169	0.00778342	0.00222655	0.0095751	0.0131618	0.0157771	0.00516129	0.00200401	0.000310463	0	0.0194903	0.00881191	0.000904977	0.00765576	0.00732923	0.00473934	0.00680153	0.0145526	0.00547742	0	0	0.00255174	0.0218263	0.00708611	0.0127149	0.0005	0.00967707	0.0063263	0.0157124	0.0104618	0.477178	NA	0	0.0102123	0.00328243	0.0158505	0.0095941	0	0	0	0	0.00567048
CpG_51	chr10	33624547	-	0.0373051	0.00161551	0.00481058	0.00688468	0.00616016	0.000677048	0.0178871	0.003003	0.0220107	0.0107311	0.00943396	0.0126002	0.0170347	0	0.00374532	0.006691	0.0108303	0.0195045	0.00350058	0.006639	0.0121065	0.00976562	0.0122556	0	0	0.0128599	0.0124224	0.00280838	0.00335651	0.00561427	0.00454447	0.0109794	0.00894031	0.00327381	0.479339	NA	0	0.00596896	0.00937234	0.0100283	0	0	0	0	0.00101729	0.00417973
CpG_52	chr10	33624549	-	0.00611111	0.0128928	0.00180072	0.00946644	0.0136893	0.0101215	0.00888395	0.00119617	0.00771971	0.00467602	0.00258844	0.0159726	0.00743494	0	0.0114068	0.00727273	0.0112562	0.00738007	0.0046729	0.00554785	0.00449827	0.0102121	0.0116686	0.00132275	0.0187126	0.00139782	0.0155211	0.00916649	0.00720461	0.0118812	0.00625809	0.00504829	0.00577579	0.0059312	0.479339	NA	0.0043573	0.00317334	0.00595576	0.00743018	0	0	0	0.118721	0.00101626	0.0131689
CpG_53	chr10	33624551	-	0.00665557	0.00241935	0.00540216	0.00689655	0.0233516	0.00542005	0.00554939	0.00597372	0.00416667	0.0167112	0.00343938	0.00803674	0.0130273	0	0.0188679	0.0103406	0.0139766	0.00527704	0.00705882	0.00691563	0.00311742	0	0.0108156	0.00264201	0.00898204	0.0109274	0.000887311	0.00234342	0.00601251	0.0132231	0.00388853	0.00858275	0.00630583	0.00653595	0	NA	0	0.0055666	0.00595407	0.00461894	0.0124451	0	0	0	0.00918367	0.00459386
CpG_54	chr10	33624566	-	0.00331675	0.0241741	0.00838826	0.0300687	0.0330124	0.0201884	0.0133111	0.0179104	0.0219715	0.0308932	0.0129534	0.00513699	0.0123916	0	0.0119403	0.0133414	0.0189019	0.0349391	0.0186807	0.0265413	0.015928	0.0153181	0.0154835	0.001321	0.026926	0.0162511	0.0430155	0.0129815	0.0187006	0.0122314	0.0110223	0.0203992	0.0131961	0.0148987	0.479339	NA	0	0.0107058	0.0173001	0.00717765	0.0182615	0.0210305	0	0.086758	0.0182741	0.00688935
CpG_55	chr10	54755445	+	0.924898	0.903308	0.924276	0.897436	0.876279	0.966624	0.939073	0.917735	0.91123	0.922414	0.927007	0.905208	0.943853	1	0.967941	0.966499	0.914122	0.901587	0.912442	0.904708	0.878711	0.905133	0.908829	0.926363	0.905739	0.932803	0.909757	0.918225	0.920288	0.927099	0.930735	0.921532	0.917836	0.911472	NA	0.948424	0.836743	0.926621	0.923765	0.935892	0.927424	0.908291	0.834581	0.940718	0.920736	0.936179
CpG_56	chr10	54755455	+	0.776327	0.843236	0.805339	0.782927	0.816251	0.795455	0.850331	0.810982	0.838036	0.869007	0.837209	0.873575	0.879961	0.852761	0.813559	0.831667	0.824287	0.841053	0.819005	0.855058	0.818763	0.795772	0.826803	0.85748	0.83473	0.833706	0.806527	0.822912	0.823195	0.859321	0.826918	0.849172	0.833141	0.832052	NA	0.542857	0.870437	0.864952	0.838207	0.840333	0.848607	0.829006	0.846557	0.841168	0.856431	0.808541
CpG_57	chr10	54755507	+	0.939468	0.947368	0.947016	0.852779	0.91105	0.908917	0.97892	0.918172	0.963408	0.923242	0.909423	0.909138	0.926306	0.966206	0.896719	0.910908	0.968649	0.916623	0.94515	0.932079	0.904901	0.903463	0.918336	0.917211	0.915577	0.899432	0.920415	0.925498	0.920915	0.903071	0.934209	0.939906	0.926047	0.919048	NA	0.879656	0.982866	0.957013	0.943529	0.941181	0.926236	0.93785	0.860308	0.967936	0.91937	0.93712
CpG_58	chr10	54755519	+	0.944123	0.960948	0.936968	0.894802	0.94295	0.966645	0.970957	0.929919	0.951621	0.956255	0.962362	0.91383	0.941293	1	0.92081	0.910866	0.940326	0.950187	0.947344	0.941417	0.925202	0.934527	0.939598	0.98949	0.931099	0.931772	0.930677	0.944358	0.946659	0.925548	0.945899	0.948921	0.948545	0.92657	NA	1	0.918636	0.96275	0.957607	0.947558	0.908207	0.943029	0.99733	0.927964	0.933221	0.939206
CpG_59	chr10	54755533	+	0.935484	0.96424	0.921613	0.890394	0.926335	0.934866	0.951634	0.93617	0.93501	0.905953	0.890351	0.903866	0.906863	0.96	0.940462	0.936348	0.96186	0.847296	0.963437	0.921038	0.906705	0.931737	0.917497	0.930139	0.914129	0.9017	0.884805	0.910538	0.919084	0.888794	0.904721	0.898292	0.923123	0.931381	NA	1	0.982759	0.936052	0.935366	0.93641	0.918841	0.941328	0.875096	0.896581	0.934097	0.921374
CpG_60	chr10	66921261	-	0.0353357	0.333333	0.505435	0.0280374	0.484018	0.0813008	0.372093	0.0804598	0.371622	0.378151	0.51938	0.0612245	0.18543	0.172414	0.367257	0.218978	0.132231	0.294643	0.53317	0.423166	0.387649	0.439241	0.382719	0.303056	0.412739	0.247667	0.215834	0.179684	0.199667	0.187849	0.211755	0.350596	0.421765	0.407863	0	0.260494	0.25088	0.405776	0.400696	0.387722	0.388253	0.449505	0.441811	0.222992	0.271414	0.195567
CpG_61	chr10	66921282	-	0.04947	0.0704225	0.224638	0.0233645	0.0630631	0.0284553	0.258824	0.0344828	0	0	0.0852713	0.00813008	0.0927152	0.0574713	0.353982	0	0.115702	0.0623608	0.2	0.144383	0.149121	0.194396	0.143677	0.0695689	0.149788	0.0891851	0.0619936	0.0557799	0.0619886	0.0635007	0.0681741	0.132024	0.166212	0.161326	0	0.00123153	0.102679	0.1406	0.161869	0.133769	0.117078	0.164994	0.255177	0.0623206	0.04329	0.0650651
CpG_62	chr10	66921285	-	0	0	0.0328467	0	0.230769	0.0246914	0	0	0	0	0	0.00813008	0.033557	0	0.106667	0	0.041841	0	0.0808824	0.0563483	0.056458	0.0539379	0.0405405	0.00760511	0.063764	0.0376993	0.0166825	0.0204674	0.0232285	0.0223867	0.0223579	0.0301418	0.0458689	0.0454081	0	0	0.000197044	0.0353525	0.0576949	0.0398114	0.0636448	0.0255791	0.0506406	0.0273131	0.0410702	0.023211
CpG_63	chr10	66921292	-	0.035461	0.197183	0.245009	0.028169	0.268182	0.0325203	0.4	0.0574713	0.0135135	0.0338983	0.261538	0.0408163	0.186667	0.110855	0.207048	0.111498	0.19917	0.132287	0.263415	0.260238	0.231312	0.273936	0.243165	0.147418	0.205042	0.111127	0.105785	0.102632	0.103215	0.0998896	0.0955003	0.227649	0.252644	0.225883	0	0	0.149286	0.247831	0.253142	0.225213	0.229691	0.235538	0.218176	0.192755	0.215853	0.115365
CpG_64	chr10	66921314	-	0.0492958	0.225352	0.400722	0.0560748	0.54955	0.0650407	0.255814	0.0229885	0.413333	0.116667	0.692308	0.130081	0.146667	0.0779817	0.377193	0.218978	0.256198	0.262222	0.42439	0.377669	0.359955	0.411469	0.347847	0.292669	0.3518	0.234619	0.168934	0.161785	0.181831	0.170696	0.17842	0.316446	0.380605	0.368005	0	0.267813	0.248155	0.357919	0.377843	0.367736	0.368201	0.382345	0.453012	0.236621	0.226026	0.163396
CpG_65	chr10	71344342	+	0.0225806	0	0	0	0.0196078	0	0	0	0	0	0	0	0	0	0	0	0	0.0175953	0	0.0098912	0.0237812	0.01875	0.00990099	0	0	0.00983021	0	0	0.00865052	0	0.0014782	0.00101317	0.00704846	0.00105708	NA	NA	0	0.00147275	0.0010627	0	0	0	NA	0	0	0.000981354
CpG_66	chr10	71344392	+	0.00163132	0	0	0.00441501	0	0	0	0	0.00387597	0	0	0.0341463	0	0	0	0	0.00166667	0.00148148	0	0.0212014	0.00120265	0.0158932	0.010828	0	0	0.0232346	0.0016538	0.00272851	0.000440335	0.00195408	0.00187126	0.00979887	0.00223414	0.00267953	NA	NA	0	0.00149589	0.0112179	0.0294416	0.00125945	0.00285714	NA	0	0	0.0124813
CpG_67	chr10	71344396	+	0	0	0	0	0	0	0	0	0.0503876	0	0	0	0	0	0	0	0	0	0	0.000497265	0.00958658	0	0	0	0	0.0171094	0.0141381	0.00944245	0.00043592	0.000965251	0.0141369	0	0.00310146	0.00961025	NA	NA	0	0.00074129	0.0016	0.0252525	0	0	NA	0	0.00900901	0.03667
CpG_68	chr10	71344409	+	0	0	0.00473934	0	0	0	0	0	0.0482897	0	0	0	0.104089	0	0.0108696	0	0	0.00615385	0.012987	0	0.0360076	0.000675676	0	0	0	0	0.0017321	0.000480769	0.00736988	0	0.00039604	0.00818777	0.00282885	0	NA	NA	0	0	0.00453772	0	0	0	NA	0	0	0.00105042
CpG_69	chr10	79888720	-	0.929577	0.878338	0.950464	0.898204	0.945879	0.917318	0.894521	0.890585	0.9109	0.904025	0.939486	0.877358	0.865828	1	0.886675	0.867498	0.895871	0.902098	0.893709	0.93444	0.928851	0.912915	0.947135	0.920998	0.912341	0.93413	0.924402	0.926268	0.919055	0.906631	0.886459	0.897223	0.930049	0.932226	NA	1	0.931643	0.902284	0.928971	0.915854	0.950557	0.875613	1	0.963865	0.923461	0.914143
CpG_70	chr10	79888723	-	0.884024	0.889717	0.84474	0.892857	0.933742	0.954036	0.909465	0.854088	0.93762	0.897833	0.893617	0.92562	0.882105	0.905405	0.916877	0.873545	0.951865	0.91573	0.91358	0.896463	0.882587	0.909463	0.89897	0.793539	0.969612	0.911406	0.906647	0.908199	0.867273	0.943958	0.884506	0.908697	0.923521	0.902153	NA	1	0.916481	0.932646	0.927296	0.929204	0.935689	0.938328	0.825829	0.929952	0.912088	0.891039
CpG_71	chr10	79888726	-	0.941874	0.966817	0.912551	0.888554	0.950434	0.916854	0.875691	0.913924	0.971182	0.94682	0.940458	0.904142	0.912169	0.906667	0.864151	0.918623	0.941496	0.91696	0.9563	0.948407	0.944045	0.947227	0.959987	0.901389	0.96623	0.954109	0.945193	0.942004	0.945085	0.946093	0.939125	0.952076	0.942878	0.927131	NA	0.68984	0.965708	0.955038	0.963911	0.938576	0.967029	0.917864	1	0.93617	0.848244	0.936799
CpG_72	chr10	79888729	-	0.966825	0.962406	0.952965	0.93722	0.969059	0.955107	0.961111	0.974716	0.964661	0.962617	0.98	0.97619	0.947589	1	0.958228	0.949961	0.971738	0.964211	0.96732	0.977084	0.977099	0.967847	0.966052	0.99859	0.946737	0.975789	0.958949	0.956427	0.957243	0.969892	0.969253	0.945529	0.95525	0.936785	NA	0.989189	0.996644	0.958696	0.947505	0.961989	0.964514	0.999088	0.99645	0.999195	0.92093	0.973568
CpG_73	chr10	79888747	-	0.928529	0.918596	0.883163	0.914307	0.943558	0.914382	0.886364	0.947667	0.95584	0.949458	0.974144	0.96213	0.948677	0.92	0.921102	0.910436	0.925037	0.928095	0.953261	0.938213	0.950898	0.957118	0.967124	0.975507	0.942314	0.93221	0.916864	0.904891	0.922557	0.935178	0.930646	0.920431	0.934682	0.94729	NA	1	0.921373	0.952924	0.94677	0.955787	0.955579	0.890192	0.964181	0.963507	0.885991	0.952524
CpG_74	chr10	79888754	-	0.925267	0.96503	0.924873	0.980684	0.963914	0.93931	0.915638	0.949399	0.95983	0.921313	0.942468	0.961787	0.930099	1	0.945205	0.909161	0.924047	0.970123	0.9794	0.942316	0.932494	0.946359	0.954991	0.971626	0.938424	0.963278	0.915802	0.95064	0.942765	0.917222	0.934296	0.957356	0.954944	0.9366	NA	1	0.999449	0.944268	0.964277	0.945431	0.942737	0.942333	0.894001	0.970173	0.914787	0.945287
CpG_75	chr10	79888765	-	0.965599	0.974702	0.977017	0.945063	0.979038	0.995541	0.995876	0.967026	0.964846	0.971119	0.937737	0.976034	0.983727	1	0.996262	0.976135	0.97072	0.978581	0.96639	0.963762	0.968069	0.982964	0.977767	0.983669	0.992231	0.979608	0.957183	0.968312	0.966513	0.954381	0.971808	0.961853	0.983154	0.973744	NA	1	0.85351	0.990108	0.969666	0.974581	0.995977	1	0.999417	0.998819	0.965568	0.958572
CpG_76	chr10	79888798	-	0.861865	0.890208	0.877157	0.837037	0.842805	0.895323	0.872777	0.878635	0.919308	0.806783	0.879336	0.832941	0.841831	0.746667	0.915528	0.851278	0.907463	0.853556	0.900648	0.87514	0.861979	0.833779	0.859887	0.96547	0.85729	0.875298	0.792903	0.836905	0.853871	0.870112	0.839912	0.823974	0.880502	0.852665	NA	1	0.924009	0.886601	0.899337	0.835297	0.911652	0.956793	0.930314	0.774471	0.906523	0.838937
CpG_77	chr10	79888800	-	0.961268	0.9273	0.915822	0.869822	0.943902	0.931034	0.943836	0.967459	0.904627	0.86961	0.97281	0.937055	0.921218	0.906667	0.911801	0.866976	0.93925	0.880056	0.942363	0.921569	0.927131	0.933422	0.936358	0.95442	0.955372	0.899973	0.924397	0.878216	0.912715	0.926385	0.908034	0.929734	0.927693	0.924559	NA	0.786096	0.922992	0.923686	0.945334	0.907649	0.938087	0.927329	0.936121	0.951449	0.911471	0.911838
CpG_78	chr10	79888816	-	0.742958	0.688427	0.836879	0.731454	0.769512	0.707778	0.772914	0.685857	0.792453	0.62115	0.763198	0.672515	0.736733	0.92	0.757764	0.698376	0.76891	0.73431	0.768732	0.831747	0.72121	0.800962	0.782362	0.807453	0.815844	0.767943	0.744984	0.695736	0.730875	0.712067	0.693616	0.77859	0.782502	0.762172	NA	0.663102	0.798901	0.860671	0.768742	0.807949	0.851478	0.836007	1	0.809561	0.595179	0.699682
CpG_79	chr10	79888822	-	0.767606	0.875371	0.871066	0.769231	0.852259	0.869955	0.898769	0.819775	0.879131	0.820803	0.84139	0.791569	0.765869	0.733333	0.87205	0.767442	0.865269	0.747038	0.814574	0.888827	0.825008	0.85699	0.888644	0.857833	0.886106	0.874204	0.853353	0.81937	0.838222	0.841098	0.826627	0.84659	0.881093	0.879112	NA	1	0.685714	0.873061	0.85816	0.856814	0.88827	0.9037	0.932558	0.886453	0.837838	0.821445
CpG_80	chr10	80003545	+	0.786351	0.817821	0.804315	0.818032	0.763335	0.816689	0.795728	0.832597	0.811451	0.843537	0.855381	0.762341	0.784014	0.887512	0.795602	0.821779	0.796954	0.819892	0.841703	0.791575	0.756347	0.826912	0.791483	0.7848	0.857641	0.792898	0.803628	0.806887	0.809067	0.821101	0.813764	0.799303	0.801873	0.811773	0.947814	0.839529	0.851537	0.838532	0.824462	0.841108	0.886762	0.901509	0.878616	0.889701	0.861387	0.826591
CpG_81	chr10	80003571	+	0.390489	0.492188	0.49327	0.358258	0.397964	0.35941	0.515879	0.426271	0.515691	0.438961	0.536976	0.375	0.467578	0.394373	0.4715	0.410064	0.459077	0.431926	0.450723	0.485119	0.452386	0.502158	0.505133	0.47539	0.516363	0.436272	0.40389	0.409057	0.399446	0.372084	0.385005	0.471675	0.455436	0.446896	0.539437	0.377943	0.401136	0.478431	0.44337	0.478502	0.490529	0.513636	0.446652	0.451918	0.377814	0.397264
CpG_82	chr10	80003628	+	0.727089	0.768627	0.765925	0.732319	0.720859	0.737764	0.759022	0.730316	0.751062	0.77795	0.789678	0.704892	0.732501	0.811414	0.761473	0.748396	0.737183	0.758116	0.78715	0.727849	0.719153	0.744855	0.736011	0.758841	0.748445	0.72749	0.738902	0.765206	0.742155	0.717688	0.739734	0.740723	0.748076	0.73416	0.883024	0.713043	0.746967	0.78367	0.755414	0.775656	0.795958	0.817217	0.750976	0.784251	0.771687	0.740515
CpG_83	chr10	80200721	+	0.913032	0.950801	0.931313	0.896981	0.911308	0.913572	0.922442	0.907041	0.913676	0.949092	0.953356	0.891206	0.922352	0.899873	0.96009	0.913462	0.934916	0.915645	0.926302	0.92001	0.921175	0.919447	0.920117	0.924276	0.92474	0.917598	0.909445	0.889057	0.892988	0.910453	0.900427	0.934936	0.939233	0.940484	1	0.822581	0.905109	0.933092	0.92947	0.940349	0.949591	0.911283	0.951944	0.938693	0.91884	0.916896
CpG_84	chr10	80200787	+	0.89982	0.941737	0.924162	0.895672	0.903722	0.947588	0.932142	0.915966	0.93295	0.907355	0.916349	0.883974	0.947908	0.917513	0.926897	0.913422	0.925402	0.910601	0.929617	0.907471	0.922487	0.917553	0.895021	0.945558	0.915287	0.897596	0.90375	0.908681	0.895225	0.902537	0.897561	0.916601	0.922769	0.914993	0.520325	0.797297	0.936864	0.931145	0.924251	0.922247	0.917248	0.935895	0.923134	0.947114	0.928892	0.933291
CpG_85	chr10	80347603	+	0.0890411	0.110368	0.0679612	0.047619	0.080597	0.0723404	0.0948276	0.0477707	0.125604	0.09375	0.119835	0.0361011	0.0382166	NA	0.0543478	0	0.125581	0.0242424	0.0990099	0.184406	0.178279	0.163009	0.155056	0.357143	0.164384	0.108209	0.0463576	0.107784	0.158273	0	0.0588235	0.0328283	0.123552	0.0740741	NA	NA	NA	0.0437956	0.104651	0.0840708	NA	NA	NA	NA	NA	0.0485075
CpG_86	chr10	80347610	+	0.0730594	0.087108	0.0873786	0.0531915	0.0208955	0	0.0260116	0.0543131	0.164649	0.102222	0.0702479	0.0110294	0.0859873	NA	0.178378	0	0.223256	0.0484848	0.0693069	0.129073	0.202454	0.1125	0.172646	0	0.184932	0.102612	0.0855263	0.0714286	0.129496	0.15	0.0637255	0.043038	0.0733591	0.0373832	NA	NA	NA	0.00729927	0.142857	0.0929204	NA	NA	NA	NA	NA	0.0780669
CpG_87	chr10	80347628	+	0.0639269	0.107023	0.100324	0.0952381	0.0508982	0.140426	0.109195	0.0737179	0.154217	0.0535714	0.18595	0.0763636	0.0700637	NA	0.12973	0.0731707	0.213953	0.121212	0.0693069	0.154703	0.208163	0.08125	0.150562	0.642857	0.212329	0.0968343	0.0427632	0.0714286	0.28777	0	0.107843	0.138889	0.178988	0.138889	NA	NA	NA	0.10219	0.200772	0.123894	NA	NA	NA	NA	NA	0.148699
CpG_88	chr10	80347687	+	0.123494	0.148305	0.123932	0.126761	0.0891473	0.124294	0.208481	0.161826	0.123839	0.131429	0.130653	0.0990566	0.178295	NA	0.219697	0.180328	0.136905	0.0984848	0.0972222	0.213534	0.139037	0.118367	0.203039	0	0.0956522	0.142857	0.127049	0.0416667	0.226415	0	0.070922	0.136213	0.258706	0.107143	NA	NA	NA	0.103774	0.20098	0.118012	NA	NA	NA	NA	NA	0.168317
CpG_89	chr10	80347707	+	0.0785219	0.129252	0.0424837	0.134409	0.0945122	0.133047	0.0985507	0.207792	0.100737	0.0990991	0.13278	0.107407	0.0900322	NA	0.122905	0.120482	0.280952	0.0552147	0.247525	0.16771	0.206186	0.21519	0.214123	0.464286	0.0896552	0.112994	0.18	0.127273	0.175182	0	0.118812	0.169231	0.159533	0.264151	NA	NA	NA	0.0882353	0.171315	0.125561	NA	NA	NA	NA	NA	0.185606
CpG_90	chr10	80347710	+	0.0715935	0.101695	0.135314	0.0698925	0.0757576	0.110132	0.0864553	0.10356	0.0761671	0.045045	0.0580913	0.0774908	0.105431	NA	0.0718232	0.108434	0.236967	0.0552147	0.0891089	0.122807	0.123711	0.121019	0.155859	0	0.171429	0.129524	0.123746	0.0542169	0.00729927	0	0.029703	0.159794	0.108949	0.169811	NA	NA	NA	0.0735294	0.150407	0.0900901	NA	NA	NA	NA	NA	0.109434
CpG_91	chr10	80347722	+	0.0369515	0.0671141	0.0876623	0.010582	0.012012	0.0300429	0.0520231	0.108626	0.062954	0.107623	0.0705394	0	0.0929487	NA	0.0164835	0.0722892	0	0.0368098	0	0.132754	0.0985626	0.0595611	0.0843645	0	0.109589	0.0619137	0.0526316	0.0538922	0	0	0.0640394	0.0637755	0.0465116	0.254717	NA	NA	NA	0.0808824	0.116279	0	NA	NA	NA	NA	NA	0.0895522
CpG_92	chr10	81431184	+	0	0	0	0.0165289	0.0017331	0	0.0127971	0	0	0	0	0	0	NA	0	0.00429185	0	0	0.00531915	0.00644641	0.000900901	0	0.0017301	0	0.00223714	0.00101317	0.00166945	0.000634921	0.00588235	0.00124378	0.00289017	0.00697085	0	0	NA	NA	0	0.00299401	0.000682128	0	0	0	0	0	0	0
CpG_93	chr10	81431200	+	0	0	0.0143043	0.00207469	0	0.0017094	0.00366972	0.00484653	0.010101	0.0223577	0	0	0	NA	0	0.00860215	0	0	0.0212766	0.00242131	0.00180343	0.00377358	0.0137694	0	0.00223714	0.00606061	0	0.0131992	0.00883002	0	0.00115607	0.00951173	0.00535714	0	NA	NA	0	0.001	0.0074983	0.00996169	0.00378788	0	0	0	0	0.0178571
CpG_94	chr10	81431202	+	0.00423131	0	0	0.0164948	0.0364583	0	0.0238095	0	0.0120968	0.0141988	0.00210084	0.01875	0	NA	0.019432	0	0	0.0194265	0.012	0.00324939	0.011786	0	0.0128866	0	0.00223214	0.00706357	0.00666667	0.00627353	0.000734754	0	0.0109954	0.00755668	0.00475907	0.000840336	NA	NA	0	0.013986	0.00135962	0.00532319	0.0189394	0	0	0	0	0.0013708
CpG_95	chr10	81431220	+	0.0309423	0.0268595	0.0375162	0.0309278	0.0277778	0.00680272	0.0329068	0.0321027	0.0221774	0.0263692	0.039916	0.00155763	0.0434783	NA	0.0342772	0.0247046	0.00505689	0.0393773	0.0305851	0.0394208	0.0351035	0.0245283	0.0266323	0	0.0513393	0.0282543	0.0166667	0.0351317	0.0154185	0	0.00461627	0.0176322	0.0167064	0.02267	NA	NA	0	0.008	0.00614334	0.021309	0.0416667	0	0	0	0	0.0151307
CpG_96	chr10	81431223	+	0	0.00193798	0	0.003861	0	0.0298273	0.0017762	0	0	0.0343434	0	0	0.00172414	NA	0.0130246	0.00715746	0.0144058	0.0344531	0	0.0194553	0.0133452	0.021978	0.0184874	0	0	0.000996016	0	0.0106918	0.00286944	0.00122549	0.00563063	0.0132212	0.00800457	0.000812348	NA	NA	0	0	0.0112508	0.00810612	0	0	0	0	0	0.012008
CpG_97	chr10	81431233	+	0.0140746	0.0195865	0.00517799	0	0.0268631	0	0	0.000802568	0.00707071	0	0	0.0233645	0.00094697	NA	0	0	0.0145662	0.0119157	0.00806452	0.00886739	0.0171558	0.00094697	0.00951146	0	0	0.0101112	0.00167364	0.000634518	0.000368053	0.000621891	0.00321168	0.000633312	0.00626118	0	NA	NA	0	0.000501002	0.0010211	0.00229533	0	0.00609756	0	0	0	0.00761773
CpG_98	chr10	81431237	+	0.0248051	0.0248963	0.035668	0	0.000881057	0.0444065	0.000923361	0.0169355	0.00405268	0	0.00528541	0	0.012334	NA	0	0.00161812	0.0267516	0	0.00867245	0.0089322	0.00729927	0.0398104	0.0173536	0	0	0	0.00503356	0.0221309	0.00110988	0.0119572	0.00378017	0.000317561	0.0090307	0.0155987	NA	NA	0	0	0.00205198	0.00918836	0	0	0	0	0	0.0189003
CpG_99	chr10	81431277	+	0.0183357	0.00413223	0.00258398	0.00206186	0.03125	0.0272572	0.0490566	0.0192616	0	0.0304878	0.0168421	0.00155763	0	NA	0.00149254	0.0246781	0.00758534	0.0119157	0.00265957	0.00724055	0.018936	0.00376648	0.010327	0	0.0357942	0	0.015	0.00188324	0	0	0.00520231	0.00570704	0.00834824	0.00252101	NA	NA	0	0.003	0.00747791	0.026616	0	0	0	0	0.0269058	0
CpG_100	chr10	81431289	+	0.00987306	0.00414938	0.00648508	0.0226804	0.0191638	0.0334507	0.00184502	0.0192616	0.030303	0.0426829	0	0	0.0226843	NA	0.00896861	0.0118026	0.0304183	0	0.00669344	0.00965406	0.0387737	0	0.0301205	0	0.098434	0.00808081	0	0.0156937	0.00367377	0.0360697	0.0243478	0.0182965	0	0.0135021	NA	NA	0	0.00505561	0.01843	0.0137405	0	0	0	0	0	0.0178204
CpG_101	chr10	81433653	+	0.175134	0.388544	0.429592	0.195951	0.322889	0.221496	0.352498	0.165804	0.392545	0.211265	0.43505	0.23033	0.420143	0.21527	0.426387	0.204254	0.422957	0.202829	0.39843	0.42239	0.441616	0.457925	0.443334	0.484761	0.482319	0.324879	0.287362	0.25647	0.242936	0.279242	0.198485	0.382176	0.443009	0.434119	0	0.270303	0.249857	0.388431	0.438704	0.411989	0.490405	0.455274	0.451479	0.194495	0.198914	0.200196
CpG_102	chr10	81433676	+	0.122733	0.268166	0.330423	0.142774	0.218047	0.146951	0.245359	0.111015	0.266757	0.129747	0.340376	0.156933	0.314004	0.203832	0.313191	0.148742	0.311457	0.142502	0.277176	0.304289	0.342188	0.360867	0.325062	0.321377	0.357636	0.226407	0.194004	0.172653	0.17018	0.204912	0.139526	0.257438	0.330824	0.321389	0	0.135201	0.194165	0.269261	0.312656	0.317027	0.358461	0.328904	0.381853	0.130643	0.178968	0.141965
CpG_103	chr10	81433702	+	0.235758	0.568053	0.611136	0.263166	0.537033	0.290637	0.548873	0.237545	0.595166	0.29085	0.579878	0.326532	0.605846	0.296966	0.598979	0.274636	0.612674	0.299422	0.579726	0.591431	0.631887	0.653709	0.633117	0.650451	0.670304	0.419401	0.381254	0.33819	0.349052	0.377369	0.294386	0.591043	0.634746	0.620503	0.00862069	0.360366	0.343301	0.570945	0.601499	0.604914	0.647993	0.59586	0.643235	0.295766	0.343205	0.29739
CpG_104	chr10	81433720	+	0.11113	0.24413	0.307717	0.123146	0.182974	0.131195	0.234516	0.102412	0.241114	0.130029	0.304124	0.149601	0.287053	0.163309	0.295313	0.131396	0.274604	0.125369	0.243473	0.265597	0.309177	0.311295	0.283024	0.267362	0.324552	0.2002	0.179273	0.156993	0.157259	0.184973	0.12167	0.211875	0.298548	0.289446	0	0.0800971	0.153011	0.24709	0.271419	0.276659	0.342544	0.283726	0.362795	0.115494	0.136167	0.128037
CpG_105	chr10	81433726	+	0.127843	0.266545	0.336068	0.143646	0.219728	0.148536	0.251126	0.108513	0.274439	0.140465	0.340495	0.164281	0.304078	0.160999	0.309568	0.148475	0.297766	0.136809	0.256018	0.294549	0.336219	0.351031	0.320206	0.294238	0.365235	0.227815	0.201866	0.17378	0.175029	0.198071	0.138908	0.244822	0.319354	0.31422	0	0.0802432	0.193825	0.267371	0.292376	0.292148	0.341524	0.309304	0.401978	0.137804	0.167779	0.138286
CpG_106	chr10	81433737	+	0.119264	0.286029	0.34812	0.133304	0.226783	0.155144	0.258056	0.112483	0.2889	0.13992	0.350037	0.168637	0.342698	0.167377	0.330678	0.141543	0.316875	0.135997	0.288397	0.318372	0.35768	0.370084	0.345854	0.328378	0.377354	0.236257	0.206969	0.178587	0.173197	0.199761	0.137635	0.278811	0.347261	0.346969	0	0.111922	0.150229	0.296371	0.315987	0.321735	0.380826	0.328978	0.386196	0.127273	0.181399	0.136828
CpG_107	chr10	81433743	+	0.0928066	0.214782	0.257161	0.0987404	0.166327	0.100228	0.199339	0.0826132	0.235902	0.0924266	0.251121	0.123912	0.231481	0.11796	0.264816	0.103523	0.229399	0.0958146	0.212216	0.262809	0.251787	0.263204	0.27879	0.221298	0.273827	0.177942	0.148969	0.126582	0.139355	0.140846	0.101764	0.207494	0.259552	0.270673	0	0	0.148183	0.233302	0.275861	0.261016	0.269694	0.220386	0.229936	0.108808	0.113527	0.101218
CpG_108	chr10	81643243	+	0.00575837	0.00664612	0.00541527	0.00497963	0.0087524	0.0044292	0.00487536	0.00571234	0.00197368	0.00513377	0.00522521	0.00682941	0.00560307	0.000404204	0.0111892	0.0056461	0.00874117	0.00276593	0.00258398	0.00475686	0.00357277	0.00318499	0.00647629	0.0031081	0.00389233	0.00350375	0.00364327	0.0033129	0.00534904	0.0036236	0.00498582	0.00464744	0.00393595	0.00479585	0	0.000577701	0.00416368	0.00305831	0.00470415	0.00690805	0.00613613	0.00199166	0.00026591	0.00258714	0.00372603	0.00475851
CpG_109	chr10	81643291	+	0.0170108	0.00742657	0.0114157	0.0140129	0.0120399	0.0145263	0.0158018	0.00914232	0.0151295	0.0148508	0.0119386	0.00681826	0.00928236	0.0109734	0.0128033	0.00905897	0.0117076	0.011303	0.0138032	0.0150545	0.0163113	0.0189029	0.0114551	0.0116697	0.0110759	0.0136827	0.0100935	0.00711708	0.00968285	0.00972652	0.0104155	0.0151619	0.0164295	0.0110452	0	0.000292312	0.00717384	0.0117265	0.0125893	0.0115267	0.011533	0.0212531	0.0245437	0.0172714	0.0116629	0.0129411
CpG_110	chr10	81643298	+	0.00527526	0.00898061	0.00207542	0.00514264	0.000460299	0.0069878	0.00417708	0.00559997	0.00873948	0.00606357	0.00608593	0.00191696	0.00618033	0.000412371	0.00361882	0.0102946	0.0061714	0.00352042	0.0047867	0.00573974	0.00503906	0.00422252	0.00448812	0.000824274	0.0087647	0.00549845	0.00569558	0.00432595	0.00497211	0.00556687	0.00380167	0.00462608	0.00568831	0.00385901	0	0	0.000192585	0.00488218	0.00555118	0.00444835	0.0103104	0.000906293	0.00115952	0.0113972	0.0142047	0.00564863
CpG_111	chr10	81643315	+	0.00429359	0.00673077	0.00524696	0.0051665	0.00442921	0.004694	0.00790112	0.00393474	0.00408148	0.00647027	0.00459284	0.00359308	0.00267801	0.000406587	0.00172906	0.00561177	0.00747844	0.00499971	0.00423152	0.00407835	0.00352793	0.00389058	0.00316678	0.00540961	0.00297429	0.0043342	0.00702435	0.0043078	0.00453776	0.0040108	0.00297134	0.00330896	0.00570423	0.00490166	0	0.000291886	0.000217339	0.00445179	0.00404574	0.00506628	0.00510611	0.00514256	0.000223374	0.00686005	0.000358642	0.00471535
CpG_112	chr10	81643331	+	0.00573935	0.00325017	0.00391561	0.00323187	0.00799447	0.00937567	0.00295904	0.00479535	0.00877766	0.00734574	0.00712663	0.00390908	0.00271181	0	0.00603865	0.00532099	0.00342697	0.00611848	0.00552432	0.00717259	0.00458897	0.00430315	0.00467444	0.00352944	0.00636929	0.00585415	0.00527038	0.0046813	0.00438219	0.00534208	0.00541634	0.00538979	0.00383181	0.00569273	0	0.000580383	0.00814379	0.00531527	0.00420211	0.00725013	0.00580569	0.00342995	0.00560399	0.00807709	0.0108385	0.00466003
CpG_113	chr10	81643336	+	0.00903582	0.00650407	0.00834111	0.00757689	0.00322111	0.00745104	0.0100381	0.00795523	0.00754389	0.0101632	0.00854437	0.00202371	0.00344247	0	0.0118955	0.00497916	0.00854878	0.00280064	0.0064983	0.00797037	0.00846738	0.00901813	0.00732276	0.017795	0.0069707	0.00526157	0.00378261	0.00481811	0.00503932	0.00755175	0.00454732	0.00443822	0.00755291	0.00500566	0	0.0452962	0.00459924	0.00671477	0.00610007	0.00707961	0.00870223	0.00838819	0.00728048	0.0024933	0.00907874	0.00722456
CpG_114	chr10	81643360	+	0.00553175	0.00573449	0.00327524	0.00292925	0.00153468	0.00205615	0.00241678	0.00768246	0.0045895	0.00342633	0.00319127	0.000940598	0.00557348	0.000404204	0.00154985	0.00312085	0.00238268	0.00519911	0.0049717	0.00353787	0.0045045	0.00342342	0.00425618	0.000284894	0.00528211	0.00367397	0.00335059	0.00235259	0.0038187	0.00406708	0.00218557	0.00266627	0.00286199	0.00389491	0	0	0.00172637	0.00277487	0.00390008	0.00406003	0.00120348	0.00390566	0.013968	0.00014109	0.00184162	0.0025754
CpG_115	chr10	118049418	+	0.206199	0.441433	0.45948	0.199669	0.410728	0.245897	0.376735	0.202213	0.401059	0.227812	0.451033	0.245165	0.430152	0.264331	0.425752	0.22246	0.419436	0.271276	0.435096	0.368668	0.412713	0.403349	0.429416	0.311184	0.432053	0.314688	0.242716	0.253299	0.261258	0.273776	0.198475	0.437525	0.472233	0.39953	1	0	0.43152	0.395595	0.411793	0.43966	0.472242	0.379529	0.414258	0.202465	0.244021	0.223342
CpG_116	chr10	118049447	+	0.149852	0.438832	0.433481	0.119927	0.373167	0.191383	0.347731	0.174147	0.370061	0.222501	0.422934	0.227492	0.389742	0.267516	0.401638	0.199253	0.424325	0.237374	0.411122	0.368593	0.380881	0.373102	0.376817	0.219569	0.386449	0.265863	0.206918	0.208205	0.21194	0.189534	0.173388	0.413577	0.439257	0.375643	0	0.66055	0.437148	0.365396	0.406934	0.41444	0.437227	0.363126	0.572254	0.223592	0.229004	0.197734
CpG_117	chr10	118049530	+	0.18158	0.454964	0.476923	0.166917	0.390109	0.241472	0.399652	0.193697	0.41072	0.26409	0.452826	0.255851	0.393977	0.265372	0.425899	0.224446	0.42854	0.271336	0.441714	0.38726	0.423113	0.411749	0.432722	0.306604	0.437489	0.322856	0.24353	0.244909	0.235509	0.240591	0.192088	0.436866	0.480393	0.402473	1	0.654206	0.567079	0.388366	0.434609	0.461682	0.492128	0.364221	0.411306	0.230701	0.262537	0.212251
CpG_118	chr10	118049534	+	0.113953	0.398489	0.419302	0.115665	0.327797	0.183715	0.327233	0.136755	0.345633	0.189886	0.421577	0.217571	0.357726	0.214058	0.374249	0.17809	0.388166	0.216198	0.388707	0.334267	0.361677	0.330224	0.377011	0.201689	0.339629	0.240478	0.182533	0.178366	0.184769	0.168952	0.153685	0.385486	0.427796	0.350785	0	0.663636	0.532895	0.349014	0.376267	0.400415	0.42732	0.381968	0.378378	0.24735	0.276908	0.172789
CpG_119	chr10	118049538	+	0.0823055	0.347448	0.359519	0.0804579	0.256803	0.144265	0.281858	0.102571	0.279066	0.140198	0.347104	0.157407	0.315733	0.194888	0.331817	0.121761	0.315594	0.149854	0.333371	0.265467	0.301928	0.293375	0.31905	0.168233	0.297975	0.203245	0.142115	0.137434	0.133304	0.132995	0.10405	0.307081	0.36246	0.296721	0	0.663636	0.495256	0.293605	0.331077	0.34805	0.386716	0.311136	0.165692	0.255565	0.162985	0.131358
CpG_120	chr10	121150426	+	0.933916	0.977636	0.922181	0.901515	0.961585	0.905512	0.951773	0.884336	0.915113	0.924739	0.946097	0.955282	0.959087	0.763441	0.95664	0.911795	0.890957	0.958691	0.930738	0.930545	0.961275	0.951846	0.949282	0.886289	0.947106	0.938126	0.915379	0.918422	0.90978	0.900692	0.930195	0.940113	0.947735	0.937967	1	0.914127	0.960784	0.94743	0.923823	0.942329	0.951374	0.970854	1	0.923222	0.96228	0.939581
CpG_121	chr10	121150427	-	0.914758	0.945922	0.933198	0.922142	0.952446	0.92674	0.933649	0.909064	0.946392	0.936952	0.932237	0.93694	0.936468	1	0.944067	0.930376	0.929555	0.940536	0.958333	0.941104	0.941385	0.94091	0.935964	0.932373	0.937984	0.926807	0.91686	0.921061	0.903465	0.927901	0.925625	0.940508	0.951108	0.931355	1	1	0.999307	0.951251	0.96042	0.934728	0.922336	0.956302	0.951531	0.93406	0.999095	0.916952
CpG_122	chr10	121150433	+	0.815948	0.917928	0.926471	0.887205	0.915468	0.851181	0.946137	0.90813	0.933073	0.883982	0.942379	0.849644	0.917453	0.910906	0.922817	0.904588	0.912755	0.890612	0.888271	0.91636	0.914338	0.920518	0.894459	0.886581	0.908139	0.88878	0.916928	0.88859	0.877217	0.889034	0.878204	0.910031	0.919828	0.948464	1	1	0.875327	0.930062	0.910966	0.920317	0.926709	0.898378	0.940452	0.989342	0.919006	0.876082
CpG_123	chr10	121150434	-	0.867161	0.917203	0.909039	0.884743	0.943597	0.888134	0.913003	0.901978	0.940228	0.89411	0.908914	0.902247	0.930874	0.943627	0.921198	0.876365	0.89303	0.9217	0.940058	0.909031	0.899565	0.909969	0.91762	0.952381	0.927643	0.894952	0.896421	0.906178	0.889464	0.883471	0.88283	0.916033	0.921382	0.927256	1	1	0.826594	0.921079	0.929143	0.928988	0.924505	0.875044	1	0.961517	0.94591	0.884939
CpG_124	chr10	121150445	+	0.973785	0.996815	0.983466	0.973906	0.965207	0.9653	0.946581	0.974189	0.974903	0.965748	0.956198	0.96954	0.981117	0.930876	0.989831	0.966093	0.963685	0.942834	0.975659	0.965263	0.969705	0.968244	0.97654	0.985168	0.967548	0.963261	0.963262	0.961033	0.972968	0.962077	0.960545	0.955091	0.971863	0.972918	0.977778	0.814404	1	0.963887	0.968705	0.976217	0.974969	0.955656	1	0.988095	0.995928	0.96364
CpG_125	chr10	121150446	-	0.966865	0.983233	0.973171	0.937363	0.97053	0.973872	0.962758	0.954239	0.967344	0.982433	0.971694	0.968684	0.971314	0.997543	0.954046	0.964331	0.981698	0.972228	0.977256	0.970822	0.964174	0.962621	0.967072	0.986354	0.978511	0.971024	0.959559	0.955768	0.960978	0.959808	0.969007	0.966697	0.964114	0.968796	1	1	0.892539	0.955534	0.96974	0.972835	0.984781	0.972291	0.952081	0.99547	0.998656	0.955549
CpG_126	chr10	121150450	+	0.962316	0.94586	0.979804	0.976411	0.990402	0.957447	0.957507	0.905423	0.951157	0.954512	0.976787	0.965495	0.981904	0.938462	0.986468	0.950469	0.980071	0.9804	0.951972	0.980274	0.970766	0.968453	0.971563	0.966051	0.967202	0.975835	0.988802	0.986063	0.96281	0.969859	0.978727	0.96922	0.97576	0.971706	1	1	0.989978	0.987955	0.974776	0.971158	0.972697	0.985626	0.953425	0.991225	0.968261	0.972286
CpG_127	chr10	121150451	-	0.981714	0.971971	0.952597	0.963235	0.982701	0.963571	0.968643	0.958956	0.982245	0.967331	0.968627	0.954655	0.951923	0.968059	0.967525	0.960546	0.961733	0.967087	0.969813	0.960502	0.95547	0.965364	0.961609	0.968988	0.964379	0.962976	0.964232	0.968642	0.951502	0.966724	0.96447	0.965797	0.964031	0.970006	1	0.461538	0.997948	0.975329	0.973824	0.964872	0.957417	0.972311	0.997484	0.99548	0.948214	0.969457
CpG_128	chr10	121150478	+	0.8196	0.900279	0.888514	0.843353	0.917746	0.799842	0.919986	0.843501	0.881252	0.839806	0.924546	0.931818	0.885388	0.893436	0.922267	0.86478	0.924428	0.885404	0.91076	0.92401	0.88981	0.887761	0.882545	0.862316	0.912095	0.877176	0.841992	0.835206	0.834668	0.842011	0.820891	0.903924	0.898753	0.903884	1	0.810127	0.813439	0.879369	0.895572	0.927957	0.948709	0.966757	0.94456	0.913864	0.84718	0.849844
CpG_129	chr10	121150479	-	0.822788	0.876205	0.91511	0.837477	0.916294	0.868369	0.912064	0.850059	0.907349	0.883241	0.918288	0.862878	0.923255	0.99754	0.933399	0.881982	0.924083	0.908262	0.920703	0.92364	0.922589	0.898959	0.893979	0.890614	0.908674	0.870968	0.839537	0.858836	0.848563	0.859646	0.824584	0.916392	0.910717	0.929174	1	0.984848	0.776679	0.916538	0.923891	0.923027	0.928644	0.864088	0.997484	0.895539	0.884924	0.873696
CpG_130	chr10	121150495	+	0.792057	0.940191	0.858421	0.81335	0.91609	0.856295	0.92532	0.880478	0.890358	0.849458	0.901494	0.897727	0.922468	0.890347	0.934465	0.924869	0.916	0.928249	0.923136	0.921377	0.907144	0.935182	0.9009	0.921328	0.908409	0.862726	0.856548	0.880736	0.881237	0.85479	0.868303	0.914323	0.939862	0.944879	1	0.815385	0.95307	0.933964	0.896779	0.920324	0.918284	0.945547	0.780496	0.87983	0.900108	0.848832
CpG_131	chr10	121150496	-	0.863859	0.891169	0.925986	0.851688	0.922595	0.896107	0.925968	0.883507	0.908536	0.918406	0.923722	0.886627	0.938935	0.92238	0.894824	0.912688	0.918426	0.918693	0.937086	0.912804	0.917386	0.926831	0.922611	0.911918	0.944243	0.88013	0.884536	0.870957	0.885256	0.874892	0.863154	0.914062	0.91847	0.925247	0	1	0.734606	0.920231	0.923326	0.91884	0.920889	0.933359	0.78822	0.918063	0.92464	0.885013
CpG_132	chr10	121150526	+	0.752877	0.933706	0.874079	0.762511	0.846803	0.833729	0.844239	0.714665	0.817947	0.830965	0.883396	0.833442	0.810277	0.779661	0.878314	0.865204	0.831626	0.836072	0.858236	0.874272	0.799098	0.877964	0.837718	0.82698	0.867716	0.77949	0.749437	0.791161	0.760159	0.724924	0.767186	0.847025	0.86891	0.860276	1	0.651811	0.761109	0.863516	0.862716	0.887436	0.909607	0.822604	0.877663	0.816977	0.845838	0.794887
CpG_133	chr10	121150527	-	0.771469	0.831768	0.866441	0.789744	0.870627	0.834322	0.893022	0.823855	0.859567	0.842037	0.856515	0.841079	0.871235	0.884804	0.841777	0.852327	0.865001	0.805637	0.8733	0.86294	0.842144	0.875457	0.858579	0.812246	0.897667	0.828525	0.790584	0.806688	0.779324	0.821088	0.781443	0.850507	0.86232	0.874651	1	1	0.746259	0.873312	0.871632	0.886647	0.882908	0.884615	1	0.899944	0.861579	0.823145
CpG_134	chr10	121150535	+	0.582825	0.84571	0.809643	0.646341	0.856527	0.704509	0.850474	0.677441	0.843189	0.71374	0.834608	0.667774	0.82834	0.858491	0.831933	0.71672	0.799365	0.760338	0.838342	0.810285	0.780756	0.821743	0.824232	0.841611	0.827352	0.708921	0.684869	0.648974	0.691326	0.675464	0.67453	0.819438	0.838434	0.812089	0.977778	0.584958	0.709292	0.81791	0.829929	0.825756	0.85947	0.819415	0.841777	0.68595	0.657969	0.690207
CpG_135	chr10	121150536	-	0.675622	0.790777	0.79075	0.673881	0.809366	0.772764	0.868389	0.69583	0.829893	0.77326	0.825158	0.742429	0.858067	0.85049	0.833139	0.753974	0.825887	0.734562	0.855705	0.824962	0.823216	0.824084	0.788165	0.791712	0.844458	0.722358	0.708552	0.677802	0.682231	0.709459	0.670088	0.80941	0.833268	0.831902	0	1	0.75119	0.816739	0.823624	0.854657	0.866037	0.891634	0.947434	0.80326	0.778074	0.734533
CpG_136	chr10	127326466	-	0	0.0121396	0.0188053	0.00592593	0.0214876	0	0	0	0.0159787	0.00782779	0.00441501	0	0	NA	0.0247934	0.00770077	0.0102421	0.0059761	0.00116009	0.0131984	0.0156431	0.00787402	0.00611354	0	0.0352564	0.0209351	0.0188889	0.00720396	0.00490196	0.0333333	0.00814941	0.00361129	0.0167464	0.00198151	0	NA	0	0.0133809	0.0113636	0	0.0509554	0	0	0.0588235	0	0.0061082
CpG_137	chr10	127326472	-	0.0677541	0.0487062	0.0391061	0.0672646	0.0283333	0.0145161	0.0479452	0.0158273	0.0279627	0.0355731	0.0953437	0.030303	0.00658979	NA	0.0216306	0.0233853	0.0178571	0.00704225	0.0234467	0.0375839	0.0408768	0.104523	0.0195209	0	0.19281	0.0615605	0.0726447	0.0419742	0.0183623	0.0797546	0.0310321	0.0509554	0.0336168	0.0661664	0	NA	0	0.0384968	0.0648347	0.0501427	0.207792	0.137143	0.0114943	0.0588235	0	0.0547153
CpG_138	chr10	127326476	-	0.0497512	0.04414	0.0177778	0.0296736	0.0297521	0.0144462	0.046133	0.00848656	0.0226064	0.0373281	0.0396476	0.0143084	0.00647249	NA	0.0166113	0.0198675	0.0205607	0.0218905	0.0140023	0.0317181	0.0542412	0.076999	0.0161996	0.0078125	0.154341	0.0587413	0.0344828	0.0284681	0.0191929	0.0472362	0.0286299	0.0345168	0.0279664	0.0510949	0	NA	0	0.0403226	0.0343511	0.0403714	0.11465	0.131868	0	0.0582524	0	0.0361184
CpG_139	chr10	127326482	-	0.00124688	0.0137195	0.0165929	0.0520833	0.0231788	0.0112	0.00136612	0.00283286	0.00932091	0.0156556	0.0132743	0.00796178	0.00969305	NA	0.00165017	0.0231533	0.0176744	0.00199203	0.0139211	0.0268368	0.0424419	0.0563241	0.0170678	0	0.106109	0.0237762	0.0312849	0.0266005	0.00698952	0.0645812	0.0147159	0.0231252	0.0167531	0.033887	0	NA	0	0.0232143	0.0312764	0.0290089	0.203822	0	0	0.0582524	0	0.0327654
CpG_140	chr10	127326487	-	0.0186335	0.0182927	0.0243902	0.019174	0.0362438	0	0.0216509	0.00566572	0.00133333	0.0155945	0.0200893	0.027027	0	NA	0	0.0241758	0.00652377	0.0039801	0.0162791	0.0127529	0.0287853	0.0138203	0.0104621	0	0.0512821	0.0286313	0.0688124	0.0197664	0.00930005	0.0382294	0.0190282	0.0256495	0.0207751	0.0455746	0	NA	0	0.0223614	0.0277544	0.0229469	0.089172	0	0	0.0588235	0	0.0169713
CpG_141	chr10	127326513	-	0.0407013	0.0337165	0.0389321	0.0492537	0.0266002	0.0112994	0.0576662	0.011396	0.0107023	0.0394867	0.0710322	0.0304243	0.0105519	NA	0.00333611	0.0348837	0.0332865	0.0135338	0.0356308	0.0356665	0.0514921	0.0978532	0.0234513	0	0.174757	0.0747005	0.0755355	0.0432296	0.0188352	0.0905816	0.0460639	0.041611	0.0235342	0.0715719	0	NA	0	0.049864	0.0608324	0.0412985	0.20418	0.131285	0	0.0597015	0	0.0527361
CpG_142	chr10	127326524	-	0.0504673	0.0495427	0.0322043	0.074239	0.0406977	0.0144346	0.0447761	0.0113636	0.0213476	0.047105	0.098234	0.0191083	0.0194332	NA	0.00332226	0.0247797	0.0298507	0.00799201	0.032634	0.0400177	0.0534884	0.124876	0.0285025	0	0.186196	0.0858444	0.0917226	0.0687627	0.0225583	0.0961538	0.0406699	0.0520145	0.0322775	0.0782198	0	NA	0	0.0595345	0.0592718	0.0582289	0.199681	0.129477	0	0.0585366	0	0.0575115
CpG_143	chr10	127326528	-	0.0783582	0.0479087	0.0376731	0.0810409	0.0181369	0.0128308	0.0569878	0.0240113	0.0274064	0.0528893	0.0882029	0.0111023	0.0097166	NA	0.0346535	0.034141	0.0470424	0.0224439	0.0354857	0.0350297	0.0674223	0.0975248	0.037191	0	0.269663	0.0695075	0.0696629	0.0459588	0.020649	0.103535	0.045068	0.0494624	0.0362145	0.0912409	0	NA	0	0.0475123	0.060152	0.0473504	0.202875	0.131868	0.176136	0.0585366	0	0.0627322
CpG_144	chr10	127326556	-	0.0534161	0.0561457	0.0430464	0.0578635	0.0280066	0.0128411	0.0444744	0.0253879	0.0145889	0.0331384	0.0660793	0.0190174	0.00806452	NA	0.0115321	0.0417582	0.0343547	0.0228856	0.0290023	0.0469093	0.0667434	0.108268	0.0331299	0	0.223642	0.071727	0.0536313	0.0435368	0.0190709	0.101406	0.0571525	0.060616	0.0389972	0.089769	0	NA	0	0.048976	0.0650168	0.0461292	0.203175	0.131148	0	0.0582524	0	0.0495007
CpG_145	chr10	127326560	-	0.0359801	0.0409712	0.0386313	0.0384615	0.0164745	0.016	0.0350404	0.0113154	0.0106101	0.0331384	0.061674	0.0160514	0.0180921	NA	0.00330033	0.0274725	0.0139535	0.0218688	0.0267131	0.0285463	0.0408516	0.0668633	0.0227273	0	0.178808	0.0646732	0.0742794	0.048474	0.0152185	0.0873494	0.0395671	0.0498034	0.0282531	0.0666227	0	NA	0	0.030276	0.049979	0.0289041	0.203175	0.131148	0	0.0582524	0	0.038595
CpG_146	chr10	127326566	-	0.0559006	0.0397554	0.0356347	0.0538922	0.0346535	0.00966184	0.0532787	0.011396	0.0199203	0.0379242	0.0770925	0.0254372	0.00807754	NA	0.00823723	0.0374449	0.0139665	0.0268924	0.0234192	0.0377358	0.0682475	0.0994094	0.0205509	0	0.172524	0.0646732	0.078714	0.0570274	0.0239492	0.0873494	0.0375762	0.0509198	0.0312125	0.0747664	0	NA	0	0.0703473	0.0490072	0.0443191	0.203175	0.131148	0	0.0582524	0	0.0503472
CpG_147	chr11	3160011	-	0.848731	0.687543	0.739529	0.852332	0.630695	0.801265	0.692867	0.81219	0.808733	0.774895	0.73408	0.795147	0.756757	1	0.728814	0.824869	0.736711	0.78429	0.674472	0.773456	0.728656	0.806583	0.796887	0.784074	0.791339	0.853358	0.820238	0.847732	0.831516	0.854982	0.831099	0.685075	0.711593	0.719301	NA	1	0.784974	0.666738	0.692027	0.750078	0.749363	0.680514	1	0.710526	0.756532	0.78186
CpG_148	chr11	3160027	-	0.677698	0.600275	0.618174	0.718734	0.545324	0.681938	0.56567	0.727232	0.707386	0.630802	0.634589	0.660317	0.696957	0.981481	0.635103	0.712137	0.604632	0.665648	0.573636	0.673397	0.644929	0.715648	0.706685	0.733538	0.701299	0.768687	0.743797	0.757485	0.733692	0.756694	0.718685	0.548603	0.624702	0.585267	NA	1	0.756477	0.569424	0.600635	0.626362	0.633436	0.699697	0.665049	0.634945	0.497041	0.653372
CpG_149	chr11	3160125	-	0.542462	0.522634	0.549585	0.570905	0.459071	0.527091	0.483636	0.565944	0.627599	0.519353	0.601257	0.621975	0.606189	0.963636	0.578821	0.644163	0.580681	0.614749	0.561409	0.616524	0.591225	0.600227	0.62998	0.807634	0.614478	0.652675	0.696889	0.656727	0.620532	0.637316	0.617647	0.511095	0.590059	0.578599	NA	1	0.451031	0.536864	0.536562	0.589347	0.570776	0.605105	0.674641	0.55418	0.636364	0.563684
CpG_150	chr11	22004679	+	0.529345	0.577739	0.549191	0.494196	0.562009	0.621359	0.543624	0.586364	0.592384	0.547779	0.57656	0.501188	0.478836	0.39726	0.476812	0.513839	0.528155	0.553668	0.542564	0.5536	0.525316	0.577512	0.579167	0.392902	0.618932	0.513579	0.520153	0.503511	0.494557	0.585443	0.517155	0.550573	0.58463	0.502352	0.0322581	1	0.640227	0.525066	0.550023	0.53185	0.605534	0.581633	0.68797	0.646316	0.596226	0.474055
CpG_151	chr11	22004681	+	0.404571	0.437168	0.45679	0.404362	0.480315	0.450843	0.489189	0.395455	0.451202	0.462687	0.517176	0.42497	0.38247	0.489796	0.403509	0.380435	0.473171	0.435521	0.475947	0.485836	0.443801	0.512536	0.457708	0.420051	0.560226	0.381069	0.398901	0.401253	0.388867	0.464011	0.375226	0.478174	0.494787	0.399148	0	1	0.481268	0.452082	0.445252	0.488392	0.529793	0.527936	0.650376	0.56962	0.449495	0.404076
CpG_152	chr11	22004695	+	0.396807	0.47585	0.480793	0.383959	0.495238	0.524544	0.51026	0.436848	0.497126	0.465847	0.509434	0.427021	0.437584	0.59589	0.456973	0.42203	0.476893	0.45814	0.434333	0.483611	0.456497	0.504583	0.508688	0.374517	0.556098	0.407377	0.444688	0.424394	0.419468	0.453054	0.404926	0.514014	0.517552	0.436105	0	0.0625	0.465517	0.467593	0.489051	0.486807	0.494819	0.50576	0.628788	0.56871	0.464377	0.394643
CpG_153	chr11	22004706	+	0.149373	0.196619	0.248916	0.150338	0.241297	0.202105	0.244595	0.210647	0.278607	0.182686	0.249292	0.224746	0.210561	0.260274	0.232234	0.142163	0.219608	0.185786	0.209254	0.246369	0.218914	0.253253	0.209518	0.208679	0.289902	0.212214	0.183864	0.181571	0.158541	0.204551	0.174946	0.226657	0.257007	0.231189	0	0	0.213773	0.191812	0.253133	0.211855	0.196365	0.310246	0.273585	0.313433	0.190567	0.186441
CpG_154	chr11	22004713	+	0.344281	0.44287	0.45516	0.379079	0.487805	0.498609	0.468185	0.409529	0.443262	0.431757	0.48433	0.423214	0.39521	0.482993	0.472384	0.385455	0.460565	0.404378	0.466393	0.476741	0.453298	0.503026	0.5003	0.366603	0.595024	0.402287	0.390827	0.385661	0.399022	0.452413	0.374163	0.513473	0.501191	0.432921	0	0.9375	0.408309	0.44173	0.463838	0.457709	0.514993	0.562356	0.643396	0.716402	0.376117	0.370354
CpG_155	chr11	22004721	+	0.151964	0.282783	0.274691	0.225188	0.256939	0.229749	0.254374	0.178653	0.294872	0.234086	0.299333	0.211251	0.228552	0.457045	0.274653	0.20073	0.281601	0.225782	0.269767	0.282515	0.26815	0.290785	0.27756	0.194605	0.441889	0.229755	0.18667	0.170199	0.188806	0.258704	0.205372	0.292832	0.286603	0.223208	0.532258	0.967742	0.237681	0.245264	0.25654	0.305802	0.237015	0.360885	0.48855	0.385684	0.258168	0.207763
CpG_156	chr11	22004724	+	0.135584	0.192857	0.274074	0.112876	0.248019	0.233939	0.222522	0.142288	0.248034	0.193724	0.203229	0.193066	0.177495	0.318493	0.210488	0.14034	0.231107	0.17092	0.234568	0.241667	0.205277	0.198741	0.217169	0.240051	0.343661	0.149023	0.165753	0.143719	0.15161	0.149043	0.145287	0.25	0.214269	0.201285	0.516129	0	0.12536	0.211258	0.188998	0.231107	0.248044	0.354131	0.229602	0.275789	0.208122	0.17132
CpG_157	chr11	22004734	+	0.255344	0.342986	0.348343	0.302306	0.360258	0.403123	0.380561	0.301163	0.429608	0.347318	0.477118	0.316333	0.340786	0.334483	0.388521	0.282382	0.402661	0.341951	0.397906	0.383711	0.336786	0.386453	0.364717	0.222075	0.461219	0.311629	0.263881	0.286845	0.26611	0.313894	0.260274	0.398098	0.405471	0.335668	0.540984	1	0.413235	0.359543	0.384258	0.39539	0.388594	0.409759	0.663443	0.578778	0.327531	0.32667
CpG_158	chr11	22004738	+	0.269406	0.407407	0.381988	0.318792	0.428232	0.447257	0.427414	0.330103	0.432644	0.348063	0.416346	0.348837	0.319249	0.279863	0.386598	0.323995	0.398234	0.356202	0.380879	0.419381	0.404692	0.39703	0.390207	0.254851	0.455967	0.324097	0.374965	0.330191	0.324867	0.351831	0.3144	0.409794	0.401437	0.369863	0.52459	0	0.30848	0.39753	0.412728	0.409829	0.441738	0.50961	0.563462	0.485623	0.387572	0.313174
CpG_159	chr11	22004742	+	0.456384	0.520796	0.49656	0.486005	0.513732	0.569088	0.567235	0.482958	0.546436	0.524432	0.553831	0.470122	0.492547	0.564014	0.512915	0.487956	0.5385	0.526747	0.527967	0.54069	0.498059	0.523763	0.509875	0.402887	0.57601	0.469298	0.487201	0.472546	0.472771	0.53266	0.448737	0.572092	0.580543	0.474042	0.533333	1	0.468148	0.493756	0.539468	0.550933	0.61299	0.580473	0.691552	0.603226	0.446475	0.489041
CpG_160	chr11	22004762	+	0.242356	0.317544	0.290954	0.231405	0.298273	0.317549	0.332443	0.23788	0.346968	0.279352	0.295113	0.243499	0.225464	0.452055	0.292086	0.258373	0.33593	0.293803	0.326531	0.315957	0.297483	0.288635	0.280142	0.264817	0.385668	0.212097	0.237966	0.232348	0.219606	0.219283	0.234748	0.332837	0.307331	0.277882	0	0.9375	0.167139	0.284777	0.28456	0.344902	0.314028	0.349887	0.359551	0.385744	0.301887	0.25307
CpG_161	chr11	24233940	-	0.899423	0.897194	0.873434	0.899172	0.909262	0.909805	0.87894	0.916891	0.895429	0.902434	0.911686	0.893653	0.882498	0.928453	0.898286	0.896365	0.898433	0.899124	0.908764	0.867427	0.867027	0.866013	0.863137	0.866522	0.803933	0.867822	0.885587	0.879048	0.863443	0.847545	0.864887	0.890614	0.895814	0.893918	1	0.842653	0.915951	0.906489	0.899236	0.894712	0.909344	0.89162	0.843652	0.903184	0.915812	0.885511
CpG_162	chr11	24233970	-	0.685137	0.721386	0.745568	0.670074	0.734847	0.721726	0.774687	0.715814	0.772193	0.685067	0.786093	0.706524	0.735131	0.638333	0.80089	0.679308	0.761201	0.720185	0.786655	0.717329	0.732305	0.716772	0.73162	0.653522	0.674653	0.68733	0.687722	0.674493	0.664122	0.649572	0.670959	0.751657	0.746982	0.735559	0.355932	0.795306	0.708054	0.760916	0.76429	0.742802	0.810324	0.748507	0.652092	0.687199	0.748581	0.696093
CpG_163	chr11	24234006	-	0.613013	0.716127	0.694148	0.573571	0.681194	0.651165	0.728409	0.606026	0.717842	0.609183	0.729975	0.61967	0.690325	0.582848	0.697922	0.612545	0.713793	0.631301	0.750125	0.67476	0.674642	0.671648	0.686194	0.574096	0.638102	0.601261	0.627171	0.591087	0.586865	0.563644	0.586961	0.699672	0.711205	0.704454	1	0.586117	0.718733	0.685224	0.70058	0.682003	0.729883	0.690863	0.705937	0.60492	0.639479	0.579166
CpG_164	chr11	24234048	-	0.558127	0.69109	0.657044	0.518655	0.680133	0.596468	0.666466	0.580422	0.678436	0.598411	0.699681	0.585855	0.671255	0.496678	0.683848	0.556356	0.67417	0.614701	0.71447	0.660732	0.644433	0.648014	0.654535	0.584272	0.608265	0.57139	0.564994	0.547278	0.546273	0.532714	0.539835	0.682994	0.675761	0.671142	1	0.635065	0.73452	0.687814	0.69084	0.668213	0.714766	0.671285	0.669782	0.622804	0.663482	0.566467
CpG_165	chr11	33200958	-	0.0229075	0	0.0127569	0.0124481	0.017316	0.0027027	0.0021978	0	0.0141718	0.00492611	0.0263473	0.0145051	0.00645682	0	0	0.00877193	0.0166234	0.00740284	0.0129403	0.00259585	0.00940919	0.00483905	0.00790514	0.0311377	0.000864553	0.000614156	0.00195963	0.00390004	0.00269906	0.00585774	0.00651303	0.00755884	0.0106534	0.008	0	0	0	0.00556793	0.0118334	0.00345035	0.00489796	0.0210668	0	0.0179211	0.000907853	0.0134959
CpG_166	chr11	33200990	-	0.0274823	0.0331412	0.0185053	0.0115304	0.0207877	0.0245902	0.00221976	0.00488759	0.0088968	0	0.00968523	0.0181347	0.0299838	0	0.0315985	0.00589102	0.0125654	0.00248911	0.0189366	0.0136546	0.0146962	0.00675533	0.00544503	0.0609168	0.0174064	0.00554443	0.0278814	0.0124982	0.0156532	0.0114324	0.0218598	0.0119522	0.00837939	0.0167235	0	0	0	0.0147684	0.0203578	0.013434	0.00686059	0.0297565	0	0	0.000455581	0.0121073
CpG_167	chr11	33200999	-	0.015859	0.00573066	0.00710732	0.0177824	0.00650054	0	0.00770077	0.0058651	0.00884956	0.00987654	0.00963855	0.000856898	0.00803859	0	0.00181984	0.00440205	0.00952381	0.020383	0.00648882	0.00462312	0.00613766	0.00889642	0.00733753	0.0287425	0	0.00460405	0.004516	0.00392499	0.00255064	0.00671028	0.00401606	0.00689417	0.0026738	0.0011919	0	0	0.0265277	0.0109448	0.00418605	0.0100555	0	0	0	0	0	0.0133659
CpG_168	chr11	33201007	-	0.00536193	0.0146413	0.0156139	0.0104822	0.0241228	0.00269906	0.00785634	0.0126336	0.00356506	0	0.0144058	0.00343938	0.00322581	0	0.0210623	0.00735294	0.00415369	0.00992556	0.0179727	0.009656	0.011194	0.00591216	0.0083647	0	0.00953482	0.0087841	0.0219823	0.0184539	0.0105485	0.0131468	0.0117391	0.015895	0.0103442	0.0204638	0	0.00684932	0.000473934	0.0183815	0.0183105	0.0183652	0.0392906	0.0288158	0	0.000597372	0.00136986	0.0184301
CpG_169	chr11	33201013	-	0.0169492	0.0171429	0.00921986	0.0488565	0.0206298	0.0163934	0.0102623	0.0205078	0.015165	0.0430504	0.00601685	0.0496575	0.0234818	0	0	0.0288248	0.0187696	0.00621504	0.018732	0.0225397	0.0105843	0.0327973	0.0103245	0	0.00870575	0.015063	0.0176678	0.0179091	0.0173402	0.0172326	0.0219706	0.0191743	0.0194782	0.00855578	0	0	0.000956023	0.0237562	0.0256767	0.0196078	0.0164069	0	0	0.0425659	0.053065	0.014788
CpG_170	chr11	33201018	-	0.0159858	0	0.0155807	0.0414079	0.05	0.032345	0.0396476	0.0745098	0.043088	0.0565111	0.0119617	0.011925	0.00802568	0	0.0374532	0.0278184	0.025	0.025894	0.031746	0.0203918	0.0359334	0.0272995	0.0103477	0	0.053992	0.0225885	0.0179969	0.025989	0.0289985	0.0201072	0.0206529	0.019244	0.027305	0.0389698	0	0	0.000943396	0.0463045	0.0218126	0.0195489	0.0309783	0.000894454	0	0.0357143	0.0526316	0.0237244
CpG_171	chr11	33201026	-	0.024735	0.039886	0.0599144	0.060166	0.034632	0.0788043	0.0263736	0.040619	0.0070922	0.113022	0.0386473	0.0715503	0.022508	0.103774	0.0890909	0.0409357	0.0446058	0.0604192	0.076259	0.0291301	0.0488656	0.0470391	0.0548173	0.0645933	0.0333717	0.0667279	0.0577223	0.0415225	0.0413297	0.0444519	0.0403333	0.048814	0.0407801	0.044023	0	0.0136986	0.090566	0.0596085	0.0407101	0.0466926	0.0489663	0.136852	0	0.0440476	0.0580762	0.0549415
CpG_172	chr11	45980794	-	0.00288739	0.00563557	0.0031617	0.00298686	0.009684	0.01375	0.00217391	0.00437445	0.00601852	0.0152257	0.0212888	0.00734282	0.00094518	0	0.0147446	0.012792	0.00999131	0.0109505	0.00875753	0.00480307	0.00442739	0.00743802	0.00262217	0	0.0103226	0.011491	0.0146453	0.00678497	0.0055176	0.011134	0.00693978	0.00738178	0.00831817	0.00974591	NA	0	0	0.0112749	0.0140056	0.00933258	0.00912548	0	0	0.00266667	0	0.00816131
CpG_173	chr11	45980798	-	0.00384615	0.0037594	0.00180505	0.0148633	0.00152594	0.00993172	0.00732759	0.00780572	0.00231374	0.0124392	0.00402994	0.0105119	0.00374707	0	0.000524384	0.00554631	0.00475162	0.00262812	0.00761283	0.00550766	0.00147145	0.0148576	0.00214695	0	0	0.00316092	0.00181571	0.00597868	0	0.0131959	0.00290373	0.0138281	0.00363731	0.00418264	NA	0	0	0.00347072	0.00138927	0.00760563	0.0175305	0	0	0	0	0.00718219
CpG_174	chr11	45980805	-	0.00383325	0.00250941	0.00225734	0.00593472	0.00101729	0.000626959	0.00733707	0.00390117	0.00786673	0.00759219	0.00692841	0.000915332	0.00374532	0	0.00261917	0.00443459	0.0012931	0.000877963	0.00434075	0.00120192	0.0032372	0.00578991	0.00477327	0	0.00774693	0.00229885	0.00909504	0.0025974	0.00766182	0.00783182	0.00178651	0.00484988	0.00312094	0.00278552	NA	0	0	0.00130321	0.000277778	0.00508618	0.00761035	0	0	0	0	0.00455964
CpG_175	chr11	45980814	-	0.00383142	0.00949367	0.000452694	0.00357569	0.00306435	0.00808458	0.000866551	0.00695955	0.0125933	0.0016269	0.0109636	0.00598527	0.0056391	0	0.00157233	0.00611791	0.00822511	0.00306883	0.00163666	0.00528084	0.003564	0.000412882	0.00525185	0.00289436	0.00131234	0.00719839	0.00182565	0.00312907	0.000789681	0.00868127	0.00268877	0.00509495	0.00833985	0.00734009	NA	0	0	0.00130492	0.00751043	0.00423131	0.0168067	0.0021692	0.00357143	0.0930851	0	0.00480077
CpG_176	chr11	45980834	-	0.0408752	0.0430141	0.0528584	0.0518938	0.0474359	0.0427991	0.0532352	0.0879097	0.0529617	0.0336043	0.0477707	0.0519689	0.0509674	0	0.0616114	0.048522	0.0327869	0.0601273	0.045677	0.0440735	0.0557851	0.0367144	0.0442299	0.0748547	0.0501132	0.0421826	0.0464375	0.0435122	0.0380915	0.0371901	0.04262	0.0539914	0.0405053	0.0366173	NA	0	0.00158983	0.0452272	0.0378936	0.052098	0.0834286	0	0	0.0265957	0.00478011	0.0849579
CpG_177	chr11	45980849	-	0.0513066	0.0467024	0.0556939	0.0604248	0.0445469	0.073589	0.0425624	0.0435161	0.0470643	0.0346521	0.0550725	0.0650819	0.0379538	0.0794393	0.0469657	0.0463558	0.0548569	0.066608	0.0535714	0.0482102	0.0611489	0.0477481	0.0477333	0.13202	0.0276963	0.0323282	0.0320055	0.066258	0.0455028	0.0449158	0.0420934	0.0430033	0.0455323	0.0598036	NA	0	0.0032	0.0775617	0.0577946	0.0760839	0.029604	0.0898138	0.00178571	0.235609	0.00287081	0.0790366
CpG_178	chr11	45980860	-	0.0513006	0.055078	0.0775547	0.0808625	0.0802248	0.07995	0.0677632	0.0735035	0.086926	0.0669206	0.0747528	0.0614782	0.0850813	0.0744186	0.0661726	0.0720872	0.0905931	0.0649923	0.0942623	0.0710568	0.0997924	0.0989975	0.0843836	0.0843636	0.0832789	0.0883714	0.0615138	0.0881968	0.114741	0.0894495	0.0588896	0.0642899	0.0860131	0.0729901	NA	0	0.0658106	0.118611	0.072557	0.105353	0.0851493	0.0010917	0	0.277108	0.124521	0.0808142
CpG_179	chr11	45980871	-	0.0546075	0.0686117	0.0810436	0.0406553	0.0672751	0.0759615	0.0961073	0.0670502	0.0736269	0.0526608	0.0694855	0.0666978	0.080355	0.368421	0.0678149	0.0664756	0.0858086	0.0504915	0.0856663	0.0790618	0.0774079	0.0992315	0.0560711	0.119451	0.0752916	0.0928729	0.05375	0.0755309	0.0656768	0.0705723	0.0751041	0.0625554	0.0561798	0.0873213	NA	0	0.0667838	0.120743	0.0881906	0.0993684	0.111862	0.105516	0.00199203	0	0.096875	0.0930539
CpG_180	chr11	45980877	-	0.0598745	0.0730939	0.0983082	0.0439759	0.0660816	0.0718301	0.0973067	0.0572052	0.0723285	0.0671764	0.0973193	0.0716597	0.0690307	0.314815	0.0760697	0.0543722	0.0609225	0.0397176	0.0676196	0.0797783	0.0707965	0.0885395	0.0647948	0.361516	0.099152	0.0883627	0.0725103	0.0714845	0.0755415	0.0828476	0.0495961	0.0641501	0.0592535	0.0664103	NA	0	0.00958466	0.115435	0.058296	0.102012	0.145802	0	0.057554	0.100796	0.00382409	0.0930793
CpG_181	chr11	45980882	-	0.193455	0.194707	0.158781	0.118603	0.157004	0.17625	0.190476	0.170009	0.195804	0.14037	0.151832	0.154201	0.186616	0.448598	0.151628	0.153587	0.16436	0.151809	0.178844	0.166183	0.199111	0.238887	0.17186	0.336232	0.19544	0.158689	0.16169	0.149215	0.177111	0.189447	0.15518	0.148812	0.17903	0.163802	NA	0	0.388535	0.201919	0.169927	0.226757	0.242748	0.204348	0.160142	0.287234	0.0438931	0.199275
CpG_182	chr11	45980891	-	0.154624	0.148172	0.149457	0.110448	0.140163	0.137328	0.157508	0.120382	0.1642	0.146448	0.133718	0.139118	0.139098	0.0841121	0.147059	0.126251	0.140449	0.13834	0.155604	0.152955	0.147493	0.189669	0.146539	0.272464	0.155195	0.133391	0.143967	0.121792	0.114806	0.159006	0.119731	0.131439	0.132442	0.116043	NA	0	0.0761905	0.182174	0.153156	0.178944	0.211289	0.0694143	0.141844	0.0159574	0.0801527	0.177676
CpG_183	chr11	45980898	-	0.156585	0.170433	0.173432	0.164929	0.130343	0.158199	0.1962	0.157498	0.194051	0.172241	0.152532	0.161184	0.189086	0.240385	0.16837	0.174958	0.174202	0.1645	0.178234	0.151063	0.178518	0.285655	0.180272	0.317716	0.236184	0.169118	0.226871	0.184358	0.167385	0.243617	0.174358	0.152558	0.196821	0.163229	NA	0	0.012945	0.215139	0.163056	0.211389	0.240188	0.353333	0.344086	0.105121	0.23062	0.202244
CpG_184	chr11	48845469	+	0.923688	0.909739	0.900696	0.882139	0.877035	0.911765	0.921852	0.882887	0.910631	0.904227	0.915199	0.879642	0.904468	0.9278	0.921847	0.892412	0.909121	0.89164	0.906194	0.88719	0.895504	0.918575	0.899788	0.917993	0.926025	0.882563	0.877252	0.850947	0.873805	0.886757	0.847419	0.903955	0.907793	0.927293	0.903498	0.854899	0.939051	0.925765	0.927379	0.918676	0.951306	0.928975	0.932065	0.924059	0.942538	0.91711
CpG_185	chr11	48845481	+	0.67911	0.773305	0.779871	0.704497	0.731112	0.671095	0.761238	0.711204	0.75913	0.711971	0.804927	0.699245	0.783649	0.884153	0.76862	0.735465	0.773742	0.685246	0.789839	0.766103	0.760215	0.7769	0.77213	0.815915	0.777464	0.705029	0.711741	0.709253	0.723573	0.743917	0.687253	0.796006	0.755546	0.761715	0.555901	0.59185	0.781625	0.777158	0.802842	0.763686	0.792984	0.84659	0.806535	0.779642	0.759437	0.723189
CpG_186	chr11	48845486	+	0.553829	0.639486	0.648187	0.558479	0.540113	0.492183	0.653259	0.484284	0.579753	0.568849	0.662406	0.543903	0.624612	0.602916	0.615843	0.544736	0.622061	0.526385	0.637572	0.622969	0.605276	0.630484	0.615939	0.763794	0.637734	0.558039	0.56252	0.529307	0.548776	0.575306	0.526413	0.624344	0.626575	0.627329	0.610603	0.489464	0.583285	0.613298	0.641295	0.633983	0.644014	0.753369	0.693791	0.668267	0.589402	0.53646
CpG_187	chr11	48845513	+	0.464649	0.465019	0.517338	0.476947	0.455957	0.429521	0.504603	0.445934	0.511588	0.495299	0.535562	0.440834	0.443243	0.512022	0.515125	0.491237	0.513035	0.459172	0.561545	0.488402	0.514493	0.491288	0.482248	0.590267	0.515102	0.44338	0.474186	0.445378	0.442547	0.466992	0.44154	0.527049	0.503721	0.508287	0.381212	0.384919	0.45211	0.505476	0.549568	0.513166	0.537099	0.604744	0.548852	0.556673	0.511024	0.479544
CpG_188	chr11	48845525	+	0.379854	0.480024	0.558527	0.456607	0.488412	0.419778	0.520813	0.454899	0.559514	0.473285	0.57893	0.427322	0.512378	0.395317	0.52548	0.411786	0.497198	0.425193	0.525692	0.504903	0.507721	0.490089	0.508193	0.601173	0.543161	0.413333	0.43812	0.423995	0.44786	0.457025	0.412909	0.507299	0.514392	0.507321	0.46894	0.431553	0.401488	0.515739	0.547324	0.507491	0.518108	0.563005	0.534833	0.484699	0.47668	0.44228
CpG_189	chr11	48845543	+	0.420726	0.531902	0.592627	0.445312	0.516347	0.44213	0.613669	0.438207	0.578298	0.488746	0.661852	0.480519	0.557054	0.443089	0.554432	0.446187	0.536617	0.45412	0.559267	0.514903	0.542076	0.534297	0.540791	0.596989	0.538444	0.418914	0.48537	0.425189	0.460591	0.47735	0.425428	0.557742	0.539864	0.525113	0.54678	0.377538	0.431942	0.531919	0.572789	0.549218	0.553449	0.566841	0.519955	0.482778	0.483422	0.465129
CpG_190	chr11	49978729	+	0.923545	0.9217	0.939205	0.92723	0.938756	0.911692	0.905571	0.898214	0.940157	0.95293	0.935844	0.927129	0.90304	0.533333	0.896801	0.915802	0.915501	0.925234	0.918901	0.935078	0.926362	0.926397	0.916259	0.915385	0.958386	0.921503	0.889001	0.911951	0.889839	0.937275	0.911223	0.928005	0.905908	0.915027	1	0.804598	0.926075	0.919216	0.941648	0.93076	0.964319	0.979906	0.92616	0.779557	0.947903	0.916329
CpG_191	chr11	54961685	-	0.671555	0.73861	0.754723	0.645346	0.775467	0.712933	0.760341	0.689495	0.776951	0.725144	0.727096	0.703798	0.740595	0.753682	0.734361	0.720924	0.731003	0.693864	0.76837	0.739811	0.759403	0.749153	0.708591	0.69781	0.754108	0.713319	0.682959	0.68832	0.697943	0.675203	0.669337	0.758075	0.723101	0.740984	0.731707	0.651038	0.652174	0.762584	0.750932	0.766838	0.752563	0.779994	0.737459	0.732431	0.73363	0.702068
CpG_192	chr11	54961691	-	0.543737	0.629032	0.654167	0.557155	0.681818	0.600871	0.64435	0.546364	0.67494	0.544404	0.624575	0.596234	0.619355	0.553279	0.675283	0.552338	0.635188	0.552288	0.668442	0.623737	0.644216	0.643296	0.607909	0.625715	0.621819	0.541032	0.544987	0.545279	0.555058	0.501589	0.539406	0.637238	0.622472	0.616264	0.666667	0.493077	0.507952	0.676501	0.639426	0.656186	0.600116	0.692647	0.639939	0.561627	0.557019	0.567153
CpG_193	chr11	54961737	-	0.842089	0.853306	0.860849	0.85082	0.880071	0.859681	0.841599	0.839535	0.88869	0.85255	0.859182	0.862514	0.841682	0.877559	0.874775	0.84695	0.851115	0.826026	0.893757	0.849189	0.850469	0.849179	0.838653	0.885786	0.853439	0.845569	0.842114	0.843298	0.827306	0.821331	0.846597	0.87317	0.857739	0.859113	0.993976	0.830326	0.787683	0.868224	0.858342	0.861884	0.857544	0.893179	0.86735	0.858922	0.833715	0.827578
CpG_194	chr11	57832738	-	0.151434	0.110886	0.079672	0.162678	0.10408	0.170508	0.0831719	0.157033	0.107376	0.140198	0.0898305	0.173598	0.102487	0.185349	0.123266	0.14252	0.103163	0.161115	0.115582	0.0990842	0.102322	0.129755	0.087561	0.138592	0.136647	0.120608	0.153528	0.166049	0.141364	0.150297	0.150859	0.10819	0.124912	0.131427	0	0.185059	0.183119	0.128683	0.0972717	0.110068	0.131949	0.1875	0.111146	0.215095	0.142876	0.152184
CpG_195	chr11	57832763	-	0.247214	0.147876	0.163423	0.233674	0.14931	0.245611	0.16374	0.282879	0.14133	0.22081	0.164593	0.227371	0.163124	0.203524	0.131169	0.234937	0.182448	0.247318	0.164051	0.126912	0.151377	0.16574	0.135037	0.176986	0.197081	0.200705	0.225386	0.218086	0.190864	0.233048	0.217399	0.159304	0.198217	0.175727	0.371859	0.20777	0.246851	0.183943	0.141092	0.179374	0.216078	0.185457	0.154672	0.270825	0.234937	0.210463
CpG_196	chr11	57832797	-	0.447291	0.304616	0.280373	0.459921	0.300875	0.405873	0.315786	0.46317	0.316035	0.444472	0.281053	0.426704	0.328087	0.302244	0.325749	0.42918	0.312266	0.413281	0.337526	0.287852	0.298735	0.374248	0.271755	0.237025	0.386798	0.386025	0.440133	0.420407	0.36455	0.438804	0.4005	0.312477	0.361401	0.342592	0.184343	0.456245	0.394436	0.325376	0.27895	0.309471	0.405103	0.447718	0.383992	0.42468	0.459282	0.38785
CpG_197	chr11	57832806	-	0.402261	0.233361	0.234282	0.424782	0.23169	0.39283	0.26469	0.443446	0.278188	0.380571	0.245788	0.365979	0.260641	0.337467	0.242933	0.377594	0.275358	0.363156	0.28121	0.229908	0.238068	0.29687	0.217285	0.311784	0.314515	0.333844	0.379734	0.394147	0.332292	0.388069	0.368756	0.264187	0.296096	0.29582	0.553247	0.271012	0.353356	0.272189	0.226952	0.264327	0.376145	0.236022	0.346916	0.403356	0.411551	0.323376
CpG_198	chr11	57832815	-	0.320499	0.178959	0.182395	0.340659	0.205584	0.307199	0.205825	0.384358	0.218885	0.336506	0.223478	0.293453	0.206165	0.262093	0.215981	0.309896	0.227919	0.295922	0.203315	0.179659	0.185734	0.248378	0.171023	0.188993	0.27157	0.264813	0.3063	0.303224	0.25191	0.307164	0.272765	0.223792	0.234065	0.208625	0.38191	0.462838	0.291072	0.234854	0.185659	0.211787	0.293163	0.256492	0.222327	0.347834	0.331798	0.273886
CpG_199	chr11	57832818	-	0.377095	0.257148	0.233676	0.378754	0.25197	0.363529	0.249487	0.449784	0.248393	0.3699	0.267582	0.351765	0.259017	0.347711	0.259807	0.345266	0.251207	0.331402	0.258372	0.230903	0.233104	0.268605	0.218549	0.293328	0.318343	0.330966	0.333493	0.364276	0.298618	0.378422	0.358414	0.248636	0.286055	0.274991	0	0.27027	0.400967	0.27157	0.219571	0.254262	0.32519	0.296273	0.277025	0.427915	0.33864	0.316045
CpG_200	chr11	57832837	-	0.685241	0.530552	0.53605	0.687156	0.573271	0.686637	0.510448	0.706366	0.552321	0.664885	0.557	0.684774	0.55002	0.629174	0.538374	0.670566	0.573161	0.626765	0.556637	0.542301	0.579855	0.597779	0.532953	0.526669	0.645702	0.632039	0.64568	0.661414	0.629987	0.701192	0.649314	0.558802	0.568592	0.570851	1	0.626689	0.740266	0.591789	0.530646	0.551769	0.605605	0.613473	0.678853	0.718606	0.753398	0.625357
CpG_201	chr11	57832850	-	0.49333	0.318399	0.343444	0.543358	0.367344	0.50884	0.358146	0.542901	0.384814	0.48399	0.352553	0.487554	0.382656	0.524605	0.354155	0.491236	0.369015	0.461365	0.399675	0.349416	0.378663	0.424806	0.315264	0.367518	0.460762	0.423677	0.50537	0.497799	0.453645	0.497588	0.463996	0.387629	0.405631	0.403003	1	0.619932	0.481365	0.39645	0.361925	0.372592	0.483528	0.478261	0.511041	0.577718	0.569605	0.461143
CpG_202	chr11	57832853	-	0.388029	0.274903	0.240591	0.409186	0.234176	0.386325	0.257889	0.383468	0.266585	0.370574	0.243279	0.368133	0.252373	0.470951	0.244248	0.377917	0.259943	0.358165	0.257103	0.238932	0.223113	0.291632	0.217829	0.247761	0.319513	0.34192	0.383944	0.383031	0.312085	0.389385	0.339329	0.254861	0.29207	0.2769	0.378788	0.481419	0.328893	0.264522	0.218677	0.288198	0.373795	0.308992	0.255594	0.46484	0.48314	0.365363
CpG_203	chr11	59284275	+	0.364357	0.571429	0.532152	0.373847	0.541513	0.369606	0.504557	0.425482	0.494347	0.436914	0.554162	0.40934	0.571192	0.440945	0.510706	0.382624	0.553423	0.439394	0.550127	0.520483	0.497526	0.563209	0.525449	0.5019	0.505678	0.439107	0.451054	0.371286	0.389453	0.400188	0.392783	0.524362	0.54582	0.535489	0.478747	0.471981	0.425457	0.513881	0.540044	0.541989	0.568109	0.588691	0.530106	0.43937	0.422716	0.400736
CpG_204	chr11	59284289	+	0.361025	0.551865	0.54321	0.300526	0.47991	0.429612	0.484195	0.419366	0.50644	0.391964	0.510632	0.380717	0.556944	0.436112	0.486635	0.387072	0.512173	0.4227	0.51213	0.506493	0.471927	0.541738	0.527468	0.475369	0.488619	0.418586	0.416765	0.348484	0.344798	0.366551	0.38217	0.493104	0.51717	0.497988	0.374011	0.39106	0.433959	0.515888	0.514584	0.519959	0.549898	0.521033	0.495285	0.405699	0.449942	0.363154
CpG_205	chr11	59284292	+	0.147171	0.31087	0.273423	0.153265	0.280885	0.211011	0.289768	0.17749	0.281158	0.200769	0.273352	0.200806	0.320457	0.187036	0.281642	0.18197	0.301878	0.21874	0.311945	0.275507	0.278473	0.332471	0.309651	0.285151	0.271576	0.215292	0.232078	0.167854	0.174099	0.175587	0.189395	0.274741	0.303863	0.300803	0.199549	0.152311	0.178987	0.301754	0.300383	0.277135	0.30413	0.347035	0.331265	0.190033	0.251955	0.204958
CpG_206	chr11	59284325	+	0.151462	0.294631	0.342986	0.135678	0.29826	0.186973	0.320342	0.211213	0.301302	0.187473	0.323152	0.14586	0.394934	0.201871	0.342968	0.184919	0.342471	0.215946	0.332301	0.308323	0.300496	0.371148	0.327547	0.330472	0.341732	0.231066	0.194909	0.17748	0.174243	0.195465	0.173726	0.301785	0.339188	0.316588	0.163494	0.145869	0.171125	0.307342	0.350546	0.329	0.376582	0.327083	0.315996	0.197443	0.249081	0.186836
CpG_207	chr11	59284339	+	0.447353	0.667391	0.704798	0.480252	0.671306	0.546992	0.667275	0.621667	0.662227	0.579172	0.628866	0.523618	0.709182	0.556548	0.606572	0.527735	0.690063	0.570919	0.683751	0.647687	0.629334	0.682827	0.643092	0.625534	0.585938	0.597394	0.569137	0.509568	0.512154	0.51666	0.537718	0.658533	0.675678	0.655698	0.469388	0.645712	0.604608	0.664055	0.668187	0.686855	0.694117	0.661528	0.699364	0.559132	0.563933	0.541213
CpG_208	chr11	59284350	+	0.194004	0.333695	0.391803	0.175158	0.306306	0.193624	0.313161	0.186662	0.355525	0.201027	0.339817	0.204022	0.36556	0.28233	0.389271	0.210743	0.343939	0.239009	0.383033	0.356237	0.337164	0.392761	0.385595	0.385829	0.336833	0.260574	0.255298	0.209619	0.205187	0.206616	0.202513	0.33042	0.386333	0.363709	0.231982	0.258704	0.260334	0.334899	0.365575	0.355563	0.380108	0.358313	0.328836	0.202435	0.255181	0.225971
CpG_209	chr11	59284352	+	0.198467	0.394336	0.421793	0.209175	0.345806	0.25364	0.410773	0.221257	0.383609	0.303289	0.387802	0.253759	0.441483	0.269497	0.369505	0.25676	0.413681	0.279589	0.41233	0.388308	0.391022	0.43445	0.44019	0.3691	0.373823	0.300218	0.264522	0.23794	0.243758	0.229775	0.246651	0.38701	0.424707	0.406689	0.286364	0.188413	0.23554	0.391938	0.415932	0.41253	0.444626	0.443164	0.417339	0.279275	0.275327	0.25832
CpG_210	chr11	59284355	+	0.110457	0.263617	0.261872	0.132576	0.265458	0.148585	0.278907	0.161528	0.244452	0.166453	0.266361	0.1427	0.248333	0.197824	0.242812	0.15072	0.245537	0.17169	0.278313	0.247428	0.266629	0.265221	0.294438	0.264968	0.257087	0.185042	0.169336	0.149451	0.147261	0.12969	0.135547	0.224076	0.27542	0.259935	0.0225225	0.077557	0.14046	0.2473	0.286082	0.259609	0.282159	0.24832	0.292503	0.164241	0.214329	0.167159
CpG_211	chr11	59284358	+	0.166863	0.39478	0.380306	0.157606	0.345507	0.273113	0.36217	0.227759	0.353713	0.25	0.378657	0.226208	0.370448	0.230159	0.351438	0.226852	0.370672	0.257079	0.379819	0.329581	0.359594	0.37954	0.392236	0.374661	0.358597	0.262995	0.262806	0.201933	0.204617	0.200759	0.205969	0.339708	0.402276	0.381332	0.239278	0.238653	0.20464	0.357295	0.38172	0.38085	0.406546	0.355929	0.390733	0.234494	0.261582	0.219539
CpG_212	chr11	62629418	-	0.448276	0.580902	0.60503	0.437352	0.650986	0.519784	0.614792	0.501048	0.628049	0.38087	0.553314	0.599174	0.608	NA	0.525939	0.520362	0.615819	0.488998	0.605198	0.562029	0.556657	0.434709	0.523264	0.706697	0.626816	0.513285	0.42126	0.437473	0.469953	0.443584	0.504812	0.631579	0.58966	0.559059	0	0.393443	0	0.556591	0.580709	0.588471	0.631313	0.871345	0.246073	0.213793	0.512085	0.447236
CpG_213	chr11	62629460	-	0.159836	0.170103	0.0964912	0.179601	0.111773	0.180243	0.167421	0.0807453	0.129713	0.156897	0.105114	0.0752033	0.142857	NA	0.176265	0.0845272	0.157489	0.134118	0.130852	0.102512	0.166434	0.106599	0.143362	0.219626	0.131435	0.111712	0.118348	0.11431	0.0811946	0.0776484	0.101661	0.12929	0.133333	0.142667	0	0.616667	0	0.200535	0.121748	0.176559	0.193286	0.0869565	0	0	0.234399	0.151697
CpG_214	chr11	62629466	-	0.354908	0.5	0.385258	0.470732	0.447205	0.330869	0.377389	0.189071	0.442368	0.367475	0.367013	0.317021	0.397279	NA	0.389341	0.24354	0.460924	0.419195	0.455003	0.335436	0.304923	0.354651	0.363403	0.438095	0.456657	0.284692	0.295207	0.285368	0.300797	0.278731	0.273837	0.43347	0.395804	0.419488	1	0.398305	0.00743494	0.399386	0.402158	0.452424	0.428277	0.334995	0.00276243	0.279152	0.326547	0.349103
CpG_215	chr11	62629474	-	0.14557	0.0778523	0.0840841	0.133011	0.0979183	0.10646	0.0989867	0.0853789	0.0817121	0.047491	0.112738	0.0588854	0.110204	NA	0.0585586	0.0707763	0.138165	0.128221	0.0680824	0.0660777	0.0968692	0.10118	0.134686	0.212048	0.109122	0.0587867	0.0752338	0.0836636	0.0850597	0.070568	0.0845915	0.0779412	0.0863724	0.0953917	0	0	0	0.0930632	0.103231	0.0974851	0.234896	0.207415	0	0	0	0.0655695
CpG_216	chr11	62629486	-	0.160528	0.19709	0.183976	0.130641	0.152968	0.103139	0.101642	0.1151	0.110425	0.133624	0.0920863	0.0907173	0.0712383	NA	0.108541	0.0887218	0.133744	0.185298	0.115718	0.126809	0.170827	0.123538	0.170953	0	0.103197	0.0973236	0.11781	0.0823479	0.0793201	0.0714286	0.11664	0.114902	0.147905	0.0790771	0	0	0.043956	0.10202	0.106499	0.113997	0.160525	0.0550098	0.363395	0	0.101141	0.133856
CpG_217	chr11	62629533	-	0.501385	0.547368	0.54062	0.347518	0.608169	0.541071	0.486154	0.480084	0.591743	0.396161	0.557471	0.42268	0.496689	NA	0.565836	0.417665	0.569196	0.476942	0.481436	0.481887	0.486601	0.447964	0.515	0.728538	0.464365	0.477396	0.42126	0.431489	0.410304	0.351545	0.4332	0.508945	0.532745	0.507535	0	0.393443	0.482014	0.507947	0.507367	0.536268	0.542714	0.523346	0.879581	0.458904	0.782477	0.448589
CpG_218	chr11	67667943	+	0.214323	0.273377	0.30349	0.234745	0.238126	0.171486	0.199142	0.201109	0.266795	0.200954	0.18865	0.233367	0.242004	0.194079	0.241634	0.186506	0.220654	0.145311	0.218987	0.266767	0.280739	0.342455	0.254588	0.315751	0.382899	0.235398	0.249534	0.166667	0.227638	0.243683	0.199474	0.194474	0.255826	0.267359	0.00806452	0.246649	0.357997	0.227585	0.248645	0.212148	0.276429	0.243549	0.209574	0.183691	0.196417	0.221199
CpG_219	chr11	67667970	+	0.208312	0.286789	0.28003	0.282772	0.27042	0.20424	0.277131	0.19894	0.33888	0.216621	0.252583	0.227284	0.282175	0.123762	0.237504	0.245092	0.242274	0.20621	0.250747	0.314549	0.340683	0.415689	0.314106	0.369443	0.412931	0.276288	0.256242	0.198606	0.249652	0.291922	0.215496	0.236075	0.285077	0.329929	0	0.329285	0.3059	0.253387	0.278719	0.268354	0.282551	0.219409	0.250866	0.241744	0.227371	0.226414
CpG_220	chr11	67667992	+	0.454092	0.504393	0.517853	0.467873	0.511734	0.424966	0.465173	0.477296	0.556731	0.502898	0.422665	0.583419	0.48625	0.480992	0.518079	0.515683	0.518088	0.522319	0.466839	0.525407	0.548172	0.633062	0.507023	0.543714	0.648332	0.523668	0.573466	0.456417	0.518714	0.599087	0.471321	0.473489	0.517249	0.524828	0	0.557201	0.542573	0.479607	0.507872	0.489096	0.513746	0.509374	0.555911	0.50444	0.558128	0.547925
CpG_221	chr11	67668015	+	0.412591	0.410273	0.451597	0.394753	0.371094	0.330405	0.345187	0.327943	0.431964	0.37176	0.364193	0.360185	0.398428	0.346535	0.432203	0.391777	0.381533	0.344391	0.366786	0.422301	0.421209	0.562828	0.415829	0.503901	0.520241	0.412057	0.448174	0.327947	0.403582	0.473272	0.364168	0.372291	0.414427	0.429164	0	0.231183	0.562735	0.370871	0.402281	0.376332	0.438474	0.451632	0.386667	0.429417	0.380826	0.393803
CpG_222	chr11	67668025	+	0.364535	0.380797	0.458312	0.419862	0.368387	0.36019	0.323493	0.376333	0.458953	0.355921	0.351767	0.435633	0.37037	0.291391	0.436364	0.365086	0.350177	0.351016	0.352729	0.413168	0.432868	0.53505	0.407563	0.5219	0.470335	0.416463	0.48022	0.354212	0.414808	0.495118	0.381522	0.356454	0.419927	0.425025	0.733333	0.547945	0.473982	0.361571	0.400168	0.350379	0.376542	0.346593	0.302787	0.355831	0.351089	0.390431
CpG_223	chr11	67668034	+	0.667538	0.575325	0.695785	0.711864	0.581213	0.642375	0.592365	0.70273	0.600257	0.607118	0.582822	0.70298	0.630974	0.95	0.662514	0.715175	0.614815	0.671923	0.641087	0.631513	0.651545	0.725629	0.629366	0.696881	0.759819	0.679947	0.76005	0.638771	0.666609	0.715114	0.671958	0.610338	0.680468	0.668829	0.741935	0.45283	0.743898	0.620013	0.670889	0.644309	0.695589	0.601456	0.753739	0.792125	0.561024	0.686247
CpG_224	chr11	71751597	-	0.00201816	0.00130039	0.00612245	0.00267738	0.00277521	0.00239234	0.00111607	0	0	0.0021645	0.00246914	0.00349345	0.00100301	0	0.00697906	0.000640205	0.00106781	0.00169587	0.00397351	0.00150294	0.00515215	0.0033312	0.00204499	0	0.00263158	0.00521153	0.00249743	0.002457	0.00272519	0.00264784	0.00113151	0.00244101	0.00372751	0.00102223	0	0	0	0.00244818	0.00238253	0.00231707	0.00100671	0.000280426	0	0.00571102	0.000362056	0.00148388
CpG_225	chr11	71751601	-	0.00607903	0.00260417	0.00715015	0	0.00369686	0.00598802	0.00668896	0.00254669	0.00274223	0.00755124	0.0037037	0	0	0	0	0.00642261	0.00904737	0.00395704	0.00198675	0.00301122	0.00564425	0.00256476	0.00263505	0.0125638	0.00319609	0.00614251	0.00602233	0.00410453	0.00301464	0.00942701	0.00516373	0.00312245	0.00462784	0.00562085	0	0	0	0.0029407	0.00424234	0.00598291	0.00134454	0.000557414	0	0	0.0108972	0.00148568
CpG_226	chr11	71751626	-	0.0136295	0.00260247	0.00356415	0.00401338	0.00278164	0.00600601	0.00671141	0.000424628	0.00457247	0.0107933	0.0037037	0.00568182	0.000501505	0.0621359	0.00998004	0.00416133	0.00133262	0.00339175	0	0.00327802	0.00595717	0.00480615	0.00468658	0.00862407	0.00253903	0.00199341	0.000440205	0.0043686	0.00222685	0.00595501	0.00346043	0.0023732	0.0053995	0.00459711	0	0	0.00827498	0.00163252	0.0049636	0.00482443	0.0023486	0.00683212	0.000784006	0.00085592	0.00435098	0.00290266
CpG_227	chr11	71751650	-	0.0101471	0.00130293	0.00616967	0.016129	0.012993	0.00120048	0.0112108	0.00767918	0.0155535	0.00434783	0.00372671	0.00702679	0.0050226	0	0.0170255	0.0102663	0.0131121	0.0119048	0.00863214	0.0112699	0.00857883	0.00934278	0.0154332	0.0206856	0.0146434	0.0135364	0.0082602	0.01241	0.00713102	0.00827974	0.0090181	0.00920057	0.0103326	0.00590235	0.358079	0.0407359	0.0012785	0.0101564	0.0105095	0.0106565	0.00690584	0.0037794	0.0169225	0.00544101	0.000364232	0.011605
CpG_228	chr11	71751657	-	0.0035479	0.000654022	0.00511509	0.00944669	0.00742804	0.00483384	0	0.000854701	0.0105601	0.0151351	0.00186335	0.00571429	0.00603622	0	0.02118	0.0128535	0.0109567	0.0133447	0.00466511	0.0102944	0.0106185	0.00463499	0.0122266	0.000590087	0.00897921	0.0102347	0.0101167	0.00919761	0.00835735	0.0106265	0.00909378	0.0104387	0.0119594	0.00949814	0	0.0771242	0.000637755	0.00766378	0.0117663	0.0115607	0.00740803	0.000419757	0	0.000573394	0.00911245	0.00883632
CpG_229	chr11	71751671	-	0.00962025	0.00261609	0.0103199	0.0174497	0.00419972	0.0272727	0.00674157	0.0072774	0.00555042	0.00868621	0.00743955	0.0101366	0.0136571	0	0.011523	0.0109536	0.0136437	0.0142288	0.00800534	0.0153249	0.0120964	0.0126185	0.0204324	0.0224876	0.0126969	0.0135546	0.00983973	0.0125485	0.0153251	0.0161928	0.0128262	0.0133067	0.0161859	0.0162765	0	0.001321	0.00537634	0.0149946	0.0157729	0.0123939	0.0186351	0.0176579	0.00241838	0.00348432	0.0151069	0.00966747
CpG_230	chr11	72411971	-	0.181432	0.193572	0.174109	0.143529	0.12071	0.152576	0.206213	0.161437	0.211477	0.220503	0.143439	0.153463	0.137672	0.252174	0.181024	0.102475	0.160766	0.14699	0.181053	0.12044	0.143819	0.140762	0.107062	0.126781	0.104488	0.130455	0.112788	0.117835	0.123179	0.126982	0.112014	0.144729	0.137107	0.156846	0.115486	0.210526	0.146739	0.164679	0.173996	0.15151	0.142513	0.168621	0.102717	0.128948	0.170568	0.160601
CpG_231	chr11	72411995	-	0.152381	0.167424	0.13024	0.118545	0.127824	0.142574	0.176587	0.171851	0.162975	0.149871	0.125101	0.127692	0.111596	0.146132	0.168025	0.125998	0.102652	0.128428	0.140705	0.127953	0.137958	0.13898	0.118146	0.123401	0.124986	0.143411	0.128344	0.117421	0.112203	0.151096	0.12383	0.139193	0.126928	0.117268	0	0	0.113836	0.0978442	0.135404	0.117771	0.133251	0.148722	0.164129	0.132923	0.124324	0.110332
CpG_232	chr11	72412000	-	0.0469657	0.0685544	0.0827558	0.0778689	0.109677	0.0860927	0.10495	0.0923389	0.126723	0.0661104	0.0591572	0.062531	0.0885287	0.126074	0.0991326	0.0854967	0.0522739	0.0625624	0.0663749	0.0862932	0.0789265	0.0862437	0.063008	0.0732132	0.0845233	0.0680485	0.0770891	0.0641458	0.0700806	0.0664934	0.0730522	0.072115	0.0782806	0.0748066	0	0.0862895	0.0566974	0.072362	0.0641422	0.0646133	0.0813409	0.0915115	0.0682231	0.0540649	0.110255	0.0616491
CpG_233	chr11	72412027	-	0.328437	0.29037	0.292683	0.311916	0.306075	0.284759	0.309746	0.322548	0.361522	0.333333	0.275081	0.249252	0.320497	0.354286	0.209418	0.323162	0.301877	0.298997	0.300801	0.293449	0.273613	0.294858	0.285762	0.319578	0.268694	0.273929	0.296882	0.278588	0.280782	0.256481	0.238312	0.294619	0.271328	0.277928	0	0.10076	0.247128	0.261166	0.2913	0.2779	0.24454	0.271538	0.364385	0.261526	0.250069	0.27625
CpG_234	chr11	75895108	+	0.366306	0.755529	0.742746	0.406075	0.790473	0.401851	0.83136	0.391968	0.815073	0.455816	0.78534	0.421451	0.793868	0.477887	0.793017	0.365888	0.759558	0.45607	0.782923	0.782013	0.789587	0.782315	0.773219	0.758468	0.825678	0.573808	0.489306	0.470897	0.483227	0.462464	0.429831	0.782485	0.785683	0.75055	0	0	0.493565	0.798402	0.788761	0.761698	0.766816	0.794841	0.555205	0.519164	0.619136	0.438741
CpG_235	chr11	75895130	+	0.329569	0.709902	0.679994	0.348149	0.769152	0.344822	0.751439	0.366205	0.723977	0.387684	0.727801	0.366443	0.755814	0.353015	0.732149	0.318473	0.727925	0.383107	0.701831	0.761386	0.748707	0.785631	0.76193	0.766637	0.805101	0.530535	0.434587	0.418775	0.439547	0.404088	0.395739	0.705844	0.758833	0.710164	0	0.321951	0.514143	0.71579	0.726682	0.7116	0.699995	0.699855	0.450122	0.452072	0.433264	0.36592
CpG_236	chr11	75895167	+	0.385921	0.781971	0.784558	0.402567	0.802574	0.422547	0.838957	0.420097	0.764157	0.478253	0.819481	0.41635	0.772972	0.474847	0.798679	0.402993	0.761235	0.461294	0.798593	0.803198	0.773604	0.809052	0.77974	0.773776	0.819728	0.569916	0.493878	0.470335	0.489019	0.456238	0.447953	0.793528	0.802254	0.7552	0	0.299065	0.549194	0.786109	0.793826	0.780028	0.769334	0.806757	0.620972	0.554429	0.589484	0.457167
CpG_237	chr11	75895182	+	0.220207	0.429089	0.512173	0.244113	0.564257	0.263018	0.55993	0.238933	0.504117	0.276296	0.510516	0.262218	0.584042	0.247232	0.54448	0.212041	0.572163	0.282696	0.507836	0.597452	0.545627	0.56882	0.526602	0.527668	0.624832	0.363004	0.322291	0.31207	0.299324	0.303277	0.291935	0.547246	0.565639	0.539869	0	0.317757	0.284837	0.510308	0.545014	0.536162	0.502002	0.605369	0.417419	0.299824	0.339047	0.268162
CpG_238	chr11	75895187	+	0.490012	0.798788	0.81919	0.508099	0.834835	0.515031	0.853214	0.509194	0.821213	0.579545	0.839943	0.50569	0.86181	0.575646	0.853615	0.497762	0.841668	0.584335	0.822943	0.860469	0.844554	0.857402	0.839619	0.859363	0.873011	0.657996	0.590106	0.582144	0.578311	0.572521	0.568709	0.835426	0.849016	0.825223	0	0.317757	0.670337	0.854578	0.846579	0.837485	0.828291	0.83061	0.657128	0.540749	0.646457	0.558479
CpG_239	chr11	75895200	+	0.233953	0.456775	0.537165	0.243902	0.601003	0.220272	0.58738	0.195911	0.534329	0.283119	0.523172	0.267836	0.598168	0.336609	0.541189	0.207774	0.547913	0.253878	0.544629	0.621574	0.599791	0.607621	0.557531	0.548251	0.630257	0.354115	0.308187	0.296313	0.285446	0.284386	0.274722	0.565675	0.611431	0.572729	0	0.317757	0.334089	0.538567	0.568814	0.552041	0.488421	0.597675	0.447745	0.33884	0.318547	0.279542
CpG_240	chr11	80209445	-	0.00321888	0.0108021	0.00535961	0.00563204	0.00284468	0.00164504	0.0023919	0.00358038	0.00176025	0.0035301	0.0100985	0.00557828	0.00187899	0	0.000944109	0.00483811	0.000313824	0.000134898	0.00391598	0.00134745	0.00162668	0.000359712	0.00413304	0.000452284	0.00470003	0.00264046	0.00516055	0.00397516	0.00157315	0.00375235	0.00592495	0.00131907	0.000739754	0.00988356	0	0	0.000668003	0.00471022	0.00151439	0.00328299	0	0	0	0.00126662	0.000369413	0.00110558
CpG_241	chr11	80209449	-	0.00368664	0.00481651	0.00745105	0.00167224	0.00495427	0.00456454	0.00700461	0.00483092	0.00300247	0.00764107	0.00630676	0.008977	0.000751315	0.010568	0.001701	0.00635039	0.0040842	0.00473421	0.0062422	0.00366018	0.0059232	0.00487893	0.00216791	0.00907441	0.00969261	0.00147145	0	0.00710015	0.00406984	0.00939261	0.00483676	0.00366838	0.000742832	0.00664587	0	0	0.000669792	0.00287356	0.00657895	0.00657895	0.00280899	0	0	0	0	0.00401329
CpG_242	chr11	80209458	-	0.00199387	0.00252236	0.000692521	0.00208899	0.00340716	0.00146145	0	0.00178987	0.00404502	0.00195963	0.00579929	0.0052064	0.0075061	0	0.000378072	0.00391426	0.00298507	0.00297458	0.00232019	0.00251062	0.00203874	0.00469738	0.0051171	0.000453515	0.000278474	0.00572351	0.00534964	0.00696431	0.0018351	0.00350877	0.00417261	0.00249633	0.00311342	0.00420738	0	0	0.0281501	0.00821018	0.00185968	0.00311987	0	0.000506329	0	0	0	0.00318119
CpG_243	chr11	80209463	-	0.0067828	0.00626886	0.00331299	0.0063065	0.00421133	0.00275482	0.00390335	0.00197628	0.00458878	0.0023706	0.0119898	0.00639699	0.0069864	0.0119363	0.00208887	0.00616707	0.00472144	0.00705563	0.00250851	0.00251645	0.00410762	0.00163073	0.00572896	0.000454959	0.00806452	0.00398759	0.000957854	0.00363545	0.00315623	0.00189107	0.00496032	0.00427036	0.00446894	0.00476709	0	0	0	0.00432544	0.00542557	0.00614414	0.016601	0.000508388	0	0.0273885	0.000753012	0.00208768
CpG_244	chr11	80209473	-	0.00478469	0.0011534	0.0126934	0.00398406	0.00703957	0.00513291	0.00240251	0.00485699	0.00300247	0.00530973	0.00684064	0.00187477	0.00207469	0.00132802	0.00782293	0.00282539	0.00410418	0.00311484	0.00662489	0.00502999	0.00326998	0.00740875	0.00654113	0	0.000836353	0.00561051	0.00652842	0.00149813	0.000791139	0.00426921	0.00132523	0.00621026	0.00119012	0.00068362	0	0	0.000671592	0.0047619	0.00491942	0.00611267	0.000564334	0.000509944	0.000927644	0	0.00111566	0.00180731
CpG_245	chr11	80209476	-	0.00199448	0.00597015	0.00190443	0.00793485	0.00265202	0.00695716	0.00606729	0.00466033	0.00635593	0.00784006	0.00529634	0.0031746	0.00433799	0.0198151	0.00661501	0.00596459	0.00676313	0.0062028	0.000535427	0.00134901	0.00530288	0.00433057	0.00632036	0	0.000831716	0.00470381	0.00133869	0.00546788	0.00445143	0.00137845	0.00603997	0.00427036	0.00207346	0.00135796	0	0	0.0435074	0.00349578	0.00067465	0.0018107	0	0.00101471	0	0	0.0137037	0.00166228
CpG_246	chr11	80209479	-	0.000923077	0.000231374	0.00835946	0.00503567	0.0108139	0.00496689	0	0.0016225	0.00301472	0.00257069	0.00559085	0.00788732	0.00396601	0	0.00285823	0.00523854	0.00631612	0.00230602	0.00179147	0.00622689	0.00020517	0.0054338	0.00378486	0.0124195	0.00642099	0.00856341	0.00388651	0.00440751	0.00265393	0.00419101	0.00289403	0.00268057	0.00405162	0.0010989	0	0	0	0.00373677	0.00340252	0.00365813	0.00539466	0.000515198	0.000928505	0	0.000374111	0.0037757
CpG_247	chr11	80209493	-	0.00784012	0.00380447	0.00113379	0.00617801	0.00152005	0.00569277	0.00156538	0.00242392	0.00877038	0.00561742	0.0107581	0.000932227	0.00781471	0	0.00492331	0.00347418	0.0016568	0.00601473	0.00214267	0.0103392	0.00734619	0.00417916	0.00571879	0.000454649	0.00485909	0.00786765	0.00172265	0.00922291	0.00170873	0.00495422	0.00379475	0.00243435	0.00402145	0.00197346	0	0.00228833	0	0.00349866	0.00515377	0.00115293	0.000422	0.0225831	0.000925926	0	0.000370645	0.00381865
CpG_248	chr11	80209518	-	0.00275989	0.00183108	0.00138672	0.00188127	0.00415094	0.00328048	0.00184877	0.00393138	0.00543097	0.000392465	0.00505945	0.00148865	0.00225183	0	0.000945001	0.000185494	0.00329463	0.00769438	0.0012418	0.00154381	0.00142479	0.00252116	0.00216068	0.0167953	0.00331583	0.00455012	0.00572301	0.00572139	0.00393804	0.0032606	0.00285088	0.000731101	0.00311434	0.0029871	0	0	0	0.00451838	0.00403429	0.0019698	0.00309772	0.000506586	0.000923361	0	0.00111029	0.00512394
CpG_249	chr11	80209525	-	0.00462321	0.00507497	0.00782609	0.00335993	0.00667684	0.00311014	0.00738007	0.000897989	0.00371747	0.00511107	0.00532454	0.00375023	0.00320694	0.0171504	0.00208097	0.00544192	0.00141643	0.00340414	0.00411449	0.0108192	0.00409752	0.00234276	0.00276954	0.000453721	0.00221484	0.00308914	0.00535066	0.00174108	0.00301758	0.00188017	0.00879024	0.00102926	0.00445964	0.0019045	0	0	0.00133958	0.00534539	0.00388579	0.00693527	0.00308729	0.000507099	0.0193727	0.019084	0.00148313	0.00820356
CpG_250	chr11	80209537	-	0.00399693	0.00414079	0.00762433	0.00461023	0.00303721	0.00621345	0.003688	0.00359906	0.0024687	0.0015714	0.00783026	0.00540742	0.00508666	0.00132275	0.000568074	0.00280794	0.00613787	0.0055548	0.00178731	0.00308821	0.00837076	0.0010844	0.00395023	0.000910747	0.00390407	0.00250074	0.00115031	0.00473108	0.00289131	0.00426868	0.0046164	0.00705779	0.00223248	0.00245935	0	0	0	0.00184919	0.00237369	0.003622	0.00197183	0.00153061	0.000925926	0.000635728	0.00111483	0.00277739
CpG_251	chr11	80209541	-	0.00184672	0.00230362	0.00450841	0.00669456	0.00151716	0.00766843	0.00259788	0.00359002	0.00652212	0.00548912	0.0108586	0.00335821	0.00320755	0	0.00549346	0.00205339	0.00251572	0.00446368	0.00107085	0.00424874	0.00490296	0.00342775	0.0029656	0.0122505	0.000831947	0.00706298	0.00554812	0.00473343	0.00262571	0.00175461	0.00538107	0.00969875	0.00533333	0.00529603	0	0	0.000668449	0.00226804	0.00236167	0.00164555	0.00337173	0.00101523	0.00461681	0.00127065	0.00189036	0.00485774
CpG_252	chr11	80209553	-	0.00980392	0.00395349	0.00663524	0.00549915	0.00592168	0.00758838	0.00763928	0.0048913	0.00409763	0.00652432	0.0122355	0.00845865	0.00532016	0.042838	0.00496467	0.00486436	0.00619933	0.00818107	0.0107972	0.00718586	0.00471698	0.0130175	0.0069211	0.0241128	0.0119677	0.0111012	0.00308285	0.00512244	0.00329685	0.0035229	0.00672992	0.00457497	0.00357462	0.00410341	0.0526316	0.00229358	0.00536913	0.00414336	0.00834043	0.00678808	0.0104314	0.0346762	0.00370714	0.00381194	0.0078329	0.00823218
CpG_253	chr11	82929283	-	0.782019	0.874704	0.859119	0.827991	0.888251	0.806118	0.889324	0.811589	0.86916	0.802297	0.863081	0.766769	0.813845	0.87232	0.835108	0.726439	0.817206	0.730376	0.794434	0.860371	0.852688	0.886866	0.865925	0.898866	0.880673	0.774823	0.792361	0.792272	0.760872	0.782617	0.805935	0.834187	0.847079	0.859063	NA	0.753086	0.778019	0.828164	0.8093	0.832588	0.869845	0.858989	0.837703	0.755572	0.811715	0.749402
CpG_254	chr11	82929290	-	0.568698	0.760357	0.703731	0.659085	0.750022	0.626485	0.763632	0.627198	0.737692	0.610774	0.728669	0.394737	0.516129	NA	0.192308	0.628319	0.243243	0.163793	0.5	0.726895	0.70913	0.746845	0.718736	0.711826	0.772827	0.634701	0.644878	0.64625	0.587489	0.596012	0.625016	0.0784314	0.497143	0.565574	NA	NA	0.2	0.303371	0.257426	0.283582	0.321429	0.4	0.333333	0.333333	0.304348	0.333333
CpG_255	chr11	82929305	-	0.610017	0.821408	0.829029	0.708903	0.814965	0.706423	0.847248	0.664875	0.805018	0.683713	0.760728	0.630123	0.754269	0.660166	0.777076	0.651762	0.74578	0.636333	0.77072	0.798595	0.78222	0.839595	0.786386	0.800309	0.833386	0.687611	0.710649	0.675649	0.654421	0.694773	0.706724	0.763923	0.762198	0.784767	NA	0.450515	0.784993	0.748264	0.758221	0.760662	0.830529	0.789666	0.793442	0.715456	0.725476	0.672131
CpG_256	chr11	82929360	-	0.752668	0.815832	0.855803	0.763003	0.850043	0.777488	0.845188	0.760662	0.834098	0.772212	0.841509	0.643941	0.728429	0.71484	0.741037	0.621525	0.689181	0.595646	0.687359	0.796749	0.814953	0.838185	0.819512	0.876019	0.893163	0.772543	0.770485	0.729928	0.7285	0.781065	0.765448	0.712876	0.736807	0.743975	NA	0.285714	0.736455	0.740381	0.711632	0.733212	0.809606	0.803589	0.794239	0.741277	0.790632	0.659614
CpG_257	chr11	85457844	-	0.890105	0.882432	0.922451	0.86185	0.932886	0.876122	0.889908	0.898727	0.889904	0.807051	0.887018	0.852876	0.884191	0.985	0.902847	0.878351	0.878049	0.81584	0.9	0.922731	0.920132	0.949349	0.918613	0.93607	0.96423	0.952191	0.927178	0.915451	0.90611	0.944596	0.915398	0.903793	0.91788	0.953001	1	1	0.961215	0.925473	0.890717	0.920116	0.939834	0.964425	0.970549	0.971364	0.951648	0.906678
CpG_258	chr11	85457874	-	0.809648	0.846403	0.839744	0.792043	0.839492	0.817101	0.837616	0.839782	0.825218	0.76646	0.823768	0.795201	0.813515	0.997596	0.811019	0.801662	0.831575	0.747881	0.850963	0.885212	0.870352	0.90274	0.86521	0.902223	0.903075	0.887451	0.877553	0.862012	0.860196	0.869575	0.848621	0.833057	0.847061	0.885106	1	0.947411	0.939527	0.879114	0.863092	0.860146	0.905342	0.94042	0.899913	0.970022	0.908507	0.85277
CpG_259	chr11	85457877	-	0.833688	0.855314	0.883721	0.832738	0.874363	0.811942	0.841254	0.817256	0.836281	0.790698	0.854291	0.801508	0.811222	0.995204	0.851351	0.813112	0.865177	0.760241	0.853921	0.90771	0.879727	0.923458	0.905693	0.930024	0.924775	0.918529	0.910834	0.888825	0.879779	0.896121	0.874	0.856017	0.865715	0.92139	1	0.905297	0.988211	0.89402	0.847567	0.885792	0.934069	0.913647	0.925458	0.986055	0.880937	0.875218
CpG_260	chr11	94500225	+	0.745855	0.764263	0.735187	0.675033	0.765178	0.74067	0.77711	0.736104	0.78034	0.73313	0.801541	0.761301	0.81519	0.779607	0.796525	0.7815	0.774967	0.788788	0.808284	0.749491	0.749707	0.738835	0.751624	0.691619	0.719895	0.703924	0.682203	0.699072	0.682005	0.678437	0.718501	0.78512	0.788507	0.776029	0.875686	0.708623	0.764328	0.809255	0.787345	0.798437	0.79713	0.752713	0.785584	0.760778	0.748927	0.76775
CpG_261	chr11	94500229	+	0.26349	0.370466	0.345218	0.245916	0.369243	0.261913	0.381311	0.29515	0.396635	0.306693	0.416085	0.3125	0.214286	NA	0.157895	0.346154	0.142857	0.133333	0.190476	0.339276	0.330549	0.362177	0.357506	0.293396	0.358357	0.276147	0.282852	0.250009	0.242718	0.229378	0.252247	0.025	0.478022	0.0638298	NA	NA	0.102041	0.333333	0.0526316	0.228188	0.113924	0.637795	0.2	0.103448	0.115385	0.259398
CpG_262	chr11	97067502	+	0.868747	0.9159	0.896973	0.868789	0.900735	0.894821	0.922782	0.856687	0.90019	0.873881	0.894065	0.89409	0.904384	0.890754	0.894655	0.867456	0.913448	0.897074	0.924467	0.887202	0.887627	0.890551	0.880259	0.912451	0.904702	0.855504	0.865408	0.850455	0.84921	0.864262	0.854566	0.902199	0.908766	0.902732	0.913065	0.915311	0.903619	0.923074	0.922484	0.91778	0.918476	0.905238	0.929615	0.905745	0.894975	0.893348
CpG_263	chr11	97067516	+	0.968763	0.969877	0.980217	0.973412	0.974179	0.962385	0.971978	0.961144	0.974047	0.961357	0.974487	0.968166	0.974848	0.981323	0.972207	0.953178	0.979555	0.968794	0.969783	0.967885	0.970171	0.977147	0.972162	0.983574	0.979345	0.960026	0.967055	0.965298	0.959141	0.956956	0.959719	0.978304	0.967797	0.977753	0.895772	0.973264	0.974333	0.972048	0.979954	0.974529	0.981294	0.986057	0.981396	0.979347	0.981421	0.970923
CpG_264	chr11	97067540	+	0.727223	0.801524	0.776982	0.761104	0.80844	0.752268	0.800057	0.725901	0.782167	0.760762	0.789239	0.770961	0.802534	0.81367	0.779287	0.741033	0.787229	0.744262	0.779955	0.811505	0.78605	0.799212	0.794957	0.782436	0.806656	0.740414	0.751805	0.780158	0.752255	0.720318	0.734996	0.788739	0.799027	0.775591	0.74798	0.75184	0.765915	0.769791	0.790525	0.801282	0.809128	0.801098	0.834129	0.725119	0.753161	0.756931
CpG_265	chr11	97067546	+	0.818908	0.844308	0.862072	0.855594	0.849066	0.809703	0.863012	0.80552	0.845641	0.829743	0.877298	0.833317	0.855417	0.879612	0.872812	0.846188	0.848678	0.816123	0.844379	0.851048	0.8472	0.868163	0.835578	0.829971	0.857511	0.811166	0.837008	0.852444	0.83123	0.791305	0.808277	0.85344	0.866519	0.843069	0.806117	0.808429	0.827445	0.836662	0.826811	0.843278	0.849475	0.843923	0.87936	0.828866	0.82354	0.806414
CpG_266	chr11	97067573	+	0.945709	0.955012	0.95784	0.929996	0.950125	0.930259	0.956001	0.93111	0.957429	0.931945	0.943038	0.955621	0.948212	0.967004	0.951706	0.941449	0.95197	0.956156	0.943667	0.940724	0.939174	0.951094	0.937433	0.927044	0.950476	0.923659	0.925845	0.951118	0.920438	0.915416	0.940176	0.951404	0.951434	0.943838	0.911824	0.935716	0.955331	0.947317	0.946243	0.950865	0.946695	0.937381	0.96583	0.925597	0.924274	0.941285
CpG_267	chr11	97067578	+	0.857143	0.884412	0.892149	0.875594	0.904842	0.861143	0.910911	0.872062	0.890788	0.887179	0.886136	0.907844	0.913625	0.883765	0.880287	0.88254	0.90085	0.882696	0.901589	0.889888	0.887075	0.896594	0.894164	0.862162	0.895565	0.853583	0.877429	0.877533	0.857362	0.839664	0.867503	0.891505	0.907739	0.888759	0.821499	0.908853	0.893047	0.884416	0.905352	0.87895	0.903506	0.904295	0.914775	0.885877	0.861625	0.863396
CpG_268	chr11	97067605	+	0.761069	0.822162	0.83312	0.823952	0.838916	0.813187	0.863824	0.784145	0.816094	0.762003	0.86299	0.817828	0.8493	0.814371	0.830577	0.808002	0.841145	0.806824	0.855265	0.805456	0.827734	0.851183	0.836637	0.841755	0.85902	0.79388	0.814016	0.815521	0.81223	0.790158	0.786747	0.822876	0.862216	0.81593	0.786325	0.814757	0.816808	0.855856	0.851218	0.824589	0.85956	0.864235	0.849362	0.833922	0.826978	0.821586
CpG_269	chr11	97573788	-	0.0694444	0.0175439	0	0.0353357	0.0211268	0.198473	0	0.0454545	0	0.0228571	0	0.0502513	0.025641	NA	0	0.0965732	0.0949153	0.0724638	0.0201613	0.0565476	0.0204778	0	0.0305556	0	0	0.0857143	0.015873	0.0229592	0.0583554	0	0.0297619	0.0946237	0.0659631	0	NA	NA	NA	0.131429	0.0271605	0.0448179	0	NA	NA	NA	0	0.0431472
CpG_270	chr11	97573807	-	0.09375	0.0818713	0.0686695	0.0530035	0.034965	0	0.0114068	0.0335821	0.0377358	0.114286	0.0625	0	0.0212766	NA	0	0.0280374	0.0442177	0	0.00401606	0.048048	0.0510204	0.07	0.0914127	0	0	0.0761905	0.0952381	0.0331633	0.0106101	0.0337838	0.0357143	0.0213675	0.055409	0.0318725	NA	NA	NA	0	0.0123457	0.00558659	0	NA	NA	NA	0	0.0380711
CpG_271	chr11	97573824	-	0.00179856	0.00297619	0.0488889	0.047619	0.0251799	0.00588235	0.00195312	0.0673077	0.00325733	0	0.032	0.0284974	0.021978	NA	0.00304878	0.0352	0	0.0818859	0.0324544	0.0347551	0.0879713	0	0.0477569	0	0.103448	0.00246914	0.10084	0.0256757	0.0194175	0.0385965	0.0471204	0.0258427	0.0509642	0.0123203	NA	NA	NA	0.0060241	0.0179487	0.0291121	0	NA	NA	NA	0	0.0474308
CpG_272	chr11	97573849	-	0.0174825	0.0997067	0.0107759	0.0962567	0	0.0556622	0.00191205	0	0.00946372	0	0.0314961	0.0922693	0.0362473	NA	0.00597015	0.0282132	0.0136519	0.0241546	0.0361446	0.00152672	0.0633562	0	0.0432357	0	0	0	0.0952381	0.0306905	0.0331126	0	0.00799201	0.0472103	0.113757	0.0678643	NA	NA	NA	0.0514286	0.00987654	0.0281294	0	0	NA	NA	0	0.0403531
CpG_273	chr11	97573853	-	0.026643	0.00301205	0.0637363	0.0362319	0.00727273	0	0	0	0.00645161	0.0379009	0	0.0103359	0.0471092	NA	0	0	0.0852174	0.0147059	0.00616016	0.0218487	0.0675676	0.0333333	0.0246914	0	0	0	0.25	0.0519481	0.0662739	0	0.0146067	0.00628141	0.0903522	0.0021692	NA	NA	NA	0	0.0813464	0.0558214	0	NA	NA	NA	0	0.0156695
CpG_274	chr11	97573855	-	0	0	0.00429185	0.0358423	0.041958	0.0574713	0	0.0300752	0.00613497	0.00581395	0	0.0152284	0.0170213	NA	0	0	0	0	0.00401606	0.012012	0	0	0.027933	0	0.0666667	0	0	0.0205128	0.0239362	0	0.0219561	0.00858369	0.0211082	0.031746	NA	NA	NA	0.12	0.0272277	0.0028169	0	NA	NA	NA	0	0.00253165
CpG_275	chr11	97573862	-	0	0.00588235	0.04329	0.0954064	0.0437956	0.00766284	0.0304183	0	0.0188679	0.0520231	0.046875	0.005	0.0128205	NA	0	0.0125392	0.00341297	0	0.0364372	0.021021	0.00682594	0.0792079	0.0333333	0	0.0655738	0.0382775	0.015873	0.0358974	0.0159151	0	0.0218688	0.0344828	0.0212202	0	NA	NA	NA	0	0.0321782	0.0224719	0	NA	NA	NA	0	0.00250627
CpG_276	chr11	97573865	-	0.0035461	0.0117647	0.0436681	0.0567376	0	0.0306513	0.0196078	0	0.0188679	0.0578035	0.0546875	0.130653	0.0128755	NA	0.0481928	0.0377358	0.00699301	0.00485437	0.0441767	0.0271084	0.0138408	0.07	0.0334262	0	0	0	0	0.0333333	0.0795756	0	0.0178926	0.0172414	0.0795756	0.0478088	NA	NA	NA	0	0.0548628	0.0255682	0	NA	NA	NA	0	0.0150754
CpG_277	chr11	97573889	-	0.111888	0.0116959	0.0729614	0.0673759	0.0633803	0.125954	0.10687	0.0483271	0.0886076	0.0685714	0.0703125	0.0452261	0.140426	NA	0	0.0436137	0.0508475	0.0628019	0.072	0.0686567	0.140411	0.0891089	0.0947075	0.0625	0	0.0238095	0	0.0383632	0.161376	0.129252	0.0892857	0.0324675	0.0899471	0.0517928	NA	NA	NA	0.0571429	0.0519802	0.00561798	1	NA	NA	NA	0	0.0453401
CpG_278	chr11	97573894	-	0.130282	0.0119048	0.0131579	0.0179856	0.0285714	0.0505837	0.0692308	0.030303	0.160256	0.0809249	0.072	0	0.0132159	NA	0	0.0251572	0.0140845	0.0195122	0.0294118	0.0429448	0.0359712	0.00990099	0.0538244	0.0625	0.0655738	0.0588235	0.0983607	0.0235602	0.0739726	0.020979	0.0352697	0.0110132	0.0298103	0.072	NA	NA	NA	0.0116279	0.0427136	0.0573066	0.05	NA	NA	NA	0	0.0437018
CpG_279	chr11	97573897	-	0.00701754	0.0179641	0.0646552	0.046595	0	0.0383142	0.0117647	0.0557621	0.00632911	0.00574713	0.0625	0.0248756	0.0515021	NA	0.0060241	0.0222222	0.00680272	0	0.0120482	0.021021	0.0274914	0	0.128134	0.0625	0.377049	0.0576923	0	0.0745501	0.0583554	0.00680272	0.0521042	0.0343348	0.0765172	0.0278884	NA	NA	NA	0.00571429	0.00496278	0.0586592	0	NA	NA	NA	0	0.0326633
CpG_280	chr11	97626436	-	0.513418	0.48688	0.502934	0.462046	0.447895	0.544761	0.454008	0.46172	0.560122	0.54637	0.581435	0.505482	0.491812	0.385214	0.459155	0.572	0.474185	0.528052	0.451084	0.475094	0.53184	0.507651	0.544392	0.465627	0.515028	0.558083	0.536139	0.525317	0.517986	0.565895	0.524208	0.459832	0.509119	0.500959	0	0.694561	0.547133	0.45418	0.437182	0.464675	0.466839	0.452673	0.602649	0.458269	0.571016	0.528455
CpG_281	chr11	97626441	-	0.53144	0.501092	0.53349	0.50363	0.514797	0.557559	0.486141	0.529206	0.508363	0.572246	0.650967	0.519147	0.4913	0.595331	0.442416	0.579414	0.472894	0.541319	0.520657	0.501768	0.519481	0.526649	0.586907	0.52417	0.548915	0.605317	0.570677	0.567806	0.570116	0.574442	0.569781	0.457404	0.534216	0.515544	0	0.691983	0.62451	0.459286	0.431822	0.483673	0.494963	0.468902	0.617257	0.51284	0.576968	0.548687
CpG_282	chr11	97626484	-	0.263825	0.310496	0.294464	0.293709	0.261789	0.319401	0.306302	0.299005	0.347505	0.240502	0.337537	0.273077	0.266735	0.132296	0.302391	0.258667	0.312283	0.308826	0.300451	0.238269	0.239277	0.284467	0.277502	0.229632	0.3214	0.227196	0.191414	0.223161	0.235841	0.24672	0.255847	0.278408	0.282574	0.305803	0	0.229958	0.300833	0.274454	0.274829	0.298978	0.275576	0.408331	0.451327	0.352003	0.396927	0.298734
CpG_283	chr11	97626515	-	0.22341	0.287791	0.330394	0.263366	0.358711	0.321999	0.257022	0.287544	0.342611	0.358828	0.338099	0.290552	0.314359	0.416342	0.330301	0.267936	0.340051	0.343903	0.343568	0.274505	0.349247	0.303285	0.326521	0.265589	0.382592	0.322346	0.278868	0.257443	0.251551	0.298717	0.292539	0.324782	0.314884	0.33756	0.568966	0.5	0.47036	0.321344	0.32299	0.345336	0.33775	0.409111	0.343612	0.386276	0.370115	0.329876
CpG_284	chr11	97626528	-	0.347848	0.369913	0.379108	0.349701	0.434573	0.32707	0.362955	0.34965	0.394911	0.361795	0.426644	0.384447	0.407369	0.365759	0.479433	0.361161	0.38069	0.463812	0.458999	0.37194	0.38467	0.40649	0.388225	0.403691	0.372653	0.382959	0.3746	0.333805	0.334927	0.352781	0.395169	0.414583	0.387261	0.427444	1	0.829167	0.560739	0.413295	0.398288	0.425581	0.3963	0.519264	0.361233	0.415574	0.429395	0.380218
CpG_285	chr11	97626959	-	0.680437	0.570539	0.623452	0.66289	0.556818	0.726752	0.533168	0.685761	0.618137	0.695652	0.579717	0.704274	0.597501	0.582213	0.599394	0.69524	0.582345	0.71522	0.557018	0.569834	0.597918	0.608621	0.593641	0.566353	0.613058	0.649425	0.650546	0.631654	0.639016	0.651094	0.670966	0.580719	0.606326	0.605022	NA	0.763575	0.758675	0.60487	0.562848	0.607827	0.650591	0.601051	0.63905	0.681396	0.707776	0.711287
CpG_286	chr11	97626977	-	0.630749	0.554631	0.591211	0.65824	0.564591	0.687824	0.52286	0.650785	0.611309	0.652626	0.582095	0.664154	0.603025	0.633094	0.571524	0.664808	0.571752	0.69248	0.570836	0.552528	0.585478	0.582368	0.595452	0.542159	0.621081	0.619782	0.641268	0.624051	0.628756	0.622855	0.652394	0.560751	0.582368	0.598101	NA	0.746303	0.704847	0.575879	0.54324	0.600015	0.618521	0.577384	0.614962	0.716243	0.665777	0.67413
CpG_287	chr11	97626983	-	0.89516	0.809881	0.840667	0.871553	0.807845	0.914294	0.794584	0.879843	0.821213	0.891481	0.821637	0.903326	0.843299	0.855072	0.828327	0.894709	0.837055	0.891302	0.82229	0.800972	0.833561	0.829632	0.82014	0.814224	0.824619	0.857301	0.859059	0.847903	0.853174	0.859638	0.87968	0.821112	0.830786	0.826599	NA	0.954442	0.882731	0.818961	0.810424	0.833816	0.835422	0.826	0.832977	0.899943	0.872863	0.899106
CpG_288	chr11	97627018	-	0.632613	0.518619	0.542072	0.623565	0.497702	0.659519	0.492158	0.633625	0.563738	0.653567	0.536606	0.628563	0.530795	0.709362	0.523585	0.652476	0.510091	0.664225	0.489945	0.510954	0.533692	0.554533	0.566427	0.534062	0.545843	0.604823	0.598632	0.581196	0.595679	0.606064	0.606351	0.497668	0.542008	0.558694	NA	0.7336	0.736155	0.533805	0.506283	0.554625	0.547699	0.53365	0.512926	0.617175	0.630493	0.638
CpG_289	chr11	97627074	-	0.769064	0.729214	0.737718	0.748407	0.759216	0.768015	0.775555	0.775098	0.770466	0.752017	0.762951	0.787179	0.777445	0.635619	0.738935	0.781382	0.745879	0.808693	0.772504	0.725066	0.746018	0.750973	0.73226	0.763254	0.729859	0.747921	0.749863	0.727245	0.742994	0.758766	0.774169	0.759143	0.757392	0.769569	NA	0.723476	0.850844	0.773339	0.752928	0.76367	0.776091	0.771604	0.77636	0.78143	0.805978	0.798847
CpG_290	chr11	97627435	-	0.523641	0.485202	0.55914	0.46719	0.542188	0.394737	0.492693	0.463539	0.548234	0.52911	0.584095	0.544977	0.505171	0.42963	0.505335	0.513274	0.478296	0.484954	0.437046	0.540618	0.576032	0.522375	0.501572	0.60473	0.511405	0.477519	0.435575	0.4362	0.459006	0.422377	0.469944	0.509941	0.521436	0.486806	NA	1	0.354779	0.527277	0.451561	0.501925	0.593987	0.381569	0.402516	0.445279	0.548872	0.417189
CpG_291	chr11	97627457	-	0.49248	0.52909	0.621801	0.390776	0.531201	0.44957	0.564298	0.444476	0.544274	0.49661	0.599278	0.452046	0.612172	0.298343	0.539051	0.487603	0.521431	0.570522	0.502874	0.49543	0.516264	0.513693	0.553963	0.564793	0.532145	0.411531	0.390973	0.375087	0.44358	0.356034	0.386333	0.51008	0.5401	0.495846	NA	0	0.487985	0.551068	0.493191	0.543702	0.582963	0.65442	0.515756	0.310123	0.636669	0.478672
CpG_292	chr11	97627526	-	0.65625	0.592564	0.707665	0.669029	0.715391	0.598566	0.68232	0.676897	0.667117	0.732489	0.730528	0.740885	0.64933	0.67033	0.683093	0.739802	0.64668	0.71789	0.660682	0.6587	0.678981	0.626947	0.639583	0.669333	0.677694	0.641175	0.663856	0.631034	0.678658	0.613068	0.701896	0.649226	0.664311	0.666787	NA	1	0.926874	0.669444	0.628389	0.644	0.710658	0.653061	0.503119	0.643237	0.707155	0.668999
CpG_293	chr11	98361072	+	0.300323	0.516189	0.434066	0.361913	0.352512	0.3634	0.541935	0.260181	0.449311	0.340385	0.331169	0.333553	0.441558	0.10625	0.475256	0.25	0.373322	0.308348	0.453608	0.427744	0.413835	0.468081	0.410205	0.465693	0.424588	0.358612	0.335642	0.309864	0.296751	0.315553	0.346234	0.39329	0.413809	0.40492	0.276119	0	0.51041	0.422081	0.382696	0.436976	0.404799	0.3537	0.279866	0.374404	0.353196	0.345723
CpG_294	chr11	98361109	+	0.2169	0.452447	0.354052	0.337727	0.340704	0.271077	0.48023	0.354237	0.353511	0.255053	0.260259	0.235837	0.353523	0.398119	0.407313	0.270018	0.40848	0.278093	0.359892	0.379467	0.344026	0.396891	0.364977	0.326477	0.367421	0.308856	0.302519	0.262492	0.245509	0.281063	0.280508	0.364963	0.369782	0.383794	0.273567	0	0.332799	0.358167	0.353296	0.387689	0.369017	0.325809	0.410596	0.36805	0.292997	0.288574
CpG_295	chr11	98361124	+	0.440953	0.627306	0.505481	0.461285	0.492754	0.415584	0.598278	0.487557	0.490323	0.454894	0.469697	0.419525	0.524044	0.25	0.527397	0.404206	0.519231	0.418736	0.541802	0.487915	0.473955	0.552144	0.470478	0.573468	0.51335	0.474476	0.439326	0.441463	0.404525	0.422177	0.425813	0.48566	0.514301	0.505356	0.272059	0.607595	0.532051	0.489676	0.475357	0.532902	0.432738	0.400301	0.588723	0.305947	0.531369	0.44883
CpG_296	chr11	98837513	+	0.119723	0.0979762	0.119836	0.135004	0.10624	0.140227	0.098391	0.120101	0.113476	0.117613	0.11162	0.460623	0.470731	0.473267	0.438514	0.50297	0.475913	0.49766	0.510305	0.109038	0.111168	0.137159	0.0940558	0.159284	0.117418	0.120897	0.138484	0.111875	0.142272	0.150061	0.130575	0.518638	0.524251	0.513434	NA	0.707317	0.528912	0.535057	0.518083	0.5412	0.625303	0.622306	0.598645	0.640373	0.683496	0.543822
CpG_297	chr11	98837526	+	0.0672474	0.0599335	0.07125	0.0847185	0.0717944	0.091204	0.0675108	0.0852544	0.0797005	0.0716147	0.0727352	0.442629	0.442394	0.49505	0.419552	0.475442	0.4521	0.467044	0.497253	0.0569925	0.0501678	0.0688865	0.0600614	0.0228519	0.0424414	0.0773107	0.0889908	0.063315	0.0955406	0.0908444	0.0742085	0.505618	0.497793	0.496647	NA	0.707317	0.479398	0.521009	0.498194	0.517441	0.602972	0.61827	0.638748	0.655054	0.5848	0.511243
CpG_298	chr11	98837551	+	0.0454289	0.031163	0.0335141	0.0531343	0.0284026	0.0641038	0.0354529	0.0458961	0.0367653	0.041001	0.0402092	0.427698	0.426157	0.472222	0.401249	0.452092	0.435132	0.444497	0.476564	0.0382356	0.0379193	0.0485559	0.037254	0.0218778	0.0370321	0.0492347	0.0560648	0.0434957	0.0569902	0.0518485	0.0437059	0.485987	0.482401	0.482244	NA	0.707317	0.43531	0.494038	0.478868	0.506419	0.589034	0.649869	0.607445	0.619329	0.634784	0.492927
CpG_299	chr11	98837554	+	0.0715162	0.0550852	0.0812469	0.105159	0.0673138	0.113247	0.0664188	0.0778028	0.0670875	0.0974257	0.08911	0.470338	0.457955	0.473054	0.434039	0.487141	0.467672	0.491738	0.509516	0.05256	0.0568554	0.0644369	0.0453408	0.0702786	0.0696592	0.0713154	0.080953	0.0729951	0.0783352	0.0811731	0.0576298	0.51501	0.50779	0.508028	NA	0.716049	0.449636	0.528912	0.513886	0.534585	0.615385	0.667423	0.613617	0.658077	0.67097	0.528406
CpG_300	chr11	98837590	+	0.0431601	0.0198463	0.0285941	0.0455496	0.0299028	0.053171	0.0340871	0.0334651	0.0255571	0.0301877	0.0427723	0.435354	0.438224	0.482234	0.411255	0.46897	0.449062	0.464808	0.487677	0.029934	0.0257016	0.032542	0.0274339	0.0793879	0.0237861	0.0354128	0.0346217	0.0276661	0.0399145	0.0247987	0.0349213	0.492086	0.491297	0.492794	NA	0.714286	0.436512	0.506485	0.492545	0.512184	0.587998	0.637153	0.612451	0.659135	0.616118	0.498052
CpG_301	chr11	98837596	+	0.0642925	0.0389527	0.0513699	0.0612443	0.0341728	0.0647448	0.0478062	0.0516061	0.0421768	0.0481377	0.051864	0.432137	0.436451	0.456	0.406639	0.460646	0.435583	0.458842	0.47882	0.0446078	0.0449529	0.0599539	0.040223	0.0174836	0.0440589	0.0453876	0.0502671	0.047131	0.0535194	0.0541222	0.0553951	0.49819	0.489718	0.496227	NA	0.707317	0.487789	0.501881	0.487965	0.507076	0.578203	0.613814	0.670121	0.609479	0.637343	0.49649
CpG_302	chr11	98837600	+	0.0551355	0.033129	0.0368567	0.0431666	0.0355787	0.072457	0.0462732	0.0518555	0.0366063	0.051824	0.0442459	0.423677	0.42751	0.466801	0.399886	0.450425	0.43453	0.451953	0.474026	0.0312974	0.0356426	0.0382696	0.0288071	0.0299118	0.0260564	0.0403442	0.039558	0.0352738	0.0347323	0.0339224	0.0307283	0.479279	0.470936	0.47516	NA	0.707317	0.451581	0.494797	0.474336	0.496675	0.558476	0.60164	0.653205	0.612245	0.57352	0.480725
CpG_303	chr11	98837621	+	0.0301948	0.0230917	0.0169598	0.0306655	0.022465	0.0468822	0.0236321	0.0295403	0.0178903	0.0308018	0.034374	0.390234	0.403293	0.36747	0.370153	0.425095	0.401185	0.408286	0.449382	0.0194433	0.0235671	0.0156598	0.0156438	0.0176238	0.0229345	0.0203537	0.021226	0.0205419	0.0206405	0.0310471	0.0223886	0.459039	0.45647	0.456224	NA	0.707317	0.414426	0.463777	0.457111	0.472722	0.539962	0.58269	0.563512	0.578502	0.59434	0.451348
CpG_304	chr11	98837633	+	0.0706245	0.0641728	0.0651582	0.076072	0.063142	0.0882107	0.0580411	0.0735055	0.0592438	0.0541715	0.0636274	0.437125	0.43541	0.466934	0.411049	0.463053	0.441435	0.452469	0.485775	0.0698725	0.0685591	0.0742916	0.0586429	0.0761671	0.0705882	0.0662624	0.0820076	0.0555377	0.0741861	0.0785252	0.0738187	0.490901	0.489173	0.494404	NA	0.691358	0.460925	0.504293	0.485563	0.512464	0.595409	0.594067	0.616725	0.626718	0.631665	0.499268
CpG_305	chr11	99144634	-	0.997859	0.811736	0.837607	0.926523	0.79564	0.980836	0.869936	0.931641	0.916667	0.959128	0.801829	0.928571	0.871377	0.888508	0.789157	0.98184	0.793478	0.968009	0.90352	0.804804	0.865402	0.884368	0.874511	0.79883	0.900919	0.926011	0.928074	0.934657	0.947078	0.940373	0.945774	0.829794	0.828111	0.85778	1	0.688073	0.982079	0.830709	0.846339	0.883711	0.858034	0.934801	0.784407	0.979675	0.913284	0.932507
CpG_306	chr11	99144681	-	0.935244	0.651534	0.793866	0.904	0.722826	0.943054	0.810782	0.92433	0.780338	0.842391	0.773414	0.866548	0.666065	0.784615	0.816265	0.833032	0.755688	0.952719	0.73234	0.710494	0.780502	0.800095	0.790288	0.698915	0.852756	0.86513	0.885794	0.886709	0.876028	0.88684	0.874746	0.708039	0.749099	0.75352	1	0.694064	0.953989	0.744795	0.740759	0.776258	0.774634	0.811272	0.589897	0.865292	0.811955	0.880807
CpG_307	chr11	99144720	-	0.664544	0.35122	0.491453	0.571429	0.360434	0.611015	0.528541	0.646272	0.518405	0.642276	0.459215	0.56383	0.44964	0.522184	0.587349	0.623345	0.440476	0.687943	0.461935	0.408753	0.475599	0.551776	0.534324	0.594522	0.535144	0.583156	0.596905	0.563587	0.586699	0.6048	0.593624	0.435994	0.478716	0.472023	0.64878	0.409091	0.594884	0.473079	0.480134	0.448305	0.472125	0.623656	0.33307	0.696663	0.550729	0.632723
CpG_308	chr11	101165534	-	0.65843	0.791423	0.772703	0.659074	0.779717	0.68299	0.727419	0.669921	0.73762	0.679426	0.771588	0.723008	0.734348	NA	0.797431	0.732702	0.749852	0.726525	0.8125	0.723121	0.742722	0.757721	0.680546	0.834661	0.743266	0.694527	0.642696	0.658145	0.660982	0.695878	0.65299	0.777197	0.781589	0.810263	NA	1	0.798701	0.844177	0.815347	0.803406	0.790892	0.666667	0.733333	0.608696	0.833333	0.671325
CpG_309	chr11	101165579	-	0.892624	0.942081	0.921358	0.896631	0.936632	0.879216	0.881629	0.864174	0.919505	0.837662	0.931983	0.839938	0.93195	NA	0.917398	0.918328	0.92166	0.885959	0.929177	0.903118	0.929476	0.909758	0.912508	1	0.919696	0.910605	0.903011	0.898094	0.893798	0.933201	0.898861	0.903754	0.955114	0.943062	NA	1	1	0.930286	0.932189	0.917891	0.974006	0.785321	1	0.929032	0.999199	0.870424
CpG_310	chr11	101165611	-	0.829491	0.969277	0.936593	0.842647	0.907191	0.830756	0.880741	0.810513	0.901335	0.831909	0.948682	0.870753	0.885411	NA	0.933005	0.87892	0.873223	0.863358	0.907563	0.902798	0.92152	0.898594	0.883433	0.981113	0.91762	0.880671	0.899103	0.891693	0.840755	0.850139	0.842418	0.899354	0.92123	0.929841	NA	1	1	0.916287	0.936653	0.909566	0.935543	0.786184	1	0.826087	0.884786	0.834311
CpG_311	chr11	101165617	-	0.476694	0.650343	0.559486	0.492658	0.554357	0.460017	0.606969	0.371638	0.667899	0.495183	0.495833	0.554566	0.633157	NA	0.658777	0.566134	0.636093	0.561989	0.702873	0.536282	0.640841	0.65027	0.544999	0.712724	0.537493	0.542406	0.53849	0.543526	0.472198	0.499801	0.527607	0.625	0.689816	0.669835	NA	1	0.571429	0.657546	0.695834	0.713405	0.704147	0.388158	0	0.717131	0.724189	0.600223
CpG_312	chr11	101165623	-	0.824604	0.941691	0.885852	0.83592	0.918605	0.833476	0.858293	0.832721	0.857567	0.854424	0.944521	0.887899	0.889801	NA	0.884501	0.858388	0.873373	0.866485	0.906031	0.881317	0.913827	0.897129	0.888278	0.89165	0.908519	0.847215	0.915793	0.860068	0.854786	0.870621	0.837357	0.899015	0.914745	0.92454	NA	1	1	0.902985	0.923779	0.903574	0.934683	0.785479	0.65	1	1	0.863255
CpG_313	chr11	101165638	-	0.843975	0.908644	0.891863	0.886197	0.860349	0.845823	0.854267	0.844512	0.872875	0.832068	0.900277	0.879643	0.854631	NA	0.842319	0.88671	0.860602	0.845157	0.903994	0.835644	0.881768	0.866527	0.875923	0.937376	0.950829	0.889655	0.856716	0.841169	0.868824	0.856745	0.863989	0.892033	0.894292	0.914295	NA	1	1	0.925528	0.900148	0.899538	0.919118	0.934211	1	0.924901	1	0.903253
CpG_314	chr11	101165647	-	0.903071	0.943689	0.964171	0.937775	0.935323	0.912521	0.876812	0.883394	0.940133	0.933908	0.93361	0.928731	0.919883	NA	0.880788	0.942294	0.922714	0.873555	0.964311	0.918655	0.942833	0.920573	0.930466	1	0.965123	0.950062	0.945502	0.93142	0.932785	0.942675	0.943131	0.936059	0.936536	0.959558	NA	1	1	0.952834	0.932333	0.928681	0.963235	0.934211	1	1	0.917526	0.932815
CpG_315	chr11	101261901	-	0.720243	0.687834	0.661685	0.655467	0.631268	0.660938	0.682371	0.731749	0.71752	0.691554	0.69635	0.683623	0.720494	0.674589	0.618933	0.732265	0.638997	0.6663	0.65861	0.621104	0.631128	0.630908	0.618384	0.627179	0.603721	0.626763	0.644653	0.624887	0.652382	0.650485	0.692322	0.623092	0.67336	0.676326	1	0.741425	0.731412	0.654788	0.638009	0.658831	0.623583	0.700377	0.623421	0.779733	0.647302	0.692373
CpG_316	chr11	101262011	-	0.262797	0.236743	0.216327	0.28838	0.284314	0.213462	0.209361	0.273861	0.27014	0.313433	0.251636	0.259654	0.205492	0.175182	0.255898	0.224154	0.157784	0.177656	0.22406	0.249357	0.216528	0.256072	0.249712	0.191917	0.265582	0.237288	0.250105	0.232076	0.242628	0.217601	0.247203	0.188238	0.190018	0.207981	0	0.3	0.17614	0.196928	0.180484	0.173592	0.169822	0.283975	0.1693	0.212574	0.125653	0.220353
CpG_317	chr11	102606266	-	0.0397878	0.0045045	0.0338983	0.102564	0	0.0506757	0.101695	0.0594059	0.0246914	0.0357143	0.0753968	0.0600707	0.0103093	0	0.0608696	0.0652174	0.0463576	0.0204082	0.0106762	0.0527108	0.0677966	0.0419162	0.0207668	0	0	0.0493653	0.0486322	0.0782313	0.0506135	0.0374707	0.0622066	0.0430712	0.0629371	0.0962441	NA	NA	0	0.0642202	0.0666667	0.0248344	0	0	NA	0	0	0.0749507
CpG_318	chr11	102606278	-	0.0608466	0.045045	0.0989761	0.11859	0.00520833	0.0508475	0.135135	0.0788177	0.0931677	0.0923077	0.0671937	0.0140351	0.121107	NA	0	0.0519481	0.02	0.0714286	0.121429	0.0556391	0.0811321	0.107356	0.0562701	0	0.0866667	0.0815752	0.18541	0.0898305	0.0995406	0.119159	0.0973036	0.134579	0.0522648	0.0864486	NA	NA	0	0.0945122	0.0373984	0.0727273	0	0.303571	NA	0	0	0.108268
CpG_319	chr11	102606283	-	0.0822281	0.0538117	0.210169	0.144231	0.0366492	0.182432	0.121622	0.0640394	0.0833333	0.0918367	0.14	0.176056	0.0962199	0	0.123967	0.168831	0.122112	0.125654	0.120996	0.108434	0.115094	0.144	0.128617	0	0.090301	0.156028	0.161585	0.159864	0.176923	0.284038	0.167651	0.123596	0.109756	0.188679	NA	NA	0	0.0923077	0.157635	0.0945274	0.190909	0.303571	NA	0.251572	0	0.130435
CpG_320	chr11	102606290	-	0.0558511	0.0630631	0.0813559	0.0806452	0.0210526	0.0810811	0.125	0.103448	0.0372671	0.0306122	0.103586	0.00743494	0.120275	0	0.057377	0.131004	0.0879479	0.0871795	0.0357143	0.0589124	0.0244821	0.0878244	0.0779221	0	0.1	0.0663842	0.231003	0.102041	0.0861538	0.100467	0.0552941	0.0992509	0.0696864	0.125592	NA	NA	0	0.0705521	0.0943089	0.0661157	0.186364	0.3125	NA	0	0	0.0536779
CpG_321	chr11	102606294	-	0.0548697	0.0877598	0.0260417	0.0910596	0.0901857	0.116319	0.0518135	0.0680101	0.0520505	0.103896	0.143725	0.0681004	0.0948122	0	0.121849	0.104213	0.140234	0.0870712	0.0477064	0.0859133	0.0699029	0.142272	0.0852649	0.00917431	0.17637	0.138563	0.149444	0.118734	0.120923	0.124096	0.0839416	0.0756705	0.0733696	0.0882353	NA	NA	0	0.108661	0.109349	0.0646809	0.0966981	0.300469	NA	0.100649	0.00892857	0.165306
CpG_322	chr11	102606329	-	0.156038	0.111617	0.222222	0.142157	0.0531915	0.158348	0.184483	0.17	0.0893417	0.104167	0.109533	0.121157	0.0795053	0	0.108787	0.134066	0.166948	0.122396	0.171171	0.116406	0.101879	0.251293	0.089241	0.00952381	0.173838	0.163115	0.241058	0.188879	0.1272	0.241212	0.167806	0.131352	0.135624	0.135103	NA	NA	0	0.106796	0.202181	0.185249	0.0776471	0.313636	NA	0.00321543	0.00869565	0.19877
CpG_323	chr11	102606336	-	0.0518135	0.0540541	0.0405405	0.0722892	0	0.0223642	0.0816327	0.0241546	0.0296736	0.0257732	0.063745	0.0106007	0.0167785	0	0	0.037037	0	0.0659898	0.0350877	0.0445402	0.0146789	0.0340909	0.0122137	0	0.00322581	0.0958722	0.110787	0.0695793	0.0621387	0.105033	0.0603352	0.0617284	0.063228	0.0535714	NA	NA	0.0128205	0.0991254	0.0738462	0.0318471	0.00442478	0.00877193	NA	0	0	0.0777778
CpG_324	chr11	102606347	-	0.0297297	0.0318182	0.119863	0.0516129	0.0625	0.0309278	0.102389	0.0841584	0.078125	0.0824742	0.0705394	0.0535714	0.0452962	0	0.0737705	0.0933333	0.166667	0.0515464	0.0714286	0.0738462	0.0833333	0.107356	0.0177134	0	0.0637584	0.0838068	0.154321	0.0820513	0.0784615	0.0447059	0.072104	0.0787992	0.0662021	0.110329	NA	NA	0	0.0828221	0.131579	0.0714286	0	0.318584	NA	0.00621118	0	0.0710059
CpG_325	chr11	102606350	-	0.0291005	0.0405405	0.0779661	0.0353698	0.0209424	0	0.0353357	0.0301508	0.0650155	0.0510204	0.0436508	0.0498221	0	0	0	0.0655022	0.121622	0.0461538	0.0425532	0.0566616	0.039548	0.0636183	0.011254	0	0.0598007	0.0891089	0.146789	0.0681431	0.0247678	0.0589623	0.0752056	0.0606061	0.0386643	0.0611765	NA	NA	0	0.0948012	0.0804598	0.0746269	0.105505	0.309735	NA	0	0	0.0752475
CpG_326	chr11	102606369	-	0.114667	0.0945946	0.154639	0.157556	0.03125	0.0709459	0.180272	0.0845771	0.0648148	0.122449	0.134921	0.116197	0.0448276	0	0.0909091	0.104348	0.148515	0.0725389	0.0921986	0.110942	0.126415	0.12326	0.0942492	0	0.123746	0.142254	0.146341	0.0940171	0.078341	0.224824	0.0807963	0.106742	0.0763889	0.0985915	NA	NA	0	0.0984615	0.102773	0.0946844	0.0950226	0.451327	NA	0	0	0.116371
CpG_327	chr11	109011697	+	0.914384	0.944272	0.98995	0.965517	0.898104	0.997024	0.92766	0.966184	0.900463	0.912281	0.974286	0.992079	0.994565	NA	1	0.966408	0.934901	0.92654	0.977695	0.958167	0.953089	0.935015	0.960311	1	0.944186	0.909722	0.961728	0.973319	0.937339	0.962821	0.952132	0.942928	0.93416	0.947313	NA	NA	1	0.941985	0.964321	0.948015	0.948478	0.628571	1	1	0.791139	0.943625
CpG_328	chr11	109011709	+	0.963087	1	0.962217	0.961207	1	0.943452	0.991489	0.949843	1	0.966443	1	0.965116	0.938005	NA	0.952381	0.940104	0.964222	1	0.96648	0.972112	0.954233	0.975752	0.972763	1	0.955814	0.953373	0.949507	0.984076	0.969152	0.99359	0.944299	0.974338	0.956938	0.965263	NA	NA	1	0.954128	0.974232	0.962264	0.985948	1	1	1	1	0.98699
CpG_329	chr11	109011714	+	0.97651	0.98452	0.944724	0.956897	0.990476	0.979167	1	0.985893	0.960648	0.919463	0.988571	0.932171	1	NA	0.979545	0.968912	0.971326	0.971496	0.990758	0.959123	0.974828	0.942774	0.94622	1	0.958042	0.951389	0.893827	0.949099	0.966552	0.962821	0.929504	0.944582	0.962786	0.965263	NA	NA	1	0.957187	0.960278	0.978302	1	1	1	1	1	0.964471
CpG_330	chr11	109011736	+	0.837288	0.851393	0.894207	0.881466	0.821853	0.895833	0.87234	0.860502	0.823666	0.875839	0.965616	0.744186	0.886486	NA	0.920635	0.948187	0.883721	0.824228	0.901852	0.880359	0.921053	0.85645	0.890016	1	0.955814	0.849206	0.853086	0.894231	0.906277	0.917843	0.859756	0.908189	0.850191	0.894737	NA	NA	1	0.891437	0.951437	0.903774	0.885246	0.628571	1	1	0.898734	0.90208
CpG_331	chr11	109011754	+	0.947368	0.878444	0.907039	0.960674	0.925786	0.922481	0.93722	0.943568	0.938182	0.89576	0.975976	0.922051	0.98017	NA	0.92426	0.910931	0.899625	0.904229	0.913545	0.902851	0.974453	0.957791	0.946058	0.983122	0.973881	0.910638	0.898635	0.928854	0.922971	0.897049	0.907571	0.96824	0.946346	0.92197	NA	NA	0.977273	0.909968	0.926299	0.949876	0.933168	0.954198	0.972603	0.970588	0.969178	0.925601
CpG_332	chr11	109011765	+	0.855939	0.881804	0.906329	0.915767	0.927885	0.944361	0.91016	0.925256	0.917249	0.89882	0.929799	0.853944	0.949861	NA	0.924571	0.866234	0.906082	0.930318	0.927577	0.948898	0.942054	0.931774	0.92658	0.97619	0.967175	0.918541	0.949257	0.939637	0.950926	0.958656	0.919666	0.929671	0.924111	0.955121	NA	NA	0.978261	0.903226	0.925262	0.959735	0.970379	0.874074	0.975	0.958904	0.958333	0.943717
CpG_333	chr11	109011772	+	0.884255	0.921384	0.840358	0.936009	0.951691	0.943854	0.833333	0.864972	0.878394	0.906303	0.897842	0.816568	0.881706	NA	0.897701	0.957728	0.904505	0.905048	0.934762	0.913934	0.898719	0.916251	0.890669	0.658635	0.931325	0.823112	0.927136	0.922283	0.92193	0.867628	0.869897	0.915852	0.919078	0.954521	NA	NA	0.956044	0.907874	0.92112	0.933237	0.938331	0.689394	0.975	0.986111	0.973941	0.918121
CpG_334	chr11	109011775	+	0.908146	0.957516	0.933162	0.950431	0.943489	0.944785	0.929047	0.941824	0.9	0.947735	0.962099	0.903614	0.972452	NA	0.94023	0.974093	0.921676	0.941748	0.94382	0.954872	0.925837	0.93	0.935118	0.788618	0.961259	0.946447	0.960154	0.95815	0.933393	0.902537	0.925993	0.919218	0.933663	0.933333	NA	NA	0.933333	0.95283	0.937183	0.945312	0.879227	0.952381	0.945946	1	0.967105	0.908847
CpG_335	chr11	109011786	+	0.965986	0.993651	0.904884	1	0.889976	0.932722	0.885033	0.944179	0.915294	0.958763	0.982456	0.948	0.98103	NA	0.963048	0.986911	0.943841	0.924205	0.916045	0.964213	0.974239	0.965209	0.953063	0.811475	0.956627	0.938776	0.977244	0.976087	0.947834	0.906579	0.961366	0.940426	0.967868	0.970427	NA	NA	1	0.970313	0.970195	0.975915	0.944712	0.746269	1	1	0.993548	0.959929
CpG_336	chr11	109011800	+	0.784874	0.78882	0.808081	0.780973	0.877108	0.753754	0.835853	0.766193	0.802326	0.875	0.901449	0.818713	0.779292	NA	0.726437	0.903141	0.763016	0.75179	0.79206	0.824721	0.830607	0.775348	0.677725	1	0.767221	0.739615	0.785	0.803668	0.775261	0.808147	0.797863	0.836134	0.882812	0.836364	NA	NA	1	0.835938	0.828746	0.875836	0.902148	0.367647	1	1	1	0.871454
CpG_337	chr11	109011818	+	0.913644	0.904459	0.875648	0.947846	0.922111	0.858934	0.949561	0.890701	0.907317	0.853659	0.927928	0.867076	0.923944	NA	0.829736	0.844262	0.941392	0.957393	0.87524	0.934715	0.933333	0.907646	0.864475	1	0.933333	0.877175	0.930468	0.918919	0.914261	0.914586	0.869875	0.932994	0.929264	0.944625	NA	NA	1	0.840442	0.923234	0.962963	0.753623	0.714286	1	0.971429	1	0.943599
CpG_338	chr11	114639899	-	0.237907	0.357143	0.388704	0.222136	0.391345	0.264382	0.364126	0.256471	0.405226	0.282315	0.360609	0.272472	0.376111	0.253314	0.394732	0.290804	0.389153	0.312752	0.371964	0.364912	0.342871	0.37787	0.379412	0.335884	0.397617	0.29977	0.296834	0.272516	0.283984	0.27641	0.242747	0.382738	0.401346	0.374921	0.12963	0.374538	0.288576	0.370405	0.379079	0.394351	0.425726	0.411553	0.354802	0.303788	0.280166	0.277403
CpG_339	chr11	114639908	-	0.342229	0.47413	0.492383	0.339003	0.467043	0.347001	0.496252	0.356734	0.524331	0.395822	0.503335	0.38359	0.48953	0.452928	0.522138	0.375021	0.51623	0.437211	0.513555	0.463126	0.467377	0.503479	0.482261	0.456868	0.501623	0.399452	0.40252	0.378769	0.390292	0.395264	0.331227	0.493412	0.524191	0.486327	0.285417	0.432217	0.397261	0.505336	0.503308	0.502453	0.553595	0.526943	0.43908	0.432639	0.427361	0.368292
CpG_340	chr11	114639924	-	0.141301	0.274321	0.277323	0.157565	0.288948	0.16717	0.27919	0.14417	0.289261	0.205758	0.275994	0.184547	0.262252	0.16772	0.2764	0.162879	0.270892	0.241028	0.252839	0.254833	0.264531	0.269467	0.25949	0.246118	0.31018	0.195515	0.191173	0.189094	0.196456	0.192395	0.148897	0.262971	0.28797	0.27559	0.128125	0.275358	0.204476	0.268289	0.28771	0.273493	0.270784	0.268267	0.212839	0.204125	0.192808	0.180702
CpG_341	chr11	114639926	-	0.240303	0.40663	0.402413	0.248286	0.417195	0.257175	0.39419	0.260167	0.442137	0.31524	0.417827	0.298725	0.41427	0.367234	0.423594	0.297264	0.406418	0.333117	0.427027	0.402702	0.40182	0.415812	0.394101	0.36648	0.462809	0.31753	0.330352	0.320519	0.313002	0.331281	0.257074	0.410574	0.437387	0.421506	0.203093	0.383739	0.30758	0.425804	0.42295	0.420268	0.46515	0.435927	0.349346	0.33727	0.294449	0.291626
CpG_342	chr11	114639930	-	0.238676	0.376773	0.392464	0.235542	0.409232	0.248517	0.383859	0.245827	0.408225	0.276188	0.394514	0.273687	0.398386	0.311669	0.400789	0.290003	0.424998	0.337053	0.418275	0.389176	0.384338	0.401498	0.382386	0.356704	0.438216	0.310699	0.294221	0.306912	0.295172	0.297253	0.24366	0.378635	0.417922	0.397551	0.0966084	0.354786	0.314939	0.404482	0.408392	0.405287	0.439249	0.38904	0.439378	0.30764	0.273147	0.291022
CpG_343	chr11	114639935	-	0.321942	0.46063	0.462038	0.327938	0.484184	0.335206	0.4722	0.331704	0.510887	0.372993	0.492781	0.361377	0.468838	0.397631	0.53143	0.353997	0.493442	0.41549	0.476919	0.461203	0.430622	0.482748	0.448722	0.416296	0.483112	0.368585	0.363713	0.351926	0.354089	0.363968	0.307545	0.473302	0.508988	0.46339	0.321613	0.354504	0.399104	0.479037	0.493159	0.486099	0.531414	0.492651	0.475356	0.416072	0.396211	0.365046
CpG_344	chr11	114639967	-	0.47008	0.527252	0.533081	0.438327	0.529202	0.445133	0.537914	0.468991	0.560094	0.482404	0.526003	0.448841	0.5625	0.557437	0.539932	0.461882	0.552982	0.491024	0.55767	0.529243	0.511972	0.536195	0.508144	0.497708	0.561401	0.468305	0.481429	0.507624	0.467662	0.471453	0.432426	0.523291	0.570511	0.526495	0.219713	0.613193	0.458182	0.525591	0.546046	0.526298	0.574234	0.545671	0.496952	0.509802	0.493653	0.469733
CpG_345	chr11	115989747	+	0.509338	0.572674	0.623377	0.417062	0.651072	0.643642	0.590826	0.687196	0.636574	0.473815	0.642105	0.505172	0.640805	1	0.72997	0.433276	0.555404	0.481526	0.583333	0.501239	0.60455	0.62568	0.574423	0.989691	0.32459	0.535111	0.570447	0.483199	0.527502	0.491929	0.415647	0.643255	0.626236	0.603418	NA	NA	0.800699	0.611477	0.604167	0.670886	0.655285	0.394737	0.502463	0.644788	0.742991	0.572301
CpG_346	chr11	115989761	+	0.411565	0.6	0.541908	0.331754	0.551657	0.464678	0.53578	0.564019	0.524362	0.541147	0.534211	0.395869	0.5	1	0.592262	0.39688	0.390411	0.396429	0.491783	0.433526	0.44734	0.486957	0.481481	0.257732	0.542763	0.488	0.467354	0.413655	0.402383	0.506543	0.387853	0.417942	0.508251	0.51649	NA	NA	0.65035	0.607714	0.47379	0.590705	0.521173	0.155894	0.44335	0.534884	0.621495	0.509165
CpG_347	chr11	115989782	+	0.398981	0.476839	0.352601	0.248815	0.393346	0.375786	0.522936	0.298217	0.449074	0.184539	0.351206	0.390706	0.514368	1	0.442136	0.239168	0.342466	0.319048	0.442478	0.289843	0.353196	0.266304	0.305907	0.257732	0.488525	0.261333	0.34633	0.288487	0.304117	0.236336	0.239014	0.346074	0.347625	0.393491	NA	NA	0.800699	0.467043	0.348118	0.469844	0.427642	0.469925	0.935961	0.436293	0.686916	0.401222
CpG_348	chr11	115989791	+	0.620362	0.845417	0.587266	0.602203	0.65035	0.681891	0.728798	0.780347	0.721698	0.653553	0.662216	0.515817	0.736132	1	0.634557	0.577876	0.63947	0.626984	0.750322	0.599744	0.714763	0.648345	0.616254	0.984043	0.659933	0.638278	0.556276	0.577202	0.579789	0.55507	0.514783	0.619184	0.672881	0.704704	NA	NA	0.798923	0.728675	0.644983	0.724743	0.812081	0.664078	0.936061	0.534137	0.754854	0.643357
CpG_349	chr11	115989846	+	0.796265	0.891008	0.76087	0.73031	0.80117	0.809826	0.736648	0.901135	0.87935	0.847118	0.784777	0.709122	0.902017	1	0.83631	0.733913	0.836986	0.777778	0.893805	0.82793	0.809836	0.829694	0.772392	0.989691	0.821782	0.790366	0.778547	0.712264	0.770557	0.856592	0.725668	0.833683	0.816191	0.851215	NA	NA	1	0.816808	0.745442	0.843563	0.944444	0.836502	1	0.529183	0.751174	0.820548
CpG_350	chr11	115989858	+	0.684764	0.741573	0.750367	0.60049	0.643836	0.71246	0.699248	0.719934	0.669811	0.661616	0.712	0.670232	0.517442	0.969697	0.613293	0.692171	0.565957	0.651699	0.778068	0.651299	0.698343	0.649611	0.573404	0	0.627907	0.610811	0.623843	0.555858	0.668914	0.602815	0.549919	0.670654	0.657296	0.723787	NA	NA	0.796429	0.785305	0.714286	0.765909	0.835821	0.630769	0.994898	0.546512	0.743961	0.678169
CpG_351	chr11	115989862	+	0.505983	0.782016	0.679191	0.662679	0.70428	0.583732	0.693161	0.707317	0.666667	0.680798	0.572559	0.593103	0.6	1	0.708333	0.584055	0.582192	0.675481	0.670077	0.60794	0.668113	0.592593	0.575472	0.0103093	0.695082	0.557538	0.608945	0.591946	0.586093	0.545174	0.483733	0.641061	0.680583	0.69395	NA	NA	0.797203	0.68803	0.541582	0.671161	0.837398	0.505703	0.635468	0.532819	0.616114	0.626957
CpG_352	chr11	116945503	-	0.818182	0.966667	0.951456	0.859155	0.865979	0.787879	0.936842	0.927083	0.872881	0.892308	0.87234	0.95	0.975904	NA	0.940476	0.826923	0.96	0.924242	0.913043	0.8875	0.923423	0.825137	0.929752	1	0.971698	0.963801	0.952096	0.937984	0.929167	0.960894	0.940476	0.918182	0.906593	0.930693	NA	NA	1	0.959184	0.892857	0.905405	0.87037	1	0.916667	1	1	0.891753
CpG_353	chr11	116945553	-	0.898089	0.918033	0.940541	0.962121	0.823864	0.992188	0.988764	0.9375	0.90583	0.94697	0.873563	0.929348	0.900662	NA	0.876543	0.955056	0.900901	0.919355	0.91411	0.894484	0.872549	0.891374	0.903073	0.666667	0.82199	0.977157	0.956081	0.909483	0.966825	0.904605	0.911628	0.832461	0.925466	0.877493	NA	NA	0.75	0.928571	0.913545	0.909814	0.868132	1	1	0.921875	0.860465	0.936364
CpG_354	chr11	116945575	-	0.891892	0.847458	0.966667	0.84127	0.903614	0.819672	0.827586	0.916667	0.878505	0.791045	0.840909	0.813187	0.863014	NA	0.9125	0.790123	0.833333	0.949153	0.731707	0.833333	0.814433	0.89404	0.84466	1	0.821053	0.842932	0.843972	0.808036	0.873786	0.808824	0.846535	0.837079	0.858108	0.841463	NA	NA	1	0.876923	0.847561	0.828729	0.904762	0.37037	0.9	1	0.714286	0.875817
CpG_355	chr11	117233094	-	0.558528	0.584582	0.612079	0.539813	0.625	0.600624	0.560773	0.515323	0.626437	0.569767	0.570833	0.523121	0.636996	0.539773	0.561528	0.535141	0.511755	0.517522	0.642398	0.566657	0.561254	0.658362	0.579388	0.632961	0.645933	0.566286	0.561489	0.524008	0.586969	0.553909	0.547874	0.535168	0.596494	0.576016	0.692913	0.726131	0.628571	0.581256	0.511734	0.570154	0.659647	0.634709	0.672026	0.552846	0.619344	0.559491
CpG_356	chr11	117233120	-	0.511719	0.598318	0.578704	0.646922	0.591155	0.525346	0.594444	0.473214	0.57459	0.504132	0.580412	0.454218	0.602076	0.415254	0.538842	0.499499	0.531189	0.561311	0.61518	0.588552	0.55891	0.671727	0.61764	0.614388	0.634632	0.570221	0.577875	0.510366	0.566115	0.548625	0.519059	0.535682	0.584108	0.58031	1	0.790062	0.74329	0.588488	0.547918	0.567058	0.679072	0.721789	0.607768	0.512107	0.624257	0.544388
CpG_357	chr11	117233137	-	0.441667	0.654699	0.474596	0.470418	0.518851	0.424196	0.50103	0.423871	0.437411	0.495466	0.469681	0.292297	0.440221	0.367232	0.427061	0.422211	0.448653	0.486497	0.57211	0.469929	0.454943	0.555578	0.493389	0.461985	0.495279	0.466818	0.460114	0.39074	0.436319	0.458951	0.391675	0.432727	0.5139	0.494953	1	0.788294	0.559215	0.51989	0.463299	0.478969	0.632042	0.649179	0.596547	0.473239	0.551604	0.494086
CpG_358	chr11	118442821	+	0.777072	0.936959	0.955056	0.782056	0.925209	0.889088	0.918543	0.77599	0.935764	0.867222	0.926794	0.828734	0.936228	0.834331	0.927391	0.81661	0.923675	0.88243	0.945593	0.92284	0.910712	0.942483	0.923534	0.922735	0.951191	0.825822	0.816141	0.720559	0.768187	0.803426	0.743268	0.926734	0.946698	0.934792	NA	0.716867	0.812856	0.937529	0.951843	0.950256	0.949917	0.955991	0.834047	0.894902	0.926944	0.897011
CpG_359	chr11	118442832	+	0.58764	0.865179	0.887126	0.599301	0.857752	0.698495	0.89263	0.633025	0.892931	0.693494	0.885591	0.69186	0.885509	0.772455	0.885827	0.688681	0.907341	0.721931	0.912462	0.891447	0.901709	0.890426	0.902876	0.904043	0.868948	0.734523	0.696379	0.641383	0.656931	0.690163	0.659453	0.89599	0.897636	0.884823	NA	0.843373	0.768824	0.886148	0.923188	0.89176	0.927847	0.952854	0.870172	0.575122	0.707486	0.703821
CpG_360	chr11	118442855	+	0.414172	0.753415	0.74284	0.431843	0.757047	0.49552	0.761394	0.41214	0.742165	0.536525	0.787988	0.539905	0.789617	0.672	0.744493	0.502788	0.795341	0.537037	0.773829	0.753643	0.765379	0.770871	0.775682	0.755442	0.730287	0.548284	0.522538	0.468202	0.46529	0.517632	0.470366	0.778799	0.76085	0.778095	NA	0.716867	0.624746	0.756992	0.814117	0.778673	0.777791	0.795739	0.688103	0.542657	0.601252	0.529425
CpG_361	chr11	118442902	+	0.234373	0.622745	0.593388	0.31477	0.639463	0.357258	0.605616	0.308756	0.621972	0.366287	0.642754	0.413493	0.663236	0.631263	0.652654	0.381844	0.663561	0.401607	0.665588	0.624418	0.648553	0.661943	0.641936	0.633661	0.589796	0.426017	0.386386	0.341841	0.338757	0.358709	0.332777	0.6478	0.658836	0.641563	NA	0.319018	0.457975	0.640763	0.692882	0.672984	0.690359	0.630963	0.557112	0.437237	0.416648	0.379534
CpG_362	chr11	118442935	+	0.43998	0.862234	0.885044	0.477963	0.843284	0.557533	0.874646	0.475252	0.868559	0.606385	0.886615	0.589017	0.854586	0.762575	0.8455	0.563291	0.878627	0.600792	0.867446	0.892517	0.891685	0.882903	0.869716	0.822371	0.849804	0.638161	0.610865	0.517901	0.578157	0.568006	0.529943	0.886811	0.891711	0.88541	NA	0.54878	0.607948	0.879808	0.892226	0.895537	0.879408	0.879291	0.841202	0.581748	0.607609	0.580244
CpG_363	chr11	119055962	+	0.00884956	0.00273224	0	0	0.0027933	0	0	0	0	0.029148	0.0334347	0.0309278	0.00490196	0	0	0.03125	0	0.0131868	0	0.0433673	0.0440252	0	0.0183876	NA	0	0	0	0	0	0	0	0.0015748	0	0	NA	NA	NA	0	0	0.012987	0	NA	NA	NA	0	0
CpG_364	chr11	119055971	+	0.00295858	0	0	0	0	0	0.0206186	0	0.00228833	0.00665188	0.0151976	0	0	0	0	0.00260417	0.00582524	0	0.0114943	0	0	0.0282486	0.0183876	NA	0	0	0	0.00248139	0	0.0381679	0.00841751	0.00626959	0	0.0226415	NA	NA	NA	0	0.0111359	0.00739372	0	NA	NA	NA	0	0
CpG_365	chr11	119055981	+	0	0.0028169	0	0.00484262	0.00143678	0.0223881	0	0.018412	0	0.00232019	0.0253968	0.0107383	0	0	0	0	0	0.00788288	0.00596125	0.0271493	0	0.00696864	0.000866551	NA	0	0.0242424	0	0.0140187	0.00137174	0.0963303	0.0010352	0.0238095	0.00284495	0.00239234	NA	NA	NA	0.00248139	0	0.00777778	0	NA	NA	NA	0	0.00931677
CpG_366	chr11	119055996	+	0.00149254	0.0248276	0.0143062	0.0140845	0	0.00445104	0.00130039	0.0133482	0	0.00111982	0	0.0104302	0.0148515	0	0	0.00527704	0.00195886	0.00883002	0	0	0	0	0.0101376	NA	0	0	0	0.0356688	0.00825472	0.0355731	0.00858369	0.0305221	0.00120048	0	NA	NA	NA	0	0.0204313	0.00187266	0	NA	NA	NA	0	0.0235911
CpG_367	chr11	119056002	+	0	0	0	0	0.0153846	0	0	0.00874317	0.00115075	0.0144284	0.00762195	0.00129032	0	0	0.00684932	0.00784314	0.00583658	0.00551876	0.00576369	0	0	0.002849	0.00999286	NA	0	0	0	0	0	0	0.0127986	0	0	0.0340909	NA	NA	NA	0	0	0	0	NA	NA	NA	0	0
CpG_368	chr11	119056008	+	0.0135338	0	0	0.021327	0.00841515	0.011713	0.0154839	0.00878156	0	0	0.00921659	0	0.00493827	0	0.0195804	0	0.0147348	0.00110254	0.0129683	0.00905563	0.0207337	0	0.005743	NA	0	0.0477454	0	0.0175659	0	0	0.00170648	0.0143541	0.00359712	0.0326296	NA	NA	NA	0.0433071	0	0.0103383	0	NA	NA	NA	0	0
CpG_369	chr11	119056012	+	0.00884956	0.0136612	0	0.00820633	0.0111888	0	0	0	0.0183697	0	0.0152207	0	0	0	0.0164384	0.015625	0.0058309	0.0176406	0.00862069	0	0.0223285	0.0254237	0	NA	0	0	0.0307692	0.0298507	0.00460829	0	0.0135478	0.0377953	0.0165485	0.0380952	NA	NA	NA	0.00393701	0.0290503	0.0111732	0	NA	NA	NA	0	0
CpG_370	chr11	119056016	+	0.0206795	0.0109439	0.00557103	0.00936768	0	0.00584795	0.0566281	0	0.0114679	0	0.00916031	0	0	0	0	0.0026178	0.0175097	0	0.00574713	0.0179949	0.0205047	0	0	NA	0	0	0	0	0	0	0.00676247	0.0141621	0	0	NA	NA	NA	0	0	0.0178236	0	NA	NA	NA	0	0
CpG_371	chr11	119056027	+	0	0	0	0.00702576	0.0266854	0.0058309	0.029601	0	0.0280374	0	0.0182927	0.0553411	0.00246305	0	0.0206044	0.0065445	0.00390625	0.0330761	0.00578871	0.0140306	0.0235849	0	0.0014245	NA	0	0	0.0339506	0	0	0	0	0.0127592	0.00118483	0.00190114	NA	NA	NA	0	0	0	0	NA	NA	NA	0	0
CpG_372	chr11	119056034	+	0.00903614	0	0	0	0.00142045	0	0	0.0392157	0.00687285	0.0111235	0.00609756	0.00520833	0.04914	0	0.0492476	0.0198151	0	0.019802	0.0028777	0.0102828	0	0.0847458	0.0042523	NA	0	0	0	0	0.011534	0	0.037225	0.0157356	0.0178147	0.0170455	NA	NA	NA	0	0	0.0121269	0	NA	NA	NA	0	0.00128205
CpG_373	chr11	119056039	+	0.00591716	0	0.0111421	0.0232019	0.00840336	0	0.00771208	0.00656455	0.0251716	0.0336323	0.027439	0	0.0565111	0	0.0191257	0	0.00583658	0.00653595	0.00857143	0.0178571	0	0	0.0213675	NA	0	0	0	0	0.0253456	0	0	0.00940439	0.0117925	0.0229885	NA	NA	NA	0	0	0	0	NA	NA	NA	0	0.0127877
CpG_374	chr11	119056052	+	0	0.0218579	0	0.0164319	0	0	0	0.0261438	0.00228833	0.00444444	0	0.0259067	0.017199	0	0.00819672	0.039267	0.00583658	0.00881057	0.00287356	0.0206718	0.0220126	0	0.0170213	NA	0	0	0	0	0	0	0.0118644	0.0204082	0.0236407	0.0301887	NA	NA	NA	0.0117647	0.0111359	0.0186567	0.0204082	NA	NA	NA	0	0.0102302
CpG_375	chr11	119056055	+	0.0118343	0	0	0	0	0.0348837	0	0	0.00457666	0.015625	0	0.0257732	0.017199	0	0	0.0104987	0.00584795	0.01766	0.00872093	0	0.00315457	0	0.00991501	NA	0	0.138462	0	0	0.0230947	0	0	0.0031348	0.0377358	0	NA	NA	NA	0.0078125	0	0.0148148	0	NA	NA	NA	0	0
CpG_376	chr11	119056057	+	0.0445104	0.00273973	0	0	0	0	0	0	0	0.00445434	0	0.0310078	0.0172414	0	0.00826446	0.0157068	0	0.010989	0.0232558	0.0179487	0	0	0.0269122	NA	0	0	0	0	0	0	0.00168919	0	0.0117925	0	NA	NA	NA	0.0390625	0	0.011215	0	NA	NA	NA	0	0
CpG_377	chr11	119056060	+	0.0117994	0	0	0	0	0	0.0130548	0.0154525	0	0	0	0	0.0915842	0	0.00821918	0.00520833	0	0	0	0.0204604	0.0220126	0	0.00284495	NA	0	0	0	0	0	0	0	0	0	0	NA	NA	NA	0	0.00224215	0	0	NA	NA	NA	0	0
CpG_378	chr12	17993340	-	0.0310016	0.00810185	0.0459689	0.0314961	0.03125	0.0409042	0.0490982	0.040744	0.0546875	0.0525672	0.0476821	0	0	NA	0.05	0	0.0147059	0	0.0131579	0.0393801	0.0343073	0.114464	0.045761	0.0570018	0.0620757	0.0222959	0.0514587	0.0444409	0.0299282	0.0186021	0.0244867	0.00543478	0	0	NA	NA	0	0.03	0.0516129	0.0129032	0	0.02	0	0	0	0.00537634
CpG_379	chr12	17993342	-	0.0373016	0.0103926	0.0311615	0.0116732	0.044878	0.0301399	0.0358566	0.0406002	0.0311688	0.00976801	0.0143979	0	0.0227273	NA	0	0	0	0	0	0.0264253	0.0389537	0.10239	0.0397554	0.0473849	0.0474699	0.029703	0.0327537	0.029548	0.0223949	0.0253278	0.0180522	0.00546448	0.00460829	0.0177515	NA	NA	0	0.01	0.0451613	0.012987	0	0	0	0	0	0.0268817
CpG_380	chr12	17993353	-	0.015949	0.0242494	0.0345557	0.0226601	0.033366	0.00645161	0.00800801	0.0230088	0.0199134	0.0427873	0.0352941	0	0.0227273	NA	0	0	0	0	0.0131579	0.0251903	0.0377465	0.0747337	0.0246336	0.105743	0.03367	0.023827	0.0384381	0.0343341	0.0251103	0.0127217	0.0247082	0.0163934	0.00460829	0.00588235	NA	NA	0	0	0	0.00645161	0	0.02	0	0	0.03125	0.00537634
CpG_381	chr12	17993370	-	0.0294235	0.044586	0.0318246	0.028348	0.0283757	0.021047	0.040857	0.0167993	0.0273438	0.0403423	0.0124836	0	0.0348837	NA	0	0.0634921	0.0149254	0	0	0.0270197	0.0418513	0.0669548	0.0430832	0.0942467	0.0550103	0.0308131	0.0395137	0.0386404	0.0253184	0.025821	0.023323	0.0190736	0.00921659	0.0473373	NA	NA	0	0.04	0.0451613	0.025974	0.01	0.02	0	0	0	0.0080429
CpG_382	chr12	17993376	-	0.00675407	0.0382166	0.044813	0.0282927	0.0336914	0.0237197	0.0333832	0.0102404	0.0333767	0.0134639	0.0294503	0	0.0227273	NA	0	0	0.0149254	0	0	0.0572879	0.0419331	0.0564338	0.039841	0.0632685	0.0131215	0.0419272	0.0276768	0.0251341	0.0242641	0.023191	0.0320328	0.0109589	0.00460829	0.0176991	NA	NA	0	0.02	0.0193548	0.012945	0.0505051	0.04	0	0	0.031746	0.00537634
CpG_383	chr12	17993386	-	0.00402091	0.0075846	0	0.0166751	0.0155936	0.00443459	0.0143959	0.0140145	0.0119258	0.0343075	0.0281501	0	0	NA	0	0	0	0	0	0.0125763	0.00995596	0.0268131	0.0113317	0.066261	0.000245851	0.0154615	0.0151141	0.0116374	0.0110913	0.0140225	0.0110446	0	0.00231481	0	NA	NA	0	0	0.012987	0	0.01	0	0	0	0	0
CpG_384	chr12	17993413	-	0.0298211	0.0127389	0.0400994	0.0273304	0.0390625	0.011963	0.030969	0.0293333	0.0484716	0.0521153	0.0118577	0	0.0229885	NA	0	0	0.0296296	0.0645161	0	0.0265051	0.0490681	0.0664633	0.0289137	0.0664273	0.0182521	0.0250691	0.0579166	0.0407884	0.0231471	0.0206828	0.0290507	0	0.0468384	0	NA	NA	0	0	0.0522876	0.00651466	0.02	0.0204082	0	0	0.03125	0.0027248
CpG_385	chr12	17993417	-	0.021987	0.036643	0.0351195	0.0205927	0.0109726	0.0269379	0.0395538	0.0303305	0.024911	0.0346566	0.0286285	0	0.0232558	NA	0	0	0	0.00819672	0	0.0221659	0.0227006	0.0356222	0.016933	0.0482855	0.0181592	0.0186011	0.0241141	0.0173798	0.0192475	0.0105637	0.0200189	0.0142857	0.0427553	0	NA	NA	0	0	0.0566667	0.0133333	0.0106383	0.0416667	0	0	0.015873	0.0084507
CpG_386	chr12	17993423	-	0.018225	0.02781	0.041844	0.0623145	0.0136719	0.0172228	0.0368526	0.0333333	0.0277537	0.03663	0.042328	0.0208333	0.0227273	NA	0	0.015873	0	0	0.0131579	0.037266	0.0521854	0.0811605	0.0235559	0.0646744	0.0269555	0.0409066	0.0628166	0.0316829	0.0247102	0.0249238	0.0314312	0	0.0506912	0.0118343	NA	NA	0	0	0.0194805	0.0193548	0	0.02	0	0	0.0625	0.0106952
CpG_387	chr12	17993438	-	0.00478469	0.0219146	0.0430183	0.0353288	0.0234375	0.0290323	0.0150301	0.0132275	0.0382276	0.0550796	0.0433071	0	0.0227273	NA	0	0	0	0	0.0131579	0.0358306	0.0339524	0.0798898	0.0242412	0.115127	0.0394041	0.0300256	0.0476577	0.0307668	0.0196198	0.0223894	0.0227411	0.0163043	0.0138249	0	NA	NA	0.037037	0	0.0454545	0.0129032	0.02	0.04	0	0	0	0.0106952
CpG_388	chr12	20197060	+	0.0180921	0.0241546	0.0250329	0.0550747	0.0307571	0.0132646	0.0530252	0.0409396	0.0552448	0.019037	0.0152091	0.0217745	0.012159	0	0.0117994	0.0102715	0.0100457	0.00779661	0.0103359	0.0286076	0.0516807	0.0863673	0.0329466	0	0.049904	0.0248286	0.0401801	0.0725251	0.0289977	0.0414106	0.0632542	0.0196054	0.013256	0.0204923	0	0	0	0.010992	0.017634	0.0174987	0.0128801	0	0	0.0328502	0.000582751	0.0146622
CpG_389	chr12	20197062	+	0.0219298	0.00472144	0.0171504	0.0292028	0.0290652	0.0368732	0.0389262	0.0295104	0.0356643	0.0223214	0.028436	0.0187763	0.0198754	0	0.0052459	0.00944081	0.0130422	0.00370995	0.0120586	0.0337649	0.0451491	0.0791557	0.0435488	0.00193424	0.0499762	0.0182994	0.0263249	0.053735	0.0269417	0.0311585	0.0498642	0.0145491	0.008836	0.0150997	0	0	0.0328947	0.00858715	0.0122578	0.0148756	0.0266052	0.0419622	0	0.0270531	0.00058309	0.0106568
CpG_390	chr12	20197069	+	0.040637	0.0453258	0.0474621	0.0385523	0.0259843	0.0169617	0.030914	0.0449664	0.0496851	0.0178372	0.0540284	0.0161812	0.0175386	0	0.00752864	0.0138081	0.0166616	0.0064276	0.0275862	0.0416456	0.0628667	0.104722	0.0437905	0.0251451	0.0718705	0.034744	0.0356648	0.0531223	0.0155528	0.0492676	0.054489	0.0177945	0.00883184	0.0354995	0	0	0.000730994	0.017826	0.0108404	0.0265453	0.000354484	0.0443001	0.0333333	0.047343	0.0343823	0.0146097
CpG_391	chr12	20197083	+	0.0329128	0.0264901	0.0484085	0.0220299	0.0180676	0.0132743	0.0120887	0.00875421	0.0232558	0.0414798	0.030303	0.0139384	0.0107688	0	0.0104849	0.00545058	0.00546117	0.00712106	0.0172786	0.0260826	0.0437972	0.0593824	0.0248606	0.027833	0.0313987	0.0439845	0.0362369	0.0292356	0.0096985	0.0173333	0.0518721	0.00829771	0.00766871	0.0193808	0	0	0.0643275	0.0188096	0.00758991	0.0174583	0.0354862	0.030124	0	0.0318841	0.0414236	0.00870277
CpG_392	chr12	20197085	+	0.0213816	0.047259	0.0382586	0.0141844	0.0188383	0.0339233	0.0543989	0.0544355	0.0140056	0.0178372	0.0170616	0.00940337	0.00806211	0	0.00887866	0.0101744	0.00848742	0.00269997	0.0138289	0.0197219	0.0227082	0.0448549	0.0188591	0.00193424	0.0547619	0.0352854	0.0180055	0.0324115	0.0120126	0.025846	0.0456932	0.00953696	0.0115607	0.0151015	0	0	0.000730994	0.00998516	0.00571762	0.0150366	0.0304965	0	0	0.0261122	0.0350058	0.00858457
CpG_393	chr12	20197092	+	0.0433114	0.0179415	0.0291777	0.0290881	0.0423529	0.0582167	0.0362416	0.0395708	0.0386236	0.0344828	0.0577652	0.014906	0.00622591	0.107527	0.0294599	0.0225948	0.0184792	0.0185999	0.0207972	0.0389381	0.0371771	0.119261	0.0370714	0	0.0442646	0.0508882	0.0599238	0.0621917	0.0335231	0.0418109	0.0715536	0.0156622	0.0195709	0.0246114	0	0	0	0.0300792	0.029319	0.0250225	0.028746	0.030124	0	0.040619	0.0658508	0.026208
CpG_394	chr12	20197094	+	0.0100689	0.0317741	0.0140575	0.0346908	0.0164302	0.0259553	0.0244208	0.00845804	0.0734997	0.0452586	0.0574818	0.0169753	0.00517539	0	0.0225325	0.00349773	0.0143569	0.00555193	0.0120033	0.0213392	0.0144928	0.0726141	0.0189061	0.00193424	0.0551367	0.0299673	0.0274066	0.0303506	0.0215009	0.0436268	0.046321	0.00635852	0.0113387	0.0179606	0	0	0.000729927	0.017389	0.0173384	0.0185162	0.02	0.0105945	0	0.0318841	0.00640279	0.015449
CpG_395	chr12	20197099	+	0.0908589	0.0490476	0.054467	0.0504769	0.047845	0.0197983	0.0319946	0.0329148	0.0749912	0.030951	0.0439981	0.0176384	0.0110596	0.107527	0.0181758	0.0225854	0.011157	0.00510204	0.0119774	0.0359964	0.053084	0.111306	0.0298048	0	0.0644692	0.0621874	0.0552604	0.0774286	0.0426127	0.0564879	0.0524694	0.0217516	0.0159702	0.0329393	0.283019	0	0.0335946	0.0233514	0.0199512	0.0293175	0.0736994	0.0456056	0.048227	0	0.00029656	0.024231
CpG_396	chr12	20197112	+	0.0415177	0.0199241	0.0403173	0.0519635	0.0444357	0.0189169	0.0114401	0.00707547	0.0543018	0.0290665	0.0165935	0.00651042	0.0124685	0	0.0110107	0.00910249	0.00472777	0.00304363	0.0159827	0.0204626	0.0223676	0.0827577	0.0240065	0	0.0284349	0.0320513	0.0240544	0.039469	0.0277337	0.0376979	0.0281085	0.0112303	0.00805783	0.0271871	0	0	0.00110457	0.0141796	0.00797607	0.0105875	0.0313725	0.0110021	0.0698324	0.0321481	0	0.0109115
CpG_397	chr12	20197123	+	0.076796	0.074092	0.0389954	0.0713154	0.0898345	0.0804131	0.0236887	0.0826891	0.0827199	0.0747768	0.0692271	0.0290113	0.0159845	0	0.0299902	0.0288374	0.0201742	0.035829	0.0301919	0.0537975	0.0606092	0.139587	0.0577324	0	0.0586273	0.068043	0.0706107	0.0890792	0.0577328	0.0700841	0.0748684	0.0215067	0.0222209	0.0461575	0	0	0.146628	0.0378055	0.0283162	0.0401516	0.0556247	0.0606329	0.0703343	0.0338491	0.0391698	0.0238852
CpG_398	chr12	20197125	+	0.0678571	0.0573732	0.0441953	0.0528391	0.0457594	0.087086	0.0562029	0.0588434	0.0486524	0.046875	0.0413892	0.0279538	0.016694	0	0.00902823	0.0258746	0.00838031	0.0154028	0.0255743	0.04104	0.0691764	0.152367	0.0249797	0.000968992	0.0908439	0.0502228	0.060453	0.0840641	0.0286348	0.0443046	0.0680445	0.0188157	0.0190076	0.0442405	0	0	0.0480734	0.0216249	0.0223277	0.036741	0.0122754	0.0750297	0.0704815	0.00923226	0.0401289	0.0224448
CpG_399	chr12	20197136	+	0.0786795	0.0406116	0.0796431	0.0820189	0.0597484	0.0675775	0.0790007	0.0578151	0.0789197	0.0440602	0.0607211	0.0303522	0.019526	0.108108	0.0106697	0.0267662	0.0171472	0.0143824	0.0337152	0.0560629	0.092429	0.187657	0.0338865	0.0659554	0.0892176	0.0660228	0.0948651	0.111984	0.04	0.0526456	0.0901743	0.0279245	0.0162424	0.0441691	0	0	0.000733676	0.022528	0.0140919	0.0300515	0.0261321	0.0281315	0.000697837	0.0824442	0.0695703	0.0153145
CpG_400	chr12	20197153	+	0.120132	0.0963173	0.0758575	0.0700637	0.101176	0.0786934	0.0698455	0.0263336	0.0615815	0.0870536	0.0694577	0.0279766	0.0306456	0.107527	0.0261952	0.0211063	0.014862	0.00675676	0.0323555	0.0742049	0.0828092	0.163454	0.0627605	0.098646	0.117507	0.0829937	0.128036	0.0992608	0.0681102	0.0692964	0.120148	0.0214447	0.0363701	0.0483092	0	0	0.0950292	0.0395867	0.0240261	0.0286007	0.0152482	0.0525694	0.025	0.049323	0.0629371	0.0212112
CpG_401	chr12	20197159	+	0.0527183	0.0406043	0.0416391	0.0379747	0.0416667	0.0777778	0.0229265	0.0276094	0.0653549	0.0507901	0.0303894	0.0136497	0.0252901	0.10989	0.0183787	0.0130957	0.0154968	0.00474094	0.0203111	0.033967	0.0547222	0.0835322	0.0245997	0	0.064347	0.0494516	0.0467388	0.0794913	0.0280768	0.0464992	0.0651408	0.0168511	0.0187721	0.0345808	0	0	0.0440852	0.0134372	0.017074	0.0260276	0.0522946	0.00948992	0	0.0145631	0.0239906	0.0129297
CpG_402	chr12	20197169	+	0.0392049	0.0210124	0.0270627	0.00635425	0.0244866	0.0634686	0.00946586	0.0235849	0.0524079	0.0386364	0.0358527	0.01239	0.0077404	0.107527	0.0161184	0.0127691	0.00335264	0.00543294	0.0125868	0.021519	0.0384453	0.123408	0.0198228	0	0.0552908	0.0343999	0.0313589	0.0726662	0.0299768	0.0343633	0.0264901	0.015272	0.0104903	0.0275381	0	0	0	0.0149274	0.00750557	0.00978499	0.0238859	0.0106383	0.0333797	0	0	0.00974159
CpG_403	chr12	20615411	-	0.00607698	0.0120259	0.0181932	0.0113544	0.0162866	0.0110396	0.0261348	0.00149031	0.000691085	0.00754717	0.00585938	0.0146217	0.0156142	NA	0.0132174	0.0188077	0.0139353	0.0186891	0.00939597	0.00766747	0.0289459	0.0670347	0.00459418	0	0.0480591	0.0135501	0.0247642	0.0393401	0.00802644	0	0.0161234	0.0206072	0.0210545	0.0414085	NA	0	0	0.0192771	0.0247295	0.0255574	0	0	NA	0	0.131765	0.0207175
CpG_404	chr12	20615413	-	0	0.00732601	0.0187032	0.0170178	0.0201613	0.035747	0.033356	0.0277154	0.0330806	0.0235405	0.0194175	0.0234326	0.01864	NA	0.0159059	0.0148883	0.0113857	0.0237784	0.024032	0.0156627	0.0526316	0.0920437	0.0187023	0	0.153565	0.0369872	0.0424028	0.0451128	0.0159699	0.030303	0.0257302	0.0247416	0.0147775	0.0455953	NA	0	0	0.0383119	0.0208833	0.0268759	0.102828	0	NA	0	0	0.0146194
CpG_405	chr12	20615416	-	0.00941493	0.0109689	0.028768	0.00242915	0.0282031	0.0449954	0.0320382	0.0148478	0.0172771	0.0273843	0.0107527	0.0326053	0.0268503	NA	0.0291363	0.0134181	0.0341572	0.0274582	0.0380254	0.0160901	0.0563991	0.0950156	0.00491679	0.984615	0.141026	0.0277778	0.0305882	0.0707113	0.0231023	0.0134529	0.0536025	0.0376117	0.0427677	0.0638178	NA	0	0	0.054338	0.0441126	0.0556358	0.0618557	0	NA	0	0.133803	0.0486986
CpG_406	chr12	20615423	-	0.0258152	0.0146924	0.030397	0.0130506	0.0129136	0.0841035	0.0479124	0.0165165	0.00902778	0.0208531	0.0233463	0.0368236	0.0359762	NA	0.0466249	0.027967	0.0209908	0.0288562	0.0395003	0.022932	0.0387555	0.127843	0.025984	0	0.0922509	0.0643631	0.0427553	0.0988593	0.00896649	0.0293123	0.0743077	0.0332489	0.0520466	0.0917353	NA	1	0	0.0633867	0.0571478	0.0661097	0.0621762	0.113043	NA	0	0.188679	0.0507528
CpG_407	chr12	20615435	-	0.0107455	0.00456621	0.0298322	0.00970874	0.0282486	0.0538813	0.0328093	0.0126113	0.015895	0.0434372	0.0223518	0.0397853	0.0395869	NA	0.0373186	0.0289855	0.0222593	0.036392	0.036036	0.0157005	0.0517148	0.129209	0.0178098	0.984615	0.0329068	0.0235532	0.0340776	0.0908712	0.0070688	0.0223964	0.0226797	0.0352278	0.0396384	0.0881775	NA	0	0	0.0697535	0.0686761	0.0537809	0.224227	0.0649351	NA	0	0.00234742	0.0386295
CpG_408	chr12	20615447	-	0.0295401	0.032066	0.0539702	0.0315917	0.0596293	0.0689183	0.0431826	0.0193093	0.0165517	0.058463	0.0146771	0.035878	0.0636285	NA	0.0673924	0.0528923	0.0487262	0.0440047	0.0435	0.0437663	0.0255157	0.190587	0.0362675	0	0.172004	0.0731132	0.107143	0.131079	0.0225141	0.014574	0.0571128	0.0571093	0.0606957	0.161645	NA	0	0	0.103939	0.0909714	0.0756879	0.16731	0.133621	NA	0.309524	0.130588	0.0823885
CpG_409	chr12	20615450	-	0.0026927	0.00137426	0.00651163	0.00445164	0.0173178	0.010984	0.00650685	0.00630564	0.0144928	0.0212967	0.00874636	0.0352346	0.0148404	NA	0.0121128	0.0201236	0.0153012	0.0143379	0.0206736	0.0275266	0.0388587	0.0860257	0.0117224	0	0.0339138	0.006393	0.0953516	0.0133835	0.00874085	0	0.0163507	0.014037	0.0140134	0.033591	NA	0	0	0.0203684	0.0169303	0.0229677	0.0464516	0.0691145	NA	0	0.155112	0.0156985
CpG_410	chr12	20615453	-	0.0428764	0.0193638	0.0567618	0.0384149	0.0594463	0.0918274	0.088586	0.026736	0.0328152	0.0580737	0.0445423	0.0563291	0.0682446	NA	0.0559211	0.0546322	0.0473809	0.0423232	0.0626049	0.0414487	0.0601852	0.183203	0.0300723	0	0.214286	0.0711876	0.13023	0.140958	0.0376205	0.0411268	0.0640669	0.0849421	0.0851975	0.177759	NA	0	0	0.10961	0.096253	0.118147	0.0850515	0.0649351	NA	0	0.119104	0.0731172
CpG_411	chr12	20615457	-	0.0188299	0.00365965	0.0362791	0.0131201	0.0221595	0.0127854	0.0122491	0.0137649	0.00418848	0.0150801	0.0242718	0.0193467	0.0255834	NA	0.0328125	0.0255319	0.0184255	0.0166906	0.0369813	0.0329781	0.0228013	0.0622326	0.0189322	0	0.0860806	0.0311126	0.0811287	0.0517529	0.0306676	0.0190904	0.0420007	0.0205781	0.0420402	0.0849775	NA	1	0	0.0477836	0.0436345	0.040362	0.092545	0	NA	0	0.131765	0.0339054
CpG_412	chr12	20615471	-	0.0182125	0.0174072	0.0238908	0.0125405	0.00887097	0.0274725	0.00647139	0.00557621	0.0173491	0.0179584	0.022871	0.0220006	0.0156627	NA	0.022542	0.0218434	0.018053	0.0194314	0.0217391	0.011279	0.0258644	0.0804688	0.0117871	0	0.0700461	0.0180456	0.0248374	0.0374555	0.00801509	0.00225734	0.0388996	0.0259893	0.0271777	0.0679831	NA	0	0	0.0437068	0.0313759	0.0436673	0.0425806	0.112798	NA	0.004	0.0626478	0.0385491
CpG_413	chr12	20615473	-	0.024218	0.00137363	0.0264139	0.00486027	0.0272468	0.0240741	0.0193839	0.0141422	0.0144978	0.0181384	0.0174477	0.0193651	0.0178139	NA	0.025512	0.0166195	0.0216753	0.0223068	0.029708	0.0197382	0.0282762	0.0788139	0.00606175	0	0.116621	0.0259959	0.0340376	0.0636287	0.0085026	0.0258137	0.027414	0.0316813	0.0404014	0.0617319	NA	0	0	0.0533333	0.0339493	0.0448549	0	0.133621	NA	0	0.134276	0.0487043
CpG_414	chr12	20615480	-	0.0181452	0.0188506	0.0701428	0.0312881	0.0226721	0.0101103	0.00988749	0.0101086	0.0300311	0.0184136	0.0195408	0.0319772	0.0369794	NA	0.0417755	0.0234333	0.0288783	0.0344288	0.036777	0.0378007	0.0455169	0.129702	0.0144707	0.984252	0.132353	0.0399323	0.0697812	0.094177	0.0184006	0.0114416	0.0487719	0.0459779	0.0519004	0.0919133	NA	0	0	0.0691057	0.0495818	0.0677874	0.162127	0.165217	NA	0	0.132701	0.0604423
CpG_415	chr12	20615482	-	0.00202361	0	0.0420037	0.00651731	0.00806777	0.0206138	0.0164722	0.0111815	0.0124438	0.0108902	0.00636008	0.0214014	0.0155333	NA	0.0138576	0.0184103	0.0129599	0.0166165	0.0193688	0.0099553	0.0191886	0.0649862	0.0237913	0.992126	0.0711645	0.0111826	0.0967359	0.042063	0.011119	0.0226629	0.0390707	0.0291185	0.0327624	0.0444792	NA	1	0	0.0369585	0.0383453	0.0411121	0.185137	0.0762527	NA	0	0.048926	0.0336213
CpG_416	chr12	20615487	-	0.0210455	0.0079033	0.0297712	0.0212158	0.0251216	0.047048	0.0294823	0.0258912	0.0303453	0.0304762	0.0206388	0.0555201	0.0275754	NA	0.0409449	0.023475	0.0247691	0.0404465	0.0381833	0.0225919	0.057612	0.110846	0.0313407	0	0.139122	0.0328767	0.0566728	0.0825492	0.02497	0.0461095	0.055218	0.0465804	0.0487177	0.0890862	NA	0	0	0.0639241	0.0532622	0.0468621	0.189295	0.0265487	NA	0	0.228469	0.0421377
CpG_417	chr12	20615500	-	0.0161182	0.00639854	0.0248139	0.0137429	0.0136766	0.0191956	0.0136519	0.00965108	0.0110193	0.0150801	0.0038835	0.0246445	0.0292498	NA	0.00794473	0.0127208	0.0208855	0.0169051	0.0276574	0.00401284	0.0363341	0.0582298	0.00830502	0	0	0.00606469	0.0316901	0.0463659	0.0395108	0	0.0156467	0.0214565	0.0297133	0.0561482	NA	0	0	0.0347513	0.0253121	0.0373646	0	0.0991379	NA	0	0	0.0347549
CpG_418	chr12	20615511	-	0.0268456	0.0312213	0.0329193	0.00731113	0.0385852	0.0795974	0.0639021	0.0141054	0.0533981	0.0480679	0.013579	0.0292156	0.0403309	NA	0.0318339	0.0390348	0.0365955	0.0236856	0.0411647	0.0241061	0.0395664	0.112753	0.0253021	0	0.126374	0.0678763	0.07109	0.0823923	0.0286924	0.00896861	0.0507826	0.0323543	0.0593853	0.0965479	NA	1	0	0.054774	0.048547	0.0441521	0.0462725	0.185345	NA	0	0.131455	0.0465781
CpG_419	chr12	20615513	-	0.0100874	0.0200913	0.0199129	0.0194018	0.0435484	0.0392694	0.0326975	0.0089153	0.00966184	0.0434372	0.0164888	0.0297657	0.0302822	NA	0.0283345	0.0225909	0.0310852	0.0138093	0.0273333	0.0152733	0.0303359	0.121894	0.0256895	0	0.166362	0.0471063	0.0504695	0.0791667	0.0407685	0.0470325	0.0721254	0.0343529	0.0597845	0.0935656	NA	1	0	0.0499551	0.0569036	0.0356436	0.115681	0.185345	NA	0	0	0.0449288
CpG_420	chr12	20615524	-	0.0362416	0.0137112	0.0495356	0.0340081	0.0530547	0.0589319	0.0659415	0.0134429	0.0379049	0.0408357	0.0358875	0.0465506	0.0280133	NA	0.0582231	0.0265123	0.0329831	0.0206441	0.0485537	0.0289972	0.0487805	0.217391	0.0324651	0	0.16819	0.0774457	0.143192	0.08875	0.02015	0.0167973	0.0524852	0.044416	0.0692375	0.150382	NA	1	0	0.081235	0.0523326	0.0654611	0.1491	0.186147	NA	0	0.056338	0.0578512
CpG_421	chr12	24251997	-	0.0228809	0.0645161	0.0421296	0.00910747	0.0733122	0.0430034	0.0244755	0.0343782	0.0237243	0.0714701	0.0706991	NA	NA	NA	0.3125	NA	0.714286	NA	0.75	0.0393169	0.106753	0.028665	0.0415704	0.0103627	0	0.0668712	0.0446058	0.0432484	0.0340852	0.00112233	0.0288248	0.615385	NA	NA	NA	NA	NA	NA	NA	NA	NA	NA	NA	NA	NA	NA
CpG_422	chr12	24252002	-	0.008329	0.0466989	0.0199259	0.0151976	0.00896152	0.00136799	0.0075	0.00354251	0.0202794	0.0226481	0.0298507	NA	NA	NA	0	NA	0.619048	NA	0	0.00634921	0.0307692	0.013104	0.0122233	0.00518135	0	0.00429448	0.0289256	0.0114613	0.00702106	0.0201342	0.0243993	0	NA	NA	NA	NA	NA	NA	NA	NA	NA	NA	NA	NA	NA	NA
CpG_423	chr12	24252004	-	0.0520291	0.0491143	0.00415129	0.0237371	0.032207	0.0280055	0.0312815	0.00717213	0.0268697	0.0579374	0.0211433	NA	NA	NA	0	NA	0.7	NA	0	0.0107527	0.0664353	0.018018	0.0207647	0	0.0108108	0.0282209	0.0103306	0.0219256	0.014021	0	0.0255083	0.0769231	NA	NA	NA	NA	NA	NA	NA	NA	NA	NA	NA	NA	NA	NA
CpG_424	chr12	24252011	-	0.0189873	0.0324149	0.00417633	0.0103912	0.0200528	0.0186079	0.0156883	0	0.0107914	0.0343823	0.025177	NA	NA	NA	0.6875	NA	0.0952381	NA	0.769231	0.0206595	0.0368159	0.0327332	0.00464345	0	0.0018018	0.0123077	0.0258264	0.0200765	0.00501253	0	0.0159318	0	NA	NA	NA	NA	NA	NA	NA	NA	NA	NA	NA	NA	NA	NA
CpG_425	chr12	24252013	-	0.0171607	0.00484262	0.00554529	0.00242424	0.0275424	0.0130495	0.009995	0.0191726	0.00760626	0.0585847	0.014867	NA	NA	NA	0.6875	NA	0.380952	NA	0.769231	0.0111244	0.0496524	0.020475	0.00559579	0	0.057554	0.030656	0.00619195	0.00809139	0.0049975	0	0.0310307	0	NA	NA	NA	NA	NA	NA	NA	NA	NA	NA	NA	NA	NA	NA
CpG_426	chr12	24252027	-	0.00260281	0.0112903	0.000927644	0.0121359	0.0169312	0.00615595	0.0085213	0.0182186	0.014382	0.0430984	0.0140845	NA	NA	NA	1	NA	0	NA	0	0.0111155	0.0367611	0.0509449	0.0082481	0	0.0215054	0.0117284	0.0630817	0.00810682	0.010015	0.00112108	0.0126253	0	NA	NA	NA	NA	NA	NA	NA	NA	NA	NA	NA	NA	NA	NA
CpG_427	chr12	24252031	-	0.0145606	0.025869	0.0161439	0.021805	0.0100158	0.01843	0.00898652	0.029382	0.000896057	0.0424666	0.0212264	NA	NA	NA	0.3125	NA	0.714286	NA	0	0.0126733	0.0346535	0.0417349	0.0234092	0	0.0107527	0.0312692	0.0123839	0.0190204	0.0194903	0.00111982	0.0269273	0.0769231	NA	NA	NA	NA	NA	NA	NA	NA	NA	NA	NA	NA	NA	NA
CpG_428	chr12	24252036	-	0.0239085	0.0379032	0	0.0224107	0.0253432	0.0259918	0.031984	0.0263025	0.0313761	0.0399768	0.014867	NA	NA	NA	1	NA	0.619048	NA	0	0.0206759	0.0544824	0.0367948	0.0298211	0	0.0536673	0.0244798	0.0518135	0.0100095	0.0305611	0	0.0211503	0.692308	NA	NA	NA	NA	NA	NA	NA	NA	NA	NA	NA	NA	NA	NA
CpG_429	chr12	24252043	-	0.0130005	0.0459677	0.0198798	0.0096911	0.0263992	0.00962861	0.0215215	0.0258883	0.0112007	0.0667828	0.033123	NA	NA	NA	0.6875	NA	0.0952381	NA	0.769231	0.0278109	0.0876494	0.0710157	0.0188243	0	0.0107914	0.0387454	0.0290155	0.0200669	0.0126199	0.0302352	0.0241277	0.666667	NA	NA	NA	NA	NA	NA	NA	NA	NA	NA	NA	NA	NA	NA
CpG_430	chr12	24252049	-	0.0240649	0.0583705	0.0137273	0.0171411	0.0305688	0.0320248	0.039477	0.0254001	0.0270088	0.0391469	0.0481262	NA	NA	NA	0	NA	0.714286	0	0	0.0283988	0.0618687	0.0198758	0.0302929	0.00263158	0.057117	0.0491294	0.0298899	0.041941	0.0165226	0.000575374	0.0320165	0.0416667	NA	0	NA	NA	NA	1	NA	NA	NA	NA	NA	NA	NA	NA
CpG_431	chr12	24252061	-	0.0182577	0.0404858	0.024102	0.0152486	0.0422311	0.0199381	0.0295443	0.0185091	0.0211664	0.0448196	0.0310657	NA	NA	NA	0.6875	NA	0.714286	0	0	0.0228228	0.0285714	0.0209118	0.0100671	0	0.0561086	0.00679642	0.0617801	0.0349061	0.00252334	0	0.023334	0.708333	NA	0	NA	NA	NA	0	NA	NA	NA	NA	NA	NA	NA	NA
CpG_432	chr12	24252068	-	0.0209369	0.048026	0.0483946	0.0202206	0.0392261	0.0137694	0.0643777	0.00561798	0.00678119	0.0697743	0.0486166	NA	NA	NA	0	NA	0.619048	0.625	0	0.0123058	0.056391	0.0365904	0.0195056	0	0.0347667	0.0325279	0.0116034	0.0315534	0.0322008	0.0267349	0.0213964	0.666667	NA	0	NA	NA	NA	0	NA	NA	NA	NA	NA	NA	NA	NA
CpG_433	chr12	24252071	-	0.0112891	0.0252238	0.0141564	0.0349908	0.0575114	0.018959	0.0183417	0.0364889	0.0211604	0.040864	0.00591949	NA	NA	NA	0	NA	0	0	0	0.0119578	0.0654371	0.0637766	0.00978408	0	0	0.0233955	0.047619	0.028001	0.0144633	0.0148997	0.0184621	0	NA	0	NA	NA	NA	0	NA	NA	NA	NA	NA	NA	NA	NA
CpG_434	chr12	24252073	-	0.0138962	0.0275974	0.0256112	0.048878	0.0439414	0.0131034	0.0128886	0.0163557	0.00384877	0.0325991	0.0276352	NA	NA	NA	1	NA	0.0952381	0	0.769231	0.0215856	0.0254582	0.00582605	0.0197655	0	0.0318761	0.0228554	0.0120862	0.0259042	0.0201531	0.0101868	0.018623	0.68	NA	1	NA	NA	NA	0	NA	NA	NA	NA	NA	NA	NA	NA
CpG_435	chr12	24252081	-	0.0192508	0.0283401	0.0166898	0.0303398	0.0285563	0.017796	0.0180995	0.0227618	0.01578	0.0348028	0.0148903	NA	NA	NA	1	NA	0.714286	NA	1	0.0111023	0.083996	0.0604575	0.00560871	0	0	0.0238824	0.0382231	0.0261656	0.0210843	0.0323661	0.0340363	0.692308	NA	NA	NA	NA	NA	NA	NA	NA	NA	NA	NA	NA	NA	NA
CpG_436	chr12	24252092	-	0.0046729	0.0152856	0.0202952	0.0133901	0.0300474	0.00684463	0.0109726	0.0172239	0.00857401	0.0367133	0.0337785	NA	NA	NA	0.3125	NA	0.0952381	NA	0.769231	0.0059761	0.0662383	0.0122449	0.00956149	0	0.0125224	0.00367197	0.0320579	0.010942	0.011982	0	0.00479351	0.0769231	NA	NA	NA	NA	NA	NA	NA	NA	NA	NA	NA	NA	NA	NA
CpG_437	chr12	24252096	-	0.00676027	0.0144811	0.00876384	0.0243161	0.0242233	0.0246407	0.011994	0.0353535	0.00941282	0.0335843	0.0461659	NA	NA	NA	1	NA	0	NA	0	0.00237624	0.0560238	0	0.00625206	0	0.0107335	0.000611995	0.0165631	0.025702	0.0035035	0	0.0084777	0.0769231	NA	NA	NA	NA	NA	NA	NA	NA	NA	NA	NA	NA	NA	NA
CpG_438	chr12	24252098	-	0.0130141	0.00885668	0.00277008	0.00909642	0.0321222	0.0109141	0.0284289	0.00605449	0.0219436	0.0202664	0.0297572	NA	NA	NA	0.3125	NA	0	NA	0	0.00672468	0.0242215	0.00734694	0.00789214	0	0.0623853	0	0.0154959	0.00857143	0.0104843	0	0.00738552	0.0769231	NA	NA	NA	NA	NA	NA	NA	NA	NA	NA	NA	NA	NA	NA
CpG_439	chr12	24252116	-	0.0176623	0.0112721	0.0176662	0.0322581	0.0195148	0.00614334	0.00499251	0.0147283	0.0116331	0.0422943	0.0156495	NA	NA	NA	1	NA	0.714286	NA	0.769231	0.0166403	0.0687098	0.075102	0.0157895	0	0.0107335	0.0324357	0.0134159	0.0290062	0.0154768	0.0212528	0.0139912	0.0769231	NA	NA	NA	NA	NA	NA	NA	NA	NA	NA	NA	NA	NA	NA
CpG_440	chr12	24252122	-	0.0161039	0.0241352	0.00738348	0.000605694	0.014377	0.00274348	0.0104948	0.00911392	0.0147849	0.0260567	0.0109632	NA	NA	NA	0	NA	0	NA	0	0.0114715	0.0435213	0.0441899	0.0210596	0	0	0.0319018	0.0351603	0.0142789	0	0.0291153	0.0136683	0.615385	NA	NA	NA	NA	NA	NA	NA	NA	NA	NA	NA	NA	NA	NA
CpG_441	chr12	69196873	-	0.00391188	0.000649773	0.00254507	0.00296648	0.00243902	0.00144509	0.00309666	0.00235516	0.00710322	0.00240513	0.00189514	0.00392567	0.000464253	0	0.00368421	0.00576564	0.00444774	0.0021322	0.00224138	0.00374125	0.000875244	0.0039134	0.0031037	0.00398038	0.00252048	0.00264615	0.00355898	0.00126499	0.00431829	0.00120497	0.00308545	0.000735913	0.00162432	0.00203524	0	0.000868056	0.000841633	0.00297349	0.0023477	0.00255606	0.00237311	0.00473859	0.000201776	0.000257965	0.0010377	0.00178781
CpG_442	chr12	69196884	-	0.00912863	0.00943703	0.00170032	0.0122024	0.00269806	0.0020284	0.00133393	0.0044748	0.0086879	0.00614316	0.00380108	0.00157109	0.00324751	0	0.000527148	0.007138	0.00476687	0.00335161	0.00449983	0.00472699	0.00297398	0.00360577	0.00232019	0.00362487	0.00366326	0.00542473	0.00175182	0.00573477	0.000577834	0.0015875	0.00220183	0.00379587	0.00459944	0.00255216	0	0	0.00996771	0.00398439	0.00241736	0.00128123	0.000693428	0.0015809	0.019814	0.000387948	0.000346831	0.00146199
CpG_443	chr12	69196893	-	0.000797607	0.00062422	0.00532896	0.00169062	0.00444237	0.00167973	0.00192308	0.00652272	0.000849979	0.00201157	0.00327381	0.00426814	0.00354689	0.0057947	0.0088518	0.00341463	0.00210763	0.00382297	0.00249252	0.004914	0.00358867	0.00411447	0.00299313	0.00613048	0.00433198	0.00281572	0.00254723	0.00202872	0.00292398	0.00304386	0.00279046	0.00385435	0.00201941	0.00476426	0	0.000859845	0.000416378	0.00626707	0.00333841	0.00353734	0.00782484	0.00504619	0.00200521	0.000126103	0.00256827	0.00354039
CpG_444	chr12	69196905	-	0.00453141	0.00406636	0.00381275	0.00565224	0.00513573	0.00159282	0.00751963	0.00482069	0.00411065	0.0013328	0.0049105	0.00457636	0.00775194	0.0149688	0.00223449	0.00355962	0.00467428	0.00303998	0.00258264	0.00456511	0.00262282	0.00220953	0.00188674	0.000370199	0.00312007	0.00474153	0.00638607	0.00148274	0.00319986	0.00409082	0.00295456	0.00305215	0.00420424	0.0076438	0	0	0.000350336	0.00788604	0.00445407	0.00369444	0.00260287	0.000512942	0.00222177	0	8.65726e-05	0.00271101
CpG_445	chr12	69196911	-	0.001962	0.00651678	0.00403611	0.000298597	0.000122534	0.00318979	0.0025547	0.0070688	0.00412073	0.000671141	0.00508744	0.00183751	0.00233073	0	0.00567207	0.00256191	0.00163849	0.00221222	0.00363165	0.00666381	0.0018373	0.00577832	0.00410367	0.0056214	0.000319761	0.00387306	0.0010661	0.0024441	0.00303207	0.00565916	0.00182294	0.00133142	0.00384367	0.00370872	0	0	0.000354736	0.00334756	0.00344628	0.00194118	0.000426605	0.000359238	0.000613748	0.000327097	0.0050238	0.00328045
CpG_446	chr12	69196914	-	0.00124598	0.00456845	0.00352038	0.000597729	0.00465344	0.00495122	0.00333148	0.0036643	0.00436242	0.0020118	0.000476266	0.00879958	0.00628272	0.000835422	0.00435989	0.00485148	0.000894254	0.0069455	0.0032872	0.00336979	0.00347494	0.00418664	0.00200154	0.00595015	0.00223072	0.00385392	0.00330591	0.00356546	0.00145743	0.00401968	0.00407483	0.0040418	0.00273288	0.00238602	0	0	0.00758596	0.00519111	0.00350503	0.00103017	0.00186372	0.00659921	0.000408747	0.00444241	0.0014892	0.00283126
CpG_447	chr12	69196918	-	0.00310816	0.00147662	0.00392948	0.0026926	0.00318979	0	0.00334859	0.000951588	0.00313304	0.00241708	0.00825528	0.00460103	0.00899848	0	0.00528821	0.00349889	0.00323041	0.00344195	0.00503297	0.00380251	0.00138804	0.00365195	0.00398358	0.00190361	0.00341766	0.00111669	0.00706791	0.00306638	0.00315266	0.00165415	0.00265971	0.00219414	0.00055645	0.00307161	0	0	0.00835909	0.00324432	0.00427454	0.00222776	0.00572945	0.000158894	0.000404449	0.000129786	0.000174695	0.00488053
CpG_448	chr12	69196943	-	0.00353173	0.00312757	0.00203513	0.00120373	0.00333663	0.00160631	0.00381209	0.0052071	0.00492721	0.00552859	0.005903	0.00224304	0.0072864	0	0.00813333	0.00068458	0.00674511	0.00644172	0.00495652	0.00278936	0.00714725	0.00147436	0.0059695	0.0128887	0.00487996	0.00165496	0.00515654	0.00332226	0.00237071	0.00103236	0.00354119	0.00488053	0.00574763	0.00459309	0	0	0	0.009451	0.00724128	0.00463578	0.00810442	0.00592925	0.000102438	0.000262657	0.00171301	0.00773804
CpG_449	chr12	69196968	-	0	0.00390879	0.00212269	0.00568692	0.00146915	0.0112652	0.00753045	0.00164667	0.0022242	0.00373333	0.00381679	0.0107274	0.00439815	0.030782	0.00500395	0.00271324	0.00238095	0.00350289	0.00292851	0.00260306	0.00605531	0.0072088	0.00408387	0.00584578	0.0032964	0.00338025	0.00319373	0.000987925	0.00190278	0.00393152	0.00282176	0.00336576	0.000753405	0.00178458	0	0.000865801	0.00042005	0.00288684	0.00126582	0.00290293	0.00406535	0.000236798	0	0.00335008	0.00466926	0.00341871
CpG_450	chr12	78749631	-	0.000270453	0.010147	0.00469106	0.00209171	0.00662691	0.00466321	0.00242204	0.00654178	0.00338357	0.00241918	0.00424729	0.00439216	0.00208768	0	0.00287099	0.00103711	0.00117302	0.0012131	0.00111428	0.00144464	0.00429594	0.00402612	0.00303214	0	0.00646657	0.00487921	0.00302237	0.00166113	0.00404334	0.00359051	0.00405011	0.00340377	0.00408532	0.00164312	NA	0	0.000188679	0.00365292	0.00277183	0.00136612	0.00166137	0.00126636	0	0.000315557	0.0134153	0.0017166
CpG_451	chr12	78749648	-	0.00472781	0.00186528	0.00161507	0.00597063	0.00648379	0.00293255	0	0.00733643	0.0015387	0.011535	0.00804163	0.00281558	0.00164942	0.00100402	0.00435256	0.00522405	0.00401685	0.00509321	0.00148478	0.00155007	0.0039586	0.00377766	0.00358977	0.0239177	0.00451743	0.00221958	0.00785894	0.00211073	0.00326512	0.00230186	0.00251274	0.00174817	0.00319021	0.00405821	NA	0.00294985	0.000188395	0.00402116	0.00369997	0.00313795	0.00331432	0.0172733	0	0	0	0.00725457
CpG_452	chr12	78749659	-	0.00404858	0.00123967	0.00349181	0.00498392	0.00399401	0.00997764	0.00424435	0.00773119	0.00662048	0.00264784	0.000472367	0.00843882	0.00446961	0.00100503	0.00360231	0.0020778	0.00663933	0.00324445	0.00667738	0.00613623	0.00538737	0.00240538	0.00380165	0	0.00195086	0.00321225	0.00574105	0.00484513	0.00403812	0.00353099	0.00346793	0.00198225	0.00309332	0.00402745	NA	0	0.00037743	0.00269613	0.00689916	0.00385992	0.0059579	0.00295458	0	0.00141777	0.00320097	0.0062768
CpG_453	chr12	78749711	-	0.00512959	0.0059905	0.00214592	0.00966339	0.0026512	0.00257732	0.000756773	0.00833085	0.0053681	0.00198194	0.000236072	0.0065841	0.0110398	0.00100503	0.000358873	0.000115247	0.00343104	0.00272948	0.00680525	0.00406881	0.00143014	0.000981114	0.00280775	0.000239149	0.00231341	0.00384631	0.00085526	0.00155586	0.00284284	0.00399196	0.00301814	0.00433799	0.00425276	0.00176287	NA	0	0.0156338	0.00322649	0.00222343	0.00188649	0.0017079	0.000337098	0.000578035	0.000472292	0.000259269	0.00296169
CpG_454	chr12	78749715	-	0.00945818	0.00557851	0.00416667	0.0037049	0.00249667	0.00412442	0.00884956	0.00704965	0.00445948	0.00264842	0.000707214	0.0026759	0.00254796	0	0.00932568	0.00484709	0.00451423	0.0021374	0.010778	0.00361141	0.00410149	0.00240928	0.00265766	0.000478011	0.00316668	0.00471773	0.00397684	0.00349493	0.00394452	0.00247691	0.00275416	0.00551991	0.00522317	0.00155974	NA	0	0	0.00465584	0.00526094	0.0020141	0.00788057	0.000336956	0	0.000157406	8.66701e-05	0.00702631
CpG_455	chr12	78749720	-	0.0055533	0.00185874	0.00120563	0.0048216	0.00463116	0.0061792	0.00983954	0.00580098	0.00199509	0	0.00565504	0	0.00104462	0	0.00179437	0.0101394	0.00439625	0.00415358	0.00247463	0.00221741	0.00442963	0.00269647	0.00379538	0.00490313	0.00299456	0.00499881	0.00206154	0.000795738	0.00283789	0.00279712	0.00377281	0.00197992	0.00334879	0.00250051	NA	0	0.000376861	0.00279964	0.00465311	0.00413522	0.00292426	0.000505732	0.00867553	0.000471995	0.00362945	0.00342546
CpG_456	chr12	78749739	-	0.00512682	0.0053719	0.00589812	0.00208835	0.000662691	0.0042889	0.000151149	0.011286	0.00230876	0.00749229	0.00259863	0.00265791	0.00521765	0	0.000179824	0.00184247	0.00448693	0.00404572	0.000864411	0.00257414	0.00276362	0.00284746	0.00528984	0.000239292	0.00115656	0.00694197	0.00548235	0.00466886	0.00161275	0.00349681	0.00359959	0.00481177	0.00515974	0.00405904	NA	0	0.000188608	0.00216725	0.00423764	0.00337404	0.00346257	0.000674821	0.0190586	0.0100819	0.000518896	0.00261198
CpG_457	chr12	81686505	-	0.344382	0.528817	0.515029	0.321138	0.53565	0.347545	0.511788	0.372196	0.517921	0.401073	0.456044	0.371806	0.491597	0.429594	0.499837	0.372156	0.533583	0.404835	0.519602	0.515054	0.477099	0.508579	0.488594	0.496437	0.495478	0.396789	0.386148	0.3488	0.346964	0.388788	0.372155	0.522986	0.495403	0.479037	0.310078	0.339472	0.347981	0.537912	0.49895	0.491474	0.536648	0.483465	0.523962	0.358705	0.4328	0.376584
CpG_458	chr12	81686521	-	0.576038	0.736671	0.698381	0.545929	0.75781	0.594671	0.6844	0.599054	0.714364	0.582807	0.657984	0.559515	0.664079	0.719141	0.690562	0.592392	0.706981	0.629138	0.708349	0.689058	0.663546	0.694869	0.672395	0.674766	0.697285	0.577045	0.592546	0.559514	0.565567	0.579967	0.586713	0.704298	0.67689	0.681182	0.605744	0.563479	0.540737	0.722595	0.688772	0.678946	0.698163	0.693981	0.743144	0.62763	0.670045	0.603954
CpG_459	chr12	86307774	-	0.49587	0.582933	0.564962	0.460333	0.552225	0.506924	0.622598	0.481964	0.61181	0.544304	0.604913	0.485633	0.612317	0.479568	0.573179	0.543978	0.590036	0.554162	0.603061	0.558251	0.549841	0.577707	0.575096	0.555371	0.574792	0.537494	0.484557	0.499834	0.495999	0.490132	0.513835	0.556254	0.570657	0.56544	0.684211	0.389918	0.495484	0.570785	0.593346	0.560436	0.549742	0.596194	0.599631	0.565127	0.56306	0.521008
CpG_460	chr12	86307799	-	0.647029	0.716086	0.664443	0.606846	0.648857	0.644215	0.641273	0.675429	0.673786	0.674775	0.69686	0.645312	0.717703	0.691654	0.643686	0.64332	0.678127	0.695511	0.695941	0.662544	0.641057	0.685689	0.670241	0.687764	0.700568	0.679976	0.61662	0.663079	0.665353	0.654416	0.677865	0.656328	0.678466	0.650454	0.871359	0.648841	0.63898	0.653856	0.669651	0.6441	0.663335	0.700518	0.69861	0.680959	0.699232	0.642698
CpG_461	chr12	86307828	-	0.739087	0.751476	0.736001	0.71383	0.707844	0.762281	0.732917	0.73325	0.76686	0.740885	0.77374	0.74418	0.741006	0.760224	0.731707	0.752803	0.730394	0.781985	0.76777	0.745032	0.697414	0.743354	0.732805	0.722776	0.748428	0.764855	0.743901	0.757194	0.767328	0.767337	0.774193	0.709778	0.734855	0.713001	0.961538	0.768614	0.746485	0.721942	0.716141	0.730022	0.70651	0.783343	0.718667	0.741073	0.78152	0.732604
CpG_462	chr12	86307870	-	0.609348	0.630475	0.626602	0.532675	0.569183	0.581059	0.569066	0.572966	0.625	0.639106	0.642743	0.570212	0.671011	0.700154	0.595529	0.598105	0.618868	0.620994	0.624205	0.597941	0.601753	0.644565	0.633947	0.641189	0.686755	0.640985	0.620433	0.606537	0.614964	0.631956	0.614955	0.563024	0.620765	0.62487	0.784689	0.594375	0.665998	0.604806	0.606922	0.619033	0.610589	0.647741	0.640158	0.63939	0.62875	0.620415
CpG_463	chr12	86307880	-	0.559869	0.645257	0.614992	0.521559	0.603942	0.557624	0.585316	0.596511	0.669347	0.574926	0.694589	0.543687	0.637783	0.616538	0.614766	0.55193	0.599537	0.58135	0.578973	0.602285	0.589263	0.623026	0.616582	0.635448	0.6633	0.60273	0.579518	0.590648	0.601562	0.619168	0.594187	0.559039	0.6185	0.600012	0.696172	0.573284	0.642361	0.594759	0.602347	0.597004	0.583899	0.639379	0.606234	0.616481	0.601727	0.577654
CpG_464	chr12	103214558	+	0.197243	0.380821	0.356467	0.18088	0.375333	0.19455	0.360491	0.175805	0.356028	0.234497	0.329896	0.266172	0.370737	0.245035	0.342793	0.197117	0.3496	0.241686	0.34034	0.36286	0.33745	0.379348	0.350242	0.395688	0.444721	0.251545	0.236017	0.222484	0.217184	0.222386	0.205621	0.358795	0.347692	0.369638	0.389381	0.334639	0.319713	0.330646	0.361291	0.339661	0.371149	0.37864	0.476253	0.29494	0.286926	0.229734
CpG_465	chr12	103214577	+	0.454002	0.554277	0.538037	0.38434	0.596202	0.424173	0.575918	0.447849	0.552001	0.449101	0.527292	0.45673	0.570826	0.490213	0.558798	0.412581	0.552117	0.459699	0.556448	0.572804	0.545191	0.594587	0.539757	0.612156	0.633151	0.448992	0.436913	0.447475	0.413339	0.461342	0.462957	0.582252	0.545451	0.556268	0.265487	0.638715	0.551446	0.538158	0.551525	0.544722	0.61859	0.616946	0.677794	0.523843	0.513647	0.429131
CpG_466	chr12	103214638	+	0.245132	0.397095	0.414788	0.243695	0.444062	0.256473	0.428388	0.240872	0.407221	0.284031	0.420812	0.296258	0.4234	0.26948	0.420309	0.259181	0.419589	0.308172	0.437177	0.414248	0.395965	0.428762	0.400875	0.419664	0.456128	0.287206	0.262747	0.258753	0.23887	0.27688	0.266278	0.423398	0.412176	0.411472	0.116592	0.4297	0.343275	0.418356	0.430331	0.427234	0.465297	0.447291	0.507692	0.328381	0.361407	0.29116
CpG_467	chr12	103214652	+	0.19312	0.329031	0.343052	0.185963	0.350986	0.206462	0.348474	0.190206	0.324804	0.23365	0.348124	0.260968	0.350461	0.290504	0.329105	0.191571	0.334492	0.221962	0.329687	0.346523	0.346173	0.381077	0.340198	0.410613	0.394704	0.244809	0.232234	0.210242	0.198143	0.243207	0.225251	0.335777	0.326958	0.348301	0	0.453237	0.255474	0.329393	0.340828	0.322397	0.375738	0.401407	0.423174	0.331745	0.285352	0.230443
CpG_468	chr12	103214655	+	0.281353	0.505466	0.484737	0.251732	0.530185	0.32733	0.516279	0.274514	0.471434	0.35906	0.492559	0.348723	0.505307	0.334268	0.470229	0.293544	0.502869	0.36301	0.516737	0.47724	0.462573	0.508963	0.462295	0.527238	0.530805	0.335834	0.31716	0.315054	0.269458	0.289778	0.296838	0.503834	0.472954	0.473309	0.119469	0.447867	0.435193	0.506607	0.511869	0.514944	0.566676	0.554154	0.634567	0.455653	0.438079	0.352785
CpG_469	chr12	105884838	+	0.132905	0.277701	0.293254	0.118047	0.248899	0.163964	0.286244	0.13617	0.308455	0.204557	0.291693	0.181141	0.273799	0.121354	0.274166	0.143744	0.267818	0.189804	0.272499	0.28179	0.317772	0.318084	0.296601	0.306446	0.322975	0.224761	0.178223	0.169393	0.172906	0.174769	0.170912	0.267707	0.290294	0.274842	0.382677	0.238242	0.151565	0.262625	0.270952	0.292498	0.300059	0.3034	0.31188	0.199501	0.194782	0.162455
CpG_470	chr12	105884857	+	0.225396	0.389167	0.42466	0.203563	0.398661	0.274728	0.40386	0.244868	0.42379	0.283704	0.42379	0.272474	0.440783	0.270925	0.399614	0.253025	0.380544	0.301421	0.430425	0.40765	0.434319	0.459371	0.422542	0.408455	0.433022	0.329918	0.307798	0.280339	0.277562	0.28196	0.278273	0.390759	0.433108	0.406918	0.404724	0.37316	0.259306	0.385711	0.411269	0.428897	0.438844	0.420539	0.443246	0.295588	0.300834	0.276579
CpG_471	chr12	105884863	+	0.124438	0.263624	0.306334	0.103898	0.254688	0.155887	0.291074	0.131747	0.290297	0.155997	0.291553	0.159899	0.295265	0.184573	0.248529	0.122194	0.257066	0.168297	0.291147	0.293846	0.304344	0.335413	0.287137	0.28472	0.319283	0.210054	0.173094	0.16511	0.153858	0.157079	0.158696	0.267367	0.285408	0.268948	0.345912	0.186986	0.168185	0.261684	0.276739	0.293786	0.305023	0.313986	0.297443	0.202782	0.205661	0.154424
CpG_472	chr12	105884891	+	0.101041	0.276769	0.287477	0.0828536	0.270984	0.135068	0.271552	0.131084	0.29737	0.157774	0.288605	0.135742	0.29101	0.0967297	0.277492	0.112069	0.263703	0.172789	0.271672	0.277255	0.299538	0.323699	0.27999	0.286408	0.293849	0.19563	0.145593	0.156406	0.153579	0.16016	0.146153	0.260042	0.300135	0.277644	0.169558	0.235476	0.143704	0.252819	0.256254	0.276487	0.298588	0.274257	0.31894	0.173995	0.162388	0.14891
CpG_473	chr12	105884903	+	0.0819193	0.232598	0.239078	0.076884	0.188396	0.127791	0.245711	0.0798697	0.251037	0.147321	0.267205	0.124332	0.233437	0.0813278	0.222179	0.0947766	0.207953	0.154257	0.243035	0.218301	0.245737	0.263216	0.227255	0.223764	0.243686	0.149186	0.122379	0.117308	0.104775	0.12521	0.115247	0.222219	0.246042	0.237719	0.301041	0.220198	0.13227	0.232585	0.236499	0.25435	0.259867	0.260705	0.28077	0.172057	0.15181	0.13641
CpG_474	chr12	105884928	+	0.101758	0.216118	0.198858	0.0752441	0.203276	0.126408	0.196685	0.105848	0.209053	0.122905	0.227284	0.12205	0.206639	0.0976217	0.195923	0.112866	0.193042	0.125997	0.199715	0.218062	0.228953	0.23926	0.221073	0.238298	0.224265	0.15842	0.136004	0.129565	0.128196	0.145414	0.128947	0.185165	0.20814	0.21074	0	0.183448	0.109345	0.180254	0.181168	0.209438	0.185253	0.199931	0.209763	0.161194	0.12642	0.126639
CpG_475	chr12	111028824	+	0.715825	0.769157	0.768722	0.704743	0.780347	0.670113	0.769066	0.748309	0.711698	0.802303	0.732063	0.715596	0.731629	0.86828	0.815209	0.731116	0.791958	0.744662	0.728756	0.756704	0.74613	0.780476	0.778052	0.849782	0.727307	0.727532	0.716649	0.750913	0.71586	0.745994	0.733453	0.743794	0.763284	0.750767	0.66369	0.984067	0.893461	0.745446	0.780585	0.779531	0.833355	0.787259	0.743712	0.741443	0.835272	0.693958
CpG_476	chr12	111028833	+	0.623663	0.689228	0.756401	0.66731	0.739344	0.702627	0.702703	0.644011	0.677468	0.719582	0.686318	0.658502	0.7008	0.957105	0.69583	0.678774	0.70135	0.689916	0.653482	0.674305	0.680785	0.678895	0.6994	0.788126	0.707911	0.622969	0.681249	0.665906	0.63638	0.658903	0.659012	0.660333	0.679465	0.719263	0.336232	0.741395	0.75445	0.69988	0.738581	0.73066	0.736072	0.76755	0.827694	0.775744	0.718809	0.65345
CpG_477	chr12	111028856	+	0.748663	0.739048	0.762774	0.779923	0.771311	0.702804	0.735502	0.80821	0.793208	0.828897	0.808676	0.734594	0.719298	0.930295	0.793949	0.745283	0.774783	0.750995	0.757103	0.772665	0.730196	0.74688	0.765435	0.81153	0.747142	0.723858	0.756902	0.755061	0.747112	0.760844	0.741601	0.750496	0.766266	0.745823	0.849275	0.851103	0.83657	0.784553	0.772965	0.765829	0.795098	0.809551	0.821828	0.833766	0.837639	0.727189
CpG_478	chr12	111028882	+	0.753856	0.745455	0.779326	0.754083	0.778689	0.76333	0.803127	0.765064	0.798946	0.822519	0.75167	0.702172	0.753392	0.989305	0.82502	0.753075	0.773913	0.795675	0.750836	0.759187	0.745586	0.746295	0.777616	0.851625	0.77667	0.74951	0.784235	0.756795	0.763493	0.740459	0.717565	0.755719	0.756414	0.769701	0.849275	0.893715	0.870237	0.790954	0.790467	0.777099	0.822989	0.848748	0.775396	0.838503	0.825521	0.722858
CpG_479	chr12	111442864	+	0.0380321	0.0636758	0.0896947	0.0357483	0.0779451	0.0532731	0.0634206	0.0400648	0.0588002	0.0435393	0.0958827	0.0540749	0.079865	0.120192	0.0994065	0.0247799	0.0597015	0.0260845	0.0602887	0.0673217	0.0528541	0.0744163	0.0593844	0.136328	0.106964	0.0565389	0.0373514	0.0390644	0.0413873	0.0396198	0.0411433	0.0590774	0.0737483	0.0721872	NA	0.314815	0.0409165	0.0810715	0.0708398	0.0718422	0.124716	0.0922551	0.117936	0.0404858	0.0495595	0.0436644
CpG_480	chr12	111442893	+	0.0719875	0.112591	0.122854	0.057706	0.108078	0.111061	0.104462	0.0984372	0.11857	0.098187	0.127973	0.0874591	0.168378	0.157385	0.116604	0.0790075	0.119858	0.0896426	0.103102	0.113097	0.120358	0.119792	0.104162	0.183379	0.174595	0.0789251	0.0824021	0.0706699	0.0710786	0.0914223	0.0913505	0.113497	0.129013	0.124558	NA	0.316279	0.0305785	0.148817	0.119377	0.108493	0.182928	0.18333	0.250622	0.142101	0	0.0902502
CpG_481	chr12	111442902	+	0.155333	0.227811	0.227523	0.149964	0.240319	0.180291	0.216779	0.178348	0.245586	0.199487	0.277919	0.152585	0.270472	0.502415	0.268123	0.167264	0.279832	0.182599	0.220221	0.241809	0.227856	0.251469	0.207181	0.394951	0.277349	0.207839	0.177598	0.160328	0.165075	0.164985	0.165548	0.224369	0.239649	0.247791	NA	0.314554	0.138158	0.238873	0.247284	0.247921	0.275596	0.269755	0.389747	0.120974	0.279457	0.169706
CpG_482	chr12	111442904	+	0.0775355	0.140886	0.113398	0.0735469	0.119343	0.0850871	0.101238	0.0873354	0.105315	0.099463	0.139581	0.0595261	0.1624	0.18599	0.108706	0.0780408	0.125624	0.100466	0.106099	0.130586	0.125844	0.146157	0.105819	0.193	0.149485	0.095895	0.071425	0.0850555	0.0822579	0.0943172	0.0835079	0.115996	0.12105	0.114532	NA	0.317757	0.104391	0.119015	0.126776	0.117398	0.168381	0.139109	0.081875	0.108053	0.10978	0.0822049
CpG_483	chr12	111442906	+	0.0788067	0.163038	0.180867	0.102655	0.15589	0.145692	0.149757	0.108059	0.218261	0.138196	0.206156	0.128412	0.211184	0.207229	0.188933	0.105769	0.199292	0.126964	0.180985	0.17824	0.163321	0.190068	0.161471	0.266214	0.233618	0.138651	0.120952	0.118653	0.115619	0.132011	0.106567	0.168438	0.201972	0.187302	NA	0.640187	0.133991	0.18204	0.18232	0.19009	0.23904	0.246895	0.493218	0.148599	0.134716	0.143079
CpG_484	chr12	111442911	+	0.0904072	0.136342	0.181922	0.0835701	0.15388	0.130896	0.186704	0.113687	0.140427	0.10503	0.192025	0.156124	0.197911	0.0966184	0.138799	0.103049	0.187533	0.137805	0.175674	0.143363	0.143399	0.174378	0.13395	0.29123	0.201473	0.125115	0.110777	0.107363	0.0929222	0.122889	0.100631	0.139417	0.148334	0.162524	NA	0.637209	0.111613	0.185425	0.178213	0.180879	0.207298	0.299542	0.360075	0.174073	0.204426	0.129706
CpG_485	chr12	111442960	+	0.14592	0.215848	0.285879	0.177926	0.192	0.174977	0.256801	0.196197	0.267544	0.188873	0.268182	0.173225	0.266667	0.333333	0.217565	0.17015	0.247028	0.173337	0.248796	0.218305	0.211414	0.262914	0.222596	0.323107	0.315421	0.202863	0.185663	0.19241	0.176383	0.209164	0.178927	0.233741	0.240621	0.241847	NA	0.320755	0.166392	0.260185	0.244836	0.244836	0.291034	0.312764	0.436567	0.165989	0.259259	0.192301
CpG_486	chr13	24862256	+	0.253135	0.327397	0.361491	0.255183	0.306567	0.291525	0.299458	0.239078	0.322222	0.276104	0.417319	0.203988	0.365838	0.218825	0.349067	0.264333	0.362957	0.268577	0.308757	0.307457	0.306167	0.315012	0.359602	0.341955	0.287109	0.260747	0.235517	0.243891	0.236764	0.226775	0.243328	0.312822	0.359815	0.333062	0.408633	0.184354	0.284193	0.283338	0.330977	0.346645	0.35203	0.317817	0.351993	0.250292	0.25949	0.262265
CpG_487	chr13	24862269	+	0.353602	0.468007	0.402326	0.323175	0.432644	0.343621	0.41023	0.331343	0.486107	0.381384	0.471234	0.357579	0.473988	0.374101	0.486268	0.342379	0.464416	0.401599	0.457238	0.443491	0.430833	0.449144	0.467667	0.423238	0.427865	0.382294	0.34404	0.346107	0.343699	0.307437	0.350361	0.433079	0.469856	0.437963	0.449713	0.365589	0.394385	0.410126	0.442673	0.471886	0.462624	0.428332	0.523964	0.397977	0.370987	0.364615
CpG_488	chr13	25850022	-	0.744094	0.79803	0.815725	0.668493	0.910769	0.807432	0.875312	0.744094	0.786458	0.857143	0.811634	0.78553	0.85489	0.911458	0.855153	0.763948	0.910811	0.874477	0.88189	0.832447	0.820025	0.851739	0.837061	0.748588	0.771415	0.751592	0.747454	0.750275	0.748038	0.793009	0.72351	0.821447	0.837247	0.839293	NA	0.588235	0.741722	0.86166	0.807525	0.842523	0.808077	0.826018	0.925466	0.87464	0.709591	0.769861
CpG_489	chr13	25850073	-	0.881023	0.864198	0.900491	0.884774	0.848998	0.826307	0.933168	0.921435	0.936364	0.825558	0.82964	0.872423	0.884375	0.872727	0.828452	0.927039	0.821138	0.807933	0.897638	0.925631	0.884692	0.868947	0.86575	0.861728	0.873371	0.897238	0.877139	0.887624	0.862714	0.868972	0.866363	0.916645	0.90898	0.909528	NA	0.990385	0.974632	0.899032	0.860493	0.885547	0.884853	0.844275	0.925604	0.969719	0.877311	0.890954
CpG_490	chr13	34876168	-	0	0	0.00698324	0.00149925	0.0170543	0.00223214	0	0	0.00550964	0.0131796	0.0242131	0.00860832	0.00562588	NA	0.0156522	0.00185701	0	0.00899428	0	0.00528169	0.000481928	0.0131796	0.00317909	NA	0	0.0014627	0.00635786	0	0	0	0.00294214	0.00717566	0.00247321	0	NA	NA	NA	0.0168651	0.000349528	0.00269633	0	NA	NA	NA	NA	0.00533224
CpG_491	chr13	34876200	-	0	0	0.000706215	0.005997	0.0178433	0	0	0.000651042	0.00552105	0.00167084	0	0.0070922	0.000698324	NA	0.0120275	0.00326036	0.00362611	0.00486618	0	0.00191627	0.00744119	0	0.00247262	NA	0	0.000488639	0.0123007	0.000729749	0.00638449	0	0.00754593	0.000429	0	0	NA	NA	NA	0	0.0117379	0.00744249	0	NA	NA	NA	NA	0
CpG_492	chr13	34876215	-	0	0	0.0118715	0.00749064	0.00620636	0.0134228	0.00441826	0.022742	0.00692042	0.00825764	0.00365408	0.000707214	0	NA	0	0.00649652	0.00120676	0.0117077	0.00185185	0.00838235	0.00479042	0.0066143	0.00300035	NA	0	0.00731351	0.000906618	0.0121418	0.0179499	0	0.00163506	0.00585547	0.00391995	0.0173024	NA	NA	NA	0.000496278	0.00438673	0.00270316	0	NA	NA	NA	NA	0.00409836
CpG_493	chr13	34876255	-	0.0069735	0	0.0112045	0.00299401	0.00621118	0.0178971	0	0	0.00550964	0.00329489	0.00242131	0.0183616	0	NA	0	0.000925926	0.00241352	0.00484653	0	0.000294724	0.000957396	0	0.00352858	NA	0.0954064	0.0004914	0	0.000966184	0.00471921	0	0.00490998	0.00142939	0.00904605	0	NA	NA	NA	0.0168484	0.00244413	0	0.0103093	NA	NA	NA	NA	0.00492207
CpG_494	chr13	43559423	+	0.0443686	0.0830565	0.0847059	0.044164	0.0263158	0.0677966	0.00578035	0.0709534	0.0806045	0.0625	0.0360656	0.0742358	0.0347826	0.157088	0.0414508	0.0755287	0.0558723	0.0265823	0.0318258	0.0437768	0.0588406	0.0771084	0.0414453	0.0339388	0.091227	0.0470885	0.0466225	0.0536472	0.0381208	0.0471819	0.0460769	0.0317676	0.0528587	0.0542467	0	0.153137	0.0862603	0.0522747	0.048103	0.0446326	0.0510278	0.0553462	0.0442514	0.0107204	0.0176403	0.0407336
CpG_495	chr13	43559455	+	0.0212947	0.00330033	0.0684274	0.0549451	0.0651558	0.0271817	0.0154494	0.0502232	0.0509317	0.107463	0.0593081	0.0284464	0.0118919	0.0755814	0.0377358	0.0429312	0.0487945	0.0283019	0.0359231	0.0550043	0.0310755	0.0561749	0.0443506	0.0409274	0.0514834	0.0535173	0.0323471	0.0389374	0.030461	0.0340305	0.0428525	0.0375889	0.0390525	0.035796	0	0.10541	0.0316801	0.0494715	0.0296963	0.0429121	0.0517101	0.015982	0.104733	0.0130152	0.0271802	0.0331147
CpG_496	chr13	43559490	+	0.003367	0	0	0.015528	0.00140056	0.0265734	0.012605	0.00440529	0.00982801	0	0	0.0130719	0	0.0576923	0.00124844	0.00445434	0.0147392	0.00249066	0.0107527	0.00622084	0.00844305	0.0127465	0.00965759	0	0.0240385	0.0073046	0.0153785	0.0066762	0.00391712	0.00668253	0.0078444	0.0060427	0.0116192	0.0142928	0	0.00185185	0.000259943	0.00859518	0.0077502	0.00747537	0.0152886	0.00802834	0.0133745	0.000431965	0.00581564	0.00938027
CpG_497	chr13	43559496	+	0.00166667	0.00318471	0.00934579	0.0123457	0	0.0250696	0.0134409	0	0.00241546	0.00874636	0.0188088	0.012766	0	0	0.00235294	0.00280899	0.00892857	0.00120192	0.00325203	0.00799779	0.0151515	0.00886103	0.0156033	0.0316721	0.0091954	0.0045221	0.00799381	0.0062182	0.0076428	0.00636943	0.0056902	0.0107725	0.00394928	0.00472162	0	0	0.0223261	0.00776699	0.0132509	0.00485544	0.0112095	0.00792317	0.0151702	0.00129199	0.0101039	0.00456242
CpG_498	chr13	55450673	+	0.225598	0.523651	0.537571	0.216477	0.583871	0.299672	0.534195	0.255868	0.596093	0.316148	0.551627	0.310423	0.550725	0.346997	0.576716	0.267375	0.556304	0.320346	0.535532	0.522417	0.550561	0.583694	0.563352	0.529955	0.559025	0.37675	0.322473	0.27775	0.301824	0.290292	0.296917	0.53038	0.562798	0.556054	0.474604	0.440347	0.332827	0.550063	0.584441	0.555852	0.558512	0.514754	0.501199	0.334291	0.329679	0.296166
CpG_499	chr13	55450774	+	0.159785	0.376186	0.426328	0.151476	0.423984	0.192804	0.409636	0.186342	0.422832	0.225969	0.421516	0.222211	0.407043	0.227142	0.397654	0.186553	0.392575	0.209189	0.390785	0.396105	0.423456	0.439806	0.445896	0.399813	0.432542	0.271657	0.231094	0.186223	0.194024	0.196515	0.196132	0.36468	0.418359	0.423927	0.311013	0.282903	0.201828	0.397059	0.425101	0.405109	0.402715	0.352636	0.421665	0.229429	0.229474	0.202007
CpG_500	chr13	60687012	-	0.0985162	0.105176	0.139228	0.102502	0.1052	0.0827437	0.10395	0.113755	0.132094	0.0811362	0.125472	0.114203	0.121874	0.105775	0.127067	0.104835	0.126283	0.112979	0.115246	0.123651	0.129695	0.156922	0.128634	0.132739	0.143754	0.126306	0.117461	0.0940265	0.109135	0.135301	0.0891067	0.107635	0.137241	0.142726	0.0947368	0.207509	0.0918352	0.107338	0.111622	0.106286	0.134174	0.15455	0.151838	0.124573	0.130967	0.115377
CpG_501	chr13	60687050	-	0.182612	0.161771	0.223305	0.186441	0.189338	0.167352	0.170802	0.164366	0.214294	0.163474	0.203364	0.237	0.238571	0.222087	0.226683	0.228024	0.241725	0.249095	0.235142	0.20232	0.221188	0.282183	0.222792	0.227011	0.259981	0.234968	0.222022	0.196646	0.211129	0.247356	0.162193	0.223369	0.261024	0.284076	0.348255	0.406302	0.264795	0.238921	0.237467	0.229585	0.281757	0.306612	0.274156	0.265703	0.268516	0.241763
CpG_502	chr13	60687061	-	0.22759	0.237113	0.300218	0.231378	0.25906	0.198448	0.227102	0.225575	0.282415	0.228621	0.25966	0.395436	0.38803	0.332007	0.363673	0.368987	0.374925	0.427236	0.360175	0.292226	0.266461	0.34794	0.292263	0.265346	0.31297	0.314867	0.323306	0.27611	0.294212	0.328652	0.250048	0.364755	0.388868	0.431237	0.386303	0.549172	0.388883	0.348109	0.367423	0.351605	0.415992	0.427476	0.338604	0.44122	0.405183	0.393915
CpG_503	chr13	60687073	-	0.162446	0.163154	0.20449	0.155875	0.153716	0.132652	0.144676	0.166003	0.16618	0.144847	0.167969	0.246033	0.220043	0.194462	0.229236	0.241898	0.244041	0.242065	0.230709	0.175321	0.179374	0.239512	0.1862	0.171777	0.218262	0.192776	0.206935	0.179464	0.197044	0.234753	0.143934	0.218713	0.250299	0.274557	0.186202	0.437926	0.246969	0.227501	0.23748	0.225298	0.289796	0.272405	0.24002	0.256608	0.258331	0.25038
CpG_504	chr13	60687110	-	0.159595	0.147586	0.191848	0.159718	0.16157	0.132903	0.155533	0.165122	0.176626	0.132768	0.163496	0.161155	0.168077	0.209345	0.173609	0.169118	0.170732	0.162694	0.154435	0.173047	0.175169	0.219613	0.170496	0.181415	0.204486	0.188168	0.18128	0.146914	0.177445	0.186603	0.141299	0.163728	0.182758	0.199105	0.192661	0.361333	0.177523	0.159419	0.14574	0.146063	0.172321	0.216981	0.185974	0.189391	0.156252	0.160922
CpG_505	chr13	97070967	+	0.316878	0.233207	0.312941	0.319127	0.192123	0.338327	0.180556	0.327602	0.262411	0.324965	0.285519	0.27427	0.174954	0.402685	0.196102	0.22974	0.215565	0.198151	0.200143	0.250392	0.262422	0.281703	0.237691	0.224706	0.320537	0.304121	0.292977	0.270822	0.313682	0.327725	0.260509	0.19814	0.171717	0.215307	NA	0	0.0816327	0.180341	0.21771	0.195122	0.199295	0.152331	0.244898	0.325859	0.25827	0.222082
CpG_506	chr13	97071006	+	0.449158	0.371154	0.282574	0.369726	0.288824	0.469994	0.18867	0.379753	0.316823	0.402525	0.35124	0.272076	0.285914	0.362416	0.26319	0.339857	0.316448	0.322759	0.214569	0.330395	0.329433	0.368164	0.285993	0.505672	0.531021	0.411878	0.410844	0.323586	0.385736	0.388697	0.359145	0.283158	0.285519	0.315315	NA	0	0.272158	0.300753	0.280968	0.352197	0.322563	0.342264	0.417323	0.410453	0.403131	0.337589
CpG_507	chr13	97071017	+	0.0801336	0.072473	0.0585922	0.062435	0.0794033	0.142411	0.121842	0.108527	0.0595027	0.111654	0.0417237	0.0543735	0.0600739	0.066778	0.0389294	0.0811616	0.0326757	0.0636758	0.0627706	0.0522285	0.0591325	0.0601422	0.064523	0.164311	0.0612293	0.0808696	0.0617647	0.061677	0.0756846	0.0816464	0.0705637	0.0738718	0.0513164	0.061605	NA	0	0.0204918	0.0665115	0.0628237	0.0703875	0.0825071	0.0213957	0.244898	0.239521	0.0184831	0.0611568
CpG_508	chr13	97071038	+	0.202472	0.182998	0.0983024	0.179781	0.100194	0.243446	0.0865241	0.20528	0.148016	0.193548	0.193416	0.0851869	0.0970739	0.286913	0.0542683	0.142005	0.102374	0.113696	0.113343	0.114577	0.11744	0.109302	0.111016	0.140496	0.13961	0.14902	0.15068	0.108576	0.1439	0.117362	0.117593	0.0900872	0.0747914	0.0896686	NA	0	0.12666	0.0776604	0.100467	0.102345	0.114417	0.101913	0.246787	0.089955	0.1377	0.129093
CpG_509	chr13	97071053	+	0.204956	0.0928753	0.136113	0.196242	0.0675024	0.12375	0.0338308	0.121597	0.118327	0.197203	0.127747	0.0907372	0.109677	0	0.0410959	0.153617	0.0802469	0.11336	0.124375	0.119244	0.0801094	0.0629067	0.0936298	0.0699052	0.0837989	0.143854	0.116716	0.124831	0.148895	0.115854	0.105978	0.069655	0.0803945	0.0884477	NA	0	0.211499	0.084924	0.09699	0.102491	0.0750177	0.110158	0.241026	0.130827	0.103404	0.0855598
CpG_510	chr13	97071061	+	0.0427236	0.0481622	0.0196696	0.0410526	0.0500491	0.042394	0.0367063	0.0562103	0.00620567	0.108939	0.0385144	0.028436	0.056325	0.174497	0.0158151	0.015625	0.0142415	0.0289184	0.0399429	0.0266667	0.0382215	0.0405573	0.0318471	0.209658	0.0622098	0.0365112	0.0503306	0.0324658	0.0456671	0.0472547	0.043376	0.0322165	0.0324791	0.04	NA	0	0	0.0395656	0.0408027	0.0500177	0.0258133	0.0224127	0.244898	0	0.0428663	0.0328549
CpG_511	chr13	97071063	+	0.0234584	0.0266497	0.0369788	0.0167364	0.0182517	0.00250941	0.0530531	0.0326087	0.00800712	0.0125698	0.0274348	0.00571973	0.0277264	0	0.0184275	0.0208799	0.0154799	0.0145096	0.0136103	0.00940808	0.00156006	0.012078	0.0387564	0.0449704	0.0334417	0.0194937	0.0169118	0.0327869	0.0363837	0.0339674	0.0138526	0.0221936	0.0233114	0.0162016	NA	0	0	0.00738151	0.0230615	0.0241306	0.00886525	0	0	0	0.00191816	0.0257061
CpG_512	chr13	107680956	+	0.461995	0.75463	0.824534	0.532383	0.752072	0.657371	0.807899	0.519504	0.866783	0.712883	0.871375	0.627358	0.785152	0.633094	0.82691	0.656657	0.757417	0.683141	0.7775	0.828312	0.798074	0.861792	0.840916	0.909151	0.916147	0.705177	0.738995	0.623584	0.675251	0.712577	0.632381	0.762448	0.802638	0.828056	0	0.997403	0.789796	0.786142	0.747254	0.786737	0.868001	0.784637	0.851438	0.718865	0.6752	0.657209
CpG_513	chr13	107680967	+	0.493854	0.763524	0.841837	0.540636	0.724627	0.618577	0.758785	0.511741	0.877598	0.695388	0.844395	0.594456	0.772804	0.5	0.812293	0.641752	0.752675	0.669842	0.782221	0.82486	0.783208	0.855747	0.845228	0.891645	0.896713	0.686648	0.735871	0.601322	0.647361	0.688964	0.619593	0.760734	0.795136	0.810164	0	1	0.753441	0.784759	0.752578	0.780932	0.886417	0.785943	0.885549	0.714949	0.696976	0.638825
CpG_514	chr13	107680976	+	0.445271	0.759601	0.815816	0.502058	0.707154	0.624589	0.766904	0.484127	0.855081	0.683636	0.848018	0.579372	0.785475	0.503597	0.779538	0.60612	0.751374	0.653982	0.760369	0.811848	0.770777	0.839566	0.819799	0.902796	0.875456	0.6713	0.687505	0.581226	0.626299	0.670167	0.590817	0.741647	0.768126	0.805195	0	0.851282	0.790707	0.760874	0.734527	0.757137	0.861025	0.795817	0.887962	0.693347	0.673996	0.623411
CpG_515	chr13	107846892	+	0.234349	0.334631	0.334969	0.22594	0.340735	0.269239	0.383539	0.247377	0.385669	0.27354	0.400097	0.224018	0.370928	0.421875	0.356299	0.256417	0.356941	0.28359	0.353683	0.339753	0.367733	0.406243	0.375461	0.482234	0.426146	0.265172	0.255554	0.208597	0.240138	0.268649	0.244215	0.334251	0.350038	0.340386	NA	0	0.440541	0.354319	0.355404	0.364498	0.383653	0.366354	0.585551	0.466368	0.411937	0.262223
CpG_516	chr13	107846932	+	0.246291	0.295846	0.27614	0.199014	0.275794	0.237807	0.313806	0.219181	0.325139	0.231782	0.299492	0.230757	0.280788	0.584178	0.252451	0.1919	0.25997	0.22795	0.2559	0.312288	0.319804	0.369355	0.327832	0.272608	0.341188	0.252122	0.229075	0.195045	0.210542	0.235762	0.230341	0.253718	0.303843	0.279836	NA	0	0.336158	0.280446	0.28695	0.278752	0.308702	0.204325	0.438247	0.444099	0.166244	0.221499
CpG_517	chr13	107846940	+	0.173076	0.1947	0.196478	0.1424	0.191911	0.158702	0.222325	0.143344	0.238184	0.171437	0.209559	0.151701	0.210822	0.501984	0.181927	0.140855	0.185022	0.148357	0.184851	0.219385	0.214304	0.228353	0.235467	0.110825	0.204481	0.177997	0.160228	0.120041	0.136647	0.157963	0.157384	0.184375	0.216212	0.193811	NA	0	0.114168	0.189875	0.21192	0.199136	0.19505	0.201302	0.084453	0.371079	0.089366	0.151527
CpG_518	chr13	107846957	+	0.382706	0.464534	0.431113	0.332581	0.422304	0.379359	0.457254	0.335438	0.493	0.364212	0.484725	0.330521	0.438988	0.69375	0.376005	0.329717	0.42048	0.327232	0.399711	0.439153	0.448279	0.496984	0.458553	0.234828	0.460894	0.373116	0.342029	0.300414	0.32654	0.3593	0.366716	0.394042	0.411692	0.399192	NA	0	0.489914	0.410998	0.418955	0.413937	0.401505	0.46844	0.547475	0.450593	0.540741	0.326976
CpG_519	chr13	107846991	+	0.0775522	0.100439	0.125368	0.0801435	0.107547	0.088414	0.142682	0.0741442	0.15112	0.0743569	0.162757	0.0701056	0.113922	0.206349	0.111029	0.0733333	0.110463	0.0762747	0.0877007	0.128681	0.127814	0.172222	0.153617	0.105128	0.140914	0.107217	0.0607064	0.0669995	0.0662882	0.09929	0.0756769	0.0973825	0.123606	0.125425	NA	0	0	0.0951253	0.107968	0.10767	0.111995	0.093913	0.0961538	0.178899	0.061569	0.0687008
CpG_520	chr14	25456804	+	0.169985	0.121661	0.135082	0.163706	0.127528	0.163852	0.115085	0.158814	0.128522	0.137602	0.125148	0.132978	0.10723	0.106383	0.104247	0.15971	0.126075	0.12012	0.0924863	0.135532	0.130356	0.144172	0.136228	0.165192	0.149167	0.144454	0.141676	0.150455	0.15118	0.15787	0.160916	0.10877	0.120342	0.120709	0.00169779	0.274272	0.130165	0.0936142	0.112383	0.101919	0.0926222	0.118725	0.097286	0.194075	0.135313	0.13612
CpG_521	chr14	25456831	+	0.355385	0.321591	0.316256	0.358518	0.317895	0.345926	0.309943	0.315957	0.358218	0.314045	0.335772	0.326021	0.30373	0.392529	0.345477	0.377318	0.343632	0.334427	0.328698	0.317781	0.334849	0.330321	0.302083	0.374287	0.330212	0.307867	0.326428	0.293747	0.328705	0.341396	0.32876	0.321378	0.323885	0.319744	0.121622	0.403636	0.352109	0.303496	0.306034	0.29995	0.2841	0.27548	0.335552	0.304353	0.307398	0.332594
CpG_522	chr14	27066003	+	0.643243	0.741935	0.621704	0.648855	0.681443	0.645074	0.617391	0.653103	0.648167	0.626157	0.704577	0.679155	0.655254	NA	0.733822	0.711934	0.622041	0.609464	0.58836	0.619185	0.575248	0.686731	0.601713	NA	0.685466	0.622091	0.648201	0.603925	0.610582	0.591341	0.620413	0.601779	0.617968	0.618482	NA	NA	0	0.616935	0.565322	0.584536	0.606667	NA	0	1	0	0.6761
CpG_523	chr14	27066020	+	0.46124	0.526466	0.449231	0.464103	0.544699	0.484396	0.453947	0.446154	0.496531	0.443539	0.47493	0.456123	0.429251	NA	0.397294	0.395851	0.475167	0.40127	0.47614	0.425654	0.41382	0.456606	0.418568	NA	0.332613	0.390472	0.486351	0.437183	0.416097	0.454352	0.45767	0.423461	0.460862	0.453759	NA	NA	0	0.456507	0.424316	0.453384	0.459459	NA	0	1	1	0.411001
CpG_524	chr14	27066042	+	0.65192	0.628571	0.59164	0.625175	0.63667	0.593705	0.55787	0.60396	0.655983	0.645241	0.630117	0.631148	0.592965	NA	0.583441	0.599123	0.642573	0.586184	0.617021	0.588336	0.593868	0.643362	0.570462	NA	0.518868	0.601577	0.635457	0.599093	0.600663	0.641618	0.590818	0.623217	0.5441	0.578339	NA	NA	0	0.556851	0.54638	0.528947	1	NA	0	1	1	0.567409
CpG_525	chr14	27066047	+	0.384969	0.44382	0.412245	0.35443	0.493802	0.395161	0.399132	0.345455	0.46771	0.397701	0.429752	0.35687	0.376471	NA	0.349515	0.374183	0.455213	0.370463	0.431866	0.376939	0.36727	0.374517	0.335381	NA	0.433333	0.312605	0.315264	0.304935	0.310293	0.411273	0.31839	0.378953	0.398282	0.35248	NA	NA	0	0.375668	0.380041	0.389116	0.447368	NA	1	1	NA	0.394562
CpG_526	chr14	27066106	-	0.449202	0.489011	0.540722	0.388601	0.563526	0.432377	0.598854	0.451765	0.636569	0.445369	0.539062	0.417457	0.568797	0.343941	0.46712	0.392899	0.511396	0.385939	0.490063	0.504815	0.504102	0.497159	0.461916	0.462511	0.514597	0.423046	0.39486	0.42177	0.40057	0.39744	0.429398	0.512642	0.492231	0.487791	0.734568	0.337165	0.44907	0.536437	0.512877	0.514972	0.549612	0.481765	0.46144	0.454392	0.540727	0.434015
CpG_527	chr14	27066131	-	0.621212	0.684211	0.683855	0.688716	0.77701	0.647658	0.746418	0.603774	0.763247	0.699374	0.797403	0.643939	0.625135	0.630675	0.704209	0.691307	0.703897	0.639666	0.692957	0.710315	0.713025	0.704731	0.658838	0.72112	0.718733	0.655737	0.627128	0.658745	0.665858	0.622209	0.660162	0.702506	0.701353	0.711863	0.562986	0.697193	0.630028	0.727598	0.688986	0.697839	0.733535	0.721903	0.667314	0.67071	0.673911	0.684233
CpG_528	chr14	27066145	-	0.491199	0.649123	0.546757	0.509091	0.693103	0.561602	0.715108	0.527559	0.709421	0.546122	0.640625	0.535545	0.610629	0.5459	0.65262	0.499113	0.629842	0.568627	0.611088	0.627985	0.58075	0.631439	0.583149	0.635671	0.636177	0.534967	0.53011	0.545257	0.563334	0.514417	0.566327	0.642831	0.632539	0.629648	0.764431	0.444679	0.512875	0.66213	0.643953	0.615836	0.653182	0.66931	0.673008	0.623084	0.57705	0.5555
CpG_529	chr14	31641037	+	0.000474383	0.00371747	0.00382328	0.00236546	0.00170455	0.00406504	0.00127632	0.00403226	0	0.000655738	0.0014782	0.000575374	0.00117096	0.0011655	0	0.000727537	0.00548509	0.00228683	0.00133422	0.00325218	0.00353326	0.00348303	0.000739463	0.00183934	0.00231192	0.0053286	0.00432104	0.00479976	0.00303816	0.00295704	0.00282505	0.00218864	0.00185001	0.00477655	0.000511509	0.000770119	0.000388368	0.00246002	0.00356034	0.00135213	0.00191225	0.00111029	0.000215874	0.000241036	0.00672177	0.00310582
CpG_530	chr14	31641051	+	0	0.0037092	0.000424989	0.00649351	0.000568505	0.00405954	0.00446429	0.00251762	0	0.00328299	0	0.00574383	0	0.000582411	0	0.00109329	0.00274066	0.00392542	0.00531738	0.00359302	0.00397456	0.00200178	0.00320671	0.00523518	0.00173846	0.00486138	0.00137817	0.00119994	0.00473045	0.00359004	0.00172164	0.00187578	0.00206039	0.00516441	0	0	0.000145264	0.00548049	0.00282434	0.00434112	0.00694255	0.000147995	0.00409983	0.000301187	0.00812198	0.00435424
CpG_531	chr14	31641076	+	0.00805306	0.00148754	0.0083014	0.000887311	0.000852273	0.00509511	0	0	0.000899011	0.00689202	0.000369276	0.000288351	0.000293772	0	0.00207397	0.00672727	0.00342994	0.000652635	0.00216884	0.00197724	0.00345714	0.0012307	0.00277761	0.00307019	0.00275203	0.00296482	0.0038699	0.00304614	0.00161052	0.00809165	0.0024509	0.00235171	0.00181695	0.00317481	0.000512558	0.000192765	0.000557833	0.00236922	0.00196509	0.00362161	0.00120429	0.00100167	0.000577013	0.00332116	0.00174542	0.00474742
CpG_532	chr14	31641083	+	0.000474158	0.00408163	0.00914699	0.000592066	0.00114253	0.0115098	0	0.00177081	0.000299401	0.000656168	0.000369276	0.000575871	0.00766735	0	0.000690369	0.00254684	0.00309651	0.00195886	0.00316192	0.00303564	0.00474522	0.00479126	0.00222593	0.00122244	0.0053135	0.0015484	0.0010134	0.00251918	0.00196806	0.003546	0.00186438	0.00219172	0.00124666	0.00173691	0	0.00533556	0.00305736	0.00108912	0.00585437	0.00271016	0.00528695	7.43909e-05	0.000144201	6.0423e-05	0.00359201	0.00355292
CpG_533	chr14	31641099	+	0.00475059	0.000744048	0.00922747	0.00978068	0.00484055	0.000339098	0.0156951	0.000505433	0.00722456	0	0.00111235	0.0167776	0.00587372	0.0122699	0.00587625	0.0052939	0.00532921	0.00572269	0.00400334	0.00154273	0.00133428	0.00238842	0.00117851	0.000342045	0.00203715	0.00211556	0.00110834	0.000906344	0.00179695	0.000641661	0.00378472	0.00424439	0.00221611	0.00210236	0.00102881	0.00464666	0.00329341	0.00529277	0.00321352	0.00402756	0.00335395	0.00159988	0.000398233	0.00215511	0.00230576	0.00271154
CpG_534	chr14	31641104	+	0.00427655	0.0063197	0.00170104	0.00118099	0.0028401	0	0	0.00907258	0.00359066	0.0019698	0.00295639	0.00143802	0.00442087	0	0.00966184	0.00290645	0.00428596	0.00261011	0.000667111	0.00167033	0.00141693	0.0017454	0.00160365	0.00330483	0.00583892	0.00164842	0.00561875	0.00221779	0.0042905	0.00217631	0.00379729	0.00146206	0.00359917	0.00357788	0.000256345	0.000385877	0.000485048	0.00374071	0.00264949	0.00173879	0.00139661	0.00152173	0.000396568	0.00105727	0.000349423	0.00302997
CpG_535	chr14	31641109	+	0.0101944	0.00408618	0.00063857	0.0035524	0.000853242	0.00272851	0.0064041	0.0121796	0.00780312	0.00461285	0.0166667	0.00747986	0.0011744	0.000583431	0.00276817	0.00619082	0.000171703	0.00293926	0	0.00479838	0.00235158	0.00167604	0.0101435	0.000822484	0.00473338	0.00716739	0.00304569	0.00214641	0.00434335	0.00136453	0.00283521	0.0053392	0.00570898	0.00535357	0	0.000386175	0.0120008	0.0031752	0.0079111	0.00183815	0.00376115	0.00233975	0.00824176	0.0041707	0.00237381	0.00285259
CpG_536	chr14	31641116	+	0.000947418	0.00222883	0.0102171	0.00236827	0.00113895	0.000677048	0.00192802	0.00101317	0.0125673	0.0052459	0	0.000575374	0	0.000582411	0.0172533	0.00290698	0.00822481	0.00716612	0.002997	0.00510159	0.00593814	0.00587492	0.00529948	0.0039646	0.0046341	0.00276571	0.0036972	0.00601413	0.00465199	0.00400534	0.00510979	0.00491632	0.00398832	0.00131139	0.000512558	0.0055277	0.0118429	0.00284657	0.00146185	0.00463813	0.00404836	0.00496664	0.00648649	0.00374374	0.0108761	0.00822405
CpG_537	chr14	31641118	+	0.0132639	0.0104167	0.000424989	0	0.00341686	0	0	0.00403226	0.00718563	0.000655308	0	0.00288018	0.00175541	0	0	0.00655022	0.000685401	0.00488759	0.00531915	0.00122818	0.00177117	0.00535117	0.00556242	0.00224063	0.00057876	0.00282839	0.0037722	0.00292771	0.00367219	0.00405938	0.00310174	0.000729927	0.0026327	0.00366756	0	0	0.000145455	0.00274387	0.00100347	0.00135253	0.00360873	0.000222239	0.000143947	0	4.98504e-05	0.00303277
CpG_538	chr14	31641127	+	0	0.0089153	0	0.00236267	0.00851789	0.0122366	0	0.000505051	0.000600962	0.000655738	0	0.0150202	0.00410557	0.000583431	0.00485774	0.00145932	0.00102951	0.00750163	0.00199667	0.00175778	0.00150642	0.00349885	0.00222167	0.00265626	0.00280329	0.00237373	0.00184196	0.00414188	0.00313255	0.00145071	0.00110589	0.00459386	0.00164133	0.00209822	0.000513347	0	0.00029146	0.000663759	0.00118754	0.00531863	0.00432924	0.00222668	0.00735825	0.0024757	0.000349423	0.00474285
CpG_539	chr14	32599984	-	0.0486876	0.0635569	0.0750623	0.0571166	0.0660408	0.0507643	0.066736	0.0582003	0.0701244	0.0511015	0.0743314	0.0389811	0.0574155	0.0212766	0.0631433	0.0449454	0.079986	0.0487896	0.0674764	0.0771261	0.0784365	0.095325	0.0729606	0.146513	0.108416	0.0753775	0.0716374	0.0495937	0.0514496	0.0861605	0.0553799	0.0684861	0.0800743	0.0839481	NA	0.180617	0.121615	0.0776062	0.0752658	0.070967	0.128006	0.147132	0.200717	0.257072	0.0753734	0.0505609
CpG_540	chr14	32600019	-	0.0282878	0.0472257	0.0697947	0.0387654	0.0491989	0.0546226	0.0515687	0.0397816	0.0563725	0.0451677	0.0654028	0.0358276	0.0501837	0	0.048642	0.0331391	0.0613938	0.0419188	0.0543258	0.0575581	0.0514026	0.0592431	0.0600546	0.108439	0.102926	0.0497521	0.0566231	0.0358182	0.0416233	0.0603122	0.0483935	0.0440804	0.0542162	0.0696896	NA	0.0373626	0.190612	0.0598321	0.0535242	0.0614851	0.113609	0.179462	0.126344	0.158377	0.100834	0.0419048
CpG_541	chr14	32600023	-	0.0263964	0.0470817	0.0567391	0.0337006	0.0330044	0.035475	0.0439144	0.0349332	0.0621488	0.0345014	0.0531132	0.0382991	0.0411066	0	0.044673	0.0320683	0.044302	0.0275407	0.0443645	0.0500254	0.0510875	0.0722352	0.0513102	0.146935	0.0979425	0.0456003	0.0581809	0.0332344	0.0368963	0.0436028	0.033162	0.03474	0.0474893	0.0601186	NA	0.0341786	0.100404	0.0534687	0.0473086	0.0503927	0.0877113	0.106296	0.108455	0.0424735	0.0963143	0.0330917
CpG_542	chr14	32600026	-	0.0260715	0.0327007	0.0336567	0.0270945	0.0218202	0.0271244	0.0258305	0.0304915	0.0351238	0.0290487	0.03254	0.0236259	0.0428481	0.0142349	0.0283113	0.0270972	0.0417155	0.0333584	0.0334037	0.0357111	0.033947	0.0446941	0.0354364	0.106241	0.0679033	0.0327591	0.0277928	0.0217685	0.0187401	0.0268383	0.0348584	0.0237934	0.0379011	0.0462056	NA	0	0.0730485	0.0363439	0.0329201	0.0396391	0.0723906	0.0856785	0.0323935	0.106223	0.0657228	0.0245524
CpG_543	chr14	32600029	-	0.0421892	0.0744019	0.0678985	0.0472426	0.0543557	0.0563473	0.0633714	0.0556012	0.0610369	0.0485717	0.0771173	0.0418837	0.0458744	0	0.050326	0.0486218	0.0614424	0.0314524	0.0600974	0.066515	0.0748909	0.0884591	0.063284	0.159522	0.0991694	0.0646499	0.0712617	0.0435147	0.0498783	0.0715247	0.04756	0.0497367	0.0685316	0.0706912	NA	0.0571429	0.166074	0.0609401	0.061453	0.0640179	0.0457447	0.138067	0.100835	0.106786	0.0880361	0.0424008
CpG_544	chr14	32600050	-	0.086274	0.138892	0.158119	0.085659	0.12093	0.107119	0.14487	0.0935883	0.139162	0.103551	0.154138	0.0858818	0.116627	0.0143369	0.12156	0.101489	0.14218	0.0904422	0.135765	0.122105	0.132772	0.160571	0.131282	0.301107	0.193483	0.107053	0.128445	0.0865107	0.0987181	0.107165	0.0865367	0.118036	0.129986	0.156054	NA	0.314856	0.252448	0.146304	0.119542	0.132172	0.186063	0.251337	0.273931	0.274837	0.159107	0.10517
CpG_545	chr14	32600074	-	0.0819516	0.113204	0.154917	0.0797128	0.128189	0.106463	0.145303	0.101462	0.151619	0.088357	0.186566	0.0684277	0.12381	0.0141844	0.128162	0.10251	0.124563	0.0882975	0.131725	0.129026	0.138621	0.16453	0.128367	0.2533	0.242409	0.117822	0.145207	0.0855035	0.0858532	0.132005	0.0978867	0.125271	0.145545	0.16068	NA	0.0947137	0.276515	0.13443	0.129428	0.140885	0.219575	0.291021	0.347048	0.342051	0.147416	0.0934891
CpG_546	chr14	32600077	-	0.0679995	0.10379	0.131768	0.0599595	0.0894558	0.0779661	0.121477	0.0597372	0.116847	0.074955	0.0984674	0.058956	0.107399	0	0.0935726	0.0675165	0.116721	0.0683431	0.116827	0.109715	0.109653	0.155033	0.0981261	0.272063	0.205907	0.0905565	0.101566	0.066004	0.072267	0.115648	0.0662812	0.0996804	0.119643	0.125358	NA	0.292308	0.131217	0.0982756	0.102048	0.11252	0.190462	0.220719	0.213604	0.273785	0.1437	0.0701364
CpG_547	chr14	32600085	-	0.0277136	0.0337864	0.0463004	0.0220588	0.0370251	0.0288734	0.0402675	0.0183445	0.0431206	0.0315827	0.0427548	0.0189239	0.0270863	0	0.0284353	0.026936	0.0272664	0.0243142	0.0281732	0.0425749	0.0434068	0.0581368	0.0367117	0.159876	0.111579	0.0273875	0.0292512	0.020085	0.0278654	0.0358787	0.0250951	0.0317879	0.0375155	0.0405157	NA	0.127753	0.106486	0.0410433	0.0409706	0.0321176	0.060818	0.0974649	0.00178998	0.106905	0.0552467	0.0213289
CpG_548	chr14	34602957	-	0.825467	0.814758	0.879497	0.783644	0.836465	0.855247	0.838922	0.821441	0.856833	0.840426	0.858452	0.864476	0.90409	0.796719	0.792334	0.828379	0.833367	0.880858	0.916688	0.806719	0.839949	0.85907	0.838672	0.825579	0.829117	0.794187	0.801022	0.775484	0.782716	0.772235	0.791903	0.872377	0.887519	0.890652	0.788036	0.778685	0.911415	0.878336	0.898594	0.881306	0.895616	0.912914	0.876706	0.827356	0.879563	0.862311
CpG_549	chr14	34603033	-	0.730094	0.79173	0.810661	0.706767	0.780612	0.749897	0.777632	0.757812	0.769341	0.795143	0.867451	0.772074	0.822496	0.725921	0.764854	0.775626	0.783484	0.743347	0.803349	0.778923	0.794758	0.793741	0.777896	0.789673	0.770917	0.71948	0.762607	0.717582	0.742452	0.733186	0.741825	0.776825	0.806672	0.800223	0.76943	0.763563	0.776378	0.811692	0.793334	0.818707	0.818655	0.782728	0.780434	0.756505	0.790821	0.758809
CpG_550	chr14	34603037	-	0.903774	0.929507	0.928992	0.872382	0.887993	0.899876	0.924312	0.876016	0.913874	0.928697	0.947742	0.887675	0.897048	0.915074	0.894914	0.910237	0.919524	0.862818	0.893056	0.897963	0.891774	0.918783	0.899737	0.951312	0.908822	0.885227	0.895921	0.867081	0.864701	0.866229	0.88903	0.864036	0.903747	0.862006	0.948187	0.840486	0.86512	0.902232	0.884795	0.910729	0.909266	0.870744	0.95045	0.83371	0.869669	0.880234
CpG_551	chr14	61689950	-	0.861266	0.856051	0.844156	0.822222	0.859712	0.893362	0.769231	0.892039	0.877739	0.841676	0.749196	0.834774	0.792638	0.777778	0.679954	0.801282	0.769334	0.782552	0.72	0.824537	0.833116	0.875706	0.799838	0.926416	0.887319	0.828827	0.862661	0.874138	0.84173	0.880925	0.854945	0.840073	0.810651	0.80322	1	0.682635	0.69346	0.857367	0.870648	0.821746	0.898551	0.918267	0.779975	0.95865	0.923157	0.807596
CpG_552	chr14	61689954	-	0.845149	0.846154	0.864594	0.840449	0.908982	0.869281	0.774156	0.889617	0.875143	0.885284	0.868379	0.798839	0.750309	0.777778	0.704805	0.823362	0.788694	0.780965	0.772786	0.878851	0.830547	0.867953	0.811043	0.882615	0.908236	0.872143	0.886862	0.870925	0.861041	0.91218	0.861117	0.843219	0.831757	0.856433	1	0.842424	0.903978	0.861367	0.848502	0.846742	0.872353	0.898446	0.852174	0.977625	0.960957	0.83912
CpG_553	chr14	61689976	-	0.934641	0.914758	0.907631	0.90899	0.91497	0.902386	0.879769	0.953385	0.96266	0.920094	0.872168	0.891813	0.889706	0.77907	0.823864	0.870739	0.863358	0.856494	0.831403	0.917298	0.915525	0.930754	0.900367	0.963971	0.960463	0.917145	0.941375	0.919445	0.919379	0.932725	0.928616	0.923278	0.898221	0.913297	1	1	0.998624	0.910183	0.93899	0.912281	0.938927	0.959251	0.90125	1	0.936912	0.925328
CpG_554	chr14	61689983	-	0.879776	0.851756	0.819277	0.866292	0.899272	0.900871	0.807425	0.868478	0.894737	0.842593	0.832	0.800785	0.765142	0.779762	0.76092	0.785509	0.789905	0.77019	0.778278	0.834195	0.834743	0.870888	0.834013	0.961821	0.858199	0.859701	0.892989	0.87156	0.88239	0.884462	0.85914	0.853868	0.840966	0.839991	1	1	0.762619	0.850016	0.858563	0.83539	0.92287	0.90264	0.832921	0.935076	0.921071	0.84811
CpG_555	chr14	61689996	-	0.858873	0.759566	0.85117	0.854364	0.881437	0.897992	0.841647	0.888708	0.862801	0.868284	0.868905	0.721343	0.752311	0.77907	0.706385	0.80746	0.792826	0.802341	0.791107	0.840932	0.832116	0.879431	0.837384	0.936397	0.860182	0.861717	0.888719	0.858688	0.865947	0.882682	0.856894	0.843226	0.854586	0.849	0	1	0.904372	0.879294	0.856093	0.851605	0.929679	0.912459	0.839803	0.932461	0.946518	0.85942
CpG_556	chr14	61689998	-	0.91597	0.873248	0.882587	0.838423	0.917316	0.907959	0.882591	0.907166	0.960571	0.940497	0.851882	0.886738	0.894963	0.77551	0.845848	0.890681	0.850871	0.857794	0.862235	0.898853	0.862545	0.907777	0.910544	0.965099	0.922338	0.914084	0.930471	0.917459	0.914217	0.935188	0.925349	0.890767	0.909897	0.894831	0	1	0.995209	0.908505	0.902052	0.900404	0.937703	0.902961	0.845774	0.953224	0.911714	0.881915
CpG_557	chr14	61690008	-	0.905625	0.840822	0.929423	0.801339	0.901198	0.921909	0.861127	0.906573	0.937035	0.919355	0.873802	0.781879	0.810546	0.77907	0.770023	0.869302	0.822446	0.797859	0.809904	0.879614	0.889342	0.900123	0.856532	0.984525	0.930652	0.91113	0.901166	0.917939	0.90739	0.907891	0.881078	0.88786	0.886195	0.871636	0	1	0.825189	0.908847	0.893496	0.867539	0.957406	0.905234	0.900371	0.92464	0.933915	0.888467
CpG_558	chr14	61690013	-	0.907322	0.843012	0.805985	0.825556	0.846386	0.859409	0.891908	0.86733	0.937035	0.844201	0.86229	0.872666	0.825839	0.77907	0.841477	0.829537	0.792169	0.828835	0.838123	0.900224	0.862783	0.917283	0.86513	0.963428	0.937622	0.877861	0.916334	0.904507	0.91636	0.926971	0.891504	0.902509	0.864694	0.89208	0	0.997059	0.901594	0.897849	0.90353	0.883797	0.948102	0.922421	0.849969	0.891249	0.933333	0.855548
CpG_559	chr14	61690022	-	0.926012	0.887827	0.864044	0.870339	0.92506	0.924119	0.865273	0.918757	0.934483	0.9	0.890675	0.837981	0.819077	0.77907	0.828588	0.861823	0.826058	0.851078	0.844579	0.878259	0.888218	0.903981	0.86611	0.995927	0.885346	0.900935	0.8996	0.902118	0.913442	0.949173	0.887927	0.908404	0.865866	0.872305	0	0.734513	0.993137	0.899747	0.897672	0.871657	0.932414	0.947934	0.883807	0.936811	0.944444	0.867503
CpG_560	chr14	61690036	-	0.948148	0.922392	0.869048	0.942286	0.935484	0.952432	0.918014	0.959957	0.952109	0.936709	0.896	0.93021	0.894219	0.77907	0.8625	0.948227	0.869565	0.92871	0.920969	0.925307	0.915698	0.936539	0.912571	0.991953	0.926728	0.920741	0.948491	0.951346	0.944282	0.952318	0.941609	0.953242	0.928834	0.911581	1	1	1	0.935191	0.92531	0.942368	0.964685	0.986354	0.953374	0.947943	0.955317	0.932756
CpG_561	chr14	61690046	-	0.938832	0.910256	0.90239	0.888641	0.928144	0.951351	0.855491	0.976087	0.910242	0.967742	0.848287	0.911877	0.849938	0.77907	0.833144	0.91453	0.882943	0.920863	0.908105	0.903545	0.911097	0.926225	0.858639	0.97586	0.922065	0.921326	0.968037	0.935352	0.944747	0.954443	0.930669	0.927686	0.90728	0.91128	1	1	1	0.919584	0.915581	0.914993	0.959142	0.927948	1	0.991604	0.959889	0.92255
CpG_562	chr14	61690052	-	0.974954	0.95974	0.97619	0.967849	0.973716	0.982721	0.975751	0.953413	0.953196	0.973502	0.877193	0.977055	0.949816	1	0.941043	0.975195	0.921791	0.976959	0.958387	0.945411	0.956692	0.945893	0.957334	1	0.959898	0.969652	0.981419	0.958217	0.968221	0.981492	0.947938	0.957441	0.96589	0.948598	1	1	0.933424	0.948379	0.94682	0.948258	0.981759	0.959821	0.927696	1	0.991013	0.959453
CpG_563	chr14	61690061	-	0.935333	0.919847	0.890656	0.936807	0.844683	0.92316	0.952656	0.922078	0.916762	0.945727	0.912281	0.957935	0.882641	0.77907	0.818594	0.904255	0.869652	0.923575	0.911934	0.933879	0.922853	0.964103	0.923418	0.999268	0.938555	0.961747	0.945205	0.954014	0.943066	0.952766	0.955768	0.918278	0.920471	0.921656	0	1	0.873813	0.929555	0.923815	0.933316	0.963246	0.929078	0.882353	0.928631	0.944022	0.933288
CpG_564	chr14	65759478	+	0.487453	0.581276	0.591002	0.462264	0.603811	0.519067	0.609587	0.473063	0.634648	0.527331	0.639393	0.494006	0.60217	0.410959	0.660319	0.498294	0.626499	0.535543	0.622985	0.618344	0.619624	0.60578	0.605261	0.717116	0.63942	0.504226	0.481434	0.485965	0.44926	0.461776	0.508532	0.596525	0.612905	0.579696	0	0.381643	0.51949	0.624811	0.601113	0.637858	0.597778	0.64215	0.701705	0.571116	0.597181	0.493723
CpG_565	chr14	65759535	+	0.297979	0.51532	0.55587	0.304421	0.519969	0.340324	0.525766	0.319139	0.575208	0.353814	0.558384	0.408908	0.545526	0.5	0.604614	0.369846	0.570557	0.384196	0.567173	0.492435	0.504772	0.509264	0.494473	0.605042	0.54347	0.333868	0.290671	0.28565	0.271463	0.284959	0.285197	0.495124	0.49852	0.463612	0	0.139073	0.411585	0.480483	0.491469	0.515021	0.537284	0.518435	0.484716	0.357071	0.374852	0.303213
CpG_566	chr14	65759556	+	0.473622	0.65866	0.681033	0.481725	0.667274	0.504282	0.658428	0.470032	0.674708	0.5381	0.687366	0.532083	0.674015	0.640845	0.707945	0.509681	0.668834	0.566772	0.689221	0.636779	0.635994	0.654981	0.618212	0.733333	0.677392	0.502223	0.455243	0.451466	0.42101	0.453959	0.46832	0.637002	0.64228	0.629502	0	0.345178	0.629713	0.655651	0.669916	0.6858	0.683853	0.662346	0.531722	0.489607	0.532381	0.521907
CpG_567	chr14	67072764	-	0.0949588	0.171009	0.159318	0.114144	0.170463	0.1167	0.18632	0.12266	0.172234	0.120452	0.189752	0.143347	0.171007	0.158845	0.159023	0.104436	0.17248	0.125892	0.168452	0.180021	0.17155	0.175278	0.171869	0.215137	0.168813	0.13466	0.125299	0.13234	0.140152	0.129622	0.129985	0.164755	0.185907	0.168648	0.0595611	0.149583	0.111446	0.149985	0.143037	0.153097	0.151241	0.159414	0.180438	0.126775	0.0944267	0.119036
CpG_568	chr14	67072811	-	0.148472	0.175682	0.161493	0.138102	0.189854	0.127031	0.178343	0.142354	0.175059	0.136927	0.183744	0.136001	0.181502	0.107531	0.161729	0.113828	0.152518	0.155995	0.189591	0.20044	0.164956	0.183818	0.174219	0.176251	0.18247	0.140657	0.133462	0.142447	0.155883	0.144346	0.155156	0.1809	0.194808	0.158966	0	0.13932	0.134497	0.147617	0.137727	0.158585	0.154952	0.19578	0.176448	0.132041	0.126232	0.134872
CpG_569	chr14	70079166	-	0.05145	0.0380875	0.073724	0.0344054	0.0599747	0.0362694	0.0163286	0.0478755	0.0763395	0.0422117	0.0742686	0.0325953	0.0715116	NA	0.0502577	0.0171215	0.0803754	0.0413105	0.0672867	0.134372	0.0935094	0.0723982	0.0772082	0	0.478261	0.105477	0.112867	0.0391061	0.0764526	0.0414747	0.0866373	0.108584	0.0880989	0.145833	NA	NA	0	0.0444915	0.0713224	0.0817942	0.22973	0	0	0	0	0.128722
CpG_570	chr14	70079169	-	0.0311194	0.0637255	0.0951481	0.0471557	0.0714734	0.0700086	0.0343811	0.0551559	0.0944919	0.0395981	0.117691	0.0594727	0.0941313	NA	0.0758355	0.0425985	0.0760518	0.0707881	0.0857455	0.13773	0.188119	0.111111	0.109462	0	0.403226	0.0798787	0.0859729	0.0445269	0.116314	0.0665138	0.0550661	0.114075	0.112828	0.178703	NA	NA	0	0.0547368	0.0792006	0.107584	0.423729	0.0814815	0	0	0	0.0633681
CpG_571	chr14	70079191	-	0.0399257	0.0479675	0.110761	0.0232036	0.056391	0.0517241	0.0737259	0.0647482	0.0791844	0.0535077	0.104833	0.0416412	0.0945158	NA	0.0609756	0.0436867	0.0839076	0.028463	0.0574398	0.148833	0.102536	0.0498866	0.0996904	0	0.548387	0.107287	0.100686	0.0586592	0.0990099	0.0645161	0.0799707	0.103624	0.120248	0.163614	NA	NA	0	0.0970464	0.127502	0.0856134	0.316498	0.0820896	0	0	0	0.08
CpG_572	chr14	70079194	-	0.0103141	0.0504065	0.073817	0.00981132	0.0393651	0.032872	0.042836	0.0480192	0.0655271	0.0367953	0.0583396	0.0232416	0.0796253	NA	0.0474968	0.0172136	0.0818404	0.0184397	0.0728767	0.133268	0.105263	0	0.0778739	0	0.486486	0.0528455	0.0316742	0.0195349	0.0669711	0.0275229	0.0647535	0.0893665	0.0804954	0.112469	NA	NA	0	0.0419287	0.108808	0.0953222	0.388514	0	0	0	0	0.109457
CpG_573	chr14	70079205	-	0.0211203	0.0570108	0.0966387	0.0224313	0.080869	0.0456053	0.0442607	0.0425281	0.0514905	0.0275072	0.0853047	0.0284192	0.0808989	NA	0.0442643	0.0304438	0.0520254	0.0187901	0.038441	0.0945034	0.0963597	0.0642202	0.0863747	0	0.394595	0.069001	0.0221729	0.0382514	0.0754858	0.0619469	0.0584879	0.0650589	0.0890782	0.113939	NA	NA	0	0.0354167	0.109729	0.033101	0.389831	0	0	0	0	0.0855932
CpG_574	chr14	70079212	-	0.0120874	0.029304	0.0533628	0.0172478	0.0357031	0.0285344	0.0215293	0.03823	0.0401998	0.0109792	0.0520404	0.00673607	0.0467208	NA	0.0208735	0.0462196	0.0410765	0.019816	0.0361545	0.0828057	0.0187122	0.0273349	0.0507583	0	0.277174	0.0320774	0.0499432	0.021891	0.00948047	0	0.0217552	0.0318182	0.0423795	0.0413016	NA	NA	0	0.00105485	0.0607407	0.0313051	0.215852	0	0	0	0	0.0525164
CpG_575	chr14	70079224	-	0.0435593	0.051964	0.12199	0.0313444	0.116449	0.0361971	0.0772077	0.0557565	0.0804488	0.0621854	0.106271	0.0495537	0.0968686	NA	0.075782	0.0593979	0.114129	0.0481043	0.08809	0.118919	0.122266	0.116705	0.119455	0	0.487671	0.0940695	0.0679724	0.0287329	0.0828856	0.072093	0.0619866	0.0906483	0.117439	0.155652	NA	NA	0	0.0661686	0.120883	0.12355	0.386325	0.0828625	0	0	0	0.109697
CpG_576	chr14	70079248	-	0.0992579	0.133009	0.177582	0.0688108	0.17166	0.0901995	0.141359	0.105452	0.176945	0.0830878	0.168657	0.0984108	0.135495	NA	0.186061	0.0792975	0.148463	0.0975035	0.174317	0.219748	0.245829	0.185102	0.185185	0.794643	0.548387	0.180808	0.162896	0.104824	0.128765	0.0321101	0.112821	0.20294	0.194423	0.14652	NA	NA	0.54955	0.194969	0.191882	0.158451	0.501684	0.233333	0	0	0	0.189939
CpG_577	chr14	70079274	-	0.0727189	0.0948136	0.158128	0.0635277	0.132075	0.0758621	0.0618253	0.0645547	0.132639	0.0694935	0.122494	0.0791411	0.116387	NA	0.140655	0.0441255	0.139225	0.0716643	0.123228	0.167311	0.166484	0.139955	0.0986436	0	0.489247	0.117053	0.189616	0.0444444	0.121896	0.0825688	0.0776557	0.110482	0.182239	0.126829	NA	NA	0	0.1174	0.191426	0.0869947	0.195286	0.133333	0	0	0	0.0989583
CpG_578	chr14	70079283	-	0.100649	0.145057	0.201262	0.0487433	0.165091	0.114088	0.132085	0.0993377	0.183025	0.0736594	0.187361	0.121027	0.162993	NA	0.215887	0.0651361	0.212318	0.103269	0.175794	0.229268	0.183315	0.218962	0.190683	0	0.551351	0.165657	0.201357	0.117536	0.156863	0.166282	0.126007	0.20057	0.227808	0.291819	NA	NA	0	0.207983	0.213967	0.192171	0.429054	0.174074	0	0	0.942308	0.172959
CpG_579	chr14	74978493	+	0.909266	0.875	0.887189	0.911833	0.949206	0.951456	0.935	0.954436	0.919771	0.984615	0.924699	0.922566	0.966581	0.608392	0.921296	0.813187	0.942529	0.901515	0.90998	0.9255	0.928152	0.952726	0.933613	0.990332	0.913591	0.922705	0.925657	0.922599	0.920236	0.916461	0.923871	0.917048	0.919708	0.886406	1	1	0.924214	0.921495	0.88172	0.938282	0.911638	0.848143	1	0.846409	0.919708	0.934434
CpG_580	chr14	74978556	+	0.977273	1	0.990521	0.995376	1	0.988691	0.963659	0.958573	0.971711	0.935185	0.953079	0.958963	0.988998	1	0.997696	0.935897	0.937799	0.9525	0.970048	0.964631	0.976942	0.970717	0.933752	0.977764	0.969498	0.963393	0.964279	0.953702	0.954596	0.945879	0.958884	0.956745	0.974711	0.967427	1	1	0.960912	0.976904	0.961958	0.962781	0.969171	0.976721	0.998168	0.913189	0.946169	0.928051
CpG_581	chr14	74978575	+	0.952562	0.969582	1	0.965517	0.974441	0.996732	0.9599	1	0.997167	0.996914	0.958702	0.995699	0.965854	1	0.983721	0.989744	0.954286	0.997506	0.988417	0.968599	0.964683	0.979475	0.967855	0.967293	0.961296	0.984902	0.973006	0.990284	0.981257	0.975798	0.974544	0.973214	0.976854	0.980966	1	1	1	0.963705	0.99217	0.98081	0.98145	0.950502	1	1	0.999035	0.966635
CpG_582	chr14	99099889	-	0.00447094	0.0259481	0	0	0	0.002457	0.00909091	0	0	0	0.00233645	0	0.00745156	0	0.00202429	0	0.00650054	0	0.0115546	0.00243112	0	0	0.00622339	0	0	0.00935629	0	0.00199033	0.000279018	0	0.00390625	0	0.001983	0.00188893	NA	NA	0	0.00417014	0.00535077	0.00336795	0	0.00257732	NA	0	0	0.0008
CpG_583	chr14	99099895	-	0	0	0	0.00186567	0	0	0.0014881	0.00914077	0	0	0.00689655	0.00829876	0	0	0	0.00203459	0.00845666	0	0	0.00479233	0.00421667	0.000527148	0.00258565	0	0	0.00745156	0.00254291	0.00282725	0.00249377	0.00972364	0.00518538	0.00168776	0.00788288	0.00413689	NA	NA	0	0.0033195	0.00446163	0.00390843	0	0	NA	0	0	0.00370959
CpG_584	chr14	99099906	-	0	0.0118407	0.0045489	0	0.00164204	0	0.000797448	0.00590551	0.00085034	0	0.0192308	0.0171429	0	0	0	0.0156842	0.00570451	0.0062978	0.000548847	0.00125804	0.00205269	0.00498201	0.00257025	0	0.0246753	0.00119142	0.00100773	0	0.00234811	0	0	0.00327284	0.0073014	0.00528686	NA	NA	0	0	0.000311915	0	0.000774593	0	NA	0	0	0.00235327
CpG_585	chr14	99099932	-	0.000747943	0.00601202	0.00804094	0.00655431	0.00157109	0	0.0393641	0.00551471	0.00243309	0.00196271	0.00234742	0.00623269	0.0112275	0	0.00900901	0.0103788	0.00541712	0.00219974	0.0110643	0.0025641	0.00376555	0	0.00329381	0.00121951	0.000628536	0.000562746	0.00544348	0.00227888	0	0.000256279	0.00247557	0.00457993	0.0136267	0.00980947	NA	NA	0	0.00020734	0.00967694	0.00252809	0	0	NA	0	0.00250627	0.00200749
CpG_586	chr14	99099949	-	0	0.001001	0.00146628	0	0.00469851	0	0	0	0	0.00196657	0.00118203	0	0	0	0.000999001	0	0.000541712	0.00129926	0	0.00134789	0	0.0042328	0.0101923	0.00121951	0	0.00524738	0.00606835	0.00185714	0.00405254	0.000256608	0.00404225	0.000428204	0	0.000188715	NA	NA	0	0.00663487	0.000299356	0.0093102	0.00148148	0	NA	0	0	0.00268601
CpG_587	chr14	99099966	-	0	0	0.0058309	0	0.00778816	0.00243309	0	0	0	0.00589391	0.00932401	0	0.023845	0	0.00992063	0.00309917	0.00759219	0.0121003	0.00210305	0.00481155	0.00645995	0.00420389	0.00325733	0	0	0	0.00952381	0.000563857	0.00498063	0.00203666	0.00594776	0.00426136	0.00533109	0.000747943	NA	NA	0	0.00205931	0.00918519	0.00139237	0	0	NA	0	0	0.00398936
CpG_588	chr14	99099969	-	0.00447761	0	0.00145773	0	0	0.00246305	0.0347432	0.0018315	0.00805153	0	0.00699301	0	0	0	0	0.00414508	0.00759219	0.000865052	0	0.00295064	0.00129199	0.00946372	0.00426789	0	0.01875	0.00409836	0	0.00423251	0.00443336	0.00254582	0.00621923	0.00876697	0.000563539	0.00187196	NA	NA	0	0.0070161	0.00503704	0.00529986	0.0368189	0	NA	0	0	0.00133227
CpG_589	chr15	3996517	-	0.00779037	0.00870511	0	0.00417101	0.0011655	0.0206573	0	0.00462107	0.0302744	0.0128041	0.0136986	0.000995025	0.019337	0	0.00863931	0.00095057	0.000536769	0.011432	0.0109329	0.0120145	0.0129929	0.0124295	0.00890699	0.00260651	0.00755806	0.00899937	0.00484185	0.00642734	0.00847131	0.00886608	0.0093983	0.0101297	0.0129829	0.0118044	0	0	0.000165865	0.0187678	0.00474031	0.00849156	0.00604827	0.00705729	0.0258047	0.00148832	0.00426712	0.014141
CpG_590	chr15	3996552	-	0.0178446	0.0878233	0.035308	0.024974	0.061011	0.0666041	0.0786268	0.0254159	0.0416864	0.0862397	0.0458204	0.0425111	0.0732817	0.0343392	0.0350593	0.0357313	0.0440669	0.0360252	0.0733117	0.0563183	0.0497614	0.0637054	0.0639272	0.0331666	0.0431546	0.0410428	0.0423601	0.0378054	0.0430231	0.0275807	0.0375498	0.0689562	0.0443881	0.0407266	0	0	0.0621206	0.0564799	0.0502593	0.0492083	0.0592044	0.0345935	0.0561371	0.0433453	0.0716234	0.0610731
CpG_591	chr15	3996565	-	0.0256705	0.0308057	0.0442282	0.0228441	0.0575816	0.0284827	0.0540705	0.0136778	0.0549626	0.036729	0.0218729	0.00923411	0.0515362	0.0484507	0.0380368	0.00994036	0.0327441	0.0224026	0.024181	0.0484282	0.0404542	0.0604887	0.0618532	0.0831936	0.0445919	0.0402771	0.0475915	0.0421905	0.04011	0.0499769	0.0425272	0.0422835	0.04157	0.0364543	0	0.000672043	0.0656338	0.0532606	0.0473973	0.0433312	0.0594672	0.0374162	0.0201442	0.0344237	0.041432	0.0410917
CpG_592	chr15	26309559	-	0	0	0	0	0	0	0	0	NA	0	0	0	0	NA	0	0	0	0	0	0	0	0	0	NA	0	0	0	0	0	0	0	0	0	0	NA	NA	NA	0	0	0	0	NA	NA	NA	NA	0
CpG_593	chr15	26309582	-	0	0	0	0	0	0	0	0	0	0.0769231	0	0	0	NA	0	0	0	0	0.025641	0.0165289	0	0	0	NA	0	0	0	0	0	0	0.0526316	0	0	0	NA	NA	NA	0	0	0	0	NA	NA	NA	NA	0
CpG_594	chr15	26309590	-	0	0	0	0	0	0.1875	0	0	0	0	0	0	0	NA	0	0	0	0	0	0	0	0	0	NA	0	0	0	0	0	0	0	0	0	0	NA	NA	NA	0	0	0.00255754	0	NA	NA	NA	NA	0
CpG_595	chr15	26309593	-	0	0	0	0	0	0	0	0	0	0	0.0119048	0	0	NA	0	0	0	0	0	0	0.00990099	0	0	NA	0	0.024	0	0	0.0173913	0	0	0	0	0	NA	NA	NA	0	0.00904977	0.016	0	NA	NA	NA	NA	0
CpG_596	chr15	26309608	-	0	0	0.04	0	0	0	0	0	0	0	0	0	0	NA	0	0	0	0	0	0.00414938	0	0	0	NA	0	0	0	0	0	0	0	0	0.00338983	0.043956	NA	NA	NA	0	0.0213675	0	0	NA	NA	NA	NA	0
CpG_597	chr15	26309618	-	0	0.0294118	0	0	0	0	0	0	0	0	0	0	0	NA	0	0	0	0	0	0.0541667	0	0	0	NA	0	0	0	0.0150943	0	0.25	0	0	0	0	NA	NA	NA	0	0.0213675	0	0	NA	NA	NA	NA	0.0237154
CpG_598	chr15	26309624	-	0	0	0	0	0	0.1875	0	0	0	0	0.0116279	0.0916031	0	NA	0	0	0	0	0.0779221	0	0	0	0.00784314	NA	0	0.00732601	0	0	0	0	0	0.0366972	0	0	NA	NA	NA	0	0	0.0208877	0	NA	NA	NA	NA	0
CpG_599	chr15	26309627	-	0	0	0	0	0	0.15625	0.03125	0	0	0	0	0	0	NA	0	0	0.104478	0	0	0	0	0	0	NA	0	0	0	0	0.011811	0	0.00458716	0.0306748	0	0	NA	NA	NA	0.0102041	0.0221239	0	0	NA	NA	NA	NA	0
CpG_600	chr15	26309629	-	0	0.0294118	0.039604	0	0	0.1875	0	0	0	0	0	0	0	NA	0	0	0	0	0	0	0	0	0	NA	0	0	0	0	0	0	0.0177778	0	0	0	NA	NA	NA	0	0	0	0	NA	NA	NA	NA	0.0233463
CpG_601	chr15	26309634	-	0	0	0	0	0	0.16129	0	0	0	0	0	0	0	NA	0	0	0	0	0	0	0	0	0	NA	0	0	0	0	0.0507812	0	0	0	0.0204778	0	NA	NA	NA	0	0	0.0078534	0	NA	NA	NA	NA	0
CpG_602	chr15	26309642	-	0	0	0	0.0322581	0	0	0	0	NA	0	0.0930233	0	0	NA	0	0	0	0	0	0.0165289	0.0720721	0	0	NA	0	0.00729927	0	0.0225564	0.0610687	0	0	0.0419162	0	0.0217391	NA	NA	NA	0	0.017094	0	0	NA	NA	NA	NA	0
CpG_603	chr15	26309646	-	0	0.0294118	0.0392157	0	0	0.25	0.125	0.0566038	NA	0.0769231	0.0697674	0	0	NA	0.1	0.0333333	0.0285714	0	0	0.0165289	0.00900901	0	0.0387597	NA	0	0.0364964	0	0.037594	0	0	0	0.0958084	0	0	NA	NA	NA	0.00990099	0.025641	0	0	NA	NA	NA	NA	0.115385
CpG_604	chr15	26309649	-	0	0	0	0	0	0.0625	0	0.0188679	NA	0.0769231	0	0	0	NA	0	0.0333333	0	0	0	0	0.018018	0	0.00775194	NA	0	0	0	0.0151515	0.0229008	0	0	0	0	0.0108696	NA	NA	NA	0	0	0	0	NA	NA	NA	NA	0.0846154
CpG_605	chr15	60822414	-	0.0955307	0.183729	0.150237	0.162232	0.171527	0.176554	0.182334	0.139037	0.167931	0.12875	0.212159	0.126582	0.192047	0.158371	0.071708	0.113821	0.116977	0.102723	0.12766	0.124513	0.164614	0.170158	0.15835	0.171966	0.176023	0.136476	0.137816	0.118969	0.137672	0.125641	0.123359	0.137216	0.12337	0.140589	NA	0.340426	0.0835635	0.151616	0.140044	0.140474	0.131562	0.249325	0.108414	0.27935	0.209778	0.141672
CpG_606	chr15	60822470	-	0.150058	0.280095	0.230655	0.283902	0.309228	0.239897	0.338327	0.193231	0.256647	0.161479	0.292807	0.182867	0.270393	0.362791	0.216127	0.180225	0.245195	0.229764	0.236581	0.225562	0.256679	0.271124	0.2515	0.247078	0.300833	0.207822	0.191669	0.165515	0.201121	0.192067	0.171976	0.216357	0.21781	0.225341	NA	0.341727	0.184071	0.255242	0.231343	0.234183	0.248013	0.440905	0.335821	0.39787	0.287757	0.209346
CpG_607	chr15	60822505	-	0.0530175	0.093578	0.0818966	0.0902896	0.130809	0.0688432	0.0727567	0.0702703	0.0994536	0.0701754	0.102372	0.0513023	0.0877193	0.201835	0.0817121	0.0795734	0.0798548	0.0607564	0.070035	0.070986	0.0981691	0.0971896	0.0912809	0.0370857	0.0930333	0.0713971	0.064278	0.0613555	0.0661203	0.0562016	0.0547815	0.0685782	0.0730028	0.0756279	NA	0.340426	0.108877	0.100898	0.0835301	0.0831495	0.0859574	0.144081	0.139837	0.0845499	0.0828853	0.0734214
CpG_608	chr15	60822510	-	0.124009	0.148661	0.16763	0.18863	0.193659	0.168822	0.183065	0.136785	0.18202	0.143949	0.2125	0.117694	0.211973	0.352941	0.198187	0.121891	0.171742	0.137243	0.169021	0.170391	0.192201	0.211623	0.188701	0.190225	0.191653	0.148722	0.146907	0.120202	0.143574	0.136683	0.13086	0.171375	0.158585	0.176262	NA	0	0.0415493	0.190823	0.168445	0.171208	0.199914	0.326531	0.0693069	0.241975	0.210742	0.140838
CpG_609	chr15	60822531	-	0.128205	0.255708	0.227014	0.24322	0.280851	0.208714	0.257347	0.173516	0.245614	0.185786	0.282716	0.167585	0.285714	0.418919	0.238882	0.183293	0.260766	0.169834	0.216056	0.221035	0.2583	0.25575	0.239481	0.222222	0.286165	0.193064	0.189953	0.15262	0.183437	0.19295	0.171012	0.211146	0.207391	0.241931	NA	0.340426	0.192521	0.24756	0.228865	0.230119	0.228995	0.300813	0.298217	0.373035	0.297768	0.202282
CpG_610	chr15	74751284	+	0.386605	0.60915	0.672205	0.393725	0.542708	0.452774	0.664247	0.400605	0.683758	0.50889	0.71599	0.513271	0.650192	0.445104	0.70541	0.471535	0.67225	0.498842	0.640458	0.64508	0.700859	0.717723	0.715865	0.638495	0.711335	0.51515	0.492954	0.427792	0.450824	0.448261	0.447935	0.643206	0.708885	0.674119	NA	0.156489	0.545821	0.675831	0.70476	0.689853	0.731073	0.552342	0.69281	0.657707	0.570485	0.472697
CpG_611	chr15	74751304	+	0.230023	0.330127	0.35035	0.219218	0.261013	0.247994	0.358017	0.228149	0.316052	0.226033	0.350797	0.23951	0.344404	0.278689	0.355734	0.205457	0.291632	0.229422	0.299891	0.333264	0.345244	0.376202	0.367717	0.265039	0.40301	0.257073	0.217657	0.206177	0.214304	0.210778	0.202774	0.324455	0.341147	0.341552	NA	0.158513	0.256916	0.2932	0.339312	0.33802	0.340468	0.264937	0.289125	0.279648	0.203246	0.217497
CpG_612	chr15	74751361	+	0.4921	0.591302	0.650949	0.441488	0.549455	0.493319	0.626195	0.470846	0.645665	0.535187	0.645483	0.540127	0.648956	0.522255	0.698721	0.519236	0.632624	0.525015	0.614033	0.631441	0.686176	0.712147	0.68129	0.579176	0.703812	0.54411	0.531239	0.461235	0.499902	0.51137	0.483121	0.636563	0.669622	0.639113	NA	0.748092	0.692424	0.62072	0.650596	0.664234	0.714121	0.670998	0.624346	0.565474	0.498051	0.514325
CpG_613	chr15	74751367	+	0.357345	0.446658	0.472494	0.330558	0.383239	0.371441	0.469447	0.355499	0.47409	0.394262	0.486726	0.434621	0.476942	0.331343	0.49917	0.377558	0.448667	0.38486	0.461908	0.451887	0.501859	0.546979	0.502461	0.435761	0.497219	0.401962	0.382326	0.325478	0.365056	0.359349	0.356613	0.47026	0.480969	0.469841	NA	0.539062	0.473146	0.442507	0.466618	0.49266	0.567097	0.465642	0.388889	0.485714	0.404472	0.382431
CpG_614	chr15	78888954	-	0.805187	0.893407	0.809969	0.795207	0.835024	0.771825	0.862758	0.756928	0.856936	0.86343	0.84192	0.780309	0.885865	NA	0.901224	0.84535	0.879637	0.794173	0.84456	0.830104	0.822072	0.743333	0.791096	0.95	0.825397	0.763285	0.755952	0.713115	0.800539	0.923729	0.858025	0.862626	0.842262	0.832536	NA	NA	NA	0.761658	0.912854	0.881356	1	NA	NA	NA	NA	0.911168
CpG_615	chr15	78888963	-	0.882779	0.929125	0.902973	0.908425	0.916383	0.893894	0.944301	0.910256	0.891479	0.913242	0.963615	0.931034	0.947834	NA	0.919469	0.871608	0.942661	0.926346	0.897382	0.922504	0.903153	0.932886	0.945017	1	0.992188	0.872289	0.97619	0.848361	0.938005	1	0.96319	0.965795	0.93787	0.918269	NA	NA	NA	0.963731	0.919492	0.87931	1	NA	NA	NA	NA	0.946701
CpG_616	chr15	78888987	-	0.842457	0.859031	0.860374	0.807159	0.898649	0.88745	0.885087	0.765974	0.828488	0.849738	0.888889	0.854575	0.860035	NA	0.843723	0.889468	0.883068	0.899057	0.936524	0.852018	0.931818	0.983389	0.915899	1	0.850394	0.83455	0.853293	0.794239	0.805405	0.677966	0.825462	0.880081	0.870871	0.9375	NA	NA	NA	0.984293	0.95966	0.906516	1	NA	NA	NA	NA	0.84264
CpG_617	chr15	78889065	-	0.846755	0.83023	0.920155	0.836469	0.896366	0.868317	0.839435	0.834127	0.875902	0.825356	0.871795	0.794498	0.875223	NA	0.88559	0.854922	0.924242	0.882022	0.908997	0.885463	0.816555	0.891089	0.887755	1	0.804688	0.825776	0.827893	0.837398	0.807487	0.876033	0.873984	0.89	0.815249	0.92381	NA	NA	NA	0.92268	0.892178	0.870787	1	NA	NA	NA	NA	0.835
CpG_618	chr15	78889070	-	0.895244	0.932092	0.904503	0.884615	0.945615	0.942631	0.956326	0.92399	0.923581	0.967638	0.963827	0.910642	0.938217	NA	0.904302	0.940871	0.924528	0.916353	0.902821	0.920705	0.979866	0.986441	0.934407	1	1	0.899038	0.940828	0.943089	0.919786	1	0.924644	0.952	0.938416	0.92823	NA	NA	NA	0.958763	0.949686	0.924157	1	NA	NA	NA	NA	0.955
CpG_619	chr15	78889082	-	0.840772	0.865427	0.832558	0.782357	0.875505	0.879327	0.828516	0.9	0.883117	0.881553	0.836085	0.90534	0.853464	NA	0.893636	0.889119	0.867223	0.853933	0.872802	0.810573	0.876957	0.933775	0.862227	1	0.664062	0.735084	0.784024	0.930894	0.887701	1	0.841463	0.945122	0.844575	0.919048	NA	NA	NA	0.907216	0.924528	0.865169	1	NA	NA	NA	NA	0.8475
CpG_620	chr15	83527319	-	0.0512422	0.168595	0.180662	0.165441	0.172152	0.13948	0.293559	0.0752048	0.103219	0.123422	0.214286	0.137656	0.168317	NA	0.2125	0.205433	0.206567	0.181745	0.212448	0.173597	0.240468	0.173456	0.180752	0.478261	0.209353	0.188561	0.151794	0.131283	0.126422	0.174548	0.125313	0.194576	0.229469	0.181287	NA	NA	0	0.1785	0.178253	0.213461	0.253178	0.248588	0	0.347107	0	0.156162
CpG_621	chr15	83527324	-	0.0321317	0.0874587	0.0899067	0.0832298	0.0718789	0.0637544	0.0969442	0.0416357	0.0831486	0.0421941	0.0972887	0.032992	0.117284	NA	0.0724234	0.0872881	0.0962696	0.0870968	0.0813953	0.087007	0.119269	0.0772465	0.0910539	0.391975	0.0883621	0.0992344	0.0982184	0.0720985	0.0397476	0.0827804	0.060508	0.0709131	0.0888626	0.134615	NA	NA	0	0.101898	0.111147	0.0887942	0.139241	0.124646	0	0.105978	0	0.0623824
CpG_622	chr15	83527333	-	0.076378	0.311881	0.281834	0.1772	0.227157	0.0912322	0.305174	0.167414	0.234498	0.242637	0.238019	0.189095	0.245353	NA	0.285714	0.216102	0.207536	0.225284	0.288833	0.28447	0.267288	0.240147	0.244214	0.256173	0.331868	0.24314	0.18032	0.182624	0.168819	0.238216	0.167045	0.218691	0.232428	0.294891	NA	NA	0	0.288644	0.254765	0.252542	0.391763	0.256338	0	0.564033	0	0.1602
CpG_623	chr15	83527335	-	0.0686427	0.0727273	0.0828402	0.0892421	0.0479193	0.0743802	0.105263	0.0447761	0.078714	0.0813464	0.107937	0.0839955	0.102596	NA	0.16205	0.110169	0.0800722	0.082391	0.118672	0.0975469	0.132115	0.0706436	0.098749	0	0.144086	0.108619	0.0755495	0.0863797	0.0577287	0.126752	0.0621257	0.101823	0.125519	0.1059	NA	NA	0	0.136	0.0997442	0.131207	0.208641	0.341808	0	0.00271739	0	0.078125
CpG_624	chr15	83527360	-	0.0720372	0.0909091	0.117997	0.109181	0.0451031	0.0508274	0.134737	0.0349442	0.0720621	0.0728291	0.0988836	0.0558723	0.0721519	NA	0.152566	0.0770533	0.0973716	0.095315	0.0771144	0.106988	0.141746	0.126275	0.0943497	0	0.102804	0.134021	0.0621572	0.0818182	0.0842803	0.114899	0.0891656	0.120289	0.126956	0.100944	NA	NA	0	0.121756	0.126787	0.115648	0.127503	0.135593	0	0	0	0.120075
CpG_625	chr15	83527376	-	0.237485	0.484323	0.500641	0.304401	0.40722	0.348727	0.397895	0.249907	0.402886	0.273751	0.495215	0.370011	0.409653	0	0.320139	0.438031	0.407043	0.34101	0.372508	0.409229	0.426769	0.443407	0.408	0.395313	0.474387	0.393818	0.352361	0.328721	0.356353	0.342155	0.320481	0.400095	0.424863	0.458311	NA	NA	1	0.436013	0.434484	0.440026	0.664731	0.546742	0.986486	0.516484	0.384824	0.372865
CpG_626	chr15	83527398	-	0.0208178	0.0512	0.066778	0.0491228	0.037037	0.0415704	0.0620476	0.014771	0.0481928	0.0275862	0.0207668	0.059417	0.0324074	NA	0.0351351	0.0661157	0.0762565	0.0508475	0.0573043	0.0520509	0.0446961	0.069912	0.068164	0.00308642	0.0547945	0.0662213	0.0958333	0.0302245	0.0581323	0.0566563	0.0572687	0.0387717	0.0536278	0.0549491	NA	NA	0	0.0585027	0.0524321	0.0668166	0.0810526	0	0	0.107438	0.313514	0.0517611
CpG_627	chr15	83527414	-	0.041181	0.16804	0.0845309	0.125763	0.120558	0.158205	0.124341	0.0813433	0.145072	0.0666667	0.133333	0.169318	0.13597	NA	0.19774	0.200847	0.161194	0.155285	0.135408	0.104671	0.120431	0.128057	0.0949216	0.222222	0.160804	0.112293	0.119526	0.104706	0.0913401	0.126024	0.117077	0.094162	0.149704	0.150779	NA	NA	0	0.113602	0.140908	0.097322	0.119874	0	0	0.105978	0.172973	0.118405
CpG_628	chr15	83527442	-	0.246885	0.381032	0.483898	0.364749	0.464061	0.307329	0.48156	0.303396	0.390919	0.369784	0.448882	0.467667	0.387654	NA	0.612188	0.451312	0.374925	0.404839	0.449202	0.424365	0.478326	0.486267	0.432296	0.79321	0.489957	0.375258	0.368905	0.367634	0.423053	0.379767	0.40713	0.45143	0.438368	0.498731	NA	NA	0.982759	0.445717	0.404633	0.480222	0.527865	0.68169	1	0.796196	0.518919	0.446211
CpG_629	chr15	83846851	-	0.27599	0.233876	0.214677	0.289474	0.188159	0.288573	0.210552	0.282348	0.210243	0.286051	0.229251	0.266043	0.197637	0.35781	0.205568	0.324466	0.197992	0.305332	0.249162	0.199866	0.213918	0.244515	0.197285	0.252089	0.254983	0.235554	0.29372	0.268087	0.263919	0.31272	0.262451	0.227972	0.227835	0.231296	0.358396	0.3379	0.337066	0.242422	0.197169	0.212133	0.251658	0.307066	0.282768	0.366262	0.324261	0.309303
CpG_630	chr15	83846891	-	0.688792	0.48017	0.539605	0.698561	0.500502	0.615385	0.458076	0.634048	0.484739	0.630137	0.563397	0.633632	0.515811	0.743658	0.485548	0.682757	0.467349	0.573027	0.537099	0.529433	0.536265	0.603368	0.538327	0.650972	0.685256	0.611418	0.688201	0.648929	0.615492	0.676192	0.63468	0.54048	0.550273	0.555982	0.744304	0.698709	0.697707	0.564819	0.482161	0.50949	0.604241	0.645952	0.609011	0.746429	0.726882	0.6569
CpG_631	chr15	83846894	-	0.607988	0.440534	0.488514	0.6322	0.4395	0.595582	0.422859	0.590585	0.425618	0.551439	0.470108	0.590098	0.441036	0.674202	0.384366	0.611578	0.40545	0.531579	0.484066	0.478918	0.475589	0.549213	0.475705	0.593061	0.627437	0.551757	0.616749	0.583041	0.55642	0.620116	0.563702	0.500344	0.48853	0.48699	0.62375	0.647706	0.635512	0.505012	0.446216	0.461327	0.569447	0.601578	0.594108	0.714335	0.663422	0.60576
CpG_632	chr15	83846929	-	0.746804	0.529142	0.584421	0.763158	0.543728	0.709984	0.522682	0.723877	0.533753	0.681241	0.662602	0.700807	0.532089	0.847278	0.509049	0.727747	0.536272	0.660155	0.57937	0.569537	0.576988	0.628086	0.570022	0.674503	0.682185	0.705262	0.742412	0.710685	0.679392	0.76778	0.692818	0.562325	0.61863	0.613841	0.7825	0.77646	0.777222	0.608212	0.548159	0.571154	0.642412	0.66857	0.702207	0.80138	0.765708	0.717136
CpG_633	chr15	84756607	+	0.00325733	0.0116959	0.0691824	0.00609756	0.0179641	0	0.101215	0.0276498	0.101695	0.0956938	0.0191083	0.0867052	0.0274725	NA	0.0571429	0.0181818	0.0269461	0.0457516	0.0340426	0.0592334	0.0335366	0.093617	0.0458716	NA	0	0.0477612	0	0.0209424	0.0594901	0	0.0281195	0.0489237	0.0245399	0.044586	NA	NA	NA	0.0811808	0.0480769	0.0653595	0	0	0	0	NA	0.0342298
CpG_634	chr15	84756643	+	0.0358891	0.0442478	0.019544	0.0152905	0.0297619	0.145299	0.0816327	0.0277778	0.0509915	0.0821256	0.0126984	0.0411765	0	NA	0.0331754	0.0185185	0.0197269	0.0345395	0.0688172	0.0590829	0.0202808	0.0515021	0.0478424	NA	0.0740741	0.00455927	0.0246575	0.0389785	0.0487106	0	0.0332734	0.0256158	0.0395833	0.00802568	NA	NA	NA	0.12782	0.0122249	0.0133185	0.0983607	0	0	0	NA	0.0324594
CpG_635	chr15	84756677	+	0.0901639	0.122024	0.0519481	0.0344828	0.0547112	0.012931	0.0743802	0.0258216	0.156695	0.0536585	0.038961	0.0911765	0.0477528	NA	0.0509709	0.0786164	0.0689127	0.0797342	0.0946237	0.12444	0.126168	0.0535332	0.101983	NA	0.123223	0.0932722	0.238095	0.0495979	0.125	0.0460993	0.0513977	0.0903674	0.110187	0.0722311	NA	NA	NA	0.182163	0.115337	0.0723026	0.101695	0	0	0	NA	0.0371795
CpG_636	chr15	84756679	+	0.0380795	0.0447284	0.0841424	0.0283912	0.0241692	0.0765957	0.0877551	0.00956938	0.236994	0.0726392	0.0324675	0.018018	0.0623229	NA	0.0817308	0.0246914	0.0408472	0.047138	0.0824295	0.0223214	0.0572755	0.0424628	0.0621469	NA	0.00925926	0.0271084	0.027248	0.0412783	0.0559541	0.0528169	0.0090009	0.0597166	0.0320248	0.0514469	NA	NA	NA	0.162879	0.0599022	0.0523969	0.0166667	0	0	0	NA	0.03875
CpG_637	chr15	84756688	+	0.02589	0	0.0189873	0	0.00595238	0.025	0.0725806	0.0185185	0.0795455	0.0191388	0	0	0.0274725	NA	0.014218	0.00606061	0.0209581	0.0262295	0.0508475	0.0418118	0	0.00843882	0.0419708	NA	0	0.0505952	0.027027	0	0.0140056	0	0.0246046	0.023301	0.0245902	0	NA	NA	NA	0.0481481	0.0531401	0.00217865	0	0	0	0	NA	0.0169903
CpG_638	chr15	84756703	+	0.0649351	0.0581395	0.101266	0.0853659	0.0892857	0.05	0.0609756	0.0825688	0.0782123	0.119617	0.0125786	0.0465116	0.0552486	NA	0.113744	0.0121212	0.0538922	0.0522876	0.0680851	0.053913	0.106707	0.00423729	0.0954128	NA	0.00917431	0.10479	0.0540541	0.0106383	0.0784314	0.041958	0.0392857	0.0718447	0.0826446	0.056962	NA	NA	NA	0.180812	0.0869565	0.059081	0	0	0	0	NA	0.0364078
CpG_639	chr15	84756707	+	0	0.0174419	0.0828025	0.00609756	0.00595238	0	0.0443548	0.0137615	0.100559	0.0191388	0	0	0.0384615	NA	0.0235849	0.0242424	0.0239521	0.0197368	0.00423729	0.0121739	0.00303951	0.00840336	0.0638686	NA	0	0.0178571	0.0540541	0.00261097	0.0728291	0	0.0245614	0.0194553	0.0141988	0.022293	NA	NA	NA	0.0888889	0.0360577	0.0502183	0	0	0	1	NA	0.0242718
CpG_640	chr15	85326518	-	0.708333	0.746244	0.78119	0.67439	0.748344	0.793893	0.804742	0.657931	0.806967	0.729885	0.768595	0.697602	0.789847	0.7	0.701079	0.681066	0.641679	0.786477	0.816406	0.735577	0.749767	0.775403	0.725155	0.704673	0.658419	0.743337	0.682604	0.681769	0.66792	0.685466	0.69691	0.730143	0.750701	0.715424	1	0.672897	0.812672	0.773692	0.761307	0.779829	0.832766	0.6624	0.934146	0.893491	0.881779	0.700885
CpG_641	chr15	85326535	-	0.690877	0.817726	0.748806	0.67561	0.621849	0.758003	0.789621	0.740331	0.813043	0.718147	0.807453	0.778243	0.816038	0.746154	0.726154	0.741252	0.694737	0.748214	0.811823	0.734226	0.803226	0.768832	0.809281	0.820037	0.733788	0.786112	0.746817	0.730155	0.714052	0.764316	0.727848	0.759302	0.761905	0.761175	1	1	0.616022	0.742685	0.730975	0.742904	0.864839	0.797956	1	0.604678	0.801275	0.702947
CpG_642	chr15	85326610	-	0.628875	0.775374	0.717268	0.691554	0.801964	0.743363	0.805755	0.752055	0.762663	0.73805	0.866803	0.724174	0.689615	0.541985	0.725191	0.648352	0.75997	0.781915	0.812016	0.771967	0.792444	0.740953	0.795272	0.936131	0.718539	0.749739	0.717829	0.741784	0.649321	0.663335	0.684922	0.75544	0.784426	0.757935	1	1	0.910569	0.783784	0.773339	0.785322	0.815414	0.694228	0.942857	0.839348	0.721398	0.686184
CpG_643	chr15	85538502	-	0.557138	0.646453	0.596237	0.529826	0.594633	0.563438	0.658465	0.586054	0.634733	0.534085	0.594595	0.562266	0.652053	1	0.630005	0.51362	0.614684	0.578167	0.664997	0.597222	0.626955	0.619594	0.63377	0.452756	0.652531	0.541434	0.502827	0.521676	0.495222	0.485588	0.503555	0.667031	0.601101	0.609727	NA	NA	0.90678	0.631046	0.646161	0.63877	0.758095	0.467626	NA	0.57732	0.464088	0.574874
CpG_644	chr15	85538577	-	0.741289	0.828116	0.75	0.783728	0.817009	0.758137	0.754459	0.722066	0.769604	0.73561	0.782825	0.747302	0.77703	1	0.772291	0.731306	0.712882	0.73652	0.793298	0.758412	0.742495	0.819827	0.776592	1	0.69852	0.734169	0.721649	0.71612	0.711635	0.722445	0.733278	0.792783	0.759162	0.770051	NA	NA	0.780992	0.780199	0.794531	0.778264	0.821892	0.871429	NA	0.428571	1	0.740955
CpG_645	chr15	85671794	+	0	0.0055788	0.00130548	0.0104012	0.00253485	0	0.0101911	0	0.00689655	0	0	0.00242718	0.00114679	0	0.00151745	0.00974659	0.00132275	0	0	0.0013876	0.00566135	0.000672948	0.00648298	0	0	0.0035533	0	0.0274086	0.00946832	0	0.000621504	0.00277136	0.00607903	0.00535906	NA	NA	0	0.00786713	0.0102533	0.00234192	0	0	NA	0	0	0.01772
CpG_646	chr15	85671801	+	0	0.0121786	0.011658	0	0.00125945	0	0.00254777	0.012987	0.0191518	0	0	0.02657	0.00913242	0	0.030349	0.00192678	0.00646831	0	0	0	0.0276498	0.000672043	0.012053	0	0.00135135	0.00152905	0	0.0166113	0.00800582	0	0.0123993	0	0.00303767	0.00857449	NA	NA	0	0.0008726	0.0148633	0.00351906	0	0	NA	0.0163934	0	0.0112094
CpG_647	chr15	85671807	+	0.00586166	0.00948509	0.0143416	0.0102941	0.0012837	0	0.00127551	0.001443	0.00819672	0	0	0.0253623	0.00114155	0	0	0	0.00516796	0	0.00922509	0.00459559	0.00358423	0.0108475	0.00606306	0	0	0.000506586	0	0	0.00073046	0	0.00185989	0.0124081	0	0	NA	NA	0	0.0008726	0	0.00410076	0	0	NA	0	0	0.0188568
CpG_648	chr15	85671809	+	0.00937866	0.00272109	0.00788436	0.00884956	0.00501882	0.00875912	0.00382166	0.0231214	0.00546448	0	0.00200401	0.00120919	0.0136986	0	0.0091047	0	0.0129366	0	0	0.00695088	0.0112705	0.0107527	0.0108477	0	0.00135318	0.0070922	0.0137283	0	0.00947522	0.0140998	0.00930521	0.0146991	0.00365854	0	NA	NA	0	0.0008726	0.00178784	0.00468384	0.0049505	0	NA	0.0163934	0	0.00237107
CpG_649	chr15	85671816	+	0	0	0.011658	0	0.0177215	0.00584795	0	0	0.00136612	0.00634921	0	0	0	0	0	0.00191939	0	0	0.00183486	0.00597426	0.0143443	0.00672043	0.011254	0.00413223	0.00540541	0.00759878	0.000715308	0.0215768	0.00145666	0.00108342	0.00620347	0.0105893	0.000607903	0	NA	NA	0.00680272	0.0008726	0.00951249	0.00294291	0	0	NA	0	0	0.00534125
CpG_650	chr15	85671824	+	0.00352113	0.0218579	0.0104439	0	0.0112923	0	0	0	0.0163934	0.0031746	0	0.0108827	0.00228311	0	0.00455927	0	0	0.0203443	0	0.0045977	0.0138249	0.00806994	0.0241061	0	0	0.00202634	0.000710732	0	0.00437956	0.0010846	0	0.00368834	0	0	NA	NA	0	0.0158033	0.00357356	0.00527241	0	0	NA	0	0	0.0159104
CpG_651	chr15	85671837	+	0.0118133	0.0109141	0	0	0	0	0	0	0	0.000801282	0.0141557	0.0152625	0	0	0.00384025	0.0106589	0.00130124	0	0.00185185	0.0131858	0.0094687	0	0.0109121	0	0	0	0.0014477	0.00466695	0.00782414	0	0	0	0.011577	0	NA	NA	0	0.000887311	0.0100671	0.0050883	0	0.00134048	NA	0	0	0.000302847
CpG_652	chr15	85671847	+	0	0	0.014906	0	0	0.0211988	0	0	0.0102951	0	0	0	0.0194064	0	0	0.0287632	0.000646831	0	0.00183486	0.00184204	0	0.0107817	0.00884422	0	0	0.000507357	0.000710732	0	0.00587803	0	0.000621504	0	0.0115572	0	NA	NA	0	0	0.00297089	0.0100088	0	0	NA	0	0	0.00771513
CpG_653	chr15	85671872	+	0.00470588	0.000679348	0	0.0014771	0	0	0.0161603	0	0.00959561	0.0135458	0.00100301	0.00485437	0.00172018	0	0.000760456	0	0.0161917	0.000783699	0	0.00138185	0.0282124	0.00269542	0.0110664	0	0	0.000507099	0.00854093	0	0.0113015	0.00108578	0.00248602	0.00277072	0.00426959	0.00107469	NA	NA	0	0.00524476	0.00954654	0.007034	0	0	NA	0	0	0.00594001
CpG_654	chr15	85671879	+	0.0129564	0.00407056	0.00649351	0.00589971	0	0	0.0102828	0	0.0261348	0	0.0143149	0	0	0	0	0	0.00388601	0	0	0.0162564	0.0145909	0.00135777	0.0126016	0	0.0191257	0.0072314	0.0100358	0.0084317	0.0117474	0	0.00687071	0.00371058	0.00676507	0	NA	NA	0	0.0282436	0.00240096	0.00652819	0	0	NA	0	0	0.0101371
CpG_655	chr15	85671889	+	0	0	0	0	0.00506329	0	0	0	0.00136986	0	0.016129	0.0133172	0.00799087	0	0	0	0	0.0125196	0.00735294	0.00276243	0.011807	0	0.00442834	0	0.0189445	0.00050813	0	0	0.00582666	0.0466377	0.00498132	0.00230203	0.00609756	0	NA	NA	0	0.0104895	0.00718993	0.00940071	0	0	NA	0	0	0.00236546
CpG_656	chr15	85671903	+	0.00468933	0.0176391	0.00390117	0.00147059	0	0.00146413	0.00892857	0.00433526	0	0	0	0	0.00570776	0	0.00152439	0.0306513	0.0259067	0.015625	0	0.00873965	0.00564972	0.00134953	0.00241935	0	0.00542005	0.00254065	0	0.0226891	0.00729927	0.0206298	0.0143571	0.00969977	0.000611621	0.0322581	NA	NA	0	0.00786026	0.000594884	0.0182353	0.0372208	0	NA	0	0	0.00767868
CpG_657	chr15	85671906	+	0.014068	0.0162382	0.0156658	0	0.0113065	0.0176471	0	0.00433526	0.00958904	0.00476948	0.0140562	0.00121212	0.0126002	0	0	0	0	0	0	0.00461042	0.0194772	0.0141605	0.0230024	0	0	0.00355691	0	0.0149875	0	0	0.00497512	0.00417053	0.00974421	0.0196937	NA	NA	0	0.00789474	0.00778443	0	0	0	NA	0	0	0.014218
CpG_658	chr15	85673531	-	0.0560065	0.0425417	0.0711864	0.0930116	0.0507246	0.0437768	0.0414069	0.047619	0.0666971	0.0517986	0.0864473	0.0602362	0.0675991	0.0955414	0.0540541	0.07242	0.081295	0.049105	0.0482516	0.0567248	0.0669075	0.0928553	0.0576229	0.0714358	0.083648	0.0636904	0.071457	0.0696625	0.0777908	0.0882775	0.0480412	0.0536162	0.0548574	0.0692151	0.0559846	0.144377	0.0670603	0.0522607	0.0633817	0.060317	0.0566426	0.058227	0.0362243	0.0536309	0.0627137	0.0503197
CpG_659	chr15	85673573	-	0.068131	0.0475551	0.0801082	0.0946014	0.0609756	0.0528464	0.0788594	0.0531977	0.0778361	0.083815	0.0961271	0.0628819	0.0637164	0.0817844	0.0793839	0.0698164	0.0942333	0.0676755	0.0588794	0.0701726	0.0810009	0.0967685	0.0723709	0.0814244	0.0822012	0.0746047	0.0847314	0.0830686	0.0890219	0.110308	0.058308	0.0607987	0.0675213	0.0826252	0.0561471	0.153228	0.0928829	0.0651073	0.0737329	0.0690614	0.0675531	0.0811891	0.0624945	0.0458011	0.0726779	0.0623132
CpG_660	chr15	85685523	+	0.27239	0.680058	0.670266	0.367054	0.649123	0.407428	0.664721	0.320599	0.544781	0.391913	0.695785	0.391074	0.704797	0.324069	0.735	0.352011	0.616168	0.427387	0.645271	0.592972	0.645434	0.617927	0.631742	0.514468	0.63238	0.423459	0.387839	0.41336	0.414954	0.391506	0.35337	0.646913	0.66576	0.649059	0.735983	0.491787	0.471206	0.67055	0.67087	0.67838	0.671647	0.6734	0.697438	0.41841	0.429664	0.430469
CpG_661	chr15	85709609	-	0.00789889	0.0218498	0.0444381	0.0158282	0.0242524	0.0129045	0.03112	0.0181132	0.0358387	0.0184376	0.0408401	0.0154893	0.0327111	0.00909704	0.0299368	0.0121585	0.0246532	0.0104632	0.0370624	0.0286714	0.0297243	0.051152	0.041528	0.0432826	0.0429032	0.0362128	0.02264	0.0159104	0.0179562	0.0219535	0.0138361	0.0244337	0.0354187	0.0428251	0.00426212	0.0316931	0.0201117	0.0324835	0.0338777	0.0260117	0.0290166	0.03146	0.0309933	0.0140475	0.0195201	0.0217048
CpG_662	chr15	85709632	-	0.0125	0.0194041	0.0172022	0.0098712	0.0104994	0.00815739	0.0159521	0.00308572	0.015782	0.00900901	0.0278135	0.0098615	0.026192	0.0102867	0.0197332	0.00730974	0.0126924	0.00819493	0.0174528	0.0157348	0.021036	0.02583	0.0222433	0.0227231	0.0320433	0.0190372	0.0134958	0.0154081	0.0121403	0.0126431	0.00889148	0.0109767	0.0202357	0.0214551	0.0314583	0.0180647	0.00931824	0.0123925	0.0146321	0.014164	0.0188422	0.015508	0.010417	0.00867983	0.0145158	0.00951518
CpG_663	chr15	85709676	-	0.0219459	0.0395784	0.0596284	0.019084	0.0512679	0.0320326	0.0455383	0.0364986	0.0642017	0.0292711	0.0760664	0.0307896	0.0690523	0.0193906	0.0708098	0.0218715	0.0401619	0.0251279	0.0500634	0.0543948	0.056332	0.0650227	0.0528478	0.0629575	0.0535012	0.0528133	0.0393184	0.035806	0.0275081	0.0356911	0.0297831	0.0435707	0.0673388	0.0502765	0.0260586	0.0368859	0.0287292	0.0594056	0.0610316	0.0528513	0.0579265	0.0481182	0.0298011	0.0382452	0.0255564	0.0329014
CpG_664	chr15	98606711	-	0.870217	0.88049	0.887092	0.858538	0.898627	0.881242	0.909416	0.902017	0.919736	0.907085	0.934488	0.88443	0.901523	0.768519	0.906294	0.886555	0.916696	0.876299	0.924158	0.89195	0.884987	0.912501	0.891264	0.919665	0.890516	0.872339	0.857293	0.857408	0.858719	0.860152	0.87472	0.901042	0.904695	0.904924	0.917431	0.953004	0.879181	0.896899	0.909167	0.898751	0.895682	0.8828	0.878739	0.897772	0.872846	0.869017
CpG_665	chr15	98606722	-	0.931072	0.943648	0.910457	0.902844	0.927562	0.93151	0.940621	0.967062	0.941188	0.919666	0.973341	0.919397	0.942456	0.93277	0.936276	0.927601	0.953704	0.92461	0.939472	0.923037	0.941742	0.942201	0.945309	0.94837	0.926879	0.915939	0.920477	0.91751	0.908374	0.910714	0.934101	0.939926	0.941595	0.92996	1	0.909414	0.931512	0.939024	0.936724	0.93857	0.930461	0.921621	0.928922	0.926332	0.92774	0.919514
CpG_666	chr15	98606735	-	0.835797	0.842737	0.854127	0.78314	0.814546	0.806042	0.892408	0.853392	0.871369	0.889949	0.876298	0.832333	0.850507	0.80476	0.858971	0.852299	0.851283	0.841061	0.847032	0.815955	0.84863	0.853149	0.848175	0.84322	0.877644	0.820372	0.813113	0.814635	0.800906	0.818438	0.832988	0.854477	0.851113	0.844771	0.783105	0.722554	0.863652	0.853062	0.844216	0.83277	0.819595	0.84527	0.850406	0.817278	0.805368	0.785424
CpG_667	chr15	98606767	-	0.90587	0.878148	0.860226	0.828957	0.865888	0.884547	0.927239	0.84468	0.936128	0.877193	0.938054	0.885483	0.914902	0.951419	0.895017	0.880835	0.897735	0.871615	0.884742	0.886031	0.900953	0.907197	0.890173	0.902645	0.898589	0.866243	0.852749	0.835405	0.840576	0.855298	0.876126	0.891821	0.88962	0.879834	0.841984	0.941369	0.866501	0.870687	0.884562	0.887418	0.897471	0.888033	0.880238	0.889673	0.854658	0.881823
CpG_668	chr15	98606810	-	0.646796	0.684997	0.691295	0.6037	0.692651	0.691463	0.729651	0.667869	0.738683	0.711561	0.745109	0.699583	0.680321	0.736045	0.667918	0.694015	0.704448	0.687739	0.713647	0.717114	0.717131	0.740326	0.726082	0.701314	0.749741	0.677235	0.645662	0.636825	0.636119	0.643011	0.684367	0.709453	0.712042	0.715655	0.807692	0.681338	0.707211	0.705355	0.709046	0.697755	0.722474	0.750464	0.710926	0.725488	0.668598	0.676527
CpG_669	chr15	98606817	-	0.854821	0.85033	0.85678	0.819659	0.837864	0.878914	0.90216	0.846708	0.887683	0.879779	0.86954	0.863329	0.85924	0.890307	0.851478	0.861275	0.853721	0.867392	0.879534	0.855053	0.86142	0.890156	0.86254	0.844751	0.873403	0.840045	0.808538	0.819743	0.798773	0.834644	0.844413	0.850684	0.860611	0.85163	0.900452	0.873239	0.874002	0.850063	0.858147	0.853902	0.877066	0.840497	0.902366	0.870319	0.837964	0.855565
CpG_670	chr15	98780482	+	0.244253	0.398964	0.27566	0.249201	0.404762	0.363636	0.334337	0.417293	0.411638	0.153846	0.406863	0.227778	0.354582	NA	0.29562	0.312997	0.432432	0.470948	0.385382	0.282051	0.439024	0	0.18797	NA	0.510638	0.417722	0.169811	0.302013	0.198582	0.376623	0.341463	0.27907	0.364865	0.354839	NA	NA	NA	0.326316	0.341667	0.357798	0	NA	0	NA	NA	0.320388
CpG_671	chr15	98780491	+	0.174419	0.377005	0.263554	0.14918	0.20996	0.24252	0.223077	0.0484496	0.265193	0.179439	0.228205	0.205714	0.25102	NA	0.188082	0.209459	0.282007	0.374022	0.290816	0.191781	0.108974	0	0.220884	NA	0.5	0.134228	0.17	0.034965	0.135338	0.0135135	0.305913	0.0322581	0.24911	0.289773	NA	NA	NA	0.205556	0.121076	0.0288462	0	NA	0	NA	NA	0.269841
CpG_672	chr15	98780510	+	0.295488	0.50134	0.300752	0.172131	0.377027	0.3125	0.488444	0.224138	0.409241	0.235185	0.441624	0.215909	0.279592	NA	0.256075	0.260929	0.38676	0.415361	0.269492	0.194631	0.263158	0	0.355469	NA	0.677419	0.116883	0.175258	0.315789	0.228261	0.0135135	0.147959	0.219124	0.368421	0.370166	NA	NA	NA	0.263441	0.256637	0.267327	0	NA	1	NA	NA	0.175258
CpG_673	chr15	98780539	+	0.279412	0.516304	0.569697	0.348837	0.468665	0.330189	0.518987	0.432	0.681716	0.267925	0.557214	0.347059	0.304167	NA	0.319392	0.440217	0.428058	0.481013	0.541958	0.378378	0.444444	0.0363636	0.421488	NA	0.704545	0.519481	0.666667	0.532847	0.248062	0.0142857	0.39899	0.282258	0.426471	0.382022	NA	NA	NA	0.384615	0.25641	0.455446	1	NA	1	NA	NA	0.25
CpG_674	chr15	98780554	+	0.545723	0.654054	0.526946	0.573333	0.614325	0.659164	0.538462	0.531008	0.731111	0.431734	0.713568	0.523256	0.420833	NA	0.440299	0.568306	0.520979	0.601881	0.586207	0.397436	0.555556	0.473684	0.645161	NA	1	0.402597	0.320755	0.402878	0.328571	0.197368	0.557789	0.320312	0.447552	0.274725	NA	NA	NA	0.548387	0.254237	0.320388	1	NA	1	NA	NA	0.584158
CpG_675	chr15	99199889	+	0.96625	0.920968	0.910047	0.947445	0.942513	0.946288	0.879819	0.937873	0.919718	0.936813	0.87747	0.952321	0.92142	0.933702	0.904694	0.924743	0.90836	0.94733	0.93321	0.935007	0.935747	0.940651	0.911722	0.891029	0.960608	0.94391	0.915254	0.928387	0.937296	0.943254	0.931993	0.942483	0.931457	0.960929	1	1	0.973118	0.939001	0.92984	0.93155	0.96659	0.971851	0.96478	0.892493	0.945282	0.918359
CpG_676	chr15	99199894	+	0.98239	0.93871	0.934195	0.959064	0.962517	0.968102	0.925799	0.97485	0.943423	0.982069	0.920319	0.941992	0.969582	1	0.939481	0.940435	0.965323	0.944772	0.965677	0.964092	0.960526	0.963701	0.963592	0.944568	0.974562	0.962713	0.960297	0.950309	0.977802	0.965653	0.944687	0.961814	0.944262	0.971503	1	1	0.965766	0.960386	0.957437	0.958465	0.972824	0.980986	1	0.934518	0.9787	0.957261
CpG_677	chr15	99199897	+	0.896071	0.858065	0.898246	0.874269	0.928	0.952381	0.840909	0.895933	0.908322	0.893004	0.851485	0.89434	0.883483	0.933702	0.913229	0.853855	0.887994	0.901543	0.896296	0.913659	0.907249	0.907177	0.899952	0.925743	0.958873	0.911586	0.913345	0.897229	0.924051	0.906269	0.908303	0.917922	0.899964	0.923869	1	1	0.983021	0.895823	0.923008	0.91876	0.954774	0.941135	0.965	0.960111	0.945343	0.909405
CpG_678	chr15	99199908	+	0.934591	0.925446	0.936694	0.947291	0.981233	0.968254	0.924915	0.969988	0.911142	0.964039	0.946429	0.953283	0.966921	0.955556	0.950284	0.948513	0.927302	0.956618	0.953532	0.962909	0.936965	0.945101	0.947394	0.990628	0.957207	0.960948	0.951061	0.951353	0.966426	0.961655	0.948512	0.954347	0.958183	0.963522	1	0.94697	0.93387	0.935221	0.943338	0.960221	0.97075	0.976875	0.915106	0.973123	0.996659	0.943656
CpG_679	chr15	99199937	+	0.888337	0.853035	0.846868	0.874269	0.87037	0.915625	0.874157	0.897129	0.859944	0.894022	0.839844	0.907731	0.898734	0.891304	0.935211	0.893905	0.869355	0.912917	0.860037	0.913462	0.908766	0.89351	0.906933	0.816304	0.939933	0.904672	0.911815	0.882091	0.905647	0.872771	0.914586	0.90625	0.899787	0.923747	1	0.970588	0.871705	0.895537	0.910761	0.911833	0.943431	0.961272	0.965517	0.937729	0.889989	0.903748
CpG_680	chr15	99199953	+	0.976864	0.967105	0.950704	0.981982	0.96206	0.973684	0.946136	0.987715	0.929204	0.975207	0.959184	0.940104	0.968421	0.921348	0.973913	0.948837	0.963696	0.957958	0.922787	0.952885	0.973262	0.965278	0.954588	0.948802	0.971079	0.970923	0.944397	0.949077	0.954089	0.955384	0.965789	0.966537	0.958126	0.970972	1	0.904412	0.950877	0.961977	0.961505	0.967568	0.979167	0.979138	0.958025	0.95073	0.976872	0.971039
CpG_681	chr15	102144281	+	0.354565	0.216931	0.266771	0.189781	0.171779	0.280093	0.248764	0.232877	0.271074	0.119534	0.334247	0.246719	0.306636	NA	0.355357	0.35175	0.200739	0.262827	0.222222	0.269677	0.216634	0.335859	0.247153	0.0136986	0.590164	0.371773	0.340659	0.190805	0.28202	0.572464	0.278939	0.245317	0.219731	0.158598	NA	NA	NA	0.262651	0.166227	0.271823	0.440559	0	NA	NA	NA	0.285363
CpG_682	chr15	102144285	+	0.403805	0.260638	0.351648	0.322034	0.213992	0.357143	0.28524	0.235756	0.284768	0.405882	0.433702	0.328947	0.290993	NA	0.36136	0.350649	0.30855	0.298742	0.241653	0.27474	0.269231	0.275949	0.303167	0	0.541436	0.463793	0.387187	0.296552	0.326757	0.553398	0.302419	0.275492	0.255605	0.208333	NA	NA	NA	0.417073	0.216535	0.339956	0.302817	0.821429	NA	NA	NA	0.28642
CpG_683	chr15	102144343	+	0.289089	0.185612	0.331933	0.152564	0.130482	0.154613	0.159051	0.143305	0.326872	0.139717	0.297965	0.220651	0.185366	NA	0.238281	0.203796	0.238411	0.17191	0.142735	0.208745	0.186848	0.204482	0.195572	0.00719424	0.41018	0.185634	0.200306	0.191327	0.169147	0.361333	0.15688	0.143282	0.261111	0.153493	NA	NA	NA	0.237845	0.169186	0.159341	0.362934	0.807692	NA	NA	NA	0.250845
CpG_684	chr15	102144346	+	0.354072	0.285081	0.373412	0.194553	0.25627	0.273408	0.308165	0.257592	0.29938	0.383518	0.407353	0.210072	0.306373	NA	0.385672	0.258586	0.293962	0.295506	0.21694	0.298433	0.306316	0.246827	0.289837	0	0.612805	0.390152	0.31145	0.272611	0.250683	0.463382	0.269673	0.219524	0.352868	0.201681	NA	NA	NA	0.301316	0.228261	0.340544	0.220077	0	NA	NA	NA	0.285324
CpG_685	chr15	102144369	+	0.0766046	0.134565	0.123839	0.0785714	0.114053	0.0983982	0.140523	0.120858	0.152961	0.0784884	0.245902	0.073107	0.118182	NA	0.152482	0.113553	0.192918	0.0956341	0.11041	0.0806658	0.170778	0.100503	0.124719	0	0.296703	0.14726	0.127778	0.144812	0.108537	0.2	0.0652174	0.110717	0.153333	0.0563847	NA	NA	NA	0.0904762	0.126302	0.171585	0.434483	0	NA	NA	NA	0.0870647
CpG_686	chr15	102460470	-	0.807594	0.821216	0.838273	0.795683	0.859279	0.845124	0.877822	0.839156	0.853999	0.827424	0.836785	0.854444	0.859797	1	0.815946	0.796732	0.85836	0.806726	0.86744	0.845645	0.849974	0.86437	0.858878	0.813457	0.833003	0.82891	0.808455	0.81488	0.841314	0.869558	0.813225	0.833178	0.81517	0.863374	1	0.385214	0.731777	0.840159	0.83687	0.862324	0.879994	0.902522	0.935178	0.872607	0.849428	0.803899
CpG_687	chr15	102460502	-	0.620318	0.739488	0.775229	0.612426	0.783804	0.717981	0.780864	0.711321	0.833565	0.763359	0.807087	0.676343	0.759862	0.615819	0.802059	0.647228	0.795648	0.679768	0.817869	0.75771	0.785455	0.775544	0.770097	0.805525	0.788902	0.706234	0.719154	0.648997	0.708056	0.727242	0.725154	0.770255	0.770625	0.784754	1	0.384615	0.745506	0.8125	0.762978	0.78813	0.791501	0.848722	0.861371	0.727807	0.747964	0.695266
CpG_688	chr15	102460507	-	0.381356	0.615174	0.614599	0.44	0.6356	0.523028	0.633333	0.509422	0.694077	0.650927	0.661433	0.512044	0.670816	0.418079	0.637371	0.486138	0.675159	0.582811	0.662562	0.613352	0.628638	0.692292	0.633486	0.791667	0.666265	0.576792	0.576608	0.464261	0.555708	0.596882	0.505695	0.639201	0.648199	0.66415	1	0.387597	0.707386	0.648428	0.642513	0.658491	0.729822	0.696242	0.733229	0.662312	0.575566	0.544121
CpG_689	chr16	10502161	-	0.240323	0.364303	0.442786	0.22063	0.441791	0.349624	0.433387	0.344423	0.36747	0.284238	0.471299	0.289515	0.523973	0.256329	0.460199	0.265583	0.350711	0.301397	0.419929	0.345532	0.381073	0.370623	0.366743	0.312629	0.321731	0.314937	0.264159	0.251129	0.251698	0.265249	0.266097	0.355269	0.385428	0.371641	1	0.00938967	0.199805	0.393006	0.390012	0.374639	0.376783	0.366092	0.554031	0.231141	0.304291	0.268059
CpG_690	chr16	10502210	-	0.216019	0.132053	0.209493	0.142454	0.161841	0.166981	0.153226	0.11531	0.17495	0.102922	0.158571	0.196608	0.188776	0.28189	0.240491	0.156969	0.246139	0.141562	0.202576	0.152266	0.176052	0.123723	0.121687	0.127931	0.154171	0.102464	0.173288	0.121212	0.112969	0.139473	0.129583	0.134044	0.160942	0.208077	0	0.118203	0.0423152	0.184087	0.166371	0.164921	0.181885	0.217054	0.341588	0.11697	0.125447	0.172151
CpG_691	chr16	10502242	-	0.513688	0.57385	0.518272	0.580737	0.586466	0.573864	0.540323	0.532164	0.605578	0.456186	0.659026	0.543171	0.584642	0.501587	0.576355	0.578591	0.541311	0.692615	0.706776	0.605907	0.533361	0.57883	0.577626	0.450587	0.630658	0.503444	0.575116	0.562588	0.541626	0.561866	0.553108	0.578661	0.673609	0.540575	0.0666667	0.867925	0.826002	0.65942	0.612878	0.607948	0.645987	0.585789	0.678451	0.696828	0.587126	0.648876
CpG_692	chr16	10503820	+	0.830048	0.848158	0.826675	0.728395	0.78152	0.805097	0.805436	0.776233	0.811682	0.775322	0.79721	0.775395	0.83649	0.805556	0.808446	0.724363	0.781085	0.781673	0.824891	0.80613	0.807227	0.828268	0.826456	0.837005	0.837984	0.806684	0.779151	0.802342	0.794007	0.794834	0.806874	0.807186	0.83213	0.83581	1	1	0.702194	0.818453	0.805618	0.830997	0.829787	0.901629	0.961538	0.904372	0.892216	0.789542
CpG_693	chr16	13448545	+	0	0	0	0.0111288	0	0.001002	0	0.00436681	0.00721587	0.0090978	0.0102041	0	0.018018	0	0	0.000951475	0.00322711	0.00335711	0.000978474	0.00247433	0.00348979	0.00270051	0.00873587	0	0	0.00856816	0.00088574	0.00338028	0.00637774	0.00412229	0.000350631	0.00391045	0.00877931	0.000223364	NA	NA	NA	0	0.00223714	0.00188014	0.00152207	0	0	0	0	0.000125992
CpG_694	chr16	13448556	+	0	0.00199402	0	0.0246423	0.00331126	0.0150451	0	0.0115858	0.00484555	0.00075815	0	0	0.0120391	0	0.00154083	0	0.00241352	0.00962343	0.0014627	0.00284231	0.00173974	0.00592992	0.00255853	0.00319489	0	0.00285551	0.00117612	0.00548523	0.00664164	0.0095792	0.00407593	0.0031186	0.00502813	0.0102518	NA	NA	NA	0.0031811	0.000445087	0.00375807	0	0	0	0	0	0.00188632
CpG_695	chr16	13448569	+	0.000637349	0.00799201	0	0.00318979	0	0	0	0.00145243	0.000601323	0.00532725	0.011213	0.000642261	0	0	0	0	0.0012053	0	0.00292969	0.0043146	0.002442	0.000269542	0.00626759	0	0.0277981	0.000380011	0.000293772	0.00225479	0.00462227	0	0.00326036	0.00175558	0.0046701	0	NA	NA	NA	0.00022604	0.00222519	0.00223214	0	0	0	0	0	0.000627195
CpG_696	chr16	13448582	+	0.00696643	0	0.0130385	0.00953895	0.00662252	0.00100301	0.00246508	0.0021978	0.00723764	0.0121396	0.00204499	0.01287	0	0	0	0.00522565	0.00724346	0.00251046	0.0146341	0.00678426	0.00487465	0	0.0134443	0	0	0.00552802	0.00439883	0.00309467	0.00781137	0.010555	0.00654053	0.00976181	0.00540022	0.00715084	NA	NA	NA	0.000226244	0.000779857	0.00492726	0	0.00331126	0.00769231	0	0	0.00678989
CpG_697	chr16	13448587	+	0	0.00399202	0	0.00159236	0.00664452	0.01001	0	0.00434468	0.00722022	0.00303721	0.00204082	0.0032175	0	0	0.0138996	0.0023855	0.0121065	0.0058651	0.0136919	0.0121242	0.00593265	0.0110751	0.0192184	0	0.000726744	0.00362388	0.0111404	0.0199124	0.00882523	0.0320163	0.00735552	0.00742986	0.00864138	0.00425151	NA	NA	NA	0.00226706	0.0129262	0.00634249	0	0	0.395349	0	0	0.00226387
CpG_698	chr16	13448595	+	0.00380228	0	0.00396601	0.00638468	0.00578991	0	0	0.00581395	0.0114804	0.00152207	0.0061287	0.0051713	0	0	0.00933852	0.000956023	0.00724346	0.00209468	0.00684262	0.00889988	0.012583	0.0092291	0.0116682	0	0	0.0177922	0.0123894	0.00511727	0.0052121	0.00341297	0.00467782	0.0035225	0.00312876	0	NA	NA	NA	0.00635641	0.00613497	0.0031746	0	0	0.404669	0	0	0.00693132
CpG_699	chr16	13448607	+	0.00126582	0.00199601	0.00339367	0.0143312	0.01	0	0	0.00869565	0.00600962	0.0136364	0.00203666	0.00256739	0.0030303	NA	0	0.00759734	0.00803213	0.00251046	0.00097561	0.00197385	0.00243478	0.000539374	0.00794261	0	0	0.00570994	0.0111372	0.00646249	0.00780798	0	0.00536756	0.00468933	0.0035954	0.00357143	NA	NA	NA	0	0.00311596	0.00422238	0	0	0	0	0	0.00301659
CpG_700	chr16	13448609	+	0.00505689	0.0059761	0	0.0127389	0.0115702	0.002	0.00491803	0.00144718	0	0.0030303	0.00407332	0	0	NA	0	0.0142586	0.00321285	0.00253593	0.00195122	0.00346535	0.00452017	0.0091447	0.00409836	0	0	0.00265957	0	0	0.00201962	0.00408719	0.00279525	0.00564862	0.00478813	0.00668747	NA	NA	NA	0.00361827	0.00400356	0.0016405	0	0	0	0	0	0.00075358
CpG_701	chr16	16303531	-	0.00514359	0.00920245	0.00350515	0.00541565	0.000470367	0.00742645	0.000404449	0.000438212	0.0061244	0.0018917	0.00408163	0.00420787	0.00506116	0	0.000947194	0.00340467	0.00693481	0.00630749	0.00429539	0.00228728	0.0046273	0.00826278	0.00277539	0.000372995	0.0085873	0.00203268	0.00367342	0.0059186	0.00408269	0.00184041	0.00208059	0.00412088	0.00180505	0.00209996	0	0	0	0.00800547	0.00688412	0.00305623	0.00366586	0.000262398	0.000492126	0.0104241	0.000145582	0.00236551
CpG_702	chr16	16303538	-	0.00450064	0.00334355	0.00351894	0.00351732	0.00470146	0.002849	0.00871857	0.00109361	0.00860092	0.00284158	0.00582751	0.00105686	0.000422922	0	0.00261159	0.00568828	0.00528145	0.00566162	0.00645055	0.00538911	0.00321414	0.00275033	0.00698832	0	0.00538177	0.00600718	0.000355114	0.00359734	0.00369434	0.00532369	0.00443244	0.0028883	0.00518719	0.000587101	0	0	0	0.0044957	0.00556101	0.00350931	0.00475745	0.000131148	0	0.000236574	0.00639907	0.00198716
CpG_703	chr16	16303548	-	0.00732127	0.00724436	0.00413736	0.00297217	0.00776653	0.00455322	0.00263585	0.00219058	0.00636451	0.00808177	0.011069	0.00441919	0.000849437	0	0.00663193	0.00665584	0.00415512	0.00434211	0.0120701	0.00402525	0.00120919	0.00439628	0.00287522	0.000373483	0	0.00304688	0.00177999	0.00146879	0.00110569	0.00224038	0.00416638	0.00346821	0.00391478	0.00269088	0	0.00191939	0.000452182	0.0037182	0.00336645	0.00397919	0.000469962	0.00486522	0.000246731	0.00498339	0.000145688	0.00321052
CpG_704	chr16	16303569	-	0.0080429	0.00905419	0.00362019	0.00797836	0.00317386	0.0018508	0.00547279	0.00701139	0.00401722	0.000473709	0.0121452	0.000631712	0.00382044	0.00131062	0.00189708	0.00340798	0.000969798	0.0021702	0.00347625	4.56392e-05	0.00246281	0.000712795	0.00176898	0.000372995	0.000336389	0.00238374	0.00425607	0.00469383	0.00382335	0.00801577	0.00228706	0.00317506	0.00364223	0.00608094	0	0	0	0.00351151	0.00699673	0.00415412	0.00456478	6.5647e-05	0.000738734	0	0.000218293	0.00248499
CpG_705	chr16	16303577	-	0.00161169	0.00236703	0.00371364	0.00540394	0.00164493	0.00042729	0.00303613	0.00625892	0.00268534	0.00272286	0.00131062	0.0055684	0.00918788	0.00196721	0.00177578	0.00332038	0.00103921	0.00217077	0.00280737	0.00328677	0.00593233	0.00219198	0.00200755	9.32227e-05	8.41538e-05	0.00343737	0.00567544	0.00228812	0.0017161	0.00699898	0.00152555	0.0027824	0.00187758	0.00457983	0	0.0860421	0.000220022	0.00293198	0.00409115	0.00347859	0.00370876	0.00591211	0.000246154	0.000236883	0.00414787	0.00244191
CpG_706	chr16	16303585	-	0.000323834	0.00013988	0.00331881	0.000408719	0.00707464	0	0.00081616	0.00198785	0.00153374	0.00679299	0.00572771	0.00327384	0.00127402	0.00131666	0	0.00449751	0.00403422	0.000330316	0.00921544	0.00152165	0.00234311	0.00123743	0.00241721	0.000471476	0.00569292	0.00130085	0.00209656	0.000618142	0.0021308	0.000332568	0.00097998	0.00201001	0.00302824	0.00376688	0	0	0.000333741	0.00241594	0.00214778	0.000269563	0.00575823	0.000596936	0.000249252	0.000477954	0.000220816	0.00355652
CpG_707	chr16	16303587	-	0.000537288	0.00348626	0.00020749	0.00501627	0.0001178	0.000570695	0.00833927	0.00461032	0.00124545	0	0.000437445	0.00189853	0.00381437	0	0.00806069	0.00316327	0.00041684	0.0051526	0.000993542	0.00234364	0.00582426	0.000153594	0.00183	0.000282008	0.000169262	0.0054604	0.00332996	0.00237054	0.00143463	0.00244766	0.00279281	0.00480892	0.000226603	0.00152123	0	0	0.000332779	0.00191674	0.00431814	0.00195898	0.00247564	0.000396642	0.000496648	0.000238692	0.000147254	0.00319108
CpG_708	chr16	16303601	-	0.00283132	0.00141924	0.00547945	0.00747301	0.00599664	0.00173913	0.00164558	0.00504202	0.00116902	0.00487983	0.00534998	0.00129227	0.00150521	0	0.00158479	0.00475515	0.00302817	0.00421236	0.00176471	0.00291963	0.00575978	0.00997478	0.00390897	0.000423504	0.00142776	0.000482901	0.00265076	0.00379847	0.00260247	0.00196384	0.00199297	0.00222889	0.00176123	0.0028226	0	0.00106838	0.00024564	0.00280035	0.00287029	0.00217188	0.00316372	0.000589927	0.000138735	0.000536193	0.00687735	0.0014196
CpG_709	chr16	16303618	-	0.00687433	0	0.00996885	0.00598802	0.000939408	0.00456621	0.00304445	0.00568928	0.00441883	0.000474158	0.00817757	0.00126263	0.000634786	0.00130719	0.00614077	0.00469028	0.00667223	0.00131822	0.00429681	0.00521405	0.00402172	0.00244723	0.00229533	0.000186324	0.000336191	0.00351096	0.00260447	0.00440071	0.00382199	0.00111571	0.0037347	0.00418531	0.00127983	0.00234565	0	0.00191205	0	0.00331772	0.00556101	0.00328019	0.00631333	0.000262192	0.000983526	0.0186761	0.00058148	0.00381709
CpG_710	chr16	17209452	-	0.00265825	0.00346363	0.00382747	0.00223214	0.0032545	0.00303819	0.00445736	0.00384404	0.00386493	0.00522552	0.00437956	0.00256309	0.00423472	0.0222513	0.0079023	0.00550551	0.00344432	0.00294291	0.00514981	0.00248283	0.00334872	0.00185708	0.00385201	0.00213889	0.0073213	0.00259963	0.00341923	0.00341392	0.00549105	0.00199716	0.0033169	0.0028201	0.00247368	0.00343871	0.00137931	0.00465116	0.0061082	0.00508718	0.00406424	0.00293904	0.00564124	0.00113643	0.00562888	0.00183928	0.00501821	0.00447463
CpG_711	chr16	17209455	-	0.0043025	0.00396629	0.00396534	0.000889086	0.0034662	0.00518919	0.00856198	0.0049514	0.00609632	0.00524572	0.0116448	0.00593354	0.00785182	0.0137255	0.00980627	0.00564409	0.0044521	0.00279576	0.00498598	0.00286378	0.00569509	0.00460778	0.00281529	0.00281447	0.00503953	0.00380391	0.00416858	0.00172318	0.0052165	0.00356398	0.00222121	0.00422883	0.00556456	0.00514972	0	0.0122271	0.00725774	0.00217618	0.00584472	0.0029001	0.0117326	0.00232637	0.0159621	0.00665779	0.00234867	0.00512969
CpG_712	chr16	17209460	-	0.00265692	0.00717112	0.00455949	0.00629213	0.00500544	0.00564972	0.00155612	0.00551673	0.0042735	0.00414365	0.00146071	0.00694169	0.00222853	0	0.00239292	0.00565348	0.00316592	0.00471281	0.00515383	0.00463135	0.00392911	0.00396928	0.00532953	0.00561976	0.00360672	0.00405367	0.00274725	0.0044985	0.00384506	0.00361387	0.00359307	0.00386734	0.00472746	0.00257099	0	0.000870575	0.00593783	0.004693	0.00303963	0.00522502	0.00541352	0.0056097	0.00038666	0.00880974	0.00385895	0.0054724
CpG_713	chr16	17209469	-	0.00495622	0.0034662	0.00791209	0.00244553	0.00888023	0.00778547	0.00581621	0.00992465	0.00426656	0.00686436	0.00610288	0.0102382	0.0082678	0	0.00861038	0.00449177	0.00345026	0.00793767	0.00640125	0.00508559	0.00355421	0.0058588	0.0057949	0.00691995	0.00527561	0.00664859	0.00499938	0.00382844	0.00614684	0.00760313	0.00567837	0.00659358	0.00580142	0.00452815	0	0.00609933	0.00225877	0.00381895	0.00488324	0.00662277	0.00834391	0.00816975	0.00607463	0.0087747	0.00814808	0.00561762
CpG_714	chr16	17209487	-	0.0026556	0.00582188	0.00433983	0.00669344	0.00457267	0.00673767	0.00242931	0.00330791	0.00335912	0.00289296	0.00670163	0.00514801	0.00423643	0.00163666	0.00371124	0.00416493	0.00596693	0.00604274	0.00696891	0.00566073	0.00743791	0.00511895	0.00657785	0.00302865	0.00427562	0.00695617	0.00669392	0.00553223	0.00480996	0.00611048	0.00473861	0.00382121	0.00564639	0.00513051	0.00138217	0.000875529	0.0044787	0.00688633	0.00357849	0.00681444	0.00572119	0.00786842	0.00582722	0.00656788	0.00449128	0.00474278
CpG_715	chr16	17209491	-	0.0182846	0.0178571	0.0204592	0.0198616	0.0117545	0.0133377	0.0128417	0.0141544	0.0211125	0.0187019	0.0161572	0.0203136	0.0161714	0.0281506	0.0146989	0.0163034	0.013846	0.0130521	0.019378	0.0176832	0.0193702	0.0170264	0.0132867	0.0221286	0.0238337	0.014309	0.0121674	0.0124618	0.0145286	0.0129214	0.0119155	0.0154489	0.0170886	0.0132896	0.00138026	0.0154316	0.0062451	0.0153283	0.0139147	0.0157256	0.0256001	0.0189375	0.0226008	0.00992051	0.0125599	0.0159119
CpG_716	chr16	17209508	-	0.00805247	0.0038452	0.00486905	0.00167485	0.00305577	0.0108802	0.00952474	0.00570115	0.00416709	0.00165654	0.00495555	0.00473793	0.00141172	0	0.00238663	0.00949209	0.00669161	0.00198749	0.0082089	0.00614937	0.00521197	0.00312902	0.00495722	0.0047527	0.00396275	0.00515804	0.00596828	0.00604432	0.00488252	0.00537236	0.00472878	0.00636742	0.00544517	0.0049004	0.00345781	0.000875912	0.0102177	0.00729736	0.00602326	0.00735111	0.00912013	0.00770696	0.00330065	0.00820715	0.00651488	0.00651061
CpG_717	chr16	17209522	-	0.00335683	0.00350701	0.00558534	0.00382754	0.00341485	0.00548968	0.0049087	0.00650074	0.00421724	0.00890993	0.00544518	0.00670335	0.00661578	0.00199402	0.00374713	0.00414762	0.00706328	0.00597372	0.00347771	0.00675932	0.00491227	0.00582781	0.00541429	0.00892009	0.0071798	0.00575908	0.00564422	0.00530583	0.00547981	0.00507435	0.00761457	0.00449832	0.00590223	0.00394106	0.0503849	0.0011873	0.0166198	0.00525033	0.00485817	0.00682951	0.0133978	0.00317396	0.00788061	0.00467501	0.0101072	0.00608426
CpG_718	chr16	17209524	-	0.00669095	0.00643858	0.00696629	0.00805811	0.00597015	0.00652078	0.00521808	0.0085222	0.011194	0.00995792	0.0161195	0.00955446	0.00688168	0.0157033	0.00925813	0.00900442	0.00680272	0.00480048	0.00897466	0.00929906	0.00780576	0.00835942	0.00907779	0.00529435	0.00899987	0.00961397	0.00597558	0.00736409	0.00656872	0.00613131	0.00933878	0.00764891	0.0113185	0.00716068	0.000711744	0.00164868	0.00534664	0.00894755	0.00709105	0.0103789	0.0141995	0.00958122	0.00722219	0.00130536	0.00673255	0.00831897
CpG_719	chr16	17209526	-	0.0117569	0.0135468	0.0132614	0.0152452	0.00919589	0.012848	0.014965	0.0120548	0.0180905	0.00946202	0.0154462	0.00744806	0.0128054	0.002	0.0101583	0.0144255	0.0131784	0.0105018	0.0132709	0.0104423	0.00780044	0.0113376	0.00971423	0.0121402	0.0135208	0.0109618	0.0120747	0.00971866	0.00784634	0.00855862	0.0124021	0.00766195	0.0123461	0.0117647	0.132231	0.00954309	0.0139735	0.0154412	0.00982772	0.011311	0.011808	0.00664999	0.00552005	0.00711066	0.00752612	0.0127092
CpG_720	chr16	17209529	-	0.00464499	0.00817641	0.00631424	0.00425341	0.00390371	0.00847274	0.00505542	0.00682405	0.00448522	0.00851648	0.00233577	0.00376014	0.00766747	0.0052459	0.00695444	0.00350936	0.00373832	0.00677168	0.00876095	0.00588992	0.00613999	0.00724799	0.00729127	0.00527584	0.00543774	0.00589565	0.0103776	0.00784096	0.00620747	0.0065511	0.00536095	0.00605421	0.00709558	0.00732018	0.00275103	0.00785569	0.000812489	0.00775126	0.00509861	0.00668168	0.0123811	0.00739435	0.00599497	0.0165336	0.00740774	0.00664323
CpG_721	chr16	17209538	-	0.00364058	0.00272345	0.00352113	0.00111433	0.00260134	0.00454545	0.00116054	0.00183419	0.00244648	0.00329399	0.00786943	0.00316018	0.00522508	0.00130548	0.00431138	0.0025	0.00315956	0.00587717	0.00343589	0.00343117	0.00282151	0.00278211	0.00433271	0.00593297	0.00202259	0.00382278	0.00462404	0.00488062	0.00486791	0.00500477	0.00249043	0.00246151	0.00612348	0.00380667	0.00137363	0.0142111	0.0039386	0.00373621	0.00402351	0.00353976	0.00217717	0.00265852	0.00115852	0.00517873	0.00434744	0.00389681
CpG_722	chr16	22572976	-	0.743114	0.80318	0.808715	0.755259	0.823639	0.784766	0.801452	0.790439	0.832151	0.82217	0.834571	0.759552	0.787969	0.883148	0.854749	0.771176	0.80911	0.789486	0.840811	0.795008	0.776821	0.818219	0.810353	0.796633	0.804698	0.778199	0.803417	0.76914	0.767134	0.767015	0.798135	0.816844	0.806126	0.829207	0.788515	0.733892	0.770148	0.830021	0.808043	0.806984	0.837635	0.864869	0.838432	0.813715	0.783566	0.772013
CpG_723	chr16	22572985	-	0.4558	0.659602	0.640951	0.455433	0.606287	0.549883	0.642232	0.51068	0.685386	0.520134	0.691279	0.493558	0.601417	0.612	0.652568	0.517084	0.624166	0.600643	0.657095	0.585129	0.599281	0.632496	0.595922	0.62476	0.633188	0.487154	0.538988	0.513469	0.471443	0.474291	0.51394	0.61031	0.615493	0.627658	0.293371	0.49229	0.522585	0.661785	0.613318	0.631763	0.68887	0.709074	0.632328	0.600093	0.54149	0.518127
CpG_724	chr16	22572991	-	0.37451	0.501715	0.545484	0.330766	0.517344	0.420868	0.52462	0.384086	0.583978	0.41483	0.615385	0.380467	0.505777	0.459952	0.493562	0.387774	0.522915	0.423911	0.557194	0.478378	0.503881	0.540539	0.516669	0.555212	0.535876	0.381034	0.421489	0.37953	0.349141	0.350705	0.373886	0.493725	0.51929	0.533135	0.27972	0.420932	0.398872	0.539527	0.534015	0.507308	0.583789	0.622514	0.540335	0.465527	0.400681	0.375244
CpG_725	chr16	22573020	-	0.53114	0.616857	0.65643	0.517304	0.588499	0.643259	0.595186	0.586551	0.646245	0.627856	0.647902	0.583511	0.648603	0.626243	0.644697	0.590174	0.611914	0.628695	0.626679	0.595302	0.60641	0.635309	0.610349	0.6626	0.612012	0.536981	0.626778	0.561151	0.539842	0.559449	0.567978	0.632104	0.601619	0.637328	0.688375	0.487986	0.634495	0.63991	0.6077	0.633593	0.668789	0.689033	0.670157	0.616619	0.583337	0.588432
CpG_726	chr16	22573047	-	0.669569	0.73276	0.754411	0.67886	0.7069	0.787784	0.709437	0.718668	0.760128	0.730169	0.72106	0.691382	0.718158	0.791501	0.751183	0.696592	0.718658	0.727397	0.722653	0.71046	0.715561	0.767341	0.722081	0.759289	0.713023	0.693394	0.70814	0.708515	0.665313	0.688865	0.721201	0.731313	0.722138	0.757884	0.728551	0.560606	0.764882	0.759402	0.719806	0.723657	0.749245	0.808774	0.772011	0.733625	0.723768	0.684813
CpG_727	chr16	22573057	-	0.342342	0.425183	0.463306	0.287627	0.405345	0.369422	0.455007	0.322665	0.41048	0.316958	0.502375	0.333662	0.360905	0.480983	0.45608	0.367446	0.389584	0.341691	0.417083	0.384485	0.427173	0.435699	0.357452	0.43006	0.457636	0.313882	0.377242	0.341634	0.33986	0.309118	0.325125	0.389317	0.425446	0.432253	0.590782	0.343477	0.379595	0.458161	0.437915	0.396381	0.487287	0.507573	0.4696	0.434862	0.399213	0.326068
CpG_728	chr16	22573059	-	0.225634	0.329746	0.387814	0.204288	0.327759	0.317282	0.370721	0.284825	0.426644	0.302969	0.418753	0.272244	0.32703	0.304038	0.385537	0.23558	0.356794	0.300482	0.364284	0.325553	0.367017	0.370295	0.340957	0.390747	0.388956	0.279252	0.303129	0.251045	0.253249	0.27024	0.237325	0.366745	0.337558	0.373514	0.442737	0.26512	0.300209	0.385423	0.346018	0.330699	0.38538	0.429793	0.366491	0.390995	0.293591	0.256745
CpG_729	chr16	22573069	-	0.318144	0.34831	0.430985	0.253635	0.3829	0.317442	0.351469	0.352347	0.428955	0.305481	0.380802	0.312068	0.375879	0.450515	0.38024	0.307926	0.443254	0.323912	0.391831	0.371186	0.38125	0.447722	0.398077	0.470036	0.401938	0.278854	0.35361	0.282771	0.262311	0.274325	0.274415	0.363696	0.354247	0.414712	0.321229	0.306317	0.346941	0.41323	0.388799	0.353284	0.477696	0.504239	0.454872	0.386098	0.377855	0.276102
CpG_730	chr16	22573079	-	0.465769	0.597347	0.616268	0.402174	0.581171	0.416279	0.59086	0.403915	0.66129	0.425852	0.666667	0.3939	0.548722	0.528526	0.615945	0.426752	0.589665	0.479508	0.638025	0.528084	0.548847	0.592127	0.545483	0.570932	0.591756	0.390932	0.431477	0.373934	0.384478	0.358928	0.411453	0.566273	0.587106	0.606317	0.243017	0.351464	0.448784	0.630986	0.604629	0.593703	0.664486	0.662201	0.634615	0.462234	0.471452	0.426561
CpG_731	chr16	30308545	-	0.0108814	0.0348078	0.04	0.00413907	0.0299527	0.026393	0.0486216	0.0132032	0.0234792	0.0212314	0.0265184	0.0286411	0.0219922	0.136842	0.0905971	0.0286332	0.0454343	0.0203025	0.0262864	0.052261	0.0317949	0.0405494	0.0368715	0.0408163	0.0117878	0.0256324	0.0315436	0.0112045	0.0074184	0.0222124	0.0171029	0.0423392	0.0386062	0.0407382	NA	0	0.0551302	0.0289796	0.0373708	0.0362266	0.0505415	0.0306807	0.161725	0.00289017	0	0.0202365
CpG_732	chr16	30308579	-	0.00286123	0.00918133	0.0137815	0.00480979	0.000824856	0.00743349	0.0111601	0.00758035	0.00422535	0.000380518	0.0022242	0.01326	0.000344471	0.00546448	0.00806747	0.0065846	0.00443822	0.0072599	0.0127499	0.00329938	0.00582136	0.0104312	0.0111292	0	0.0265902	0.00443498	0.00212993	0.00262533	0.00499015	0.00807217	0.00580993	0.00630876	0.00307898	0.00670766	NA	0	0.0277325	0.00237735	0.00324081	0.00348702	0	0	0.0116788	0	0	0.0104705
CpG_733	chr16	30308631	-	0.00217391	0.00726744	0	0.00735895	0.019392	0.00073046	0.017982	0.00745413	0.00748263	0.0119466	0.0144068	0.0193587	0.0115237	0	0.00615595	0.00321716	0.0141907	0.0083004	0.00500278	0.00887097	0.00306018	0.00454545	0.00389213	0	0.000970874	0.0208748	0.00665779	0.00465658	0.00910881	0.00573192	0.00873811	0.00902987	0.00923615	0.00692521	NA	0	0	0.00448248	0.00920568	0.00945913	0.000893655	0.00095511	0	0	0	0.00677966
CpG_734	chr16	30308633	-	0.00921409	0.00513573	0.00821226	0.00330852	0.00365535	0.00292184	0.00250627	0.013173	0.0117459	0.00423131	0.0237691	0.0109223	0.00705128	0.00526316	0.00821918	0.00429185	0.00890869	0.00711181	0.0134228	0.00403226	0.00613497	0.0110533	0.00556948	0	0.0038835	0.0189937	0.00266312	0.0109277	0.0108508	0.00880282	0.00874036	0.00419972	0.00898652	0.00797503	NA	0	0	0.00567721	0.00554968	0.00921212	0	0.0858779	0	0	0	0.00757576
CpG_735	chr16	30308639	-	0.00433839	0.00652174	0.0132743	0	0	0.00218818	0.00200401	0.00286041	0.00743889	0.00630694	0.00254885	0.00722892	0.00384369	0	0.00820793	0.00107181	0.0084108	0.00394789	0.000556174	0.00669523	0.0023761	0.00714286	0.00166991	0	0.000970874	0.00132626	0.0106596	0.00441347	0.00912454	0.00308099	0.000256542	0.00139018	0.00199154	0.000693001	NA	0	0	0.00729335	0.00630749	0.00799419	0.00178571	0.014313	0	0	0	0.00888192
CpG_736	chr16	30308652	-	0.00108637	0	0.00696643	0.00737101	0.00677789	0.00364697	0.0146022	0.0172414	0.0164981	0.0191489	0.00508475	0.00363636	0.00643501	0	0.00411523	0.00215517	0.00310835	0.00513834	0.00444444	0.00322234	0.00409137	0.0104031	0.00696379	0	0	0.00365085	0.000669344	0.00373308	0.00469716	0.0022007	0.00385109	0.00440938	0.00398605	0.0114583	NA	0	0.00152207	0.0182482	0.0126283	0.00774631	0.00893655	0.00191205	0	0	0	0.00601622
CpG_737	chr16	33382296	-	0.0108273	0.00572139	0.0104889	0.0152313	0.00643087	0.0114096	0.00228592	0.0109394	0.00593575	0.00963662	0.00380132	0.00442828	0.00661778	0.012894	0.00485814	0.00708115	0.00516711	0.00925821	0.00496346	0.00310559	0.00536289	0.00502296	0.00753584	0.00954778	0.0111751	0.0111212	0.0134603	0.0100678	0.00779788	0.00881217	0.00496287	0.00415698	0.00547276	0.00764209	0	0	0.0254522	0.00226831	0.00645807	0.00615875	0.00518656	0.00407899	9.52562e-05	0.00108506	0.00093576	0.00865748
CpG_738	chr16	33382304	-	0.0158181	0.0186199	0.00669036	0.0164305	0.0100791	0.011724	0.0196784	0.014746	0.00805295	0.0109984	0.00597578	0.00427308	0.0110607	0.000940734	0.00460884	0.015443	0.00528169	0.0050351	0.00457384	0.00795684	0.00727273	0.00649417	0.0132224	0.0155198	0.0112173	0.0124704	0.0138507	0.0132286	0.014172	0.0157641	0.00925753	0.00770482	0.0090857	0.00763779	0	0.000931388	0.00458605	0.00592754	0.00818368	0.00711201	0.00668408	0.0131552	0.00257284	0.00374849	0.00721123	0.00914473
CpG_739	chr16	33382331	-	0.0159758	0.0217933	0.0110092	0.0119996	0.0174541	0.0103424	0.00805025	0.0142004	0.0113852	0.0188717	0.00605908	0.00952456	0.0181428	0.0178486	0.00932945	0.017427	0.00865421	0.0122193	0.0109414	0.0143942	0.0107549	0.0121676	0.0185552	0.0198556	0.0152546	0.013582	0.0186987	0.0157853	0.0185482	0.0201399	0.0129929	0.009936	0.0101903	0.0104229	0	0.000626174	0.00782199	0.00938954	0.010768	0.00892626	0.00685475	0.0109614	0.0146876	0.016761	0.00665199	0.0151219
CpG_740	chr16	33382347	-	0.0104641	0.00967502	0.0150448	0.00714286	0.00985717	0.0111507	0.0133685	0.00569456	0.0119626	0.0127668	0.00860542	0.00928403	0.0110517	0.0157293	0.00425614	0.00681721	0.00373709	0.00554236	0.0114609	0.00814003	0.0100721	0.010502	0.00969223	0.0142219	0.0111846	0.010162	0.0111812	0.0110989	0.011171	0.0118074	0.00913672	0.0055821	0.00757735	0.00697398	0	0.000416493	0.00580895	0.00507121	0.00730914	0.00731372	0.00892202	0.00620933	0.00447619	0.000785546	0.000749029	0.00710122
CpG_741	chr16	36990082	+	0.940397	0.870897	0.780778	0.913694	0.806405	0.781977	0.863804	0.92008	0.842451	0.891484	0.811676	0.885482	0.753358	NA	0.829314	0.92276	0.845552	0.849662	0.815707	0.821847	0.854243	0.907407	0.878704	NA	0.856061	0.888713	0.932973	0.882438	0.839801	0.913043	0.866856	0.827048	0.789252	0.855297	NA	NA	NA	0.838583	0.894839	0.894799	1	0.542857	NA	1	0	0.915408
CpG_742	chr16	36990108	+	0.605622	0.726477	0.689765	0.681507	0.696148	0.54717	0.76319	0.690873	0.721346	0.640541	0.710332	0.555157	0.695548	NA	0.664193	0.616617	0.75293	0.646115	0.671908	0.648069	0.708874	0.759259	0.735805	NA	0.836502	0.652954	0.717838	0.723837	0.625498	0.488294	0.625176	0.696695	0.702845	0.773779	NA	NA	NA	0.732283	0.793037	0.735936	1	0.542857	NA	0	0	0.633929
CpG_743	chr16	36990130	+	0.750302	0.75	0.843566	0.797714	0.875536	0.713455	0.791769	0.787819	0.844292	0.757268	0.827937	0.674607	0.844765	NA	0.830855	0.7999	0.829173	0.801611	0.842078	0.823798	0.836654	0.961298	0.863619	NA	1	0.80759	0.832698	0.774854	0.791457	0.760684	0.739038	0.847408	0.799576	0.883117	NA	NA	NA	0.810945	0.904878	0.875435	1	0.542857	NA	1	0.988166	0.738892
CpG_744	chr16	36990150	+	0.41432	0.651316	0.689802	0.622286	0.73099	0.539579	0.752457	0.605419	0.759874	0.516633	0.635523	0.505164	0.688554	NA	0.675023	0.525176	0.72434	0.557676	0.671233	0.670832	0.67763	0.702669	0.711647	NA	0.788168	0.660272	0.612256	0.582057	0.588206	0.431472	0.515708	0.692559	0.604034	0.782552	NA	NA	NA	0.705649	0.712276	0.680716	1	0.546763	NA	0	0	0.583706
CpG_745	chr16	36990183	+	0.529364	0.776316	0.735829	0.688712	0.792857	0.599709	0.790898	0.668639	0.82563	0.639456	0.76525	0.640541	0.756627	NA	0.731203	0.674395	0.830709	0.624365	0.777077	0.787317	0.759791	0.912609	0.810633	NA	0.847909	0.725781	0.765795	0.623358	0.682412	0.518519	0.61669	0.807441	0.753977	0.847938	NA	NA	NA	0.783465	0.792802	0.776755	0.966667	0.542857	NA	0	1	0.703187
CpG_746	chr16	36990192	+	0.662641	0.820569	0.82851	0.756571	0.860231	0.735766	0.828996	0.743818	0.870526	0.662585	0.855288	0.68638	0.802647	NA	0.810761	0.826962	0.815505	0.772034	0.843652	0.797332	0.818561	0.877323	0.860547	NA	0.908397	0.822657	0.80456	0.727802	0.796813	0.72973	0.707248	0.872327	0.765576	0.865285	NA	NA	NA	0.94664	0.881783	0.867512	0.933333	0.542857	NA	0	1	0.746032
CpG_747	chr16	44812860	-	0.759358	0.898305	0.871508	0.710526	0.896825	0.79562	0.844037	0.709459	0.780822	0.712121	0.905882	0.829412	0.934783	1	0.963964	0.69697	0.835294	0.817844	0.949749	0.796016	0.790974	0.877769	0.869927	1	0.798795	0.844407	0.786953	0.840894	0.830344	0.755745	0.829027	0.851568	0.847734	0.913441	NA	1	0.916667	0.833333	0.836664	0.858176	0.896923	0.772222	1	0.93038	0.931034	0.851769
CpG_748	chr16	44812941	-	0.867725	0.983193	0.912088	0.815789	0.929688	0.935252	0.763636	0.899329	0.797386	0.934783	0.844444	0.896341	0.820144	1	1	0.946429	0.952381	0.955556	0.921569	0.870916	0.908228	0.872907	0.885774	0.911917	0.866906	0.907795	0.847039	0.849604	0.842772	0.868533	0.865491	0.899931	0.884099	0.888889	NA	0	0.750611	0.921951	0.913971	0.875208	0.884615	0.775	1	0.863924	1	0.849721
CpG_749	chr16	44825757	+	0.8347	0.896467	0.863151	0.81	0.862957	0.853786	0.889539	0.892449	0.872126	0.883095	0.837186	0.831522	0.884962	0.913428	0.905255	0.831585	0.910851	0.866232	0.889235	0.856503	0.850682	0.831102	0.82829	0.898086	0.839046	0.857017	0.835671	0.850692	0.848887	0.843036	0.852558	0.86654	0.876109	0.877561	1	0.77931	0.861548	0.900128	0.875797	0.863058	0.902544	0.821918	0.854204	0.821198	0.852024	0.859828
CpG_750	chr16	44825774	+	0.94827	0.954564	0.924147	0.931422	0.970441	0.940044	0.957017	0.959782	0.939372	0.965121	0.94264	0.935318	0.959582	0.936114	0.9263	0.937792	0.947624	0.933636	0.973454	0.928968	0.923819	0.946653	0.948398	0.958749	0.948865	0.938925	0.923569	0.943667	0.918802	0.941266	0.946295	0.95334	0.941111	0.936116	0.602649	1	0.943113	0.945931	0.946892	0.956736	0.947364	0.907924	0.999545	0.897986	0.92154	0.95445
CpG_751	chr16	44825788	+	0.939892	0.974127	0.951135	0.92904	0.920464	0.940487	0.963112	0.950941	0.974525	0.970588	0.943775	0.931609	0.965374	0.998233	0.948519	0.960567	0.959033	0.9585	0.932752	0.953416	0.934255	0.951762	0.95191	0.946732	0.93303	0.941467	0.952995	0.948107	0.954328	0.943674	0.96186	0.941613	0.957096	0.93418	0.99359	0.966175	0.925458	0.941945	0.94542	0.935867	0.950883	0.960824	0.943075	0.961438	0.960866	0.944649
CpG_752	chr16	44825805	+	0.954918	0.984388	0.979252	0.964933	0.98588	0.975599	0.971816	0.988851	0.969142	0.974801	0.975904	0.978904	0.99238	0.990291	0.952151	0.974414	0.970483	0.978739	0.960149	0.973968	0.969919	0.961512	0.967712	0.998441	0.972925	0.965702	0.964312	0.971979	0.965776	0.965068	0.96822	0.969501	0.968858	0.957581	0.987261	0.998274	0.88728	0.975878	0.969803	0.968498	0.970633	0.950195	0.917784	0.982097	0.98313	0.975522
CpG_753	chr16	44825833	+	0.959621	0.906173	0.913455	0.936055	0.912573	0.903226	0.94652	0.93589	0.953372	0.911913	0.913741	0.921394	0.921691	0.904425	0.953402	0.928527	0.917773	0.924121	0.905802	0.925768	0.901061	0.948628	0.921294	0.929464	0.947524	0.935342	0.921981	0.926499	0.920245	0.933861	0.938448	0.936336	0.9273	0.918364	0.405063	0.875217	0.86907	0.941604	0.924509	0.941367	0.916801	0.896949	0.935426	0.943723	0.944144	0.938307
CpG_754	chr16	72678613	+	0.53932	0.632363	0.569676	0.59698	0.500585	0.497192	0.542441	0.535151	0.602273	0.638074	0.568234	0.515136	0.518116	0.296636	0.548318	0.496089	0.607089	0.524211	0.626342	0.568199	0.488468	0.545019	0.598458	0.514135	0.537229	0.489631	0.53349	0.553434	0.5211	0.543041	0.530763	0.599236	0.558485	0.565524	0.70438	0.465116	0.424789	0.557838	0.57428	0.600968	0.554574	0.567624	0.463636	0.519145	0.449108	0.524612
CpG_755	chr16	72678622	+	0.677485	0.725921	0.647419	0.754936	0.641476	0.69954	0.615578	0.697318	0.726755	0.747178	0.699231	0.643156	0.689904	0.748466	0.676681	0.656855	0.718064	0.659651	0.700286	0.665461	0.601878	0.664655	0.693831	0.625164	0.655515	0.627177	0.686263	0.70762	0.664472	0.66738	0.677729	0.706302	0.682924	0.649684	0.99635	0.821705	0.792544	0.670386	0.698072	0.703133	0.681705	0.557193	0.58843	0.668159	0.664793	0.667326
CpG_756	chr16	72678627	+	0.536821	0.565156	0.551709	0.553415	0.508792	0.542624	0.537645	0.57799	0.622236	0.618223	0.57121	0.506005	0.489183	0.376147	0.566213	0.53763	0.638714	0.553874	0.613457	0.574484	0.469561	0.528209	0.564197	0.613995	0.51927	0.508951	0.546694	0.556171	0.521192	0.496023	0.533346	0.596629	0.536003	0.539346	1	0.503876	0.431149	0.537201	0.555659	0.583302	0.56753	0.443042	0.419008	0.404774	0.417521	0.542022
CpG_757	chr16	72678647	+	0.697248	0.720399	0.62186	0.704851	0.629924	0.667696	0.576485	0.723558	0.75626	0.681302	0.704572	0.613141	0.669382	0.744222	0.673749	0.593697	0.72342	0.659928	0.684693	0.649135	0.603162	0.63364	0.639141	0.700301	0.579148	0.584744	0.654116	0.69244	0.632941	0.608862	0.670014	0.673186	0.662076	0.639337	0.998134	0.816	0.714767	0.66489	0.666313	0.677605	0.663376	0.614327	0.54097	0.563733	0.563982	0.647426
CpG_758	chr16	72678655	+	0.318729	0.422776	0.332748	0.378291	0.468593	0.424095	0.36563	0.375962	0.462342	0.390861	0.457099	0.369497	0.404949	0.166922	0.36452	0.378136	0.440604	0.395742	0.458102	0.388587	0.326986	0.357549	0.405892	0.417625	0.366527	0.330723	0.344184	0.395599	0.355124	0.315738	0.365521	0.42408	0.390231	0.39426	0.439114	0.81746	0.402502	0.422187	0.419832	0.428866	0.362066	0.403974	0.326369	0.280817	0.275845	0.398214
CpG_759	chr16	72678696	+	0.660732	0.720996	0.70645	0.694688	0.639719	0.716334	0.659799	0.71929	0.758075	0.644697	0.729502	0.66719	0.701511	0.966258	0.714493	0.647125	0.679916	0.710542	0.712903	0.663338	0.592533	0.646016	0.646232	0.60639	0.640737	0.643528	0.672399	0.702894	0.658986	0.658646	0.680906	0.72075	0.67953	0.676773	1	1	0.708609	0.668091	0.661349	0.678809	0.667289	0.615331	0.717481	0.572142	0.648541	0.686039
CpG_760	chr16	87766084	-	0.836923	0.681514	0.705517	0.768008	0.624676	0.775	0.676558	0.826395	0.686152	0.800206	0.610459	0.773873	0.704114	0.809524	0.696677	0.78275	0.666161	0.786278	0.637584	0.678852	0.652363	0.676099	0.682671	0.628017	0.644712	0.771375	0.779475	0.772271	0.773023	0.756891	0.766889	0.605501	0.626184	0.633719	0.634921	0.774775	0.716948	0.634674	0.631559	0.636304	0.63829	0.631259	0.613575	0.728674	0.819878	0.771075
CpG_761	chr16	87766091	-	0.698876	0.548634	0.545594	0.620227	0.503753	0.700197	0.540972	0.716768	0.5985	0.617737	0.555438	0.626217	0.522411	0.688372	0.581276	0.647096	0.51233	0.655205	0.474536	0.545347	0.531309	0.546311	0.543455	0.558921	0.529757	0.666886	0.638481	0.656413	0.669933	0.657652	0.660137	0.459051	0.489289	0.512849	1	0.590717	0.604825	0.487556	0.514922	0.495417	0.516334	0.521339	0.577679	0.645833	0.748843	0.633535
CpG_762	chr16	87766165	-	0.173943	0.172553	0.188235	0.194058	0.140637	0.15493	0.151163	0.187837	0.180163	0.157283	0.162239	0.177097	0.197425	0.138211	0.124067	0.175407	0.14066	0.135922	0.16122	0.169228	0.200189	0.177417	0.164059	0.14334	0.150154	0.189915	0.178014	0.183851	0.190072	0.191241	0.180003	0.117772	0.157545	0.134016	0.323529	0.144531	0.169504	0.141324	0.144604	0.135727	0.134619	0.175869	0.1176	0.135383	0.170883	0.148642
CpG_763	chr16	90087384	-	0.620966	0.823936	0.797023	0.661131	0.820016	0.703068	0.792161	0.610753	0.812939	0.665284	0.785065	0.670025	0.780293	0.723095	0.793191	0.66437	0.804917	0.691444	0.819669	0.832511	0.823483	0.848679	0.825905	0.822859	0.853113	0.730938	0.736521	0.662757	0.692228	0.743889	0.654421	0.829469	0.813252	0.83908	0.553672	0.772851	0.743824	0.803187	0.813879	0.805747	0.814658	0.809092	0.809656	0.712599	0.725862	0.710524
CpG_764	chr16	90087476	-	0.691906	0.888889	0.862967	0.69792	0.896827	0.738926	0.874018	0.648565	0.840805	0.676275	0.864412	0.706248	0.804105	0.812069	0.870111	0.714754	0.863596	0.733687	0.897015	0.883911	0.888527	0.907535	0.893289	0.893394	0.9195	0.754816	0.80419	0.697248	0.732699	0.779595	0.689206	0.891595	0.880565	0.89881	0.552113	0.877634	0.761913	0.850114	0.866477	0.863808	0.893873	0.922464	0.91504	0.764673	0.802868	0.745995
CpG_765	chr16	90087480	-	0.721963	0.894971	0.887918	0.7691	0.885988	0.799014	0.876515	0.720792	0.889113	0.755866	0.89067	0.759324	0.878519	0.864865	0.856631	0.769733	0.897737	0.829543	0.911423	0.886465	0.880005	0.900037	0.906321	0.928176	0.917081	0.814217	0.851431	0.780959	0.793185	0.826868	0.76356	0.904732	0.899818	0.906394	0.735955	0.938859	0.807237	0.867059	0.886269	0.88188	0.919322	0.924363	0.958687	0.821305	0.804182	0.803025
CpG_766	chr16	90087486	-	0.619167	0.757099	0.767357	0.634966	0.79056	0.655245	0.778815	0.543365	0.754522	0.596963	0.771924	0.623725	0.726719	0.754891	0.782171	0.624966	0.765615	0.647476	0.786557	0.786652	0.790227	0.805911	0.788634	0.820162	0.80739	0.680317	0.732525	0.635805	0.642524	0.707977	0.6117	0.791039	0.765881	0.774593	0.464789	0.77522	0.653299	0.747107	0.755745	0.778267	0.776552	0.787674	0.75809	0.690207	0.690826	0.662947
CpG_767	chr16	92455209	+	0.878071	0.896338	0.89638	0.86292	0.860799	0.857612	0.880032	0.860686	0.874593	0.883149	0.900966	0.878219	0.879022	0.851549	0.88527	0.881372	0.86761	0.858137	0.877336	0.903288	0.89311	0.908405	0.904961	0.911487	0.910577	0.886286	0.877258	0.864003	0.859016	0.886708	0.882302	0.87239	0.889315	0.893991	0.761468	0.900046	0.867908	0.874995	0.887909	0.889498	0.872198	0.867556	0.925153	0.832023	0.886541	0.853592
CpG_768	chr16	92455244	+	0.89602	0.929379	0.92063	0.922551	0.897713	0.916716	0.91607	0.907342	0.918232	0.899404	0.918959	0.928103	0.912116	0.944859	0.927565	0.903932	0.922432	0.915269	0.912157	0.922792	0.921566	0.928161	0.925594	0.940008	0.927417	0.919189	0.905012	0.907383	0.908653	0.908385	0.908468	0.916675	0.918821	0.93044	1	0.907956	0.905202	0.936496	0.923465	0.931128	0.925684	0.943204	0.909253	0.930225	0.909474	0.918369
CpG_769	chr16	92455252	+	0.826767	0.835103	0.854576	0.834008	0.831092	0.841951	0.866852	0.819724	0.855167	0.847378	0.857249	0.83424	0.844642	0.830484	0.888209	0.835347	0.862522	0.852443	0.846341	0.855731	0.874753	0.876787	0.864471	0.852133	0.875273	0.86021	0.85003	0.838507	0.842832	0.847191	0.83953	0.848744	0.858381	0.876773	0.761468	0.880666	0.841963	0.846235	0.847592	0.854327	0.847522	0.855064	0.85287	0.820327	0.858234	0.835054
CpG_770	chr16	92455305	+	0.927832	0.946132	0.92897	0.943875	0.948651	0.950431	0.938714	0.937308	0.938503	0.957465	0.94728	0.930684	0.934727	0.887379	0.932646	0.938594	0.950052	0.92828	0.94261	0.947731	0.938525	0.940846	0.936442	0.955854	0.953071	0.938752	0.949045	0.93452	0.944755	0.942413	0.949973	0.933544	0.945074	0.950219	0.75576	0.926048	0.954954	0.943653	0.945121	0.947618	0.948125	0.954561	0.952695	0.930525	0.930397	0.942153
CpG_771	chr16	92455330	+	0.92537	0.933649	0.927291	0.923433	0.932386	0.954336	0.9446	0.923106	0.94287	0.938765	0.937757	0.948184	0.943105	0.960672	0.943587	0.929853	0.94557	0.912126	0.926831	0.946738	0.942968	0.926706	0.947197	0.940093	0.954316	0.929957	0.941437	0.927648	0.941575	0.93669	0.929766	0.940641	0.929371	0.933022	0.619266	0.918567	0.936307	0.943191	0.943302	0.936245	0.939601	0.940843	0.923803	0.91327	0.941819	0.935008
CpG_772	chr16	95861227	-	0.693803	0.744638	0.786339	0.691819	0.757377	0.726146	0.698068	0.721287	0.749533	0.709423	0.80254	0.689667	0.707261	0.777681	0.759735	0.726264	0.729031	0.696912	0.752537	0.735425	0.75025	0.766389	0.754252	0.782564	0.772027	0.739045	0.711541	0.703327	0.714007	0.743767	0.706616	0.746103	0.761954	0.755261	0.454976	0.819595	0.703287	0.754336	0.765096	0.76261	0.777686	0.73012	0.747261	0.764336	0.68357	0.690663
CpG_773	chr16	95861262	-	0.693621	0.801474	0.773449	0.682563	0.784203	0.72718	0.766108	0.709666	0.788346	0.696178	0.807052	0.67359	0.757485	0.780477	0.747053	0.713131	0.759058	0.697797	0.770855	0.735478	0.747724	0.75412	0.762754	0.764439	0.773688	0.717689	0.723717	0.708104	0.693862	0.70931	0.697088	0.735309	0.753912	0.75538	0.453682	0.73198	0.671265	0.771863	0.764965	0.772882	0.774202	0.774086	0.769941	0.715645	0.698844	0.672581
CpG_774	chr16	95861329	-	0.583154	0.735802	0.791449	0.662584	0.72494	0.749187	0.751279	0.683614	0.762215	0.648166	0.81498	0.633844	0.738887	0.715745	0.736414	0.658478	0.739378	0.694933	0.747221	0.723773	0.747545	0.740532	0.717186	0.729742	0.741511	0.703319	0.690078	0.664931	0.678849	0.682967	0.668337	0.679365	0.741063	0.756722	0.454976	0.697973	0.684794	0.759861	0.731626	0.73807	0.757158	0.728884	0.766687	0.712546	0.6554	0.642736
CpG_775	chr17	5401513	-	0.776058	0.660566	0.600492	0.825036	0.524985	0.756374	0.519733	0.855814	0.596774	0.837066	0.662957	NA	NA	NA	NA	NA	NA	NA	NA	0.585434	0.599776	0.664642	0.635338	0.779471	0.693749	0.817991	0.801552	0.82005	0.821463	0.81758	0.826742	NA	NA	NA	NA	NA	1	NA	NA	NA	NA	NA	NA	NA	NA	NA
CpG_776	chr17	5401532	-	0.934237	0.693548	0.701681	0.85893	0.616034	0.876569	0.618112	0.884396	0.667859	0.89977	0.733858	NA	NA	NA	NA	NA	NA	NA	NA	0.669174	0.687883	0.744078	0.726623	0.891677	0.854706	0.914098	0.903797	0.927433	0.90227	0.913743	0.902352	NA	NA	NA	NA	NA	1	NA	NA	NA	NA	NA	NA	NA	NA	NA
CpG_777	chr17	5401563	-	0.876908	0.665319	0.622149	0.869279	0.569837	0.775581	0.558463	0.882587	0.6494	0.871078	0.683673	NA	NA	NA	NA	NA	NA	NA	NA	0.617853	0.649103	0.698773	0.670378	0.788119	0.736136	0.882758	0.872021	0.893277	0.891406	0.871253	0.875574	1	1	NA	NA	NA	0	NA	NA	NA	NA	NA	NA	NA	NA	NA
CpG_778	chr17	5401587	-	0.931705	0.76129	0.744298	0.880442	0.654841	0.897222	0.636166	0.898921	0.726578	0.916226	0.758431	NA	NA	NA	NA	NA	NA	NA	NA	0.745349	0.762194	0.777972	0.766147	0.916699	0.867053	0.919562	0.900145	0.927205	0.920811	0.920951	0.908976	NA	NA	NA	NA	NA	1	NA	NA	NA	NA	NA	NA	NA	NA	NA
CpG_779	chr17	5401598	-	0.855506	0.720387	0.701618	0.886128	0.676701	0.912111	0.592916	0.870307	0.72556	0.884615	0.664577	NA	NA	NA	NA	NA	NA	NA	NA	0.710518	0.727306	0.761863	0.745698	0.862475	0.839732	0.909394	0.884511	0.9293	0.919485	0.915777	0.88291	NA	NA	NA	NA	NA	1	NA	NA	NA	NA	NA	NA	NA	NA	NA
CpG_780	chr17	5401613	-	0.703538	0.557615	0.548232	0.755003	0.506924	0.689751	0.505441	0.689831	0.575064	0.733986	0.596711	NA	NA	NA	NA	NA	NA	NA	NA	0.520058	0.538786	0.629223	0.577258	0.734381	0.72189	0.777214	0.761438	0.754115	0.742634	0.751899	0.733805	NA	NA	NA	NA	NA	1	NA	NA	NA	NA	NA	NA	NA	NA	NA
CpG_781	chr17	7158243	+	0.855895	0.916084	0.818565	0.852941	0.86	0.850746	0.778723	0.853556	0.783251	0.820225	0.794118	0.85567	0.908213	0.697674	0.818182	0.880208	0.848249	0.852941	0.876923	0.753927	0.756672	0.845982	0.796733	0.657718	0.845938	0.770686	0.869096	0.751263	0.823899	0.811141	0.841163	0.809524	0.870185	0.821251	0	1	0.585586	0.849271	0.825688	0.833572	0.849765	0.852853	0.816239	0.886792	0.625	0.837995
CpG_782	chr17	7158265	+	0.689278	0.824561	0.775424	0.7	0.846154	0.838308	0.65368	0.632231	0.612903	0.691011	0.874539	0.684755	0.629808	0.637427	0.62807	0.683246	0.758285	0.58351	0.707692	0.694663	0.632621	0.734498	0.663942	0.666667	0.717514	0.623886	0.713415	0.613824	0.645873	0.724185	0.717013	0.678663	0.744436	0.706733	1	0.617284	0.581818	0.688672	0.721377	0.742589	0.731707	0.643399	0.381466	0.496855	0.497278	0.622509
CpG_783	chr17	7158290	+	0.75	0.85	0.779193	0.759644	0.859532	0.845387	0.887446	0.665979	0.818408	0.747191	0.805147	0.819121	0.751208	0.760234	0.79021	0.692708	0.860784	0.827368	0.796915	0.739283	0.754717	0.844519	0.762035	0.746637	0.830748	0.736062	0.725237	0.728653	0.728931	0.685811	0.730704	0.751706	0.842672	0.806371	1	1	0.276018	0.820408	0.779093	0.783141	0.831373	0.843609	0.496774	0.949527	0.66333	0.785129
CpG_784	chr17	12507933	+	0.275941	0.316199	0.296074	0.272025	0.30306	0.286136	0.264195	0.242786	0.319079	0.257641	0.317982	0.281282	0.329183	0.248733	0.345335	0.320368	0.322561	0.27854	0.322467	0.30706	0.314797	0.317669	0.332069	0.303418	0.298799	0.283516	0.250087	0.235042	0.211534	0.253102	0.240254	0.304732	0.34166	0.328429	0.343188	0.264614	0.299479	0.341949	0.353931	0.323244	0.3457	0.336918	0.34749	0.28189	0.278637	0.256269
CpG_785	chr17	12507948	+	0.168944	0.168352	0.166189	0.182824	0.197984	0.196354	0.123012	0.157037	0.209161	0.186943	0.184756	0.173707	0.227197	0.157926	0.217225	0.1945	0.19786	0.200399	0.196139	0.177138	0.195759	0.199943	0.197784	0.205755	0.180934	0.17817	0.159203	0.15998	0.115128	0.15943	0.151842	0.172873	0.232685	0.205022	0.256145	0.198459	0.174942	0.224672	0.215758	0.185267	0.223317	0.219372	0.28233	0.198599	0.19501	0.156847
CpG_786	chr17	12507958	+	0.147092	0.147787	0.110973	0.102944	0.130389	0.0987633	0.0949787	0.0965772	0.12326	0.104325	0.159753	0.133009	0.164384	0.104384	0.153438	0.149651	0.147265	0.121464	0.163927	0.138365	0.14708	0.133719	0.156452	0.111899	0.120849	0.124591	0.106914	0.102762	0.0870857	0.103154	0.103432	0.129987	0.160615	0.15693	0.122265	0.155859	0.13006	0.14657	0.160475	0.134134	0.174581	0.160328	0.207185	0.113223	0.169226	0.131183
CpG_787	chr17	12508102	-	0.243137	0.273421	0.320911	0.202723	0.314477	0.242018	0.339758	0.243384	0.277406	0.215022	0.344559	0.211377	0.291626	0.219763	0.318425	0.291306	0.339636	0.287173	0.382104	0.311871	0.356452	0.346358	0.341841	0.380961	0.341648	0.270834	0.247553	0.204434	0.223421	0.226962	0.207074	0.361545	0.398275	0.347305	0.1925	0.437366	0.320638	0.355575	0.417776	0.348195	0.377893	0.381714	0.432808	0.308475	0.352137	0.251378
CpG_788	chr17	12508104	-	0.29526	0.327242	0.375744	0.250904	0.365111	0.273743	0.389498	0.289455	0.31202	0.262752	0.366209	0.281181	0.3737	0.299905	0.358509	0.308935	0.408307	0.299924	0.418622	0.343486	0.369974	0.383519	0.379475	0.429401	0.390229	0.30294	0.309234	0.250164	0.224285	0.259423	0.220958	0.407637	0.43157	0.419765	0.111111	0.410369	0.324059	0.358207	0.461671	0.38967	0.417483	0.438395	0.469833	0.381573	0.385546	0.30598
CpG_789	chr17	12508115	-	0.204139	0.229286	0.289712	0.191186	0.263365	0.189839	0.247644	0.210412	0.24725	0.221185	0.284202	0.157673	0.257457	0.267104	0.262631	0.248118	0.305164	0.244074	0.336347	0.262509	0.298525	0.319163	0.305017	0.339799	0.317232	0.228768	0.216881	0.167163	0.161778	0.193657	0.162529	0.306646	0.345562	0.306722	0.105263	0.220557	0.236808	0.295084	0.368897	0.307204	0.324999	0.345739	0.382969	0.237937	0.310842	0.213778
CpG_790	chr17	12508136	-	0.234037	0.265966	0.294962	0.185856	0.271459	0.218704	0.282475	0.201173	0.224928	0.195735	0.309324	0.198659	0.285378	0.297521	0.272207	0.284234	0.311986	0.272823	0.322029	0.245323	0.291636	0.301182	0.279615	0.298769	0.297252	0.22749	0.205156	0.192904	0.172811	0.195777	0.183715	0.306861	0.328748	0.291278	0.173317	0.25828	0.249164	0.307297	0.350335	0.301124	0.321371	0.34597	0.383107	0.28352	0.28836	0.213184
CpG_791	chr17	12508147	-	0.257608	0.31244	0.336564	0.252324	0.310758	0.259807	0.298034	0.236788	0.280019	0.269575	0.362903	0.227771	0.315404	0.308663	0.325802	0.335501	0.349148	0.285714	0.356212	0.307605	0.333024	0.335864	0.348765	0.380163	0.338978	0.274529	0.279434	0.230898	0.227109	0.2392	0.231262	0.340943	0.398586	0.342766	0.370787	0.33626	0.304949	0.34636	0.377737	0.334011	0.386985	0.368549	0.408536	0.320242	0.358029	0.273754
CpG_792	chr17	12508167	-	0.200686	0.219472	0.261977	0.232685	0.242905	0.233988	0.23451	0.205819	0.232394	0.21514	0.248888	0.220916	0.260463	0.217729	0.277684	0.271289	0.266761	0.210013	0.314667	0.217363	0.28493	0.276914	0.268797	0.259207	0.273265	0.240347	0.224492	0.203381	0.184537	0.201514	0.191895	0.261993	0.316927	0.278171	0.375622	0.328498	0.265352	0.273708	0.328501	0.280018	0.297741	0.296035	0.371805	0.267585	0.273823	0.233868
CpG_793	chr17	15527099	-	0	0	0	0.00716846	0	0.0534351	0	0	0	0	0	0.00311526	0.00573066	NA	0	0.010989	0	0.022409	0	0.00157233	0.00194553	0.0218978	0	0	0	0	0	0.00649351	0	0	0	0.00997151	0	0.00879121	NA	NA	NA	0	0.00165563	0.00131062	0	0	NA	0	0	0.0116279
CpG_794	chr17	15527103	-	0	0	0	0	0	0	0	0.00334448	0	0	0	0	0	NA	0.0170213	0	0	0	0	0.0189873	0	0	0	0	0	0	0	0.0015528	0.00426136	0.0179775	0	0	0	0.0175055	NA	NA	NA	0	0	0.00509554	0	0	NA	0	0.0123457	0.00689655
CpG_795	chr17	15527107	-	0	0	0.00470588	0.0250896	0	0	0	0	0	0	0	0	0	NA	0	0	0	0	0.00289017	0	0	0	0	0	0	0.0238095	0	0.00625	0.00426136	0	0	0.010043	0.00581395	0	NA	NA	NA	0.0132159	0.00657895	0.00637755	0	0	NA	0	0	0
CpG_796	chr17	15527111	-	0	0.0116732	0	0.0251799	0	0.034749	0	0	0	0	0.0413793	0	0	NA	0	0	0.0142857	0	0	0.00630915	0	0.014652	0.00723589	0	0	0	0.0259366	0.0110236	0	0	0	0	0	0	NA	NA	NA	0	0	0.00510204	0	0	NA	0	0	0
CpG_797	chr17	15527116	-	0	0	0.00236407	0.00359712	0	0.0155039	0	0.00341297	0	0	0	0	0	NA	0.0297872	0.0140845	0	0	0	0	0	0	0.00145349	0	0	0	0	0.0126382	0.00722543	0	0.0109375	0	0	0	NA	NA	NA	0	0.00679117	0	0	0	NA	0	0	0
CpG_798	chr17	15527118	-	0.0026738	0	0	0	0	0	0	0	0	0.03125	0	0.00303951	0.0254237	NA	0.0340426	0.010989	0	0	0	0	0	0	0	0	0	0	0.0403458	0.0109546	0.0182841	0.00232019	0.00931677	0.0070922	0	0	NA	NA	NA	0.0241758	0	0	0	0	NA	0	0	0
CpG_799	chr17	15527124	-	0.00266667	0	0.0163551	0	0	0.0268199	0	0	0	0	0	0	0	NA	0	0	0.0140845	0.00557103	0	0	0	0	0.001443	0	0	0.0108225	0	0.021875	0	0.00225734	0	0.00988701	0	0.013245	NA	NA	NA	0	0	0.00635324	0.00363636	0	NA	0	0	0
CpG_800	chr17	15527130	-	0.0263889	0	0.00116144	0	0	0.0117878	0.0292793	0.00167504	0	0.0179372	0	0	0.00566572	NA	0	0.0164609	0	0.0114778	0	0	0	0.0018797	0.000724113	0	0	0	0.0376812	0.0117647	0.0141443	0.0192308	0.0015625	0.002849	0	0.00110011	NA	NA	NA	0.018931	0.00660066	0.00896287	0	0	NA	0	0	0.000577367
CpG_801	chr17	15527135	-	0	0	0.0173812	0	0.0112994	0	0	0.0267559	0	0	0	0	0	NA	0	0.00547196	0	0	0	0	0.00191205	0	0.000730994	0	0	0.00650759	0.001443	0	0.00844476	0	0	0	0.0087146	0	NA	NA	NA	0	0	0	0.00181818	0	NA	0	0	0
CpG_802	chr17	15527142	-	0	0	0	0	0	0.00578035	0.013544	0.0188034	0	0	0.0277778	0.0182648	0.029872	NA	0	0.0109589	0.0143678	0.00561798	0.00144509	0.013302	0	0	0.0130624	0	0.00488998	0.0369967	0.0377907	0.00156372	0.00707714	0.00113379	0.00312744	0.00436364	0.0116874	0.0154525	NA	NA	NA	0	0.0033195	0.001287	0	0.0714286	NA	0	0	0.0201962
CpG_803	chr17	15527151	-	0	0.00196464	0	0.0107914	0	0	0	0	0	0	0	0	0.00283286	NA	0.00856531	0.00274725	0	0.0196629	0.015919	0	0.000961538	0	0	0	0	0.00327511	0	0	0.000714796	0	0.00629426	0.0100937	0.0164794	0	NA	NA	NA	0.00443459	0.00166528	0.0156556	0	0	NA	0	0.00625	0
CpG_804	chr17	15527166	-	0	0	0	0.0279851	0.0116054	0	0	0	0	0	0	0	0.00146199	NA	0.0175824	0	0.00584795	0	0	0.0107438	0	0	0.0109546	0	0	0	0.0125392	0	0.0180316	0	0	0	0.000787402	0	NA	NA	NA	0.011976	0.0080573	0.00552868	0	0	NA	0	0	0
CpG_805	chr17	15527168	-	0	0	0	0	0	0	0	0	0.00203252	0.00226244	0	0.0368098	0	NA	0	0	0	0	0.00583942	0	0	0	0.000734214	0	0	0.00109769	0	0.00634921	0.00502152	0.0160735	0.0063593	0	0.00668151	0	NA	NA	NA	0.013468	0.00587741	0.00650618	0	0	NA	0	0	0.0117096
CpG_806	chr17	15527173	-	0	0	0	0	0.0019305	0	0	0	0	0.0046729	0.0035461	0	0.00145985	NA	0	0	0.00146413	0.0217077	0	0	0	0	0	0	0	0	0.0015015	0	0.0014556	0	0	0.0112191	0	0	NA	NA	NA	0	0	0.00331126	0	0	NA	0	0	0.00364078
CpG_807	chr17	15527177	-	0	0	0	0.00359712	0.00377358	0	0.018018	0.0265781	0.00395257	0	0	0	0	NA	0	0	0	0	0	0.00780031	0.00191571	0	0.0114943	0	0	0	0	0	0	0	0.00154799	0	0.00435414	0	NA	NA	NA	0	0.0165837	0	0	0	NA	0	0	0.00229885
CpG_808	chr17	15527201	-	0	0	0	0	0	0	0	0	0	0	0	0	0	NA	0	0	0.00857143	0	0.00576369	0.01875	0.00191939	0	0	0	0	0.00649351	0	0.0015528	0	0	0	0	0.0247093	0	NA	NA	NA	0	0	0	0	0	NA	0	0	0
CpG_809	chr17	15527206	-	0.00266667	0	0	0.0250896	0	0	0.0540541	0.0167224	0	0	0.0555556	0.0121212	0.0112994	NA	0	0.00273973	0	0	0	0.00156006	0	0	0.00875912	0	0	0	0	0.0201863	0	0.0179775	0	0	0	0	NA	NA	NA	0.0109649	0.00657895	0	0	0	NA	0	0	0
CpG_810	chr17	29326177	+	0.711068	0.775215	0.738389	0.690793	0.727782	0.665527	0.765424	0.628777	0.753258	0.669301	0.741422	0.623752	0.717986	0.702703	0.697828	0.668279	0.746637	0.692424	0.76772	0.728749	0.738604	0.737437	0.741353	0.485944	0.797859	0.660524	0.61182	0.639638	0.638719	0.67975	0.634334	0.757563	0.712919	0.650987	NA	NA	1	0.666839	0.765105	0.770744	0.716249	0.774421	1	0.453061	0.559223	0.6488
CpG_811	chr17	29326193	+	0.881599	0.900172	0.910503	0.906333	0.906704	0.902564	0.931763	0.853779	0.926458	0.880928	0.882873	0.904691	0.908939	1	0.910003	0.909369	0.91471	0.887382	0.92963	0.901714	0.863126	0.895331	0.900962	0.5	0.894969	0.874927	0.883394	0.891456	0.882005	0.90496	0.862517	0.904319	0.891976	0.872666	NA	NA	1	0.912539	0.902239	0.9186	0.90799	0.856137	1	1	0.871845	0.888323
CpG_812	chr17	29326202	+	0.77944	0.865908	0.836162	0.790456	0.830107	0.80814	0.888371	0.816109	0.834255	0.794643	0.780885	0.846077	0.885912	1	0.814991	0.826109	0.847774	0.817258	0.873861	0.844286	0.823542	0.809235	0.808838	1	0.886164	0.747865	0.787311	0.810601	0.81272	0.792274	0.810086	0.874428	0.853807	0.842614	NA	NA	0	0.857916	0.873777	0.848908	0.798224	0.892246	1	0.787755	0.594175	0.829401
CpG_813	chr17	29326206	+	0.946749	0.960263	0.944677	0.96162	0.954904	0.955822	0.96626	0.9545	0.95559	0.943338	0.895184	0.96575	0.968929	1	0.943799	0.958206	0.952085	0.958441	0.960091	0.958592	0.945164	0.956801	0.930451	0.988	0.977946	0.93682	0.953906	0.952833	0.938957	0.965524	0.948263	0.964516	0.945386	0.935362	NA	NA	0.979167	0.927742	0.953448	0.968036	0.942557	0.998992	1	1	0.994163	0.939507
CpG_814	chr17	29326226	+	0.643396	0.703049	0.723283	0.728952	0.773788	0.717905	0.815663	0.664961	0.744926	0.68746	0.731586	0.5354	0.623648	1	0.646215	0.69882	0.766996	0.738377	0.811551	0.75	0.734158	0.719846	0.726759	0.743902	0.708626	0.678257	0.696598	0.711369	0.654185	0.731647	0.668758	0.692787	0.70957	0.591895	NA	NA	0	0.652475	0.711906	0.711566	0.571719	0.692229	0.682836	0.576446	0.590551	0.65058
CpG_815	chr17	29326239	+	0.437742	0.605359	0.561683	0.482994	0.552804	0.489134	0.593966	0.433246	0.595389	0.471548	0.527094	0.551295	0.577895	0.297297	0.536816	0.490186	0.581482	0.548016	0.564711	0.536383	0.556384	0.556862	0.544737	0.983505	0.455939	0.461169	0.439821	0.460344	0.464215	0.502642	0.444785	0.549402	0.56373	0.581596	NA	NA	0	0.539388	0.562056	0.591316	0.571136	0.600716	0.687023	0.857741	0.353575	0.511578
CpG_816	chr17	29326279	+	0.574166	0.728943	0.639792	0.565194	0.655058	0.607843	0.710585	0.526329	0.674082	0.571942	0.605845	0.554552	0.637149	0	0.642384	0.579933	0.628052	0.640113	0.726569	0.607149	0.635871	0.672862	0.600734	0.995984	0.648923	0.582993	0.564933	0.616142	0.553184	0.564283	0.564296	0.689205	0.698166	0.65531	NA	NA	0	0.636505	0.701504	0.675022	0.558966	0.758621	1	0.44898	0.40856	0.613865
CpG_817	chr17	29326289	+	0.877281	0.911952	0.858968	0.882098	0.881422	0.89075	0.931261	0.896438	0.889513	0.860047	0.854046	0.894085	0.909179	1	0.924533	0.868549	0.887716	0.892193	0.912449	0.891693	0.895094	0.88736	0.870223	1	0.895003	0.865193	0.870477	0.857189	0.864673	0.878526	0.863054	0.917452	0.907163	0.900148	NA	NA	0	0.901966	0.919502	0.902412	0.872131	0.957187	1	0.672199	0.733728	0.898209
CpG_818	chr17	35703917	-	0.369925	0.476319	0.560939	0.291534	0.459178	0.413296	0.533658	0.373462	0.524171	0.378378	0.541958	0.421854	0.573614	0.418426	0.536811	0.398324	0.514689	0.464935	0.585445	0.470121	0.442468	0.43519	0.464521	0.559501	0.480455	0.370392	0.322218	0.337127	0.324543	0.334476	0.334301	0.524414	0.505354	0.475307	0.377465	0.239087	0.434261	0.502164	0.507883	0.537927	0.51013	0.547988	0.584982	0.400281	0.402619	0.36454
CpG_819	chr17	35703961	-	0.225186	0.323341	0.385471	0.208849	0.301189	0.231407	0.339345	0.21611	0.401271	0.258993	0.365685	0.291314	0.383829	0.216706	0.413693	0.217921	0.343501	0.316738	0.369371	0.329049	0.306231	0.318969	0.294848	0.321722	0.34669	0.245872	0.208981	0.199559	0.202543	0.20501	0.201158	0.313793	0.322245	0.313561	0.300847	0.108289	0.253579	0.320419	0.312566	0.349799	0.328663	0.342461	0.433605	0.308842	0.27291	0.217356
CpG_820	chr17	35703987	-	0.111203	0.257912	0.284205	0.0919176	0.224342	0.161863	0.262973	0.131648	0.284677	0.17166	0.316569	0.150167	0.272209	0.126969	0.264037	0.124827	0.250249	0.185339	0.249524	0.26141	0.224277	0.223986	0.231104	0.23878	0.284822	0.160192	0.126465	0.114029	0.126651	0.12135	0.119918	0.197086	0.2379	0.221169	0.304225	0.175603	0.124814	0.218567	0.212217	0.231591	0.237221	0.279421	0.273917	0.227069	0.147719	0.138454
CpG_821	chr17	35704000	-	0.0693069	0.197306	0.237796	0.0462914	0.207254	0.130395	0.220905	0.0949064	0.217269	0.132087	0.258419	0.114463	0.218424	0.0913416	0.238395	0.076639	0.227663	0.130658	0.210357	0.216691	0.182027	0.208958	0.202796	0.212326	0.253009	0.120182	0.0913	0.0822858	0.105728	0.0997863	0.0925009	0.191223	0.202332	0.182241	0.168067	0.0192563	0.132999	0.187857	0.173629	0.208055	0.195944	0.241804	0.158006	0.185463	0.108996	0.106156
CpG_822	chr17	35704023	-	0.0252693	0.0512129	0.0796591	0.0147213	0.062339	0.0396313	0.100044	0.0275711	0.125059	0.0386565	0.114562	0.0416851	0.050645	0.00571429	0.0462737	0.0222635	0.0743494	0.0473458	0.0718686	0.0872645	0.0742555	0.060205	0.0683497	0.0606273	0.114591	0.0401139	0.037524	0.0316393	0.0324112	0.019135	0.0313624	0.0808114	0.0762258	0.0644608	0.0840336	0.000664894	0.0628801	0.0684736	0.0703255	0.0756044	0.0747918	0.0860934	0.0804138	0.0570385	0.0383712	0.0333769
CpG_823	chr17	36083781	+	0.0117855	0.00715421	0.0198625	0.00254022	0.00350877	0	0.00579374	0	0.00402762	0.00529801	0.00749766	0.00421257	0.0091653	0	0.00370885	0.0075188	0.00591716	0.00241838	0.0130058	0.000714286	0.0159827	0.0123119	0.00546117	0	0.00151745	0.00442696	0	0.0159151	0.00520208	0.00287632	0.00309491	0.00849515	0.0035769	0.0111524	NA	NA	0	0.00622307	0.0145026	0.00920952	0	0	NA	0	0	0.0147943
CpG_824	chr17	36083795	+	0.0140351	0.00556439	0.00762777	0.0127011	0.0139958	0.00883534	0.0196987	0.0152355	0.00574713	0.00595238	0.0121837	0.0139249	0.0134382	0	0.02595	0.00545703	0.0220075	0.029994	0.00935252	0.00394973	0.0125378	0.0245902	0.0051956	0	0	0.0147493	0.0508685	0.0140684	0.0108086	0.0201729	0.00687994	0.0155179	0.00791826	0.0111593	NA	NA	0.00284091	0.0263158	0.0165121	0.0201891	0.0340909	0	NA	0.204082	0	0.00924428
CpG_825	chr17	36083816	+	0.000294291	0.00638978	0.000766871	0.00765632	0	0	0.00029146	0.00626959	0.00720669	0.000668003	0.00425935	0.0121793	0.0106767	0	0.012141	0.0102669	0.0124966	0.0153939	0.00506329	0.00485612	0.0102665	0	0.000612089	0	0	0.0102168	0	0.00287853	0	0	0.0100764	0.00427742	0.001813	0.00314762	NA	NA	0	0.0019333	0.00729594	0.00425313	0	0	NA	0	0	0.00922897
CpG_826	chr17	36083819	+	0.0135493	0.0027933	0.0100193	0.00892099	0.00668779	0.0240228	0.00904845	0.00628711	0.0104076	0.0219124	0.00565238	0.0120247	0.00691244	0	0.0107754	0.0130226	0.00894067	0.00693398	0.0133671	0.00831826	0.0081016	0.0466431	0.00721412	0	0.00077101	0.0229084	0.00874453	0.00787099	0.00752033	0.0136585	0.0115324	0.0140831	0.0106383	0.0166903	NA	NA	0	0.0172038	0.0153125	0.004921	0.00071736	0.00214133	NA	0	0.0021645	0.0073961
CpG_827	chr17	36083823	+	0.000294031	0	0.00076599	0.00338983	0	0	0.00116245	0.0114544	0.00891573	0.00265252	0.0108184	0.00718016	0.00869565	0	0.0055775	0	0.0029554	0.0108271	0.00289122	0.00449156	0.000217297	0	0.00534841	0	0.00152091	0.000246427	0	0.00285442	0.00241935	0.000965251	0.0058793	0.00374608	0.00719702	0.0104329	NA	NA	0.00142653	0.0100768	0.00442077	0.00397029	0.0370634	0	NA	0	0	0.00895037
CpG_828	chr17	36083825	+	0.00529256	0.00359138	0.00650593	0.0135478	0.00105189	0.00684105	0.00116313	0.00243394	0.00492468	0.00365327	0.000475737	0.000487567	0.00673456	0	0.00418897	0.00547945	0.00215633	0	0.00108578	0.00305206	0.00108861	0	0.00809037	0	0	0	0.0111593	0.000381607	0.000201207	0.000482859	0.000521558	0.00549786	0.00257069	0.000312061	NA	NA	0	0.0060241	0.00113404	0.0114264	0	0	NA	0	0	0.00628199
CpG_829	chr17	36083837	+	0	0.00240096	0.00955292	0.00338266	0.00524843	0.00482703	0.00584966	0.000693722	0.00373349	0	0.00661001	0.0102057	0.00772011	0	0.00348028	0.00238989	0.00242066	0.00542823	0.00721761	0.00161261	0.00518695	0	0	0	0	0.0189983	0.019124	0	0.0160256	0.00144092	0.00206612	0.00525571	0.0079477	0.0097735	NA	NA	0	0.00287288	0.00158085	0.00691067	0	0	NA	0	0	0.000926033
CpG_830	chr17	36083846	+	0.00827179	0.0127898	0.0249329	0.00977476	0.0185639	0.0318035	0.00377687	0.0197917	0.00748848	0.00299501	0.00797748	0.00925174	0.0105073	0	0.0165656	0.0143639	0.0204686	0.0145322	0.0165706	0.0165557	0.0182015	0	0.0121692	0	0	0.0289103	0	0.00936723	0.0134322	0.00481232	0.0127586	0.0162272	0.0193441	0.014993	NA	NA	0.139205	0.0163148	0.0181077	0.00874373	0	0	NA	0	0.00213675	0.0034823
CpG_831	chr17	36083851	+	0	0.00572183	0.000839983	0.012065	0.000778513	0.00720396	0.00892288	0.000787402	0.00256987	0.00292184	0.00936037	0.00828083	0.0178987	0	0.0279969	0.0144267	0.0167665	0.00801871	0.00358423	0.00243471	0.00341297	0.0640809	0.00579873	0	0	0.00661853	0.00151172	0.0204651	0.000251826	0	0.00465608	0.00930983	0.00266166	0.00986156	NA	NA	0	0.024578	0.00715268	0.00718301	0.000873362	0	NA	0	0	0.0063857
CpG_832	chr17	36083857	+	0.0163743	0.00556439	0.0167683	0.0101351	0.00139665	0.0104418	0.0122306	0.000693001	0.00688468	0	0.000937207	0.00841152	0.00294503	0	0.000464253	0.00681663	0	0.0161968	0.00934579	0.00678814	0.00172786	0.00136426	0.0106189	0	0	0.0029513	0	0	0.00601202	0.00479846	0.00996564	0.00524088	0.00306513	0.00402851	NA	NA	0	0.0124283	0.011502	0.00178937	0.00144928	0	NA	0	0	0.00810748
CpG_833	chr17	36083866	+	0.0117165	0.000796178	0.00534351	0.0118343	0.00698812	0.00401929	0.0081728	0.002772	0.0172315	0.00463269	0.00937207	0.00614688	0.00851343	0	0.0130415	0.00408998	0.00429415	0.0120048	0.0108382	0.00214286	0.000433651	0.0164159	0.00303306	0	0	0.0142717	0	0.0060629	0.0127949	0.0115053	0.00516173	0.00665054	0.00536947	0.0055814	NA	NA	0	0.0071736	0.0063234	0.00484694	0.00142045	0	NA	0	0	0.00601852
CpG_834	chr17	36083873	+	0.012873	0.00795545	0	0.00675676	0	0.0177134	0.00929152	0	0.0138329	0.0171958	0	0.00549984	0.00785597	0	0.00371058	0.00272851	0.00753904	0.00480192	0.00361533	0	0.00865801	0.00136612	0.00941391	0	0	0	0	0.000379795	0.000801603	0.000958773	0.00103377	0.00524723	0.0017912	0.00342679	NA	NA	0	0.00965717	0.00610583	0.0046024	0	0	NA	0	0.0042735	0.00834106
CpG_835	chr17	36083884	+	0.0111046	0.0103339	0.00762195	0.00593723	0.00768156	0.00240964	0.00347423	0.00277008	0.010327	0	0.000937207	0.00582524	0.0088293	0	0.00324374	0.000681663	0	0.00180072	0.0122214	0.005	0.000863558	0	0.00394537	0	0.0424886	0.000492368	0	0.00530303	0	0.00287632	0.00206256	0.00261938	0.00460005	0.00528607	NA	NA	0.00283286	0.00573888	0.00587438	0.00433784	0	0	NA	0	0	0.00254159
CpG_836	chr17	36083890	+	0.00117233	0.00638978	0.00610221	0	0	0.00402253	0.0115942	0.0132128	0	0	0.0093985	0.00519818	0.00229058	0	0.00880853	0.00682594	0.00107354	0.00780781	0.00359712	0.00321429	0.00390456	0	0.0051609	0	0	0.00246063	0	0.00189825	0.00800641	0	0.00447658	0.00282943	0.0105263	0.00248293	NA	NA	0	0.00861656	0.0063234	0.00823045	0.00142045	0	NA	0	0	0.00277971
CpG_837	chr17	45601555	+	0.314204	0.298109	0.398482	0.276254	0.407674	0.32282	0.396098	0.334728	0.432353	0.279046	0.397833	0.33779	0.410165	0.511905	0.32426	0.348722	0.395792	0.311536	0.407509	0.387783	0.354255	0.314241	0.397129	0.289231	0.418567	0.286517	0.336323	0.301933	0.295792	0.36603	0.305245	0.370546	0.357311	0.386778	NA	NA	0.33913	0.374523	0.372308	0.401274	0.419643	0.386161	0.537037	0.214765	0.321705	0.339365
CpG_838	chr17	45601558	+	0.630935	0.774444	0.717557	0.666348	0.778436	0.763736	0.783121	0.670284	0.783121	0.700916	0.689168	0.685613	0.789349	0.819277	0.679953	0.629388	0.738988	0.709168	0.721668	0.676796	0.652148	0.718978	0.685791	0.614198	0.837398	0.598776	0.624501	0.617994	0.64265	0.688116	0.621103	0.691647	0.694129	0.715281	NA	NA	0.536	0.772657	0.721992	0.731034	0.780622	0.904018	0.384615	0.94	0.66537	0.723341
CpG_839	chr17	45601567	+	0.23312	0.341436	0.268939	0.227358	0.367925	0.334247	0.314869	0.313693	0.396117	0.238289	0.405239	0.291339	0.306413	0.566265	0.293981	0.294745	0.337705	0.259795	0.345555	0.351559	0.368453	0.319149	0.334043	0.409231	0.467532	0.283528	0.296963	0.267254	0.261641	0.315953	0.282756	0.346591	0.314754	0.340909	NA	NA	0.370079	0.341782	0.365137	0.349829	0.410811	0.613839	0.351852	0.47619	0.335938	0.309037
CpG_840	chr17	45601570	+	0.8101	0.841639	0.855787	0.763928	0.875147	0.848402	0.821532	0.816445	0.853229	0.820774	0.881804	0.878841	0.843862	0.75	0.797909	0.842449	0.90276	0.863005	0.845389	0.826679	0.834946	0.837076	0.834667	0.861538	0.910423	0.819063	0.815715	0.783505	0.799745	0.85499	0.808989	0.866825	0.82195	0.834821	NA	NA	0.867188	0.877692	0.870217	0.849828	0.862319	0.890135	0.592593	1	0.944882	0.843342
CpG_841	chr17	45601594	+	0.422717	0.519058	0.560766	0.381679	0.521739	0.47271	0.45633	0.439966	0.564229	0.453893	0.618153	0.405914	0.522837	0.654762	0.473623	0.388704	0.541114	0.493601	0.525299	0.493827	0.472069	0.504742	0.524678	0.378882	0.633058	0.429739	0.509423	0.432975	0.459477	0.436249	0.420725	0.518662	0.492837	0.483903	NA	NA	0.385827	0.545526	0.543307	0.525763	0.46422	0.637813	0.296296	0.533784	0.207317	0.464489
CpG_842	chr17	45601603	+	0.76273	0.776338	0.770082	0.731954	0.766528	0.721266	0.823471	0.812264	0.808983	0.748072	0.781961	0.708764	0.747154	0.796407	0.728983	0.686283	0.778299	0.769561	0.764168	0.746534	0.695226	0.698865	0.74448	0.786604	0.791736	0.697231	0.695603	0.726175	0.709199	0.728395	0.698514	0.751691	0.721002	0.737945	NA	0.0625	0.648438	0.759578	0.790356	0.737409	0.857274	0.852608	0.361905	0.824742	0.721443	0.789195
CpG_843	chr17	45601624	+	0.701627	0.766836	0.851456	0.69466	0.760555	0.760113	0.78476	0.743851	0.798708	0.687273	0.810683	0.763287	0.760024	0.854545	0.729105	0.701331	0.828313	0.782488	0.740621	0.689904	0.650946	0.704098	0.720556	0.828479	0.781016	0.696205	0.729384	0.685334	0.691297	0.703902	0.691434	0.693199	0.712316	0.693173	NA	1	0.512097	0.739992	0.766631	0.696274	0.794635	0.790993	0.596154	0.875862	0.739919	0.719715
CpG_844	chr17	45601635	+	0.716619	0.723568	0.74221	0.718602	0.634548	0.673933	0.801932	0.72314	0.718992	0.704752	0.736434	0.775439	0.682409	0.809524	0.667439	0.674194	0.740741	0.734215	0.705405	0.674841	0.652853	0.616261	0.677144	0.700617	0.809446	0.633131	0.686131	0.675361	0.674786	0.701036	0.677714	0.680932	0.668235	0.703302	NA	NA	0.643411	0.693016	0.691992	0.699757	0.766187	0.81573	0.296296	0.906667	0.871094	0.702593
CpG_845	chr17	45601639	+	0.723722	0.794702	0.73549	0.704717	0.688525	0.692448	0.811229	0.749794	0.748062	0.730847	0.803681	0.760526	0.728673	0.952381	0.710983	0.687349	0.75651	0.728752	0.715184	0.698506	0.699398	0.665803	0.72311	0.636086	0.737357	0.664926	0.71156	0.70081	0.680304	0.713695	0.704469	0.686581	0.681329	0.73692	NA	NA	0.5	0.75711	0.744626	0.71947	0.814748	0.796421	0.584906	0.906667	0.738281	0.736491
CpG_846	chr17	45601650	+	0.211307	0.399118	0.359095	0.283835	0.277193	0.210046	0.381136	0.291598	0.415861	0.219537	0.340491	0.255875	0.370892	0.380952	0.388439	0.213194	0.368592	0.29009	0.321364	0.34142	0.290419	0.314948	0.353626	0.387692	0.302589	0.287776	0.293624	0.265356	0.245348	0.185318	0.242934	0.370283	0.325105	0.391626	NA	NA	0.377953	0.382979	0.392857	0.328148	0.548387	0.367483	0.326923	0.28	0.280156	0.272494
CpG_847	chr17	45601664	+	0.47234	0.56969	0.492891	0.459001	0.46651	0.49228	0.582609	0.552785	0.594385	0.507553	0.644615	0.466725	0.553719	0.952381	0.602312	0.488691	0.584036	0.502709	0.596934	0.487607	0.503895	0.532374	0.498943	0.558642	0.546191	0.422693	0.471245	0.465124	0.417271	0.389403	0.459469	0.547383	0.539106	0.561825	NA	NA	0.364341	0.585236	0.586049	0.587864	0.692998	0.713647	0.351852	0.473333	0.22093	0.522026
CpG_848	chr17	47138124	+	0.898072	0.927771	0.860562	0.840152	0.890255	0.789311	0.933333	0.759287	0.854575	0.817214	0.938312	0.826764	0.867633	0.731792	0.89741	0.848271	0.802879	0.858618	0.828877	0.85453	0.890805	0.880773	0.847831	0.887591	0.823885	0.791903	0.827225	0.832054	0.846022	0.858185	0.821231	0.855128	0.853741	0.840468	0.684932	0.919522	0.931418	0.894538	0.85743	0.806236	0.860757	0.766535	0.885007	0.78379	0.811836	0.800496
CpG_849	chr17	47138152	+	0.914997	0.972534	0.979275	0.858984	0.994709	0.998972	0.978684	0.898293	0.981997	0.962733	0.969206	0.932234	0.972921	0.955069	0.978131	0.966714	0.95995	0.952381	0.944482	0.964248	0.96502	0.95624	0.983834	0.968271	0.992998	0.933069	0.953359	0.941204	0.942622	0.964316	0.947215	0.955253	0.971824	0.950628	0.836406	0.999201	0.973614	0.958539	0.968888	0.974158	0.973718	0.975213	0.932742	0.927055	0.992324	0.947508
CpG_850	chr17	47138168	+	0.937238	0.92	0.966667	0.94825	0.943262	0.958678	0.986965	0.952522	0.929043	1	0.993506	0.964945	0.972763	1	0.998	0.988439	0.992415	0.953186	0.991892	0.984208	0.957607	0.97578	0.952952	0.984969	0.962386	0.965537	0.97489	0.966134	0.978683	0.961215	0.955583	0.945703	0.965484	0.969652	1	0.900161	0.976775	0.979137	0.980242	0.98496	0.947419	0.988712	0.998951	0.939036	0.984889	0.937624
CpG_851	chr17	47926165	-	0.283757	0.397554	0.409565	0.330588	0.365986	0.232819	0.401205	0.308561	0.342574	0.417047	0.533898	0.319239	0.517812	0.222222	0.414552	0.357817	0.425926	0.372561	0.506276	0.385423	0.36691	0.394589	0.347291	0.335648	0.348683	0.381955	0.378484	0.333773	0.357319	0.406056	0.35327	0.449987	0.436174	0.406922	1	0.515625	0.489072	0.479873	0.43736	0.45179	0.514096	0.632487	0.470265	0.482748	0.450532	0.411073
CpG_852	chr17	47926205	-	0.366569	0.436641	0.469104	0.353357	0.429741	0.370056	0.472422	0.396584	0.525794	0.455099	0.532213	0.411453	0.575064	0.388889	0.527027	0.48163	0.542194	0.403915	0.490579	0.482354	0.484747	0.532357	0.502185	0.478583	0.500402	0.464634	0.487694	0.407057	0.437755	0.492719	0.418	0.523604	0.498834	0.503869	1	0.613839	0.532528	0.531473	0.512125	0.488697	0.549957	0.587829	0.529705	0.599098	0.462341	0.46621
CpG_853	chr17	50192710	+	0.315291	0.555773	0.523929	0.304613	0.566929	0.331091	0.532143	0.302623	0.502929	0.329187	0.479614	0.384562	0.429809	0.485714	0.441595	0.377968	0.440693	0.376386	0.479846	0.473275	0.453428	0.460013	0.478712	0.537716	0.490769	0.352068	0.361478	0.299012	0.33934	0.364305	0.337457	0.510271	0.470334	0.463249	0	0	0.502812	0.4852	0.476815	0.465918	0.472675	0.570725	0.559877	0.412509	0.405207	0.354719
CpG_854	chr17	50192720	+	0.434665	0.763957	0.704133	0.400174	0.761821	0.450187	0.711905	0.427017	0.650502	0.464627	0.665953	0.464534	0.684302	0.942857	0.686312	0.543291	0.670921	0.486486	0.707633	0.668385	0.66191	0.669036	0.683312	0.762846	0.723279	0.509994	0.504173	0.448525	0.527579	0.530018	0.483815	0.724079	0.674395	0.661812	0	0.191011	0.650169	0.698099	0.678724	0.661332	0.588327	0.756829	0.67418	0.488405	0.51047	0.483331
CpG_855	chr17	50192761	+	0.432927	0.789887	0.78853	0.410535	0.841039	0.51404	0.722123	0.446297	0.781734	0.458694	0.7708	0.485217	0.70902	0.857143	0.751787	0.544914	0.732343	0.558398	0.776655	0.716077	0.697316	0.712005	0.713753	0.727864	0.742571	0.550146	0.537371	0.464747	0.533995	0.555961	0.506061	0.758822	0.730786	0.7136	0	0.297143	0.719547	0.744489	0.738603	0.717371	0.715927	0.77333	0.785677	0.560494	0.601478	0.53535
CpG_856	chr17	51831302	-	0.778409	0.511945	0.67767	0.758065	0.542662	0.843284	0.550802	0.754258	0.540541	0.734973	0.554455	0.810945	0.490716	0	0.575758	0.824242	0.587112	0.779116	0.5	0.57085	0.571003	0.5936	0.602695	0.838926	0.658593	0.760417	0.786357	0.783592	0.741832	0.797441	0.771399	0.535833	0.503047	0.620533	1	1	0.764398	0.538936	0.591562	0.65655	0.65666	0.255319	0.551282	0.626728	1	0.787196
CpG_857	chr17	51831377	-	0.433908	0.380623	0.335294	0.52381	0.411765	0.411985	0.410667	0.47561	0.362573	0.40274	0.45	0.354271	0.383598	0	0.304348	0.515152	0.286747	0.5	0.270742	0.343771	0.303019	0.364211	0.285072	0.180602	0.271147	0.371738	0.408424	0.372739	0.399573	0.490043	0.410323	0.387996	0.291785	0.389677	1	1	0.770833	0.299383	0.31696	0.333069	0.405253	0.417021	0.318471	0.407407	0.75	0.483254
CpG_858	chr17	56099233	+	0.83728	0.885442	0.850476	0.862061	0.829323	0.773915	0.863672	0.826658	0.8627	0.839136	0.864245	0.846021	0.81828	0.835232	0.870437	0.848126	0.846859	0.813129	0.841535	0.857232	0.861769	0.873915	0.854738	0.880582	0.870987	0.860854	0.850268	0.858813	0.849652	0.85383	0.839289	0.867922	0.836737	0.876774	0.900337	0.803279	0.830342	0.840467	0.856423	0.849752	0.847669	0.840983	0.837516	0.865983	0.84381	0.83317
CpG_859	chr17	56099245	+	0.91744	0.899724	0.907311	0.889048	0.917781	0.894844	0.906498	0.872367	0.898357	0.910264	0.916189	0.894543	0.931499	0.884768	0.877618	0.88346	0.909831	0.861676	0.890458	0.906694	0.912212	0.909506	0.901258	0.915035	0.912457	0.919118	0.902166	0.887911	0.88532	0.908245	0.89056	0.895956	0.903587	0.911009	0.910377	0.892654	0.912427	0.897178	0.903231	0.897733	0.924027	0.925782	0.903348	0.903458	0.88221	0.892356
CpG_860	chr17	56099258	+	0.910091	0.929469	0.93805	0.908417	0.896577	0.950909	0.941378	0.948632	0.955584	0.942377	0.927024	0.89894	0.94717	0.934852	0.946043	0.922116	0.946665	0.911186	0.923714	0.951402	0.934798	0.948586	0.941648	0.970089	0.96184	0.920439	0.930976	0.940254	0.937627	0.928623	0.940583	0.938616	0.931949	0.938969	0.910438	0.952558	0.938816	0.919537	0.932734	0.928934	0.951722	0.924765	0.950066	0.937734	0.914764	0.923783
CpG_861	chr17	56099298	+	0.608774	0.741191	0.700731	0.648066	0.691495	0.575026	0.636871	0.645418	0.692953	0.65694	0.694529	0.615811	0.693883	0.615333	0.720599	0.598224	0.70501	0.594902	0.613535	0.76907	0.758294	0.760281	0.768695	0.810143	0.780177	0.729384	0.722062	0.708313	0.670689	0.681003	0.679934	0.699207	0.715668	0.725371	0.707865	0.676246	0.69552	0.682086	0.683415	0.684804	0.699658	0.694602	0.628481	0.64777	0.616213	0.598398
CpG_862	chr17	56099308	+	0.636138	0.738324	0.755383	0.663135	0.733119	0.594508	0.64734	0.697435	0.684861	0.704779	0.722437	0.671762	0.712117	0.670037	0.683449	0.658358	0.718919	0.610334	0.632257	0.789684	0.790681	0.785353	0.798184	0.845462	0.795883	0.762573	0.732161	0.743967	0.702022	0.724994	0.72379	0.736202	0.740089	0.740998	0.8838	0.71343	0.705795	0.694626	0.716754	0.711466	0.727045	0.711015	0.665691	0.680576	0.646515	0.633279
CpG_863	chr17	56099313	+	0.634748	0.714947	0.707573	0.651986	0.696402	0.584647	0.64565	0.676254	0.659959	0.704029	0.715439	0.634582	0.687466	0.586106	0.696058	0.633372	0.715289	0.60126	0.62568	0.756383	0.759898	0.751853	0.763266	0.806569	0.774934	0.710974	0.707887	0.727351	0.671375	0.683711	0.69411	0.720344	0.735522	0.725409	0.692517	0.734541	0.679282	0.678349	0.698961	0.706853	0.71871	0.693912	0.638422	0.684007	0.632519	0.61536
CpG_864	chr17	56099319	+	0.565522	0.650384	0.678128	0.541207	0.664101	0.504786	0.584106	0.579058	0.65054	0.625754	0.682545	0.562053	0.659454	0.496949	0.662567	0.577311	0.649527	0.554159	0.580111	0.709569	0.723285	0.706733	0.710384	0.746903	0.7341	0.623953	0.631932	0.649441	0.587386	0.589251	0.624002	0.676933	0.690428	0.679179	0.810041	0.580396	0.597236	0.648326	0.663134	0.663541	0.689325	0.661669	0.620082	0.61765	0.582322	0.563382
CpG_865	chr17	56099339	+	0.556764	0.707046	0.704764	0.557136	0.691807	0.520238	0.577884	0.57284	0.654104	0.641429	0.67232	0.574788	0.679425	0.530493	0.646562	0.550188	0.684519	0.545308	0.594803	0.708798	0.732798	0.717242	0.72452	0.771504	0.737243	0.63074	0.63063	0.600392	0.593348	0.589347	0.61096	0.68488	0.689404	0.691472	0.73392	0.596887	0.598725	0.668757	0.681626	0.684134	0.690015	0.668372	0.624293	0.590838	0.587668	0.542016
CpG_866	chr17	56829847	+	0.0886238	0.111111	0.149485	0.0646998	0.122618	0.108268	0.12087	0.090669	0.123299	0.0566245	0.123211	0.0683333	0.115507	0	0.0890168	0.068498	0.0997514	0.0712242	0.116304	0.0986037	0.0987594	0.116733	0.103614	0.203846	0.0844773	0.0774243	0.0897091	0.0604037	0.0786303	0.0930052	0.0688195	0.127268	0.0985874	0.0990712	0	NA	0	0.134386	0.123085	0.119041	0.170708	0.207679	0	0	0	0.0703346
CpG_867	chr17	56829853	+	0.010952	0.0172324	0.0299844	0.0165289	0.0252182	0.0121065	0.030303	0.0166157	0.0273693	0.0136314	0.0238532	0.00702189	0.028764	0	0.0109649	0.0217391	0.0281211	0.0377715	0.0189624	0.0239931	0.0323419	0.0302357	0.0194333	0.00192308	0.0269271	0.0225708	0.016116	0.0151358	0.0235871	0.0183415	0.0273828	0.0337777	0.0337628	0.0259018	0	NA	0	0.0369947	0.0336209	0.0221594	0.0455426	0.139373	0	0	0	0.0199553
CpG_868	chr17	56829881	+	0.0252536	0.0205553	0.0300782	0.0296846	0.0114002	0.0339445	0.0399255	0.0226052	0.0372083	0.0132134	0.0412629	0.0212675	0.021774	0	0.0175319	0.00800997	0.0288553	0.0247093	0.0204529	0.0358423	0.022006	0.0487592	0.0237504	0.00105152	0.0332744	0.0194764	0.0407396	0.0294802	0.0197653	0.026468	0.0226839	0.0344577	0.0259201	0.021901	0	NA	0	0.0257194	0.0394867	0.0346424	0.0504386	0.126969	0	0.00277778	0.00271003	0.0227785
CpG_869	chr17	56829892	+	0.029157	0.0358921	0.0359586	0.0278494	0.0259898	0.0365824	0.0425015	0.022339	0.0361917	0.0413718	0.0471236	0.0176862	0.0391804	0	0.0250384	0.029174	0.0154012	0.0286347	0.0290167	0.0295535	0.0195998	0.0283926	0.0179583	0.073501	0.0132837	0.0240593	0.0223335	0.0179583	0.0181312	0.0376302	0.0170075	0.0367283	0.0206938	0.0259062	0	NA	0	0.0360825	0.0463559	0.0314437	0.042439	0.148246	0	0	0.214634	0.0267704
CpG_870	chr17	56829905	+	0.0126823	0.0361257	0.0292214	0.0134332	0.00680768	0.0243191	0.0236411	0.0118551	0.017252	0.0276107	0.0239558	0.0193146	0.0153119	0	0.0198413	0.0122958	0.0177442	0.0211011	0.0338922	0.0215936	0.0199622	0.0266876	0.0187987	0	0.00744879	0.0343232	0.0116911	0.0127246	0.0105448	0.0160021	0.0147215	0.0210065	0.0171074	0.0151589	0	NA	0	0.0157943	0.0334766	0.0222572	0.015694	0.0579965	0	0.00502513	0.245146	0.0142825
CpG_871	chr17	56829911	+	0.00843348	0.00341566	0.0123626	0.00772798	0.018932	0.0089372	0.00629697	0.00262985	0.00944559	0.0130506	0.0147601	0.00666389	0.0107962	0	0.00307355	0.00510384	0.00953846	0.0121413	0.0102205	0.00837269	0.00520579	0.0156701	0.00867438	0	0	0.0157194	0.00215895	0.0101723	0.00649814	0.0222309	0.00874827	0.0102637	0.0104545	0.001443	0	NA	0	0.0110806	0.00986947	0.0070695	0.0465793	0.0227074	0	0	0	0.0100015
CpG_872	chr17	56829934	+	0.0211149	0.0167102	0.0125147	0.00515198	0.0116845	0.0150412	0.0105306	0.000437637	0.00939926	0.0174008	0.0140587	0.00041511	0.00898069	0	0.00131984	0	0.00709877	0.0113601	0.0161522	0.00835614	0.00770113	0.00648479	0.00983167	0	0.0111821	0.0121692	0.0143865	0.0046428	0.00923567	0.000779018	0.00954527	0.00951388	0.0102862	0.00662639	0	NA	0	0.00805153	0.0144631	0.0151085	0.00292683	0.0579965	0	0	0	0.00989654
CpG_873	chr17	56829948	+	0.00717602	0.00782473	0.0137094	0.00360082	0.00293112	0.011611	0.0181745	0.0078982	0.024121	0.00656814	0.0196199	0.000414594	0.00719748	0	0.00877578	0.00979706	0.00585516	0.00602028	0.00680272	0.00543168	0.0096358	0.0120133	0.00815661	0	0.00423953	0.0114899	0.00565124	0.0126375	0.00857007	0.0124902	0.0057971	0.00806137	0.00712272	0.0102693	0	NA	0	0.021019	0.00801119	0.00685442	0	0.0824561	0	0	0	0.00955652
CpG_874	chr17	66417807	+	0.799318	0.665327	0.681942	0.712247	0.665542	0.768	0.595592	0.740363	0.655311	0.77625	0.69975	0.718037	0.599811	0.633763	0.72047	0.752763	0.624745	0.736678	0.620072	0.683481	0.672108	0.663119	0.679467	0.662996	0.674523	0.717773	0.693382	0.666962	0.689703	0.685663	0.745375	0.630553	0.658885	0.65095	0.488889	0.610159	0.735	0.641584	0.628384	0.646257	0.615807	0.634095	0.571714	0.711622	0.695857	0.764794
CpG_875	chr17	66417866	+	0.726208	0.55869	0.577277	0.633875	0.612482	0.626004	0.511065	0.576662	0.58136	0.633856	0.609482	0.650368	0.503088	0.597817	0.598176	0.674573	0.529939	0.605153	0.529789	0.621198	0.583825	0.583687	0.592817	0.544777	0.601619	0.622073	0.578181	0.561574	0.584469	0.571943	0.603226	0.534805	0.570801	0.571121	0.488889	0.604946	0.677321	0.537809	0.551929	0.538867	0.532979	0.522468	0.580056	0.6289	0.569881	0.644577
CpG_876	chr18	11048374	-	0.130643	0.0750615	0.0879814	0.107882	0.0716808	0.0891575	0.0807344	0.0957447	0.0580938	0.0953972	0.100896	0.0811397	0.0745573	0	0.0720881	0.113049	0.0951939	0.0948364	0.0754243	0.0724475	0.0779524	0.0974053	0.0850556	0.0420624	0.0533243	0.0765759	0.0907591	0.0963868	0.0908626	0.119483	0.0933433	0.0811009	0.0611427	0.0695203	NA	NA	0.00114025	0.0994805	0.107922	0.0618485	0.119917	0.0864686	0	0.0371094	0.0471576	0.0870152
CpG_877	chr18	11048381	-	0.0729384	0.0249489	0.036322	0.0360682	0.0254867	0.0330454	0.0471087	0.0286118	0.0299818	0.033137	0.031746	0.0391854	0.0403226	0	0.0180723	0.0390071	0.0407125	0.0351234	0.0209048	0.0283846	0.0312066	0.0487405	0.0189633	0.0615697	0.00806181	0.035497	0.0445696	0.0466951	0.0409461	0.0450575	0.0394022	0.0256941	0.0239413	0.0284896	NA	NA	0	0.0368461	0.0247208	0.0120565	0.023957	0.000646831	0	0.18677	0.12492	0.029541
CpG_878	chr18	11048394	-	0.039881	0.0188757	0.035059	0.0463734	0.0261762	0.0206224	0.0288917	0.0180723	0.0208019	0.0358463	0.0402945	0.0315301	0.0273207	0.310127	0.0570004	0.0284146	0.0280417	0.0428025	0.0302841	0.0224809	0.0407659	0.0469166	0.0244634	0.000675219	0.0501515	0.030426	0.0495421	0.0349457	0.0298413	0.0594784	0.0364287	0.030292	0.0339355	0.0287607	NA	NA	0.0728929	0.0223027	0.0378709	0.0234429	0.0484272	0.0355297	0	0.0621359	0.0365151	0.0380859
CpG_879	chr18	11048397	-	0.045929	0.0114848	0.0303624	0.0428686	0.032932	0.0298564	0.0166708	0.024735	0.0302939	0.0467944	0.01821	0.0210526	0.0216584	0	0.026204	0.0280193	0.0259921	0.0287678	0.0210163	0.0261897	0.0311435	0.0296888	0.0233222	0.0717671	0.0222073	0.0373113	0.0242011	0.0373862	0.0413749	0.0458996	0.0276202	0.0344491	0.0262717	0.0243902	NA	NA	0	0.0288058	0.0293062	0.0240278	0.0475207	0.000645161	0	0	0.000641437	0.0293506
CpG_880	chr18	11048400	-	0.0267857	0.0163733	0.0196399	0.0285941	0.0116938	0.0309902	0.0191829	0.0287744	0.00634441	0.0162122	0.0263464	0.0550572	0.0192069	0	0.012766	0.0174194	0.00971772	0.018594	0.0265376	0.0150738	0.0167546	0.0528155	0.00886497	0.0311231	0.00708263	0.0258646	0.0350094	0.023835	0.0411449	0.0330427	0.0295463	0.0202464	0.0188436	0.0146592	NA	NA	0.00114286	0.0159156	0.0251271	0.0145813	0.0239596	0.0542285	0.00263852	0.038835	0	0.0253645
CpG_881	chr18	11048405	-	0.0104353	0.0241309	0.0101307	0.0139442	0.0145597	0.0170519	0.0296503	0.0208554	0.0174699	0.0166359	0.00780031	0.0170279	0.00973312	0	0.0309719	0.0220708	0.0315399	0.0201479	0.0200627	0.0155399	0.0173428	0.0272262	0.0169331	0.0243079	0.00705882	0.013246	0.0225936	0.0181353	0.024496	0.0357528	0.0161988	0.0215133	0.014545	0.0193412	NA	NA	0.00227531	0.0179424	0.0138554	0.014712	0.0148637	0.0470361	0.00263852	0	0.0352564	0.0277914
CpG_882	chr18	11048422	-	0.151393	0.105209	0.114684	0.1322	0.0998586	0.1278	0.0924863	0.105142	0.120544	0.133198	0.127403	0.12386	0.101879	0.201893	0.151342	0.131817	0.142096	0.129547	0.103454	0.0901016	0.103585	0.136934	0.0794218	0.0590431	0.103769	0.0991916	0.15243	0.115308	0.120281	0.175634	0.104643	0.110663	0.110284	0.118956	NA	NA	0.0733104	0.130022	0.131547	0.0905616	0.149223	0.0795196	0.143808	0.162136	0.0755627	0.129157
CpG_883	chr18	11048438	-	0.14985	0.101458	0.13237	0.120868	0.107998	0.070646	0.121869	0.113911	0.101498	0.126134	0.125292	0.106766	0.130002	0.141956	0.166518	0.126158	0.135406	0.114534	0.124098	0.111749	0.1075	0.183885	0.12509	0.0608875	0.105931	0.133084	0.151277	0.135395	0.136209	0.170244	0.139616	0.113719	0.0988603	0.141733	NA	NA	0	0.143037	0.138282	0.106705	0.219227	0.085761	0.188172	0.204926	0.143042	0.128978
CpG_884	chr18	11048441	-	0.0697853	0.0224131	0.0492411	0.0430612	0.0596961	0.0469083	0.0632441	0.0379147	0.0588417	0.0668326	0.0550696	0.0620723	0.0397709	0	0.0376662	0.0514181	0.0584935	0.0467767	0.0451634	0.0515157	0.040116	0.0561702	0.0312809	0	0.0560126	0.0450626	0.0493361	0.0554226	0.063561	0.0735842	0.0623755	0.0505454	0.0337544	0.0556774	NA	NA	0.000595238	0.0694264	0.0386166	0.0529374	0.04104	0.0737018	0	0.0366599	0.0305164	0.0519572
CpG_885	chr18	11048443	-	0.148829	0.135234	0.189481	0.162002	0.127809	0.126913	0.105289	0.160155	0.116286	0.138665	0.164479	0.140789	0.131668	0.446541	0.172607	0.172602	0.142168	0.149038	0.134412	0.144739	0.154071	0.183953	0.117564	0.198515	0.114727	0.152638	0.199439	0.173144	0.171946	0.189514	0.181896	0.152311	0.143881	0.128529	NA	NA	0.0806818	0.158944	0.147606	0.134215	0.247733	0.132646	0.137566	0.168279	0.165173	0.15293
CpG_886	chr18	11048468	-	0.134484	0.137551	0.106619	0.128713	0.0903657	0.148315	0.100771	0.12103	0.101323	0.166544	0.133462	0.112958	0.105784	0	0.127389	0.132709	0.124364	0.111563	0.109034	0.11212	0.0956642	0.120556	0.11155	0.0148448	0.151393	0.117426	0.130476	0.108117	0.142404	0.142073	0.119045	0.114497	0.117262	0.161053	NA	NA	0.0534699	0.131835	0.151705	0.121216	0.191085	0.0669672	0.110818	0.257253	0.204225	0.117876
CpG_887	chr18	11048477	-	0.0398217	0.0383987	0.0394909	0.0246227	0.0285312	0.0614693	0.00323866	0.0198371	0.0304676	0.0408539	0.0167445	0.0341959	0.0304442	0	0.0301098	0.0267053	0.0354726	0.0313936	0.0332288	0.0311154	0.0262265	0.0408998	0.0336775	0.0438893	0.0522766	0.0224735	0.0454545	0.0384985	0.035542	0.0519401	0.0279219	0.035575	0.0257136	0.0462071	NA	NA	0.0522727	0.0304704	0.043394	0.0400552	0.0160891	0.0560567	0.110818	0.0773694	0.000640205	0.0353099
CpG_888	chr18	11048479	-	0.038152	0.0244898	0.0436909	0.0209901	0.0492438	0.0487622	0.0313901	0.0416373	0.0273849	0.0415594	0.0552764	0.0357143	0.0386638	0	0.0410329	0.0379543	0.0325936	0.0347737	0.0385218	0.0305392	0.0435858	0.0347222	0.0310372	0.00135044	0.0513595	0.0361533	0.0431115	0.0341707	0.0306834	0.0513485	0.0391261	0.0421526	0.0377746	0.0344465	NA	NA	0.0522727	0.0405714	0.0556217	0.0456184	0.0560825	0.0367268	0	0	0.0570147	0.0385973
CpG_889	chr18	11048481	-	0.118087	0.161488	0.145847	0.123957	0.119182	0.125422	0.122715	0.11005	0.102379	0.149853	0.141031	0.113771	0.098539	0.402516	0.128975	0.101935	0.124622	0.135073	0.107466	0.119699	0.104651	0.135676	0.117451	0.141216	0.0898915	0.107055	0.123532	0.11813	0.117782	0.116006	0.117088	0.139524	0.127385	0.139307	NA	NA	0.247153	0.113844	0.12061	0.136863	0.172114	0.0760799	0.253968	0.0658915	0.115311	0.134155
CpG_890	chr18	32430782	-	0.767655	0.806265	0.780264	0.766318	0.804194	0.757807	0.831481	0.793809	0.826147	0.798045	0.775622	0.788591	0.769884	0.81287	0.790131	0.746748	0.801276	0.735238	0.797771	0.826214	0.784617	0.810119	0.818908	0.843706	0.821278	0.810739	0.813545	0.828948	0.790048	0.819643	0.789996	0.793259	0.789391	0.801026	1	0.749357	0.73711	0.794452	0.793343	0.800584	0.792961	0.766716	0.801541	0.787659	0.782103	0.740987
CpG_891	chr18	32430839	-	0.585191	0.698314	0.665664	0.587709	0.686134	0.55634	0.688993	0.614027	0.709549	0.628154	0.67473	0.646822	0.66858	0.621746	0.653309	0.584809	0.693134	0.599488	0.698278	0.703343	0.688629	0.716343	0.702942	0.727662	0.713018	0.678917	0.672963	0.655096	0.648558	0.648391	0.62576	0.668637	0.680265	0.688784	0	0.608999	0.635167	0.669266	0.667983	0.663797	0.660128	0.642318	0.628909	0.619432	0.618958	0.586232
CpG_892	chr18	32430851	-	0.85008	0.889316	0.859436	0.847584	0.882337	0.816264	0.864616	0.859585	0.899273	0.849741	0.868861	0.84903	0.84138	0.903076	0.853711	0.831969	0.843848	0.822402	0.859744	0.880256	0.854619	0.887519	0.8774	0.897781	0.876161	0.883005	0.883779	0.875419	0.861915	0.882921	0.856236	0.849082	0.854653	0.85367	1	0.85228	0.855767	0.84045	0.847133	0.853184	0.87641	0.822102	0.827169	0.844357	0.841057	0.818476
CpG_893	chr18	32430886	-	0.562916	0.633545	0.627571	0.569349	0.630048	0.561192	0.672464	0.567921	0.674937	0.596613	0.639069	0.587582	0.609729	0.482816	0.62021	0.578295	0.644438	0.550528	0.673668	0.664768	0.651601	0.647266	0.669344	0.671477	0.637898	0.639708	0.612164	0.618805	0.61269	0.578296	0.565943	0.637365	0.640663	0.646268	0	0.450633	0.661974	0.646628	0.672234	0.634379	0.645705	0.60393	0.64472	0.601527	0.574846	0.55045
CpG_894	chr18	32430889	-	0.791166	0.826204	0.826092	0.779184	0.825537	0.760917	0.841088	0.811134	0.831342	0.784699	0.822871	0.791961	0.808082	0.833194	0.796461	0.77842	0.799049	0.756147	0.825591	0.84616	0.828624	0.840336	0.842889	0.865272	0.845814	0.851684	0.835208	0.844187	0.826766	0.827414	0.802216	0.817822	0.816678	0.836506	1	0.720607	0.807247	0.799219	0.81874	0.803924	0.828472	0.771438	0.811241	0.860949	0.80955	0.748746
CpG_895	chr18	45590053	+	0.73029	0.6302	0.686822	0.754925	0.668772	0.704918	0.632049	0.718075	0.674728	0.642241	0.70989	0.614811	0.609742	0.612389	0.695849	0.725962	0.702479	0.683447	0.662996	0.704135	0.730633	0.732912	0.710873	0.739252	0.717358	0.742565	0.706726	0.722628	0.730446	0.722458	0.688848	0.675122	0.700985	0.706888	1	0.978723	0.745709	0.709851	0.713991	0.680196	0.680117	0.705201	0.733635	0.753578	0.738039	0.682702
CpG_896	chr18	45590166	+	0.710115	0.738628	0.737006	0.736759	0.780453	0.725166	0.79798	0.671012	0.810565	0.684515	0.824613	0.670139	0.817241	0.520499	0.743161	0.716791	0.837364	0.712952	0.824414	0.768213	0.773716	0.744272	0.772681	0.751275	0.770149	0.711815	0.682691	0.659548	0.736513	0.689941	0.730863	0.814671	0.779676	0.806212	0	0.867327	0.644476	0.804976	0.786483	0.793674	0.784836	0.831328	0.791961	0.80275	0.684049	0.6478
CpG_897	chr18	60750571	+	0.770149	0.669048	0.714834	0.646503	0.645714	0.7725	0.628686	0.669107	0.717117	0.747596	0.597647	0.690769	0.696	0.554545	0.723913	0.6875	0.620585	0.695357	0.712036	0.660276	0.67047	0.658905	0.687982	0.72006	0.713696	0.676204	0.678369	0.687324	0.6898	0.716319	0.687424	0.649185	0.641219	0.689024	1	0.7603	0.642653	0.639934	0.683833	0.694745	0.667784	0.70093	0.62065	0.627515	0.699949	0.685691
CpG_898	chr18	60750617	+	0.358476	0.317746	0.393726	0.268501	0.372849	0.374609	0.455533	0.303519	0.366184	0.316867	0.307783	0.334618	0.305533	0.690909	0.412527	0.40578	0.319859	0.401917	0.370704	0.365436	0.381443	0.372079	0.394029	0.442458	0.436455	0.364839	0.361433	0.315101	0.325674	0.362403	0.325288	0.336999	0.353563	0.409276	1	0.31391	0.286944	0.314573	0.372183	0.359657	0.328133	0.385403	0.316279	0.313336	0.400257	0.342513
CpG_899	chr18	60750625	+	0.389717	0.407628	0.49007	0.316935	0.449952	0.419476	0.443174	0.315209	0.480578	0.378313	0.431257	0.331024	0.4168	0.581818	0.582703	0.435959	0.403234	0.529345	0.424804	0.45118	0.469459	0.474451	0.550952	0.499925	0.462941	0.433764	0.436252	0.404428	0.441305	0.436123	0.395688	0.420857	0.445543	0.494671	1	0.412758	0.473322	0.417765	0.430035	0.412987	0.417755	0.457778	0.456927	0.396159	0.51793	0.415172
CpG_900	chr18	60750630	+	0.247166	0.307876	0.368252	0.247159	0.316346	0.22918	0.362844	0.184559	0.304779	0.268204	0.316843	0.204351	0.306645	0.365297	0.35027	0.287273	0.270981	0.330489	0.270681	0.305836	0.318322	0.311684	0.383481	0.396443	0.325599	0.294856	0.265971	0.236848	0.252513	0.286577	0.247841	0.307818	0.265716	0.376961	1	0.276836	0.243966	0.282666	0.324613	0.297235	0.273124	0.398528	0.262667	0.18348	0.410659	0.245805
CpG_901	chr18	60750657	+	0.291045	0.264916	0.403329	0.244318	0.311663	0.326223	0.423387	0.240413	0.403255	0.293976	0.324645	0.227343	0.324238	0.66055	0.468547	0.330519	0.343434	0.3379	0.354658	0.324224	0.352974	0.339848	0.398302	0.378655	0.375228	0.336307	0.257751	0.263778	0.30987	0.324392	0.263507	0.317124	0.349103	0.351455	1	0.119403	0.283496	0.305437	0.336636	0.328342	0.283317	0.319196	0.357477	0.252112	0.370543	0.289855
CpG_902	chr18	66022698	-	0.223602	0.433333	0.264271	0.330059	0.526485	0.278912	0.319239	0.219285	0.455238	0.290598	0.393089	0.31068	0.471698	0.110092	0.448864	0.244048	0.403846	0.332	0.362971	0.362375	0.408911	0.348343	0.386403	0.376426	0.412782	0.296	0.253396	0.286765	0.307803	0.315493	0.267649	0.448185	0.382755	0.4	NA	0	0.454545	0.374832	0.391837	0.43299	0.399725	0.526048	0.566154	0.666667	0.447977	0.32135
CpG_903	chr18	66022715	-	0.284826	0.371747	0.411392	0.37232	0.541329	0.347439	0.5	0.402799	0.68381	0.45182	0.544276	0.42233	0.486486	0.110092	0.454545	0.342857	0.512853	0.381457	0.394792	0.471572	0.474702	0.467027	0.523588	0.416904	0.499476	0.406631	0.380196	0.389625	0.41875	0.443583	0.361628	0.532982	0.407277	0.456752	NA	0.242105	0.276033	0.436658	0.462573	0.493254	0.432395	0.560976	0.513846	0.539452	0.661829	0.391553
CpG_904	chr18	66022735	-	0.282147	0.456401	0.405263	0.378299	0.587903	0.519466	0.518085	0.344747	0.589719	0.365591	0.564655	0.429498	0.508086	0.40367	0.404286	0.304659	0.420206	0.425234	0.442006	0.437867	0.497027	0.461385	0.445678	0.430894	0.514489	0.447032	0.386241	0.375923	0.401302	0.438696	0.344713	0.529761	0.454921	0.497453	NA	0	0.471322	0.463621	0.436305	0.500993	0.422307	0.595116	0.574924	0.577328	0.491241	0.39233
CpG_905	chr18	66022748	-	0.338941	0.393657	0.385021	0.369141	0.54311	0.498884	0.482465	0.424337	0.515267	0.436695	0.531755	0.536091	0.543742	0.411215	0.454286	0.377167	0.382692	0.431621	0.476987	0.4259	0.502609	0.462554	0.512544	0.492109	0.564177	0.454632	0.415356	0.407797	0.432588	0.491594	0.417761	0.55519	0.452222	0.503869	NA	0	0.618651	0.524357	0.441513	0.506751	0.458506	0.665813	0.693721	0.707829	0.639332	0.436027
CpG_906	chr18	66022769	-	0.18408	0.301115	0.229958	0.221135	0.354735	0.232816	0.264831	0.201248	0.375238	0.343284	0.314775	0.254428	0.378016	0	0.221591	0.25537	0.315385	0.240372	0.343392	0.29102	0.315711	0.284477	0.341265	0.320611	0.310832	0.278495	0.248717	0.227708	0.241462	0.265048	0.217054	0.359232	0.293887	0.316367	NA	0	0.322314	0.239408	0.313084	0.351544	0.286986	0.409149	0.330275	0.354167	0.413545	0.222855
CpG_907	chr18	70582481	-	0.441493	0.676221	0.653503	0.424299	0.690759	0.453027	0.708007	0.435337	0.722058	0.477658	0.666005	0.455482	0.713618	0.427404	0.666932	0.417692	0.704891	0.494538	0.709495	0.654515	0.650053	0.692145	0.660733	0.7092	0.714049	0.48816	0.508158	0.377888	0.433439	0.492878	0.422892	0.678869	0.690343	0.687089	0.457439	0.475253	0.536658	0.679449	0.677999	0.661023	0.721957	0.770164	0.705038	0.618728	0.533665	0.452446
CpG_908	chr18	70582499	-	0.459162	0.751381	0.724417	0.468456	0.765977	0.520544	0.771067	0.454103	0.763002	0.499483	0.714333	0.50999	0.753458	0.473351	0.732679	0.462781	0.780879	0.529043	0.781498	0.72752	0.715453	0.769716	0.721498	0.796361	0.801258	0.54112	0.569936	0.424078	0.475767	0.53297	0.451916	0.736102	0.750334	0.743244	0.457526	0.560689	0.570424	0.744613	0.73404	0.725564	0.78456	0.856225	0.77082	0.651982	0.559526	0.462785
CpG_909	chr18	70582507	-	0.414446	0.716053	0.708393	0.433181	0.703602	0.481842	0.737507	0.424619	0.732571	0.501555	0.740311	0.45719	0.711633	0.456749	0.699867	0.406917	0.757203	0.493095	0.761607	0.690403	0.690923	0.743932	0.697782	0.761672	0.778491	0.496942	0.527593	0.383036	0.441395	0.468616	0.422539	0.714606	0.727536	0.713219	0.455364	0.503779	0.549169	0.723806	0.715617	0.704533	0.762118	0.822949	0.751059	0.636138	0.53295	0.44648
CpG_910	chr18	70582511	-	0.367086	0.653746	0.61803	0.397023	0.667051	0.425795	0.685899	0.40625	0.644231	0.458021	0.68994	0.424917	0.653348	0.412379	0.632604	0.384117	0.668066	0.458596	0.681883	0.618236	0.628827	0.69311	0.617509	0.693604	0.718004	0.450994	0.491389	0.336007	0.379217	0.441448	0.380262	0.642464	0.644848	0.640699	0.415165	0.486307	0.522838	0.651999	0.63542	0.642895	0.702461	0.757089	0.69457	0.571613	0.487754	0.41693
CpG_911	chr18	70582513	-	0.486492	0.715447	0.748679	0.46604	0.746969	0.508528	0.735558	0.47526	0.74349	0.496128	0.756694	0.490551	0.739879	0.522871	0.73781	0.466255	0.771896	0.533662	0.780301	0.735291	0.719416	0.77569	0.708143	0.772223	0.809426	0.551401	0.575906	0.425548	0.482315	0.527061	0.485576	0.732309	0.740077	0.733501	0.459641	0.613423	0.611319	0.739815	0.729785	0.72749	0.794314	0.857795	0.789287	0.657985	0.557082	0.484309
CpG_912	chr18	70582522	-	0.466021	0.77557	0.752236	0.473416	0.749081	0.517368	0.771485	0.49217	0.764276	0.542606	0.763516	0.498863	0.762363	0.531599	0.754606	0.475791	0.785444	0.551455	0.806511	0.742119	0.72434	0.77887	0.729924	0.815184	0.817231	0.557627	0.602901	0.449359	0.492276	0.551093	0.491593	0.75146	0.770818	0.753696	0.596269	0.559221	0.603806	0.760116	0.74891	0.741266	0.817173	0.859296	0.800094	0.666033	0.585515	0.493605
CpG_913	chr18	70582536	-	0.446087	0.762741	0.720527	0.471971	0.749291	0.494086	0.754888	0.482891	0.769541	0.514049	0.744559	0.514609	0.758769	0.47488	0.746818	0.496014	0.784181	0.543497	0.784352	0.724059	0.706365	0.756279	0.722842	0.769972	0.793339	0.544618	0.566952	0.420948	0.478034	0.530469	0.471716	0.728038	0.732779	0.729623	0.555556	0.580017	0.58908	0.743157	0.72702	0.72208	0.777046	0.846751	0.783053	0.659538	0.53899	0.496029
CpG_914	chr18	70582543	-	0.231754	0.354241	0.375915	0.193472	0.416314	0.204428	0.395149	0.198267	0.416351	0.250833	0.402068	0.207519	0.365512	0.234882	0.368213	0.215333	0.345229	0.250608	0.394941	0.374539	0.362674	0.41721	0.384135	0.420873	0.42593	0.244326	0.267666	0.17547	0.195357	0.231073	0.205295	0.383974	0.384789	0.384128	0.34322	0.2544	0.302508	0.394461	0.366662	0.404228	0.417731	0.473243	0.426335	0.361429	0.28252	0.249914
CpG_915	chr18	82902489	+	0.0333753	0.0985915	0.0712251	0.0250313	0.0371703	0.0782051	0.139665	0.0434028	0.0791557	0.0707434	0.0666667	0.0612245	0.0618557	NA	0.0729167	0.033557	0.104054	0.0646154	0.0403397	0.0564908	0.068395	0.0624028	0.0657842	0.0558184	0.0803849	0.0452089	0.0504646	0.0464602	0.0479592	0.0522745	0.0498844	0.0616923	0.0638773	0.0564195	NA	NA	0.00477327	0.0511782	0.0670088	0.0782061	0.0554072	0.106782	0.544	0.074331	0.078203	0.0505618
CpG_916	chr18	82902545	+	0.0400129	0.122337	0.11029	0.0279766	0.0631188	0.0592105	0.133872	0.0319889	0.120241	0.116481	0.129317	0.0882353	0.121118	NA	0.15074	0.0453752	0.191401	0.0157978	0.0987654	0.109184	0.0957764	0.100159	0.0918765	0.138431	0.102277	0.0699357	0.0887337	0.0442748	0.0566714	0.0538525	0.0436893	0.0971414	0.107344	0.111466	NA	NA	0.0770171	0.110596	0.112104	0.112036	0.096	0.180931	0	0.0587629	0.00173913	0.075023
CpG_917	chr18	82902560	+	0.0611995	0.106236	0.088429	0.0429975	0.079906	0.0998752	0.0910076	0.0283505	0.0910668	0.0744681	0.0768156	0.0646718	0.111671	NA	0.0704961	0.0459016	0.103448	0.039039	0.0378151	0.0816352	0.0876335	0.0990261	0.106997	0.10686	0.107728	0.0512005	0.0599008	0.0473266	0.0572289	0.0420597	0.0395683	0.0874134	0.0887671	0.0865724	NA	NA	0.0717593	0.065312	0.102775	0.0908758	0.0664911	0.0739687	0	0.0262646	0.00165289	0.049203
CpG_918	chr18	82902590	+	0.0761203	0.16686	0.150801	0.0763547	0.127934	0.146067	0.190632	0.0847603	0.196335	0.117299	0.181818	0.0729367	0.166808	NA	0.150386	0.0533333	0.156545	0.0720721	0.125786	0.167615	0.158511	0.171085	0.161738	0.280299	0.161078	0.102035	0.0991335	0.0649256	0.0596915	0.0802202	0.0807982	0.126919	0.179973	0.196106	NA	NA	0.0760369	0.153232	0.157018	0.152691	0.175889	0.299145	0.503937	0.0760976	0.0331126	0.0751566
CpG_919	chr18	84719748	+	0.234568	0.0666667	0.0434783	0	0.132075	0.0806452	0	0.075	0.219178	0.333333	0.313725	0.208333	0	NA	0	0.108696	0	0	0.12069	0.172414	0.15942	0.189189	0.0420168	NA	NA	0.031746	0.2	0.0900901	0	0	0.045977	0.225806	0	0.210526	NA	NA	NA	0.205128	0.0666667	0.416667	0	NA	NA	NA	0	0.27907
CpG_920	chr18	84719799	+	0	0	0	0	0	0	0	0	0.356643	0.015625	0	0.0842105	0	NA	0	0	0.025	0	0.00862069	0	0	0	0	NA	NA	0.031746	0	0	0	0	0.130178	0	0	0	NA	NA	NA	0	0	0	0	NA	NA	NA	0	0
CpG_921	chr18	84719818	+	0	0.0666667	0	0	0	0	0	0	0	0.09375	0	0	0.0533333	NA	0.0744681	0.0218579	0	0.0125786	0	0	0	0	0.0600858	NA	NA	0.125	0	0	0	0	0	0	0	0	NA	NA	NA	0	0.103448	0	0	NA	NA	NA	0	0.234568
CpG_922	chr18	84719863	+	0.197531	0	0	0	0	0	0	0	0.109589	0	0.0392157	0.0833333	0	NA	0.0833333	0.0217391	0	0	0	0	0.057971	0	0	NA	NA	0.0952381	0	0	0.171053	0	0	0	0	0	NA	NA	NA	0	0	0	0	NA	NA	NA	0	0
CpG_923	chr19	5783875	+	0.793335	0.876679	0.87101	0.819102	0.88108	0.852702	0.901435	0.849195	0.87009	0.851636	0.903486	0.820303	0.879978	0.678971	0.84772	0.807512	0.904988	0.815456	0.871215	0.890937	0.877835	0.876038	0.886046	0.882353	0.869412	0.853639	0.833529	0.796937	0.833996	0.781706	0.819903	0.860214	0.868723	0.859638	NA	0.822078	0.842066	0.863617	0.877878	0.872204	0.877409	0.848937	0.852866	0.841557	0.821632	0.812572
CpG_924	chr19	5783881	+	0.749875	0.826233	0.838444	0.761319	0.811743	0.775749	0.86574	0.766962	0.838807	0.771239	0.860032	0.765874	0.784414	0.718031	0.82594	0.720848	0.82832	0.726931	0.825881	0.862721	0.855056	0.840938	0.849717	0.842141	0.842434	0.786075	0.769371	0.755457	0.799227	0.759918	0.765154	0.827711	0.845348	0.829294	NA	0.880481	0.767174	0.823149	0.845903	0.841517	0.825068	0.817591	0.854515	0.74202	0.795191	0.778232
CpG_925	chr19	5783907	+	0.906109	0.912967	0.898901	0.917878	0.912222	0.871044	0.890827	0.915257	0.921366	0.930115	0.906033	0.910134	0.877345	0.899127	0.913029	0.910765	0.928259	0.882528	0.914001	0.905387	0.918255	0.915083	0.935822	0.944828	0.919172	0.873535	0.914679	0.900514	0.897358	0.911513	0.868778	0.909951	0.916027	0.899014	NA	1	0.926802	0.899628	0.916617	0.92561	0.910116	0.891861	0.894873	0.891369	0.88712	0.92514
CpG_926	chr19	5783938	+	0.91959	0.901812	0.92257	0.926652	0.91943	0.934061	0.934562	0.931071	0.906233	0.923616	0.941682	0.913814	0.874861	0.894885	0.902796	0.885132	0.915428	0.886648	0.908577	0.906733	0.903305	0.899017	0.919022	0.961394	0.927813	0.908499	0.908821	0.900511	0.917715	0.903418	0.90902	0.899014	0.906548	0.919095	NA	0.908377	0.871304	0.906266	0.922336	0.922026	0.921656	0.898584	0.934342	0.908443	0.876984	0.917576
CpG_927	chr19	5783946	+	0.913395	0.92314	0.910483	0.893148	0.929401	0.899114	0.915346	0.922209	0.919649	0.908469	0.939521	0.907216	0.904237	0.862422	0.916592	0.897933	0.909291	0.893897	0.909045	0.91425	0.912282	0.911061	0.906145	0.921756	0.905607	0.89441	0.906711	0.907983	0.894615	0.883518	0.904804	0.904475	0.908904	0.91671	NA	0.928105	0.871881	0.897623	0.92056	0.921242	0.920117	0.928318	0.887464	0.921635	0.912428	0.897401
CpG_928	chr19	6830335	-	0.259233	0.268953	0.316391	0.236842	0.323248	0.315372	0.269398	0.301413	0.291829	0.234076	0.272088	0.221653	0.273278	0.326284	0.305271	0.277126	0.357485	0.269181	0.384923	0.359258	0.377111	0.430597	0.350273	0.470923	0.424132	0.262771	0.302596	0.248788	0.262346	0.341148	0.259153	0.34391	0.326152	0.369908	0	0.174242	0.410575	0.324767	0.363152	0.389302	0.432847	0.394615	0.452778	0.457351	0.535204	0.266016
CpG_929	chr19	6830340	-	0.226056	0.349593	0.351523	0.27808	0.310427	0.301262	0.346655	0.268504	0.355919	0.261905	0.314516	0.263631	0.330572	0.419162	0.308962	0.288954	0.398727	0.28131	0.416722	0.368411	0.379112	0.463221	0.371087	0.700044	0.473779	0.263004	0.336281	0.278175	0.29036	0.342589	0.273089	0.364135	0.359117	0.382251	0	0.338346	0.335931	0.390966	0.381597	0.396667	0.520431	0.411991	0.42233	0.570549	0.488325	0.284168
CpG_930	chr19	6830372	-	0.336575	0.339529	0.431193	0.372674	0.404828	0.404517	0.398617	0.386515	0.374176	0.356518	0.420518	0.32779	0.388763	0.683582	0.363208	0.410799	0.439342	0.381533	0.468823	0.430473	0.438308	0.48337	0.427888	0.575876	0.532858	0.380733	0.431942	0.377845	0.393654	0.45106	0.344166	0.402095	0.416256	0.468999	0.39726	0.637405	0.407292	0.457085	0.438531	0.476676	0.533258	0.527043	0.637596	0.581142	0.424905	0.38583
CpG_931	chr19	6830375	-	0.430406	0.481982	0.573506	0.447869	0.466088	0.510672	0.438581	0.478261	0.446734	0.412138	0.429429	0.438378	0.457608	0.769001	0.429132	0.534476	0.522902	0.459027	0.575979	0.541597	0.574398	0.641614	0.542238	0.750273	0.636405	0.469752	0.570537	0.493503	0.498456	0.577083	0.494155	0.49489	0.495078	0.520843	1	0.742424	0.605497	0.532193	0.535809	0.561475	0.648903	0.610514	0.770703	0.735278	0.561038	0.467453
CpG_932	chr19	6830379	-	0.617095	0.630936	0.725348	0.637557	0.613627	0.705347	0.603396	0.665087	0.605873	0.640913	0.663486	0.584851	0.624715	0.90462	0.542126	0.685558	0.652093	0.644965	0.695349	0.72803	0.725897	0.789687	0.685708	0.960469	0.844216	0.676615	0.727262	0.662221	0.675168	0.76416	0.658326	0.677541	0.653065	0.68471	0.60274	0.744361	0.737616	0.683576	0.693849	0.715093	0.838193	0.841601	0.917851	0.862175	0.819822	0.65691
CpG_933	chr19	6830384	-	0.534802	0.533634	0.578897	0.552198	0.566098	0.583004	0.52987	0.556738	0.546507	0.563095	0.506042	0.52512	0.552075	0.546945	0.491559	0.556934	0.61202	0.555591	0.609028	0.624312	0.621022	0.700486	0.603569	0.76695	0.726902	0.559891	0.600773	0.566493	0.57187	0.643795	0.539684	0.586688	0.556515	0.615695	0	0.745247	0.808022	0.589895	0.599842	0.590453	0.723015	0.770577	0.746699	0.800224	0.780444	0.532623
CpG_934	chr19	6830390	-	0.612635	0.570848	0.672773	0.586347	0.621547	0.647337	0.589788	0.658021	0.586034	0.600956	0.61022	0.526197	0.596841	0.72619	0.515521	0.64989	0.686795	0.60751	0.656582	0.696886	0.701552	0.767292	0.654438	0.895483	0.828601	0.639752	0.680936	0.635653	0.644269	0.723658	0.640122	0.653963	0.621087	0.671592	0.611111	0.539623	0.835989	0.666162	0.643534	0.672134	0.784619	0.836802	0.909091	0.7968	0.826752	0.59622
CpG_935	chr19	6830397	-	0.666667	0.633739	0.705789	0.597178	0.639475	0.688668	0.630369	0.660721	0.635731	0.628994	0.627966	0.593961	0.605064	0.90583	0.562747	0.692762	0.704214	0.642184	0.69058	0.720247	0.719298	0.810489	0.676357	0.976106	0.847894	0.669429	0.74535	0.666848	0.697059	0.773618	0.633013	0.660475	0.648162	0.701349	0.611111	0.736641	0.854035	0.699809	0.672026	0.716931	0.858607	0.873467	0.949912	0.870444	0.90057	0.646327
CpG_936	chr19	6830399	-	0.593903	0.587114	0.622052	0.530351	0.559746	0.639089	0.570619	0.533544	0.565928	0.5664	0.608586	0.528502	0.545351	0.823795	0.520602	0.634926	0.633333	0.579472	0.659083	0.650469	0.636405	0.745348	0.620193	0.953347	0.766838	0.58301	0.646507	0.581855	0.596585	0.667118	0.563281	0.59502	0.584965	0.609672	1	0.737255	0.730831	0.642783	0.617605	0.635737	0.758142	0.792262	0.866667	0.809965	0.779894	0.556624
CpG_937	chr19	6830401	-	0.499648	0.504087	0.580408	0.453218	0.472322	0.559581	0.450963	0.505556	0.499026	0.486573	0.53764	0.463154	0.477714	0.783133	0.468501	0.54878	0.579242	0.508568	0.589967	0.585757	0.577137	0.661726	0.576945	0.869332	0.723718	0.50204	0.568655	0.504375	0.552021	0.595757	0.511983	0.557208	0.548851	0.567725	0.598592	0.569231	0.741653	0.599378	0.547588	0.587726	0.655533	0.703945	0.761056	0.67458	0.739313	0.511344
CpG_938	chr19	6830407	-	0.421235	0.407907	0.48326	0.396739	0.399213	0.509449	0.425606	0.429914	0.429339	0.438638	0.462926	0.368051	0.380845	0.669643	0.353725	0.414847	0.434783	0.412404	0.490704	0.471669	0.511813	0.561994	0.433131	0.646548	0.589576	0.450563	0.506787	0.406367	0.451663	0.515649	0.416809	0.429433	0.452879	0.479633	0.60274	0.601504	0.495356	0.49636	0.469804	0.512236	0.642464	0.6049	0.727336	0.665922	0.629253	0.41191
CpG_939	chr19	6830420	-	0.393477	0.447439	0.446688	0.401826	0.408661	0.490938	0.379102	0.412226	0.387991	0.356067	0.488396	0.380861	0.40933	0.592262	0.422956	0.413091	0.457233	0.405371	0.5	0.46999	0.52403	0.567377	0.48014	0.652778	0.553249	0.447555	0.502833	0.425277	0.434205	0.529309	0.452526	0.445094	0.465185	0.484593	0.60274	0.744361	0.464396	0.468907	0.468265	0.497866	0.579765	0.620452	0.801939	0.711173	0.479939	0.411983
CpG_940	chr19	6830430	-	0.556172	0.59676	0.613249	0.570912	0.54252	0.597638	0.570069	0.607506	0.536154	0.561655	0.589	0.54499	0.566165	0.869048	0.55573	0.623167	0.61824	0.572803	0.63715	0.620717	0.646266	0.754367	0.631854	0.855589	0.780339	0.586272	0.676117	0.594512	0.626302	0.687719	0.591651	0.605064	0.596108	0.641433	0.60274	0.748092	0.783721	0.632094	0.613467	0.640912	0.719518	0.820345	0.908524	0.826622	0.854315	0.581399
CpG_941	chr19	7040500	+	0.00628272	0	0.00456621	0.0027972	0	0	0	0.0141767	0.00104167	0.00368098	0	0.0134228	0	NA	0	0.00112613	0.016791	0.00409417	0	0.00970874	0	0	0	NA	0	0	0	0	0	0	0.00057241	0.000529101	0	0	NA	NA	NA	0	0.000720981	0.000660502	0	NA	NA	0	0	0.0023753
CpG_942	chr19	7040539	+	0.000526039	0.00521286	0.0138143	0.00141643	0.00789474	0	0.000518403	0	0	0.00185071	0	0	0.0066838	NA	0	0.000564972	0.000469484	0.0149948	0	0.00037594	0.00406504	0	0.000545256	NA	0	0	0	0.0190004	0	0	0.00694847	0.00134264	0	0	NA	NA	NA	0	0	0	0	NA	NA	0	0	0.00924809
CpG_943	chr19	7040541	+	0.000524659	0	0.000761035	0.0133146	0	0.00265252	0.000516262	0	0.00470711	0.00123916	0.0015361	0.0275538	0.00564103	NA	0	0	0.0149673	0.0148947	0.000594884	0.000376932	0	0.00253165	0.0092116	NA	0.165899	0.0173847	0.0018018	0.00287829	0	0.0862745	0.000872854	0.000533049	0.00114548	0	NA	NA	NA	0.0199857	0.00761145	0.000332447	0.124402	NA	NA	0	0	0.000398883
CpG_944	chr19	7040549	+	0	0	0	0	0	0	0	0.00109051	0	0	0.00620155	0	0	NA	0	0	0	0.00155682	0.0107784	0.00636228	0.0005	0	0.000269687	NA	0	0.000749625	0	0	0	0	0.0169784	0.00476569	0.00532725	0.0295359	NA	NA	NA	0.000707714	0.0111954	0.00694444	0	NA	NA	0	0	0
CpG_945	chr19	7040569	+	0	0.0164645	0.0106302	0	0	0	0.00258665	0.010923	0.000521105	0.0135052	0	0.00134228	0.00512033	NA	0	0.000564334	0.000466853	0.000512821	0.0243468	0	0.00299551	0	0.017027	NA	0	0.00149477	0	0.00570265	0	0	0	0.0141108	0	0	NA	NA	NA	0.0141443	0.0205479	0	0	NA	NA	0.0185185	0	0.00238663
CpG_946	chr19	7040590	+	0.00104493	0	0	0	0.00130378	0.0281195	0	0.00764192	0.00416667	0.0036855	0	0	0.0122951	NA	0.0014556	0.0303712	0.000931966	0.00204708	0	0.00298507	0	0	0.00645161	NA	0	0	0	0	0.00547731	0	0	0.00424628	0.00834598	0	NA	NA	NA	0.0183876	0.000724113	0	0	NA	NA	0	0	0
CpG_947	chr19	7040600	+	0.0355277	0.00866551	0	0	0.00918635	0.00176367	0.00103199	0.0163934	0	0.00123001	0	0	0	NA	0.00145773	0	0	0	0	0.00299401	0.001	0	0.00487013	NA	0	0	0.0286738	0.012215	0.00156986	0	0.00287356	0.00158898	0.000761035	0	NA	NA	NA	0	0.00144092	0.00198544	0	NA	NA	0	0	0.00637959
CpG_948	chr19	7040608	+	0	0	0	0	0	0	0	0.00545852	0.00312175	0	0	0.00134048	0	NA	0	0	0	0	0	0	0.00699301	0	0.000538793	NA	0	0	0	0	0	0	0.00114679	0.00317965	0	0.00211416	NA	NA	NA	0	0	0	0	NA	NA	0	0	0.00793021
CpG_949	chr19	10720451	-	0.79951	0.781319	0.782071	0.76721	0.770004	0.804038	0.76582	0.768097	0.822484	0.787769	0.819286	0.73404	0.785165	0.834581	0.771368	0.794848	0.76877	0.790187	0.797166	0.748379	0.735068	0.77027	0.760738	0.768238	0.7611	0.750452	0.786623	0.767818	0.747683	0.749888	0.757311	0.791288	0.767954	0.773595	0.812057	0.829897	0.753454	0.792878	0.784074	0.783614	0.779242	0.821224	0.767765	0.770093	0.785981	0.793639
CpG_950	chr19	10720472	-	0.210371	0.321618	0.296945	0.18815	0.246136	0.226123	0.247974	0.178615	0.314618	0.215733	0.346429	0.202421	0.292717	0.23654	0.282307	0.225449	0.274101	0.260613	0.299562	0.294359	0.292389	0.300869	0.293145	0.212571	0.294166	0.258891	0.22547	0.236294	0.208262	0.230747	0.222171	0.259807	0.302686	0.284702	0.221014	0.193492	0.242518	0.275058	0.301448	0.278752	0.312022	0.30252	0.340751	0.227797	0.228585	0.208901
CpG_951	chr19	10720494	-	0.218287	0.315293	0.312394	0.260022	0.306373	0.280308	0.292263	0.257752	0.330047	0.238366	0.384244	0.296071	0.334565	0.232131	0.353853	0.267414	0.338669	0.308766	0.321345	0.309327	0.335242	0.332566	0.327375	0.339119	0.344758	0.294938	0.284347	0.264891	0.263841	0.271778	0.262289	0.297409	0.333158	0.323999	0.209302	0.166013	0.292876	0.288751	0.322956	0.309055	0.346797	0.352948	0.294567	0.284644	0.264592	0.25392
CpG_952	chr19	10720513	-	0.575143	0.681957	0.64332	0.558234	0.645876	0.634031	0.65865	0.588747	0.687928	0.610486	0.691594	0.566611	0.664868	0.6	0.701064	0.59961	0.663524	0.637957	0.677599	0.618693	0.60616	0.647147	0.645925	0.623677	0.654888	0.5995	0.594653	0.595776	0.589767	0.571757	0.579177	0.654606	0.669696	0.65643	0.476667	0.547711	0.599881	0.659051	0.657187	0.666281	0.661895	0.700383	0.622996	0.590243	0.60275	0.610663
CpG_953	chr19	10720521	-	0.749596	0.731386	0.734739	0.743934	0.739956	0.774689	0.724898	0.750682	0.781692	0.755044	0.777306	0.714371	0.736	0.772144	0.77515	0.742658	0.743513	0.744819	0.765599	0.717203	0.684069	0.732805	0.733395	0.693647	0.70616	0.704824	0.740116	0.721788	0.72953	0.74297	0.733046	0.730549	0.739347	0.741042	0.834983	0.724245	0.681366	0.758778	0.759945	0.752922	0.758739	0.765686	0.781785	0.747119	0.750156	0.750029
CpG_954	chr19	34746529	+	0.062455	0.0752009	0.113646	0.0511348	0.0807483	0.0713876	0.0851305	0.0693204	0.103211	0.0912171	0.139892	0.0413081	0.0778291	0.485294	0.0892816	0.0682702	0.0796773	0.0699765	0.0706812	0.112799	0.140906	0.192717	0.120187	0.312945	0.253961	0.123909	0.0778963	0.064324	0.0893617	0.106413	0.0606149	0.0678181	0.114705	0.0921863	0.336066	0	0.23871	0.0819624	0.102293	0.114713	0.189474	0.333333	NA	0.54955	0	0.0626613
[truncated: 1,077 more rows]
[truncated: 45 more columns]
