# Supplementary material for: Hippocampal and cortical tissue-specific epigenetic clocks indicate an increased epigenetic age in a mouse model for Alzheimer’s disease
Source: Aging (Albany NY). 2020 Oct 20;12(20):20817–34. doi: 10.18632/aging.104056 (PMC7655172; doi:10.18632/aging.104056)
Supplement: Supplementary Table 3 [file aging-12-104056-s004..xlsx]

## Sheet: greatExportAll.tsv
Supplementary Table 3. The genomic regions enrichment of annotation tool (GREAT) analysis of the 175 most important age-associated CpG-sites.
# GREAT version 4.0.4	Species assembly: mm10	Association rule: Basal+extension: 5000 bp upstream, 1000 bp downstream, 1000000 bp max extension, curated regulatory domains included
# Ontology summary statistics are provided in the footer.
#
# Ontology	ID	Desc	Rank	HyperP	HyperBonfP	HyperFdrQ	RegionFoldEnrich	ExpFgRegions	FgRegionsHit	BgRegionsHit	FgSetTermCov	TermCov	NumFgGenesHit	NumBgGenesHit	TotalGenes	FgRegionNames	BgRegionNames	FgGeneNames	BgGeneNames
Ensembl Genes	3365	Rapgefl1	1	2.161916e-10	4.625419e-6	4.625419e-6	1.160571e+1	7.754801e-1	9	9	5.142857e-2	1.000000e+0	1	1	1	CpG_296,CpG_297,CpG_298,CpG_299,CpG_300,CpG_301,CpG_302,CpG_303,CpG_304	CpG_296,CpG_297,CpG_298,CpG_299,CpG_300,CpG_301,CpG_302,CpG_303,CpG_304	Rapgefl1	Rapgefl1
Ensembl Genes	15550	Klf14	2	7.976302e-9	1.706530e-4	8.532649e-5	6.963429e+0	1.723289e+0	12	20	6.857143e-2	6.000000e-1	1	1	1	CpG_1482,CpG_1483,CpG_1484,CpG_1485,CpG_1486,CpG_1487,CpG_1488,CpG_1492,CpG_1493,CpG_1495,CpG_1496,CpG_1497	CpG_1482,CpG_1483,CpG_1484,CpG_1485,CpG_1486,CpG_1487,CpG_1488,CpG_1489,CpG_1490,CpG_1491,CpG_1492,CpG_1493,CpG_1494,CpG_1495,CpG_1496,CpG_1497,CpG_1498,CpG_1499,CpG_1500,CpG_1501	Klf14	Klf14
Ensembl Genes	10149	Phpt1	3	1.011939e-7	2.165043e-3	7.216812e-4	9.284571e+0	8.616445e-1	8	10	4.571429e-2	8.000000e-1	1	1	1	CpG_990,CpG_991,CpG_994,CpG_995,CpG_996,CpG_997,CpG_998,CpG_999	CpG_990,CpG_991,CpG_992,CpG_993,CpG_994,CpG_995,CpG_996,CpG_997,CpG_998,CpG_999	Phpt1	Phpt1
Ensembl Genes	10327	Angptl2	4	4.505555e-6	9.639635e-2	2.409909e-2	1.160571e+1	4.308223e-1	5	5	2.857143e-2	1.000000e+0	1	1	1	CpG_1024,CpG_1025,CpG_1026,CpG_1027,CpG_1028	CpG_1024,CpG_1025,CpG_1026,CpG_1027,CpG_1028	Angptl2	Angptl2
Ensembl Genes	11996	Stoml3	5	2.542457e-5	5.439587e-1	1.087917e-1	7.737143e+0	7.754801e-1	6	9	3.428571e-2	6.666667e-1	1	1	1	CpG_1143,CpG_1144,CpG_1145,CpG_1146,CpG_1147,CpG_1149	CpG_1141,CpG_1142,CpG_1143,CpG_1144,CpG_1145,CpG_1146,CpG_1147,CpG_1148,CpG_1149	Stoml3	Stoml3
Ensembl Genes	11995	Proser1	5	2.542457e-5	5.439587e-1	1.087917e-1	7.737143e+0	7.754801e-1	6	9	3.428571e-2	6.666667e-1	1	1	1	CpG_1143,CpG_1144,CpG_1145,CpG_1146,CpG_1147,CpG_1149	CpG_1141,CpG_1142,CpG_1143,CpG_1144,CpG_1145,CpG_1146,CpG_1147,CpG_1148,CpG_1149	Proser1	Proser1
Ensembl Genes	19321	Nol3	7	3.211793e-5	6.871631e-1	9.816616e-2	5.461513e+0	1.464796e+0	8	17	4.571429e-2	4.705882e-1	1	1	1	CpG_1815,CpG_1816,CpG_1818,CpG_1820,CpG_1822,CpG_1824,CpG_1826,CpG_1828	CpG_1815,CpG_1816,CpG_1817,CpG_1818,CpG_1819,CpG_1820,CpG_1821,CpG_1822,CpG_1823,CpG_1824,CpG_1825,CpG_1826,CpG_1827,CpG_1828,CpG_1829,CpG_1830,CpG_1831	Nol3	Nol3
Ensembl Genes	19320	Hsf4	7	3.211793e-5	6.871631e-1	9.816616e-2	5.461513e+0	1.464796e+0	8	17	4.571429e-2	4.705882e-1	1	1	1	CpG_1815,CpG_1816,CpG_1818,CpG_1820,CpG_1822,CpG_1824,CpG_1826,CpG_1828	CpG_1815,CpG_1816,CpG_1817,CpG_1818,CpG_1819,CpG_1820,CpG_1821,CpG_1822,CpG_1823,CpG_1824,CpG_1825,CpG_1826,CpG_1827,CpG_1828,CpG_1829,CpG_1830,CpG_1831	Hsf4	Hsf4
Ensembl Genes	1796	Celf5	9	8.185791e-5	1.000000e+0	1.945944e-1	8.289796e+0	6.031512e-1	5	7	2.857143e-2	7.142857e-1	1	1	1	CpG_101,CpG_102,CpG_103,CpG_105,CpG_106	CpG_101,CpG_102,CpG_103,CpG_104,CpG_105,CpG_106,CpG_107	Celf5	Celf5
Ensembl Genes	8541	Plin4	10	2.030775e-4	1.000000e+0	4.344843e-1	7.253571e+0	6.893156e-1	5	8	2.857143e-2	6.250000e-1	1	1	1	CpG_861,CpG_862,CpG_863,CpG_864,CpG_865	CpG_858,CpG_859,CpG_860,CpG_861,CpG_862,CpG_863,CpG_864,CpG_865	Plin4	Plin4
Ensembl Genes	8540	Hdgfl2	10	2.030775e-4	1.000000e+0	4.344843e-1	7.253571e+0	6.893156e-1	5	8	2.857143e-2	6.250000e-1	1	1	1	CpG_861,CpG_862,CpG_863,CpG_864,CpG_865	CpG_858,CpG_859,CpG_860,CpG_861,CpG_862,CpG_863,CpG_864,CpG_865	Hdgfl2	Hdgfl2
Ensembl Genes	15373	Gm6408	10	2.030775e-4	1.000000e+0	4.344843e-1	7.253571e+0	6.893156e-1	5	8	2.857143e-2	6.250000e-1	1	1	1	CpG_1471,CpG_1473,CpG_1475,CpG_1477,CpG_1478	CpG_1471,CpG_1472,CpG_1473,CpG_1474,CpG_1475,CpG_1476,CpG_1477,CpG_1478	Gm6408	Gm6408
Ensembl Genes	15372	Wasf3	10	2.030775e-4	1.000000e+0	4.344843e-1	7.253571e+0	6.893156e-1	5	8	2.857143e-2	6.250000e-1	1	1	1	CpG_1471,CpG_1473,CpG_1475,CpG_1477,CpG_1478	CpG_1471,CpG_1472,CpG_1473,CpG_1474,CpG_1475,CpG_1476,CpG_1477,CpG_1478	Wasf3	Wasf3
Ensembl Genes	8871	Gm35060	14	2.490175e-4	1.000000e+0	3.805521e-1	9.284571e+0	4.308223e-1	4	5	2.285714e-2	8.000000e-1	1	1	1	CpG_890,CpG_891,CpG_892,CpG_894	CpG_890,CpG_891,CpG_892,CpG_893,CpG_894	Gm35060	Gm35060
Ensembl Genes	8870	Bin1	14	2.490175e-4	1.000000e+0	3.805521e-1	9.284571e+0	4.308223e-1	4	5	2.285714e-2	8.000000e-1	1	1	1	CpG_890,CpG_891,CpG_892,CpG_894	CpG_890,CpG_891,CpG_892,CpG_893,CpG_894	Bin1	Bin1
Ensembl Genes	17402	Tsks	14	2.490175e-4	1.000000e+0	3.805521e-1	9.284571e+0	4.308223e-1	4	5	2.285714e-2	8.000000e-1	1	1	1	CpG_1640,CpG_1641,CpG_1642,CpG_1644	CpG_1640,CpG_1641,CpG_1642,CpG_1643,CpG_1644	Tsks	Tsks
Ensembl Genes	17403	Cpt1c	14	2.490175e-4	1.000000e+0	3.805521e-1	9.284571e+0	4.308223e-1	4	5	2.285714e-2	8.000000e-1	1	1	1	CpG_1640,CpG_1641,CpG_1642,CpG_1644	CpG_1640,CpG_1641,CpG_1642,CpG_1643,CpG_1644	Cpt1c	Cpt1c
Ensembl Genes	3168	Bcas3	18	6.297170e-4	1.000000e+0	7.484886e-1	1.160571e+1	2.584934e-1	3	3	1.714286e-2	1.000000e+0	1	1	1	CpG_257,CpG_258,CpG_259	CpG_257,CpG_258,CpG_259	Bcas3	Bcas3
Ensembl Genes	3169	Tbx2	18	6.297170e-4	1.000000e+0	7.484886e-1	1.160571e+1	2.584934e-1	3	3	1.714286e-2	1.000000e+0	1	1	1	CpG_257,CpG_258,CpG_259	CpG_257,CpG_258,CpG_259	Tbx2	Tbx2
Ensembl Genes	13491	Faah	18	6.297170e-4	1.000000e+0	7.484886e-1	1.160571e+1	2.584934e-1	3	3	1.714286e-2	1.000000e+0	1	1	1	CpG_1307,CpG_1308,CpG_1309	CpG_1307,CpG_1308,CpG_1309	Faah	Faah
Ensembl Genes	2216	Sfi1	18	6.297170e-4	1.000000e+0	7.484886e-1	1.160571e+1	2.584934e-1	3	3	1.714286e-2	1.000000e+0	1	1	1	CpG_147,CpG_148,CpG_149	CpG_147,CpG_148,CpG_149	Sfi1	Sfi1
Ensembl Genes	13490	Dmbx1	18	6.297170e-4	1.000000e+0	7.484886e-1	1.160571e+1	2.584934e-1	3	3	1.714286e-2	1.000000e+0	1	1	1	CpG_1307,CpG_1308,CpG_1309	CpG_1307,CpG_1308,CpG_1309	Dmbx1	Dmbx1
Ensembl Genes	1148	Lyplal1	18	6.297170e-4	1.000000e+0	7.484886e-1	1.160571e+1	2.584934e-1	3	3	1.714286e-2	1.000000e+0	1	1	1	CpG_40,CpG_41,CpG_42	CpG_40,CpG_41,CpG_42	Lyplal1	Lyplal1
Ensembl Genes	1149	Tgfb2	18	6.297170e-4	1.000000e+0	7.484886e-1	1.160571e+1	2.584934e-1	3	3	1.714286e-2	1.000000e+0	1	1	1	CpG_40,CpG_41,CpG_42	CpG_40,CpG_41,CpG_42	Tgfb2	Tgfb2
Ensembl Genes	15551	Mkln1	25	7.912564e-4	1.000000e+0	6.771572e-1	5.802857e+0	8.616445e-1	5	10	2.857143e-2	5.000000e-1	1	1	1	CpG_1492,CpG_1493,CpG_1495,CpG_1496,CpG_1497	CpG_1492,CpG_1493,CpG_1494,CpG_1495,CpG_1496,CpG_1497,CpG_1498,CpG_1499,CpG_1500,CpG_1501	Mkln1	Mkln1
Ensembl Genes	8424	Mymx	26	1.350117e-3	1.000000e+0	1.000000e+0	5.275325e+0	9.478090e-1	5	11	2.857143e-2	4.545455e-1	1	1	1	CpG_838,CpG_840,CpG_842,CpG_845,CpG_847	CpG_837,CpG_838,CpG_839,CpG_840,CpG_841,CpG_842,CpG_843,CpG_844,CpG_845,CpG_846,CpG_847	Mymx	Mymx
Ensembl Genes	19375	Has3	27	1.516645e-3	1.000000e+0	1.000000e+0	6.631837e+0	6.031512e-1	4	7	2.285714e-2	5.714286e-1	1	1	1	CpG_1840,CpG_1841,CpG_1842,CpG_1843	CpG_1839,CpG_1840,CpG_1841,CpG_1842,CpG_1843,CpG_1844,CpG_1845	Has3	Has3
Ensembl Genes	10070	Spag6	27	1.516645e-3	1.000000e+0	1.000000e+0	6.631837e+0	6.031512e-1	4	7	2.285714e-2	5.714286e-1	1	1	1	CpG_983,CpG_985,CpG_986,CpG_987	CpG_983,CpG_984,CpG_985,CpG_986,CpG_987,CpG_988,CpG_989	Spag6	Spag6
Ensembl Genes	10071	Pip4k2a	27	1.516645e-3	1.000000e+0	1.000000e+0	6.631837e+0	6.031512e-1	4	7	2.285714e-2	5.714286e-1	1	1	1	CpG_983,CpG_985,CpG_986,CpG_987	CpG_983,CpG_984,CpG_985,CpG_986,CpG_987,CpG_988,CpG_989	Pip4k2a	Pip4k2a
Ensembl Genes	2363	Bcl11a	30	2.358644e-3	1.000000e+0	1.000000e+0	8.704286e+0	3.446578e-1	3	4	1.714286e-2	7.500000e-1	1	1	1	CpG_161,CpG_162,CpG_164	CpG_161,CpG_162,CpG_163,CpG_164	Bcl11a	Bcl11a
Ensembl Genes	4976	BC051665	31	5.523084e-3	1.000000e+0	1.000000e+0	6.963429e+0	4.308223e-1	3	5	1.714286e-2	6.000000e-1	1	1	1	CpG_501,CpG_502,CpG_504	CpG_500,CpG_501,CpG_502,CpG_503,CpG_504	BC051665	BC051665
Ensembl Genes	4975	Dapk1	31	5.523084e-3	1.000000e+0	1.000000e+0	6.963429e+0	4.308223e-1	3	5	1.714286e-2	6.000000e-1	1	1	1	CpG_501,CpG_502,CpG_504	CpG_500,CpG_501,CpG_502,CpG_503,CpG_504	Dapk1	Dapk1
Ensembl Genes	1795	Nfic	33	8.933871e-3	1.000000e+0	1.000000e+0	3.626786e+0	1.378631e+0	5	16	2.857143e-2	3.125000e-1	1	1	1	CpG_101,CpG_102,CpG_103,CpG_105,CpG_106	CpG_100,CpG_101,CpG_102,CpG_103,CpG_104,CpG_105,CpG_106,CpG_107,CpG_92,CpG_93,CpG_94,CpG_95,CpG_96,CpG_97,CpG_98,CpG_99	Nfic	Nfic
Ensembl Genes	3321	Epop	34	2.050643e-2	1.000000e+0	1.000000e+0	3.570989e+0	1.120138e+0	4	13	2.285714e-2	3.076923e-1	1	1	1	CpG_282,CpG_283,CpG_287,CpG_289	CpG_280,CpG_281,CpG_282,CpG_283,CpG_284,CpG_285,CpG_286,CpG_287,CpG_288,CpG_289,CpG_290,CpG_291,CpG_292	Epop	Epop
Ensembl Genes	5634	Opn4	35	2.089714e-2	1.000000e+0	1.000000e+0	7.737143e+0	2.584934e-1	2	3	1.142857e-2	6.666667e-1	1	1	1	CpG_548,CpG_550	CpG_548,CpG_549,CpG_550	Opn4	Opn4
Ensembl Genes	17266	Kctd15	35	2.089714e-2	1.000000e+0	1.000000e+0	7.737143e+0	2.584934e-1	2	3	1.142857e-2	6.666667e-1	1	1	1	CpG_1636,CpG_1637	CpG_1635,CpG_1636,CpG_1637	Kctd15	Kctd15
Ensembl Genes	17265	Lsm14a	35	2.089714e-2	1.000000e+0	1.000000e+0	7.737143e+0	2.584934e-1	2	3	1.142857e-2	6.666667e-1	1	1	1	CpG_1636,CpG_1637	CpG_1635,CpG_1636,CpG_1637	Lsm14a	Lsm14a
Ensembl Genes	1710	Abca7	35	2.089714e-2	1.000000e+0	1.000000e+0	7.737143e+0	2.584934e-1	2	3	1.142857e-2	6.666667e-1	1	1	1	CpG_80,CpG_82	CpG_80,CpG_81,CpG_82	Abca7	Abca7
Ensembl Genes	1711	Arhgap45	35	2.089714e-2	1.000000e+0	1.000000e+0	7.737143e+0	2.584934e-1	2	3	1.142857e-2	6.666667e-1	1	1	1	CpG_80,CpG_82	CpG_80,CpG_81,CpG_82	Arhgap45	Arhgap45
Ensembl Genes	20269	Rbpms2	40	2.546022e-2	1.000000e+0	1.000000e+0	4.352143e+0	6.893156e-1	3	8	1.714286e-2	3.750000e-1	1	1	1	CpG_1972,CpG_1977,CpG_1978	CpG_1971,CpG_1972,CpG_1973,CpG_1974,CpG_1975,CpG_1976,CpG_1977,CpG_1978	Rbpms2	Rbpms2
Ensembl Genes	334	Tnp1	41	3.943563e-2	1.000000e+0	1.000000e+0	5.802857e+0	3.446578e-1	2	4	1.142857e-2	5.000000e-1	1	1	1	CpG_21,CpG_22	CpG_19,CpG_20,CpG_21,CpG_22	Tnp1	Tnp1
Ensembl Genes	9518	Cd5	42	6.204400e-2	1.000000e+0	1.000000e+0	4.642286e+0	4.308223e-1	2	5	1.142857e-2	4.000000e-1	1	1	1	CpG_949,CpG_953	CpG_949,CpG_950,CpG_951,CpG_952,CpG_953	Cd5	Cd5
Ensembl Genes	16010	Rpn1	42	6.204400e-2	1.000000e+0	1.000000e+0	4.642286e+0	4.308223e-1	2	5	1.142857e-2	4.000000e-1	1	1	1	CpG_1539,CpG_1540	CpG_1539,CpG_1540,CpG_1541,CpG_1542,CpG_1543	Rpn1	Rpn1
Ensembl Genes	9517	Vps37c	42	6.204400e-2	1.000000e+0	1.000000e+0	4.642286e+0	4.308223e-1	2	5	1.142857e-2	4.000000e-1	1	1	1	CpG_949,CpG_953	CpG_949,CpG_950,CpG_951,CpG_952,CpG_953	Vps37c	Vps37c
Ensembl Genes	16011	Gata2	42	6.204400e-2	1.000000e+0	1.000000e+0	4.642286e+0	4.308223e-1	2	5	1.142857e-2	4.000000e-1	1	1	1	CpG_1539,CpG_1540	CpG_1539,CpG_1540,CpG_1541,CpG_1542,CpG_1543	Gata2	Gata2
Ensembl Genes	3320	Srcin1	46	1.460672e-1	1.000000e+0	1.000000e+0	1.934286e+0	2.067947e+0	4	24	2.285714e-2	1.666667e-1	1	1	1	CpG_282,CpG_283,CpG_287,CpG_289	CpG_269,CpG_270,CpG_271,CpG_272,CpG_273,CpG_274,CpG_275,CpG_276,CpG_277,CpG_278,CpG_279,CpG_280,CpG_281,CpG_282,CpG_283,CpG_284,CpG_285,CpG_286,CpG_287,CpG_288,CpG_289,CpG_290,CpG_291,CpG_292	Srcin1	Srcin1
Ensembl Genes	9199	Mbd2	47	1.465242e-1	1.000000e+0	1.000000e+0	2.901429e+0	6.893156e-1	2	8	1.142857e-2	2.500000e-1	1	1	1	CpG_907,CpG_914	CpG_907,CpG_908,CpG_909,CpG_910,CpG_911,CpG_912,CpG_913,CpG_914	Mbd2	Mbd2
Ensembl Genes	335	Tns1	47	1.465242e-1	1.000000e+0	1.000000e+0	2.901429e+0	6.893156e-1	2	8	1.142857e-2	2.500000e-1	1	1	1	CpG_21,CpG_22	CpG_19,CpG_20,CpG_21,CpG_22,CpG_23,CpG_24,CpG_25,CpG_26	Tns1	Tns1
Ensembl Genes	6761	7530416G11Rik	49	1.649434e-1	1.000000e+0	1.000000e+0	5.802857e+0	1.723289e-1	1	2	5.714286e-3	5.000000e-1	1	1	1	CpG_643	CpG_643,CpG_644	7530416G11Rik	7530416G11Rik
Ensembl Genes	3486	Cntd1	49	1.649434e-1	1.000000e+0	1.000000e+0	5.802857e+0	1.723289e-1	1	2	5.714286e-3	5.000000e-1	1	1	1	CpG_315	CpG_315,CpG_316	Cntd1	Cntd1
Ensembl Genes	8488	Foxp4	49	1.649434e-1	1.000000e+0	1.000000e+0	5.802857e+0	1.723289e-1	1	2	5.714286e-3	5.000000e-1	1	1	1	CpG_851	CpG_851,CpG_852	Foxp4	Foxp4
Ensembl Genes	9915	Neurl1a	49	1.649434e-1	1.000000e+0	1.000000e+0	5.802857e+0	1.723289e-1	1	2	5.714286e-3	5.000000e-1	1	1	1	CpG_970	CpG_970,CpG_971	Neurl1a	Neurl1a
Ensembl Genes	3484	Wnk4	49	1.649434e-1	1.000000e+0	1.000000e+0	5.802857e+0	1.723289e-1	1	2	5.714286e-3	5.000000e-1	1	1	1	CpG_315	CpG_315,CpG_316	Wnk4	Wnk4
Ensembl Genes	9916	Sh3pxd2a	49	1.649434e-1	1.000000e+0	1.000000e+0	5.802857e+0	1.723289e-1	1	2	5.714286e-3	5.000000e-1	1	1	1	CpG_970	CpG_970,CpG_971	Sh3pxd2a	Sh3pxd2a
Ensembl Genes	15095	Ubc	49	1.649434e-1	1.000000e+0	1.000000e+0	5.802857e+0	1.723289e-1	1	2	5.714286e-3	5.000000e-1	1	1	1	CpG_1456	CpG_1456,CpG_1457	Ubc	Ubc
Ensembl Genes	13755	Dnajc8	49	1.649434e-1	1.000000e+0	1.000000e+0	5.802857e+0	1.723289e-1	1	2	5.714286e-3	5.000000e-1	1	1	1	CpG_1322	CpG_1322,CpG_1323	Dnajc8	Dnajc8
Ensembl Genes	13754	Atpif1	49	1.649434e-1	1.000000e+0	1.000000e+0	5.802857e+0	1.723289e-1	1	2	5.714286e-3	5.000000e-1	1	1	1	CpG_1322	CpG_1322,CpG_1323	Atpif1	Atpif1
Ensembl Genes	1721	Efna2	49	1.649434e-1	1.000000e+0	1.000000e+0	5.802857e+0	1.723289e-1	1	2	5.714286e-3	5.000000e-1	1	1	1	CpG_84	CpG_83,CpG_84	Efna2	Efna2
Ensembl Genes	1722	Mum1	49	1.649434e-1	1.000000e+0	1.000000e+0	5.802857e+0	1.723289e-1	1	2	5.714286e-3	5.000000e-1	1	1	1	CpG_84	CpG_83,CpG_84	Mum1	Mum1
Ensembl Genes	3245	Epn3	49	1.649434e-1	1.000000e+0	1.000000e+0	5.802857e+0	1.723289e-1	1	2	5.714286e-3	5.000000e-1	1	1	1	CpG_260	CpG_260,CpG_261	Epn3	Epn3
Ensembl Genes	7252	Dgkg	61	1.781560e-1	1.000000e+0	1.000000e+0	2.579048e+0	7.754801e-1	2	9	1.142857e-2	2.222222e-1	1	1	1	CpG_723,CpG_730	CpG_722,CpG_723,CpG_724,CpG_725,CpG_726,CpG_727,CpG_728,CpG_729,CpG_730	Dgkg	Dgkg
Ensembl Genes	7251	Etv5	61	1.781560e-1	1.000000e+0	1.000000e+0	2.579048e+0	7.754801e-1	2	9	1.142857e-2	2.222222e-1	1	1	1	CpG_723,CpG_730	CpG_722,CpG_723,CpG_724,CpG_725,CpG_726,CpG_727,CpG_728,CpG_729,CpG_730	Etv5	Etv5
Ensembl Genes	19392	Pmfbp1	63	2.106970e-1	1.000000e+0	1.000000e+0	2.321143e+0	8.616445e-1	2	10	1.142857e-2	2.000000e-1	1	1	1	CpG_1846,CpG_1848	CpG_1846,CpG_1847,CpG_1848,CpG_1849,CpG_1850,CpG_1851,CpG_1852,CpG_1853,CpG_1854,CpG_1855	Pmfbp1	Pmfbp1
Ensembl Genes	19391	Zfhx3	63	2.106970e-1	1.000000e+0	1.000000e+0	2.321143e+0	8.616445e-1	2	10	1.142857e-2	2.000000e-1	1	1	1	CpG_1846,CpG_1848	CpG_1846,CpG_1847,CpG_1848,CpG_1849,CpG_1850,CpG_1851,CpG_1852,CpG_1853,CpG_1854,CpG_1855	Zfhx3	Zfhx3
Ensembl Genes	10266	Cstad	63	2.106970e-1	1.000000e+0	1.000000e+0	2.321143e+0	8.616445e-1	2	10	1.142857e-2	2.000000e-1	1	1	1	CpG_1014,CpG_1023	CpG_1014,CpG_1015,CpG_1016,CpG_1017,CpG_1018,CpG_1019,CpG_1020,CpG_1021,CpG_1022,CpG_1023	Cstad	Cstad
Ensembl Genes	10267	1700001O22Rik	63	2.106970e-1	1.000000e+0	1.000000e+0	2.321143e+0	8.616445e-1	2	10	1.142857e-2	2.000000e-1	1	1	1	CpG_1014,CpG_1023	CpG_1014,CpG_1015,CpG_1016,CpG_1017,CpG_1018,CpG_1019,CpG_1020,CpG_1021,CpG_1022,CpG_1023	1700001O22Rik	1700001O22Rik
Ensembl Genes	6760	Atxn10	67	2.369665e-1	1.000000e+0	1.000000e+0	3.868571e+0	2.584934e-1	1	3	5.714286e-3	3.333333e-1	1	1	1	CpG_640	CpG_640,CpG_641,CpG_642	Atxn10	Atxn10
Ensembl Genes	6759	Fbln1	67	2.369665e-1	1.000000e+0	1.000000e+0	3.868571e+0	2.584934e-1	1	3	5.714286e-3	3.333333e-1	1	1	1	CpG_640	CpG_640,CpG_641,CpG_642	Fbln1	Fbln1
Ensembl Genes	15437	Pon2	67	2.369665e-1	1.000000e+0	1.000000e+0	3.868571e+0	2.584934e-1	1	3	5.714286e-3	3.333333e-1	1	1	1	CpG_1480	CpG_1479,CpG_1480,CpG_1481	Pon2	Pon2
Ensembl Genes	6040	Pbk	67	2.369665e-1	1.000000e+0	1.000000e+0	3.868571e+0	2.584934e-1	1	3	5.714286e-3	3.333333e-1	1	1	1	CpG_566	CpG_564,CpG_565,CpG_566	Pbk	Pbk
Ensembl Genes	6039	Scara5	67	2.369665e-1	1.000000e+0	1.000000e+0	3.868571e+0	2.584934e-1	1	3	5.714286e-3	3.333333e-1	1	1	1	CpG_566	CpG_564,CpG_565,CpG_566	Scara5	Scara5
Ensembl Genes	4431	Ankrd9	72	3.028101e-1	1.000000e+0	1.000000e+0	2.901429e+0	3.446578e-1	1	4	5.714286e-3	2.500000e-1	1	1	1	CpG_476	CpG_475,CpG_476,CpG_477,CpG_478	Ankrd9	Ankrd9
Ensembl Genes	378	Ptprn	72	3.028101e-1	1.000000e+0	1.000000e+0	2.901429e+0	3.446578e-1	1	4	5.714286e-3	2.500000e-1	1	1	1	CpG_27	CpG_27,CpG_28,CpG_29,CpG_30	Ptprn	Ptprn
Ensembl Genes	4432	Rcor1	72	3.028101e-1	1.000000e+0	1.000000e+0	2.901429e+0	3.446578e-1	1	4	5.714286e-3	2.500000e-1	1	1	1	CpG_476	CpG_475,CpG_476,CpG_477,CpG_478	Rcor1	Rcor1
Ensembl Genes	6740	Efcab6	72	3.028101e-1	1.000000e+0	1.000000e+0	2.901429e+0	3.446578e-1	1	4	5.714286e-3	2.500000e-1	1	1	1	CpG_629	CpG_629,CpG_630,CpG_631,CpG_632	Efcab6	Efcab6
Ensembl Genes	7620	Sod1	72	3.028101e-1	1.000000e+0	1.000000e+0	2.901429e+0	3.446578e-1	1	4	5.714286e-3	2.500000e-1	1	1	1	CpG_766	CpG_763,CpG_764,CpG_765,CpG_766	Sod1	Sod1
Ensembl Genes	7619	Tiam1	72	3.028101e-1	1.000000e+0	1.000000e+0	2.901429e+0	3.446578e-1	1	4	5.714286e-3	2.500000e-1	1	1	1	CpG_766	CpG_763,CpG_764,CpG_765,CpG_766	Tiam1	Tiam1
Ensembl Genes	6739	Mpped1	72	3.028101e-1	1.000000e+0	1.000000e+0	2.901429e+0	3.446578e-1	1	4	5.714286e-3	2.500000e-1	1	1	1	CpG_629	CpG_629,CpG_630,CpG_631,CpG_632	Mpped1	Mpped1
Ensembl Genes	377	Dnajb2	72	3.028101e-1	1.000000e+0	1.000000e+0	2.901429e+0	3.446578e-1	1	4	5.714286e-3	2.500000e-1	1	1	1	CpG_27	CpG_27,CpG_28,CpG_29,CpG_30	Dnajb2	Dnajb2
Ensembl Genes	13577	Ccdc30	72	3.028101e-1	1.000000e+0	1.000000e+0	2.901429e+0	3.446578e-1	1	4	5.714286e-3	2.500000e-1	1	1	1	CpG_1311	CpG_1310,CpG_1311,CpG_1312,CpG_1313	Ccdc30	Ccdc30
Ensembl Genes	3122	Slfn5	72	3.028101e-1	1.000000e+0	1.000000e+0	2.901429e+0	3.446578e-1	1	4	5.714286e-3	2.500000e-1	1	1	1	CpG_255	CpG_253,CpG_254,CpG_255,CpG_256	Slfn5	Slfn5
Ensembl Genes	17541	Atp10a	72	3.028101e-1	1.000000e+0	1.000000e+0	2.901429e+0	3.446578e-1	1	4	5.714286e-3	2.500000e-1	1	1	1	CpG_1660	CpG_1659,CpG_1660,CpG_1661,CpG_1662	Atp10a	Atp10a
Ensembl Genes	17542	Ube3a	72	3.028101e-1	1.000000e+0	1.000000e+0	2.901429e+0	3.446578e-1	1	4	5.714286e-3	2.500000e-1	1	1	1	CpG_1660	CpG_1659,CpG_1660,CpG_1661,CpG_1662	Ube3a	Ube3a
Ensembl Genes	3121	Unc45b	72	3.028101e-1	1.000000e+0	1.000000e+0	2.901429e+0	3.446578e-1	1	4	5.714286e-3	2.500000e-1	1	1	1	CpG_255	CpG_253,CpG_254,CpG_255,CpG_256	Unc45b	Unc45b
Ensembl Genes	2922	Smtnl2	72	3.028101e-1	1.000000e+0	1.000000e+0	2.901429e+0	3.446578e-1	1	4	5.714286e-3	2.500000e-1	1	1	1	CpG_230	CpG_230,CpG_231,CpG_232,CpG_233	Smtnl2	Smtnl2
Ensembl Genes	9422	Rps6ka4	86	3.101795e-1	1.000000e+0	1.000000e+0	1.785495e+0	1.120138e+0	2	13	1.142857e-2	1.538462e-1	1	1	1	CpG_932,CpG_938	CpG_928,CpG_929,CpG_930,CpG_931,CpG_932,CpG_933,CpG_934,CpG_935,CpG_936,CpG_937,CpG_938,CpG_939,CpG_940	Rps6ka4	Rps6ka4
Ensembl Genes	12016	Mab21l1	86	3.101795e-1	1.000000e+0	1.000000e+0	1.785495e+0	1.120138e+0	2	13	1.142857e-2	1.538462e-1	1	1	1	CpG_1159,CpG_1160	CpG_1150,CpG_1151,CpG_1152,CpG_1153,CpG_1154,CpG_1155,CpG_1156,CpG_1157,CpG_1158,CpG_1159,CpG_1160,CpG_1161,CpG_1162	Mab21l1	Mab21l1
Ensembl Genes	9421	Slc22a12	86	3.101795e-1	1.000000e+0	1.000000e+0	1.785495e+0	1.120138e+0	2	13	1.142857e-2	1.538462e-1	1	1	1	CpG_932,CpG_938	CpG_928,CpG_929,CpG_930,CpG_931,CpG_932,CpG_933,CpG_934,CpG_935,CpG_936,CpG_937,CpG_938,CpG_939,CpG_940	Slc22a12	Slc22a12
Ensembl Genes	3769	Engase	89	3.630016e-1	1.000000e+0	1.000000e+0	2.321143e+0	4.308223e-1	1	5	5.714286e-3	2.000000e-1	1	1	1	CpG_358	CpG_358,CpG_359,CpG_360,CpG_361,CpG_362	Engase	Engase
Ensembl Genes	9385	Scyl1	89	3.630016e-1	1.000000e+0	1.000000e+0	2.321143e+0	4.308223e-1	1	5	5.714286e-3	2.000000e-1	1	1	1	CpG_927	CpG_923,CpG_924,CpG_925,CpG_926,CpG_927	Scyl1	Scyl1
Ensembl Genes	3768	C1qtnf1	89	3.630016e-1	1.000000e+0	1.000000e+0	2.321143e+0	4.308223e-1	1	5	5.714286e-3	2.000000e-1	1	1	1	CpG_358	CpG_358,CpG_359,CpG_360,CpG_361,CpG_362	C1qtnf1	C1qtnf1
Ensembl Genes	9386	Frmd8	89	3.630016e-1	1.000000e+0	1.000000e+0	2.321143e+0	4.308223e-1	1	5	5.714286e-3	2.000000e-1	1	1	1	CpG_927	CpG_923,CpG_924,CpG_925,CpG_926,CpG_927	Frmd8	Frmd8
Ensembl Genes	13281	Ifna13	89	3.630016e-1	1.000000e+0	1.000000e+0	2.321143e+0	4.308223e-1	1	5	5.714286e-3	2.000000e-1	1	1	1	CpG_1284	CpG_1284,CpG_1285,CpG_1286,CpG_1287,CpG_1288	Ifna13	Ifna13
Ensembl Genes	19760	Kank2	89	3.630016e-1	1.000000e+0	1.000000e+0	2.321143e+0	4.308223e-1	1	5	5.714286e-3	2.000000e-1	1	1	1	CpG_1927	CpG_1925,CpG_1926,CpG_1927,CpG_1928,CpG_1929	Kank2	Kank2
Ensembl Genes	13280	C87499	89	3.630016e-1	1.000000e+0	1.000000e+0	2.321143e+0	4.308223e-1	1	5	5.714286e-3	2.000000e-1	1	1	1	CpG_1284	CpG_1284,CpG_1285,CpG_1286,CpG_1287,CpG_1288	C87499	C87499
Ensembl Genes	19759	Spc24	89	3.630016e-1	1.000000e+0	1.000000e+0	2.321143e+0	4.308223e-1	1	5	5.714286e-3	2.000000e-1	1	1	1	CpG_1927	CpG_1925,CpG_1926,CpG_1927,CpG_1928,CpG_1929	Spc24	Spc24
Ensembl Genes	2480	Irgm1	97	4.180237e-1	1.000000e+0	1.000000e+0	1.934286e+0	5.169867e-1	1	6	5.714286e-3	1.666667e-1	1	1	1	CpG_184	CpG_184,CpG_185,CpG_186,CpG_187,CpG_188,CpG_189	Irgm1	Irgm1
Ensembl Genes	2774	Gas7	97	4.180237e-1	1.000000e+0	1.000000e+0	1.934286e+0	5.169867e-1	1	6	5.714286e-3	1.666667e-1	1	1	1	CpG_222	CpG_218,CpG_219,CpG_220,CpG_221,CpG_222,CpG_223	Gas7	Gas7
Ensembl Genes	2479	Trim7	97	4.180237e-1	1.000000e+0	1.000000e+0	1.934286e+0	5.169867e-1	1	6	5.714286e-3	1.666667e-1	1	1	1	CpG_184	CpG_184,CpG_185,CpG_186,CpG_187,CpG_188,CpG_189	Trim7	Trim7
Ensembl Genes	3009	Rph3al	97	4.180237e-1	1.000000e+0	1.000000e+0	1.934286e+0	5.169867e-1	1	6	5.714286e-3	1.666667e-1	1	1	1	CpG_235	CpG_234,CpG_235,CpG_236,CpG_237,CpG_238,CpG_239	Rph3al	Rph3al
Ensembl Genes	2775	Rcvrn	97	4.180237e-1	1.000000e+0	1.000000e+0	1.934286e+0	5.169867e-1	1	6	5.714286e-3	1.666667e-1	1	1	1	CpG_222	CpG_218,CpG_219,CpG_220,CpG_221,CpG_222,CpG_223	Rcvrn	Rcvrn
Ensembl Genes	3008	Doc2b	97	4.180237e-1	1.000000e+0	1.000000e+0	1.934286e+0	5.169867e-1	1	6	5.714286e-3	1.666667e-1	1	1	1	CpG_235	CpG_234,CpG_235,CpG_236,CpG_237,CpG_238,CpG_239	Doc2b	Doc2b
Ensembl Genes	20220	Rplp1	97	4.180237e-1	1.000000e+0	1.000000e+0	1.934286e+0	5.169867e-1	1	6	5.714286e-3	1.666667e-1	1	1	1	CpG_1969	CpG_1965,CpG_1966,CpG_1967,CpG_1968,CpG_1969,CpG_1970	Rplp1	Rplp1
Ensembl Genes	17767	Uvrag	97	4.180237e-1	1.000000e+0	1.000000e+0	1.934286e+0	5.169867e-1	1	6	5.714286e-3	1.666667e-1	1	1	1	CpG_1693	CpG_1688,CpG_1689,CpG_1690,CpG_1691,CpG_1692,CpG_1693	Uvrag	Uvrag
Ensembl Genes	17766	Wnt11	97	4.180237e-1	1.000000e+0	1.000000e+0	1.934286e+0	5.169867e-1	1	6	5.714286e-3	1.666667e-1	1	1	1	CpG_1693	CpG_1688,CpG_1689,CpG_1690,CpG_1691,CpG_1692,CpG_1693	Wnt11	Wnt11
Ensembl Genes	19285	Cdh11	97	4.180237e-1	1.000000e+0	1.000000e+0	1.934286e+0	5.169867e-1	1	6	5.714286e-3	1.666667e-1	1	1	1	CpG_1810	CpG_1809,CpG_1810,CpG_1811,CpG_1812,CpG_1813,CpG_1814	Cdh11	Cdh11
Ensembl Genes	20219	Tle3	97	4.180237e-1	1.000000e+0	1.000000e+0	1.934286e+0	5.169867e-1	1	6	5.714286e-3	1.666667e-1	1	1	1	CpG_1969	CpG_1965,CpG_1966,CpG_1967,CpG_1968,CpG_1969,CpG_1970	Tle3	Tle3
Ensembl Genes	3310	Osbpl7	108	4.683180e-1	1.000000e+0	1.000000e+0	1.657959e+0	6.031512e-1	1	7	5.714286e-3	1.428571e-1	1	1	1	CpG_262	CpG_262,CpG_263,CpG_264,CpG_265,CpG_266,CpG_267,CpG_268	Osbpl7	Osbpl7
Ensembl Genes	4439	Tnfaip2	108	4.683180e-1	1.000000e+0	1.000000e+0	1.657959e+0	6.031512e-1	1	7	5.714286e-3	1.428571e-1	1	1	1	CpG_484	CpG_479,CpG_480,CpG_481,CpG_482,CpG_483,CpG_484,CpG_485	Tnfaip2	Tnfaip2
Ensembl Genes	15762	Prr15	108	4.683180e-1	1.000000e+0	1.000000e+0	1.657959e+0	6.031512e-1	1	7	5.714286e-3	1.428571e-1	1	1	1	CpG_1511	CpG_1509,CpG_1510,CpG_1511,CpG_1512,CpG_1513,CpG_1514,CpG_1515	Prr15	Prr15
Ensembl Genes	3311	Tbx21	108	4.683180e-1	1.000000e+0	1.000000e+0	1.657959e+0	6.031512e-1	1	7	5.714286e-3	1.428571e-1	1	1	1	CpG_262	CpG_262,CpG_263,CpG_264,CpG_265,CpG_266,CpG_267,CpG_268	Tbx21	Tbx21
Ensembl Genes	15761	Chn2	108	4.683180e-1	1.000000e+0	1.000000e+0	1.657959e+0	6.031512e-1	1	7	5.714286e-3	1.428571e-1	1	1	1	CpG_1511	CpG_1509,CpG_1510,CpG_1511,CpG_1512,CpG_1513,CpG_1514,CpG_1515	Chn2	Chn2
Ensembl Genes	13910	Padi4	108	4.683180e-1	1.000000e+0	1.000000e+0	1.657959e+0	6.031512e-1	1	7	5.714286e-3	1.428571e-1	1	1	1	CpG_1360	CpG_1354,CpG_1355,CpG_1356,CpG_1357,CpG_1358,CpG_1359,CpG_1360	Padi4	Padi4
Ensembl Genes	13909	Padi6	108	4.683180e-1	1.000000e+0	1.000000e+0	1.657959e+0	6.031512e-1	1	7	5.714286e-3	1.428571e-1	1	1	1	CpG_1360	CpG_1354,CpG_1355,CpG_1356,CpG_1357,CpG_1358,CpG_1359,CpG_1360	Padi6	Padi6
Ensembl Genes	6762	Wnt7b	115	5.519540e-1	1.000000e+0	1.000000e+0	1.105306e+0	1.809453e+0	2	21	1.142857e-2	9.523810e-2	1	1	1	CpG_643,CpG_662	CpG_643,CpG_644,CpG_645,CpG_646,CpG_647,CpG_648,CpG_649,CpG_650,CpG_651,CpG_652,CpG_653,CpG_654,CpG_655,CpG_656,CpG_657,CpG_658,CpG_659,CpG_660,CpG_661,CpG_662,CpG_663	Wnt7b	Wnt7b
Ensembl Genes	2676	Wnt3a	116	5.563051e-1	1.000000e+0	1.000000e+0	1.289524e+0	7.754801e-1	1	9	5.714286e-3	1.111111e-1	1	1	1	CpG_207	CpG_203,CpG_204,CpG_205,CpG_206,CpG_207,CpG_208,CpG_209,CpG_210,CpG_211	Wnt3a	Wnt3a
Ensembl Genes	7747	Slc22a3	116	5.563051e-1	1.000000e+0	1.000000e+0	1.289524e+0	7.754801e-1	1	9	5.714286e-3	1.111111e-1	1	1	1	CpG_790	CpG_784,CpG_785,CpG_786,CpG_787,CpG_788,CpG_789,CpG_790,CpG_791,CpG_792	Slc22a3	Slc22a3
Ensembl Genes	14954	Sirt4	116	5.563051e-1	1.000000e+0	1.000000e+0	1.289524e+0	7.754801e-1	1	9	5.714286e-3	1.111111e-1	1	1	1	CpG_1433	CpG_1431,CpG_1432,CpG_1433,CpG_1434,CpG_1435,CpG_1436,CpG_1437,CpG_1438,CpG_1439	Sirt4	Sirt4
Ensembl Genes	2675	Arf1	116	5.563051e-1	1.000000e+0	1.000000e+0	1.289524e+0	7.754801e-1	1	9	5.714286e-3	1.111111e-1	1	1	1	CpG_207	CpG_203,CpG_204,CpG_205,CpG_206,CpG_207,CpG_208,CpG_209,CpG_210,CpG_211	Arf1	Arf1
Ensembl Genes	14953	Pla2g1b	116	5.563051e-1	1.000000e+0	1.000000e+0	1.289524e+0	7.754801e-1	1	9	5.714286e-3	1.111111e-1	1	1	1	CpG_1433	CpG_1431,CpG_1432,CpG_1433,CpG_1434,CpG_1435,CpG_1436,CpG_1437,CpG_1438,CpG_1439	Pla2g1b	Pla2g1b
Ensembl Genes	2343	Otx1	121	6.298007e-1	1.000000e+0	1.000000e+0	1.055065e+0	9.478090e-1	1	11	5.714286e-3	9.090909e-2	1	1	1	CpG_157	CpG_150,CpG_151,CpG_152,CpG_153,CpG_154,CpG_155,CpG_156,CpG_157,CpG_158,CpG_159,CpG_160	Otx1	Otx1
Ensembl Genes	15953	Emx1	121	6.298007e-1	1.000000e+0	1.000000e+0	1.055065e+0	9.478090e-1	1	11	5.714286e-3	9.090909e-2	1	1	1	CpG_1531	CpG_1522,CpG_1523,CpG_1524,CpG_1525,CpG_1526,CpG_1527,CpG_1528,CpG_1529,CpG_1530,CpG_1531,CpG_1532	Emx1	Emx1
Ensembl Genes	7157	Hic2	123	6.618724e-1	1.000000e+0	1.000000e+0	9.671429e-1	1.033973e+0	1	12	5.714286e-3	8.333333e-2	1	1	1	CpG_716	CpG_710,CpG_711,CpG_712,CpG_713,CpG_714,CpG_715,CpG_716,CpG_717,CpG_718,CpG_719,CpG_720,CpG_721	Hic2	Hic2
Ensembl Genes	7156	Rimbp3	123	6.618724e-1	1.000000e+0	1.000000e+0	9.671429e-1	1.033973e+0	1	12	5.714286e-3	8.333333e-2	1	1	1	CpG_716	CpG_710,CpG_711,CpG_712,CpG_713,CpG_714,CpG_715,CpG_716,CpG_717,CpG_718,CpG_719,CpG_720,CpG_721	Rimbp3	Rimbp3
Ensembl Genes	20434	Zic1	123	6.618724e-1	1.000000e+0	1.000000e+0	9.671429e-1	1.033973e+0	1	12	5.714286e-3	8.333333e-2	1	1	1	CpG_2000	CpG_2000,CpG_2001,CpG_2002,CpG_2003,CpG_2004,CpG_2005,CpG_2006,CpG_2007,CpG_2008,CpG_2009,CpG_2010,CpG_2011	Zic1	Zic1
Ensembl Genes	20435	Zic4	123	6.618724e-1	1.000000e+0	1.000000e+0	9.671429e-1	1.033973e+0	1	12	5.714286e-3	8.333333e-2	1	1	1	CpG_2000	CpG_2000,CpG_2001,CpG_2002,CpG_2003,CpG_2004,CpG_2005,CpG_2006,CpG_2007,CpG_2008,CpG_2009,CpG_2010,CpG_2011	Zic4	Zic4
Ensembl Genes	19409	Calb2	127	6.911802e-1	1.000000e+0	1.000000e+0	8.927473e-1	1.120138e+0	1	13	5.714286e-3	7.692308e-2	1	1	1	CpG_1866	CpG_1856,CpG_1857,CpG_1858,CpG_1859,CpG_1860,CpG_1861,CpG_1862,CpG_1863,CpG_1864,CpG_1865,CpG_1866,CpG_1867,CpG_1868	Calb2	Calb2
Ensembl Genes	6763	Ppara	128	8.209299e-1	1.000000e+0	1.000000e+0	6.108271e-1	1.637125e+0	1	19	5.714286e-3	5.263158e-2	1	1	1	CpG_662	CpG_645,CpG_646,CpG_647,CpG_648,CpG_649,CpG_650,CpG_651,CpG_652,CpG_653,CpG_654,CpG_655,CpG_656,CpG_657,CpG_658,CpG_659,CpG_660,CpG_661,CpG_662,CpG_663	Ppara	Ppara
GO Biological Process	GO:0051346	negative regulation of hydrolase activity	1	4.230252e-13	5.439258e-9	5.439258e-9	5.802857e+0	3.791236e+0	22	44	1.257143e-1	5.000000e-1	6	8	439	CpG_1322,CpG_147,CpG_148,CpG_149,CpG_1640,CpG_1641,CpG_1642,CpG_1644,CpG_1815,CpG_1816,CpG_1818,CpG_1820,CpG_1822,CpG_1824,CpG_1826,CpG_1828,CpG_257,CpG_258,CpG_259,CpG_40,CpG_41,CpG_42	CpG_1322,CpG_1323,CpG_147,CpG_148,CpG_149,CpG_1640,CpG_1641,CpG_1642,CpG_1643,CpG_1644,CpG_1815,CpG_1816,CpG_1817,CpG_1818,CpG_1819,CpG_1820,CpG_1821,CpG_1822,CpG_1823,CpG_1824,CpG_1825,CpG_1826,CpG_1827,CpG_1828,CpG_1829,CpG_1830,CpG_1831,CpG_257,CpG_258,CpG_259,CpG_40,CpG_41,CpG_42,CpG_579,CpG_580,CpG_581,CpG_810,CpG_811,CpG_812,CpG_813,CpG_814,CpG_815,CpG_816,CpG_817	Atpif1,Bcas3,Nol3,Sfi1,Tgfb2,Tsks	Atpif1,Bcas3,Lrch1,Nol3,Pi16,Sfi1,Tgfb2,Tsks
GO Biological Process	GO:0043086	negative regulation of catalytic activity	2	5.681667e-12	7.305487e-8	3.652744e-8	3.523163e+0	9.650419e+0	34	112	1.942857e-1	3.035714e-1	8	16	802	CpG_1322,CpG_147,CpG_148,CpG_149,CpG_1640,CpG_1641,CpG_1642,CpG_1644,CpG_1815,CpG_1816,CpG_1818,CpG_1820,CpG_1822,CpG_1824,CpG_1826,CpG_1828,CpG_257,CpG_258,CpG_259,CpG_282,CpG_283,CpG_287,CpG_289,CpG_40,CpG_41,CpG_42,CpG_990,CpG_991,CpG_994,CpG_995,CpG_996,CpG_997,CpG_998,CpG_999	CpG_1322,CpG_1323,CpG_1335,CpG_1336,CpG_1337,CpG_1338,CpG_1339,CpG_1340,CpG_147,CpG_148,CpG_149,CpG_1595,CpG_1596,CpG_1597,CpG_1598,CpG_1599,CpG_1640,CpG_1641,CpG_1642,CpG_1643,CpG_1644,CpG_165,CpG_166,CpG_167,CpG_168,CpG_169,CpG_170,CpG_1700,CpG_1701,CpG_1702,CpG_1703,CpG_1704,CpG_1705,CpG_171,CpG_1815,CpG_1816,CpG_1817,CpG_1818,CpG_1819,CpG_1820,CpG_1821,CpG_1822,CpG_1823,CpG_1824,CpG_1825,CpG_…	Atpif1,Bcas3,Nol3,Phpt1,Sfi1,Srcin1,Tgfb2,Tsks	Apoe,Atpif1,Bcas3,Camk2n1,Lrch1,Lrrc15,Nol3,Npm1,Phpt1,Pi16,Ptprc,Sfi1,Smpd1,Srcin1,Tgfb2,Tsks
GO Biological Process	GO:2000249	regulation of actin cytoskeleton reorganization	3	9.682943e-11	1.245033e-6	4.150109e-7	9.820220e+0	1.120138e+0	11	13	6.285714e-2	8.461538e-1	2	2	33	CpG_257,CpG_258,CpG_259,CpG_990,CpG_991,CpG_994,CpG_995,CpG_996,CpG_997,CpG_998,CpG_999	CpG_257,CpG_258,CpG_259,CpG_990,CpG_991,CpG_992,CpG_993,CpG_994,CpG_995,CpG_996,CpG_997,CpG_998,CpG_999	Bcas3,Phpt1	Bcas3,Phpt1
GO Biological Process	GO:0010923	negative regulation of phosphatase activity	4	1.807448e-10	2.324017e-6	5.810042e-7	1.055065e+1	9.478090e-1	10	11	5.714286e-2	9.090909e-1	3	3	78	CpG_147,CpG_148,CpG_149,CpG_1640,CpG_1641,CpG_1642,CpG_1644,CpG_40,CpG_41,CpG_42	CpG_147,CpG_148,CpG_149,CpG_1640,CpG_1641,CpG_1642,CpG_1643,CpG_1644,CpG_40,CpG_41,CpG_42	Sfi1,Tgfb2,Tsks	Sfi1,Tgfb2,Tsks
GO Biological Process	GO:0035305	negative regulation of dephosphorylation	4	1.807448e-10	2.324017e-6	5.810042e-7	1.055065e+1	9.478090e-1	10	11	5.714286e-2	9.090909e-1	3	3	88	CpG_147,CpG_148,CpG_149,CpG_1640,CpG_1641,CpG_1642,CpG_1644,CpG_40,CpG_41,CpG_42	CpG_147,CpG_148,CpG_149,CpG_1640,CpG_1641,CpG_1642,CpG_1643,CpG_1644,CpG_40,CpG_41,CpG_42	Sfi1,Tgfb2,Tsks	Sfi1,Tgfb2,Tsks
GO Biological Process	GO:0032844	regulation of homeostatic process	6	1.297067e-9	1.667769e-5	2.779615e-6	4.352143e+0	4.825209e+0	21	56	1.200000e-1	3.750000e-1	4	8	491	CpG_1539,CpG_1540,CpG_1815,CpG_1816,CpG_1818,CpG_1820,CpG_1822,CpG_1824,CpG_1826,CpG_1828,CpG_40,CpG_41,CpG_42,CpG_990,CpG_991,CpG_994,CpG_995,CpG_996,CpG_997,CpG_998,CpG_999	CpG_1239,CpG_1240,CpG_1241,CpG_1242,CpG_1243,CpG_1518,CpG_1519,CpG_1520,CpG_1521,CpG_1539,CpG_1540,CpG_1541,CpG_1542,CpG_1543,CpG_1815,CpG_1816,CpG_1817,CpG_1818,CpG_1819,CpG_1820,CpG_1821,CpG_1822,CpG_1823,CpG_1824,CpG_1825,CpG_1826,CpG_1827,CpG_1828,CpG_1829,CpG_1830,CpG_1831,CpG_31,CpG_32,CpG_33,CpG_34,CpG_40,CpG_41,CpG_42,CpG_693,CpG_694,CpG_695,CpG_696,CpG_697,CpG_698,CpG_699,CpG_700,CpG_990…	Gata2,Nol3,Phpt1,Tgfb2	Gata2,Nol3,Nr4a3,Parn,Phpt1,Ptprc,Tacr1,Tgfb2
GO Biological Process	GO:1902070	positive regulation of sphingolipid mediated signaling pathway	7	7.976302e-9	1.025593e-4	1.465133e-5	6.963429e+0	1.723289e+0	12	20	6.857143e-2	6.000000e-1	1	1	1	CpG_1482,CpG_1483,CpG_1484,CpG_1485,CpG_1486,CpG_1487,CpG_1488,CpG_1492,CpG_1493,CpG_1495,CpG_1496,CpG_1497	CpG_1482,CpG_1483,CpG_1484,CpG_1485,CpG_1486,CpG_1487,CpG_1488,CpG_1489,CpG_1490,CpG_1491,CpG_1492,CpG_1493,CpG_1494,CpG_1495,CpG_1496,CpG_1497,CpG_1498,CpG_1499,CpG_1500,CpG_1501	Klf14	Klf14
GO Biological Process	GO:1902068	regulation of sphingolipid mediated signaling pathway	7	7.976302e-9	1.025593e-4	1.465133e-5	6.963429e+0	1.723289e+0	12	20	6.857143e-2	6.000000e-1	1	1	2	CpG_1482,CpG_1483,CpG_1484,CpG_1485,CpG_1486,CpG_1487,CpG_1488,CpG_1492,CpG_1493,CpG_1495,CpG_1496,CpG_1497	CpG_1482,CpG_1483,CpG_1484,CpG_1485,CpG_1486,CpG_1487,CpG_1488,CpG_1489,CpG_1490,CpG_1491,CpG_1492,CpG_1493,CpG_1494,CpG_1495,CpG_1496,CpG_1497,CpG_1498,CpG_1499,CpG_1500,CpG_1501	Klf14	Klf14
GO Biological Process	GO:0032970	regulation of actin filament-based process	9	7.107174e-8	9.138404e-4	1.015378e-4	4.289068e+0	3.963565e+0	17	46	9.714286e-2	3.695652e-1	6	8	329	CpG_1693,CpG_1927,CpG_207,CpG_257,CpG_258,CpG_259,CpG_40,CpG_41,CpG_42,CpG_990,CpG_991,CpG_994,CpG_995,CpG_996,CpG_997,CpG_998,CpG_999	CpG_1518,CpG_1519,CpG_1520,CpG_1521,CpG_1688,CpG_1689,CpG_1690,CpG_1691,CpG_1692,CpG_1693,CpG_1925,CpG_1926,CpG_1927,CpG_1928,CpG_1929,CpG_203,CpG_204,CpG_205,CpG_206,CpG_207,CpG_208,CpG_209,CpG_210,CpG_211,CpG_257,CpG_258,CpG_259,CpG_40,CpG_41,CpG_42,CpG_614,CpG_615,CpG_616,CpG_617,CpG_618,CpG_619,CpG_990,CpG_991,CpG_992,CpG_993,CpG_994,CpG_995,CpG_996,CpG_997,CpG_998,CpG_999	Arf1,Bcas3,Kank2,Phpt1,Tgfb2,Wnt11	Arf1,Bcas3,Kank2,Phpt1,Sh3bp1,Tacr1,Tgfb2,Wnt11
GO Biological Process	GO:0032956	regulation of actin cytoskeleton organization	9	7.107174e-8	9.138404e-4	1.015378e-4	4.289068e+0	3.963565e+0	17	46	9.714286e-2	3.695652e-1	6	8	293	CpG_1693,CpG_1927,CpG_207,CpG_257,CpG_258,CpG_259,CpG_40,CpG_41,CpG_42,CpG_990,CpG_991,CpG_994,CpG_995,CpG_996,CpG_997,CpG_998,CpG_999	CpG_1518,CpG_1519,CpG_1520,CpG_1521,CpG_1688,CpG_1689,CpG_1690,CpG_1691,CpG_1692,CpG_1693,CpG_1925,CpG_1926,CpG_1927,CpG_1928,CpG_1929,CpG_203,CpG_204,CpG_205,CpG_206,CpG_207,CpG_208,CpG_209,CpG_210,CpG_211,CpG_257,CpG_258,CpG_259,CpG_40,CpG_41,CpG_42,CpG_614,CpG_615,CpG_616,CpG_617,CpG_618,CpG_619,CpG_990,CpG_991,CpG_992,CpG_993,CpG_994,CpG_995,CpG_996,CpG_997,CpG_998,CpG_999	Arf1,Bcas3,Kank2,Phpt1,Tgfb2,Wnt11	Arf1,Bcas3,Kank2,Phpt1,Sh3bp1,Tacr1,Tgfb2,Wnt11
GO Biological Process	GO:0010921	regulation of phosphatase activity	11	8.950650e-8	1.150875e-3	1.046250e-4	7.253571e+0	1.378631e+0	10	16	5.714286e-2	6.250000e-1	3	4	118	CpG_147,CpG_148,CpG_149,CpG_1640,CpG_1641,CpG_1642,CpG_1644,CpG_40,CpG_41,CpG_42	CpG_147,CpG_148,CpG_149,CpG_1640,CpG_1641,CpG_1642,CpG_1643,CpG_1644,CpG_40,CpG_41,CpG_42,CpG_767,CpG_768,CpG_769,CpG_770,CpG_771	Sfi1,Tgfb2,Tsks	Rcan1,Sfi1,Tgfb2,Tsks
GO Biological Process	GO:0051350	negative regulation of lyase activity	12	1.011939e-7	1.301151e-3	1.084293e-4	9.284571e+0	8.616445e-1	8	10	4.571429e-2	8.000000e-1	1	1	27	CpG_990,CpG_991,CpG_994,CpG_995,CpG_996,CpG_997,CpG_998,CpG_999	CpG_990,CpG_991,CpG_992,CpG_993,CpG_994,CpG_995,CpG_996,CpG_997,CpG_998,CpG_999	Phpt1	Phpt1
GO Biological Process	GO:0061178	regulation of insulin secretion involved in cellular response to glucose stimulus	12	1.011939e-7	1.301151e-3	1.084293e-4	9.284571e+0	8.616445e-1	8	10	4.571429e-2	8.000000e-1	1	1	68	CpG_990,CpG_991,CpG_994,CpG_995,CpG_996,CpG_997,CpG_998,CpG_999	CpG_990,CpG_991,CpG_992,CpG_993,CpG_994,CpG_995,CpG_996,CpG_997,CpG_998,CpG_999	Phpt1	Phpt1
GO Biological Process	GO:0051339	regulation of lyase activity	12	1.011939e-7	1.301151e-3	1.084293e-4	9.284571e+0	8.616445e-1	8	10	4.571429e-2	8.000000e-1	1	1	71	CpG_990,CpG_991,CpG_994,CpG_995,CpG_996,CpG_997,CpG_998,CpG_999	CpG_990,CpG_991,CpG_992,CpG_993,CpG_994,CpG_995,CpG_996,CpG_997,CpG_998,CpG_999	Phpt1	Phpt1
GO Biological Process	GO:2000984	negative regulation of ATP citrate synthase activity	12	1.011939e-7	1.301151e-3	1.084293e-4	9.284571e+0	8.616445e-1	8	10	4.571429e-2	8.000000e-1	1	1	3	CpG_990,CpG_991,CpG_994,CpG_995,CpG_996,CpG_997,CpG_998,CpG_999	CpG_990,CpG_991,CpG_992,CpG_993,CpG_994,CpG_995,CpG_996,CpG_997,CpG_998,CpG_999	Phpt1	Phpt1
GO Biological Process	GO:0035971	peptidyl-histidine dephosphorylation	12	1.011939e-7	1.301151e-3	1.084293e-4	9.284571e+0	8.616445e-1	8	10	4.571429e-2	8.000000e-1	1	1	1	CpG_990,CpG_991,CpG_994,CpG_995,CpG_996,CpG_997,CpG_998,CpG_999	CpG_990,CpG_991,CpG_992,CpG_993,CpG_994,CpG_995,CpG_996,CpG_997,CpG_998,CpG_999	Phpt1	Phpt1
GO Biological Process	GO:0035774	positive regulation of insulin secretion involved in cellular response to glucose stimulus	12	1.011939e-7	1.301151e-3	1.084293e-4	9.284571e+0	8.616445e-1	8	10	4.571429e-2	8.000000e-1	1	1	31	CpG_990,CpG_991,CpG_994,CpG_995,CpG_996,CpG_997,CpG_998,CpG_999	CpG_990,CpG_991,CpG_992,CpG_993,CpG_994,CpG_995,CpG_996,CpG_997,CpG_998,CpG_999	Phpt1	Phpt1
GO Biological Process	GO:0050858	negative regulation of antigen receptor-mediated signaling pathway	12	1.011939e-7	1.301151e-3	1.084293e-4	9.284571e+0	8.616445e-1	8	10	4.571429e-2	8.000000e-1	1	1	23	CpG_990,CpG_991,CpG_994,CpG_995,CpG_996,CpG_997,CpG_998,CpG_999	CpG_990,CpG_991,CpG_992,CpG_993,CpG_994,CpG_995,CpG_996,CpG_997,CpG_998,CpG_999	Phpt1	Phpt1
GO Biological Process	GO:0050860	negative regulation of T cell receptor signaling pathway	12	1.011939e-7	1.301151e-3	1.084293e-4	9.284571e+0	8.616445e-1	8	10	4.571429e-2	8.000000e-1	1	1	19	CpG_990,CpG_991,CpG_994,CpG_995,CpG_996,CpG_997,CpG_998,CpG_999	CpG_990,CpG_991,CpG_992,CpG_993,CpG_994,CpG_995,CpG_996,CpG_997,CpG_998,CpG_999	Phpt1	Phpt1
GO Biological Process	GO:0007264	small GTPase mediated signal transduction	20	1.587151e-7	2.040759e-3	1.020379e-4	4.318405e+0	3.705071e+0	16	43	9.142857e-2	3.720930e-1	4	7	250	CpG_1471,CpG_1473,CpG_1475,CpG_1477,CpG_1478,CpG_207,CpG_296,CpG_297,CpG_298,CpG_299,CpG_300,CpG_301,CpG_302,CpG_303,CpG_304,CpG_766	CpG_115,CpG_116,CpG_117,CpG_118,CpG_119,CpG_1471,CpG_1472,CpG_1473,CpG_1474,CpG_1475,CpG_1476,CpG_1477,CpG_1478,CpG_1742,CpG_1743,CpG_1744,CpG_1745,CpG_1746,CpG_1747,CpG_1748,CpG_190,CpG_203,CpG_204,CpG_205,CpG_206,CpG_207,CpG_208,CpG_209,CpG_210,CpG_211,CpG_296,CpG_297,CpG_298,CpG_299,CpG_300,CpG_301,CpG_302,CpG_303,CpG_304,CpG_763,CpG_764,CpG_765,CpG_766	Arf1,Gm6408,Rapgefl1,Tiam1	Arf1,Gm6408,Rap1b,Rapgefl1,Rasgef1c,Rfxank,Tiam1
GO Biological Process	GO:0032846	positive regulation of homeostatic process	21	3.047067e-7	3.917919e-3	1.865676e-4	5.029143e+0	2.584934e+0	13	30	7.428571e-2	4.333333e-1	3	5	220	CpG_1539,CpG_1540,CpG_40,CpG_41,CpG_42,CpG_990,CpG_991,CpG_994,CpG_995,CpG_996,CpG_997,CpG_998,CpG_999	CpG_1518,CpG_1519,CpG_1520,CpG_1521,CpG_1539,CpG_1540,CpG_1541,CpG_1542,CpG_1543,CpG_40,CpG_41,CpG_42,CpG_693,CpG_694,CpG_695,CpG_696,CpG_697,CpG_698,CpG_699,CpG_700,CpG_990,CpG_991,CpG_992,CpG_993,CpG_994,CpG_995,CpG_996,CpG_997,CpG_998,CpG_999	Gata2,Phpt1,Tgfb2	Gata2,Parn,Phpt1,Tacr1,Tgfb2
GO Biological Process	GO:0010002	cardioblast differentiation	22	3.780574e-7	4.861062e-3	2.209574e-4	1.160571e+1	5.169867e-1	6	6	3.428571e-2	1.000000e+0	2	2	13	CpG_257,CpG_258,CpG_259,CpG_40,CpG_41,CpG_42	CpG_257,CpG_258,CpG_259,CpG_40,CpG_41,CpG_42	Tbx2,Tgfb2	Tbx2,Tgfb2
GO Biological Process	GO:2001237	negative regulation of extrinsic apoptotic signaling pathway	23	4.368464e-7	5.616971e-3	2.442161e-4	5.802857e+0	1.895618e+0	11	22	6.285714e-2	5.000000e-1	2	2	100	CpG_1815,CpG_1816,CpG_1818,CpG_1820,CpG_1822,CpG_1824,CpG_1826,CpG_1828,CpG_501,CpG_502,CpG_504	CpG_1815,CpG_1816,CpG_1817,CpG_1818,CpG_1819,CpG_1820,CpG_1821,CpG_1822,CpG_1823,CpG_1824,CpG_1825,CpG_1826,CpG_1827,CpG_1828,CpG_1829,CpG_1830,CpG_1831,CpG_500,CpG_501,CpG_502,CpG_503,CpG_504	Dapk1,Nol3	Dapk1,Nol3
GO Biological Process	GO:0097190	apoptotic signaling pathway	24	9.159598e-7	1.177741e-2	4.907255e-4	3.868571e+0	4.135894e+0	16	48	9.142857e-2	3.333333e-1	4	7	280	CpG_1815,CpG_1816,CpG_1818,CpG_1820,CpG_1822,CpG_1824,CpG_1826,CpG_1828,CpG_40,CpG_41,CpG_42,CpG_501,CpG_502,CpG_504,CpG_949,CpG_953	CpG_1077,CpG_1078,CpG_1119,CpG_1120,CpG_1121,CpG_1815,CpG_1816,CpG_1817,CpG_1818,CpG_1819,CpG_1820,CpG_1821,CpG_1822,CpG_1823,CpG_1824,CpG_1825,CpG_1826,CpG_1827,CpG_1828,CpG_1829,CpG_1830,CpG_1831,CpG_240,CpG_241,CpG_242,CpG_243,CpG_244,CpG_245,CpG_246,CpG_247,CpG_248,CpG_249,CpG_250,CpG_251,CpG_252,CpG_40,CpG_41,CpG_42,CpG_500,CpG_501,CpG_502,CpG_503,CpG_504,CpG_949,CpG_950,CpG_951,CpG_952,CpG_…	Cd5,Dapk1,Nol3,Tgfb2	Bcl2l11,Cd5,Dapk1,Dido1,Nol3,Rhot1,Tgfb2
GO Biological Process	GO:0035303	regulation of dephosphorylation	25	4.555036e-6	5.856865e-2	2.342746e-3	5.275325e+0	1.895618e+0	10	22	5.714286e-2	4.545455e-1	3	5	152	CpG_147,CpG_148,CpG_149,CpG_1640,CpG_1641,CpG_1642,CpG_1644,CpG_40,CpG_41,CpG_42	CpG_147,CpG_148,CpG_149,CpG_1640,CpG_1641,CpG_1642,CpG_1643,CpG_1644,CpG_1700,CpG_1701,CpG_1702,CpG_1703,CpG_1704,CpG_1705,CpG_40,CpG_41,CpG_42,CpG_767,CpG_768,CpG_769,CpG_770,CpG_771	Sfi1,Tgfb2,Tsks	Rcan1,Sfi1,Smpd1,Tgfb2,Tsks
GO Biological Process	GO:0070207	protein homotrimerization	26	7.462698e-6	9.595537e-2	3.690591e-3	5.045963e+0	1.981782e+0	10	23	5.714286e-2	4.347826e-1	3	3	30	CpG_1815,CpG_1816,CpG_1818,CpG_1820,CpG_1822,CpG_1824,CpG_1826,CpG_1828,CpG_566,CpG_640	CpG_1815,CpG_1816,CpG_1817,CpG_1818,CpG_1819,CpG_1820,CpG_1821,CpG_1822,CpG_1823,CpG_1824,CpG_1825,CpG_1826,CpG_1827,CpG_1828,CpG_1829,CpG_1830,CpG_1831,CpG_564,CpG_565,CpG_566,CpG_640,CpG_641,CpG_642	Atxn10,Hsf4,Scara5	Atxn10,Hsf4,Scara5
GO Biological Process	GO:0030307	positive regulation of cell growth	27	8.216771e-6	1.056512e-1	3.913009e-3	4.220260e+0	2.843427e+0	12	33	6.857143e-2	3.636364e-1	4	6	149	CpG_161,CpG_162,CpG_164,CpG_207,CpG_40,CpG_41,CpG_42,CpG_861,CpG_862,CpG_863,CpG_864,CpG_865	CpG_1056,CpG_1057,CpG_1058,CpG_161,CpG_162,CpG_163,CpG_164,CpG_203,CpG_204,CpG_205,CpG_206,CpG_207,CpG_208,CpG_209,CpG_210,CpG_211,CpG_212,CpG_213,CpG_214,CpG_215,CpG_216,CpG_217,CpG_40,CpG_41,CpG_42,CpG_858,CpG_859,CpG_860,CpG_861,CpG_862,CpG_863,CpG_864,CpG_865	Bcl11a,Hdgfl2,Tgfb2,Wnt3a	Bcl11a,Bdnf,Hdgfl2,Tgfb2,Trpv2,Wnt3a
GO Biological Process	GO:2001234	negative regulation of apoptotic signaling pathway	28	8.369625e-6	1.076166e-1	3.843451e-3	4.559388e+0	2.412605e+0	11	28	6.285714e-2	3.928571e-1	2	3	219	CpG_1815,CpG_1816,CpG_1818,CpG_1820,CpG_1822,CpG_1824,CpG_1826,CpG_1828,CpG_501,CpG_502,CpG_504	CpG_1401,CpG_1402,CpG_1403,CpG_1404,CpG_1405,CpG_1406,CpG_1815,CpG_1816,CpG_1817,CpG_1818,CpG_1819,CpG_1820,CpG_1821,CpG_1822,CpG_1823,CpG_1824,CpG_1825,CpG_1826,CpG_1827,CpG_1828,CpG_1829,CpG_1830,CpG_1831,CpG_500,CpG_501,CpG_502,CpG_503,CpG_504	Dapk1,Nol3	Dapk1,Nol3,Slc35f6
GO Biological Process	GO:0070206	protein trimerization	28	8.369625e-6	1.076166e-1	3.843451e-3	4.559388e+0	2.412605e+0	11	28	6.285714e-2	3.928571e-1	4	4	52	CpG_1815,CpG_1816,CpG_1818,CpG_1820,CpG_1822,CpG_1824,CpG_1826,CpG_1828,CpG_358,CpG_566,CpG_640	CpG_1815,CpG_1816,CpG_1817,CpG_1818,CpG_1819,CpG_1820,CpG_1821,CpG_1822,CpG_1823,CpG_1824,CpG_1825,CpG_1826,CpG_1827,CpG_1828,CpG_1829,CpG_1830,CpG_1831,CpG_358,CpG_359,CpG_360,CpG_361,CpG_362,CpG_564,CpG_565,CpG_566,CpG_640,CpG_641,CpG_642	Atxn10,C1qtnf1,Hsf4,Scara5	Atxn10,C1qtnf1,Hsf4,Scara5
GO Biological Process	GO:0070201	regulation of establishment of protein localization	30	1.454054e-5	1.869623e-1	6.232075e-3	2.272448e+0	1.232152e+1	28	143	1.600000e-1	1.958042e-1	13	23	765	CpG_1322,CpG_1433,CpG_1815,CpG_1816,CpG_1818,CpG_1820,CpG_1822,CpG_1824,CpG_1826,CpG_1828,CpG_2000,CpG_207,CpG_235,CpG_257,CpG_258,CpG_259,CpG_40,CpG_41,CpG_42,CpG_640,CpG_990,CpG_991,CpG_994,CpG_995,CpG_996,CpG_997,CpG_998,CpG_999	CpG_1222,CpG_1223,CpG_1224,CpG_1322,CpG_1323,CpG_1415,CpG_1416,CpG_1417,CpG_1418,CpG_1419,CpG_1420,CpG_1431,CpG_1432,CpG_1433,CpG_1434,CpG_1435,CpG_1436,CpG_1437,CpG_1438,CpG_1439,CpG_1554,CpG_1555,CpG_1556,CpG_1557,CpG_1558,CpG_1559,CpG_1560,CpG_1561,CpG_1562,CpG_1563,CpG_1773,CpG_1774,CpG_1775,CpG_1776,CpG_1777,CpG_1815,CpG_1816,CpG_1817,CpG_1818,CpG_1819,CpG_1820,CpG_1821,CpG_1822,CpG_1823,CpG…	Arf1,Atpif1,Bcas3,Doc2b,Fbln1,Lyplal1,Nol3,Phpt1,Rph3al,Sirt4,Tgfb2,Wnt3a,Zic1	Arf1,Atpif1,Axin2,Bcas3,Cadm1,Ccr7,Cyld,Ddx58,Doc2b,Fbln1,Il17ra,Kcne1,Lyplal1,Nkx6-1,Nod2,Nol3,Phpt1,Rph3al,Sec16b,Sirt4,Tgfb2,Wnt3a,Zic1
GO Biological Process	GO:0051223	regulation of protein transport	30	1.454054e-5	1.869623e-1	6.232075e-3	2.272448e+0	1.232152e+1	28	143	1.600000e-1	1.958042e-1	13	23	742	CpG_1322,CpG_1433,CpG_1815,CpG_1816,CpG_1818,CpG_1820,CpG_1822,CpG_1824,CpG_1826,CpG_1828,CpG_2000,CpG_207,CpG_235,CpG_257,CpG_258,CpG_259,CpG_40,CpG_41,CpG_42,CpG_640,CpG_990,CpG_991,CpG_994,CpG_995,CpG_996,CpG_997,CpG_998,CpG_999	CpG_1222,CpG_1223,CpG_1224,CpG_1322,CpG_1323,CpG_1415,CpG_1416,CpG_1417,CpG_1418,CpG_1419,CpG_1420,CpG_1431,CpG_1432,CpG_1433,CpG_1434,CpG_1435,CpG_1436,CpG_1437,CpG_1438,CpG_1439,CpG_1554,CpG_1555,CpG_1556,CpG_1557,CpG_1558,CpG_1559,CpG_1560,CpG_1561,CpG_1562,CpG_1563,CpG_1773,CpG_1774,CpG_1775,CpG_1776,CpG_1777,CpG_1815,CpG_1816,CpG_1817,CpG_1818,CpG_1819,CpG_1820,CpG_1821,CpG_1822,CpG_1823,CpG…	Arf1,Atpif1,Bcas3,Doc2b,Fbln1,Lyplal1,Nol3,Phpt1,Rph3al,Sirt4,Tgfb2,Wnt3a,Zic1	Arf1,Atpif1,Axin2,Bcas3,Cadm1,Ccr7,Cyld,Ddx58,Doc2b,Fbln1,Il17ra,Kcne1,Lyplal1,Nkx6-1,Nod2,Nol3,Phpt1,Rph3al,Sec16b,Sirt4,Tgfb2,Wnt3a,Zic1
GO Biological Process	GO:0008360	regulation of cell shape	32	1.824874e-5	2.346423e-1	7.332572e-3	4.255429e+0	2.584934e+0	11	30	6.285714e-2	3.666667e-1	3	4	141	CpG_1471,CpG_1473,CpG_1475,CpG_1477,CpG_1478,CpG_1492,CpG_1493,CpG_1495,CpG_1496,CpG_1497,CpG_222	CpG_1471,CpG_1472,CpG_1473,CpG_1474,CpG_1475,CpG_1476,CpG_1477,CpG_1478,CpG_1492,CpG_1493,CpG_1494,CpG_1495,CpG_1496,CpG_1497,CpG_1498,CpG_1499,CpG_1500,CpG_1501,CpG_218,CpG_219,CpG_220,CpG_221,CpG_222,CpG_223,CpG_469,CpG_470,CpG_471,CpG_472,CpG_473,CpG_474	Gas7,Mkln1,Wasf3	Gas7,Mkln1,Vrk1,Wasf3
GO Biological Process	GO:0060341	regulation of cellular localization	33	2.515752e-5	3.234754e-1	9.802285e-3	2.210612e+0	1.266617e+1	28	147	1.600000e-1	1.904762e-1	11	23	868	CpG_1322,CpG_1433,CpG_1539,CpG_1540,CpG_1815,CpG_1816,CpG_1818,CpG_1820,CpG_1822,CpG_1824,CpG_1826,CpG_1828,CpG_2000,CpG_207,CpG_257,CpG_258,CpG_259,CpG_40,CpG_41,CpG_42,CpG_990,CpG_991,CpG_994,CpG_995,CpG_996,CpG_997,CpG_998,CpG_999	CpG_115,CpG_116,CpG_117,CpG_118,CpG_119,CpG_1222,CpG_1223,CpG_1224,CpG_1322,CpG_1323,CpG_1431,CpG_1432,CpG_1433,CpG_1434,CpG_1435,CpG_1436,CpG_1437,CpG_1438,CpG_1439,CpG_1469,CpG_1470,CpG_1539,CpG_1540,CpG_1541,CpG_1542,CpG_1543,CpG_165,CpG_166,CpG_167,CpG_168,CpG_169,CpG_1694,CpG_1695,CpG_1696,CpG_1697,CpG_1698,CpG_1699,CpG_170,CpG_171,CpG_1749,CpG_1750,CpG_1751,CpG_1752,CpG_1753,CpG_1754,CpG_17…	Arf1,Atpif1,Bcas3,Gata2,Lyplal1,Nol3,Phpt1,Sirt4,Tgfb2,Wnt3a,Zic1	Arf1,Atpif1,Axin2,Bcas3,Cyld,Ddx58,Gata2,Kcne1,Lrrc15,Lyplal1,Nol3,Npm1,Numa1,Phpt1,Rab3a,Rap1b,Rhot1,Sec16b,Sirt4,Stx1a,Tgfb2,Wnt3a,Zic1
GO Biological Process	GO:1902175	regulation of oxidative stress-induced intrinsic apoptotic signaling pathway	34	2.534896e-5	3.259369e-1	9.586380e-3	4.973878e+0	1.809453e+0	9	21	5.142857e-2	4.285714e-1	2	2	26	CpG_1815,CpG_1816,CpG_1818,CpG_1820,CpG_1822,CpG_1824,CpG_1826,CpG_1828,CpG_766	CpG_1815,CpG_1816,CpG_1817,CpG_1818,CpG_1819,CpG_1820,CpG_1821,CpG_1822,CpG_1823,CpG_1824,CpG_1825,CpG_1826,CpG_1827,CpG_1828,CpG_1829,CpG_1830,CpG_1831,CpG_763,CpG_764,CpG_765,CpG_766	Nol3,Sod1	Nol3,Sod1
GO Biological Process	GO:2000147	positive regulation of cell motility	35	2.689033e-5	3.457559e-1	9.878739e-3	2.944733e+0	5.773018e+0	17	67	9.714286e-2	2.537313e-1	6	14	440	CpG_1693,CpG_257,CpG_258,CpG_259,CpG_40,CpG_41,CpG_42,CpG_640,CpG_766,CpG_990,CpG_991,CpG_994,CpG_995,CpG_996,CpG_997,CpG_998,CpG_999	CpG_1220,CpG_136,CpG_137,CpG_138,CpG_139,CpG_140,CpG_141,CpG_142,CpG_143,CpG_144,CpG_145,CpG_146,CpG_1518,CpG_1519,CpG_1520,CpG_1521,CpG_1688,CpG_1689,CpG_1690,CpG_1691,CpG_1692,CpG_1693,CpG_1738,CpG_1739,CpG_1740,CpG_1741,CpG_257,CpG_258,CpG_259,CpG_305,CpG_306,CpG_307,CpG_31,CpG_32,CpG_33,CpG_34,CpG_40,CpG_41,CpG_42,CpG_640,CpG_641,CpG_642,CpG_731,CpG_732,CpG_733,CpG_734,CpG_735,CpG_736,CpG_763…	Bcas3,Fbln1,Phpt1,Tgfb2,Tiam1,Wnt11	Bcas3,Ccbe1,Ccr7,Csf1,Fbln1,Gli1,Lrrc15,Phpt1,Ptprc,Tacr1,Tgfb2,Tiam1,Wnt11,Zfp703
GO Biological Process	GO:0040017	positive regulation of locomotion	35	2.689033e-5	3.457559e-1	9.878739e-3	2.944733e+0	5.773018e+0	17	67	9.714286e-2	2.537313e-1	6	14	471	CpG_1693,CpG_257,CpG_258,CpG_259,CpG_40,CpG_41,CpG_42,CpG_640,CpG_766,CpG_990,CpG_991,CpG_994,CpG_995,CpG_996,CpG_997,CpG_998,CpG_999	CpG_1220,CpG_136,CpG_137,CpG_138,CpG_139,CpG_140,CpG_141,CpG_142,CpG_143,CpG_144,CpG_145,CpG_146,CpG_1518,CpG_1519,CpG_1520,CpG_1521,CpG_1688,CpG_1689,CpG_1690,CpG_1691,CpG_1692,CpG_1693,CpG_1738,CpG_1739,CpG_1740,CpG_1741,CpG_257,CpG_258,CpG_259,CpG_305,CpG_306,CpG_307,CpG_31,CpG_32,CpG_33,CpG_34,CpG_40,CpG_41,CpG_42,CpG_640,CpG_641,CpG_642,CpG_731,CpG_732,CpG_733,CpG_734,CpG_735,CpG_736,CpG_763…	Bcas3,Fbln1,Phpt1,Tgfb2,Tiam1,Wnt11	Bcas3,Ccbe1,Ccr7,Csf1,Fbln1,Gli1,Lrrc15,Phpt1,Ptprc,Tacr1,Tgfb2,Tiam1,Wnt11,Zfp703
GO Biological Process	GO:0051272	positive regulation of cellular component movement	35	2.689033e-5	3.457559e-1	9.878739e-3	2.944733e+0	5.773018e+0	17	67	9.714286e-2	2.537313e-1	6	14	450	CpG_1693,CpG_257,CpG_258,CpG_259,CpG_40,CpG_41,CpG_42,CpG_640,CpG_766,CpG_990,CpG_991,CpG_994,CpG_995,CpG_996,CpG_997,CpG_998,CpG_999	CpG_1220,CpG_136,CpG_137,CpG_138,CpG_139,CpG_140,CpG_141,CpG_142,CpG_143,CpG_144,CpG_145,CpG_146,CpG_1518,CpG_1519,CpG_1520,CpG_1521,CpG_1688,CpG_1689,CpG_1690,CpG_1691,CpG_1692,CpG_1693,CpG_1738,CpG_1739,CpG_1740,CpG_1741,CpG_257,CpG_258,CpG_259,CpG_305,CpG_306,CpG_307,CpG_31,CpG_32,CpG_33,CpG_34,CpG_40,CpG_41,CpG_42,CpG_640,CpG_641,CpG_642,CpG_731,CpG_732,CpG_733,CpG_734,CpG_735,CpG_736,CpG_763…	Bcas3,Fbln1,Phpt1,Tgfb2,Tiam1,Wnt11	Bcas3,Ccbe1,Ccr7,Csf1,Fbln1,Gli1,Lrrc15,Phpt1,Ptprc,Tacr1,Tgfb2,Tiam1,Wnt11,Zfp703
GO Biological Process	GO:0097340	inhibition of cysteine-type endopeptidase activity	38	3.211793e-5	4.129723e-1	1.086769e-2	5.461513e+0	1.464796e+0	8	17	4.571429e-2	4.705882e-1	1	1	14	CpG_1815,CpG_1816,CpG_1818,CpG_1820,CpG_1822,CpG_1824,CpG_1826,CpG_1828	CpG_1815,CpG_1816,CpG_1817,CpG_1818,CpG_1819,CpG_1820,CpG_1821,CpG_1822,CpG_1823,CpG_1824,CpG_1825,CpG_1826,CpG_1827,CpG_1828,CpG_1829,CpG_1830,CpG_1831	Nol3	Nol3
GO Biological Process	GO:1900037	regulation of cellular response to hypoxia	38	3.211793e-5	4.129723e-1	1.086769e-2	5.461513e+0	1.464796e+0	8	17	4.571429e-2	4.705882e-1	1	1	13	CpG_1815,CpG_1816,CpG_1818,CpG_1820,CpG_1822,CpG_1824,CpG_1826,CpG_1828	CpG_1815,CpG_1816,CpG_1817,CpG_1818,CpG_1819,CpG_1820,CpG_1821,CpG_1822,CpG_1823,CpG_1824,CpG_1825,CpG_1826,CpG_1827,CpG_1828,CpG_1829,CpG_1830,CpG_1831	Nol3	Nol3
GO Biological Process	GO:0090201	negative regulation of release of cytochrome c from mitochondria	38	3.211793e-5	4.129723e-1	1.086769e-2	5.461513e+0	1.464796e+0	8	17	4.571429e-2	4.705882e-1	1	1	18	CpG_1815,CpG_1816,CpG_1818,CpG_1820,CpG_1822,CpG_1824,CpG_1826,CpG_1828	CpG_1815,CpG_1816,CpG_1817,CpG_1818,CpG_1819,CpG_1820,CpG_1821,CpG_1822,CpG_1823,CpG_1824,CpG_1825,CpG_1826,CpG_1827,CpG_1828,CpG_1829,CpG_1830,CpG_1831	Nol3	Nol3
GO Biological Process	GO:0070296	sarcoplasmic reticulum calcium ion transport	38	3.211793e-5	4.129723e-1	1.086769e-2	5.461513e+0	1.464796e+0	8	17	4.571429e-2	4.705882e-1	1	1	10	CpG_1815,CpG_1816,CpG_1818,CpG_1820,CpG_1822,CpG_1824,CpG_1826,CpG_1828	CpG_1815,CpG_1816,CpG_1817,CpG_1818,CpG_1819,CpG_1820,CpG_1821,CpG_1822,CpG_1823,CpG_1824,CpG_1825,CpG_1826,CpG_1827,CpG_1828,CpG_1829,CpG_1830,CpG_1831	Nol3	Nol3
GO Biological Process	GO:0070076	histone lysine demethylation	38	3.211793e-5	4.129723e-1	1.086769e-2	5.461513e+0	1.464796e+0	8	17	4.571429e-2	4.705882e-1	1	1	29	CpG_1815,CpG_1816,CpG_1818,CpG_1820,CpG_1822,CpG_1824,CpG_1826,CpG_1828	CpG_1815,CpG_1816,CpG_1817,CpG_1818,CpG_1819,CpG_1820,CpG_1821,CpG_1822,CpG_1823,CpG_1824,CpG_1825,CpG_1826,CpG_1827,CpG_1828,CpG_1829,CpG_1830,CpG_1831	Hsf4	Hsf4
GO Biological Process	GO:1900038	negative regulation of cellular response to hypoxia	38	3.211793e-5	4.129723e-1	1.086769e-2	5.461513e+0	1.464796e+0	8	17	4.571429e-2	4.705882e-1	1	1	8	CpG_1815,CpG_1816,CpG_1818,CpG_1820,CpG_1822,CpG_1824,CpG_1826,CpG_1828	CpG_1815,CpG_1816,CpG_1817,CpG_1818,CpG_1819,CpG_1820,CpG_1821,CpG_1822,CpG_1823,CpG_1824,CpG_1825,CpG_1826,CpG_1827,CpG_1828,CpG_1829,CpG_1830,CpG_1831	Nol3	Nol3
GO Biological Process	GO:0070988	demethylation	38	3.211793e-5	4.129723e-1	1.086769e-2	5.461513e+0	1.464796e+0	8	17	4.571429e-2	4.705882e-1	1	1	51	CpG_1815,CpG_1816,CpG_1818,CpG_1820,CpG_1822,CpG_1824,CpG_1826,CpG_1828	CpG_1815,CpG_1816,CpG_1817,CpG_1818,CpG_1819,CpG_1820,CpG_1821,CpG_1822,CpG_1823,CpG_1824,CpG_1825,CpG_1826,CpG_1827,CpG_1828,CpG_1829,CpG_1830,CpG_1831	Hsf4	Hsf4
GO Biological Process	GO:2001243	negative regulation of intrinsic apoptotic signaling pathway	38	3.211793e-5	4.129723e-1	1.086769e-2	5.461513e+0	1.464796e+0	8	17	4.571429e-2	4.705882e-1	1	1	89	CpG_1815,CpG_1816,CpG_1818,CpG_1820,CpG_1822,CpG_1824,CpG_1826,CpG_1828	CpG_1815,CpG_1816,CpG_1817,CpG_1818,CpG_1819,CpG_1820,CpG_1821,CpG_1822,CpG_1823,CpG_1824,CpG_1825,CpG_1826,CpG_1827,CpG_1828,CpG_1829,CpG_1830,CpG_1831	Nol3	Nol3
GO Biological Process	GO:2000117	negative regulation of cysteine-type endopeptidase activity	38	3.211793e-5	4.129723e-1	1.086769e-2	5.461513e+0	1.464796e+0	8	17	4.571429e-2	4.705882e-1	1	1	106	CpG_1815,CpG_1816,CpG_1818,CpG_1820,CpG_1822,CpG_1824,CpG_1826,CpG_1828	CpG_1815,CpG_1816,CpG_1817,CpG_1818,CpG_1819,CpG_1820,CpG_1821,CpG_1822,CpG_1823,CpG_1824,CpG_1825,CpG_1826,CpG_1827,CpG_1828,CpG_1829,CpG_1830,CpG_1831	Nol3	Nol3
GO Biological Process	GO:0060547	negative regulation of necrotic cell death	38	3.211793e-5	4.129723e-1	1.086769e-2	5.461513e+0	1.464796e+0	8	17	4.571429e-2	4.705882e-1	1	1	17	CpG_1815,CpG_1816,CpG_1818,CpG_1820,CpG_1822,CpG_1824,CpG_1826,CpG_1828	CpG_1815,CpG_1816,CpG_1817,CpG_1818,CpG_1819,CpG_1820,CpG_1821,CpG_1822,CpG_1823,CpG_1824,CpG_1825,CpG_1826,CpG_1827,CpG_1828,CpG_1829,CpG_1830,CpG_1831	Nol3	Nol3
GO Biological Process	GO:1990001	inhibition of cysteine-type endopeptidase activity involved in apoptotic process	38	3.211793e-5	4.129723e-1	1.086769e-2	5.461513e+0	1.464796e+0	8	17	4.571429e-2	4.705882e-1	1	1	13	CpG_1815,CpG_1816,CpG_1818,CpG_1820,CpG_1822,CpG_1824,CpG_1826,CpG_1828	CpG_1815,CpG_1816,CpG_1817,CpG_1818,CpG_1819,CpG_1820,CpG_1821,CpG_1822,CpG_1823,CpG_1824,CpG_1825,CpG_1826,CpG_1827,CpG_1828,CpG_1829,CpG_1830,CpG_1831	Nol3	Nol3
GO Biological Process	GO:1903514	calcium ion transport from endoplasmic reticulum to cytosol	38	3.211793e-5	4.129723e-1	1.086769e-2	5.461513e+0	1.464796e+0	8	17	4.571429e-2	4.705882e-1	1	1	8	CpG_1815,CpG_1816,CpG_1818,CpG_1820,CpG_1822,CpG_1824,CpG_1826,CpG_1828	CpG_1815,CpG_1816,CpG_1817,CpG_1818,CpG_1819,CpG_1820,CpG_1821,CpG_1822,CpG_1823,CpG_1824,CpG_1825,CpG_1826,CpG_1827,CpG_1828,CpG_1829,CpG_1830,CpG_1831	Nol3	Nol3
GO Biological Process	GO:1902176	negative regulation of oxidative stress-induced intrinsic apoptotic signaling pathway	38	3.211793e-5	4.129723e-1	1.086769e-2	5.461513e+0	1.464796e+0	8	17	4.571429e-2	4.705882e-1	1	1	17	CpG_1815,CpG_1816,CpG_1818,CpG_1820,CpG_1822,CpG_1824,CpG_1826,CpG_1828	CpG_1815,CpG_1816,CpG_1817,CpG_1818,CpG_1819,CpG_1820,CpG_1821,CpG_1822,CpG_1823,CpG_1824,CpG_1825,CpG_1826,CpG_1827,CpG_1828,CpG_1829,CpG_1830,CpG_1831	Nol3	Nol3
GO Biological Process	GO:1903298	negative regulation of hypoxia-induced intrinsic apoptotic signaling pathway	38	3.211793e-5	4.129723e-1	1.086769e-2	5.461513e+0	1.464796e+0	8	17	4.571429e-2	4.705882e-1	1	1	4	CpG_1815,CpG_1816,CpG_1818,CpG_1820,CpG_1822,CpG_1824,CpG_1826,CpG_1828	CpG_1815,CpG_1816,CpG_1817,CpG_1818,CpG_1819,CpG_1820,CpG_1821,CpG_1822,CpG_1823,CpG_1824,CpG_1825,CpG_1826,CpG_1827,CpG_1828,CpG_1829,CpG_1830,CpG_1831	Nol3	Nol3
GO Biological Process	GO:1902109	negative regulation of mitochondrial membrane permeability involved in apoptotic process	38	3.211793e-5	4.129723e-1	1.086769e-2	5.461513e+0	1.464796e+0	8	17	4.571429e-2	4.705882e-1	1	1	3	CpG_1815,CpG_1816,CpG_1818,CpG_1820,CpG_1822,CpG_1824,CpG_1826,CpG_1828	CpG_1815,CpG_1816,CpG_1817,CpG_1818,CpG_1819,CpG_1820,CpG_1821,CpG_1822,CpG_1823,CpG_1824,CpG_1825,CpG_1826,CpG_1827,CpG_1828,CpG_1829,CpG_1830,CpG_1831	Nol3	Nol3
GO Biological Process	GO:0016577	histone demethylation	38	3.211793e-5	4.129723e-1	1.086769e-2	5.461513e+0	1.464796e+0	8	17	4.571429e-2	4.705882e-1	1	1	30	CpG_1815,CpG_1816,CpG_1818,CpG_1820,CpG_1822,CpG_1824,CpG_1826,CpG_1828	CpG_1815,CpG_1816,CpG_1817,CpG_1818,CpG_1819,CpG_1820,CpG_1821,CpG_1822,CpG_1823,CpG_1824,CpG_1825,CpG_1826,CpG_1827,CpG_1828,CpG_1829,CpG_1830,CpG_1831	Hsf4	Hsf4
GO Biological Process	GO:0014735	regulation of muscle atrophy	38	3.211793e-5	4.129723e-1	1.086769e-2	5.461513e+0	1.464796e+0	8	17	4.571429e-2	4.705882e-1	1	1	3	CpG_1815,CpG_1816,CpG_1818,CpG_1820,CpG_1822,CpG_1824,CpG_1826,CpG_1828	CpG_1815,CpG_1816,CpG_1817,CpG_1818,CpG_1819,CpG_1820,CpG_1821,CpG_1822,CpG_1823,CpG_1824,CpG_1825,CpG_1826,CpG_1827,CpG_1828,CpG_1829,CpG_1830,CpG_1831	Nol3	Nol3
GO Biological Process	GO:0014736	negative regulation of muscle atrophy	38	3.211793e-5	4.129723e-1	1.086769e-2	5.461513e+0	1.464796e+0	8	17	4.571429e-2	4.705882e-1	1	1	2	CpG_1815,CpG_1816,CpG_1818,CpG_1820,CpG_1822,CpG_1824,CpG_1826,CpG_1828	CpG_1815,CpG_1816,CpG_1817,CpG_1818,CpG_1819,CpG_1820,CpG_1821,CpG_1822,CpG_1823,CpG_1824,CpG_1825,CpG_1826,CpG_1827,CpG_1828,CpG_1829,CpG_1830,CpG_1831	Nol3	Nol3
GO Biological Process	GO:0043154	negative regulation of cysteine-type endopeptidase activity involved in apoptotic process	38	3.211793e-5	4.129723e-1	1.086769e-2	5.461513e+0	1.464796e+0	8	17	4.571429e-2	4.705882e-1	1	1	90	CpG_1815,CpG_1816,CpG_1818,CpG_1820,CpG_1822,CpG_1824,CpG_1826,CpG_1828	CpG_1815,CpG_1816,CpG_1817,CpG_1818,CpG_1819,CpG_1820,CpG_1821,CpG_1822,CpG_1823,CpG_1824,CpG_1825,CpG_1826,CpG_1827,CpG_1828,CpG_1829,CpG_1830,CpG_1831	Nol3	Nol3
GO Biological Process	GO:0010939	regulation of necrotic cell death	38	3.211793e-5	4.129723e-1	1.086769e-2	5.461513e+0	1.464796e+0	8	17	4.571429e-2	4.705882e-1	1	1	23	CpG_1815,CpG_1816,CpG_1818,CpG_1820,CpG_1822,CpG_1824,CpG_1826,CpG_1828	CpG_1815,CpG_1816,CpG_1817,CpG_1818,CpG_1819,CpG_1820,CpG_1821,CpG_1822,CpG_1823,CpG_1824,CpG_1825,CpG_1826,CpG_1827,CpG_1828,CpG_1829,CpG_1830,CpG_1831	Nol3	Nol3
GO Biological Process	GO:0006376	mRNA splice site selection	38	3.211793e-5	4.129723e-1	1.086769e-2	5.461513e+0	1.464796e+0	8	17	4.571429e-2	4.705882e-1	1	1	23	CpG_1815,CpG_1816,CpG_1818,CpG_1820,CpG_1822,CpG_1824,CpG_1826,CpG_1828	CpG_1815,CpG_1816,CpG_1817,CpG_1818,CpG_1819,CpG_1820,CpG_1821,CpG_1822,CpG_1823,CpG_1824,CpG_1825,CpG_1826,CpG_1827,CpG_1828,CpG_1829,CpG_1830,CpG_1831	Nol3	Nol3
GO Biological Process	GO:0006482	protein demethylation	38	3.211793e-5	4.129723e-1	1.086769e-2	5.461513e+0	1.464796e+0	8	17	4.571429e-2	4.705882e-1	1	1	32	CpG_1815,CpG_1816,CpG_1818,CpG_1820,CpG_1822,CpG_1824,CpG_1826,CpG_1828	CpG_1815,CpG_1816,CpG_1817,CpG_1818,CpG_1819,CpG_1820,CpG_1821,CpG_1822,CpG_1823,CpG_1824,CpG_1825,CpG_1826,CpG_1827,CpG_1828,CpG_1829,CpG_1830,CpG_1831	Hsf4	Hsf4
GO Biological Process	GO:0014745	negative regulation of muscle adaptation	38	3.211793e-5	4.129723e-1	1.086769e-2	5.461513e+0	1.464796e+0	8	17	4.571429e-2	4.705882e-1	1	1	11	CpG_1815,CpG_1816,CpG_1818,CpG_1820,CpG_1822,CpG_1824,CpG_1826,CpG_1828	CpG_1815,CpG_1816,CpG_1817,CpG_1818,CpG_1819,CpG_1820,CpG_1821,CpG_1822,CpG_1823,CpG_1824,CpG_1825,CpG_1826,CpG_1827,CpG_1828,CpG_1829,CpG_1830,CpG_1831	Nol3	Nol3
GO Biological Process	GO:0010951	negative regulation of endopeptidase activity	38	3.211793e-5	4.129723e-1	1.086769e-2	5.461513e+0	1.464796e+0	8	17	4.571429e-2	4.705882e-1	1	1	272	CpG_1815,CpG_1816,CpG_1818,CpG_1820,CpG_1822,CpG_1824,CpG_1826,CpG_1828	CpG_1815,CpG_1816,CpG_1817,CpG_1818,CpG_1819,CpG_1820,CpG_1821,CpG_1822,CpG_1823,CpG_1824,CpG_1825,CpG_1826,CpG_1827,CpG_1828,CpG_1829,CpG_1830,CpG_1831	Nol3	Nol3
GO Biological Process	GO:0035795	negative regulation of mitochondrial membrane permeability	38	3.211793e-5	4.129723e-1	1.086769e-2	5.461513e+0	1.464796e+0	8	17	4.571429e-2	4.705882e-1	1	1	4	CpG_1815,CpG_1816,CpG_1818,CpG_1820,CpG_1822,CpG_1824,CpG_1826,CpG_1828	CpG_1815,CpG_1816,CpG_1817,CpG_1818,CpG_1819,CpG_1820,CpG_1821,CpG_1822,CpG_1823,CpG_1824,CpG_1825,CpG_1826,CpG_1827,CpG_1828,CpG_1829,CpG_1830,CpG_1831	Nol3	Nol3
GO Biological Process	GO:0014808	release of sequestered calcium ion into cytosol by sarcoplasmic reticulum	38	3.211793e-5	4.129723e-1	1.086769e-2	5.461513e+0	1.464796e+0	8	17	4.571429e-2	4.705882e-1	1	1	7	CpG_1815,CpG_1816,CpG_1818,CpG_1820,CpG_1822,CpG_1824,CpG_1826,CpG_1828	CpG_1815,CpG_1816,CpG_1817,CpG_1818,CpG_1819,CpG_1820,CpG_1821,CpG_1822,CpG_1823,CpG_1824,CpG_1825,CpG_1826,CpG_1827,CpG_1828,CpG_1829,CpG_1830,CpG_1831	Nol3	Nol3
GO Biological Process	GO:0033169	histone H3-K9 demethylation	38	3.211793e-5	4.129723e-1	1.086769e-2	5.461513e+0	1.464796e+0	8	17	4.571429e-2	4.705882e-1	1	1	13	CpG_1815,CpG_1816,CpG_1818,CpG_1820,CpG_1822,CpG_1824,CpG_1826,CpG_1828	CpG_1815,CpG_1816,CpG_1817,CpG_1818,CpG_1819,CpG_1820,CpG_1821,CpG_1822,CpG_1823,CpG_1824,CpG_1825,CpG_1826,CpG_1827,CpG_1828,CpG_1829,CpG_1830,CpG_1831	Hsf4	Hsf4
GO Biological Process	GO:0000245	spliceosomal complex assembly	38	3.211793e-5	4.129723e-1	1.086769e-2	5.461513e+0	1.464796e+0	8	17	4.571429e-2	4.705882e-1	1	1	44	CpG_1815,CpG_1816,CpG_1818,CpG_1820,CpG_1822,CpG_1824,CpG_1826,CpG_1828	CpG_1815,CpG_1816,CpG_1817,CpG_1818,CpG_1819,CpG_1820,CpG_1821,CpG_1822,CpG_1823,CpG_1824,CpG_1825,CpG_1826,CpG_1827,CpG_1828,CpG_1829,CpG_1830,CpG_1831	Nol3	Nol3
GO Biological Process	GO:0014874	response to stimulus involved in regulation of muscle adaptation	38	3.211793e-5	4.129723e-1	1.086769e-2	5.461513e+0	1.464796e+0	8	17	4.571429e-2	4.705882e-1	1	1	16	CpG_1815,CpG_1816,CpG_1818,CpG_1820,CpG_1822,CpG_1824,CpG_1826,CpG_1828	CpG_1815,CpG_1816,CpG_1817,CpG_1818,CpG_1819,CpG_1820,CpG_1821,CpG_1822,CpG_1823,CpG_1824,CpG_1825,CpG_1826,CpG_1827,CpG_1828,CpG_1829,CpG_1830,CpG_1831	Nol3	Nol3
GO Biological Process	GO:0014876	response to injury involved in regulation of muscle adaptation	38	3.211793e-5	4.129723e-1	1.086769e-2	5.461513e+0	1.464796e+0	8	17	4.571429e-2	4.705882e-1	1	1	1	CpG_1815,CpG_1816,CpG_1818,CpG_1820,CpG_1822,CpG_1824,CpG_1826,CpG_1828	CpG_1815,CpG_1816,CpG_1817,CpG_1818,CpG_1819,CpG_1820,CpG_1821,CpG_1822,CpG_1823,CpG_1824,CpG_1825,CpG_1826,CpG_1827,CpG_1828,CpG_1829,CpG_1830,CpG_1831	Nol3	Nol3
GO Biological Process	GO:0090277	positive regulation of peptide hormone secretion	68	3.974475e-5	5.110380e-1	7.515265e-3	4.747792e+0	1.895618e+0	9	22	5.142857e-2	4.090909e-1	2	3	92	CpG_235,CpG_990,CpG_991,CpG_994,CpG_995,CpG_996,CpG_997,CpG_998,CpG_999	CpG_1415,CpG_1416,CpG_1417,CpG_1418,CpG_1419,CpG_1420,CpG_234,CpG_235,CpG_236,CpG_237,CpG_238,CpG_239,CpG_990,CpG_991,CpG_992,CpG_993,CpG_994,CpG_995,CpG_996,CpG_997,CpG_998,CpG_999	Doc2b,Phpt1	Doc2b,Nkx6-1,Phpt1
GO Biological Process	GO:0043062	extracellular structure organization	68	3.974475e-5	5.110380e-1	7.515265e-3	4.747792e+0	1.895618e+0	9	22	5.142857e-2	4.090909e-1	4	4	185	CpG_1840,CpG_1841,CpG_1842,CpG_1843,CpG_207,CpG_40,CpG_41,CpG_42,CpG_640	CpG_1839,CpG_1840,CpG_1841,CpG_1842,CpG_1843,CpG_1844,CpG_1845,CpG_203,CpG_204,CpG_205,CpG_206,CpG_207,CpG_208,CpG_209,CpG_210,CpG_211,CpG_40,CpG_41,CpG_42,CpG_640,CpG_641,CpG_642	Fbln1,Has3,Tgfb2,Wnt3a	Fbln1,Has3,Tgfb2,Wnt3a
GO Biological Process	GO:0002793	positive regulation of peptide secretion	68	3.974475e-5	5.110380e-1	7.515265e-3	4.747792e+0	1.895618e+0	9	22	5.142857e-2	4.090909e-1	2	3	96	CpG_235,CpG_990,CpG_991,CpG_994,CpG_995,CpG_996,CpG_997,CpG_998,CpG_999	CpG_1415,CpG_1416,CpG_1417,CpG_1418,CpG_1419,CpG_1420,CpG_234,CpG_235,CpG_236,CpG_237,CpG_238,CpG_239,CpG_990,CpG_991,CpG_992,CpG_993,CpG_994,CpG_995,CpG_996,CpG_997,CpG_998,CpG_999	Doc2b,Phpt1	Doc2b,Nkx6-1,Phpt1
GO Biological Process	GO:0032024	positive regulation of insulin secretion	68	3.974475e-5	5.110380e-1	7.515265e-3	4.747792e+0	1.895618e+0	9	22	5.142857e-2	4.090909e-1	2	3	71	CpG_235,CpG_990,CpG_991,CpG_994,CpG_995,CpG_996,CpG_997,CpG_998,CpG_999	CpG_1415,CpG_1416,CpG_1417,CpG_1418,CpG_1419,CpG_1420,CpG_234,CpG_235,CpG_236,CpG_237,CpG_238,CpG_239,CpG_990,CpG_991,CpG_992,CpG_993,CpG_994,CpG_995,CpG_996,CpG_997,CpG_998,CpG_999	Doc2b,Phpt1	Doc2b,Nkx6-1,Phpt1
GO Biological Process	GO:0030198	extracellular matrix organization	68	3.974475e-5	5.110380e-1	7.515265e-3	4.747792e+0	1.895618e+0	9	22	5.142857e-2	4.090909e-1	4	4	184	CpG_1840,CpG_1841,CpG_1842,CpG_1843,CpG_207,CpG_40,CpG_41,CpG_42,CpG_640	CpG_1839,CpG_1840,CpG_1841,CpG_1842,CpG_1843,CpG_1844,CpG_1845,CpG_203,CpG_204,CpG_205,CpG_206,CpG_207,CpG_208,CpG_209,CpG_210,CpG_211,CpG_40,CpG_41,CpG_42,CpG_640,CpG_641,CpG_642	Fbln1,Has3,Tgfb2,Wnt3a	Fbln1,Has3,Tgfb2,Wnt3a
GO Biological Process	GO:0048771	tissue remodeling	73	4.260436e-5	5.478069e-1	7.504204e-3	3.664962e+0	3.274249e+0	12	38	6.857143e-2	3.157895e-1	3	5	110	CpG_1815,CpG_1816,CpG_1818,CpG_1820,CpG_1822,CpG_1824,CpG_1826,CpG_1828,CpG_40,CpG_41,CpG_42,CpG_84	CpG_1068,CpG_1069,CpG_1070,CpG_1071,CpG_1072,CpG_1073,CpG_1074,CpG_1075,CpG_1076,CpG_1815,CpG_1816,CpG_1817,CpG_1818,CpG_1819,CpG_1820,CpG_1821,CpG_1822,CpG_1823,CpG_1824,CpG_1825,CpG_1826,CpG_1827,CpG_1828,CpG_1829,CpG_1830,CpG_1831,CpG_40,CpG_41,CpG_42,CpG_83,CpG_84,CpG_959,CpG_960,CpG_961,CpG_962,CpG_963,CpG_964,CpG_965	Efna2,Nol3,Tgfb2	Dll4,Efna2,Fgf8,Nol3,Tgfb2
GO Biological Process	GO:2001236	regulation of extrinsic apoptotic signaling pathway	74	4.392177e-5	5.647461e-1	7.631704e-3	3.249600e+0	4.308223e+0	14	50	8.000000e-2	2.800000e-1	3	6	166	CpG_1815,CpG_1816,CpG_1818,CpG_1820,CpG_1822,CpG_1824,CpG_1826,CpG_1828,CpG_40,CpG_41,CpG_42,CpG_501,CpG_502,CpG_504	CpG_1083,CpG_1084,CpG_1085,CpG_1086,CpG_1087,CpG_1088,CpG_1089,CpG_1090,CpG_1091,CpG_1092,CpG_1093,CpG_1094,CpG_1095,CpG_1096,CpG_1097,CpG_1098,CpG_1773,CpG_1774,CpG_1775,CpG_1776,CpG_1777,CpG_1815,CpG_1816,CpG_1817,CpG_1818,CpG_1819,CpG_1820,CpG_1821,CpG_1822,CpG_1823,CpG_1824,CpG_1825,CpG_1826,CpG_1827,CpG_1828,CpG_1829,CpG_1830,CpG_1831,CpG_31,CpG_32,CpG_33,CpG_34,CpG_40,CpG_41,CpG_42,CpG_500,…	Dapk1,Nol3,Tgfb2	Cyld,Dapk1,Nol3,Ptprc,Stk4,Tgfb2
GO Biological Process	GO:0050856	regulation of T cell receptor signaling pathway	75	5.359337e-5	6.891036e-1	9.188047e-3	5.158095e+0	1.550960e+0	8	18	4.571429e-2	4.444444e-1	1	3	40	CpG_990,CpG_991,CpG_994,CpG_995,CpG_996,CpG_997,CpG_998,CpG_999	CpG_1773,CpG_1774,CpG_1775,CpG_1776,CpG_1777,CpG_305,CpG_306,CpG_307,CpG_990,CpG_991,CpG_992,CpG_993,CpG_994,CpG_995,CpG_996,CpG_997,CpG_998,CpG_999	Phpt1	Ccr7,Cyld,Phpt1
GO Biological Process	GO:0097191	extrinsic apoptotic signaling pathway	76	5.903103e-5	7.590210e-1	9.987118e-3	6.963429e+0	8.616445e-1	6	10	3.428571e-2	6.000000e-1	2	3	93	CpG_40,CpG_41,CpG_42,CpG_501,CpG_502,CpG_504	CpG_1077,CpG_1078,CpG_40,CpG_41,CpG_42,CpG_500,CpG_501,CpG_502,CpG_503,CpG_504	Dapk1,Tgfb2	Bcl2l11,Dapk1,Tgfb2
GO Biological Process	GO:0051493	regulation of cytoskeleton organization	77	6.056843e-5	7.787889e-1	1.011414e-2	2.778833e+0	6.117676e+0	17	71	9.714286e-2	2.394366e-1	7	14	454	CpG_1693,CpG_1927,CpG_207,CpG_257,CpG_258,CpG_259,CpG_40,CpG_41,CpG_42,CpG_990,CpG_991,CpG_994,CpG_995,CpG_996,CpG_997,CpG_998,CpG_999	CpG_115,CpG_116,CpG_117,CpG_118,CpG_119,CpG_1518,CpG_1519,CpG_1520,CpG_1521,CpG_165,CpG_166,CpG_167,CpG_168,CpG_1688,CpG_1689,CpG_169,CpG_1690,CpG_1691,CpG_1692,CpG_1693,CpG_1694,CpG_1695,CpG_1696,CpG_1697,CpG_1698,CpG_1699,CpG_170,CpG_171,CpG_1773,CpG_1774,CpG_1775,CpG_1776,CpG_1777,CpG_1925,CpG_1926,CpG_1927,CpG_1928,CpG_1929,CpG_203,CpG_204,CpG_205,CpG_206,CpG_207,CpG_208,CpG_209,CpG_210,CpG_2…	Arf1,Bcas3,Kank2,Phpt1,Tgfb2,Wnt11,Wnt3a	Arf1,Bcas3,Cyld,Kank2,Mdm1,Npm1,Numa1,Phpt1,Sh3bp1,Tacr1,Tgfb2,Trim36,Wnt11,Wnt3a
GO Biological Process	GO:0000381	regulation of alternative mRNA splicing, via spliceosome	78	8.185791e-5	1.000000e+0	1.349396e-2	8.289796e+0	6.031512e-1	5	7	2.857143e-2	7.142857e-1	1	1	42	CpG_101,CpG_102,CpG_103,CpG_105,CpG_106	CpG_101,CpG_102,CpG_103,CpG_104,CpG_105,CpG_106,CpG_107	Celf5	Celf5
GO Biological Process	GO:0097193	intrinsic apoptotic signaling pathway	79	8.581961e-5	1.000000e+0	1.396796e-2	4.886617e+0	1.637125e+0	8	19	4.571429e-2	4.210526e-1	1	2	158	CpG_1815,CpG_1816,CpG_1818,CpG_1820,CpG_1822,CpG_1824,CpG_1826,CpG_1828	CpG_1077,CpG_1078,CpG_1815,CpG_1816,CpG_1817,CpG_1818,CpG_1819,CpG_1820,CpG_1821,CpG_1822,CpG_1823,CpG_1824,CpG_1825,CpG_1826,CpG_1827,CpG_1828,CpG_1829,CpG_1830,CpG_1831	Nol3	Bcl2l11,Nol3
GO Biological Process	GO:0007204	positive regulation of cytosolic calcium ion concentration	80	9.482815e-5	1.000000e+0	1.524125e-2	3.647510e+0	3.015756e+0	11	35	6.285714e-2	3.142857e-1	3	5	193	CpG_1539,CpG_1540,CpG_1815,CpG_1816,CpG_1818,CpG_1820,CpG_1822,CpG_1824,CpG_1826,CpG_1828,CpG_358	CpG_1518,CpG_1519,CpG_1520,CpG_1521,CpG_1539,CpG_1540,CpG_1541,CpG_1542,CpG_1543,CpG_1815,CpG_1816,CpG_1817,CpG_1818,CpG_1819,CpG_1820,CpG_1821,CpG_1822,CpG_1823,CpG_1824,CpG_1825,CpG_1826,CpG_1827,CpG_1828,CpG_1829,CpG_1830,CpG_1831,CpG_31,CpG_32,CpG_33,CpG_34,CpG_358,CpG_359,CpG_360,CpG_361,CpG_362	C1qtnf1,Gata2,Nol3	C1qtnf1,Gata2,Nol3,Ptprc,Tacr1
GO Biological Process	GO:0032880	regulation of protein localization	81	9.680042e-5	1.000000e+0	1.536617e-2	2.027504e+0	1.430330e+1	29	166	1.657143e-1	1.746988e-1	14	27	988	CpG_1322,CpG_1433,CpG_1815,CpG_1816,CpG_1818,CpG_1820,CpG_1822,CpG_1824,CpG_1826,CpG_1828,CpG_2000,CpG_207,CpG_235,CpG_257,CpG_258,CpG_259,CpG_27,CpG_40,CpG_41,CpG_42,CpG_640,CpG_990,CpG_991,CpG_994,CpG_995,CpG_996,CpG_997,CpG_998,CpG_999	CpG_1222,CpG_1223,CpG_1224,CpG_1322,CpG_1323,CpG_1415,CpG_1416,CpG_1417,CpG_1418,CpG_1419,CpG_1420,CpG_1431,CpG_1432,CpG_1433,CpG_1434,CpG_1435,CpG_1436,CpG_1437,CpG_1438,CpG_1439,CpG_1554,CpG_1555,CpG_1556,CpG_1557,CpG_1558,CpG_1559,CpG_1560,CpG_1561,CpG_1562,CpG_1563,CpG_165,CpG_166,CpG_167,CpG_168,CpG_169,CpG_1694,CpG_1695,CpG_1696,CpG_1697,CpG_1698,CpG_1699,CpG_170,CpG_171,CpG_1773,CpG_1774,C…	Arf1,Atpif1,Bcas3,Dnajb2,Doc2b,Fbln1,Lyplal1,Nol3,Phpt1,Rph3al,Sirt4,Tgfb2,Wnt3a,Zic1	Arf1,Atpif1,Axin2,Bcas3,Cadm1,Ccr7,Cyld,Ddx58,Dnajb2,Doc2b,Fbln1,Il17ra,Kcne1,Lrrc15,Lyplal1,Nkx6-1,Nod2,Nol3,Npm1,Numa1,Phpt1,Rph3al,Sec16b,Sirt4,Tgfb2,Wnt3a,Zic1
GO Biological Process	GO:2000826	regulation of heart morphogenesis	82	1.112770e-4	1.000000e+0	1.744878e-2	5.416000e+0	1.292467e+0	7	15	4.000000e-2	4.666667e-1	3	3	36	CpG_207,CpG_257,CpG_258,CpG_259,CpG_40,CpG_41,CpG_42	CpG_203,CpG_204,CpG_205,CpG_206,CpG_207,CpG_208,CpG_209,CpG_210,CpG_211,CpG_257,CpG_258,CpG_259,CpG_40,CpG_41,CpG_42	Tbx2,Tgfb2,Wnt3a	Tbx2,Tgfb2,Wnt3a
GO Biological Process	GO:0048566	embryonic digestive tract development	83	1.206235e-4	1.000000e+0	1.868647e-2	6.330390e+0	9.478090e-1	6	11	3.428571e-2	5.454545e-1	2	2	36	CpG_1972,CpG_1977,CpG_1978,CpG_40,CpG_41,CpG_42	CpG_1971,CpG_1972,CpG_1973,CpG_1974,CpG_1975,CpG_1976,CpG_1977,CpG_1978,CpG_40,CpG_41,CpG_42	Rbpms2,Tgfb2	Rbpms2,Tgfb2
GO Biological Process	GO:0001974	blood vessel remodeling	84	1.264381e-4	1.000000e+0	1.935406e-2	3.546190e+0	3.101920e+0	11	36	6.285714e-2	3.055556e-1	2	4	42	CpG_1815,CpG_1816,CpG_1818,CpG_1820,CpG_1822,CpG_1824,CpG_1826,CpG_1828,CpG_40,CpG_41,CpG_42	CpG_1068,CpG_1069,CpG_1070,CpG_1071,CpG_1072,CpG_1073,CpG_1074,CpG_1075,CpG_1076,CpG_1815,CpG_1816,CpG_1817,CpG_1818,CpG_1819,CpG_1820,CpG_1821,CpG_1822,CpG_1823,CpG_1824,CpG_1825,CpG_1826,CpG_1827,CpG_1828,CpG_1829,CpG_1830,CpG_1831,CpG_40,CpG_41,CpG_42,CpG_959,CpG_960,CpG_961,CpG_962,CpG_963,CpG_964,CpG_965	Nol3,Tgfb2	Dll4,Fgf8,Nol3,Tgfb2
GO Biological Process	GO:0010659	cardiac muscle cell apoptotic process	85	1.326093e-4	1.000000e+0	2.005989e-2	4.642286e+0	1.723289e+0	8	20	4.571429e-2	4.000000e-1	1	2	6	CpG_1815,CpG_1816,CpG_1818,CpG_1820,CpG_1822,CpG_1824,CpG_1826,CpG_1828	CpG_1815,CpG_1816,CpG_1817,CpG_1818,CpG_1819,CpG_1820,CpG_1821,CpG_1822,CpG_1823,CpG_1824,CpG_1825,CpG_1826,CpG_1827,CpG_1828,CpG_1829,CpG_1830,CpG_1831,CpG_781,CpG_782,CpG_783	Nol3	Nol3,Rps6ka2
GO Biological Process	GO:0010657	muscle cell apoptotic process	85	1.326093e-4	1.000000e+0	2.005989e-2	4.642286e+0	1.723289e+0	8	20	4.571429e-2	4.000000e-1	1	2	7	CpG_1815,CpG_1816,CpG_1818,CpG_1820,CpG_1822,CpG_1824,CpG_1826,CpG_1828	CpG_1815,CpG_1816,CpG_1817,CpG_1818,CpG_1819,CpG_1820,CpG_1821,CpG_1822,CpG_1823,CpG_1824,CpG_1825,CpG_1826,CpG_1827,CpG_1828,CpG_1829,CpG_1830,CpG_1831,CpG_781,CpG_782,CpG_783	Nol3	Nol3,Rps6ka2
GO Biological Process	GO:0022604	regulation of cell morphogenesis	87	1.463821e-4	1.000000e+0	2.163426e-2	2.259520e+0	9.736583e+0	22	113	1.257143e-1	1.946903e-1	9	17	431	CpG_1471,CpG_1473,CpG_1475,CpG_1477,CpG_1478,CpG_1492,CpG_1493,CpG_1495,CpG_1496,CpG_1497,CpG_161,CpG_162,CpG_164,CpG_1660,CpG_207,CpG_222,CpG_282,CpG_283,CpG_287,CpG_289,CpG_640,CpG_766	CpG_1056,CpG_1057,CpG_1058,CpG_1415,CpG_1416,CpG_1417,CpG_1418,CpG_1419,CpG_1420,CpG_1471,CpG_1472,CpG_1473,CpG_1474,CpG_1475,CpG_1476,CpG_1477,CpG_1478,CpG_1492,CpG_1493,CpG_1494,CpG_1495,CpG_1496,CpG_1497,CpG_1498,CpG_1499,CpG_1500,CpG_1501,CpG_1502,CpG_1503,CpG_1504,CpG_1505,CpG_1506,CpG_1507,CpG_1508,CpG_1595,CpG_1596,CpG_1597,CpG_1598,CpG_1599,CpG_161,CpG_162,CpG_163,CpG_164,CpG_1659,CpG_166…	Bcl11a,Fbln1,Gas7,Mkln1,Srcin1,Tiam1,Ube3a,Wasf3,Wnt3a	Apoe,Bcl11a,Bdnf,Fbln1,Gas7,Mkln1,Nkx6-1,Plxna4,Rgma,Robo1,Srcin1,Tiam1,Trpv2,Ube3a,Vrk1,Wasf3,Wnt3a
GO Biological Process	GO:0050796	regulation of insulin secretion	88	1.565897e-4	1.000000e+0	2.287989e-2	3.743779e+0	2.671098e+0	10	31	5.714286e-2	3.225806e-1	3	4	159	CpG_1433,CpG_235,CpG_990,CpG_991,CpG_994,CpG_995,CpG_996,CpG_997,CpG_998,CpG_999	CpG_1415,CpG_1416,CpG_1417,CpG_1418,CpG_1419,CpG_1420,CpG_1431,CpG_1432,CpG_1433,CpG_1434,CpG_1435,CpG_1436,CpG_1437,CpG_1438,CpG_1439,CpG_234,CpG_235,CpG_236,CpG_237,CpG_238,CpG_239,CpG_990,CpG_991,CpG_992,CpG_993,CpG_994,CpG_995,CpG_996,CpG_997,CpG_998,CpG_999	Doc2b,Phpt1,Sirt4	Doc2b,Nkx6-1,Phpt1,Sirt4
GO Biological Process	GO:0010508	positive regulation of autophagy	88	1.565897e-4	1.000000e+0	2.287989e-2	3.743779e+0	2.671098e+0	10	31	5.714286e-2	3.225806e-1	5	6	94	CpG_1322,CpG_1693,CpG_184,CpG_501,CpG_502,CpG_504,CpG_983,CpG_985,CpG_986,CpG_987	CpG_1322,CpG_1323,CpG_1688,CpG_1689,CpG_1690,CpG_1691,CpG_1692,CpG_1693,CpG_1773,CpG_1774,CpG_1775,CpG_1776,CpG_1777,CpG_184,CpG_185,CpG_186,CpG_187,CpG_188,CpG_189,CpG_500,CpG_501,CpG_502,CpG_503,CpG_504,CpG_983,CpG_984,CpG_985,CpG_986,CpG_987,CpG_988,CpG_989	Atpif1,Dapk1,Irgm1,Pip4k2a,Uvrag	Atpif1,Dapk1,Irgm1,Nod2,Pip4k2a,Uvrag
GO Biological Process	GO:0030258	lipid modification	88	1.565897e-4	1.000000e+0	2.287989e-2	3.743779e+0	2.671098e+0	10	31	5.714286e-2	3.225806e-1	3	4	172	CpG_1640,CpG_1641,CpG_1642,CpG_1644,CpG_723,CpG_730,CpG_983,CpG_985,CpG_986,CpG_987	CpG_1640,CpG_1641,CpG_1642,CpG_1643,CpG_1644,CpG_529,CpG_530,CpG_531,CpG_532,CpG_533,CpG_534,CpG_535,CpG_536,CpG_537,CpG_538,CpG_722,CpG_723,CpG_724,CpG_725,CpG_726,CpG_727,CpG_728,CpG_729,CpG_730,CpG_983,CpG_984,CpG_985,CpG_986,CpG_987,CpG_988,CpG_989	Cpt1c,Dgkg,Pip4k2a	Cpt1c,Dgkg,Hacl1,Pip4k2a
GO Biological Process	GO:0044057	regulation of system process	91	1.678551e-4	1.000000e+0	2.371737e-2	2.239699e+0	9.822747e+0	22	114	1.257143e-1	1.929825e-1	7	18	446	CpG_1471,CpG_1473,CpG_1475,CpG_1477,CpG_1478,CpG_1815,CpG_1816,CpG_1818,CpG_1820,CpG_1822,CpG_1824,CpG_1826,CpG_1828,CpG_257,CpG_258,CpG_259,CpG_315,CpG_358,CpG_40,CpG_41,CpG_42,CpG_766	CpG_1239,CpG_1240,CpG_1241,CpG_1242,CpG_1243,CpG_1471,CpG_1472,CpG_1473,CpG_1474,CpG_1475,CpG_1476,CpG_1477,CpG_1478,CpG_1518,CpG_1519,CpG_1520,CpG_1521,CpG_1617,CpG_1618,CpG_1619,CpG_1620,CpG_1621,CpG_1622,CpG_1623,CpG_1624,CpG_1638,CpG_1639,CpG_165,CpG_166,CpG_1663,CpG_1664,CpG_1665,CpG_1666,CpG_1667,CpG_1668,CpG_1669,CpG_167,CpG_168,CpG_169,CpG_170,CpG_171,CpG_1778,CpG_1779,CpG_1780,CpG_1781,C…	C1qtnf1,Nol3,Sod1,Tbx2,Tgfb2,Wasf3,Wnk4	C1qtnf1,Foxl2,Hspb6,Irx5,Kcne1,Kcnn2,Mef2a,Nol3,Nr4a3,Pi16,Sod1,Tacr1,Tbx2,Tgfb2,Tlx3,Tshz3,Wasf3,Wnk4
GO Biological Process	GO:1903201	regulation of oxidative stress-induced cell death	92	1.840285e-4	1.000000e+0	2.571998e-2	4.017363e+0	2.240276e+0	9	26	5.142857e-2	3.461538e-1	2	3	61	CpG_1815,CpG_1816,CpG_1818,CpG_1820,CpG_1822,CpG_1824,CpG_1826,CpG_1828,CpG_766	CpG_1239,CpG_1240,CpG_1241,CpG_1242,CpG_1243,CpG_1815,CpG_1816,CpG_1817,CpG_1818,CpG_1819,CpG_1820,CpG_1821,CpG_1822,CpG_1823,CpG_1824,CpG_1825,CpG_1826,CpG_1827,CpG_1828,CpG_1829,CpG_1830,CpG_1831,CpG_763,CpG_764,CpG_765,CpG_766	Nol3,Sod1	Nol3,Nr4a3,Sod1
GO Biological Process	GO:0010955	negative regulation of protein processing	92	1.840285e-4	1.000000e+0	2.571998e-2	4.017363e+0	2.240276e+0	9	26	5.142857e-2	3.461538e-1	2	2	43	CpG_1433,CpG_1815,CpG_1816,CpG_1818,CpG_1820,CpG_1822,CpG_1824,CpG_1826,CpG_1828	CpG_1431,CpG_1432,CpG_1433,CpG_1434,CpG_1435,CpG_1436,CpG_1437,CpG_1438,CpG_1439,CpG_1815,CpG_1816,CpG_1817,CpG_1818,CpG_1819,CpG_1820,CpG_1821,CpG_1822,CpG_1823,CpG_1824,CpG_1825,CpG_1826,CpG_1827,CpG_1828,CpG_1829,CpG_1830,CpG_1831	Nol3,Sirt4	Nol3,Sirt4
GO Biological Process	GO:1902882	regulation of response to oxidative stress	92	1.840285e-4	1.000000e+0	2.571998e-2	4.017363e+0	2.240276e+0	9	26	5.142857e-2	3.461538e-1	2	3	78	CpG_1815,CpG_1816,CpG_1818,CpG_1820,CpG_1822,CpG_1824,CpG_1826,CpG_1828,CpG_766	CpG_1239,CpG_1240,CpG_1241,CpG_1242,CpG_1243,CpG_1815,CpG_1816,CpG_1817,CpG_1818,CpG_1819,CpG_1820,CpG_1821,CpG_1822,CpG_1823,CpG_1824,CpG_1825,CpG_1826,CpG_1827,CpG_1828,CpG_1829,CpG_1830,CpG_1831,CpG_763,CpG_764,CpG_765,CpG_766	Nol3,Sod1	Nol3,Nr4a3,Sod1
GO Biological Process	GO:1900407	regulation of cellular response to oxidative stress	92	1.840285e-4	1.000000e+0	2.571998e-2	4.017363e+0	2.240276e+0	9	26	5.142857e-2	3.461538e-1	2	3	70	CpG_1815,CpG_1816,CpG_1818,CpG_1820,CpG_1822,CpG_1824,CpG_1826,CpG_1828,CpG_766	CpG_1239,CpG_1240,CpG_1241,CpG_1242,CpG_1243,CpG_1815,CpG_1816,CpG_1817,CpG_1818,CpG_1819,CpG_1820,CpG_1821,CpG_1822,CpG_1823,CpG_1824,CpG_1825,CpG_1826,CpG_1827,CpG_1828,CpG_1829,CpG_1830,CpG_1831,CpG_763,CpG_764,CpG_765,CpG_766	Nol3,Sod1	Nol3,Nr4a3,Sod1
GO Biological Process	GO:0097553	calcium ion transmembrane import into cytosol	96	1.986157e-4	1.000000e+0	2.660209e-2	4.421224e+0	1.809453e+0	8	21	4.571429e-2	3.809524e-1	1	2	55	CpG_1815,CpG_1816,CpG_1818,CpG_1820,CpG_1822,CpG_1824,CpG_1826,CpG_1828	CpG_1815,CpG_1816,CpG_1817,CpG_1818,CpG_1819,CpG_1820,CpG_1821,CpG_1822,CpG_1823,CpG_1824,CpG_1825,CpG_1826,CpG_1827,CpG_1828,CpG_1829,CpG_1830,CpG_1831,CpG_31,CpG_32,CpG_33,CpG_34	Nol3	Nol3,Ptprc
GO Biological Process	GO:0060402	calcium ion transport into cytosol	96	1.986157e-4	1.000000e+0	2.660209e-2	4.421224e+0	1.809453e+0	8	21	4.571429e-2	3.809524e-1	1	2	61	CpG_1815,CpG_1816,CpG_1818,CpG_1820,CpG_1822,CpG_1824,CpG_1826,CpG_1828	CpG_1815,CpG_1816,CpG_1817,CpG_1818,CpG_1819,CpG_1820,CpG_1821,CpG_1822,CpG_1823,CpG_1824,CpG_1825,CpG_1826,CpG_1827,CpG_1828,CpG_1829,CpG_1830,CpG_1831,CpG_31,CpG_32,CpG_33,CpG_34	Nol3	Nol3,Ptprc
GO Biological Process	GO:0051282	regulation of sequestering of calcium ion	96	1.986157e-4	1.000000e+0	2.660209e-2	4.421224e+0	1.809453e+0	8	21	4.571429e-2	3.809524e-1	1	2	106	CpG_1815,CpG_1816,CpG_1818,CpG_1820,CpG_1822,CpG_1824,CpG_1826,CpG_1828	CpG_1815,CpG_1816,CpG_1817,CpG_1818,CpG_1819,CpG_1820,CpG_1821,CpG_1822,CpG_1823,CpG_1824,CpG_1825,CpG_1826,CpG_1827,CpG_1828,CpG_1829,CpG_1830,CpG_1831,CpG_31,CpG_32,CpG_33,CpG_34	Nol3	Nol3,Ptprc
GO Biological Process	GO:0051209	release of sequestered calcium ion into cytosol	96	1.986157e-4	1.000000e+0	2.660209e-2	4.421224e+0	1.809453e+0	8	21	4.571429e-2	3.809524e-1	1	2	45	CpG_1815,CpG_1816,CpG_1818,CpG_1820,CpG_1822,CpG_1824,CpG_1826,CpG_1828	CpG_1815,CpG_1816,CpG_1817,CpG_1818,CpG_1819,CpG_1820,CpG_1821,CpG_1822,CpG_1823,CpG_1824,CpG_1825,CpG_1826,CpG_1827,CpG_1828,CpG_1829,CpG_1830,CpG_1831,CpG_31,CpG_32,CpG_33,CpG_34	Nol3	Nol3,Ptprc
GO Biological Process	GO:0032845	negative regulation of homeostatic process	96	1.986157e-4	1.000000e+0	2.660209e-2	4.421224e+0	1.809453e+0	8	21	4.571429e-2	3.809524e-1	1	2	161	CpG_1815,CpG_1816,CpG_1818,CpG_1820,CpG_1822,CpG_1824,CpG_1826,CpG_1828	CpG_1815,CpG_1816,CpG_1817,CpG_1818,CpG_1819,CpG_1820,CpG_1821,CpG_1822,CpG_1823,CpG_1824,CpG_1825,CpG_1826,CpG_1827,CpG_1828,CpG_1829,CpG_1830,CpG_1831,CpG_31,CpG_32,CpG_33,CpG_34	Nol3	Nol3,Ptprc
GO Biological Process	GO:0031644	regulation of neurological system process	101	2.030775e-4	1.000000e+0	2.585317e-2	7.253571e+0	6.893156e-1	5	8	2.857143e-2	6.250000e-1	1	1	72	CpG_1471,CpG_1473,CpG_1475,CpG_1477,CpG_1478	CpG_1471,CpG_1472,CpG_1473,CpG_1474,CpG_1475,CpG_1476,CpG_1477,CpG_1478	Wasf3	Wasf3
GO Biological Process	GO:0031646	positive regulation of neurological system process	101	2.030775e-4	1.000000e+0	2.585317e-2	7.253571e+0	6.893156e-1	5	8	2.857143e-2	6.250000e-1	1	1	25	CpG_1471,CpG_1473,CpG_1475,CpG_1477,CpG_1478	CpG_1471,CpG_1472,CpG_1473,CpG_1474,CpG_1475,CpG_1476,CpG_1477,CpG_1478	Wasf3	Wasf3
GO Biological Process	GO:0031643	positive regulation of myelination	101	2.030775e-4	1.000000e+0	2.585317e-2	7.253571e+0	6.893156e-1	5	8	2.857143e-2	6.250000e-1	1	1	13	CpG_1471,CpG_1473,CpG_1475,CpG_1477,CpG_1478	CpG_1471,CpG_1472,CpG_1473,CpG_1474,CpG_1475,CpG_1476,CpG_1477,CpG_1478	Wasf3	Wasf3
GO Biological Process	GO:0097581	lamellipodium organization	101	2.030775e-4	1.000000e+0	2.585317e-2	7.253571e+0	6.893156e-1	5	8	2.857143e-2	6.250000e-1	1	1	42	CpG_1471,CpG_1473,CpG_1475,CpG_1477,CpG_1478	CpG_1471,CpG_1472,CpG_1473,CpG_1474,CpG_1475,CpG_1476,CpG_1477,CpG_1478	Wasf3	Wasf3
GO Biological Process	GO:0031641	regulation of myelination	101	2.030775e-4	1.000000e+0	2.585317e-2	7.253571e+0	6.893156e-1	5	8	2.857143e-2	6.250000e-1	1	1	36	CpG_1471,CpG_1473,CpG_1475,CpG_1477,CpG_1478	CpG_1471,CpG_1472,CpG_1473,CpG_1474,CpG_1475,CpG_1476,CpG_1477,CpG_1478	Wasf3	Wasf3
GO Biological Process	GO:0014003	oligodendrocyte development	101	2.030775e-4	1.000000e+0	2.585317e-2	7.253571e+0	6.893156e-1	5	8	2.857143e-2	6.250000e-1	1	1	41	CpG_1471,CpG_1473,CpG_1475,CpG_1477,CpG_1478	CpG_1471,CpG_1472,CpG_1473,CpG_1474,CpG_1475,CpG_1476,CpG_1477,CpG_1478	Wasf3	Wasf3
GO Biological Process	GO:0030032	lamellipodium assembly	101	2.030775e-4	1.000000e+0	2.585317e-2	7.253571e+0	6.893156e-1	5	8	2.857143e-2	6.250000e-1	1	1	33	CpG_1471,CpG_1473,CpG_1475,CpG_1477,CpG_1478	CpG_1471,CpG_1472,CpG_1473,CpG_1474,CpG_1475,CpG_1476,CpG_1477,CpG_1478	Wasf3	Wasf3
GO Biological Process	GO:0071826	ribonucleoprotein complex subunit organization	108	2.109734e-4	1.000000e+0	2.511756e-2	3.626786e+0	2.757262e+0	10	32	5.714286e-2	3.125000e-1	2	4	209	CpG_1636,CpG_1637,CpG_1815,CpG_1816,CpG_1818,CpG_1820,CpG_1822,CpG_1824,CpG_1826,CpG_1828	CpG_1635,CpG_1636,CpG_1637,CpG_1815,CpG_1816,CpG_1817,CpG_1818,CpG_1819,CpG_1820,CpG_1821,CpG_1822,CpG_1823,CpG_1824,CpG_1825,CpG_1826,CpG_1827,CpG_1828,CpG_1829,CpG_1830,CpG_1831,CpG_338,CpG_339,CpG_340,CpG_341,CpG_342,CpG_343,CpG_344,CpG_897,CpG_898,CpG_899,CpG_900,CpG_901	Lsm14a,Nol3	Lsm14a,Nol3,Rpl38,Rps14
GO Biological Process	GO:0022618	ribonucleoprotein complex assembly	108	2.109734e-4	1.000000e+0	2.511756e-2	3.626786e+0	2.757262e+0	10	32	5.714286e-2	3.125000e-1	2	4	197	CpG_1636,CpG_1637,CpG_1815,CpG_1816,CpG_1818,CpG_1820,CpG_1822,CpG_1824,CpG_1826,CpG_1828	CpG_1635,CpG_1636,CpG_1637,CpG_1815,CpG_1816,CpG_1817,CpG_1818,CpG_1819,CpG_1820,CpG_1821,CpG_1822,CpG_1823,CpG_1824,CpG_1825,CpG_1826,CpG_1827,CpG_1828,CpG_1829,CpG_1830,CpG_1831,CpG_338,CpG_339,CpG_340,CpG_341,CpG_342,CpG_343,CpG_344,CpG_897,CpG_898,CpG_899,CpG_900,CpG_901	Lsm14a,Nol3	Lsm14a,Nol3,Rpl38,Rps14
GO Biological Process	GO:1903317	regulation of protein maturation	110	2.171278e-4	1.000000e+0	2.538027e-2	3.359549e+0	3.274249e+0	11	38	6.285714e-2	2.894737e-1	3	5	78	CpG_1433,CpG_1815,CpG_1816,CpG_1818,CpG_1820,CpG_1822,CpG_1824,CpG_1826,CpG_1828,CpG_21,CpG_22	CpG_1431,CpG_1432,CpG_1433,CpG_1434,CpG_1435,CpG_1436,CpG_1437,CpG_1438,CpG_1439,CpG_1815,CpG_1816,CpG_1817,CpG_1818,CpG_1819,CpG_1820,CpG_1821,CpG_1822,CpG_1823,CpG_1824,CpG_1825,CpG_1826,CpG_1827,CpG_1828,CpG_1829,CpG_1830,CpG_1831,CpG_19,CpG_20,CpG_21,CpG_22,CpG_781,CpG_782,CpG_783,CpG_902,CpG_903,CpG_904,CpG_905,CpG_906	Nol3,Sirt4,Tnp1	Ccbe1,Nol3,Rps6ka2,Sirt4,Tnp1
GO Biological Process	GO:0070613	regulation of protein processing	110	2.171278e-4	1.000000e+0	2.538027e-2	3.359549e+0	3.274249e+0	11	38	6.285714e-2	2.894737e-1	3	5	77	CpG_1433,CpG_1815,CpG_1816,CpG_1818,CpG_1820,CpG_1822,CpG_1824,CpG_1826,CpG_1828,CpG_21,CpG_22	CpG_1431,CpG_1432,CpG_1433,CpG_1434,CpG_1435,CpG_1436,CpG_1437,CpG_1438,CpG_1439,CpG_1815,CpG_1816,CpG_1817,CpG_1818,CpG_1819,CpG_1820,CpG_1821,CpG_1822,CpG_1823,CpG_1824,CpG_1825,CpG_1826,CpG_1827,CpG_1828,CpG_1829,CpG_1830,CpG_1831,CpG_19,CpG_20,CpG_21,CpG_22,CpG_781,CpG_782,CpG_783,CpG_902,CpG_903,CpG_904,CpG_905,CpG_906	Nol3,Sirt4,Tnp1	Ccbe1,Nol3,Rps6ka2,Sirt4,Tnp1
GO Biological Process	GO:0051129	negative regulation of cellular component organization	112	2.215582e-4	1.000000e+0	2.543567e-2	2.152673e+0	1.068439e+1	23	124	1.314286e-1	1.854839e-1	10	21	639	CpG_1433,CpG_161,CpG_162,CpG_164,CpG_1660,CpG_1815,CpG_1816,CpG_1818,CpG_1820,CpG_1822,CpG_1824,CpG_1826,CpG_1828,CpG_1927,CpG_207,CpG_257,CpG_258,CpG_259,CpG_27,CpG_40,CpG_41,CpG_42,CpG_640	CpG_115,CpG_116,CpG_117,CpG_118,CpG_119,CpG_120,CpG_121,CpG_122,CpG_123,CpG_124,CpG_125,CpG_126,CpG_127,CpG_128,CpG_129,CpG_130,CpG_131,CpG_132,CpG_133,CpG_134,CpG_135,CpG_1401,CpG_1402,CpG_1403,CpG_1404,CpG_1405,CpG_1406,CpG_1431,CpG_1432,CpG_1433,CpG_1434,CpG_1435,CpG_1436,CpG_1437,CpG_1438,CpG_1439,CpG_1595,CpG_1596,CpG_1597,CpG_1598,CpG_1599,CpG_161,CpG_162,CpG_163,CpG_164,CpG_165,CpG_1659,Cp…	Bcas3,Bcl11a,Dnajb2,Fbln1,Kank2,Lyplal1,Nol3,Sirt4,Ube3a,Wnt3a	Adcy6,Apoe,Bcas3,Bcl11a,D130043K22Rik,Dnajb2,Fbln1,Kank2,Kcne1,Lrrc15,Lyplal1,Mdm1,Nol3,Npm1,Rgma,Rps6ka2,Sirt4,Slc35f6,Tbc1d30,Ube3a,Wnt3a
GO Biological Process	GO:0044802	single-organism membrane organization	113	2.448114e-4	1.000000e+0	2.785650e-2	2.057751e+0	1.214919e+1	25	141	1.428571e-1	1.773050e-1	11	23	657	CpG_1014,CpG_1023,CpG_1322,CpG_1660,CpG_1693,CpG_1815,CpG_1816,CpG_1818,CpG_1820,CpG_1822,CpG_1824,CpG_1826,CpG_1828,CpG_207,CpG_235,CpG_723,CpG_730,CpG_766,CpG_80,CpG_82,CpG_838,CpG_840,CpG_842,CpG_845,CpG_847	CpG_1014,CpG_1015,CpG_1016,CpG_1017,CpG_1018,CpG_1019,CpG_1020,CpG_1021,CpG_1022,CpG_1023,CpG_1056,CpG_1057,CpG_1058,CpG_1077,CpG_1078,CpG_1225,CpG_1226,CpG_1227,CpG_1228,CpG_1229,CpG_1239,CpG_1240,CpG_1241,CpG_1242,CpG_1243,CpG_1322,CpG_1323,CpG_1401,CpG_1402,CpG_1403,CpG_1404,CpG_1405,CpG_1406,CpG_1469,CpG_1470,CpG_1595,CpG_1596,CpG_1597,CpG_1598,CpG_1599,CpG_1659,CpG_1660,CpG_1661,CpG_1662,CpG…	Abca7,Arf1,Atp10a,Atpif1,Cstad,Doc2b,Etv5,Mymx,Nol3,Sod1,Uvrag	Abca7,Apoe,Arf1,Atp10a,Atp8b5,Atpif1,Bcl2l11,Cstad,Doc2b,Etv5,Kcnip2,Lin7c,Mpp5,Mymx,Nol3,Reep3,Rftn1,Rhot1,Sec61b,Slc35f6,Sod1,Stx1a,Uvrag
GO Biological Process	GO:0048711	positive regulation of astrocyte differentiation	114	2.490175e-4	1.000000e+0	2.808655e-2	9.284571e+0	4.308223e-1	4	5	2.285714e-2	8.000000e-1	1	1	11	CpG_890,CpG_891,CpG_892,CpG_894	CpG_890,CpG_891,CpG_892,CpG_893,CpG_894	Bin1	Bin1
GO Biological Process	GO:0060988	lipid tube assembly	114	2.490175e-4	1.000000e+0	2.808655e-2	9.284571e+0	4.308223e-1	4	5	2.285714e-2	8.000000e-1	1	1	3	CpG_890,CpG_891,CpG_892,CpG_894	CpG_890,CpG_891,CpG_892,CpG_893,CpG_894	Bin1	Bin1
GO Biological Process	GO:0051647	nucleus localization	114	2.490175e-4	1.000000e+0	2.808655e-2	9.284571e+0	4.308223e-1	4	5	2.285714e-2	8.000000e-1	1	1	28	CpG_890,CpG_891,CpG_892,CpG_894	CpG_890,CpG_891,CpG_892,CpG_893,CpG_894	Bin1	Bin1
GO Biological Process	GO:0009437	carnitine metabolic process	114	2.490175e-4	1.000000e+0	2.808655e-2	9.284571e+0	4.308223e-1	4	5	2.285714e-2	8.000000e-1	1	1	12	CpG_1640,CpG_1641,CpG_1642,CpG_1644	CpG_1640,CpG_1641,CpG_1642,CpG_1643,CpG_1644	Cpt1c	Cpt1c
GO Biological Process	GO:0048710	regulation of astrocyte differentiation	114	2.490175e-4	1.000000e+0	2.808655e-2	9.284571e+0	4.308223e-1	4	5	2.285714e-2	8.000000e-1	1	1	26	CpG_890,CpG_891,CpG_892,CpG_894	CpG_890,CpG_891,CpG_892,CpG_893,CpG_894	Bin1	Bin1
GO Biological Process	GO:0006577	amino-acid betaine metabolic process	114	2.490175e-4	1.000000e+0	2.808655e-2	9.284571e+0	4.308223e-1	4	5	2.285714e-2	8.000000e-1	1	1	17	CpG_1640,CpG_1641,CpG_1642,CpG_1644	CpG_1640,CpG_1641,CpG_1642,CpG_1643,CpG_1644	Cpt1c	Cpt1c
GO Biological Process	GO:0006635	fatty acid beta-oxidation	114	2.490175e-4	1.000000e+0	2.808655e-2	9.284571e+0	4.308223e-1	4	5	2.285714e-2	8.000000e-1	1	1	54	CpG_1640,CpG_1641,CpG_1642,CpG_1644	CpG_1640,CpG_1641,CpG_1642,CpG_1643,CpG_1644	Cpt1c	Cpt1c
GO Biological Process	GO:1903202	negative regulation of oxidative stress-induced cell death	121	2.893991e-4	1.000000e+0	3.075284e-2	4.220260e+0	1.895618e+0	8	22	4.571429e-2	3.636364e-1	1	2	41	CpG_1815,CpG_1816,CpG_1818,CpG_1820,CpG_1822,CpG_1824,CpG_1826,CpG_1828	CpG_1239,CpG_1240,CpG_1241,CpG_1242,CpG_1243,CpG_1815,CpG_1816,CpG_1817,CpG_1818,CpG_1819,CpG_1820,CpG_1821,CpG_1822,CpG_1823,CpG_1824,CpG_1825,CpG_1826,CpG_1827,CpG_1828,CpG_1829,CpG_1830,CpG_1831	Nol3	Nol3,Nr4a3
GO Biological Process	GO:1900408	negative regulation of cellular response to oxidative stress	121	2.893991e-4	1.000000e+0	3.075284e-2	4.220260e+0	1.895618e+0	8	22	4.571429e-2	3.636364e-1	1	2	42	CpG_1815,CpG_1816,CpG_1818,CpG_1820,CpG_1822,CpG_1824,CpG_1826,CpG_1828	CpG_1239,CpG_1240,CpG_1241,CpG_1242,CpG_1243,CpG_1815,CpG_1816,CpG_1817,CpG_1818,CpG_1819,CpG_1820,CpG_1821,CpG_1822,CpG_1823,CpG_1824,CpG_1825,CpG_1826,CpG_1827,CpG_1828,CpG_1829,CpG_1830,CpG_1831	Nol3	Nol3,Nr4a3
GO Biological Process	GO:1902883	negative regulation of response to oxidative stress	121	2.893991e-4	1.000000e+0	3.075284e-2	4.220260e+0	1.895618e+0	8	22	4.571429e-2	3.636364e-1	1	2	44	CpG_1815,CpG_1816,CpG_1818,CpG_1820,CpG_1822,CpG_1824,CpG_1826,CpG_1828	CpG_1239,CpG_1240,CpG_1241,CpG_1242,CpG_1243,CpG_1815,CpG_1816,CpG_1817,CpG_1818,CpG_1819,CpG_1820,CpG_1821,CpG_1822,CpG_1823,CpG_1824,CpG_1825,CpG_1826,CpG_1827,CpG_1828,CpG_1829,CpG_1830,CpG_1831	Nol3	Nol3,Nr4a3
GO Biological Process	GO:0010804	negative regulation of tumor necrosis factor-mediated signaling pathway	121	2.893991e-4	1.000000e+0	3.075284e-2	4.220260e+0	1.895618e+0	8	22	4.571429e-2	3.636364e-1	1	2	13	CpG_1815,CpG_1816,CpG_1818,CpG_1820,CpG_1822,CpG_1824,CpG_1826,CpG_1828	CpG_1180,CpG_1181,CpG_1182,CpG_1183,CpG_1184,CpG_1815,CpG_1816,CpG_1817,CpG_1818,CpG_1819,CpG_1820,CpG_1821,CpG_1822,CpG_1823,CpG_1824,CpG_1825,CpG_1826,CpG_1827,CpG_1828,CpG_1829,CpG_1830,CpG_1831	Nol3	Hist2h2be,Nol3
GO Biological Process	GO:0042345	regulation of NF-kappaB import into nucleus	121	2.893991e-4	1.000000e+0	3.075284e-2	4.220260e+0	1.895618e+0	8	22	4.571429e-2	3.636364e-1	1	2	40	CpG_1815,CpG_1816,CpG_1818,CpG_1820,CpG_1822,CpG_1824,CpG_1826,CpG_1828	CpG_1773,CpG_1774,CpG_1775,CpG_1776,CpG_1777,CpG_1815,CpG_1816,CpG_1817,CpG_1818,CpG_1819,CpG_1820,CpG_1821,CpG_1822,CpG_1823,CpG_1824,CpG_1825,CpG_1826,CpG_1827,CpG_1828,CpG_1829,CpG_1830,CpG_1831	Nol3	Cyld,Nol3
GO Biological Process	GO:0050854	regulation of antigen receptor-mediated signaling pathway	121	2.893991e-4	1.000000e+0	3.075284e-2	4.220260e+0	1.895618e+0	8	22	4.571429e-2	3.636364e-1	1	4	52	CpG_990,CpG_991,CpG_994,CpG_995,CpG_996,CpG_997,CpG_998,CpG_999	CpG_1773,CpG_1774,CpG_1775,CpG_1776,CpG_1777,CpG_305,CpG_306,CpG_307,CpG_31,CpG_32,CpG_33,CpG_34,CpG_990,CpG_991,CpG_992,CpG_993,CpG_994,CpG_995,CpG_996,CpG_997,CpG_998,CpG_999	Phpt1	Ccr7,Cyld,Phpt1,Ptprc
GO Biological Process	GO:2001233	regulation of apoptotic signaling pathway	127	3.078463e-4	1.000000e+0	3.116762e-2	2.543718e+0	6.290005e+0	16	73	9.142857e-2	2.191781e-1	5	11	397	CpG_1322,CpG_1815,CpG_1816,CpG_1818,CpG_1820,CpG_1822,CpG_1824,CpG_1826,CpG_1828,CpG_40,CpG_41,CpG_42,CpG_501,CpG_502,CpG_504,CpG_766	CpG_1077,CpG_1078,CpG_1083,CpG_1084,CpG_1085,CpG_1086,CpG_1087,CpG_1088,CpG_1089,CpG_1090,CpG_1091,CpG_1092,CpG_1093,CpG_1094,CpG_1095,CpG_1096,CpG_1097,CpG_1098,CpG_1322,CpG_1323,CpG_1401,CpG_1402,CpG_1403,CpG_1404,CpG_1405,CpG_1406,CpG_1773,CpG_1774,CpG_1775,CpG_1776,CpG_1777,CpG_1815,CpG_1816,CpG_1817,CpG_1818,CpG_1819,CpG_1820,CpG_1821,CpG_1822,CpG_1823,CpG_1824,CpG_1825,CpG_1826,CpG_1827,CpG…	Atpif1,Dapk1,Nol3,Sod1,Tgfb2	Atpif1,Bcl2l11,Bik,Cyld,Dapk1,Nol3,Ptprc,Slc35f6,Sod1,Stk4,Tgfb2
GO Biological Process	GO:0048863	stem cell differentiation	128	3.302375e-4	1.000000e+0	3.317339e-2	3.027578e+0	3.963565e+0	12	46	6.857143e-2	2.608696e-1	4	6	149	CpG_257,CpG_258,CpG_259,CpG_282,CpG_283,CpG_287,CpG_289,CpG_40,CpG_41,CpG_42,CpG_643,CpG_662	CpG_1670,CpG_1671,CpG_257,CpG_258,CpG_259,CpG_280,CpG_281,CpG_282,CpG_283,CpG_284,CpG_285,CpG_286,CpG_287,CpG_288,CpG_289,CpG_290,CpG_291,CpG_292,CpG_31,CpG_32,CpG_33,CpG_34,CpG_40,CpG_41,CpG_42,CpG_643,CpG_644,CpG_645,CpG_646,CpG_647,CpG_648,CpG_649,CpG_650,CpG_651,CpG_652,CpG_653,CpG_654,CpG_655,CpG_656,CpG_657,CpG_658,CpG_659,CpG_660,CpG_661,CpG_662,CpG_663	Epop,Tbx2,Tgfb2,Wnt7b	Chd2,Epop,Ptprc,Tbx2,Tgfb2,Wnt7b
GO Biological Process	GO:2001242	regulation of intrinsic apoptotic signaling pathway	129	3.493542e-4	1.000000e+0	3.482168e-2	3.730408e+0	2.412605e+0	9	28	5.142857e-2	3.214286e-1	2	4	154	CpG_1815,CpG_1816,CpG_1818,CpG_1820,CpG_1822,CpG_1824,CpG_1826,CpG_1828,CpG_766	CpG_1077,CpG_1078,CpG_1773,CpG_1774,CpG_1775,CpG_1776,CpG_1777,CpG_1815,CpG_1816,CpG_1817,CpG_1818,CpG_1819,CpG_1820,CpG_1821,CpG_1822,CpG_1823,CpG_1824,CpG_1825,CpG_1826,CpG_1827,CpG_1828,CpG_1829,CpG_1830,CpG_1831,CpG_763,CpG_764,CpG_765,CpG_766	Nol3,Sod1	Bcl2l11,Cyld,Nol3,Sod1
GO Biological Process	GO:0006949	syncytium formation	130	3.866291e-4	1.000000e+0	3.824059e-2	5.356484e+0	1.120138e+0	6	13	3.428571e-2	4.615385e-1	2	2	31	CpG_838,CpG_840,CpG_842,CpG_845,CpG_847,CpG_970	CpG_837,CpG_838,CpG_839,CpG_840,CpG_841,CpG_842,CpG_843,CpG_844,CpG_845,CpG_846,CpG_847,CpG_970,CpG_971	Mymx,Sh3pxd2a	Mymx,Sh3pxd2a
GO Biological Process	GO:0003203	endocardial cushion morphogenesis	130	3.866291e-4	1.000000e+0	3.824059e-2	5.356484e+0	1.120138e+0	6	13	3.428571e-2	4.615385e-1	2	3	29	CpG_257,CpG_258,CpG_259,CpG_40,CpG_41,CpG_42	CpG_257,CpG_258,CpG_259,CpG_40,CpG_41,CpG_42,CpG_959,CpG_960,CpG_961,CpG_962,CpG_963,CpG_964,CpG_965	Tbx2,Tgfb2	Fgf8,Tbx2,Tgfb2
GO Biological Process	GO:0003197	endocardial cushion development	130	3.866291e-4	1.000000e+0	3.824059e-2	5.356484e+0	1.120138e+0	6	13	3.428571e-2	4.615385e-1	2	3	41	CpG_257,CpG_258,CpG_259,CpG_40,CpG_41,CpG_42	CpG_257,CpG_258,CpG_259,CpG_40,CpG_41,CpG_42,CpG_959,CpG_960,CpG_961,CpG_962,CpG_963,CpG_964,CpG_965	Tbx2,Tgfb2	Fgf8,Tbx2,Tgfb2
GO Biological Process	GO:0000768	syncytium formation by plasma membrane fusion	130	3.866291e-4	1.000000e+0	3.824059e-2	5.356484e+0	1.120138e+0	6	13	3.428571e-2	4.615385e-1	2	2	30	CpG_838,CpG_840,CpG_842,CpG_845,CpG_847,CpG_970	CpG_837,CpG_838,CpG_839,CpG_840,CpG_841,CpG_842,CpG_843,CpG_844,CpG_845,CpG_846,CpG_847,CpG_970,CpG_971	Mymx,Sh3pxd2a	Mymx,Sh3pxd2a
GO Biological Process	GO:0055082	cellular chemical homeostasis	134	4.033753e-4	1.000000e+0	3.870597e-2	2.406063e+0	7.065485e+0	17	82	9.714286e-2	2.073171e-1	9	14	610	CpG_1539,CpG_1540,CpG_1815,CpG_1816,CpG_1818,CpG_1820,CpG_1822,CpG_1824,CpG_1826,CpG_1828,CpG_1866,CpG_207,CpG_27,CpG_315,CpG_358,CpG_566,CpG_766	CpG_1222,CpG_1223,CpG_1224,CpG_1518,CpG_1519,CpG_1520,CpG_1521,CpG_1539,CpG_1540,CpG_1541,CpG_1542,CpG_1543,CpG_1595,CpG_1596,CpG_1597,CpG_1598,CpG_1599,CpG_1815,CpG_1816,CpG_1817,CpG_1818,CpG_1819,CpG_1820,CpG_1821,CpG_1822,CpG_1823,CpG_1824,CpG_1825,CpG_1826,CpG_1827,CpG_1828,CpG_1829,CpG_1830,CpG_1831,CpG_1856,CpG_1857,CpG_1858,CpG_1859,CpG_1860,CpG_1861,CpG_1862,CpG_1863,CpG_1864,CpG_1865,CpG…	Arf1,C1qtnf1,Calb2,Gata2,Nol3,Ptprn,Scara5,Sod1,Wnk4	Aco1,Apoe,Arf1,C1qtnf1,Calb2,Gata2,Mcur1,Nol3,Ptprc,Ptprn,Scara5,Sod1,Tacr1,Wnk4
GO Biological Process	GO:0097164	ammonium ion metabolic process	135	4.114800e-4	1.000000e+0	3.919118e-2	4.036770e+0	1.981782e+0	8	23	4.571429e-2	3.478261e-1	3	4	133	CpG_1433,CpG_1640,CpG_1641,CpG_1642,CpG_1644,CpG_40,CpG_41,CpG_42	CpG_1431,CpG_1432,CpG_1433,CpG_1434,CpG_1435,CpG_1436,CpG_1437,CpG_1438,CpG_1439,CpG_1640,CpG_1641,CpG_1642,CpG_1643,CpG_1644,CpG_1700,CpG_1701,CpG_1702,CpG_1703,CpG_1704,CpG_1705,CpG_40,CpG_41,CpG_42	Cpt1c,Pla2g1b,Tgfb2	Cpt1c,Pla2g1b,Smpd1,Tgfb2
GO Biological Process	GO:0000398	mRNA splicing, via spliceosome	135	4.114800e-4	1.000000e+0	3.919118e-2	4.036770e+0	1.981782e+0	8	23	4.571429e-2	3.478261e-1	1	2	177	CpG_1815,CpG_1816,CpG_1818,CpG_1820,CpG_1822,CpG_1824,CpG_1826,CpG_1828	CpG_1720,CpG_1721,CpG_1722,CpG_1723,CpG_1724,CpG_1725,CpG_1815,CpG_1816,CpG_1817,CpG_1818,CpG_1819,CpG_1820,CpG_1821,CpG_1822,CpG_1823,CpG_1824,CpG_1825,CpG_1826,CpG_1827,CpG_1828,CpG_1829,CpG_1830,CpG_1831	Nol3	Dhx32,Nol3
GO Biological Process	GO:0000375	RNA splicing, via transesterification reactions	135	4.114800e-4	1.000000e+0	3.919118e-2	4.036770e+0	1.981782e+0	8	23	4.571429e-2	3.478261e-1	1	2	178	CpG_1815,CpG_1816,CpG_1818,CpG_1820,CpG_1822,CpG_1824,CpG_1826,CpG_1828	CpG_1720,CpG_1721,CpG_1722,CpG_1723,CpG_1724,CpG_1725,CpG_1815,CpG_1816,CpG_1817,CpG_1818,CpG_1819,CpG_1820,CpG_1821,CpG_1822,CpG_1823,CpG_1824,CpG_1825,CpG_1826,CpG_1827,CpG_1828,CpG_1829,CpG_1830,CpG_1831	Nol3	Dhx32,Nol3
GO Biological Process	GO:0009062	fatty acid catabolic process	138	4.397328e-4	1.000000e+0	4.097163e-2	4.513333e+0	1.550960e+0	7	18	4.000000e-2	3.888889e-1	2	3	75	CpG_1307,CpG_1308,CpG_1309,CpG_1640,CpG_1641,CpG_1642,CpG_1644	CpG_1307,CpG_1308,CpG_1309,CpG_1640,CpG_1641,CpG_1642,CpG_1643,CpG_1644,CpG_529,CpG_530,CpG_531,CpG_532,CpG_533,CpG_534,CpG_535,CpG_536,CpG_537,CpG_538	Cpt1c,Faah	Cpt1c,Faah,Hacl1
GO Biological Process	GO:0051480	regulation of cytosolic calcium ion concentration	139	5.068109e-4	1.000000e+0	4.688183e-2	2.901429e+0	4.135894e+0	12	48	6.857143e-2	2.500000e-1	4	6	234	CpG_1539,CpG_1540,CpG_1815,CpG_1816,CpG_1818,CpG_1820,CpG_1822,CpG_1824,CpG_1826,CpG_1828,CpG_1866,CpG_358	CpG_1518,CpG_1519,CpG_1520,CpG_1521,CpG_1539,CpG_1540,CpG_1541,CpG_1542,CpG_1543,CpG_1815,CpG_1816,CpG_1817,CpG_1818,CpG_1819,CpG_1820,CpG_1821,CpG_1822,CpG_1823,CpG_1824,CpG_1825,CpG_1826,CpG_1827,CpG_1828,CpG_1829,CpG_1830,CpG_1831,CpG_1856,CpG_1857,CpG_1858,CpG_1859,CpG_1860,CpG_1861,CpG_1862,CpG_1863,CpG_1864,CpG_1865,CpG_1866,CpG_1867,CpG_1868,CpG_31,CpG_32,CpG_33,CpG_34,CpG_358,CpG_359,CpG_…	C1qtnf1,Calb2,Gata2,Nol3	C1qtnf1,Calb2,Gata2,Nol3,Ptprc,Tacr1
GO Biological Process	GO:0045927	positive regulation of growth	140	5.251900e-4	1.000000e+0	4.823495e-2	2.522981e+0	5.945347e+0	15	69	8.571429e-2	2.173913e-1	5	11	252	CpG_161,CpG_162,CpG_164,CpG_207,CpG_257,CpG_258,CpG_259,CpG_40,CpG_41,CpG_42,CpG_861,CpG_862,CpG_863,CpG_864,CpG_865	CpG_1056,CpG_1057,CpG_1058,CpG_1220,CpG_136,CpG_137,CpG_138,CpG_139,CpG_140,CpG_141,CpG_142,CpG_143,CpG_144,CpG_145,CpG_146,CpG_161,CpG_162,CpG_163,CpG_164,CpG_203,CpG_204,CpG_205,CpG_206,CpG_207,CpG_208,CpG_209,CpG_210,CpG_211,CpG_212,CpG_213,CpG_214,CpG_215,CpG_216,CpG_217,CpG_257,CpG_258,CpG_259,CpG_40,CpG_41,CpG_42,CpG_858,CpG_859,CpG_860,CpG_861,CpG_862,CpG_863,CpG_864,CpG_865,CpG_876,CpG_87…	Bcl11a,Hdgfl2,Tbx2,Tgfb2,Wnt3a	Bcl11a,Bdnf,Csf1,Fgf8,Gata6,Gli1,Hdgfl2,Tbx2,Tgfb2,Trpv2,Wnt3a
GO Biological Process	GO:0090087	regulation of peptide transport	141	6.121269e-4	1.000000e+0	5.582076e-2	3.223810e+0	3.101920e+0	10	36	5.714286e-2	2.777778e-1	3	5	196	CpG_1433,CpG_235,CpG_990,CpG_991,CpG_994,CpG_995,CpG_996,CpG_997,CpG_998,CpG_999	CpG_1415,CpG_1416,CpG_1417,CpG_1418,CpG_1419,CpG_1420,CpG_1431,CpG_1432,CpG_1433,CpG_1434,CpG_1435,CpG_1436,CpG_1437,CpG_1438,CpG_1439,CpG_1549,CpG_1550,CpG_1551,CpG_1552,CpG_1553,CpG_234,CpG_235,CpG_236,CpG_237,CpG_238,CpG_239,CpG_990,CpG_991,CpG_992,CpG_993,CpG_994,CpG_995,CpG_996,CpG_997,CpG_998,CpG_999	Doc2b,Phpt1,Sirt4	Doc2b,Nkx6-1,Phpt1,Pparg,Sirt4
GO Biological Process	GO:0090276	regulation of peptide hormone secretion	141	6.121269e-4	1.000000e+0	5.582076e-2	3.223810e+0	3.101920e+0	10	36	5.714286e-2	2.777778e-1	3	5	189	CpG_1433,CpG_235,CpG_990,CpG_991,CpG_994,CpG_995,CpG_996,CpG_997,CpG_998,CpG_999	CpG_1415,CpG_1416,CpG_1417,CpG_1418,CpG_1419,CpG_1420,CpG_1431,CpG_1432,CpG_1433,CpG_1434,CpG_1435,CpG_1436,CpG_1437,CpG_1438,CpG_1439,CpG_1549,CpG_1550,CpG_1551,CpG_1552,CpG_1553,CpG_234,CpG_235,CpG_236,CpG_237,CpG_238,CpG_239,CpG_990,CpG_991,CpG_992,CpG_993,CpG_994,CpG_995,CpG_996,CpG_997,CpG_998,CpG_999	Doc2b,Phpt1,Sirt4	Doc2b,Nkx6-1,Phpt1,Pparg,Sirt4
GO Biological Process	GO:0030099	myeloid cell differentiation	141	6.121269e-4	1.000000e+0	5.582076e-2	3.223810e+0	3.101920e+0	10	36	5.714286e-2	2.777778e-1	6	10	223	CpG_1322,CpG_1539,CpG_1540,CpG_476,CpG_84,CpG_970,CpG_983,CpG_985,CpG_986,CpG_987	CpG_1220,CpG_1322,CpG_1323,CpG_1539,CpG_1540,CpG_1541,CpG_1542,CpG_1543,CpG_1549,CpG_1550,CpG_1551,CpG_1552,CpG_1553,CpG_305,CpG_306,CpG_307,CpG_475,CpG_476,CpG_477,CpG_478,CpG_83,CpG_84,CpG_897,CpG_898,CpG_899,CpG_900,CpG_901,CpG_970,CpG_971,CpG_983,CpG_984,CpG_985,CpG_986,CpG_987,CpG_988,CpG_989	Atpif1,Efna2,Gata2,Pip4k2a,Rcor1,Sh3pxd2a	Atpif1,Ccr7,Csf1,Efna2,Gata2,Pip4k2a,Pparg,Rcor1,Rps14,Sh3pxd2a
GO Biological Process	GO:0002791	regulation of peptide secretion	141	6.121269e-4	1.000000e+0	5.582076e-2	3.223810e+0	3.101920e+0	10	36	5.714286e-2	2.777778e-1	3	5	194	CpG_1433,CpG_235,CpG_990,CpG_991,CpG_994,CpG_995,CpG_996,CpG_997,CpG_998,CpG_999	CpG_1415,CpG_1416,CpG_1417,CpG_1418,CpG_1419,CpG_1420,CpG_1431,CpG_1432,CpG_1433,CpG_1434,CpG_1435,CpG_1436,CpG_1437,CpG_1438,CpG_1439,CpG_1549,CpG_1550,CpG_1551,CpG_1552,CpG_1553,CpG_234,CpG_235,CpG_236,CpG_237,CpG_238,CpG_239,CpG_990,CpG_991,CpG_992,CpG_993,CpG_994,CpG_995,CpG_996,CpG_997,CpG_998,CpG_999	Doc2b,Phpt1,Sirt4	Doc2b,Nkx6-1,Phpt1,Pparg,Sirt4
GO Biological Process	GO:0006897	endocytosis	145	6.214126e-4	1.000000e+0	5.510430e-2	2.842216e+0	4.222058e+0	12	49	6.857143e-2	2.448980e-1	6	10	418	CpG_1539,CpG_1540,CpG_1660,CpG_566,CpG_80,CpG_82,CpG_890,CpG_891,CpG_892,CpG_894,CpG_949,CpG_953	CpG_1453,CpG_1454,CpG_1455,CpG_1539,CpG_1540,CpG_1541,CpG_1542,CpG_1543,CpG_1595,CpG_1596,CpG_1597,CpG_1598,CpG_1599,CpG_1625,CpG_1626,CpG_1627,CpG_1628,CpG_1629,CpG_1630,CpG_1631,CpG_1632,CpG_1633,CpG_1634,CpG_1659,CpG_1660,CpG_1661,CpG_1662,CpG_564,CpG_565,CpG_566,CpG_614,CpG_615,CpG_616,CpG_617,CpG_618,CpG_619,CpG_80,CpG_81,CpG_82,CpG_890,CpG_891,CpG_892,CpG_893,CpG_894,CpG_949,CpG_950,CpG_951…	Abca7,Bin1,Cd5,Gata2,Scara5,Ube3a	Abca7,Apoe,Bin1,Cd5,Gata2,Lsr,Scara5,Scarb1,Sh3bp1,Ube3a
GO Biological Process	GO:0070232	regulation of T cell apoptotic process	146	6.297170e-4	1.000000e+0	5.545823e-2	1.160571e+1	2.584934e-1	3	3	1.714286e-2	1.000000e+0	1	1	42	CpG_40,CpG_41,CpG_42	CpG_40,CpG_41,CpG_42	Tgfb2	Tgfb2
GO Biological Process	GO:0070234	positive regulation of T cell apoptotic process	146	6.297170e-4	1.000000e+0	5.545823e-2	1.160571e+1	2.584934e-1	3	3	1.714286e-2	1.000000e+0	1	1	15	CpG_40,CpG_41,CpG_42	CpG_40,CpG_41,CpG_42	Tgfb2	Tgfb2
GO Biological Process	GO:0070228	regulation of lymphocyte apoptotic process	146	6.297170e-4	1.000000e+0	5.545823e-2	1.160571e+1	2.584934e-1	3	3	1.714286e-2	1.000000e+0	1	1	66	CpG_40,CpG_41,CpG_42	CpG_40,CpG_41,CpG_42	Tgfb2	Tgfb2
GO Biological Process	GO:0061626	pharyngeal arch artery morphogenesis	146	6.297170e-4	1.000000e+0	5.545823e-2	1.160571e+1	2.584934e-1	3	3	1.714286e-2	1.000000e+0	1	1	8	CpG_40,CpG_41,CpG_42	CpG_40,CpG_41,CpG_42	Tgfb2	Tgfb2
GO Biological Process	GO:0070230	positive regulation of lymphocyte apoptotic process	146	6.297170e-4	1.000000e+0	5.545823e-2	1.160571e+1	2.584934e-1	3	3	1.714286e-2	1.000000e+0	1	1	22	CpG_40,CpG_41,CpG_42	CpG_40,CpG_41,CpG_42	Tgfb2	Tgfb2
GO Biological Process	GO:0090003	regulation of establishment of protein localization to plasma membrane	146	6.297170e-4	1.000000e+0	5.545823e-2	1.160571e+1	2.584934e-1	3	3	1.714286e-2	1.000000e+0	1	1	10	CpG_40,CpG_41,CpG_42	CpG_40,CpG_41,CpG_42	Lyplal1	Lyplal1
GO Biological Process	GO:0071696	ectodermal placode development	146	6.297170e-4	1.000000e+0	5.545823e-2	1.160571e+1	2.584934e-1	3	3	1.714286e-2	1.000000e+0	1	1	18	CpG_257,CpG_258,CpG_259	CpG_257,CpG_258,CpG_259	Tbx2	Tbx2
GO Biological Process	GO:0061343	cell adhesion involved in heart morphogenesis	146	6.297170e-4	1.000000e+0	5.545823e-2	1.160571e+1	2.584934e-1	3	3	1.714286e-2	1.000000e+0	1	1	4	CpG_40,CpG_41,CpG_42	CpG_40,CpG_41,CpG_42	Tgfb2	Tgfb2
GO Biological Process	GO:0071695	anatomical structure maturation	146	6.297170e-4	1.000000e+0	5.545823e-2	1.160571e+1	2.584934e-1	3	3	1.714286e-2	1.000000e+0	1	1	41	CpG_40,CpG_41,CpG_42	CpG_40,CpG_41,CpG_42	Tgfb2	Tgfb2
GO Biological Process	GO:0071391	cellular response to estrogen stimulus	146	6.297170e-4	1.000000e+0	5.545823e-2	1.160571e+1	2.584934e-1	3	3	1.714286e-2	1.000000e+0	1	1	15	CpG_257,CpG_258,CpG_259	CpG_257,CpG_258,CpG_259	Bcas3	Bcas3
GO Biological Process	GO:0070237	positive regulation of activation-induced cell death of T cells	146	6.297170e-4	1.000000e+0	5.545823e-2	1.160571e+1	2.584934e-1	3	3	1.714286e-2	1.000000e+0	1	1	2	CpG_40,CpG_41,CpG_42	CpG_40,CpG_41,CpG_42	Tgfb2	Tgfb2
GO Biological Process	GO:0070235	regulation of activation-induced cell death of T cells	146	6.297170e-4	1.000000e+0	5.545823e-2	1.160571e+1	2.584934e-1	3	3	1.714286e-2	1.000000e+0	1	1	9	CpG_40,CpG_41,CpG_42	CpG_40,CpG_41,CpG_42	Tgfb2	Tgfb2
GO Biological Process	GO:0060389	pathway-restricted SMAD protein phosphorylation	146	6.297170e-4	1.000000e+0	5.545823e-2	1.160571e+1	2.584934e-1	3	3	1.714286e-2	1.000000e+0	1	1	13	CpG_40,CpG_41,CpG_42	CpG_40,CpG_41,CpG_42	Tgfb2	Tgfb2
GO Biological Process	GO:0060324	face development	146	6.297170e-4	1.000000e+0	5.545823e-2	1.160571e+1	2.584934e-1	3	3	1.714286e-2	1.000000e+0	1	1	60	CpG_40,CpG_41,CpG_42	CpG_40,CpG_41,CpG_42	Tgfb2	Tgfb2
GO Biological Process	GO:0060325	face morphogenesis	146	6.297170e-4	1.000000e+0	5.545823e-2	1.160571e+1	2.584934e-1	3	3	1.714286e-2	1.000000e+0	1	1	40	CpG_40,CpG_41,CpG_42	CpG_40,CpG_41,CpG_42	Tgfb2	Tgfb2
GO Biological Process	GO:0060323	head morphogenesis	146	6.297170e-4	1.000000e+0	5.545823e-2	1.160571e+1	2.584934e-1	3	3	1.714286e-2	1.000000e+0	1	1	46	CpG_40,CpG_41,CpG_42	CpG_40,CpG_41,CpG_42	Tgfb2	Tgfb2
GO Biological Process	GO:0060038	cardiac muscle cell proliferation	146	6.297170e-4	1.000000e+0	5.545823e-2	1.160571e+1	2.584934e-1	3	3	1.714286e-2	1.000000e+0	1	1	17	CpG_40,CpG_41,CpG_42	CpG_40,CpG_41,CpG_42	Tgfb2	Tgfb2
GO Biological Process	GO:0090091	positive regulation of extracellular matrix disassembly	146	6.297170e-4	1.000000e+0	5.545823e-2	1.160571e+1	2.584934e-1	3	3	1.714286e-2	1.000000e+0	1	1	9	CpG_40,CpG_41,CpG_42	CpG_40,CpG_41,CpG_42	Tgfb2	Tgfb2
GO Biological Process	GO:0060379	cardiac muscle cell myoblast differentiation	146	6.297170e-4	1.000000e+0	5.545823e-2	1.160571e+1	2.584934e-1	3	3	1.714286e-2	1.000000e+0	1	1	10	CpG_257,CpG_258,CpG_259	CpG_257,CpG_258,CpG_259	Tbx2	Tbx2
GO Biological Process	GO:0060413	atrial septum morphogenesis	146	6.297170e-4	1.000000e+0	5.545823e-2	1.160571e+1	2.584934e-1	3	3	1.714286e-2	1.000000e+0	1	1	17	CpG_40,CpG_41,CpG_42	CpG_40,CpG_41,CpG_42	Tgfb2	Tgfb2
GO Biological Process	GO:0060788	ectodermal placode formation	146	6.297170e-4	1.000000e+0	5.545823e-2	1.160571e+1	2.584934e-1	3	3	1.714286e-2	1.000000e+0	1	1	17	CpG_257,CpG_258,CpG_259	CpG_257,CpG_258,CpG_259	Tbx2	Tbx2
GO Biological Process	GO:0060596	mammary placode formation	146	6.297170e-4	1.000000e+0	5.545823e-2	1.160571e+1	2.584934e-1	3	3	1.714286e-2	1.000000e+0	1	1	4	CpG_257,CpG_258,CpG_259	CpG_257,CpG_258,CpG_259	Tbx2	Tbx2
GO Biological Process	GO:0060592	mammary gland formation	146	6.297170e-4	1.000000e+0	5.545823e-2	1.160571e+1	2.584934e-1	3	3	1.714286e-2	1.000000e+0	1	1	9	CpG_257,CpG_258,CpG_259	CpG_257,CpG_258,CpG_259	Tbx2	Tbx2
GO Biological Process	GO:0060419	heart growth	146	6.297170e-4	1.000000e+0	5.545823e-2	1.160571e+1	2.584934e-1	3	3	1.714286e-2	1.000000e+0	1	1	28	CpG_40,CpG_41,CpG_42	CpG_40,CpG_41,CpG_42	Tgfb2	Tgfb2
GO Biological Process	GO:0061037	negative regulation of cartilage development	146	6.297170e-4	1.000000e+0	5.545823e-2	1.160571e+1	2.584934e-1	3	3	1.714286e-2	1.000000e+0	1	1	26	CpG_40,CpG_41,CpG_42	CpG_40,CpG_41,CpG_42	Tgfb2	Tgfb2
GO Biological Process	GO:2001241	positive regulation of extrinsic apoptotic signaling pathway in absence of ligand	146	6.297170e-4	1.000000e+0	5.545823e-2	1.160571e+1	2.584934e-1	3	3	1.714286e-2	1.000000e+0	1	1	15	CpG_40,CpG_41,CpG_42	CpG_40,CpG_41,CpG_42	Tgfb2	Tgfb2
GO Biological Process	GO:1905006	negative regulation of epithelial to mesenchymal transition involved in endocardial cushion formation	146	6.297170e-4	1.000000e+0	5.545823e-2	1.160571e+1	2.584934e-1	3	3	1.714286e-2	1.000000e+0	1	1	2	CpG_40,CpG_41,CpG_42	CpG_40,CpG_41,CpG_42	Tgfb2	Tgfb2
GO Biological Process	GO:1905007	positive regulation of epithelial to mesenchymal transition involved in endocardial cushion formation	146	6.297170e-4	1.000000e+0	5.545823e-2	1.160571e+1	2.584934e-1	3	3	1.714286e-2	1.000000e+0	1	1	5	CpG_40,CpG_41,CpG_42	CpG_40,CpG_41,CpG_42	Tgfb2	Tgfb2
GO Biological Process	GO:1905005	regulation of epithelial to mesenchymal transition involved in endocardial cushion formation	146	6.297170e-4	1.000000e+0	5.545823e-2	1.160571e+1	2.584934e-1	3	3	1.714286e-2	1.000000e+0	1	1	6	CpG_40,CpG_41,CpG_42	CpG_40,CpG_41,CpG_42	Tgfb2	Tgfb2
GO Biological Process	GO:1904748	regulation of apoptotic process involved in development	146	6.297170e-4	1.000000e+0	5.545823e-2	1.160571e+1	2.584934e-1	3	3	1.714286e-2	1.000000e+0	1	1	14	CpG_40,CpG_41,CpG_42	CpG_40,CpG_41,CpG_42	Tgfb2	Tgfb2
GO Biological Process	GO:1904426	positive regulation of GTP binding	146	6.297170e-4	1.000000e+0	5.545823e-2	1.160571e+1	2.584934e-1	3	3	1.714286e-2	1.000000e+0	1	1	2	CpG_40,CpG_41,CpG_42	CpG_40,CpG_41,CpG_42	Tgfb2	Tgfb2
GO Biological Process	GO:1905314	semi-lunar valve development	146	6.297170e-4	1.000000e+0	5.545823e-2	1.160571e+1	2.584934e-1	3	3	1.714286e-2	1.000000e+0	1	1	17	CpG_40,CpG_41,CpG_42	CpG_40,CpG_41,CpG_42	Tgfb2	Tgfb2
GO Biological Process	GO:1905331	negative regulation of morphogenesis of an epithelium	146	6.297170e-4	1.000000e+0	5.545823e-2	1.160571e+1	2.584934e-1	3	3	1.714286e-2	1.000000e+0	1	1	20	CpG_257,CpG_258,CpG_259	CpG_257,CpG_258,CpG_259	Tbx2	Tbx2
GO Biological Process	GO:0055017	cardiac muscle tissue growth	146	6.297170e-4	1.000000e+0	5.545823e-2	1.160571e+1	2.584934e-1	3	3	1.714286e-2	1.000000e+0	1	1	25	CpG_40,CpG_41,CpG_42	CpG_40,CpG_41,CpG_42	Tgfb2	Tgfb2
GO Biological Process	GO:2001239	regulation of extrinsic apoptotic signaling pathway in absence of ligand	146	6.297170e-4	1.000000e+0	5.545823e-2	1.160571e+1	2.584934e-1	3	3	1.714286e-2	1.000000e+0	1	1	48	CpG_40,CpG_41,CpG_42	CpG_40,CpG_41,CpG_42	Tgfb2	Tgfb2
GO Biological Process	GO:2000251	positive regulation of actin cytoskeleton reorganization	146	6.297170e-4	1.000000e+0	5.545823e-2	1.160571e+1	2.584934e-1	3	3	1.714286e-2	1.000000e+0	1	1	18	CpG_257,CpG_258,CpG_259	CpG_257,CpG_258,CpG_259	Bcas3	Bcas3
GO Biological Process	GO:1990266	neutrophil migration	146	6.297170e-4	1.000000e+0	5.545823e-2	1.160571e+1	2.584934e-1	3	3	1.714286e-2	1.000000e+0	1	1	74	CpG_40,CpG_41,CpG_42	CpG_40,CpG_41,CpG_42	Tgfb2	Tgfb2
GO Biological Process	GO:1904424	regulation of GTP binding	146	6.297170e-4	1.000000e+0	5.545823e-2	1.160571e+1	2.584934e-1	3	3	1.714286e-2	1.000000e+0	1	1	6	CpG_40,CpG_41,CpG_42	CpG_40,CpG_41,CpG_42	Tgfb2	Tgfb2
GO Biological Process	GO:1903701	substantia propria of cornea development	146	6.297170e-4	1.000000e+0	5.545823e-2	1.160571e+1	2.584934e-1	3	3	1.714286e-2	1.000000e+0	1	1	1	CpG_40,CpG_41,CpG_42	CpG_40,CpG_41,CpG_42	Tgfb2	Tgfb2
GO Biological Process	GO:1901211	negative regulation of cardiac chamber formation	146	6.297170e-4	1.000000e+0	5.545823e-2	1.160571e+1	2.584934e-1	3	3	1.714286e-2	1.000000e+0	1	1	1	CpG_257,CpG_258,CpG_259	CpG_257,CpG_258,CpG_259	Tbx2	Tbx2
GO Biological Process	GO:1901213	regulation of transcription from RNA polymerase II promoter involved in heart development	146	6.297170e-4	1.000000e+0	5.545823e-2	1.160571e+1	2.584934e-1	3	3	1.714286e-2	1.000000e+0	1	1	13	CpG_257,CpG_258,CpG_259	CpG_257,CpG_258,CpG_259	Tbx2	Tbx2
GO Biological Process	GO:1901208	negative regulation of heart looping	146	6.297170e-4	1.000000e+0	5.545823e-2	1.160571e+1	2.584934e-1	3	3	1.714286e-2	1.000000e+0	1	1	1	CpG_257,CpG_258,CpG_259	CpG_257,CpG_258,CpG_259	Tbx2	Tbx2
GO Biological Process	GO:0098743	cell aggregation	146	6.297170e-4	1.000000e+0	5.545823e-2	1.160571e+1	2.584934e-1	3	3	1.714286e-2	1.000000e+0	1	1	21	CpG_40,CpG_41,CpG_42	CpG_40,CpG_41,CpG_42	Tgfb2	Tgfb2
GO Biological Process	GO:0098734	macromolecule depalmitoylation	146	6.297170e-4	1.000000e+0	5.545823e-2	1.160571e+1	2.584934e-1	3	3	1.714286e-2	1.000000e+0	1	1	13	CpG_40,CpG_41,CpG_42	CpG_40,CpG_41,CpG_42	Lyplal1	Lyplal1
GO Biological Process	GO:1901220	negative regulation of cardiac chamber morphogenesis	146	6.297170e-4	1.000000e+0	5.545823e-2	1.160571e+1	2.584934e-1	3	3	1.714286e-2	1.000000e+0	1	1	2	CpG_257,CpG_258,CpG_259	CpG_257,CpG_258,CpG_259	Tbx2	Tbx2
GO Biological Process	GO:1901889	negative regulation of cell junction assembly	146	6.297170e-4	1.000000e+0	5.545823e-2	1.160571e+1	2.584934e-1	3	3	1.714286e-2	1.000000e+0	1	1	19	CpG_257,CpG_258,CpG_259	CpG_257,CpG_258,CpG_259	Bcas3	Bcas3
GO Biological Process	GO:1903392	negative regulation of adherens junction organization	146	6.297170e-4	1.000000e+0	5.545823e-2	1.160571e+1	2.584934e-1	3	3	1.714286e-2	1.000000e+0	1	1	15	CpG_257,CpG_258,CpG_259	CpG_257,CpG_258,CpG_259	Bcas3	Bcas3
GO Biological Process	GO:1903391	regulation of adherens junction organization	146	6.297170e-4	1.000000e+0	5.545823e-2	1.160571e+1	2.584934e-1	3	3	1.714286e-2	1.000000e+0	1	1	52	CpG_257,CpG_258,CpG_259	CpG_257,CpG_258,CpG_259	Bcas3	Bcas3
GO Biological Process	GO:1903055	positive regulation of extracellular matrix organization	146	6.297170e-4	1.000000e+0	5.545823e-2	1.160571e+1	2.584934e-1	3	3	1.714286e-2	1.000000e+0	1	1	17	CpG_40,CpG_41,CpG_42	CpG_40,CpG_41,CpG_42	Tgfb2	Tgfb2
GO Biological Process	GO:1902256	regulation of apoptotic process involved in outflow tract morphogenesis	146	6.297170e-4	1.000000e+0	5.545823e-2	1.160571e+1	2.584934e-1	3	3	1.714286e-2	1.000000e+0	1	1	3	CpG_40,CpG_41,CpG_42	CpG_40,CpG_41,CpG_42	Tgfb2	Tgfb2
GO Biological Process	GO:0090398	cellular senescence	146	6.297170e-4	1.000000e+0	5.545823e-2	1.160571e+1	2.584934e-1	3	3	1.714286e-2	1.000000e+0	1	1	29	CpG_257,CpG_258,CpG_259	CpG_257,CpG_258,CpG_259	Tbx2	Tbx2
GO Biological Process	GO:1902337	regulation of apoptotic process involved in morphogenesis	146	6.297170e-4	1.000000e+0	5.545823e-2	1.160571e+1	2.584934e-1	3	3	1.714286e-2	1.000000e+0	1	1	13	CpG_40,CpG_41,CpG_42	CpG_40,CpG_41,CpG_42	Tgfb2	Tgfb2
GO Biological Process	GO:0001502	cartilage condensation	146	6.297170e-4	1.000000e+0	5.545823e-2	1.160571e+1	2.584934e-1	3	3	1.714286e-2	1.000000e+0	1	1	20	CpG_40,CpG_41,CpG_42	CpG_40,CpG_41,CpG_42	Tgfb2	Tgfb2
GO Biological Process	GO:0008343	adult feeding behavior	146	6.297170e-4	1.000000e+0	5.545823e-2	1.160571e+1	2.584934e-1	3	3	1.714286e-2	1.000000e+0	1	1	9	CpG_1307,CpG_1308,CpG_1309	CpG_1307,CpG_1308,CpG_1309	Dmbx1	Dmbx1
GO Biological Process	GO:0007521	muscle cell fate determination	146	6.297170e-4	1.000000e+0	5.545823e-2	1.160571e+1	2.584934e-1	3	3	1.714286e-2	1.000000e+0	1	1	2	CpG_257,CpG_258,CpG_259	CpG_257,CpG_258,CpG_259	Tbx2	Tbx2
GO Biological Process	GO:0007184	SMAD protein import into nucleus	146	6.297170e-4	1.000000e+0	5.545823e-2	1.160571e+1	2.584934e-1	3	3	1.714286e-2	1.000000e+0	1	1	9	CpG_40,CpG_41,CpG_42	CpG_40,CpG_41,CpG_42	Tgfb2	Tgfb2
GO Biological Process	GO:0007179	transforming growth factor beta receptor signaling pathway	146	6.297170e-4	1.000000e+0	5.545823e-2	1.160571e+1	2.584934e-1	3	3	1.714286e-2	1.000000e+0	1	1	74	CpG_40,CpG_41,CpG_42	CpG_40,CpG_41,CpG_42	Tgfb2	Tgfb2
GO Biological Process	GO:0008347	glial cell migration	146	6.297170e-4	1.000000e+0	5.545823e-2	1.160571e+1	2.584934e-1	3	3	1.714286e-2	1.000000e+0	1	1	40	CpG_40,CpG_41,CpG_42	CpG_40,CpG_41,CpG_42	Tgfb2	Tgfb2
GO Biological Process	GO:0051895	negative regulation of focal adhesion assembly	146	6.297170e-4	1.000000e+0	5.545823e-2	1.160571e+1	2.584934e-1	3	3	1.714286e-2	1.000000e+0	1	1	14	CpG_257,CpG_258,CpG_259	CpG_257,CpG_258,CpG_259	Bcas3	Bcas3
GO Biological Process	GO:0010936	negative regulation of macrophage cytokine production	146	6.297170e-4	1.000000e+0	5.545823e-2	1.160571e+1	2.584934e-1	3	3	1.714286e-2	1.000000e+0	1	1	5	CpG_40,CpG_41,CpG_42	CpG_40,CpG_41,CpG_42	Tgfb2	Tgfb2
GO Biological Process	GO:0014855	striated muscle cell proliferation	146	6.297170e-4	1.000000e+0	5.545823e-2	1.160571e+1	2.584934e-1	3	3	1.714286e-2	1.000000e+0	1	1	18	CpG_40,CpG_41,CpG_42	CpG_40,CpG_41,CpG_42	Tgfb2	Tgfb2
GO Biological Process	GO:0010935	regulation of macrophage cytokine production	146	6.297170e-4	1.000000e+0	5.545823e-2	1.160571e+1	2.584934e-1	3	3	1.714286e-2	1.000000e+0	1	1	13	CpG_40,CpG_41,CpG_42	CpG_40,CpG_41,CpG_42	Tgfb2	Tgfb2
GO Biological Process	GO:0010719	negative regulation of epithelial to mesenchymal transition	146	6.297170e-4	1.000000e+0	5.545823e-2	1.160571e+1	2.584934e-1	3	3	1.714286e-2	1.000000e+0	1	1	26	CpG_40,CpG_41,CpG_42	CpG_40,CpG_41,CpG_42	Tgfb2	Tgfb2
GO Biological Process	GO:0010693	negative regulation of alkaline phosphatase activity	146	6.297170e-4	1.000000e+0	5.545823e-2	1.160571e+1	2.584934e-1	3	3	1.714286e-2	1.000000e+0	1	1	4	CpG_40,CpG_41,CpG_42	CpG_40,CpG_41,CpG_42	Tgfb2	Tgfb2
GO Biological Process	GO:0006584	catecholamine metabolic process	146	6.297170e-4	1.000000e+0	5.545823e-2	1.160571e+1	2.584934e-1	3	3	1.714286e-2	1.000000e+0	1	1	41	CpG_40,CpG_41,CpG_42	CpG_40,CpG_41,CpG_42	Tgfb2	Tgfb2
GO Biological Process	GO:0003289	atrial septum primum morphogenesis	146	6.297170e-4	1.000000e+0	5.545823e-2	1.160571e+1	2.584934e-1	3	3	1.714286e-2	1.000000e+0	1	1	5	CpG_40,CpG_41,CpG_42	CpG_40,CpG_41,CpG_42	Tgfb2	Tgfb2
GO Biological Process	GO:0003171	atrioventricular valve development	146	6.297170e-4	1.000000e+0	5.545823e-2	1.160571e+1	2.584934e-1	3	3	1.714286e-2	1.000000e+0	1	1	27	CpG_40,CpG_41,CpG_42	CpG_40,CpG_41,CpG_42	Tgfb2	Tgfb2
GO Biological Process	GO:0003179	heart valve morphogenesis	146	6.297170e-4	1.000000e+0	5.545823e-2	1.160571e+1	2.584934e-1	3	3	1.714286e-2	1.000000e+0	1	1	40	CpG_40,CpG_41,CpG_42	CpG_40,CpG_41,CpG_42	Tgfb2	Tgfb2
GO Biological Process	GO:0003170	heart valve development	146	6.297170e-4	1.000000e+0	5.545823e-2	1.160571e+1	2.584934e-1	3	3	1.714286e-2	1.000000e+0	1	1	47	CpG_40,CpG_41,CpG_42	CpG_40,CpG_41,CpG_42	Tgfb2	Tgfb2
GO Biological Process	GO:0002084	protein depalmitoylation	146	6.297170e-4	1.000000e+0	5.545823e-2	1.160571e+1	2.584934e-1	3	3	1.714286e-2	1.000000e+0	1	1	9	CpG_40,CpG_41,CpG_42	CpG_40,CpG_41,CpG_42	Lyplal1	Lyplal1
GO Biological Process	GO:0001953	negative regulation of cell-matrix adhesion	146	6.297170e-4	1.000000e+0	5.545823e-2	1.160571e+1	2.584934e-1	3	3	1.714286e-2	1.000000e+0	1	1	31	CpG_257,CpG_258,CpG_259	CpG_257,CpG_258,CpG_259	Bcas3	Bcas3
GO Biological Process	GO:0003181	atrioventricular valve morphogenesis	146	6.297170e-4	1.000000e+0	5.545823e-2	1.160571e+1	2.584934e-1	3	3	1.714286e-2	1.000000e+0	1	1	24	CpG_40,CpG_41,CpG_42	CpG_40,CpG_41,CpG_42	Tgfb2	Tgfb2
GO Biological Process	GO:0003184	pulmonary valve morphogenesis	146	6.297170e-4	1.000000e+0	5.545823e-2	1.160571e+1	2.584934e-1	3	3	1.714286e-2	1.000000e+0	1	1	13	CpG_40,CpG_41,CpG_42	CpG_40,CpG_41,CpG_42	Tgfb2	Tgfb2
GO Biological Process	GO:0003284	septum primum development	146	6.297170e-4	1.000000e+0	5.545823e-2	1.160571e+1	2.584934e-1	3	3	1.714286e-2	1.000000e+0	1	1	6	CpG_40,CpG_41,CpG_42	CpG_40,CpG_41,CpG_42	Tgfb2	Tgfb2
GO Biological Process	GO:0003283	atrial septum development	146	6.297170e-4	1.000000e+0	5.545823e-2	1.160571e+1	2.584934e-1	3	3	1.714286e-2	1.000000e+0	1	1	21	CpG_40,CpG_41,CpG_42	CpG_40,CpG_41,CpG_42	Tgfb2	Tgfb2
GO Biological Process	GO:0003274	endocardial cushion fusion	146	6.297170e-4	1.000000e+0	5.545823e-2	1.160571e+1	2.584934e-1	3	3	1.714286e-2	1.000000e+0	1	1	3	CpG_40,CpG_41,CpG_42	CpG_40,CpG_41,CpG_42	Tgfb2	Tgfb2
GO Biological Process	GO:0003256	regulation of transcription from RNA polymerase II promoter involved in myocardial precursor cell differentiation	146	6.297170e-4	1.000000e+0	5.545823e-2	1.160571e+1	2.584934e-1	3	3	1.714286e-2	1.000000e+0	1	1	7	CpG_257,CpG_258,CpG_259	CpG_257,CpG_258,CpG_259	Tbx2	Tbx2
GO Biological Process	GO:0030199	collagen fibril organization	146	6.297170e-4	1.000000e+0	5.545823e-2	1.160571e+1	2.584934e-1	3	3	1.714286e-2	1.000000e+0	1	1	42	CpG_40,CpG_41,CpG_42	CpG_40,CpG_41,CpG_42	Tgfb2	Tgfb2
GO Biological Process	GO:0010692	regulation of alkaline phosphatase activity	146	6.297170e-4	1.000000e+0	5.545823e-2	1.160571e+1	2.584934e-1	3	3	1.714286e-2	1.000000e+0	1	1	10	CpG_40,CpG_41,CpG_42	CpG_40,CpG_41,CpG_42	Tgfb2	Tgfb2
GO Biological Process	GO:0045992	negative regulation of embryonic development	146	6.297170e-4	1.000000e+0	5.545823e-2	1.160571e+1	2.584934e-1	3	3	1.714286e-2	1.000000e+0	1	1	28	CpG_257,CpG_258,CpG_259	CpG_257,CpG_258,CpG_259	Tbx2	Tbx2
GO Biological Process	GO:0046189	phenol-containing compound biosynthetic process	146	6.297170e-4	1.000000e+0	5.545823e-2	1.160571e+1	2.584934e-1	3	3	1.714286e-2	1.000000e+0	1	1	36	CpG_40,CpG_41,CpG_42	CpG_40,CpG_41,CpG_42	Tgfb2	Tgfb2
GO Biological Process	GO:0045823	positive regulation of heart contraction	146	6.297170e-4	1.000000e+0	5.545823e-2	1.160571e+1	2.584934e-1	3	3	1.714286e-2	1.000000e+0	1	1	33	CpG_40,CpG_41,CpG_42	CpG_40,CpG_41,CpG_42	Tgfb2	Tgfb2
GO Biological Process	GO:0045726	positive regulation of integrin biosynthetic process	146	6.297170e-4	1.000000e+0	5.545823e-2	1.160571e+1	2.584934e-1	3	3	1.714286e-2	1.000000e+0	1	1	3	CpG_40,CpG_41,CpG_42	CpG_40,CpG_41,CpG_42	Tgfb2	Tgfb2
GO Biological Process	GO:0045617	negative regulation of keratinocyte differentiation	146	6.297170e-4	1.000000e+0	5.545823e-2	1.160571e+1	2.584934e-1	3	3	1.714286e-2	1.000000e+0	1	1	9	CpG_40,CpG_41,CpG_42	CpG_40,CpG_41,CpG_42	Tgfb2	Tgfb2
GO Biological Process	GO:0030593	neutrophil chemotaxis	146	6.297170e-4	1.000000e+0	5.545823e-2	1.160571e+1	2.584934e-1	3	3	1.714286e-2	1.000000e+0	1	1	65	CpG_40,CpG_41,CpG_42	CpG_40,CpG_41,CpG_42	Tgfb2	Tgfb2
GO Biological Process	GO:0048596	embryonic camera-type eye morphogenesis	146	6.297170e-4	1.000000e+0	5.545823e-2	1.160571e+1	2.584934e-1	3	3	1.714286e-2	1.000000e+0	1	1	28	CpG_257,CpG_258,CpG_259	CpG_257,CpG_258,CpG_259	Tbx2	Tbx2
GO Biological Process	GO:0051893	regulation of focal adhesion assembly	146	6.297170e-4	1.000000e+0	5.545823e-2	1.160571e+1	2.584934e-1	3	3	1.714286e-2	1.000000e+0	1	1	49	CpG_257,CpG_258,CpG_259	CpG_257,CpG_258,CpG_259	Bcas3	Bcas3
GO Biological Process	GO:0051795	positive regulation of catagen	146	6.297170e-4	1.000000e+0	5.545823e-2	1.160571e+1	2.584934e-1	3	3	1.714286e-2	1.000000e+0	1	1	3	CpG_40,CpG_41,CpG_42	CpG_40,CpG_41,CpG_42	Tgfb2	Tgfb2
GO Biological Process	GO:0051794	regulation of catagen	146	6.297170e-4	1.000000e+0	5.545823e-2	1.160571e+1	2.584934e-1	3	3	1.714286e-2	1.000000e+0	1	1	4	CpG_40,CpG_41,CpG_42	CpG_40,CpG_41,CpG_42	Tgfb2	Tgfb2
GO Biological Process	GO:0048820	hair follicle maturation	146	6.297170e-4	1.000000e+0	5.545823e-2	1.160571e+1	2.584934e-1	3	3	1.714286e-2	1.000000e+0	1	1	8	CpG_40,CpG_41,CpG_42	CpG_40,CpG_41,CpG_42	Tgfb2	Tgfb2
GO Biological Process	GO:0045113	regulation of integrin biosynthetic process	146	6.297170e-4	1.000000e+0	5.545823e-2	1.160571e+1	2.584934e-1	3	3	1.714286e-2	1.000000e+0	1	1	5	CpG_40,CpG_41,CpG_42	CpG_40,CpG_41,CpG_42	Tgfb2	Tgfb2
GO Biological Process	GO:0046580	negative regulation of Ras protein signal transduction	146	6.297170e-4	1.000000e+0	5.545823e-2	1.160571e+1	2.584934e-1	3	3	1.714286e-2	1.000000e+0	1	1	50	CpG_40,CpG_41,CpG_42	CpG_40,CpG_41,CpG_42	Tgfb2	Tgfb2
GO Biological Process	GO:0033628	regulation of cell adhesion mediated by integrin	146	6.297170e-4	1.000000e+0	5.545823e-2	1.160571e+1	2.584934e-1	3	3	1.714286e-2	1.000000e+0	1	1	37	CpG_40,CpG_41,CpG_42	CpG_40,CpG_41,CpG_42	Tgfb2	Tgfb2
GO Biological Process	GO:0033630	positive regulation of cell adhesion mediated by integrin	146	6.297170e-4	1.000000e+0	5.545823e-2	1.160571e+1	2.584934e-1	3	3	1.714286e-2	1.000000e+0	1	1	18	CpG_40,CpG_41,CpG_42	CpG_40,CpG_41,CpG_42	Tgfb2	Tgfb2
GO Biological Process	GO:0033002	muscle cell proliferation	146	6.297170e-4	1.000000e+0	5.545823e-2	1.160571e+1	2.584934e-1	3	3	1.714286e-2	1.000000e+0	1	1	22	CpG_40,CpG_41,CpG_42	CpG_40,CpG_41,CpG_42	Tgfb2	Tgfb2
GO Biological Process	GO:0031076	embryonic camera-type eye development	146	6.297170e-4	1.000000e+0	5.545823e-2	1.160571e+1	2.584934e-1	3	3	1.714286e-2	1.000000e+0	1	1	40	CpG_257,CpG_258,CpG_259	CpG_257,CpG_258,CpG_259	Tbx2	Tbx2
GO Biological Process	GO:0042997	negative regulation of Golgi to plasma membrane protein transport	146	6.297170e-4	1.000000e+0	5.545823e-2	1.160571e+1	2.584934e-1	3	3	1.714286e-2	1.000000e+0	1	1	5	CpG_40,CpG_41,CpG_42	CpG_40,CpG_41,CpG_42	Lyplal1	Lyplal1
GO Biological Process	GO:0035910	ascending aorta morphogenesis	146	6.297170e-4	1.000000e+0	5.545823e-2	1.160571e+1	2.584934e-1	3	3	1.714286e-2	1.000000e+0	1	1	4	CpG_40,CpG_41,CpG_42	CpG_40,CpG_41,CpG_42	Tgfb2	Tgfb2
GO Biological Process	GO:0036302	atrioventricular canal development	146	6.297170e-4	1.000000e+0	5.545823e-2	1.160571e+1	2.584934e-1	3	3	1.714286e-2	1.000000e+0	1	1	8	CpG_257,CpG_258,CpG_259	CpG_257,CpG_258,CpG_259	Tbx2	Tbx2
GO Biological Process	GO:0042637	catagen	146	6.297170e-4	1.000000e+0	5.545823e-2	1.160571e+1	2.584934e-1	3	3	1.714286e-2	1.000000e+0	1	1	1	CpG_40,CpG_41,CpG_42	CpG_40,CpG_41,CpG_42	Tgfb2	Tgfb2
GO Biological Process	GO:0042996	regulation of Golgi to plasma membrane protein transport	146	6.297170e-4	1.000000e+0	5.545823e-2	1.160571e+1	2.584934e-1	3	3	1.714286e-2	1.000000e+0	1	1	9	CpG_40,CpG_41,CpG_42	CpG_40,CpG_41,CpG_42	Lyplal1	Lyplal1
GO Biological Process	GO:0042423	catecholamine biosynthetic process	146	6.297170e-4	1.000000e+0	5.545823e-2	1.160571e+1	2.584934e-1	3	3	1.714286e-2	1.000000e+0	1	1	21	CpG_40,CpG_41,CpG_42	CpG_40,CpG_41,CpG_42	Tgfb2	Tgfb2
GO Biological Process	GO:0042417	dopamine metabolic process	146	6.297170e-4	1.000000e+0	5.545823e-2	1.160571e+1	2.584934e-1	3	3	1.714286e-2	1.000000e+0	1	1	27	CpG_40,CpG_41,CpG_42	CpG_40,CpG_41,CpG_42	Tgfb2	Tgfb2
GO Biological Process	GO:0042416	dopamine biosynthetic process	146	6.297170e-4	1.000000e+0	5.545823e-2	1.160571e+1	2.584934e-1	3	3	1.714286e-2	1.000000e+0	1	1	12	CpG_40,CpG_41,CpG_42	CpG_40,CpG_41,CpG_42	Tgfb2	Tgfb2
GO Biological Process	GO:0098771	inorganic ion homeostasis	250	6.813616e-4	1.000000e+0	3.504379e-2	2.380659e+0	6.720827e+0	16	78	9.142857e-2	2.051282e-1	8	13	602	CpG_1539,CpG_1540,CpG_1815,CpG_1816,CpG_1818,CpG_1820,CpG_1822,CpG_1824,CpG_1826,CpG_1828,CpG_1866,CpG_207,CpG_315,CpG_358,CpG_566,CpG_766	CpG_1222,CpG_1223,CpG_1224,CpG_1518,CpG_1519,CpG_1520,CpG_1521,CpG_1539,CpG_1540,CpG_1541,CpG_1542,CpG_1543,CpG_1595,CpG_1596,CpG_1597,CpG_1598,CpG_1599,CpG_1815,CpG_1816,CpG_1817,CpG_1818,CpG_1819,CpG_1820,CpG_1821,CpG_1822,CpG_1823,CpG_1824,CpG_1825,CpG_1826,CpG_1827,CpG_1828,CpG_1829,CpG_1830,CpG_1831,CpG_1856,CpG_1857,CpG_1858,CpG_1859,CpG_1860,CpG_1861,CpG_1862,CpG_1863,CpG_1864,CpG_1865,CpG…	Arf1,C1qtnf1,Calb2,Gata2,Nol3,Scara5,Sod1,Wnk4	Aco1,Apoe,Arf1,C1qtnf1,Calb2,Gata2,Mcur1,Nol3,Ptprc,Scara5,Sod1,Tacr1,Wnk4
GO Biological Process	GO:0006873	cellular ion homeostasis	250	6.813616e-4	1.000000e+0	3.504379e-2	2.380659e+0	6.720827e+0	16	78	9.142857e-2	2.051282e-1	8	13	520	CpG_1539,CpG_1540,CpG_1815,CpG_1816,CpG_1818,CpG_1820,CpG_1822,CpG_1824,CpG_1826,CpG_1828,CpG_1866,CpG_207,CpG_315,CpG_358,CpG_566,CpG_766	CpG_1222,CpG_1223,CpG_1224,CpG_1518,CpG_1519,CpG_1520,CpG_1521,CpG_1539,CpG_1540,CpG_1541,CpG_1542,CpG_1543,CpG_1595,CpG_1596,CpG_1597,CpG_1598,CpG_1599,CpG_1815,CpG_1816,CpG_1817,CpG_1818,CpG_1819,CpG_1820,CpG_1821,CpG_1822,CpG_1823,CpG_1824,CpG_1825,CpG_1826,CpG_1827,CpG_1828,CpG_1829,CpG_1830,CpG_1831,CpG_1856,CpG_1857,CpG_1858,CpG_1859,CpG_1860,CpG_1861,CpG_1862,CpG_1863,CpG_1864,CpG_1865,CpG…	Arf1,C1qtnf1,Calb2,Gata2,Nol3,Scara5,Sod1,Wnk4	Aco1,Apoe,Arf1,C1qtnf1,Calb2,Gata2,Mcur1,Nol3,Ptprc,Scara5,Sod1,Tacr1,Wnk4
GO Biological Process	GO:0050801	ion homeostasis	250	6.813616e-4	1.000000e+0	3.504379e-2	2.380659e+0	6.720827e+0	16	78	9.142857e-2	2.051282e-1	8	13	629	CpG_1539,CpG_1540,CpG_1815,CpG_1816,CpG_1818,CpG_1820,CpG_1822,CpG_1824,CpG_1826,CpG_1828,CpG_1866,CpG_207,CpG_315,CpG_358,CpG_566,CpG_766	CpG_1222,CpG_1223,CpG_1224,CpG_1518,CpG_1519,CpG_1520,CpG_1521,CpG_1539,CpG_1540,CpG_1541,CpG_1542,CpG_1543,CpG_1595,CpG_1596,CpG_1597,CpG_1598,CpG_1599,CpG_1815,CpG_1816,CpG_1817,CpG_1818,CpG_1819,CpG_1820,CpG_1821,CpG_1822,CpG_1823,CpG_1824,CpG_1825,CpG_1826,CpG_1827,CpG_1828,CpG_1829,CpG_1830,CpG_1831,CpG_1856,CpG_1857,CpG_1858,CpG_1859,CpG_1860,CpG_1861,CpG_1862,CpG_1863,CpG_1864,CpG_1865,CpG…	Arf1,C1qtnf1,Calb2,Gata2,Nol3,Scara5,Sod1,Wnk4	Aco1,Apoe,Arf1,C1qtnf1,Calb2,Gata2,Mcur1,Nol3,Ptprc,Scara5,Sod1,Tacr1,Wnk4
GO Biological Process	GO:0010812	negative regulation of cell-substrate adhesion	253	6.967665e-4	1.000000e+0	3.541116e-2	7.737143e+0	5.169867e-1	4	6	2.285714e-2	6.666667e-1	2	2	51	CpG_257,CpG_258,CpG_259,CpG_640	CpG_257,CpG_258,CpG_259,CpG_640,CpG_641,CpG_642	Bcas3,Fbln1	Bcas3,Fbln1
GO Biological Process	GO:0016569	covalent chromatin modification	254	7.548276e-4	1.000000e+0	3.821092e-2	2.222371e+0	8.099458e+0	18	94	1.028571e-1	1.914894e-1	7	13	473	CpG_1360,CpG_1815,CpG_1816,CpG_1818,CpG_1820,CpG_1822,CpG_1824,CpG_1826,CpG_1828,CpG_282,CpG_283,CpG_287,CpG_289,CpG_476,CpG_907,CpG_914,CpG_932,CpG_938	CpG_1354,CpG_1355,CpG_1356,CpG_1357,CpG_1358,CpG_1359,CpG_1360,CpG_1446,CpG_1447,CpG_1448,CpG_1449,CpG_1450,CpG_1451,CpG_1452,CpG_1670,CpG_1671,CpG_1815,CpG_1816,CpG_1817,CpG_1818,CpG_1819,CpG_1820,CpG_1821,CpG_1822,CpG_1823,CpG_1824,CpG_1825,CpG_1826,CpG_1827,CpG_1828,CpG_1829,CpG_1830,CpG_1831,CpG_280,CpG_281,CpG_282,CpG_283,CpG_284,CpG_285,CpG_286,CpG_287,CpG_288,CpG_289,CpG_290,CpG_291,CpG_29…	Epop,Hsf4,Mbd2,Padi4,Padi6,Rcor1,Rps6ka4	Cbx4,Cbx8,Chd2,Epop,Hsf4,Mbd2,Padi4,Padi6,Rcor1,Rps6ka4,Satb1,Setd1b,Vrk1
GO Biological Process	GO:0010506	regulation of autophagy	255	7.771339e-4	1.000000e+0	3.918583e-2	3.136680e+0	3.188085e+0	10	37	5.714286e-2	2.702703e-1	5	8	217	CpG_1322,CpG_1693,CpG_184,CpG_501,CpG_502,CpG_504,CpG_983,CpG_985,CpG_986,CpG_987	CpG_1322,CpG_1323,CpG_1688,CpG_1689,CpG_1690,CpG_1691,CpG_1692,CpG_1693,CpG_1726,CpG_1727,CpG_1728,CpG_1729,CpG_1773,CpG_1774,CpG_1775,CpG_1776,CpG_1777,CpG_184,CpG_185,CpG_186,CpG_187,CpG_188,CpG_189,CpG_500,CpG_501,CpG_502,CpG_503,CpG_504,CpG_874,CpG_875,CpG_983,CpG_984,CpG_985,CpG_986,CpG_987,CpG_988,CpG_989	Atpif1,Dapk1,Irgm1,Pip4k2a,Uvrag	Atpif1,Dapk1,Irgm1,Mtcl1,Nlrp6,Nod2,Pip4k2a,Uvrag
GO Biological Process	GO:0070509	calcium ion import	256	7.806228e-4	1.000000e+0	3.920800e-2	3.713829e+0	2.154111e+0	8	25	4.571429e-2	3.200000e-1	1	3	81	CpG_1815,CpG_1816,CpG_1818,CpG_1820,CpG_1822,CpG_1824,CpG_1826,CpG_1828	CpG_1815,CpG_1816,CpG_1817,CpG_1818,CpG_1819,CpG_1820,CpG_1821,CpG_1822,CpG_1823,CpG_1824,CpG_1825,CpG_1826,CpG_1827,CpG_1828,CpG_1829,CpG_1830,CpG_1831,CpG_31,CpG_32,CpG_33,CpG_34,CpG_494,CpG_495,CpG_496,CpG_497	Nol3	Mcur1,Nol3,Ptprc
GO Biological Process	GO:0060401	cytosolic calcium ion transport	256	7.806228e-4	1.000000e+0	3.920800e-2	3.713829e+0	2.154111e+0	8	25	4.571429e-2	3.200000e-1	1	3	72	CpG_1815,CpG_1816,CpG_1818,CpG_1820,CpG_1822,CpG_1824,CpG_1826,CpG_1828	CpG_1815,CpG_1816,CpG_1817,CpG_1818,CpG_1819,CpG_1820,CpG_1821,CpG_1822,CpG_1823,CpG_1824,CpG_1825,CpG_1826,CpG_1827,CpG_1828,CpG_1829,CpG_1830,CpG_1831,CpG_31,CpG_32,CpG_33,CpG_34,CpG_494,CpG_495,CpG_496,CpG_497	Nol3	Mcur1,Nol3,Ptprc
GO Biological Process	GO:2000021	regulation of ion homeostasis	256	7.806228e-4	1.000000e+0	3.920800e-2	3.713829e+0	2.154111e+0	8	25	4.571429e-2	3.200000e-1	1	3	193	CpG_1815,CpG_1816,CpG_1818,CpG_1820,CpG_1822,CpG_1824,CpG_1826,CpG_1828	CpG_1518,CpG_1519,CpG_1520,CpG_1521,CpG_1815,CpG_1816,CpG_1817,CpG_1818,CpG_1819,CpG_1820,CpG_1821,CpG_1822,CpG_1823,CpG_1824,CpG_1825,CpG_1826,CpG_1827,CpG_1828,CpG_1829,CpG_1830,CpG_1831,CpG_31,CpG_32,CpG_33,CpG_34	Nol3	Nol3,Ptprc,Tacr1
GO Biological Process	GO:0010466	negative regulation of peptidase activity	256	7.806228e-4	1.000000e+0	3.920800e-2	3.713829e+0	2.154111e+0	8	25	4.571429e-2	3.200000e-1	1	2	286	CpG_1815,CpG_1816,CpG_1818,CpG_1820,CpG_1822,CpG_1824,CpG_1826,CpG_1828	CpG_1815,CpG_1816,CpG_1817,CpG_1818,CpG_1819,CpG_1820,CpG_1821,CpG_1822,CpG_1823,CpG_1824,CpG_1825,CpG_1826,CpG_1827,CpG_1828,CpG_1829,CpG_1830,CpG_1831,CpG_810,CpG_811,CpG_812,CpG_813,CpG_814,CpG_815,CpG_816,CpG_817	Nol3	Nol3,Pi16
GO Biological Process	GO:0042990	regulation of transcription factor import into nucleus	256	7.806228e-4	1.000000e+0	3.920800e-2	3.713829e+0	2.154111e+0	8	25	4.571429e-2	3.200000e-1	1	3	80	CpG_1815,CpG_1816,CpG_1818,CpG_1820,CpG_1822,CpG_1824,CpG_1826,CpG_1828	CpG_1222,CpG_1223,CpG_1224,CpG_1773,CpG_1774,CpG_1775,CpG_1776,CpG_1777,CpG_1815,CpG_1816,CpG_1817,CpG_1818,CpG_1819,CpG_1820,CpG_1821,CpG_1822,CpG_1823,CpG_1824,CpG_1825,CpG_1826,CpG_1827,CpG_1828,CpG_1829,CpG_1830,CpG_1831	Nol3	Cyld,Ddx58,Nol3
GO Biological Process	GO:0006470	protein dephosphorylation	256	7.806228e-4	1.000000e+0	3.920800e-2	3.713829e+0	2.154111e+0	8	25	4.571429e-2	3.200000e-1	1	5	179	CpG_990,CpG_991,CpG_994,CpG_995,CpG_996,CpG_997,CpG_998,CpG_999	CpG_1217,CpG_1218,CpG_1219,CpG_31,CpG_32,CpG_33,CpG_34,CpG_567,CpG_568,CpG_614,CpG_615,CpG_616,CpG_617,CpG_618,CpG_619,CpG_990,CpG_991,CpG_992,CpG_993,CpG_994,CpG_995,CpG_996,CpG_997,CpG_998,CpG_999	Phpt1	Cttnbp2nl,Phpt1,Ppp2r2a,Ptprc,Sh3bp1
GO Biological Process	GO:0031532	actin cytoskeleton reorganization	262	7.912564e-4	1.000000e+0	3.883196e-2	5.802857e+0	8.616445e-1	5	10	2.857143e-2	5.000000e-1	1	1	57	CpG_1492,CpG_1493,CpG_1495,CpG_1496,CpG_1497	CpG_1492,CpG_1493,CpG_1494,CpG_1495,CpG_1496,CpG_1497,CpG_1498,CpG_1499,CpG_1500,CpG_1501	Mkln1	Mkln1
GO Biological Process	GO:0061024	membrane organization	263	8.122620e-4	1.000000e+0	3.971127e-2	1.908835e+0	1.309700e+1	25	152	1.428571e-1	1.644737e-1	11	25	755	CpG_1014,CpG_1023,CpG_1322,CpG_1660,CpG_1693,CpG_1815,CpG_1816,CpG_1818,CpG_1820,CpG_1822,CpG_1824,CpG_1826,CpG_1828,CpG_207,CpG_235,CpG_723,CpG_730,CpG_766,CpG_80,CpG_82,CpG_838,CpG_840,CpG_842,CpG_845,CpG_847	CpG_1014,CpG_1015,CpG_1016,CpG_1017,CpG_1018,CpG_1019,CpG_1020,CpG_1021,CpG_1022,CpG_1023,CpG_1056,CpG_1057,CpG_1058,CpG_1077,CpG_1078,CpG_1225,CpG_1226,CpG_1227,CpG_1228,CpG_1229,CpG_1239,CpG_1240,CpG_1241,CpG_1242,CpG_1243,CpG_1322,CpG_1323,CpG_1401,CpG_1402,CpG_1403,CpG_1404,CpG_1405,CpG_1406,CpG_1469,CpG_1470,CpG_1595,CpG_1596,CpG_1597,CpG_1598,CpG_1599,CpG_1659,CpG_1660,CpG_1661,CpG_1662,CpG…	Abca7,Arf1,Atp10a,Atpif1,Cstad,Doc2b,Etv5,Mymx,Nol3,Sod1,Uvrag	Abca7,Apoe,Arf1,Atp10a,Atp8b5,Atpif1,Bcl2l11,Cstad,Doc2b,Etv5,Kcnip2,Lin7c,Mpp5,Mymx,Nol3,Reep3,Rftn1,Rhot1,Sec16b,Sec61b,Sh3bp1,Slc35f6,Sod1,Stx1a,Uvrag
GO Biological Process	GO:0072329	monocarboxylic acid catabolic process	264	9.227214e-4	1.000000e+0	4.494073e-2	4.062000e+0	1.723289e+0	7	20	4.000000e-2	3.500000e-1	2	4	91	CpG_1307,CpG_1308,CpG_1309,CpG_1640,CpG_1641,CpG_1642,CpG_1644	CpG_1307,CpG_1308,CpG_1309,CpG_1640,CpG_1641,CpG_1642,CpG_1643,CpG_1644,CpG_486,CpG_487,CpG_529,CpG_530,CpG_531,CpG_532,CpG_533,CpG_534,CpG_535,CpG_536,CpG_537,CpG_538	Cpt1c,Faah	Aldh5a1,Cpt1c,Faah,Hacl1
GO Biological Process	GO:0006325	chromatin organization	265	9.599689e-4	1.000000e+0	4.657842e-2	2.031000e+0	1.033973e+1	21	120	1.200000e-1	1.750000e-1	9	20	676	CpG_1360,CpG_1815,CpG_1816,CpG_1818,CpG_1820,CpG_1822,CpG_1824,CpG_1826,CpG_1828,CpG_21,CpG_22,CpG_282,CpG_283,CpG_287,CpG_289,CpG_476,CpG_84,CpG_907,CpG_914,CpG_932,CpG_938	CpG_1180,CpG_1181,CpG_1182,CpG_1183,CpG_1184,CpG_1354,CpG_1355,CpG_1356,CpG_1357,CpG_1358,CpG_1359,CpG_1360,CpG_1446,CpG_1447,CpG_1448,CpG_1449,CpG_1450,CpG_1451,CpG_1452,CpG_165,CpG_166,CpG_167,CpG_1670,CpG_1671,CpG_168,CpG_169,CpG_170,CpG_171,CpG_1815,CpG_1816,CpG_1817,CpG_1818,CpG_1819,CpG_1820,CpG_1821,CpG_1822,CpG_1823,CpG_1824,CpG_1825,CpG_1826,CpG_1827,CpG_1828,CpG_1829,CpG_1830,CpG_1831,C…	Epop,Hsf4,Mbd2,Mum1,Padi4,Padi6,Rcor1,Rps6ka4,Tnp1	Arid1b,Cbx4,Cbx8,Chd2,Ddx11,Epop,Hist2h2ab,Hist2h2be,Hsf4,Mbd2,Mum1,Npm1,Padi4,Padi6,Rcor1,Rps6ka4,Satb1,Setd1b,Tnp1,Vrk1
GO Biological Process	GO:0010634	positive regulation of epithelial cell migration	266	9.735270e-4	1.000000e+0	4.705868e-2	4.642286e+0	1.292467e+0	6	15	3.428571e-2	4.000000e-1	2	4	116	CpG_257,CpG_258,CpG_259,CpG_40,CpG_41,CpG_42	CpG_1518,CpG_1519,CpG_1520,CpG_1521,CpG_257,CpG_258,CpG_259,CpG_40,CpG_41,CpG_42,CpG_902,CpG_903,CpG_904,CpG_905,CpG_906	Bcas3,Tgfb2	Bcas3,Ccbe1,Tacr1,Tgfb2
GO Biological Process	GO:0010823	negative regulation of mitochondrion organization	267	1.046926e-3	1.000000e+0	5.041713e-2	3.264107e+0	2.757262e+0	9	32	5.142857e-2	2.812500e-1	2	3	50	CpG_1433,CpG_1815,CpG_1816,CpG_1818,CpG_1820,CpG_1822,CpG_1824,CpG_1826,CpG_1828	CpG_1401,CpG_1402,CpG_1403,CpG_1404,CpG_1405,CpG_1406,CpG_1431,CpG_1432,CpG_1433,CpG_1434,CpG_1435,CpG_1436,CpG_1437,CpG_1438,CpG_1439,CpG_1815,CpG_1816,CpG_1817,CpG_1818,CpG_1819,CpG_1820,CpG_1821,CpG_1822,CpG_1823,CpG_1824,CpG_1825,CpG_1826,CpG_1827,CpG_1828,CpG_1829,CpG_1830,CpG_1831	Nol3,Sirt4	Nol3,Sirt4,Slc35f6
GO Biological Process	GO:0007520	myoblast fusion	268	1.350117e-3	1.000000e+0	6.477539e-2	5.275325e+0	9.478090e-1	5	11	2.857143e-2	4.545455e-1	1	1	21	CpG_838,CpG_840,CpG_842,CpG_845,CpG_847	CpG_837,CpG_838,CpG_839,CpG_840,CpG_841,CpG_842,CpG_843,CpG_844,CpG_845,CpG_846,CpG_847	Mymx	Mymx
GO Biological Process	GO:0034504	protein localization to nucleus	268	1.350117e-3	1.000000e+0	6.477539e-2	5.275325e+0	9.478090e-1	5	11	2.857143e-2	4.545455e-1	2	3	180	CpG_40,CpG_41,CpG_42,CpG_80,CpG_82	CpG_1239,CpG_1240,CpG_1241,CpG_1242,CpG_1243,CpG_40,CpG_41,CpG_42,CpG_80,CpG_81,CpG_82	Abca7,Tgfb2	Abca7,Sec61b,Tgfb2
GO Biological Process	GO:0010803	regulation of tumor necrosis factor-mediated signaling pathway	270	1.378395e-3	1.000000e+0	6.564223e-2	3.438730e+0	2.326440e+0	8	27	4.571429e-2	2.962963e-1	1	3	26	CpG_1815,CpG_1816,CpG_1818,CpG_1820,CpG_1822,CpG_1824,CpG_1826,CpG_1828	CpG_1180,CpG_1181,CpG_1182,CpG_1183,CpG_1184,CpG_1773,CpG_1774,CpG_1775,CpG_1776,CpG_1777,CpG_1815,CpG_1816,CpG_1817,CpG_1818,CpG_1819,CpG_1820,CpG_1821,CpG_1822,CpG_1823,CpG_1824,CpG_1825,CpG_1826,CpG_1827,CpG_1828,CpG_1829,CpG_1830,CpG_1831	Nol3	Cyld,Hist2h2be,Nol3
GO Biological Process	GO:0046834	lipid phosphorylation	271	1.447508e-3	1.000000e+0	6.867918e-2	4.352143e+0	1.378631e+0	6	16	3.428571e-2	3.750000e-1	2	2	45	CpG_723,CpG_730,CpG_983,CpG_985,CpG_986,CpG_987	CpG_722,CpG_723,CpG_724,CpG_725,CpG_726,CpG_727,CpG_728,CpG_729,CpG_730,CpG_983,CpG_984,CpG_985,CpG_986,CpG_987,CpG_988,CpG_989	Dgkg,Pip4k2a	Dgkg,Pip4k2a
GO Biological Process	GO:0085029	extracellular matrix assembly	272	1.516645e-3	1.000000e+0	7.169493e-2	6.631837e+0	6.031512e-1	4	7	2.285714e-2	5.714286e-1	1	1	19	CpG_1840,CpG_1841,CpG_1842,CpG_1843	CpG_1839,CpG_1840,CpG_1841,CpG_1842,CpG_1843,CpG_1844,CpG_1845	Has3	Has3
GO Biological Process	GO:0046854	phosphatidylinositol phosphorylation	272	1.516645e-3	1.000000e+0	7.169493e-2	6.631837e+0	6.031512e-1	4	7	2.285714e-2	5.714286e-1	1	1	34	CpG_983,CpG_985,CpG_986,CpG_987	CpG_983,CpG_984,CpG_985,CpG_986,CpG_987,CpG_988,CpG_989	Pip4k2a	Pip4k2a
GO Biological Process	GO:0098751	bone cell development	272	1.516645e-3	1.000000e+0	7.169493e-2	6.631837e+0	6.031512e-1	4	7	2.285714e-2	5.714286e-1	1	1	24	CpG_983,CpG_985,CpG_986,CpG_987	CpG_983,CpG_984,CpG_985,CpG_986,CpG_987,CpG_988,CpG_989	Pip4k2a	Pip4k2a
GO Biological Process	GO:1900106	positive regulation of hyaluranon cable assembly	272	1.516645e-3	1.000000e+0	7.169493e-2	6.631837e+0	6.031512e-1	4	7	2.285714e-2	5.714286e-1	1	1	3	CpG_1840,CpG_1841,CpG_1842,CpG_1843	CpG_1839,CpG_1840,CpG_1841,CpG_1842,CpG_1843,CpG_1844,CpG_1845	Has3	Has3
GO Biological Process	GO:2000786	positive regulation of autophagosome assembly	272	1.516645e-3	1.000000e+0	7.169493e-2	6.631837e+0	6.031512e-1	4	7	2.285714e-2	5.714286e-1	1	1	10	CpG_983,CpG_985,CpG_986,CpG_987	CpG_983,CpG_984,CpG_985,CpG_986,CpG_987,CpG_988,CpG_989	Pip4k2a	Pip4k2a
GO Biological Process	GO:2000785	regulation of autophagosome assembly	272	1.516645e-3	1.000000e+0	7.169493e-2	6.631837e+0	6.031512e-1	4	7	2.285714e-2	5.714286e-1	1	1	34	CpG_983,CpG_985,CpG_986,CpG_987	CpG_983,CpG_984,CpG_985,CpG_986,CpG_987,CpG_988,CpG_989	Pip4k2a	Pip4k2a
GO Biological Process	GO:0046488	phosphatidylinositol metabolic process	272	1.516645e-3	1.000000e+0	7.169493e-2	6.631837e+0	6.031512e-1	4	7	2.285714e-2	5.714286e-1	1	1	109	CpG_983,CpG_985,CpG_986,CpG_987	CpG_983,CpG_984,CpG_985,CpG_986,CpG_987,CpG_988,CpG_989	Pip4k2a	Pip4k2a
GO Biological Process	GO:0061515	myeloid cell development	272	1.516645e-3	1.000000e+0	7.169493e-2	6.631837e+0	6.031512e-1	4	7	2.285714e-2	5.714286e-1	1	1	60	CpG_983,CpG_985,CpG_986,CpG_987	CpG_983,CpG_984,CpG_985,CpG_986,CpG_987,CpG_988,CpG_989	Pip4k2a	Pip4k2a
GO Biological Process	GO:0014068	positive regulation of phosphatidylinositol 3-kinase signaling	272	1.516645e-3	1.000000e+0	7.169493e-2	6.631837e+0	6.031512e-1	4	7	2.285714e-2	5.714286e-1	2	2	61	CpG_1660,CpG_40,CpG_41,CpG_42	CpG_1659,CpG_1660,CpG_1661,CpG_1662,CpG_40,CpG_41,CpG_42	Tgfb2,Ube3a	Tgfb2,Ube3a
GO Biological Process	GO:0045226	extracellular polysaccharide biosynthetic process	272	1.516645e-3	1.000000e+0	7.169493e-2	6.631837e+0	6.031512e-1	4	7	2.285714e-2	5.714286e-1	1	1	3	CpG_1840,CpG_1841,CpG_1842,CpG_1843	CpG_1839,CpG_1840,CpG_1841,CpG_1842,CpG_1843,CpG_1844,CpG_1845	Has3	Has3
GO Biological Process	GO:0030212	hyaluronan metabolic process	272	1.516645e-3	1.000000e+0	7.169493e-2	6.631837e+0	6.031512e-1	4	7	2.285714e-2	5.714286e-1	1	1	22	CpG_1840,CpG_1841,CpG_1842,CpG_1843	CpG_1839,CpG_1840,CpG_1841,CpG_1842,CpG_1843,CpG_1844,CpG_1845	Has3	Has3
GO Biological Process	GO:0030213	hyaluronan biosynthetic process	272	1.516645e-3	1.000000e+0	7.169493e-2	6.631837e+0	6.031512e-1	4	7	2.285714e-2	5.714286e-1	1	1	5	CpG_1840,CpG_1841,CpG_1842,CpG_1843	CpG_1839,CpG_1840,CpG_1841,CpG_1842,CpG_1843,CpG_1844,CpG_1845	Has3	Has3
GO Biological Process	GO:0014066	regulation of phosphatidylinositol 3-kinase signaling	272	1.516645e-3	1.000000e+0	7.169493e-2	6.631837e+0	6.031512e-1	4	7	2.285714e-2	5.714286e-1	2	2	83	CpG_1660,CpG_40,CpG_41,CpG_42	CpG_1659,CpG_1660,CpG_1661,CpG_1662,CpG_40,CpG_41,CpG_42	Tgfb2,Ube3a	Tgfb2,Ube3a
GO Biological Process	GO:0035855	megakaryocyte development	272	1.516645e-3	1.000000e+0	7.169493e-2	6.631837e+0	6.031512e-1	4	7	2.285714e-2	5.714286e-1	1	1	18	CpG_983,CpG_985,CpG_986,CpG_987	CpG_983,CpG_984,CpG_985,CpG_986,CpG_987,CpG_988,CpG_989	Pip4k2a	Pip4k2a
GO Biological Process	GO:0030219	megakaryocyte differentiation	272	1.516645e-3	1.000000e+0	7.169493e-2	6.631837e+0	6.031512e-1	4	7	2.285714e-2	5.714286e-1	1	1	23	CpG_983,CpG_985,CpG_986,CpG_987	CpG_983,CpG_984,CpG_985,CpG_986,CpG_987,CpG_988,CpG_989	Pip4k2a	Pip4k2a
GO Biological Process	GO:0055080	cation homeostasis	287	1.530008e-3	1.000000e+0	6.854649e-2	2.290602e+0	6.548498e+0	15	76	8.571429e-2	1.973684e-1	7	12	585	CpG_1539,CpG_1540,CpG_1815,CpG_1816,CpG_1818,CpG_1820,CpG_1822,CpG_1824,CpG_1826,CpG_1828,CpG_1866,CpG_207,CpG_358,CpG_566,CpG_766	CpG_1222,CpG_1223,CpG_1224,CpG_1518,CpG_1519,CpG_1520,CpG_1521,CpG_1539,CpG_1540,CpG_1541,CpG_1542,CpG_1543,CpG_1595,CpG_1596,CpG_1597,CpG_1598,CpG_1599,CpG_1815,CpG_1816,CpG_1817,CpG_1818,CpG_1819,CpG_1820,CpG_1821,CpG_1822,CpG_1823,CpG_1824,CpG_1825,CpG_1826,CpG_1827,CpG_1828,CpG_1829,CpG_1830,CpG_1831,CpG_1856,CpG_1857,CpG_1858,CpG_1859,CpG_1860,CpG_1861,CpG_1862,CpG_1863,CpG_1864,CpG_1865,CpG…	Arf1,C1qtnf1,Calb2,Gata2,Nol3,Scara5,Sod1	Aco1,Apoe,Arf1,C1qtnf1,Calb2,Gata2,Mcur1,Nol3,Ptprc,Scara5,Sod1,Tacr1
GO Biological Process	GO:0055065	metal ion homeostasis	287	1.530008e-3	1.000000e+0	6.854649e-2	2.290602e+0	6.548498e+0	15	76	8.571429e-2	1.973684e-1	7	12	506	CpG_1539,CpG_1540,CpG_1815,CpG_1816,CpG_1818,CpG_1820,CpG_1822,CpG_1824,CpG_1826,CpG_1828,CpG_1866,CpG_207,CpG_358,CpG_566,CpG_766	CpG_1222,CpG_1223,CpG_1224,CpG_1518,CpG_1519,CpG_1520,CpG_1521,CpG_1539,CpG_1540,CpG_1541,CpG_1542,CpG_1543,CpG_1595,CpG_1596,CpG_1597,CpG_1598,CpG_1599,CpG_1815,CpG_1816,CpG_1817,CpG_1818,CpG_1819,CpG_1820,CpG_1821,CpG_1822,CpG_1823,CpG_1824,CpG_1825,CpG_1826,CpG_1827,CpG_1828,CpG_1829,CpG_1830,CpG_1831,CpG_1856,CpG_1857,CpG_1858,CpG_1859,CpG_1860,CpG_1861,CpG_1862,CpG_1863,CpG_1864,CpG_1865,CpG…	Arf1,C1qtnf1,Calb2,Gata2,Nol3,Scara5,Sod1	Aco1,Apoe,Arf1,C1qtnf1,Calb2,Gata2,Mcur1,Nol3,Ptprc,Scara5,Sod1,Tacr1
GO Biological Process	GO:0030003	cellular cation homeostasis	287	1.530008e-3	1.000000e+0	6.854649e-2	2.290602e+0	6.548498e+0	15	76	8.571429e-2	1.973684e-1	7	12	504	CpG_1539,CpG_1540,CpG_1815,CpG_1816,CpG_1818,CpG_1820,CpG_1822,CpG_1824,CpG_1826,CpG_1828,CpG_1866,CpG_207,CpG_358,CpG_566,CpG_766	CpG_1222,CpG_1223,CpG_1224,CpG_1518,CpG_1519,CpG_1520,CpG_1521,CpG_1539,CpG_1540,CpG_1541,CpG_1542,CpG_1543,CpG_1595,CpG_1596,CpG_1597,CpG_1598,CpG_1599,CpG_1815,CpG_1816,CpG_1817,CpG_1818,CpG_1819,CpG_1820,CpG_1821,CpG_1822,CpG_1823,CpG_1824,CpG_1825,CpG_1826,CpG_1827,CpG_1828,CpG_1829,CpG_1830,CpG_1831,CpG_1856,CpG_1857,CpG_1858,CpG_1859,CpG_1860,CpG_1861,CpG_1862,CpG_1863,CpG_1864,CpG_1865,CpG…	Arf1,C1qtnf1,Calb2,Gata2,Nol3,Scara5,Sod1	Aco1,Apoe,Arf1,C1qtnf1,Calb2,Gata2,Mcur1,Nol3,Ptprc,Scara5,Sod1,Tacr1
GO Biological Process	GO:0006875	cellular metal ion homeostasis	287	1.530008e-3	1.000000e+0	6.854649e-2	2.290602e+0	6.548498e+0	15	76	8.571429e-2	1.973684e-1	7	12	434	CpG_1539,CpG_1540,CpG_1815,CpG_1816,CpG_1818,CpG_1820,CpG_1822,CpG_1824,CpG_1826,CpG_1828,CpG_1866,CpG_207,CpG_358,CpG_566,CpG_766	CpG_1222,CpG_1223,CpG_1224,CpG_1518,CpG_1519,CpG_1520,CpG_1521,CpG_1539,CpG_1540,CpG_1541,CpG_1542,CpG_1543,CpG_1595,CpG_1596,CpG_1597,CpG_1598,CpG_1599,CpG_1815,CpG_1816,CpG_1817,CpG_1818,CpG_1819,CpG_1820,CpG_1821,CpG_1822,CpG_1823,CpG_1824,CpG_1825,CpG_1826,CpG_1827,CpG_1828,CpG_1829,CpG_1830,CpG_1831,CpG_1856,CpG_1857,CpG_1858,CpG_1859,CpG_1860,CpG_1861,CpG_1862,CpG_1863,CpG_1864,CpG_1865,CpG…	Arf1,C1qtnf1,Calb2,Gata2,Nol3,Scara5,Sod1	Aco1,Apoe,Arf1,C1qtnf1,Calb2,Gata2,Mcur1,Nol3,Ptprc,Scara5,Sod1,Tacr1
GO Biological Process	GO:0045861	negative regulation of proteolysis	291	1.574957e-3	1.000000e+0	6.959037e-2	2.716231e+0	4.049729e+0	11	47	6.285714e-2	2.340426e-1	4	6	372	CpG_1433,CpG_1815,CpG_1816,CpG_1818,CpG_1820,CpG_1822,CpG_1824,CpG_1826,CpG_1828,CpG_27,CpG_566	CpG_1335,CpG_1336,CpG_1337,CpG_1338,CpG_1339,CpG_1340,CpG_1431,CpG_1432,CpG_1433,CpG_1434,CpG_1435,CpG_1436,CpG_1437,CpG_1438,CpG_1439,CpG_1815,CpG_1816,CpG_1817,CpG_1818,CpG_1819,CpG_1820,CpG_1821,CpG_1822,CpG_1823,CpG_1824,CpG_1825,CpG_1826,CpG_1827,CpG_1828,CpG_1829,CpG_1830,CpG_1831,CpG_27,CpG_28,CpG_29,CpG_30,CpG_564,CpG_565,CpG_566,CpG_810,CpG_811,CpG_812,CpG_813,CpG_814,CpG_815,CpG_816,CpG…	Dnajb2,Nol3,Pbk,Sirt4	Camk2n1,Dnajb2,Nol3,Pbk,Pi16,Sirt4
GO Biological Process	GO:0050953	sensory perception of light stimulus	291	1.574957e-3	1.000000e+0	6.959037e-2	2.716231e+0	4.049729e+0	11	47	6.285714e-2	2.340426e-1	3	6	144	CpG_1815,CpG_1816,CpG_1818,CpG_1820,CpG_1822,CpG_1824,CpG_1826,CpG_1828,CpG_222,CpG_548,CpG_550	CpG_1068,CpG_1069,CpG_1070,CpG_1071,CpG_1072,CpG_1073,CpG_1074,CpG_1075,CpG_1076,CpG_1421,CpG_1422,CpG_1423,CpG_1424,CpG_1425,CpG_1778,CpG_1779,CpG_1780,CpG_1781,CpG_1782,CpG_1783,CpG_1784,CpG_1815,CpG_1816,CpG_1817,CpG_1818,CpG_1819,CpG_1820,CpG_1821,CpG_1822,CpG_1823,CpG_1824,CpG_1825,CpG_1826,CpG_1827,CpG_1828,CpG_1829,CpG_1830,CpG_1831,CpG_218,CpG_219,CpG_220,CpG_221,CpG_222,CpG_223,CpG_548,C…	Hsf4,Opn4,Rcvrn	Cryba4,Dll4,Hsf4,Irx5,Opn4,Rcvrn
GO Biological Process	GO:0007601	visual perception	291	1.574957e-3	1.000000e+0	6.959037e-2	2.716231e+0	4.049729e+0	11	47	6.285714e-2	2.340426e-1	3	6	140	CpG_1815,CpG_1816,CpG_1818,CpG_1820,CpG_1822,CpG_1824,CpG_1826,CpG_1828,CpG_222,CpG_548,CpG_550	CpG_1068,CpG_1069,CpG_1070,CpG_1071,CpG_1072,CpG_1073,CpG_1074,CpG_1075,CpG_1076,CpG_1421,CpG_1422,CpG_1423,CpG_1424,CpG_1425,CpG_1778,CpG_1779,CpG_1780,CpG_1781,CpG_1782,CpG_1783,CpG_1784,CpG_1815,CpG_1816,CpG_1817,CpG_1818,CpG_1819,CpG_1820,CpG_1821,CpG_1822,CpG_1823,CpG_1824,CpG_1825,CpG_1826,CpG_1827,CpG_1828,CpG_1829,CpG_1830,CpG_1831,CpG_218,CpG_219,CpG_220,CpG_221,CpG_222,CpG_223,CpG_548,C…	Hsf4,Opn4,Rcvrn	Cryba4,Dll4,Hsf4,Irx5,Opn4,Rcvrn
GO Biological Process	GO:0016570	histone modification	294	1.588768e-3	1.000000e+0	6.948428e-2	2.210612e+0	7.237814e+0	16	84	9.142857e-2	1.904762e-1	6	10	360	CpG_1360,CpG_1815,CpG_1816,CpG_1818,CpG_1820,CpG_1822,CpG_1824,CpG_1826,CpG_1828,CpG_282,CpG_283,CpG_287,CpG_289,CpG_476,CpG_932,CpG_938	CpG_1354,CpG_1355,CpG_1356,CpG_1357,CpG_1358,CpG_1359,CpG_1360,CpG_1446,CpG_1447,CpG_1448,CpG_1449,CpG_1450,CpG_1451,CpG_1452,CpG_1815,CpG_1816,CpG_1817,CpG_1818,CpG_1819,CpG_1820,CpG_1821,CpG_1822,CpG_1823,CpG_1824,CpG_1825,CpG_1826,CpG_1827,CpG_1828,CpG_1829,CpG_1830,CpG_1831,CpG_280,CpG_281,CpG_282,CpG_283,CpG_284,CpG_285,CpG_286,CpG_287,CpG_288,CpG_289,CpG_290,CpG_291,CpG_292,CpG_363,CpG_364,…	Epop,Hsf4,Padi4,Padi6,Rcor1,Rps6ka4	Cbx8,Epop,Hsf4,Padi4,Padi6,Rcor1,Rps6ka4,Satb1,Setd1b,Vrk1
GO Biological Process	GO:0022603	regulation of anatomical structure morphogenesis	295	1.722449e-3	1.000000e+0	7.507542e-2	1.618327e+0	2.162728e+1	35	251	2.000000e-1	1.394422e-1	15	34	915	CpG_1471,CpG_1473,CpG_1475,CpG_1477,CpG_1478,CpG_1492,CpG_1493,CpG_1495,CpG_1496,CpG_1497,CpG_1539,CpG_1540,CpG_161,CpG_162,CpG_164,CpG_1660,CpG_1693,CpG_207,CpG_222,CpG_257,CpG_258,CpG_259,CpG_282,CpG_283,CpG_287,CpG_289,CpG_40,CpG_41,CpG_42,CpG_640,CpG_643,CpG_662,CpG_723,CpG_730,CpG_766	CpG_1029,CpG_1030,CpG_1031,CpG_1032,CpG_1033,CpG_1034,CpG_1035,CpG_1036,CpG_1037,CpG_1038,CpG_1039,CpG_1040,CpG_1041,CpG_1042,CpG_1043,CpG_1044,CpG_1045,CpG_1046,CpG_1047,CpG_1048,CpG_1049,CpG_1050,CpG_1051,CpG_1052,CpG_1056,CpG_1057,CpG_1058,CpG_1068,CpG_1069,CpG_1070,CpG_1071,CpG_1072,CpG_1073,CpG_1074,CpG_1075,CpG_1076,CpG_1217,CpG_1218,CpG_1220,CpG_136,CpG_137,CpG_138,CpG_139,CpG_140,CpG_141,…	Bcl11a,Etv5,Fbln1,Gas7,Gata2,Mkln1,Srcin1,Tbx2,Tgfb2,Tiam1,Ube3a,Wasf3,Wnt11,Wnt3a,Wnt7b	Apoe,Bcl11a,Bdnf,Ccbe1,Csf1,Dll4,Etv5,Fbln1,Fgf8,Fzd2,Gas7,Gata2,Gata6,Gli1,Hoxd11,Hoxd13,Hspb6,Mkln1,Nkx6-1,Plxna4,Rgma,Robo1,Srcin1,Tbx2,Tgfb2,Tiam1,Trpv2,Ube3a,Vrk1,Wasf3,Wnt11,Wnt2b,Wnt3a,Wnt7b
GO Biological Process	GO:0065005	protein-lipid complex assembly	296	1.749283e-3	1.000000e+0	7.598744e-2	3.692727e+0	1.895618e+0	7	22	4.000000e-2	3.181818e-1	3	4	22	CpG_207,CpG_80,CpG_82,CpG_890,CpG_891,CpG_892,CpG_894	CpG_1595,CpG_1596,CpG_1597,CpG_1598,CpG_1599,CpG_203,CpG_204,CpG_205,CpG_206,CpG_207,CpG_208,CpG_209,CpG_210,CpG_211,CpG_80,CpG_81,CpG_82,CpG_890,CpG_891,CpG_892,CpG_893,CpG_894	Abca7,Arf1,Bin1	Abca7,Apoe,Arf1,Bin1
GO Biological Process	GO:0090199	regulation of release of cytochrome c from mitochondria	297	1.790011e-3	1.000000e+0	7.749482e-2	3.315918e+0	2.412605e+0	8	28	4.571429e-2	2.857143e-1	1	3	46	CpG_1815,CpG_1816,CpG_1818,CpG_1820,CpG_1822,CpG_1824,CpG_1826,CpG_1828	CpG_1077,CpG_1078,CpG_1815,CpG_1816,CpG_1817,CpG_1818,CpG_1819,CpG_1820,CpG_1821,CpG_1822,CpG_1823,CpG_1824,CpG_1825,CpG_1826,CpG_1827,CpG_1828,CpG_1829,CpG_1830,CpG_1831,CpG_620,CpG_621,CpG_622,CpG_623,CpG_624,CpG_625,CpG_626,CpG_627,CpG_628	Nol3	Bcl2l11,Bik,Nol3
GO Biological Process	GO:0002931	response to ischemia	297	1.790011e-3	1.000000e+0	7.749482e-2	3.315918e+0	2.412605e+0	8	28	4.571429e-2	2.857143e-1	1	3	38	CpG_1815,CpG_1816,CpG_1818,CpG_1820,CpG_1822,CpG_1824,CpG_1826,CpG_1828	CpG_1815,CpG_1816,CpG_1817,CpG_1818,CpG_1819,CpG_1820,CpG_1821,CpG_1822,CpG_1823,CpG_1824,CpG_1825,CpG_1826,CpG_1827,CpG_1828,CpG_1829,CpG_1830,CpG_1831,CpG_767,CpG_768,CpG_769,CpG_770,CpG_771,CpG_775,CpG_776,CpG_777,CpG_778,CpG_779,CpG_780	Nol3	Arid1b,Nol3,Rcan1
GO Biological Process	GO:0072132	mesenchyme morphogenesis	297	1.790011e-3	1.000000e+0	7.749482e-2	3.315918e+0	2.412605e+0	8	28	4.571429e-2	2.857143e-1	4	5	48	CpG_1693,CpG_207,CpG_257,CpG_258,CpG_259,CpG_40,CpG_41,CpG_42	CpG_1688,CpG_1689,CpG_1690,CpG_1691,CpG_1692,CpG_1693,CpG_203,CpG_204,CpG_205,CpG_206,CpG_207,CpG_208,CpG_209,CpG_210,CpG_211,CpG_257,CpG_258,CpG_259,CpG_40,CpG_41,CpG_42,CpG_959,CpG_960,CpG_961,CpG_962,CpG_963,CpG_964,CpG_965	Tbx2,Tgfb2,Wnt11,Wnt3a	Fgf8,Tbx2,Tgfb2,Wnt11,Wnt3a
GO Biological Process	GO:0042063	gliogenesis	300	1.843279e-3	1.000000e+0	7.900294e-2	2.830662e+0	3.532742e+0	10	41	5.714286e-2	2.439024e-1	4	7	218	CpG_1471,CpG_1473,CpG_1475,CpG_1477,CpG_1478,CpG_1531,CpG_40,CpG_41,CpG_42,CpG_766	CpG_1415,CpG_1416,CpG_1417,CpG_1418,CpG_1419,CpG_1420,CpG_1471,CpG_1472,CpG_1473,CpG_1474,CpG_1475,CpG_1476,CpG_1477,CpG_1478,CpG_1522,CpG_1523,CpG_1524,CpG_1525,CpG_1526,CpG_1527,CpG_1528,CpG_1529,CpG_1530,CpG_1531,CpG_1532,CpG_1767,CpG_1768,CpG_40,CpG_41,CpG_42,CpG_450,CpG_451,CpG_452,CpG_453,CpG_454,CpG_455,CpG_456,CpG_763,CpG_764,CpG_765,CpG_766	Emx1,Sod1,Tgfb2,Wasf3	Emx1,Mpp5,Nfix,Nkx6-1,Sod1,Tgfb2,Wasf3
GO Biological Process	GO:1903827	regulation of cellular protein localization	301	2.286753e-3	1.000000e+0	9.768462e-2	2.028183e+0	8.874938e+0	18	103	1.028571e-1	1.747573e-1	8	16	573	CpG_1322,CpG_1433,CpG_1815,CpG_1816,CpG_1818,CpG_1820,CpG_1822,CpG_1824,CpG_1826,CpG_1828,CpG_2000,CpG_207,CpG_257,CpG_258,CpG_259,CpG_40,CpG_41,CpG_42	CpG_1222,CpG_1223,CpG_1224,CpG_1322,CpG_1323,CpG_1431,CpG_1432,CpG_1433,CpG_1434,CpG_1435,CpG_1436,CpG_1437,CpG_1438,CpG_1439,CpG_165,CpG_166,CpG_167,CpG_168,CpG_169,CpG_1694,CpG_1695,CpG_1696,CpG_1697,CpG_1698,CpG_1699,CpG_170,CpG_171,CpG_1773,CpG_1774,CpG_1775,CpG_1776,CpG_1777,CpG_1815,CpG_1816,CpG_1817,CpG_1818,CpG_1819,CpG_1820,CpG_1821,CpG_1822,CpG_1823,CpG_1824,CpG_1825,CpG_1826,CpG_1827,C…	Atpif1,Bcas3,Lyplal1,Nol3,Sirt4,Tgfb2,Wnt3a,Zic1	Atpif1,Axin2,Bcas3,Cyld,Ddx58,Kcne1,Lrrc15,Lyplal1,Nol3,Npm1,Numa1,Sec16b,Sirt4,Tgfb2,Wnt3a,Zic1
GO Biological Process	GO:0043122	regulation of I-kappaB kinase/NF-kappaB signaling	302	2.293075e-3	1.000000e+0	9.763033e-2	3.201576e+0	2.498769e+0	8	29	4.571429e-2	2.758621e-1	1	5	219	CpG_1815,CpG_1816,CpG_1818,CpG_1820,CpG_1822,CpG_1824,CpG_1826,CpG_1828	CpG_1726,CpG_1727,CpG_1728,CpG_1729,CpG_1773,CpG_1774,CpG_1775,CpG_1776,CpG_1777,CpG_1815,CpG_1816,CpG_1817,CpG_1818,CpG_1819,CpG_1820,CpG_1821,CpG_1822,CpG_1823,CpG_1824,CpG_1825,CpG_1826,CpG_1827,CpG_1828,CpG_1829,CpG_1830,CpG_1831,CpG_191,CpG_192,CpG_193	Nol3	Cyld,Nlrp6,Nod2,Nol3,Tnip1
GO Biological Process	GO:0016192	vesicle-mediated transport	303	2.481224e-3	1.000000e+0	1.052923e-1	1.797014e+0	1.335549e+1	24	155	1.371429e-1	1.548387e-1	14	31	983	CpG_1539,CpG_1540,CpG_1660,CpG_1693,CpG_207,CpG_235,CpG_257,CpG_258,CpG_259,CpG_282,CpG_283,CpG_287,CpG_289,CpG_484,CpG_566,CpG_80,CpG_82,CpG_890,CpG_891,CpG_892,CpG_894,CpG_927,CpG_949,CpG_953	CpG_1056,CpG_1057,CpG_1058,CpG_1138,CpG_1139,CpG_1140,CpG_1239,CpG_1240,CpG_1241,CpG_1242,CpG_1243,CpG_1453,CpG_1454,CpG_1455,CpG_1469,CpG_1470,CpG_1539,CpG_1540,CpG_1541,CpG_1542,CpG_1543,CpG_1593,CpG_1594,CpG_1595,CpG_1596,CpG_1597,CpG_1598,CpG_1599,CpG_1625,CpG_1626,CpG_1627,CpG_1628,CpG_1629,CpG_1630,CpG_1631,CpG_1632,CpG_1633,CpG_1634,CpG_1659,CpG_1660,CpG_1661,CpG_1662,CpG_1688,CpG_1689,CpG…	Abca7,Arf1,Bcas3,Bin1,Cd5,Doc2b,Gata2,Rph3al,Scara5,Scyl1,Srcin1,Tnfaip2,Ube3a,Uvrag	Abca7,Ankrd50,Apoe,Arf1,Bcas3,Bin1,Bloc1s3,Cd5,Doc2b,Exoc3l,Exoc3l2,Gata2,Gga1,Lin7c,Lman1,Lsr,Nr4a3,Rab3a,Rph3al,Scara5,Scarb1,Scyl1,Sec16b,Sh3bp1,Srcin1,Stard3,Stx1a,Tbc1d5,Tnfaip2,Ube3a,Uvrag
GO Biological Process	GO:0072507	divalent inorganic cation homeostasis	304	2.574236e-3	1.000000e+0	1.088800e-1	2.443308e+0	4.911374e+0	12	57	6.857143e-2	2.105263e-1	4	8	379	CpG_1539,CpG_1540,CpG_1815,CpG_1816,CpG_1818,CpG_1820,CpG_1822,CpG_1824,CpG_1826,CpG_1828,CpG_1866,CpG_358	CpG_1518,CpG_1519,CpG_1520,CpG_1521,CpG_1539,CpG_1540,CpG_1541,CpG_1542,CpG_1543,CpG_1595,CpG_1596,CpG_1597,CpG_1598,CpG_1599,CpG_1815,CpG_1816,CpG_1817,CpG_1818,CpG_1819,CpG_1820,CpG_1821,CpG_1822,CpG_1823,CpG_1824,CpG_1825,CpG_1826,CpG_1827,CpG_1828,CpG_1829,CpG_1830,CpG_1831,CpG_1856,CpG_1857,CpG_1858,CpG_1859,CpG_1860,CpG_1861,CpG_1862,CpG_1863,CpG_1864,CpG_1865,CpG_1866,CpG_1867,CpG_1868,CpG…	C1qtnf1,Calb2,Gata2,Nol3	Apoe,C1qtnf1,Calb2,Gata2,Mcur1,Nol3,Ptprc,Tacr1
GO Biological Process	GO:0072503	cellular divalent inorganic cation homeostasis	304	2.574236e-3	1.000000e+0	1.088800e-1	2.443308e+0	4.911374e+0	12	57	6.857143e-2	2.105263e-1	4	8	355	CpG_1539,CpG_1540,CpG_1815,CpG_1816,CpG_1818,CpG_1820,CpG_1822,CpG_1824,CpG_1826,CpG_1828,CpG_1866,CpG_358	CpG_1518,CpG_1519,CpG_1520,CpG_1521,CpG_1539,CpG_1540,CpG_1541,CpG_1542,CpG_1543,CpG_1595,CpG_1596,CpG_1597,CpG_1598,CpG_1599,CpG_1815,CpG_1816,CpG_1817,CpG_1818,CpG_1819,CpG_1820,CpG_1821,CpG_1822,CpG_1823,CpG_1824,CpG_1825,CpG_1826,CpG_1827,CpG_1828,CpG_1829,CpG_1830,CpG_1831,CpG_1856,CpG_1857,CpG_1858,CpG_1859,CpG_1860,CpG_1861,CpG_1862,CpG_1863,CpG_1864,CpG_1865,CpG_1866,CpG_1867,CpG_1868,CpG…	C1qtnf1,Calb2,Gata2,Nol3	Apoe,C1qtnf1,Calb2,Gata2,Mcur1,Nol3,Ptprc,Tacr1
GO Biological Process	GO:0006874	cellular calcium ion homeostasis	304	2.574236e-3	1.000000e+0	1.088800e-1	2.443308e+0	4.911374e+0	12	57	6.857143e-2	2.105263e-1	4	8	335	CpG_1539,CpG_1540,CpG_1815,CpG_1816,CpG_1818,CpG_1820,CpG_1822,CpG_1824,CpG_1826,CpG_1828,CpG_1866,CpG_358	CpG_1518,CpG_1519,CpG_1520,CpG_1521,CpG_1539,CpG_1540,CpG_1541,CpG_1542,CpG_1543,CpG_1595,CpG_1596,CpG_1597,CpG_1598,CpG_1599,CpG_1815,CpG_1816,CpG_1817,CpG_1818,CpG_1819,CpG_1820,CpG_1821,CpG_1822,CpG_1823,CpG_1824,CpG_1825,CpG_1826,CpG_1827,CpG_1828,CpG_1829,CpG_1830,CpG_1831,CpG_1856,CpG_1857,CpG_1858,CpG_1859,CpG_1860,CpG_1861,CpG_1862,CpG_1863,CpG_1864,CpG_1865,CpG_1866,CpG_1867,CpG_1868,CpG…	C1qtnf1,Calb2,Gata2,Nol3	Apoe,C1qtnf1,Calb2,Gata2,Mcur1,Nol3,Ptprc,Tacr1
GO Biological Process	GO:0055074	calcium ion homeostasis	304	2.574236e-3	1.000000e+0	1.088800e-1	2.443308e+0	4.911374e+0	12	57	6.857143e-2	2.105263e-1	4	8	349	CpG_1539,CpG_1540,CpG_1815,CpG_1816,CpG_1818,CpG_1820,CpG_1822,CpG_1824,CpG_1826,CpG_1828,CpG_1866,CpG_358	CpG_1518,CpG_1519,CpG_1520,CpG_1521,CpG_1539,CpG_1540,CpG_1541,CpG_1542,CpG_1543,CpG_1595,CpG_1596,CpG_1597,CpG_1598,CpG_1599,CpG_1815,CpG_1816,CpG_1817,CpG_1818,CpG_1819,CpG_1820,CpG_1821,CpG_1822,CpG_1823,CpG_1824,CpG_1825,CpG_1826,CpG_1827,CpG_1828,CpG_1829,CpG_1830,CpG_1831,CpG_1856,CpG_1857,CpG_1858,CpG_1859,CpG_1860,CpG_1861,CpG_1862,CpG_1863,CpG_1864,CpG_1865,CpG_1866,CpG_1867,CpG_1868,CpG…	C1qtnf1,Calb2,Gata2,Nol3	Apoe,C1qtnf1,Calb2,Gata2,Mcur1,Nol3,Ptprc,Tacr1
GO Biological Process	GO:0030308	negative regulation of cell growth	308	2.595193e-3	1.000000e+0	1.083409e-1	2.901429e+0	3.101920e+0	9	36	5.142857e-2	2.500000e-1	5	7	150	CpG_161,CpG_162,CpG_164,CpG_1693,CpG_207,CpG_27,CpG_40,CpG_41,CpG_42	CpG_161,CpG_162,CpG_163,CpG_164,CpG_1670,CpG_1671,CpG_1688,CpG_1689,CpG_1690,CpG_1691,CpG_1692,CpG_1693,CpG_203,CpG_204,CpG_205,CpG_206,CpG_207,CpG_208,CpG_209,CpG_210,CpG_211,CpG_27,CpG_28,CpG_29,CpG_30,CpG_40,CpG_41,CpG_42,CpG_810,CpG_811,CpG_812,CpG_813,CpG_814,CpG_815,CpG_816,CpG_817	Bcl11a,Dnajb2,Tgfb2,Wnt11,Wnt3a	Bcl11a,Dnajb2,Pi16,Rgma,Tgfb2,Wnt11,Wnt3a
GO Biological Process	GO:1904951	positive regulation of establishment of protein localization	309	2.616490e-3	1.000000e+0	1.088765e-1	2.055179e+0	8.271787e+0	17	96	9.714286e-2	1.770833e-1	8	15	491	CpG_2000,CpG_207,CpG_235,CpG_257,CpG_258,CpG_259,CpG_40,CpG_41,CpG_42,CpG_990,CpG_991,CpG_994,CpG_995,CpG_996,CpG_997,CpG_998,CpG_999	CpG_1222,CpG_1223,CpG_1224,CpG_1415,CpG_1416,CpG_1417,CpG_1418,CpG_1419,CpG_1420,CpG_1554,CpG_1555,CpG_1556,CpG_1557,CpG_1558,CpG_1559,CpG_1560,CpG_1561,CpG_1562,CpG_1563,CpG_1773,CpG_1774,CpG_1775,CpG_1776,CpG_1777,CpG_1941,CpG_1942,CpG_1943,CpG_1944,CpG_1945,CpG_1946,CpG_1947,CpG_1948,CpG_1949,CpG_1950,CpG_1951,CpG_1952,CpG_1953,CpG_1954,CpG_1955,CpG_1956,CpG_1957,CpG_1958,CpG_1959,CpG_1960,CpG…	Arf1,Bcas3,Doc2b,Phpt1,Rph3al,Tgfb2,Wnt3a,Zic1	Arf1,Bcas3,Cadm1,Ccr7,Ddx58,Doc2b,Il17ra,Nkx6-1,Nod2,Phpt1,Rph3al,Sec16b,Tgfb2,Wnt3a,Zic1
GO Biological Process	GO:0051222	positive regulation of protein transport	309	2.616490e-3	1.000000e+0	1.088765e-1	2.055179e+0	8.271787e+0	17	96	9.714286e-2	1.770833e-1	8	15	480	CpG_2000,CpG_207,CpG_235,CpG_257,CpG_258,CpG_259,CpG_40,CpG_41,CpG_42,CpG_990,CpG_991,CpG_994,CpG_995,CpG_996,CpG_997,CpG_998,CpG_999	CpG_1222,CpG_1223,CpG_1224,CpG_1415,CpG_1416,CpG_1417,CpG_1418,CpG_1419,CpG_1420,CpG_1554,CpG_1555,CpG_1556,CpG_1557,CpG_1558,CpG_1559,CpG_1560,CpG_1561,CpG_1562,CpG_1563,CpG_1773,CpG_1774,CpG_1775,CpG_1776,CpG_1777,CpG_1941,CpG_1942,CpG_1943,CpG_1944,CpG_1945,CpG_1946,CpG_1947,CpG_1948,CpG_1949,CpG_1950,CpG_1951,CpG_1952,CpG_1953,CpG_1954,CpG_1955,CpG_1956,CpG_1957,CpG_1958,CpG_1959,CpG_1960,CpG…	Arf1,Bcas3,Doc2b,Phpt1,Rph3al,Tgfb2,Wnt3a,Zic1	Arf1,Bcas3,Cadm1,Ccr7,Ddx58,Doc2b,Il17ra,Nkx6-1,Nod2,Phpt1,Rph3al,Sec16b,Tgfb2,Wnt3a,Zic1
GO Biological Process	GO:0007006	mitochondrial membrane organization	311	2.684507e-3	1.000000e+0	1.109884e-1	2.553257e+0	4.308223e+0	11	50	6.285714e-2	2.200000e-1	3	6	91	CpG_1014,CpG_1023,CpG_1322,CpG_1815,CpG_1816,CpG_1818,CpG_1820,CpG_1822,CpG_1824,CpG_1826,CpG_1828	CpG_1014,CpG_1015,CpG_1016,CpG_1017,CpG_1018,CpG_1019,CpG_1020,CpG_1021,CpG_1022,CpG_1023,CpG_1077,CpG_1078,CpG_1322,CpG_1323,CpG_1401,CpG_1402,CpG_1403,CpG_1404,CpG_1405,CpG_1406,CpG_1815,CpG_1816,CpG_1817,CpG_1818,CpG_1819,CpG_1820,CpG_1821,CpG_1822,CpG_1823,CpG_1824,CpG_1825,CpG_1826,CpG_1827,CpG_1828,CpG_1829,CpG_1830,CpG_1831,CpG_240,CpG_241,CpG_242,CpG_243,CpG_244,CpG_245,CpG_246,CpG_247,Cp…	Atpif1,Cstad,Nol3	Atpif1,Bcl2l11,Cstad,Nol3,Rhot1,Slc35f6
GO Biological Process	GO:0060100	positive regulation of phagocytosis, engulfment	312	2.830212e-3	1.000000e+0	1.166374e-1	5.802857e+0	6.893156e-1	4	8	2.285714e-2	5.000000e-1	2	2	9	CpG_1539,CpG_1540,CpG_80,CpG_82	CpG_1539,CpG_1540,CpG_1541,CpG_1542,CpG_1543,CpG_80,CpG_81,CpG_82	Abca7,Gata2	Abca7,Gata2
GO Biological Process	GO:1905153	regulation of membrane invagination	312	2.830212e-3	1.000000e+0	1.166374e-1	5.802857e+0	6.893156e-1	4	8	2.285714e-2	5.000000e-1	2	2	13	CpG_1539,CpG_1540,CpG_80,CpG_82	CpG_1539,CpG_1540,CpG_1541,CpG_1542,CpG_1543,CpG_80,CpG_81,CpG_82	Abca7,Gata2	Abca7,Gata2
GO Biological Process	GO:0060099	regulation of phagocytosis, engulfment	312	2.830212e-3	1.000000e+0	1.166374e-1	5.802857e+0	6.893156e-1	4	8	2.285714e-2	5.000000e-1	2	2	12	CpG_1539,CpG_1540,CpG_80,CpG_82	CpG_1539,CpG_1540,CpG_1541,CpG_1542,CpG_1543,CpG_80,CpG_81,CpG_82	Abca7,Gata2	Abca7,Gata2
GO Biological Process	GO:0051491	positive regulation of filopodium assembly	312	2.830212e-3	1.000000e+0	1.166374e-1	5.802857e+0	6.893156e-1	4	8	2.285714e-2	5.000000e-1	2	3	30	CpG_257,CpG_258,CpG_259,CpG_970	CpG_257,CpG_258,CpG_259,CpG_305,CpG_306,CpG_307,CpG_970,CpG_971	Bcas3,Neurl1a	Bcas3,Ccr7,Neurl1a
GO Biological Process	GO:0035265	organ growth	312	2.830212e-3	1.000000e+0	1.166374e-1	5.802857e+0	6.893156e-1	4	8	2.285714e-2	5.000000e-1	2	3	80	CpG_1660,CpG_40,CpG_41,CpG_42	CpG_1221,CpG_1659,CpG_1660,CpG_1661,CpG_1662,CpG_40,CpG_41,CpG_42	Tgfb2,Ube3a	Plag1,Tgfb2,Ube3a
GO Biological Process	GO:0051489	regulation of filopodium assembly	312	2.830212e-3	1.000000e+0	1.166374e-1	5.802857e+0	6.893156e-1	4	8	2.285714e-2	5.000000e-1	2	3	41	CpG_257,CpG_258,CpG_259,CpG_970	CpG_257,CpG_258,CpG_259,CpG_305,CpG_306,CpG_307,CpG_970,CpG_971	Bcas3,Neurl1a	Bcas3,Ccr7,Neurl1a
GO Biological Process	GO:0033157	regulation of intracellular protein transport	318	2.978503e-3	1.000000e+0	1.204327e-1	2.149206e+0	6.979321e+0	15	81	8.571429e-2	1.851852e-1	6	11	361	CpG_1322,CpG_1433,CpG_1815,CpG_1816,CpG_1818,CpG_1820,CpG_1822,CpG_1824,CpG_1826,CpG_1828,CpG_2000,CpG_207,CpG_257,CpG_258,CpG_259	CpG_1222,CpG_1223,CpG_1224,CpG_1322,CpG_1323,CpG_1431,CpG_1432,CpG_1433,CpG_1434,CpG_1435,CpG_1436,CpG_1437,CpG_1438,CpG_1439,CpG_1773,CpG_1774,CpG_1775,CpG_1776,CpG_1777,CpG_1815,CpG_1816,CpG_1817,CpG_1818,CpG_1819,CpG_1820,CpG_1821,CpG_1822,CpG_1823,CpG_1824,CpG_1825,CpG_1826,CpG_1827,CpG_1828,CpG_1829,CpG_1830,CpG_1831,CpG_2000,CpG_2001,CpG_2002,CpG_2003,CpG_2004,CpG_2005,CpG_2006,CpG_2007,CpG…	Atpif1,Bcas3,Nol3,Sirt4,Wnt3a,Zic1	Atpif1,Axin2,Bcas3,Cyld,Ddx58,Kcne1,Nol3,Sec16b,Sirt4,Wnt3a,Zic1
GO Biological Process	GO:0045936	negative regulation of phosphate metabolic process	319	2.979576e-3	1.000000e+0	1.200984e-1	2.086421e+0	7.668636e+0	16	89	9.142857e-2	1.797753e-1	6	15	573	CpG_147,CpG_148,CpG_149,CpG_1640,CpG_1641,CpG_1642,CpG_1644,CpG_282,CpG_283,CpG_287,CpG_289,CpG_40,CpG_41,CpG_42,CpG_566,CpG_640	CpG_1335,CpG_1336,CpG_1337,CpG_1338,CpG_1339,CpG_1340,CpG_147,CpG_148,CpG_149,CpG_1595,CpG_1596,CpG_1597,CpG_1598,CpG_1599,CpG_1640,CpG_1641,CpG_1642,CpG_1643,CpG_1644,CpG_165,CpG_166,CpG_167,CpG_168,CpG_169,CpG_170,CpG_1700,CpG_1701,CpG_1702,CpG_1703,CpG_1704,CpG_1705,CpG_171,CpG_1726,CpG_1727,CpG_1728,CpG_1729,CpG_191,CpG_192,CpG_193,CpG_269,CpG_270,CpG_271,CpG_272,CpG_273,CpG_274,CpG_275,CpG_2…	Fbln1,Pbk,Sfi1,Srcin1,Tgfb2,Tsks	Apoe,Camk2n1,Fbln1,Lrrc15,Nlrp6,Npm1,Pbk,Pibf1,Ptprc,Sfi1,Smpd1,Srcin1,Tgfb2,Tnip1,Tsks
GO Biological Process	GO:0044090	positive regulation of vacuole organization	320	3.259287e-3	1.000000e+0	1.309622e-1	4.463736e+0	1.120138e+0	5	13	2.857143e-2	3.846154e-1	2	2	18	CpG_184,CpG_983,CpG_985,CpG_986,CpG_987	CpG_184,CpG_185,CpG_186,CpG_187,CpG_188,CpG_189,CpG_983,CpG_984,CpG_985,CpG_986,CpG_987,CpG_988,CpG_989	Irgm1,Pip4k2a	Irgm1,Pip4k2a
GO Biological Process	GO:0045026	plasma membrane fusion	320	3.259287e-3	1.000000e+0	1.309622e-1	4.463736e+0	1.120138e+0	5	13	2.857143e-2	3.846154e-1	1	2	34	CpG_838,CpG_840,CpG_842,CpG_845,CpG_847	CpG_1469,CpG_1470,CpG_837,CpG_838,CpG_839,CpG_840,CpG_841,CpG_842,CpG_843,CpG_844,CpG_845,CpG_846,CpG_847	Mymx	Mymx,Stx1a
GO Biological Process	GO:0044088	regulation of vacuole organization	320	3.259287e-3	1.000000e+0	1.309622e-1	4.463736e+0	1.120138e+0	5	13	2.857143e-2	3.846154e-1	2	2	46	CpG_184,CpG_983,CpG_985,CpG_986,CpG_987	CpG_184,CpG_185,CpG_186,CpG_187,CpG_188,CpG_189,CpG_983,CpG_984,CpG_985,CpG_986,CpG_987,CpG_988,CpG_989	Irgm1,Pip4k2a	Irgm1,Pip4k2a
GO Biological Process	GO:0034249	negative regulation of cellular amide metabolic process	320	3.259287e-3	1.000000e+0	1.309622e-1	4.463736e+0	1.120138e+0	5	13	2.857143e-2	3.846154e-1	2	3	144	CpG_501,CpG_502,CpG_504,CpG_80,CpG_82	CpG_1595,CpG_1596,CpG_1597,CpG_1598,CpG_1599,CpG_500,CpG_501,CpG_502,CpG_503,CpG_504,CpG_80,CpG_81,CpG_82	Abca7,Dapk1	Abca7,Apoe,Dapk1
GO Biological Process	GO:0046395	carboxylic acid catabolic process	324	3.627524e-3	1.000000e+0	1.439590e-1	2.995023e+0	2.671098e+0	8	31	4.571429e-2	2.580645e-1	3	6	178	CpG_1307,CpG_1308,CpG_1309,CpG_1360,CpG_1640,CpG_1641,CpG_1642,CpG_1644	CpG_1307,CpG_1308,CpG_1309,CpG_1354,CpG_1355,CpG_1356,CpG_1357,CpG_1358,CpG_1359,CpG_1360,CpG_1640,CpG_1641,CpG_1642,CpG_1643,CpG_1644,CpG_1706,CpG_1707,CpG_1708,CpG_1709,CpG_486,CpG_487,CpG_529,CpG_530,CpG_531,CpG_532,CpG_533,CpG_534,CpG_535,CpG_536,CpG_537,CpG_538	Cpt1c,Faah,Padi4	Aldh5a1,Cpt1c,Faah,Hacl1,Padi4,Qprt
GO Biological Process	GO:1900180	regulation of protein localization to nucleus	325	3.695207e-3	1.000000e+0	1.461938e-1	2.251855e+0	5.773018e+0	13	67	7.428571e-2	1.940299e-1	4	8	213	CpG_1815,CpG_1816,CpG_1818,CpG_1820,CpG_1822,CpG_1824,CpG_1826,CpG_1828,CpG_2000,CpG_207,CpG_40,CpG_41,CpG_42	CpG_1222,CpG_1223,CpG_1224,CpG_165,CpG_166,CpG_167,CpG_168,CpG_169,CpG_170,CpG_171,CpG_1773,CpG_1774,CpG_1775,CpG_1776,CpG_1777,CpG_1815,CpG_1816,CpG_1817,CpG_1818,CpG_1819,CpG_1820,CpG_1821,CpG_1822,CpG_1823,CpG_1824,CpG_1825,CpG_1826,CpG_1827,CpG_1828,CpG_1829,CpG_1830,CpG_1831,CpG_2000,CpG_2001,CpG_2002,CpG_2003,CpG_2004,CpG_2005,CpG_2006,CpG_2007,CpG_2008,CpG_2009,CpG_2010,CpG_2011,CpG_203,Cp…	Nol3,Tgfb2,Wnt3a,Zic1	Axin2,Cyld,Ddx58,Nol3,Npm1,Tgfb2,Wnt3a,Zic1
GO Biological Process	GO:0010821	regulation of mitochondrion organization	326	3.868203e-3	1.000000e+0	1.525686e-1	2.579048e+0	3.877400e+0	10	45	5.714286e-2	2.222222e-1	3	6	206	CpG_1322,CpG_1433,CpG_1815,CpG_1816,CpG_1818,CpG_1820,CpG_1822,CpG_1824,CpG_1826,CpG_1828	CpG_1077,CpG_1078,CpG_1322,CpG_1323,CpG_1401,CpG_1402,CpG_1403,CpG_1404,CpG_1405,CpG_1406,CpG_1431,CpG_1432,CpG_1433,CpG_1434,CpG_1435,CpG_1436,CpG_1437,CpG_1438,CpG_1439,CpG_1815,CpG_1816,CpG_1817,CpG_1818,CpG_1819,CpG_1820,CpG_1821,CpG_1822,CpG_1823,CpG_1824,CpG_1825,CpG_1826,CpG_1827,CpG_1828,CpG_1829,CpG_1830,CpG_1831,CpG_620,CpG_621,CpG_622,CpG_623,CpG_624,CpG_625,CpG_626,CpG_627,CpG_628	Atpif1,Nol3,Sirt4	Atpif1,Bcl2l11,Bik,Nol3,Sirt4,Slc35f6
GO Biological Process	GO:0021782	glial cell development	327	3.938472e-3	1.000000e+0	1.548651e-1	3.664962e+0	1.637125e+0	6	19	3.428571e-2	3.157895e-1	2	3	97	CpG_1471,CpG_1473,CpG_1475,CpG_1477,CpG_1478,CpG_766	CpG_1471,CpG_1472,CpG_1473,CpG_1474,CpG_1475,CpG_1476,CpG_1477,CpG_1478,CpG_450,CpG_451,CpG_452,CpG_453,CpG_454,CpG_455,CpG_456,CpG_763,CpG_764,CpG_765,CpG_766	Sod1,Wasf3	Mpp5,Sod1,Wasf3
GO Biological Process	GO:0071825	protein-lipid complex subunit organization	328	3.946676e-3	1.000000e+0	1.547145e-1	3.249600e+0	2.154111e+0	7	25	4.000000e-2	2.800000e-1	3	5	36	CpG_207,CpG_80,CpG_82,CpG_890,CpG_891,CpG_892,CpG_894	CpG_1453,CpG_1454,CpG_1455,CpG_1595,CpG_1596,CpG_1597,CpG_1598,CpG_1599,CpG_203,CpG_204,CpG_205,CpG_206,CpG_207,CpG_208,CpG_209,CpG_210,CpG_211,CpG_80,CpG_81,CpG_82,CpG_890,CpG_891,CpG_892,CpG_893,CpG_894	Abca7,Arf1,Bin1	Abca7,Apoe,Arf1,Bin1,Scarb1
GO Biological Process	GO:0044801	single-organism membrane fusion	328	3.946676e-3	1.000000e+0	1.547145e-1	3.249600e+0	2.154111e+0	7	25	4.000000e-2	2.800000e-1	3	4	133	CpG_1693,CpG_235,CpG_838,CpG_840,CpG_842,CpG_845,CpG_847	CpG_1469,CpG_1470,CpG_1688,CpG_1689,CpG_1690,CpG_1691,CpG_1692,CpG_1693,CpG_234,CpG_235,CpG_236,CpG_237,CpG_238,CpG_239,CpG_837,CpG_838,CpG_839,CpG_840,CpG_841,CpG_842,CpG_843,CpG_844,CpG_845,CpG_846,CpG_847	Doc2b,Mymx,Uvrag	Doc2b,Mymx,Stx1a,Uvrag
GO Biological Process	GO:0061025	membrane fusion	328	3.946676e-3	1.000000e+0	1.547145e-1	3.249600e+0	2.154111e+0	7	25	4.000000e-2	2.800000e-1	3	4	155	CpG_1693,CpG_235,CpG_838,CpG_840,CpG_842,CpG_845,CpG_847	CpG_1469,CpG_1470,CpG_1688,CpG_1689,CpG_1690,CpG_1691,CpG_1692,CpG_1693,CpG_234,CpG_235,CpG_236,CpG_237,CpG_238,CpG_239,CpG_837,CpG_838,CpG_839,CpG_840,CpG_841,CpG_842,CpG_843,CpG_844,CpG_845,CpG_846,CpG_847	Doc2b,Mymx,Uvrag	Doc2b,Mymx,Stx1a,Uvrag
GO Biological Process	GO:2000145	regulation of cell motility	331	4.027588e-3	1.000000e+0	1.564554e-1	1.818806e+0	1.154604e+1	21	134	1.200000e-1	1.567164e-1	7	23	761	CpG_1693,CpG_257,CpG_258,CpG_259,CpG_282,CpG_283,CpG_287,CpG_289,CpG_40,CpG_41,CpG_42,CpG_640,CpG_766,CpG_990,CpG_991,CpG_994,CpG_995,CpG_996,CpG_997,CpG_998,CpG_999	CpG_1068,CpG_1069,CpG_1070,CpG_1071,CpG_1072,CpG_1073,CpG_1074,CpG_1075,CpG_1076,CpG_1220,CpG_1222,CpG_1223,CpG_1224,CpG_136,CpG_137,CpG_138,CpG_139,CpG_140,CpG_141,CpG_1415,CpG_1416,CpG_1417,CpG_1418,CpG_1419,CpG_142,CpG_1420,CpG_143,CpG_144,CpG_145,CpG_146,CpG_1518,CpG_1519,CpG_1520,CpG_1521,CpG_1595,CpG_1596,CpG_1597,CpG_1598,CpG_1599,CpG_1688,CpG_1689,CpG_1690,CpG_1691,CpG_1692,CpG_1693,CpG_1…	Bcas3,Fbln1,Phpt1,Srcin1,Tgfb2,Tiam1,Wnt11	Apoe,Bcas3,Ccbe1,Ccr7,Csf1,Ddx58,Dll4,Fbln1,Gli1,Lrch1,Lrrc15,Nkx6-1,Nod2,Phpt1,Ptprc,Robo1,Sh3bp1,Srcin1,Tacr1,Tgfb2,Tiam1,Wnt11,Zfp703
GO Biological Process	GO:0030036	actin cytoskeleton organization	332	4.045267e-3	1.000000e+0	1.566688e-1	2.321143e+0	5.169867e+0	12	60	6.857143e-2	2.000000e-1	4	9	417	CpG_1471,CpG_1473,CpG_1475,CpG_1477,CpG_1478,CpG_1492,CpG_1493,CpG_1495,CpG_1496,CpG_1497,CpG_207,CpG_222	CpG_1471,CpG_1472,CpG_1473,CpG_1474,CpG_1475,CpG_1476,CpG_1477,CpG_1478,CpG_1492,CpG_1493,CpG_1494,CpG_1495,CpG_1496,CpG_1497,CpG_1498,CpG_1499,CpG_1500,CpG_1501,CpG_1663,CpG_1664,CpG_1665,CpG_1666,CpG_1667,CpG_1668,CpG_1669,CpG_203,CpG_204,CpG_205,CpG_206,CpG_207,CpG_208,CpG_209,CpG_210,CpG_211,CpG_218,CpG_219,CpG_220,CpG_221,CpG_222,CpG_223,CpG_293,CpG_294,CpG_295,CpG_305,CpG_306,CpG_307,CpG_61…	Arf1,Gas7,Mkln1,Wasf3	Arf1,Ccr7,Gas7,Mef2a,Mkl2,Mkln1,Sh3bp1,Tcap,Wasf3
GO Biological Process	GO:0043010	camera-type eye development	333	4.093448e-3	1.000000e+0	1.580587e-1	1.972971e+0	8.616445e+0	17	100	9.714286e-2	1.700000e-1	5	13	332	CpG_1159,CpG_1160,CpG_1815,CpG_1816,CpG_1818,CpG_1820,CpG_1822,CpG_1824,CpG_1826,CpG_1828,CpG_255,CpG_257,CpG_258,CpG_259,CpG_40,CpG_41,CpG_42	CpG_1079,CpG_1080,CpG_1081,CpG_1082,CpG_115,CpG_1150,CpG_1151,CpG_1152,CpG_1153,CpG_1154,CpG_1155,CpG_1156,CpG_1157,CpG_1158,CpG_1159,CpG_116,CpG_1160,CpG_1161,CpG_1162,CpG_1163,CpG_1164,CpG_1165,CpG_1166,CpG_1167,CpG_1168,CpG_1169,CpG_117,CpG_1170,CpG_1171,CpG_1172,CpG_1173,CpG_1174,CpG_118,CpG_119,CpG_1421,CpG_1422,CpG_1423,CpG_1424,CpG_1425,CpG_1778,CpG_1779,CpG_1780,CpG_1781,CpG_1782,CpG_1783…	Hsf4,Mab21l1,Tbx2,Tgfb2,Unc45b	Cryba4,Foxl2,Hsf4,Irx5,Mab21l1,Mab21l2,Maf,Mdm1,Sdk2,Tbx2,Tgfb2,Unc45b,Xrn2
GO Biological Process	GO:1902108	regulation of mitochondrial membrane permeability involved in apoptotic process	334	4.487723e-3	1.000000e+0	1.727639e-1	2.901429e+0	2.757262e+0	8	32	4.571429e-2	2.500000e-1	1	3	20	CpG_1815,CpG_1816,CpG_1818,CpG_1820,CpG_1822,CpG_1824,CpG_1826,CpG_1828	CpG_1077,CpG_1078,CpG_1815,CpG_1816,CpG_1817,CpG_1818,CpG_1819,CpG_1820,CpG_1821,CpG_1822,CpG_1823,CpG_1824,CpG_1825,CpG_1826,CpG_1827,CpG_1828,CpG_1829,CpG_1830,CpG_1831,CpG_240,CpG_241,CpG_242,CpG_243,CpG_244,CpG_245,CpG_246,CpG_247,CpG_248,CpG_249,CpG_250,CpG_251,CpG_252	Nol3	Bcl2l11,Nol3,Rhot1
GO Biological Process	GO:0008380	RNA splicing	334	4.487723e-3	1.000000e+0	1.727639e-1	2.901429e+0	2.757262e+0	8	32	4.571429e-2	2.500000e-1	1	4	332	CpG_1815,CpG_1816,CpG_1818,CpG_1820,CpG_1822,CpG_1824,CpG_1826,CpG_1828	CpG_1549,CpG_1550,CpG_1551,CpG_1552,CpG_1553,CpG_1720,CpG_1721,CpG_1722,CpG_1723,CpG_1724,CpG_1725,CpG_1815,CpG_1816,CpG_1817,CpG_1818,CpG_1819,CpG_1820,CpG_1821,CpG_1822,CpG_1823,CpG_1824,CpG_1825,CpG_1826,CpG_1827,CpG_1828,CpG_1829,CpG_1830,CpG_1831,CpG_490,CpG_491,CpG_492,CpG_493	Nol3	Dhx32,Nol3,Prpf4b,Tsen2
GO Biological Process	GO:0022613	ribonucleoprotein complex biogenesis	336	4.580915e-3	1.000000e+0	1.753018e-1	2.522981e+0	3.963565e+0	10	46	5.714286e-2	2.173913e-1	2	6	398	CpG_1636,CpG_1637,CpG_1815,CpG_1816,CpG_1818,CpG_1820,CpG_1822,CpG_1824,CpG_1826,CpG_1828	CpG_1635,CpG_1636,CpG_1637,CpG_165,CpG_166,CpG_167,CpG_168,CpG_169,CpG_170,CpG_171,CpG_1815,CpG_1816,CpG_1817,CpG_1818,CpG_1819,CpG_1820,CpG_1821,CpG_1822,CpG_1823,CpG_1824,CpG_1825,CpG_1826,CpG_1827,CpG_1828,CpG_1829,CpG_1830,CpG_1831,CpG_338,CpG_339,CpG_340,CpG_341,CpG_342,CpG_343,CpG_344,CpG_582,CpG_583,CpG_584,CpG_585,CpG_586,CpG_587,CpG_588,CpG_897,CpG_898,CpG_899,CpG_900,CpG_901	Lsm14a,Nol3	Dis3,Lsm14a,Nol3,Npm1,Rpl38,Rps14
GO Biological Process	GO:0048709	oligodendrocyte differentiation	337	4.720764e-3	1.000000e+0	1.801175e-1	4.144898e+0	1.206302e+0	5	14	2.857143e-2	3.571429e-1	1	2	72	CpG_1471,CpG_1473,CpG_1475,CpG_1477,CpG_1478	CpG_1415,CpG_1416,CpG_1417,CpG_1418,CpG_1419,CpG_1420,CpG_1471,CpG_1472,CpG_1473,CpG_1474,CpG_1475,CpG_1476,CpG_1477,CpG_1478	Wasf3	Nkx6-1,Wasf3
GO Biological Process	GO:0002683	negative regulation of immune system process	338	4.871351e-3	1.000000e+0	1.853131e-1	2.110130e+0	6.634663e+0	14	77	8.000000e-2	1.818182e-1	4	15	429	CpG_1539,CpG_1540,CpG_262,CpG_40,CpG_41,CpG_42,CpG_990,CpG_991,CpG_994,CpG_995,CpG_996,CpG_997,CpG_998,CpG_999	CpG_1059,CpG_1060,CpG_1061,CpG_1062,CpG_1063,CpG_1064,CpG_1065,CpG_1066,CpG_1067,CpG_1122,CpG_1123,CpG_1124,CpG_1125,CpG_1126,CpG_1127,CpG_1128,CpG_1129,CpG_1130,CpG_1539,CpG_1540,CpG_1541,CpG_1542,CpG_1543,CpG_1549,CpG_1550,CpG_1551,CpG_1552,CpG_1553,CpG_1726,CpG_1727,CpG_1728,CpG_1729,CpG_1773,CpG_1774,CpG_1775,CpG_1776,CpG_1777,CpG_262,CpG_263,CpG_264,CpG_265,CpG_266,CpG_267,CpG_268,CpG_31,CpG…	Gata2,Phpt1,Tbx21,Tgfb2	Cyld,Gata2,Lrch1,Meis2,Nlrp6,Nod2,Pcbp2,Phpt1,Pibf1,Pparg,Ptprc,Sec14l1,Tbx21,Tgfb2,Zbtb46
GO Biological Process	GO:0016241	regulation of macroautophagy	339	5.230936e-3	1.000000e+0	1.984052e-1	3.481714e+0	1.723289e+0	6	20	3.428571e-2	3.000000e-1	3	4	95	CpG_1322,CpG_184,CpG_983,CpG_985,CpG_986,CpG_987	CpG_1322,CpG_1323,CpG_1773,CpG_1774,CpG_1775,CpG_1776,CpG_1777,CpG_184,CpG_185,CpG_186,CpG_187,CpG_188,CpG_189,CpG_983,CpG_984,CpG_985,CpG_986,CpG_987,CpG_988,CpG_989	Atpif1,Irgm1,Pip4k2a	Atpif1,Irgm1,Nod2,Pip4k2a
GO Biological Process	GO:0016239	positive regulation of macroautophagy	339	5.230936e-3	1.000000e+0	1.984052e-1	3.481714e+0	1.723289e+0	6	20	3.428571e-2	3.000000e-1	3	4	56	CpG_1322,CpG_184,CpG_983,CpG_985,CpG_986,CpG_987	CpG_1322,CpG_1323,CpG_1773,CpG_1774,CpG_1775,CpG_1776,CpG_1777,CpG_184,CpG_185,CpG_186,CpG_187,CpG_188,CpG_189,CpG_983,CpG_984,CpG_985,CpG_986,CpG_987,CpG_988,CpG_989	Atpif1,Irgm1,Pip4k2a	Atpif1,Irgm1,Nod2,Pip4k2a
GO Biological Process	GO:0030029	actin filament-based process	341	5.356498e-3	1.000000e+0	2.019761e-1	2.246267e+0	5.342196e+0	12	62	6.857143e-2	1.935484e-1	4	10	473	CpG_1471,CpG_1473,CpG_1475,CpG_1477,CpG_1478,CpG_1492,CpG_1493,CpG_1495,CpG_1496,CpG_1497,CpG_207,CpG_222	CpG_1471,CpG_1472,CpG_1473,CpG_1474,CpG_1475,CpG_1476,CpG_1477,CpG_1478,CpG_1492,CpG_1493,CpG_1494,CpG_1495,CpG_1496,CpG_1497,CpG_1498,CpG_1499,CpG_1500,CpG_1501,CpG_1663,CpG_1664,CpG_1665,CpG_1666,CpG_1667,CpG_1668,CpG_1669,CpG_203,CpG_204,CpG_205,CpG_206,CpG_207,CpG_208,CpG_209,CpG_210,CpG_211,CpG_218,CpG_219,CpG_220,CpG_221,CpG_222,CpG_223,CpG_293,CpG_294,CpG_295,CpG_305,CpG_306,CpG_307,CpG_61…	Arf1,Gas7,Mkln1,Wasf3	Arf1,Ccr7,Gas7,Kcnn2,Mef2a,Mkl2,Mkln1,Sh3bp1,Tcap,Wasf3
GO Biological Process	GO:0044089	positive regulation of cellular component biogenesis	342	5.487755e-3	1.000000e+0	2.063203e-1	2.155347e+0	6.031512e+0	13	70	7.428571e-2	1.857143e-1	5	15	451	CpG_1693,CpG_1840,CpG_1841,CpG_1842,CpG_1843,CpG_257,CpG_258,CpG_259,CpG_970,CpG_983,CpG_985,CpG_986,CpG_987	CpG_1056,CpG_1057,CpG_1058,CpG_1077,CpG_1078,CpG_1175,CpG_1176,CpG_1177,CpG_1178,CpG_1179,CpG_1302,CpG_1303,CpG_1304,CpG_1305,CpG_1306,CpG_1518,CpG_1519,CpG_1520,CpG_1521,CpG_1688,CpG_1689,CpG_1690,CpG_1691,CpG_1692,CpG_1693,CpG_1694,CpG_1695,CpG_1696,CpG_1697,CpG_1698,CpG_1699,CpG_1839,CpG_1840,CpG_1841,CpG_1842,CpG_1843,CpG_1844,CpG_1845,CpG_257,CpG_258,CpG_259,CpG_305,CpG_306,CpG_307,CpG_355,C…	Bcas3,Has3,Neurl1a,Pip4k2a,Wnt11	Bcas3,Bcl2l11,Bdnf,Bik,Ccr7,Has3,Lingo4,Neurl1a,Numa1,Pip4k2a,Sept9,Tacr1,Trabd2b,Wnt10b,Wnt11
GO Biological Process	GO:1900449	regulation of glutamate receptor signaling pathway	343	5.523084e-3	1.000000e+0	2.070432e-1	6.963429e+0	4.308223e-1	3	5	1.714286e-2	6.000000e-1	1	1	37	CpG_501,CpG_502,CpG_504	CpG_500,CpG_501,CpG_502,CpG_503,CpG_504	Dapk1	Dapk1
GO Biological Process	GO:1901216	positive regulation of neuron death	343	5.523084e-3	1.000000e+0	2.070432e-1	6.963429e+0	4.308223e-1	3	5	1.714286e-2	6.000000e-1	1	2	83	CpG_40,CpG_41,CpG_42	CpG_1077,CpG_1078,CpG_40,CpG_41,CpG_42	Tgfb2	Bcl2l11,Tgfb2
GO Biological Process	GO:2000310	regulation of N-methyl-D-aspartate selective glutamate receptor activity	343	5.523084e-3	1.000000e+0	2.070432e-1	6.963429e+0	4.308223e-1	3	5	1.714286e-2	6.000000e-1	1	1	16	CpG_501,CpG_502,CpG_504	CpG_500,CpG_501,CpG_502,CpG_503,CpG_504	Dapk1	Dapk1
GO Biological Process	GO:1902042	negative regulation of extrinsic apoptotic signaling pathway via death domain receptors	343	5.523084e-3	1.000000e+0	2.070432e-1	6.963429e+0	4.308223e-1	3	5	1.714286e-2	6.000000e-1	1	1	29	CpG_501,CpG_502,CpG_504	CpG_500,CpG_501,CpG_502,CpG_503,CpG_504	Dapk1	Dapk1
GO Biological Process	GO:0071447	cellular response to hydroperoxide	343	5.523084e-3	1.000000e+0	2.070432e-1	6.963429e+0	4.308223e-1	3	5	1.714286e-2	6.000000e-1	1	1	9	CpG_501,CpG_502,CpG_504	CpG_500,CpG_501,CpG_502,CpG_503,CpG_504	Dapk1	Dapk1
GO Biological Process	GO:0043525	positive regulation of neuron apoptotic process	343	5.523084e-3	1.000000e+0	2.070432e-1	6.963429e+0	4.308223e-1	3	5	1.714286e-2	6.000000e-1	1	2	55	CpG_40,CpG_41,CpG_42	CpG_1077,CpG_1078,CpG_40,CpG_41,CpG_42	Tgfb2	Bcl2l11,Tgfb2
GO Biological Process	GO:0017148	negative regulation of translation	343	5.523084e-3	1.000000e+0	2.070432e-1	6.963429e+0	4.308223e-1	3	5	1.714286e-2	6.000000e-1	1	1	131	CpG_501,CpG_502,CpG_504	CpG_500,CpG_501,CpG_502,CpG_503,CpG_504	Dapk1	Dapk1
GO Biological Process	GO:0008625	extrinsic apoptotic signaling pathway via death domain receptors	343	5.523084e-3	1.000000e+0	2.070432e-1	6.963429e+0	4.308223e-1	3	5	1.714286e-2	6.000000e-1	1	1	28	CpG_501,CpG_502,CpG_504	CpG_500,CpG_501,CpG_502,CpG_503,CpG_504	Dapk1	Dapk1
GO Biological Process	GO:0033194	response to hydroperoxide	343	5.523084e-3	1.000000e+0	2.070432e-1	6.963429e+0	4.308223e-1	3	5	1.714286e-2	6.000000e-1	1	1	18	CpG_501,CpG_502,CpG_504	CpG_500,CpG_501,CpG_502,CpG_503,CpG_504	Dapk1	Dapk1
GO Biological Process	GO:0070838	divalent metal ion transport	352	5.572038e-3	1.000000e+0	2.035377e-1	2.611286e+0	3.446578e+0	9	40	5.142857e-2	2.250000e-1	2	5	274	CpG_1815,CpG_1816,CpG_1818,CpG_1820,CpG_1822,CpG_1824,CpG_1826,CpG_1828,CpG_207	CpG_1815,CpG_1816,CpG_1817,CpG_1818,CpG_1819,CpG_1820,CpG_1821,CpG_1822,CpG_1823,CpG_1824,CpG_1825,CpG_1826,CpG_1827,CpG_1828,CpG_1829,CpG_1830,CpG_1831,CpG_203,CpG_204,CpG_205,CpG_206,CpG_207,CpG_208,CpG_209,CpG_210,CpG_211,CpG_212,CpG_213,CpG_214,CpG_215,CpG_216,CpG_217,CpG_31,CpG_32,CpG_33,CpG_34,CpG_494,CpG_495,CpG_496,CpG_497	Nol3,Wnt3a	Mcur1,Nol3,Ptprc,Trpv2,Wnt3a
GO Biological Process	GO:0090559	regulation of membrane permeability	352	5.572038e-3	1.000000e+0	2.035377e-1	2.611286e+0	3.446578e+0	9	40	5.142857e-2	2.250000e-1	2	5	60	CpG_1322,CpG_1815,CpG_1816,CpG_1818,CpG_1820,CpG_1822,CpG_1824,CpG_1826,CpG_1828	CpG_1077,CpG_1078,CpG_1322,CpG_1323,CpG_1401,CpG_1402,CpG_1403,CpG_1404,CpG_1405,CpG_1406,CpG_1815,CpG_1816,CpG_1817,CpG_1818,CpG_1819,CpG_1820,CpG_1821,CpG_1822,CpG_1823,CpG_1824,CpG_1825,CpG_1826,CpG_1827,CpG_1828,CpG_1829,CpG_1830,CpG_1831,CpG_240,CpG_241,CpG_242,CpG_243,CpG_244,CpG_245,CpG_246,CpG_247,CpG_248,CpG_249,CpG_250,CpG_251,CpG_252	Atpif1,Nol3	Atpif1,Bcl2l11,Nol3,Rhot1,Slc35f6
GO Biological Process	GO:0072511	divalent inorganic cation transport	352	5.572038e-3	1.000000e+0	2.035377e-1	2.611286e+0	3.446578e+0	9	40	5.142857e-2	2.250000e-1	2	5	277	CpG_1815,CpG_1816,CpG_1818,CpG_1820,CpG_1822,CpG_1824,CpG_1826,CpG_1828,CpG_207	CpG_1815,CpG_1816,CpG_1817,CpG_1818,CpG_1819,CpG_1820,CpG_1821,CpG_1822,CpG_1823,CpG_1824,CpG_1825,CpG_1826,CpG_1827,CpG_1828,CpG_1829,CpG_1830,CpG_1831,CpG_203,CpG_204,CpG_205,CpG_206,CpG_207,CpG_208,CpG_209,CpG_210,CpG_211,CpG_212,CpG_213,CpG_214,CpG_215,CpG_216,CpG_217,CpG_31,CpG_32,CpG_33,CpG_34,CpG_494,CpG_495,CpG_496,CpG_497	Nol3,Wnt3a	Mcur1,Nol3,Ptprc,Trpv2,Wnt3a
GO Biological Process	GO:0070588	calcium ion transmembrane transport	352	5.572038e-3	1.000000e+0	2.035377e-1	2.611286e+0	3.446578e+0	9	40	5.142857e-2	2.250000e-1	2	5	169	CpG_1815,CpG_1816,CpG_1818,CpG_1820,CpG_1822,CpG_1824,CpG_1826,CpG_1828,CpG_207	CpG_1815,CpG_1816,CpG_1817,CpG_1818,CpG_1819,CpG_1820,CpG_1821,CpG_1822,CpG_1823,CpG_1824,CpG_1825,CpG_1826,CpG_1827,CpG_1828,CpG_1829,CpG_1830,CpG_1831,CpG_203,CpG_204,CpG_205,CpG_206,CpG_207,CpG_208,CpG_209,CpG_210,CpG_211,CpG_212,CpG_213,CpG_214,CpG_215,CpG_216,CpG_217,CpG_31,CpG_32,CpG_33,CpG_34,CpG_494,CpG_495,CpG_496,CpG_497	Nol3,Wnt3a	Mcur1,Nol3,Ptprc,Trpv2,Wnt3a
GO Biological Process	GO:0006816	calcium ion transport	352	5.572038e-3	1.000000e+0	2.035377e-1	2.611286e+0	3.446578e+0	9	40	5.142857e-2	2.250000e-1	2	5	224	CpG_1815,CpG_1816,CpG_1818,CpG_1820,CpG_1822,CpG_1824,CpG_1826,CpG_1828,CpG_207	CpG_1815,CpG_1816,CpG_1817,CpG_1818,CpG_1819,CpG_1820,CpG_1821,CpG_1822,CpG_1823,CpG_1824,CpG_1825,CpG_1826,CpG_1827,CpG_1828,CpG_1829,CpG_1830,CpG_1831,CpG_203,CpG_204,CpG_205,CpG_206,CpG_207,CpG_208,CpG_209,CpG_210,CpG_211,CpG_212,CpG_213,CpG_214,CpG_215,CpG_216,CpG_217,CpG_31,CpG_32,CpG_33,CpG_34,CpG_494,CpG_495,CpG_496,CpG_497	Nol3,Wnt3a	Mcur1,Nol3,Ptprc,Trpv2,Wnt3a
GO Biological Process	GO:0030100	regulation of endocytosis	352	5.572038e-3	1.000000e+0	2.035377e-1	2.611286e+0	3.446578e+0	9	40	5.142857e-2	2.250000e-1	5	10	215	CpG_1539,CpG_1540,CpG_207,CpG_80,CpG_82,CpG_890,CpG_891,CpG_892,CpG_894	CpG_1453,CpG_1454,CpG_1455,CpG_1539,CpG_1540,CpG_1541,CpG_1542,CpG_1543,CpG_1595,CpG_1596,CpG_1597,CpG_1598,CpG_1599,CpG_1773,CpG_1774,CpG_1775,CpG_1776,CpG_1777,CpG_203,CpG_204,CpG_205,CpG_206,CpG_207,CpG_208,CpG_209,CpG_210,CpG_211,CpG_305,CpG_306,CpG_307,CpG_80,CpG_81,CpG_82,CpG_856,CpG_857,CpG_890,CpG_891,CpG_892,CpG_893,CpG_894	Abca7,Arf1,Bin1,Gata2,Wnt3a	Abca7,Apoe,Arf1,Bin1,Ccr7,Gata2,Nod2,Scarb1,Tbc1d5,Wnt3a
GO Biological Process	GO:0046902	regulation of mitochondrial membrane permeability	352	5.572038e-3	1.000000e+0	2.035377e-1	2.611286e+0	3.446578e+0	9	40	5.142857e-2	2.250000e-1	2	5	53	CpG_1322,CpG_1815,CpG_1816,CpG_1818,CpG_1820,CpG_1822,CpG_1824,CpG_1826,CpG_1828	CpG_1077,CpG_1078,CpG_1322,CpG_1323,CpG_1401,CpG_1402,CpG_1403,CpG_1404,CpG_1405,CpG_1406,CpG_1815,CpG_1816,CpG_1817,CpG_1818,CpG_1819,CpG_1820,CpG_1821,CpG_1822,CpG_1823,CpG_1824,CpG_1825,CpG_1826,CpG_1827,CpG_1828,CpG_1829,CpG_1830,CpG_1831,CpG_240,CpG_241,CpG_242,CpG_243,CpG_244,CpG_245,CpG_246,CpG_247,CpG_248,CpG_249,CpG_250,CpG_251,CpG_252	Atpif1,Nol3	Atpif1,Bcl2l11,Nol3,Rhot1,Slc35f6
GO Biological Process	GO:0030097	hemopoiesis	359	6.067077e-3	1.000000e+0	2.172994e-1	1.822385e+0	1.042590e+1	19	121	1.085714e-1	1.570248e-1	11	25	629	CpG_1284,CpG_1322,CpG_1539,CpG_1540,CpG_161,CpG_162,CpG_164,CpG_207,CpG_262,CpG_40,CpG_41,CpG_42,CpG_476,CpG_84,CpG_970,CpG_983,CpG_985,CpG_986,CpG_987	CpG_1068,CpG_1069,CpG_1070,CpG_1071,CpG_1072,CpG_1073,CpG_1074,CpG_1075,CpG_1076,CpG_1083,CpG_1084,CpG_1085,CpG_1086,CpG_1087,CpG_1088,CpG_1089,CpG_1090,CpG_1091,CpG_1092,CpG_1093,CpG_1094,CpG_1095,CpG_1096,CpG_1097,CpG_1098,CpG_1131,CpG_1132,CpG_1133,CpG_1134,CpG_1135,CpG_1136,CpG_1137,CpG_1217,CpG_1218,CpG_1220,CpG_1284,CpG_1285,CpG_1286,CpG_1287,CpG_1288,CpG_1322,CpG_1323,CpG_1539,CpG_1540,CpG…	Atpif1,Bcl11a,Efna2,Gata2,Ifna13,Pip4k2a,Rcor1,Sh3pxd2a,Tbx21,Tgfb2,Wnt3a	Atpif1,Bcl11a,Ccr7,Chd2,Csf1,Cyld,Dll4,Efna2,Gata2,Ifna13,Pip4k2a,Pou2f2,Pparg,Ptprc,Rcor1,Rps14,Satb1,Sh3pxd2a,Stk4,Tbx21,Tgfb2,Tpd52,Wnt10b,Wnt2b,Wnt3a
GO Biological Process	GO:0046887	positive regulation of hormone secretion	360	6.314606e-3	1.000000e+0	2.255367e-1	2.417857e+0	4.135894e+0	10	48	5.714286e-2	2.083333e-1	3	6	119	CpG_235,CpG_358,CpG_990,CpG_991,CpG_994,CpG_995,CpG_996,CpG_997,CpG_998,CpG_999	CpG_1415,CpG_1416,CpG_1417,CpG_1418,CpG_1419,CpG_1420,CpG_1518,CpG_1519,CpG_1520,CpG_1521,CpG_2012,CpG_2013,CpG_2014,CpG_2015,CpG_2016,CpG_2017,CpG_2018,CpG_2019,CpG_2020,CpG_2021,CpG_2022,CpG_2023,CpG_2024,CpG_2025,CpG_2026,CpG_2027,CpG_2028,CpG_234,CpG_235,CpG_236,CpG_237,CpG_238,CpG_239,CpG_358,CpG_359,CpG_360,CpG_361,CpG_362,CpG_990,CpG_991,CpG_992,CpG_993,CpG_994,CpG_995,CpG_996,CpG_997,CpG_…	C1qtnf1,Doc2b,Phpt1	C1qtnf1,Doc2b,Foxl2,Nkx6-1,Phpt1,Tacr1
GO Biological Process	GO:0010665	regulation of cardiac muscle cell apoptotic process	361	6.620751e-3	1.000000e+0	2.358161e-1	2.547596e+0	3.532742e+0	9	41	5.142857e-2	2.195122e-1	2	4	28	CpG_1433,CpG_1815,CpG_1816,CpG_1818,CpG_1820,CpG_1822,CpG_1824,CpG_1826,CpG_1828	CpG_1431,CpG_1432,CpG_1433,CpG_1434,CpG_1435,CpG_1436,CpG_1437,CpG_1438,CpG_1439,CpG_1617,CpG_1618,CpG_1619,CpG_1620,CpG_1621,CpG_1622,CpG_1623,CpG_1624,CpG_165,CpG_166,CpG_167,CpG_168,CpG_169,CpG_170,CpG_171,CpG_1815,CpG_1816,CpG_1817,CpG_1818,CpG_1819,CpG_1820,CpG_1821,CpG_1822,CpG_1823,CpG_1824,CpG_1825,CpG_1826,CpG_1827,CpG_1828,CpG_1829,CpG_1830,CpG_1831	Nol3,Sirt4	Hspb6,Nol3,Npm1,Sirt4
GO Biological Process	GO:0010667	negative regulation of cardiac muscle cell apoptotic process	361	6.620751e-3	1.000000e+0	2.358161e-1	2.547596e+0	3.532742e+0	9	41	5.142857e-2	2.195122e-1	2	4	17	CpG_1433,CpG_1815,CpG_1816,CpG_1818,CpG_1820,CpG_1822,CpG_1824,CpG_1826,CpG_1828	CpG_1431,CpG_1432,CpG_1433,CpG_1434,CpG_1435,CpG_1436,CpG_1437,CpG_1438,CpG_1439,CpG_1617,CpG_1618,CpG_1619,CpG_1620,CpG_1621,CpG_1622,CpG_1623,CpG_1624,CpG_165,CpG_166,CpG_167,CpG_168,CpG_169,CpG_170,CpG_171,CpG_1815,CpG_1816,CpG_1817,CpG_1818,CpG_1819,CpG_1820,CpG_1821,CpG_1822,CpG_1823,CpG_1824,CpG_1825,CpG_1826,CpG_1827,CpG_1828,CpG_1829,CpG_1830,CpG_1831	Nol3,Sirt4	Hspb6,Nol3,Npm1,Sirt4
GO Biological Process	GO:0010664	negative regulation of striated muscle cell apoptotic process	361	6.620751e-3	1.000000e+0	2.358161e-1	2.547596e+0	3.532742e+0	9	41	5.142857e-2	2.195122e-1	2	4	19	CpG_1433,CpG_1815,CpG_1816,CpG_1818,CpG_1820,CpG_1822,CpG_1824,CpG_1826,CpG_1828	CpG_1431,CpG_1432,CpG_1433,CpG_1434,CpG_1435,CpG_1436,CpG_1437,CpG_1438,CpG_1439,CpG_1617,CpG_1618,CpG_1619,CpG_1620,CpG_1621,CpG_1622,CpG_1623,CpG_1624,CpG_165,CpG_166,CpG_167,CpG_168,CpG_169,CpG_170,CpG_171,CpG_1815,CpG_1816,CpG_1817,CpG_1818,CpG_1819,CpG_1820,CpG_1821,CpG_1822,CpG_1823,CpG_1824,CpG_1825,CpG_1826,CpG_1827,CpG_1828,CpG_1829,CpG_1830,CpG_1831	Nol3,Sirt4	Hspb6,Nol3,Npm1,Sirt4
GO Biological Process	GO:0010662	regulation of striated muscle cell apoptotic process	361	6.620751e-3	1.000000e+0	2.358161e-1	2.547596e+0	3.532742e+0	9	41	5.142857e-2	2.195122e-1	2	4	29	CpG_1433,CpG_1815,CpG_1816,CpG_1818,CpG_1820,CpG_1822,CpG_1824,CpG_1826,CpG_1828	CpG_1431,CpG_1432,CpG_1433,CpG_1434,CpG_1435,CpG_1436,CpG_1437,CpG_1438,CpG_1439,CpG_1617,CpG_1618,CpG_1619,CpG_1620,CpG_1621,CpG_1622,CpG_1623,CpG_1624,CpG_165,CpG_166,CpG_167,CpG_168,CpG_169,CpG_170,CpG_171,CpG_1815,CpG_1816,CpG_1817,CpG_1818,CpG_1819,CpG_1820,CpG_1821,CpG_1822,CpG_1823,CpG_1824,CpG_1825,CpG_1826,CpG_1827,CpG_1828,CpG_1829,CpG_1830,CpG_1831	Nol3,Sirt4	Hspb6,Nol3,Npm1,Sirt4
GO Biological Process	GO:0010656	negative regulation of muscle cell apoptotic process	361	6.620751e-3	1.000000e+0	2.358161e-1	2.547596e+0	3.532742e+0	9	41	5.142857e-2	2.195122e-1	2	4	30	CpG_1433,CpG_1815,CpG_1816,CpG_1818,CpG_1820,CpG_1822,CpG_1824,CpG_1826,CpG_1828	CpG_1431,CpG_1432,CpG_1433,CpG_1434,CpG_1435,CpG_1436,CpG_1437,CpG_1438,CpG_1439,CpG_1617,CpG_1618,CpG_1619,CpG_1620,CpG_1621,CpG_1622,CpG_1623,CpG_1624,CpG_165,CpG_166,CpG_167,CpG_168,CpG_169,CpG_170,CpG_171,CpG_1815,CpG_1816,CpG_1817,CpG_1818,CpG_1819,CpG_1820,CpG_1821,CpG_1822,CpG_1823,CpG_1824,CpG_1825,CpG_1826,CpG_1827,CpG_1828,CpG_1829,CpG_1830,CpG_1831	Nol3,Sirt4	Hspb6,Nol3,Npm1,Sirt4
GO Biological Process	GO:0010660	regulation of muscle cell apoptotic process	361	6.620751e-3	1.000000e+0	2.358161e-1	2.547596e+0	3.532742e+0	9	41	5.142857e-2	2.195122e-1	2	4	50	CpG_1433,CpG_1815,CpG_1816,CpG_1818,CpG_1820,CpG_1822,CpG_1824,CpG_1826,CpG_1828	CpG_1431,CpG_1432,CpG_1433,CpG_1434,CpG_1435,CpG_1436,CpG_1437,CpG_1438,CpG_1439,CpG_1617,CpG_1618,CpG_1619,CpG_1620,CpG_1621,CpG_1622,CpG_1623,CpG_1624,CpG_165,CpG_166,CpG_167,CpG_168,CpG_169,CpG_170,CpG_171,CpG_1815,CpG_1816,CpG_1817,CpG_1818,CpG_1819,CpG_1820,CpG_1821,CpG_1822,CpG_1823,CpG_1824,CpG_1825,CpG_1826,CpG_1827,CpG_1828,CpG_1829,CpG_1830,CpG_1831	Nol3,Sirt4	Hspb6,Nol3,Npm1,Sirt4
GO Biological Process	GO:0050708	regulation of protein secretion	367	6.753796e-3	1.000000e+0	2.366221e-1	1.978247e+0	7.582472e+0	15	88	8.571429e-2	1.704545e-1	7	13	399	CpG_1433,CpG_207,CpG_235,CpG_40,CpG_41,CpG_42,CpG_640,CpG_990,CpG_991,CpG_994,CpG_995,CpG_996,CpG_997,CpG_998,CpG_999	CpG_1222,CpG_1223,CpG_1224,CpG_1415,CpG_1416,CpG_1417,CpG_1418,CpG_1419,CpG_1420,CpG_1431,CpG_1432,CpG_1433,CpG_1434,CpG_1435,CpG_1436,CpG_1437,CpG_1438,CpG_1439,CpG_1554,CpG_1555,CpG_1556,CpG_1557,CpG_1558,CpG_1559,CpG_1560,CpG_1561,CpG_1562,CpG_1563,CpG_1773,CpG_1774,CpG_1775,CpG_1776,CpG_1777,CpG_1941,CpG_1942,CpG_1943,CpG_1944,CpG_1945,CpG_1946,CpG_1947,CpG_1948,CpG_1949,CpG_1950,CpG_1951,CpG…	Arf1,Doc2b,Fbln1,Phpt1,Rph3al,Sirt4,Tgfb2	Arf1,Cadm1,Ccr7,Ddx58,Doc2b,Fbln1,Il17ra,Nkx6-1,Nod2,Phpt1,Rph3al,Sirt4,Tgfb2
GO Biological Process	GO:1902117	positive regulation of organelle assembly	368	7.396272e-3	1.000000e+0	2.584274e-1	4.642286e+0	8.616445e-1	4	10	2.285714e-2	4.000000e-1	1	2	62	CpG_983,CpG_985,CpG_986,CpG_987	CpG_355,CpG_356,CpG_357,CpG_983,CpG_984,CpG_985,CpG_986,CpG_987,CpG_988,CpG_989	Pip4k2a	Pip4k2a,Sept9
GO Biological Process	GO:2000171	negative regulation of dendrite development	368	7.396272e-3	1.000000e+0	2.584274e-1	4.642286e+0	8.616445e-1	4	10	2.285714e-2	4.000000e-1	2	3	28	CpG_161,CpG_162,CpG_164,CpG_1660	CpG_161,CpG_162,CpG_163,CpG_164,CpG_1659,CpG_1660,CpG_1661,CpG_1662,CpG_486,CpG_487	Bcl11a,Ube3a	Bcl11a,D130043K22Rik,Ube3a
GO Biological Process	GO:0002719	negative regulation of cytokine production involved in immune response	368	7.396272e-3	1.000000e+0	2.584274e-1	4.642286e+0	8.616445e-1	4	10	2.285714e-2	4.000000e-1	2	2	24	CpG_262,CpG_40,CpG_41,CpG_42	CpG_262,CpG_263,CpG_264,CpG_265,CpG_266,CpG_267,CpG_268,CpG_40,CpG_41,CpG_42	Tbx21,Tgfb2	Tbx21,Tgfb2
GO Biological Process	GO:0002701	negative regulation of production of molecular mediator of immune response	368	7.396272e-3	1.000000e+0	2.584274e-1	4.642286e+0	8.616445e-1	4	10	2.285714e-2	4.000000e-1	2	2	33	CpG_262,CpG_40,CpG_41,CpG_42	CpG_262,CpG_263,CpG_264,CpG_265,CpG_266,CpG_267,CpG_268,CpG_40,CpG_41,CpG_42	Tbx21,Tgfb2	Tbx21,Tgfb2
GO Biological Process	GO:0040012	regulation of locomotion	372	7.411777e-3	1.000000e+0	2.561845e-1	1.702171e+0	1.292467e+1	22	150	1.257143e-1	1.466667e-1	8	25	830	CpG_1693,CpG_207,CpG_257,CpG_258,CpG_259,CpG_282,CpG_283,CpG_287,CpG_289,CpG_40,CpG_41,CpG_42,CpG_640,CpG_766,CpG_990,CpG_991,CpG_994,CpG_995,CpG_996,CpG_997,CpG_998,CpG_999	CpG_1068,CpG_1069,CpG_1070,CpG_1071,CpG_1072,CpG_1073,CpG_1074,CpG_1075,CpG_1076,CpG_1220,CpG_1222,CpG_1223,CpG_1224,CpG_136,CpG_137,CpG_138,CpG_139,CpG_140,CpG_141,CpG_1415,CpG_1416,CpG_1417,CpG_1418,CpG_1419,CpG_142,CpG_1420,CpG_143,CpG_144,CpG_145,CpG_146,CpG_1502,CpG_1503,CpG_1504,CpG_1505,CpG_1506,CpG_1507,CpG_1508,CpG_1518,CpG_1519,CpG_1520,CpG_1521,CpG_1595,CpG_1596,CpG_1597,CpG_1598,CpG_1…	Bcas3,Fbln1,Phpt1,Srcin1,Tgfb2,Tiam1,Wnt11,Wnt3a	Apoe,Bcas3,Ccbe1,Ccr7,Csf1,Ddx58,Dll4,Fbln1,Gli1,Lrch1,Lrrc15,Nkx6-1,Nod2,Phpt1,Plxna4,Ptprc,Robo1,Sh3bp1,Srcin1,Tacr1,Tgfb2,Tiam1,Wnt11,Wnt3a,Zfp703
GO Biological Process	GO:0080135	regulation of cellular response to stress	373	7.767410e-3	1.000000e+0	2.677570e-1	2.005926e+0	6.979321e+0	14	81	8.000000e-2	1.728395e-1	5	14	562	CpG_1322,CpG_1815,CpG_1816,CpG_1818,CpG_1820,CpG_1822,CpG_1824,CpG_1826,CpG_1828,CpG_40,CpG_41,CpG_42,CpG_566,CpG_766	CpG_1239,CpG_1240,CpG_1241,CpG_1242,CpG_1243,CpG_1322,CpG_1323,CpG_165,CpG_166,CpG_167,CpG_1670,CpG_1671,CpG_168,CpG_169,CpG_170,CpG_171,CpG_1773,CpG_1774,CpG_1775,CpG_1776,CpG_1777,CpG_1815,CpG_1816,CpG_1817,CpG_1818,CpG_1819,CpG_1820,CpG_1821,CpG_1822,CpG_1823,CpG_1824,CpG_1825,CpG_1826,CpG_1827,CpG_1828,CpG_1829,CpG_1830,CpG_1831,CpG_305,CpG_306,CpG_307,CpG_327,CpG_328,CpG_329,CpG_330,CpG_331,…	Atpif1,Nol3,Pbk,Sod1,Tgfb2	Atpif1,Axin2,Cbx8,Ccr7,Ddx11,Map3k9,Nod2,Nol3,Npm1,Nr4a3,Pbk,Rgma,Sod1,Tgfb2
GO Biological Process	GO:0001558	regulation of cell growth	373	7.767410e-3	1.000000e+0	2.677570e-1	2.005926e+0	6.979321e+0	14	81	8.000000e-2	1.728395e-1	6	15	357	CpG_161,CpG_162,CpG_164,CpG_1693,CpG_207,CpG_27,CpG_40,CpG_41,CpG_42,CpG_861,CpG_862,CpG_863,CpG_864,CpG_865	CpG_1056,CpG_1057,CpG_1058,CpG_1415,CpG_1416,CpG_1417,CpG_1418,CpG_1419,CpG_1420,CpG_1502,CpG_1503,CpG_1504,CpG_1505,CpG_1506,CpG_1507,CpG_1508,CpG_1595,CpG_1596,CpG_1597,CpG_1598,CpG_1599,CpG_161,CpG_162,CpG_163,CpG_164,CpG_1670,CpG_1671,CpG_1688,CpG_1689,CpG_1690,CpG_1691,CpG_1692,CpG_1693,CpG_203,CpG_204,CpG_205,CpG_206,CpG_207,CpG_208,CpG_209,CpG_210,CpG_211,CpG_212,CpG_213,CpG_214,CpG_215,Cp…	Bcl11a,Dnajb2,Hdgfl2,Tgfb2,Wnt11,Wnt3a	Apoe,Bcl11a,Bdnf,Ddr1,Dnajb2,Hdgfl2,Igfbp6,Nkx6-1,Pi16,Plxna4,Rgma,Tgfb2,Trpv2,Wnt11,Wnt3a
GO Biological Process	GO:0016311	dephosphorylation	375	8.024877e-3	1.000000e+0	2.751570e-1	2.652735e+0	3.015756e+0	8	35	4.571429e-2	2.285714e-1	1	7	270	CpG_990,CpG_991,CpG_994,CpG_995,CpG_996,CpG_997,CpG_998,CpG_999	CpG_1217,CpG_1218,CpG_1219,CpG_1314,CpG_1315,CpG_1316,CpG_1317,CpG_1318,CpG_1319,CpG_1320,CpG_1321,CpG_1516,CpG_1517,CpG_31,CpG_32,CpG_33,CpG_34,CpG_567,CpG_568,CpG_614,CpG_615,CpG_616,CpG_617,CpG_618,CpG_619,CpG_990,CpG_991,CpG_992,CpG_993,CpG_994,CpG_995,CpG_996,CpG_997,CpG_998,CpG_999	Phpt1	Cttnbp2nl,Nt5c1a,Nt5c3,Phpt1,Ppp2r2a,Ptprc,Sh3bp1
GO Biological Process	GO:0050773	regulation of dendrite development	376	8.521535e-3	1.000000e+0	2.914093e-1	2.321143e+0	4.308223e+0	10	50	5.714286e-2	2.000000e-1	5	7	133	CpG_161,CpG_162,CpG_164,CpG_1660,CpG_207,CpG_282,CpG_283,CpG_287,CpG_289,CpG_970	CpG_1595,CpG_1596,CpG_1597,CpG_1598,CpG_1599,CpG_161,CpG_162,CpG_163,CpG_164,CpG_1659,CpG_1660,CpG_1661,CpG_1662,CpG_203,CpG_204,CpG_205,CpG_206,CpG_207,CpG_208,CpG_209,CpG_210,CpG_211,CpG_269,CpG_270,CpG_271,CpG_272,CpG_273,CpG_274,CpG_275,CpG_276,CpG_277,CpG_278,CpG_279,CpG_280,CpG_281,CpG_282,CpG_283,CpG_284,CpG_285,CpG_286,CpG_287,CpG_288,CpG_289,CpG_290,CpG_291,CpG_292,CpG_486,CpG_487,CpG_97…	Arf1,Bcl11a,Neurl1a,Srcin1,Ube3a	Apoe,Arf1,Bcl11a,D130043K22Rik,Neurl1a,Srcin1,Ube3a
GO Biological Process	GO:0051962	positive regulation of nervous system development	377	8.674322e-3	1.000000e+0	2.958473e-1	1.764069e+0	1.077056e+1	19	125	1.085714e-1	1.520000e-1	9	22	485	CpG_1471,CpG_1473,CpG_1475,CpG_1477,CpG_1478,CpG_1539,CpG_1540,CpG_161,CpG_162,CpG_164,CpG_207,CpG_723,CpG_730,CpG_766,CpG_890,CpG_891,CpG_892,CpG_894,CpG_970	CpG_1056,CpG_1057,CpG_1058,CpG_1175,CpG_1176,CpG_1177,CpG_1178,CpG_1179,CpG_1220,CpG_1221,CpG_136,CpG_137,CpG_138,CpG_139,CpG_140,CpG_141,CpG_1415,CpG_1416,CpG_1417,CpG_1418,CpG_1419,CpG_142,CpG_1420,CpG_143,CpG_144,CpG_145,CpG_146,CpG_1471,CpG_1472,CpG_1473,CpG_1474,CpG_1475,CpG_1476,CpG_1477,CpG_1478,CpG_1539,CpG_1540,CpG_1541,CpG_1542,CpG_1543,CpG_1595,CpG_1596,CpG_1597,CpG_1598,CpG_1599,CpG_1…	Arf1,Bcl11a,Bin1,Etv5,Gata2,Neurl1a,Tiam1,Wasf3,Wnt3a	Apoe,Arf1,Bcl11a,Bdnf,Bin1,Brinp2,Csf1,Etv5,Gata2,Gli1,Irx3,Lingo4,Neurl1a,Nkx6-1,Plag1,Rgma,Robo1,Tcf12,Tiam1,Trpv2,Wasf3,Wnt3a
GO Biological Process	GO:0014015	positive regulation of gliogenesis	378	8.706945e-3	1.000000e+0	2.961743e-1	3.165195e+0	1.895618e+0	6	22	3.428571e-2	2.727273e-1	2	5	47	CpG_723,CpG_730,CpG_890,CpG_891,CpG_892,CpG_894	CpG_1220,CpG_1221,CpG_1415,CpG_1416,CpG_1417,CpG_1418,CpG_1419,CpG_1420,CpG_722,CpG_723,CpG_724,CpG_725,CpG_726,CpG_727,CpG_728,CpG_729,CpG_730,CpG_890,CpG_891,CpG_892,CpG_893,CpG_894	Bin1,Etv5	Bin1,Csf1,Etv5,Nkx6-1,Plag1
GO Biological Process	GO:0035909	aorta morphogenesis	378	8.706945e-3	1.000000e+0	2.961743e-1	3.165195e+0	1.895618e+0	6	22	3.428571e-2	2.727273e-1	2	4	29	CpG_257,CpG_258,CpG_259,CpG_40,CpG_41,CpG_42	CpG_1068,CpG_1069,CpG_1070,CpG_1071,CpG_1072,CpG_1073,CpG_1074,CpG_1075,CpG_1076,CpG_257,CpG_258,CpG_259,CpG_40,CpG_41,CpG_42,CpG_959,CpG_960,CpG_961,CpG_962,CpG_963,CpG_964,CpG_965	Tbx2,Tgfb2	Dll4,Fgf8,Tbx2,Tgfb2
GO Biological Process	GO:0010771	negative regulation of cell morphogenesis involved in differentiation	378	8.706945e-3	1.000000e+0	2.961743e-1	3.165195e+0	1.895618e+0	6	22	3.428571e-2	2.727273e-1	4	5	74	CpG_161,CpG_162,CpG_164,CpG_1660,CpG_207,CpG_640	CpG_161,CpG_162,CpG_163,CpG_164,CpG_1659,CpG_1660,CpG_1661,CpG_1662,CpG_1670,CpG_1671,CpG_203,CpG_204,CpG_205,CpG_206,CpG_207,CpG_208,CpG_209,CpG_210,CpG_211,CpG_640,CpG_641,CpG_642	Bcl11a,Fbln1,Ube3a,Wnt3a	Bcl11a,Fbln1,Rgma,Ube3a,Wnt3a
GO Biological Process	GO:0071559	response to transforming growth factor beta	381	8.933871e-3	1.000000e+0	3.015006e-1	3.626786e+0	1.378631e+0	5	16	2.857143e-2	3.125000e-1	2	3	127	CpG_1846,CpG_1848,CpG_40,CpG_41,CpG_42	CpG_1412,CpG_1413,CpG_1414,CpG_1846,CpG_1847,CpG_1848,CpG_1849,CpG_1850,CpG_1851,CpG_1852,CpG_1853,CpG_1854,CpG_1855,CpG_40,CpG_41,CpG_42	Tgfb2,Zfhx3	Tgfb2,Yes1,Zfhx3
GO Biological Process	GO:0097722	sperm motility	382	1.034940e-2	1.000000e+0	3.483576e-1	5.802857e+0	5.169867e-1	3	6	1.714286e-2	5.000000e-1	2	2	87	CpG_21,CpG_22,CpG_970	CpG_19,CpG_20,CpG_21,CpG_22,CpG_970,CpG_971	Neurl1a,Tnp1	Neurl1a,Tnp1
GO Biological Process	GO:0071560	cellular response to transforming growth factor beta stimulus	382	1.034940e-2	1.000000e+0	3.483576e-1	5.802857e+0	5.169867e-1	3	6	1.714286e-2	5.000000e-1	1	2	124	CpG_40,CpG_41,CpG_42	CpG_1412,CpG_1413,CpG_1414,CpG_40,CpG_41,CpG_42	Tgfb2	Tgfb2,Yes1
GO Biological Process	GO:0048671	negative regulation of collateral sprouting	382	1.034940e-2	1.000000e+0	3.483576e-1	5.802857e+0	5.169867e-1	3	6	1.714286e-2	5.000000e-1	1	2	9	CpG_161,CpG_162,CpG_164	CpG_161,CpG_162,CpG_163,CpG_164,CpG_1670,CpG_1671	Bcl11a	Bcl11a,Rgma
GO Biological Process	GO:0030317	flagellated sperm motility	382	1.034940e-2	1.000000e+0	3.483576e-1	5.802857e+0	5.169867e-1	3	6	1.714286e-2	5.000000e-1	2	2	83	CpG_21,CpG_22,CpG_970	CpG_19,CpG_20,CpG_21,CpG_22,CpG_970,CpG_971	Neurl1a,Tnp1	Neurl1a,Tnp1
GO Biological Process	GO:0034260	negative regulation of GTPase activity	382	1.034940e-2	1.000000e+0	3.483576e-1	5.802857e+0	5.169867e-1	3	6	1.714286e-2	5.000000e-1	1	2	37	CpG_257,CpG_258,CpG_259	CpG_257,CpG_258,CpG_259,CpG_579,CpG_580,CpG_581	Bcas3	Bcas3,Lrch1
GO Biological Process	GO:0006839	mitochondrial transport	387	1.068963e-2	1.000000e+0	3.551609e-1	2.373896e+0	3.791236e+0	9	44	5.142857e-2	2.045455e-1	2	6	182	CpG_1322,CpG_1815,CpG_1816,CpG_1818,CpG_1820,CpG_1822,CpG_1824,CpG_1826,CpG_1828	CpG_1077,CpG_1078,CpG_1322,CpG_1323,CpG_1401,CpG_1402,CpG_1403,CpG_1404,CpG_1405,CpG_1406,CpG_1815,CpG_1816,CpG_1817,CpG_1818,CpG_1819,CpG_1820,CpG_1821,CpG_1822,CpG_1823,CpG_1824,CpG_1825,CpG_1826,CpG_1827,CpG_1828,CpG_1829,CpG_1830,CpG_1831,CpG_240,CpG_241,CpG_242,CpG_243,CpG_244,CpG_245,CpG_246,CpG_247,CpG_248,CpG_249,CpG_250,CpG_251,CpG_252,CpG_494,CpG_495,CpG_496,CpG_497	Atpif1,Nol3	Atpif1,Bcl2l11,Mcur1,Nol3,Rhot1,Slc35f6
GO Biological Process	GO:0045687	positive regulation of glial cell differentiation	388	1.085122e-2	1.000000e+0	3.596005e-1	4.220260e+0	9.478090e-1	4	11	2.285714e-2	3.636364e-1	1	2	31	CpG_890,CpG_891,CpG_892,CpG_894	CpG_1415,CpG_1416,CpG_1417,CpG_1418,CpG_1419,CpG_1420,CpG_890,CpG_891,CpG_892,CpG_893,CpG_894	Bin1	Bin1,Nkx6-1
GO Biological Process	GO:0030857	negative regulation of epithelial cell differentiation	388	1.085122e-2	1.000000e+0	3.596005e-1	4.220260e+0	9.478090e-1	4	11	2.285714e-2	3.636364e-1	2	3	40	CpG_40,CpG_41,CpG_42,CpG_851	CpG_1564,CpG_1565,CpG_1566,CpG_1567,CpG_1568,CpG_1569,CpG_40,CpG_41,CpG_42,CpG_851,CpG_852	Foxp4,Tgfb2	Foxp4,Gdf3,Tgfb2
GO Biological Process	GO:0045685	regulation of glial cell differentiation	388	1.085122e-2	1.000000e+0	3.596005e-1	4.220260e+0	9.478090e-1	4	11	2.285714e-2	3.636364e-1	1	2	58	CpG_890,CpG_891,CpG_892,CpG_894	CpG_1415,CpG_1416,CpG_1417,CpG_1418,CpG_1419,CpG_1420,CpG_890,CpG_891,CpG_892,CpG_893,CpG_894	Bin1	Bin1,Nkx6-1
GO Biological Process	GO:0050714	positive regulation of protein secretion	391	1.113535e-2	1.000000e+0	3.661850e-1	1.985188e+0	6.548498e+0	13	76	7.428571e-2	1.710526e-1	5	11	241	CpG_207,CpG_235,CpG_40,CpG_41,CpG_42,CpG_990,CpG_991,CpG_994,CpG_995,CpG_996,CpG_997,CpG_998,CpG_999	CpG_1222,CpG_1223,CpG_1224,CpG_1415,CpG_1416,CpG_1417,CpG_1418,CpG_1419,CpG_1420,CpG_1554,CpG_1555,CpG_1556,CpG_1557,CpG_1558,CpG_1559,CpG_1560,CpG_1561,CpG_1562,CpG_1563,CpG_1773,CpG_1774,CpG_1775,CpG_1776,CpG_1777,CpG_1941,CpG_1942,CpG_1943,CpG_1944,CpG_1945,CpG_1946,CpG_1947,CpG_1948,CpG_1949,CpG_1950,CpG_1951,CpG_1952,CpG_1953,CpG_1954,CpG_1955,CpG_1956,CpG_1957,CpG_1958,CpG_1959,CpG_1960,CpG…	Arf1,Doc2b,Phpt1,Rph3al,Tgfb2	Arf1,Cadm1,Ccr7,Ddx58,Doc2b,Il17ra,Nkx6-1,Nod2,Phpt1,Rph3al,Tgfb2
GO Biological Process	GO:0060761	negative regulation of response to cytokine stimulus	392	1.134081e-2	1.000000e+0	3.719901e-1	2.509344e+0	3.188085e+0	8	37	4.571429e-2	2.162162e-1	1	5	46	CpG_1815,CpG_1816,CpG_1818,CpG_1820,CpG_1822,CpG_1824,CpG_1826,CpG_1828	CpG_1180,CpG_1181,CpG_1182,CpG_1183,CpG_1184,CpG_1549,CpG_1550,CpG_1551,CpG_1552,CpG_1553,CpG_1815,CpG_1816,CpG_1817,CpG_1818,CpG_1819,CpG_1820,CpG_1821,CpG_1822,CpG_1823,CpG_1824,CpG_1825,CpG_1826,CpG_1827,CpG_1828,CpG_1829,CpG_1830,CpG_1831,CpG_31,CpG_32,CpG_33,CpG_34,CpG_754,CpG_755,CpG_756,CpG_757,CpG_758,CpG_759	Nol3	Hist2h2be,Nol3,Pparg,Ptprc,Robo1
GO Biological Process	GO:0043502	regulation of muscle adaptation	392	1.134081e-2	1.000000e+0	3.719901e-1	2.509344e+0	3.188085e+0	8	37	4.571429e-2	2.162162e-1	1	4	71	CpG_1815,CpG_1816,CpG_1818,CpG_1820,CpG_1822,CpG_1824,CpG_1826,CpG_1828	CpG_1239,CpG_1240,CpG_1241,CpG_1242,CpG_1243,CpG_1663,CpG_1664,CpG_1665,CpG_1666,CpG_1667,CpG_1668,CpG_1669,CpG_1815,CpG_1816,CpG_1817,CpG_1818,CpG_1819,CpG_1820,CpG_1821,CpG_1822,CpG_1823,CpG_1824,CpG_1825,CpG_1826,CpG_1827,CpG_1828,CpG_1829,CpG_1830,CpG_1831,CpG_810,CpG_811,CpG_812,CpG_813,CpG_814,CpG_815,CpG_816,CpG_817	Nol3	Mef2a,Nol3,Nr4a3,Pi16
GO Biological Process	GO:0001960	negative regulation of cytokine-mediated signaling pathway	392	1.134081e-2	1.000000e+0	3.719901e-1	2.509344e+0	3.188085e+0	8	37	4.571429e-2	2.162162e-1	1	5	42	CpG_1815,CpG_1816,CpG_1818,CpG_1820,CpG_1822,CpG_1824,CpG_1826,CpG_1828	CpG_1180,CpG_1181,CpG_1182,CpG_1183,CpG_1184,CpG_1549,CpG_1550,CpG_1551,CpG_1552,CpG_1553,CpG_1815,CpG_1816,CpG_1817,CpG_1818,CpG_1819,CpG_1820,CpG_1821,CpG_1822,CpG_1823,CpG_1824,CpG_1825,CpG_1826,CpG_1827,CpG_1828,CpG_1829,CpG_1830,CpG_1831,CpG_31,CpG_32,CpG_33,CpG_34,CpG_754,CpG_755,CpG_756,CpG_757,CpG_758,CpG_759	Nol3	Hist2h2be,Nol3,Pparg,Ptprc,Robo1
GO Biological Process	GO:0051348	negative regulation of transferase activity	395	1.140636e-2	1.000000e+0	3.712987e-1	2.048067e+0	5.859183e+0	12	68	6.857143e-2	1.764706e-1	2	8	285	CpG_282,CpG_283,CpG_287,CpG_289,CpG_990,CpG_991,CpG_994,CpG_995,CpG_996,CpG_997,CpG_998,CpG_999	CpG_1335,CpG_1336,CpG_1337,CpG_1338,CpG_1339,CpG_1340,CpG_1595,CpG_1596,CpG_1597,CpG_1598,CpG_1599,CpG_165,CpG_166,CpG_167,CpG_168,CpG_169,CpG_170,CpG_1700,CpG_1701,CpG_1702,CpG_1703,CpG_1704,CpG_1705,CpG_171,CpG_269,CpG_270,CpG_271,CpG_272,CpG_273,CpG_274,CpG_275,CpG_276,CpG_277,CpG_278,CpG_279,CpG_280,CpG_281,CpG_282,CpG_283,CpG_284,CpG_285,CpG_286,CpG_287,CpG_288,CpG_289,CpG_290,CpG_291,CpG_29…	Phpt1,Srcin1	Apoe,Camk2n1,Lrrc15,Npm1,Phpt1,Ptprc,Smpd1,Srcin1
GO Biological Process	GO:1902532	negative regulation of intracellular signal transduction	396	1.240772e-2	1.000000e+0	4.028749e-1	1.959406e+0	6.634663e+0	13	77	7.428571e-2	1.688312e-1	4	14	504	CpG_1815,CpG_1816,CpG_1818,CpG_1820,CpG_1822,CpG_1824,CpG_1826,CpG_1828,CpG_40,CpG_41,CpG_42,CpG_566,CpG_640	CpG_1335,CpG_1336,CpG_1337,CpG_1338,CpG_1339,CpG_1340,CpG_1595,CpG_1596,CpG_1597,CpG_1598,CpG_1599,CpG_1700,CpG_1701,CpG_1702,CpG_1703,CpG_1704,CpG_1705,CpG_1726,CpG_1727,CpG_1728,CpG_1729,CpG_1773,CpG_1774,CpG_1775,CpG_1776,CpG_1777,CpG_1815,CpG_1816,CpG_1817,CpG_1818,CpG_1819,CpG_1820,CpG_1821,CpG_1822,CpG_1823,CpG_1824,CpG_1825,CpG_1826,CpG_1827,CpG_1828,CpG_1829,CpG_1830,CpG_1831,CpG_191,CpG_…	Fbln1,Nol3,Pbk,Tgfb2	Apoe,Camk2n1,Cyld,Fbln1,Lrrc15,Nlrp6,Nol3,Pbk,Pibf1,Sec14l1,Sh3bp1,Smpd1,Tgfb2,Tnip1
GO Biological Process	GO:0070482	response to oxygen levels	396	1.240772e-2	1.000000e+0	4.028749e-1	1.959406e+0	6.634663e+0	13	77	7.428571e-2	1.688312e-1	4	8	298	CpG_1433,CpG_1815,CpG_1816,CpG_1818,CpG_1820,CpG_1822,CpG_1824,CpG_1826,CpG_1828,CpG_40,CpG_41,CpG_42,CpG_662	CpG_1114,CpG_1115,CpG_1116,CpG_1117,CpG_1118,CpG_1431,CpG_1432,CpG_1433,CpG_1434,CpG_1435,CpG_1436,CpG_1437,CpG_1438,CpG_1439,CpG_165,CpG_166,CpG_167,CpG_168,CpG_169,CpG_170,CpG_171,CpG_1815,CpG_1816,CpG_1817,CpG_1818,CpG_1819,CpG_1820,CpG_1821,CpG_1822,CpG_1823,CpG_1824,CpG_1825,CpG_1826,CpG_1827,CpG_1828,CpG_1829,CpG_1830,CpG_1831,CpG_40,CpG_41,CpG_42,CpG_645,CpG_646,CpG_647,CpG_648,CpG_649,CpG…	Nol3,Ppara,Sirt4,Tgfb2	Bach1,Gata6,Nol3,Npm1,Pck1,Ppara,Sirt4,Tgfb2
GO Biological Process	GO:0001666	response to hypoxia	396	1.240772e-2	1.000000e+0	4.028749e-1	1.959406e+0	6.634663e+0	13	77	7.428571e-2	1.688312e-1	4	8	270	CpG_1433,CpG_1815,CpG_1816,CpG_1818,CpG_1820,CpG_1822,CpG_1824,CpG_1826,CpG_1828,CpG_40,CpG_41,CpG_42,CpG_662	CpG_1114,CpG_1115,CpG_1116,CpG_1117,CpG_1118,CpG_1431,CpG_1432,CpG_1433,CpG_1434,CpG_1435,CpG_1436,CpG_1437,CpG_1438,CpG_1439,CpG_165,CpG_166,CpG_167,CpG_168,CpG_169,CpG_170,CpG_171,CpG_1815,CpG_1816,CpG_1817,CpG_1818,CpG_1819,CpG_1820,CpG_1821,CpG_1822,CpG_1823,CpG_1824,CpG_1825,CpG_1826,CpG_1827,CpG_1828,CpG_1829,CpG_1830,CpG_1831,CpG_40,CpG_41,CpG_42,CpG_645,CpG_646,CpG_647,CpG_648,CpG_649,CpG…	Nol3,Ppara,Sirt4,Tgfb2	Bach1,Gata6,Nol3,Npm1,Pck1,Ppara,Sirt4,Tgfb2
GO Biological Process	GO:0036293	response to decreased oxygen levels	396	1.240772e-2	1.000000e+0	4.028749e-1	1.959406e+0	6.634663e+0	13	77	7.428571e-2	1.688312e-1	4	8	278	CpG_1433,CpG_1815,CpG_1816,CpG_1818,CpG_1820,CpG_1822,CpG_1824,CpG_1826,CpG_1828,CpG_40,CpG_41,CpG_42,CpG_662	CpG_1114,CpG_1115,CpG_1116,CpG_1117,CpG_1118,CpG_1431,CpG_1432,CpG_1433,CpG_1434,CpG_1435,CpG_1436,CpG_1437,CpG_1438,CpG_1439,CpG_165,CpG_166,CpG_167,CpG_168,CpG_169,CpG_170,CpG_171,CpG_1815,CpG_1816,CpG_1817,CpG_1818,CpG_1819,CpG_1820,CpG_1821,CpG_1822,CpG_1823,CpG_1824,CpG_1825,CpG_1826,CpG_1827,CpG_1828,CpG_1829,CpG_1830,CpG_1831,CpG_40,CpG_41,CpG_42,CpG_645,CpG_646,CpG_647,CpG_648,CpG_649,CpG…	Nol3,Ppara,Sirt4,Tgfb2	Bach1,Gata6,Nol3,Npm1,Pck1,Ppara,Sirt4,Tgfb2
GO Biological Process	GO:0048878	chemical homeostasis	400	1.304267e-2	1.000000e+0	4.192566e-1	1.669887e+0	1.197686e+1	20	139	1.142857e-1	1.438849e-1	11	23	926	CpG_1539,CpG_1540,CpG_1815,CpG_1816,CpG_1818,CpG_1820,CpG_1822,CpG_1824,CpG_1826,CpG_1828,CpG_1866,CpG_207,CpG_235,CpG_27,CpG_315,CpG_358,CpG_566,CpG_643,CpG_662,CpG_766	CpG_1114,CpG_1115,CpG_1116,CpG_1117,CpG_1118,CpG_1222,CpG_1223,CpG_1224,CpG_1453,CpG_1454,CpG_1455,CpG_1458,CpG_1459,CpG_1460,CpG_1461,CpG_1462,CpG_1463,CpG_1464,CpG_1465,CpG_1466,CpG_1467,CpG_1468,CpG_1518,CpG_1519,CpG_1520,CpG_1521,CpG_1539,CpG_1540,CpG_1541,CpG_1542,CpG_1543,CpG_1549,CpG_1550,CpG_1551,CpG_1552,CpG_1553,CpG_1595,CpG_1596,CpG_1597,CpG_1598,CpG_1599,CpG_1815,CpG_1816,CpG_1817,CpG…	Arf1,C1qtnf1,Calb2,Gata2,Nol3,Ptprn,Rph3al,Scara5,Sod1,Wnk4,Wnt7b	Aco1,Adcy6,Apoe,Arf1,C1qtnf1,Calb2,Cldn4,Gata2,Mcur1,Ncor2,Nol3,Nr5a2,Pck1,Pparg,Ptprc,Ptprn,Rph3al,Scara5,Scarb1,Sod1,Tacr1,Wnk4,Wnt7b
GO Biological Process	GO:0044242	cellular lipid catabolic process	401	1.333487e-2	1.000000e+0	4.275804e-1	2.443308e+0	3.274249e+0	8	38	4.571429e-2	2.105263e-1	3	6	151	CpG_1307,CpG_1308,CpG_1309,CpG_1433,CpG_1640,CpG_1641,CpG_1642,CpG_1644	CpG_1307,CpG_1308,CpG_1309,CpG_1431,CpG_1432,CpG_1433,CpG_1434,CpG_1435,CpG_1436,CpG_1437,CpG_1438,CpG_1439,CpG_1595,CpG_1596,CpG_1597,CpG_1598,CpG_1599,CpG_1640,CpG_1641,CpG_1642,CpG_1643,CpG_1644,CpG_1700,CpG_1701,CpG_1702,CpG_1703,CpG_1704,CpG_1705,CpG_529,CpG_530,CpG_531,CpG_532,CpG_533,CpG_534,CpG_535,CpG_536,CpG_537,CpG_538	Cpt1c,Faah,Pla2g1b	Apoe,Cpt1c,Faah,Hacl1,Pla2g1b,Smpd1
GO Biological Process	GO:0060627	regulation of vesicle-mediated transport	402	1.451775e-2	1.000000e+0	4.643513e-1	1.867586e+0	7.496307e+0	14	87	8.000000e-2	1.609195e-1	9	18	458	CpG_1539,CpG_1540,CpG_1693,CpG_207,CpG_235,CpG_40,CpG_41,CpG_42,CpG_80,CpG_82,CpG_890,CpG_891,CpG_892,CpG_894	CpG_115,CpG_116,CpG_117,CpG_118,CpG_119,CpG_120,CpG_121,CpG_122,CpG_123,CpG_124,CpG_125,CpG_126,CpG_127,CpG_128,CpG_129,CpG_130,CpG_131,CpG_132,CpG_133,CpG_134,CpG_135,CpG_1453,CpG_1454,CpG_1455,CpG_1469,CpG_1470,CpG_1539,CpG_1540,CpG_1541,CpG_1542,CpG_1543,CpG_1595,CpG_1596,CpG_1597,CpG_1598,CpG_1599,CpG_1688,CpG_1689,CpG_1690,CpG_1691,CpG_1692,CpG_1693,CpG_1749,CpG_1750,CpG_1751,CpG_1752,CpG_17…	Abca7,Arf1,Bin1,Doc2b,Gata2,Lyplal1,Rph3al,Uvrag,Wnt3a	Abca7,Apoe,Arf1,Bin1,Ccr7,Doc2b,Gata2,Lyplal1,Nod2,Rab3a,Rap1b,Rph3al,Scarb1,Stx1a,Tbc1d30,Tbc1d5,Uvrag,Wnt3a
GO Biological Process	GO:0046883	regulation of hormone secretion	403	1.462658e-2	1.000000e+0	4.666714e-1	2.059078e+0	5.342196e+0	11	62	6.285714e-2	1.774194e-1	4	8	242	CpG_1433,CpG_235,CpG_358,CpG_990,CpG_991,CpG_994,CpG_995,CpG_996,CpG_997,CpG_998,CpG_999	CpG_1415,CpG_1416,CpG_1417,CpG_1418,CpG_1419,CpG_1420,CpG_1431,CpG_1432,CpG_1433,CpG_1434,CpG_1435,CpG_1436,CpG_1437,CpG_1438,CpG_1439,CpG_1518,CpG_1519,CpG_1520,CpG_1521,CpG_1549,CpG_1550,CpG_1551,CpG_1552,CpG_1553,CpG_2012,CpG_2013,CpG_2014,CpG_2015,CpG_2016,CpG_2017,CpG_2018,CpG_2019,CpG_2020,CpG_2021,CpG_2022,CpG_2023,CpG_2024,CpG_2025,CpG_2026,CpG_2027,CpG_2028,CpG_234,CpG_235,CpG_236,CpG_23…	C1qtnf1,Doc2b,Phpt1,Sirt4	C1qtnf1,Doc2b,Foxl2,Nkx6-1,Phpt1,Pparg,Sirt4,Tacr1
GO Biological Process	GO:0001959	regulation of cytokine-mediated signaling pathway	403	1.462658e-2	1.000000e+0	4.666714e-1	2.059078e+0	5.342196e+0	11	62	6.285714e-2	1.774194e-1	3	11	90	CpG_1636,CpG_1637,CpG_1815,CpG_1816,CpG_1818,CpG_1820,CpG_1822,CpG_1824,CpG_1826,CpG_1828,CpG_184	CpG_1114,CpG_1115,CpG_1116,CpG_1117,CpG_1118,CpG_1180,CpG_1181,CpG_1182,CpG_1183,CpG_1184,CpG_1220,CpG_1549,CpG_1550,CpG_1551,CpG_1552,CpG_1553,CpG_1635,CpG_1636,CpG_1637,CpG_1730,CpG_1731,CpG_1732,CpG_1733,CpG_1734,CpG_1773,CpG_1774,CpG_1775,CpG_1776,CpG_1777,CpG_1815,CpG_1816,CpG_1817,CpG_1818,CpG_1819,CpG_1820,CpG_1821,CpG_1822,CpG_1823,CpG_1824,CpG_1825,CpG_1826,CpG_1827,CpG_1828,CpG_1829,CpG…	Irgm1,Lsm14a,Nol3	Csf1,Cyld,Hist2h2be,Irf7,Irgm1,Lsm14a,Nol3,Pparg,Ptprc,Robo1,Zbp1
GO Biological Process	GO:0042693	muscle cell fate commitment	405	1.519962e-2	1.000000e+0	4.825598e-1	3.868571e+0	1.033973e+0	4	12	2.285714e-2	3.333333e-1	2	2	11	CpG_207,CpG_257,CpG_258,CpG_259	CpG_203,CpG_204,CpG_205,CpG_206,CpG_207,CpG_208,CpG_209,CpG_210,CpG_211,CpG_257,CpG_258,CpG_259	Tbx2,Wnt3a	Tbx2,Wnt3a
GO Biological Process	GO:0033692	cellular polysaccharide biosynthetic process	405	1.519962e-2	1.000000e+0	4.825598e-1	3.868571e+0	1.033973e+0	4	12	2.285714e-2	3.333333e-1	1	2	29	CpG_1840,CpG_1841,CpG_1842,CpG_1843	CpG_1839,CpG_1840,CpG_1841,CpG_1842,CpG_1843,CpG_1844,CpG_1845,CpG_897,CpG_898,CpG_899,CpG_900,CpG_901	Has3	Has3,Ndst1
GO Biological Process	GO:0044264	cellular polysaccharide metabolic process	405	1.519962e-2	1.000000e+0	4.825598e-1	3.868571e+0	1.033973e+0	4	12	2.285714e-2	3.333333e-1	1	2	61	CpG_1840,CpG_1841,CpG_1842,CpG_1843	CpG_1839,CpG_1840,CpG_1841,CpG_1842,CpG_1843,CpG_1844,CpG_1845,CpG_897,CpG_898,CpG_899,CpG_900,CpG_901	Has3	Has3,Ndst1
GO Biological Process	GO:1903510	mucopolysaccharide metabolic process	405	1.519962e-2	1.000000e+0	4.825598e-1	3.868571e+0	1.033973e+0	4	12	2.285714e-2	3.333333e-1	1	2	61	CpG_1840,CpG_1841,CpG_1842,CpG_1843	CpG_1839,CpG_1840,CpG_1841,CpG_1842,CpG_1843,CpG_1844,CpG_1845,CpG_897,CpG_898,CpG_899,CpG_900,CpG_901	Has3	Has3,Ndst1
GO Biological Process	GO:0048103	somatic stem cell division	405	1.519962e-2	1.000000e+0	4.825598e-1	3.868571e+0	1.033973e+0	4	12	2.285714e-2	3.333333e-1	2	2	24	CpG_207,CpG_40,CpG_41,CpG_42	CpG_203,CpG_204,CpG_205,CpG_206,CpG_207,CpG_208,CpG_209,CpG_210,CpG_211,CpG_40,CpG_41,CpG_42	Tgfb2,Wnt3a	Tgfb2,Wnt3a
GO Biological Process	GO:0030203	glycosaminoglycan metabolic process	405	1.519962e-2	1.000000e+0	4.825598e-1	3.868571e+0	1.033973e+0	4	12	2.285714e-2	3.333333e-1	1	2	83	CpG_1840,CpG_1841,CpG_1842,CpG_1843	CpG_1839,CpG_1840,CpG_1841,CpG_1842,CpG_1843,CpG_1844,CpG_1845,CpG_897,CpG_898,CpG_899,CpG_900,CpG_901	Has3	Has3,Ndst1
GO Biological Process	GO:0043044	ATP-dependent chromatin remodeling	405	1.519962e-2	1.000000e+0	4.825598e-1	3.868571e+0	1.033973e+0	4	12	2.285714e-2	3.333333e-1	2	2	45	CpG_21,CpG_22,CpG_907,CpG_914	CpG_19,CpG_20,CpG_21,CpG_22,CpG_907,CpG_908,CpG_909,CpG_910,CpG_911,CpG_912,CpG_913,CpG_914	Mbd2,Tnp1	Mbd2,Tnp1
GO Biological Process	GO:0010810	regulation of cell-substrate adhesion	405	1.519962e-2	1.000000e+0	4.825598e-1	3.868571e+0	1.033973e+0	4	12	2.285714e-2	3.333333e-1	2	4	182	CpG_257,CpG_258,CpG_259,CpG_640	CpG_1220,CpG_257,CpG_258,CpG_259,CpG_640,CpG_641,CpG_642,CpG_818,CpG_819,CpG_820,CpG_821,CpG_822	Bcas3,Fbln1	Bcas3,Csf1,Ddr1,Fbln1
GO Biological Process	GO:0000271	polysaccharide biosynthetic process	405	1.519962e-2	1.000000e+0	4.825598e-1	3.868571e+0	1.033973e+0	4	12	2.285714e-2	3.333333e-1	1	2	31	CpG_1840,CpG_1841,CpG_1842,CpG_1843	CpG_1839,CpG_1840,CpG_1841,CpG_1842,CpG_1843,CpG_1844,CpG_1845,CpG_897,CpG_898,CpG_899,CpG_900,CpG_901	Has3	Has3,Ndst1
GO Biological Process	GO:0006022	aminoglycan metabolic process	405	1.519962e-2	1.000000e+0	4.825598e-1	3.868571e+0	1.033973e+0	4	12	2.285714e-2	3.333333e-1	1	2	97	CpG_1840,CpG_1841,CpG_1842,CpG_1843	CpG_1839,CpG_1840,CpG_1841,CpG_1842,CpG_1843,CpG_1844,CpG_1845,CpG_897,CpG_898,CpG_899,CpG_900,CpG_901	Has3	Has3,Ndst1
GO Biological Process	GO:0005976	polysaccharide metabolic process	405	1.519962e-2	1.000000e+0	4.825598e-1	3.868571e+0	1.033973e+0	4	12	2.285714e-2	3.333333e-1	1	2	66	CpG_1840,CpG_1841,CpG_1842,CpG_1843	CpG_1839,CpG_1840,CpG_1841,CpG_1842,CpG_1843,CpG_1844,CpG_1845,CpG_897,CpG_898,CpG_899,CpG_900,CpG_901	Has3	Has3,Ndst1
GO Biological Process	GO:0006024	glycosaminoglycan biosynthetic process	405	1.519962e-2	1.000000e+0	4.825598e-1	3.868571e+0	1.033973e+0	4	12	2.285714e-2	3.333333e-1	1	2	40	CpG_1840,CpG_1841,CpG_1842,CpG_1843	CpG_1839,CpG_1840,CpG_1841,CpG_1842,CpG_1843,CpG_1844,CpG_1845,CpG_897,CpG_898,CpG_899,CpG_900,CpG_901	Has3	Has3,Ndst1
GO Biological Process	GO:0006023	aminoglycan biosynthetic process	405	1.519962e-2	1.000000e+0	4.825598e-1	3.868571e+0	1.033973e+0	4	12	2.285714e-2	3.333333e-1	1	2	44	CpG_1840,CpG_1841,CpG_1842,CpG_1843	CpG_1839,CpG_1840,CpG_1841,CpG_1842,CpG_1843,CpG_1844,CpG_1845,CpG_897,CpG_898,CpG_899,CpG_900,CpG_901	Has3	Has3,Ndst1
GO Biological Process	GO:0033365	protein localization to organelle	418	1.520972e-2	1.000000e+0	4.678626e-1	3.223810e+0	1.550960e+0	5	18	2.857143e-2	2.777778e-1	2	4	513	CpG_40,CpG_41,CpG_42,CpG_80,CpG_82	CpG_1239,CpG_1240,CpG_1241,CpG_1242,CpG_1243,CpG_40,CpG_41,CpG_42,CpG_582,CpG_583,CpG_584,CpG_585,CpG_586,CpG_587,CpG_588,CpG_80,CpG_81,CpG_82	Abca7,Tgfb2	Abca7,Pibf1,Sec61b,Tgfb2
GO Biological Process	GO:0050776	regulation of immune response	419	1.546116e-2	1.000000e+0	4.744620e-1	1.730677e+0	9.822747e+0	17	114	9.714286e-2	1.491228e-1	6	21	617	CpG_1539,CpG_1540,CpG_1636,CpG_1637,CpG_184,CpG_262,CpG_40,CpG_41,CpG_42,CpG_990,CpG_991,CpG_994,CpG_995,CpG_996,CpG_997,CpG_998,CpG_999	CpG_1114,CpG_1115,CpG_1116,CpG_1117,CpG_1118,CpG_1222,CpG_1223,CpG_1224,CpG_1239,CpG_1240,CpG_1241,CpG_1242,CpG_1243,CpG_1539,CpG_1540,CpG_1541,CpG_1542,CpG_1543,CpG_1549,CpG_1550,CpG_1551,CpG_1552,CpG_1553,CpG_1635,CpG_1636,CpG_1637,CpG_1726,CpG_1727,CpG_1728,CpG_1729,CpG_1730,CpG_1731,CpG_1732,CpG_1733,CpG_1734,CpG_1773,CpG_1774,CpG_1775,CpG_1776,CpG_1777,CpG_184,CpG_185,CpG_186,CpG_187,CpG_188…	Gata2,Irgm1,Lsm14a,Phpt1,Tbx21,Tgfb2	Cadm1,Ccr7,Cfd,Cyld,Ddx58,Gata2,Irf7,Irgm1,Lsm14a,Nlrp6,Nod2,Nr4a3,Phpt1,Pparg,Ptprc,Rftn1,Sec14l1,Tbx21,Tgfb2,Tnip1,Zbp1
GO Biological Process	GO:0030162	regulation of proteolysis	420	1.602884e-2	1.000000e+0	4.907115e-1	1.614040e+0	1.301083e+1	21	151	1.200000e-1	1.390728e-1	11	25	726	CpG_1322,CpG_1433,CpG_1660,CpG_1815,CpG_1816,CpG_1818,CpG_1820,CpG_1822,CpG_1824,CpG_1826,CpG_1828,CpG_207,CpG_21,CpG_22,CpG_262,CpG_27,CpG_501,CpG_502,CpG_504,CpG_566,CpG_640	CpG_1077,CpG_1078,CpG_1322,CpG_1323,CpG_1335,CpG_1336,CpG_1337,CpG_1338,CpG_1339,CpG_1340,CpG_1431,CpG_1432,CpG_1433,CpG_1434,CpG_1435,CpG_1436,CpG_1437,CpG_1438,CpG_1439,CpG_1549,CpG_1550,CpG_1551,CpG_1552,CpG_1553,CpG_1595,CpG_1596,CpG_1597,CpG_1598,CpG_1599,CpG_1659,CpG_1660,CpG_1661,CpG_1662,CpG_1670,CpG_1671,CpG_1815,CpG_1816,CpG_1817,CpG_1818,CpG_1819,CpG_1820,CpG_1821,CpG_1822,CpG_1823,CpG…	Atpif1,Dapk1,Dnajb2,Fbln1,Nol3,Osbpl7,Pbk,Sirt4,Tnp1,Ube3a,Wnt3a	Apoe,Atpif1,Bcl2l11,Camk2n1,Ccbe1,Dapk1,Dnajb2,Fbln1,Foxl2,Mtch1,Nol3,Osbpl7,Pbk,Pdcd2,Pi16,Pparg,Rgma,Robo1,Rps6ka2,Sirt4,Tnip1,Tnp1,Ube3a,Wnt10b,Wnt3a
GO Biological Process	GO:1903524	positive regulation of blood circulation	421	1.697397e-2	1.000000e+0	5.184117e-1	4.973878e+0	6.031512e-1	3	7	1.714286e-2	4.285714e-1	1	2	69	CpG_40,CpG_41,CpG_42	CpG_1518,CpG_1519,CpG_1520,CpG_1521,CpG_40,CpG_41,CpG_42	Tgfb2	Tacr1,Tgfb2
GO Biological Process	GO:0060021	palate development	422	1.807496e-2	1.000000e+0	5.507295e-1	2.321143e+0	3.446578e+0	8	40	4.571429e-2	2.000000e-1	4	6	95	CpG_1693,CpG_207,CpG_257,CpG_258,CpG_259,CpG_40,CpG_41,CpG_42	CpG_1230,CpG_1231,CpG_1232,CpG_1233,CpG_1234,CpG_1235,CpG_1236,CpG_1237,CpG_1238,CpG_1688,CpG_1689,CpG_1690,CpG_1691,CpG_1692,CpG_1693,CpG_203,CpG_204,CpG_205,CpG_206,CpG_207,CpG_208,CpG_209,CpG_210,CpG_211,CpG_257,CpG_258,CpG_259,CpG_317,CpG_318,CpG_319,CpG_320,CpG_321,CpG_322,CpG_323,CpG_324,CpG_325,CpG_326,CpG_40,CpG_41,CpG_42	Tbx2,Tgfb2,Wnt11,Wnt3a	Foxe1,Fzd2,Tbx2,Tgfb2,Wnt11,Wnt3a
GO Biological Process	GO:0051270	regulation of cellular component movement	423	1.920426e-2	1.000000e+0	5.837550e-1	1.566415e+0	1.404481e+1	22	163	1.257143e-1	1.349693e-1	8	26	829	CpG_1693,CpG_207,CpG_257,CpG_258,CpG_259,CpG_282,CpG_283,CpG_287,CpG_289,CpG_40,CpG_41,CpG_42,CpG_640,CpG_766,CpG_990,CpG_991,CpG_994,CpG_995,CpG_996,CpG_997,CpG_998,CpG_999	CpG_1068,CpG_1069,CpG_1070,CpG_1071,CpG_1072,CpG_1073,CpG_1074,CpG_1075,CpG_1076,CpG_1220,CpG_1222,CpG_1223,CpG_1224,CpG_136,CpG_137,CpG_138,CpG_139,CpG_140,CpG_141,CpG_1415,CpG_1416,CpG_1417,CpG_1418,CpG_1419,CpG_142,CpG_1420,CpG_143,CpG_144,CpG_145,CpG_146,CpG_1502,CpG_1503,CpG_1504,CpG_1505,CpG_1506,CpG_1507,CpG_1508,CpG_1518,CpG_1519,CpG_1520,CpG_1521,CpG_1595,CpG_1596,CpG_1597,CpG_1598,CpG_1…	Bcas3,Fbln1,Phpt1,Srcin1,Tgfb2,Tiam1,Wnt11,Wnt3a	Apoe,Bcas3,Ccbe1,Ccr7,Csf1,Ddx58,Dll4,Fbln1,Gli1,Lrch1,Lrrc15,Nkx6-1,Nod2,Phpt1,Plxna4,Ptprc,Rhot1,Robo1,Sh3bp1,Srcin1,Tacr1,Tgfb2,Tiam1,Wnt11,Wnt3a,Zfp703
GO Biological Process	GO:0051260	protein homooligomerization	424	1.926482e-2	1.000000e+0	5.842148e-1	1.805333e+0	7.754801e+0	14	90	8.000000e-2	1.555556e-1	6	12	296	CpG_1322,CpG_1636,CpG_1637,CpG_1815,CpG_1816,CpG_1818,CpG_1820,CpG_1822,CpG_1824,CpG_1826,CpG_1828,CpG_358,CpG_566,CpG_640	CpG_1083,CpG_1084,CpG_1085,CpG_1086,CpG_1087,CpG_1088,CpG_1089,CpG_1090,CpG_1091,CpG_1092,CpG_1093,CpG_1094,CpG_1095,CpG_1096,CpG_1097,CpG_1098,CpG_1253,CpG_1254,CpG_1255,CpG_1256,CpG_1257,CpG_1258,CpG_1259,CpG_1260,CpG_1261,CpG_1262,CpG_1263,CpG_1264,CpG_1265,CpG_1266,CpG_1267,CpG_1268,CpG_1322,CpG_1323,CpG_1635,CpG_1636,CpG_1637,CpG_165,CpG_166,CpG_167,CpG_168,CpG_169,CpG_170,CpG_171,CpG_1815,C…	Atpif1,Atxn10,C1qtnf1,Hsf4,Kctd15,Scara5	Aldh5a1,Atpif1,Atxn10,C1qtnf1,Gpx3,Hsf4,Kcnrg,Kcns1,Kctd15,Npm1,Rasef,Scara5
GO Biological Process	GO:0014013	regulation of gliogenesis	425	1.945538e-2	1.000000e+0	5.886054e-1	2.461818e+0	2.843427e+0	7	33	4.000000e-2	2.121212e-1	3	6	98	CpG_1531,CpG_723,CpG_730,CpG_890,CpG_891,CpG_892,CpG_894	CpG_1220,CpG_1221,CpG_1415,CpG_1416,CpG_1417,CpG_1418,CpG_1419,CpG_1420,CpG_1522,CpG_1523,CpG_1524,CpG_1525,CpG_1526,CpG_1527,CpG_1528,CpG_1529,CpG_1530,CpG_1531,CpG_1532,CpG_722,CpG_723,CpG_724,CpG_725,CpG_726,CpG_727,CpG_728,CpG_729,CpG_730,CpG_890,CpG_891,CpG_892,CpG_893,CpG_894	Bin1,Emx1,Etv5	Bin1,Csf1,Emx1,Etv5,Nkx6-1,Plag1
GO Biological Process	GO:0098602	single organism cell adhesion	426	1.961469e-2	1.000000e+0	5.920321e-1	1.758442e+0	8.530281e+0	15	99	8.571429e-2	1.515152e-1	7	13	420	CpG_1284,CpG_161,CpG_162,CpG_164,CpG_207,CpG_262,CpG_282,CpG_283,CpG_287,CpG_289,CpG_40,CpG_41,CpG_42,CpG_643,CpG_662	CpG_1068,CpG_1069,CpG_1070,CpG_1071,CpG_1072,CpG_1073,CpG_1074,CpG_1075,CpG_1076,CpG_1284,CpG_1285,CpG_1286,CpG_1287,CpG_1288,CpG_161,CpG_162,CpG_163,CpG_164,CpG_1773,CpG_1774,CpG_1775,CpG_1776,CpG_1777,CpG_191,CpG_192,CpG_193,CpG_203,CpG_204,CpG_205,CpG_206,CpG_207,CpG_208,CpG_209,CpG_210,CpG_211,CpG_262,CpG_263,CpG_264,CpG_265,CpG_266,CpG_267,CpG_268,CpG_269,CpG_270,CpG_271,CpG_272,CpG_273,CpG_…	Bcl11a,Ifna13,Srcin1,Tbx21,Tgfb2,Wnt3a,Wnt7b	Bcl11a,Ccr7,Cyld,Dll4,Ifna13,Ptprc,Satb1,Srcin1,Tbx21,Tgfb2,Tnip1,Wnt3a,Wnt7b
GO Biological Process	GO:1903533	regulation of protein targeting	427	1.966017e-2	1.000000e+0	5.920151e-1	1.907789e+0	6.290005e+0	12	73	6.857143e-2	1.643836e-1	5	9	285	CpG_1322,CpG_1433,CpG_1815,CpG_1816,CpG_1818,CpG_1820,CpG_1822,CpG_1824,CpG_1826,CpG_1828,CpG_2000,CpG_207	CpG_1222,CpG_1223,CpG_1224,CpG_1322,CpG_1323,CpG_1431,CpG_1432,CpG_1433,CpG_1434,CpG_1435,CpG_1436,CpG_1437,CpG_1438,CpG_1439,CpG_1773,CpG_1774,CpG_1775,CpG_1776,CpG_1777,CpG_1815,CpG_1816,CpG_1817,CpG_1818,CpG_1819,CpG_1820,CpG_1821,CpG_1822,CpG_1823,CpG_1824,CpG_1825,CpG_1826,CpG_1827,CpG_1828,CpG_1829,CpG_1830,CpG_1831,CpG_2000,CpG_2001,CpG_2002,CpG_2003,CpG_2004,CpG_2005,CpG_2006,CpG_2007,CpG…	Atpif1,Nol3,Sirt4,Wnt3a,Zic1	Atpif1,Axin2,Cyld,Ddx58,Kcne1,Nol3,Sirt4,Wnt3a,Zic1
GO Biological Process	GO:0017145	stem cell division	428	2.011773e-2	1.000000e+0	6.043780e-1	2.678242e+0	2.240276e+0	6	26	3.428571e-2	2.307692e-1	3	4	40	CpG_207,CpG_40,CpG_41,CpG_42,CpG_723,CpG_730	CpG_203,CpG_204,CpG_205,CpG_206,CpG_207,CpG_208,CpG_209,CpG_210,CpG_211,CpG_40,CpG_41,CpG_42,CpG_459,CpG_460,CpG_461,CpG_462,CpG_463,CpG_722,CpG_723,CpG_724,CpG_725,CpG_726,CpG_727,CpG_728,CpG_729,CpG_730	Etv5,Tgfb2,Wnt3a	Esrrb,Etv5,Tgfb2,Wnt3a
GO Biological Process	GO:0035616	histone H2B conserved C-terminal lysine deubiquitination	429	2.050643e-2	1.000000e+0	6.146193e-1	3.570989e+0	1.120138e+0	4	13	2.285714e-2	3.076923e-1	1	1	4	CpG_282,CpG_283,CpG_287,CpG_289	CpG_280,CpG_281,CpG_282,CpG_283,CpG_284,CpG_285,CpG_286,CpG_287,CpG_288,CpG_289,CpG_290,CpG_291,CpG_292	Epop	Epop
GO Biological Process	GO:0016578	histone deubiquitination	429	2.050643e-2	1.000000e+0	6.146193e-1	3.570989e+0	1.120138e+0	4	13	2.285714e-2	3.076923e-1	1	1	22	CpG_282,CpG_283,CpG_287,CpG_289	CpG_280,CpG_281,CpG_282,CpG_283,CpG_284,CpG_285,CpG_286,CpG_287,CpG_288,CpG_289,CpG_290,CpG_291,CpG_292	Epop	Epop
GO Biological Process	GO:0060759	regulation of response to cytokine stimulus	431	2.051092e-2	1.000000e+0	6.119012e-1	1.964044e+0	5.600689e+0	11	65	6.285714e-2	1.692308e-1	3	12	100	CpG_1636,CpG_1637,CpG_1815,CpG_1816,CpG_1818,CpG_1820,CpG_1822,CpG_1824,CpG_1826,CpG_1828,CpG_184	CpG_1114,CpG_1115,CpG_1116,CpG_1117,CpG_1118,CpG_1180,CpG_1181,CpG_1182,CpG_1183,CpG_1184,CpG_1220,CpG_1222,CpG_1223,CpG_1224,CpG_1549,CpG_1550,CpG_1551,CpG_1552,CpG_1553,CpG_1635,CpG_1636,CpG_1637,CpG_1730,CpG_1731,CpG_1732,CpG_1733,CpG_1734,CpG_1773,CpG_1774,CpG_1775,CpG_1776,CpG_1777,CpG_1815,CpG_1816,CpG_1817,CpG_1818,CpG_1819,CpG_1820,CpG_1821,CpG_1822,CpG_1823,CpG_1824,CpG_1825,CpG_1826,CpG…	Irgm1,Lsm14a,Nol3	Csf1,Cyld,Ddx58,Hist2h2be,Irf7,Irgm1,Lsm14a,Nol3,Pparg,Ptprc,Robo1,Zbp1
GO Biological Process	GO:0016042	lipid catabolic process	432	2.085174e-2	1.000000e+0	6.206289e-1	2.264530e+0	3.532742e+0	8	41	4.571429e-2	1.951220e-1	3	7	236	CpG_1307,CpG_1308,CpG_1309,CpG_1433,CpG_1640,CpG_1641,CpG_1642,CpG_1644	CpG_1307,CpG_1308,CpG_1309,CpG_1431,CpG_1432,CpG_1433,CpG_1434,CpG_1435,CpG_1436,CpG_1437,CpG_1438,CpG_1439,CpG_1453,CpG_1454,CpG_1455,CpG_1595,CpG_1596,CpG_1597,CpG_1598,CpG_1599,CpG_1640,CpG_1641,CpG_1642,CpG_1643,CpG_1644,CpG_1700,CpG_1701,CpG_1702,CpG_1703,CpG_1704,CpG_1705,CpG_529,CpG_530,CpG_531,CpG_532,CpG_533,CpG_534,CpG_535,CpG_536,CpG_537,CpG_538	Cpt1c,Faah,Pla2g1b	Apoe,Cpt1c,Faah,Hacl1,Pla2g1b,Scarb1,Smpd1
GO Biological Process	GO:0008637	apoptotic mitochondrial changes	432	2.085174e-2	1.000000e+0	6.206289e-1	2.264530e+0	3.532742e+0	8	41	4.571429e-2	1.951220e-1	1	4	70	CpG_1815,CpG_1816,CpG_1818,CpG_1820,CpG_1822,CpG_1824,CpG_1826,CpG_1828	CpG_1077,CpG_1078,CpG_1815,CpG_1816,CpG_1817,CpG_1818,CpG_1819,CpG_1820,CpG_1821,CpG_1822,CpG_1823,CpG_1824,CpG_1825,CpG_1826,CpG_1827,CpG_1828,CpG_1829,CpG_1830,CpG_1831,CpG_240,CpG_241,CpG_242,CpG_243,CpG_244,CpG_245,CpG_246,CpG_247,CpG_248,CpG_249,CpG_250,CpG_251,CpG_252,CpG_620,CpG_621,CpG_622,CpG_623,CpG_624,CpG_625,CpG_626,CpG_627,CpG_628	Nol3	Bcl2l11,Bik,Nol3,Rhot1
GO Biological Process	GO:1900223	positive regulation of beta-amyloid clearance	434	2.089714e-2	1.000000e+0	6.191139e-1	7.737143e+0	2.584934e-1	2	3	1.142857e-2	6.666667e-1	1	1	3	CpG_80,CpG_82	CpG_80,CpG_81,CpG_82	Abca7	Abca7
GO Biological Process	GO:0042985	negative regulation of amyloid precursor protein biosynthetic process	434	2.089714e-2	1.000000e+0	6.191139e-1	7.737143e+0	2.584934e-1	2	3	1.142857e-2	6.666667e-1	1	1	6	CpG_80,CpG_82	CpG_80,CpG_81,CpG_82	Abca7	Abca7
GO Biological Process	GO:0042984	regulation of amyloid precursor protein biosynthetic process	434	2.089714e-2	1.000000e+0	6.191139e-1	7.737143e+0	2.584934e-1	2	3	1.142857e-2	6.666667e-1	1	1	9	CpG_80,CpG_82	CpG_80,CpG_81,CpG_82	Abca7	Abca7
GO Biological Process	GO:1901074	regulation of engulfment of apoptotic cell	434	2.089714e-2	1.000000e+0	6.191139e-1	7.737143e+0	2.584934e-1	2	3	1.142857e-2	6.666667e-1	1	1	2	CpG_80,CpG_82	CpG_80,CpG_81,CpG_82	Abca7	Abca7
GO Biological Process	GO:1901076	positive regulation of engulfment of apoptotic cell	434	2.089714e-2	1.000000e+0	6.191139e-1	7.737143e+0	2.584934e-1	2	3	1.142857e-2	6.666667e-1	1	1	1	CpG_80,CpG_82	CpG_80,CpG_81,CpG_82	Abca7	Abca7
GO Biological Process	GO:2000425	regulation of apoptotic cell clearance	434	2.089714e-2	1.000000e+0	6.191139e-1	7.737143e+0	2.584934e-1	2	3	1.142857e-2	6.666667e-1	1	1	9	CpG_80,CpG_82	CpG_80,CpG_81,CpG_82	Abca7	Abca7
GO Biological Process	GO:0038027	apolipoprotein A-I-mediated signaling pathway	434	2.089714e-2	1.000000e+0	6.191139e-1	7.737143e+0	2.584934e-1	2	3	1.142857e-2	6.666667e-1	1	1	5	CpG_80,CpG_82	CpG_80,CpG_81,CpG_82	Abca7	Abca7
GO Biological Process	GO:2000427	positive regulation of apoptotic cell clearance	434	2.089714e-2	1.000000e+0	6.191139e-1	7.737143e+0	2.584934e-1	2	3	1.142857e-2	6.666667e-1	1	1	6	CpG_80,CpG_82	CpG_80,CpG_81,CpG_82	Abca7	Abca7
GO Biological Process	GO:1903019	negative regulation of glycoprotein metabolic process	434	2.089714e-2	1.000000e+0	6.191139e-1	7.737143e+0	2.584934e-1	2	3	1.142857e-2	6.666667e-1	1	1	18	CpG_80,CpG_82	CpG_80,CpG_81,CpG_82	Abca7	Abca7
GO Biological Process	GO:0033962	cytoplasmic mRNA processing body assembly	434	2.089714e-2	1.000000e+0	6.191139e-1	7.737143e+0	2.584934e-1	2	3	1.142857e-2	6.666667e-1	1	1	12	CpG_1636,CpG_1637	CpG_1635,CpG_1636,CpG_1637	Lsm14a	Lsm14a
GO Biological Process	GO:0009584	detection of visible light	434	2.089714e-2	1.000000e+0	6.191139e-1	7.737143e+0	2.584934e-1	2	3	1.142857e-2	6.666667e-1	1	1	35	CpG_548,CpG_550	CpG_548,CpG_549,CpG_550	Opn4	Opn4
GO Biological Process	GO:0007603	phototransduction, visible light	434	2.089714e-2	1.000000e+0	6.191139e-1	7.737143e+0	2.584934e-1	2	3	1.142857e-2	6.666667e-1	1	1	8	CpG_548,CpG_550	CpG_548,CpG_549,CpG_550	Opn4	Opn4
GO Biological Process	GO:0015917	aminophospholipid transport	434	2.089714e-2	1.000000e+0	6.191139e-1	7.737143e+0	2.584934e-1	2	3	1.142857e-2	6.666667e-1	1	1	5	CpG_80,CpG_82	CpG_80,CpG_81,CpG_82	Abca7	Abca7
GO Biological Process	GO:0010561	negative regulation of glycoprotein biosynthetic process	434	2.089714e-2	1.000000e+0	6.191139e-1	7.737143e+0	2.584934e-1	2	3	1.142857e-2	6.666667e-1	1	1	15	CpG_80,CpG_82	CpG_80,CpG_81,CpG_82	Abca7	Abca7
GO Biological Process	GO:0016056	rhodopsin mediated signaling pathway	434	2.089714e-2	1.000000e+0	6.191139e-1	7.737143e+0	2.584934e-1	2	3	1.142857e-2	6.666667e-1	1	1	5	CpG_548,CpG_550	CpG_548,CpG_549,CpG_550	Opn4	Opn4
GO Biological Process	GO:0018298	protein-chromophore linkage	434	2.089714e-2	1.000000e+0	6.191139e-1	7.737143e+0	2.584934e-1	2	3	1.142857e-2	6.666667e-1	1	1	11	CpG_548,CpG_550	CpG_548,CpG_549,CpG_550	Opn4	Opn4
GO Biological Process	GO:0018149	peptide cross-linking	434	2.089714e-2	1.000000e+0	6.191139e-1	7.737143e+0	2.584934e-1	2	3	1.142857e-2	6.666667e-1	1	1	63	CpG_80,CpG_82	CpG_80,CpG_81,CpG_82	Abca7	Abca7
GO Biological Process	GO:1904589	regulation of protein import	451	2.110519e-2	1.000000e+0	6.017085e-1	2.036090e+0	4.911374e+0	10	57	5.714286e-2	1.754386e-1	3	6	167	CpG_1815,CpG_1816,CpG_1818,CpG_1820,CpG_1822,CpG_1824,CpG_1826,CpG_1828,CpG_2000,CpG_207	CpG_1222,CpG_1223,CpG_1224,CpG_1773,CpG_1774,CpG_1775,CpG_1776,CpG_1777,CpG_1815,CpG_1816,CpG_1817,CpG_1818,CpG_1819,CpG_1820,CpG_1821,CpG_1822,CpG_1823,CpG_1824,CpG_1825,CpG_1826,CpG_1827,CpG_1828,CpG_1829,CpG_1830,CpG_1831,CpG_2000,CpG_2001,CpG_2002,CpG_2003,CpG_2004,CpG_2005,CpG_2006,CpG_2007,CpG_2008,CpG_2009,CpG_2010,CpG_2011,CpG_203,CpG_204,CpG_205,CpG_206,CpG_207,CpG_208,CpG_209,CpG_210,Cp…	Nol3,Wnt3a,Zic1	Axin2,Cyld,Ddx58,Nol3,Wnt3a,Zic1
GO Biological Process	GO:0042306	regulation of protein import into nucleus	451	2.110519e-2	1.000000e+0	6.017085e-1	2.036090e+0	4.911374e+0	10	57	5.714286e-2	1.754386e-1	3	6	165	CpG_1815,CpG_1816,CpG_1818,CpG_1820,CpG_1822,CpG_1824,CpG_1826,CpG_1828,CpG_2000,CpG_207	CpG_1222,CpG_1223,CpG_1224,CpG_1773,CpG_1774,CpG_1775,CpG_1776,CpG_1777,CpG_1815,CpG_1816,CpG_1817,CpG_1818,CpG_1819,CpG_1820,CpG_1821,CpG_1822,CpG_1823,CpG_1824,CpG_1825,CpG_1826,CpG_1827,CpG_1828,CpG_1829,CpG_1830,CpG_1831,CpG_2000,CpG_2001,CpG_2002,CpG_2003,CpG_2004,CpG_2005,CpG_2006,CpG_2007,CpG_2008,CpG_2009,CpG_2010,CpG_2011,CpG_203,CpG_204,CpG_205,CpG_206,CpG_207,CpG_208,CpG_209,CpG_210,Cp…	Nol3,Wnt3a,Zic1	Axin2,Cyld,Ddx58,Nol3,Wnt3a,Zic1
GO Biological Process	GO:0046822	regulation of nucleocytoplasmic transport	451	2.110519e-2	1.000000e+0	6.017085e-1	2.036090e+0	4.911374e+0	10	57	5.714286e-2	1.754386e-1	3	6	210	CpG_1815,CpG_1816,CpG_1818,CpG_1820,CpG_1822,CpG_1824,CpG_1826,CpG_1828,CpG_2000,CpG_207	CpG_1222,CpG_1223,CpG_1224,CpG_1773,CpG_1774,CpG_1775,CpG_1776,CpG_1777,CpG_1815,CpG_1816,CpG_1817,CpG_1818,CpG_1819,CpG_1820,CpG_1821,CpG_1822,CpG_1823,CpG_1824,CpG_1825,CpG_1826,CpG_1827,CpG_1828,CpG_1829,CpG_1830,CpG_1831,CpG_2000,CpG_2001,CpG_2002,CpG_2003,CpG_2004,CpG_2005,CpG_2006,CpG_2007,CpG_2008,CpG_2009,CpG_2010,CpG_2011,CpG_203,CpG_204,CpG_205,CpG_206,CpG_207,CpG_208,CpG_209,CpG_210,Cp…	Nol3,Wnt3a,Zic1	Axin2,Cyld,Ddx58,Nol3,Wnt3a,Zic1
GO Biological Process	GO:0010469	regulation of receptor activity	454	2.281597e-2	1.000000e+0	6.461845e-1	1.934286e+0	5.686854e+0	11	66	6.285714e-2	1.666667e-1	6	11	579	CpG_1284,CpG_207,CpG_40,CpG_41,CpG_42,CpG_501,CpG_502,CpG_504,CpG_643,CpG_662,CpG_970	CpG_1056,CpG_1057,CpG_1058,CpG_1220,CpG_1284,CpG_1285,CpG_1286,CpG_1287,CpG_1288,CpG_1564,CpG_1565,CpG_1566,CpG_1567,CpG_1568,CpG_1569,CpG_203,CpG_204,CpG_205,CpG_206,CpG_207,CpG_208,CpG_209,CpG_210,CpG_211,CpG_40,CpG_41,CpG_42,CpG_500,CpG_501,CpG_502,CpG_503,CpG_504,CpG_610,CpG_611,CpG_612,CpG_613,CpG_643,CpG_644,CpG_645,CpG_646,CpG_647,CpG_648,CpG_649,CpG_650,CpG_651,CpG_652,CpG_653,CpG_654,CpG…	Dapk1,Ifna13,Neurl1a,Tgfb2,Wnt3a,Wnt7b	Bdnf,Csf1,Dapk1,Fgf8,Gdf3,Ifna13,Neurl1a,Slurp2,Tgfb2,Wnt3a,Wnt7b
GO Biological Process	GO:0000122	negative regulation of transcription from RNA polymerase II promoter	455	2.303719e-2	1.000000e+0	6.510158e-1	1.397769e+0	2.360906e+1	33	274	1.885714e-1	1.204380e-1	13	40	836	CpG_101,CpG_102,CpG_103,CpG_105,CpG_106,CpG_1307,CpG_1308,CpG_1309,CpG_1539,CpG_1540,CpG_161,CpG_162,CpG_164,CpG_1815,CpG_1816,CpG_1818,CpG_1820,CpG_1822,CpG_1824,CpG_1826,CpG_1828,CpG_1846,CpG_1848,CpG_1927,CpG_257,CpG_258,CpG_259,CpG_262,CpG_476,CpG_662,CpG_851,CpG_907,CpG_914	CpG_100,CpG_101,CpG_102,CpG_103,CpG_104,CpG_105,CpG_106,CpG_1068,CpG_1069,CpG_107,CpG_1070,CpG_1071,CpG_1072,CpG_1073,CpG_1074,CpG_1075,CpG_1076,CpG_1105,CpG_1106,CpG_1107,CpG_1108,CpG_1109,CpG_1110,CpG_1111,CpG_1112,CpG_1113,CpG_1230,CpG_1231,CpG_1232,CpG_1233,CpG_1234,CpG_1235,CpG_1236,CpG_1237,CpG_1238,CpG_1239,CpG_1240,CpG_1241,CpG_1242,CpG_1243,CpG_1289,CpG_1290,CpG_1291,CpG_1292,CpG_1293,Cp…	Bcl11a,Dmbx1,Foxp4,Gata2,Hsf4,Kank2,Mbd2,Nfic,Ppara,Rcor1,Tbx2,Tbx21,Zfhx3	Bach1,Bcl11a,Cbx4,Cbx8,Ciita,Dll4,Dmbx1,Esrrb,Ets2,Foxd3,Foxe1,Foxl2,Foxp4,Gata2,Gata6,Hand1,Hsf4,Kank2,Maf,Mbd2,Mef2a,Ncor2,Nfic,Nfix,Nkx6-1,Nr4a3,Ppara,Pparg,Rcor1,Rps14,Sall4,Satb1,Tbx2,Tbx21,Tshz3,Wnt10b,Zfhx3,Zfp148,Zfp382,Zfp536
GO Biological Process	GO:0060485	mesenchyme development	456	2.365136e-2	1.000000e+0	6.669061e-1	2.000985e+0	4.997538e+0	10	58	5.714286e-2	1.724138e-1	5	7	194	CpG_1693,CpG_207,CpG_257,CpG_258,CpG_259,CpG_40,CpG_41,CpG_42,CpG_643,CpG_662	CpG_1688,CpG_1689,CpG_1690,CpG_1691,CpG_1692,CpG_1693,CpG_194,CpG_195,CpG_196,CpG_197,CpG_198,CpG_199,CpG_200,CpG_201,CpG_202,CpG_203,CpG_204,CpG_205,CpG_206,CpG_207,CpG_208,CpG_209,CpG_210,CpG_211,CpG_257,CpG_258,CpG_259,CpG_40,CpG_41,CpG_42,CpG_643,CpG_644,CpG_645,CpG_646,CpG_647,CpG_648,CpG_649,CpG_650,CpG_651,CpG_652,CpG_653,CpG_654,CpG_655,CpG_656,CpG_657,CpG_658,CpG_659,CpG_660,CpG_661,CpG_…	Tbx2,Tgfb2,Wnt11,Wnt3a,Wnt7b	Fgf8,Hand1,Tbx2,Tgfb2,Wnt11,Wnt3a,Wnt7b
GO Biological Process	GO:0048534	hematopoietic or lymphoid organ development	457	2.388844e-2	1.000000e+0	6.721172e-1	1.597888e+0	1.189069e+1	19	138	1.085714e-1	1.376812e-1	11	28	687	CpG_1284,CpG_1322,CpG_1539,CpG_1540,CpG_161,CpG_162,CpG_164,CpG_207,CpG_262,CpG_40,CpG_41,CpG_42,CpG_476,CpG_84,CpG_970,CpG_983,CpG_985,CpG_986,CpG_987	CpG_1068,CpG_1069,CpG_1070,CpG_1071,CpG_1072,CpG_1073,CpG_1074,CpG_1075,CpG_1076,CpG_1077,CpG_1078,CpG_1083,CpG_1084,CpG_1085,CpG_1086,CpG_1087,CpG_1088,CpG_1089,CpG_1090,CpG_1091,CpG_1092,CpG_1093,CpG_1094,CpG_1095,CpG_1096,CpG_1097,CpG_1098,CpG_1131,CpG_1132,CpG_1133,CpG_1134,CpG_1135,CpG_1136,CpG_1137,CpG_1217,CpG_1218,CpG_1220,CpG_1230,CpG_1231,CpG_1232,CpG_1233,CpG_1234,CpG_1235,CpG_1236,CpG…	Atpif1,Bcl11a,Efna2,Gata2,Ifna13,Pip4k2a,Rcor1,Sh3pxd2a,Tbx21,Tgfb2,Wnt3a	Atpif1,Bcl11a,Bcl2l11,Ccr7,Chd2,Csf1,Cyld,Dll4,Efna2,Foxe1,Foxl1,Gata2,Ifna13,Pip4k2a,Pou2f2,Pparg,Ptprc,Rcor1,Rps14,Satb1,Sh3pxd2a,Stk4,Tbx21,Tgfb2,Tpd52,Wnt10b,Wnt2b,Wnt3a
GO Biological Process	GO:0002520	immune system development	457	2.388844e-2	1.000000e+0	6.721172e-1	1.597888e+0	1.189069e+1	19	138	1.085714e-1	1.376812e-1	11	28	714	CpG_1284,CpG_1322,CpG_1539,CpG_1540,CpG_161,CpG_162,CpG_164,CpG_207,CpG_262,CpG_40,CpG_41,CpG_42,CpG_476,CpG_84,CpG_970,CpG_983,CpG_985,CpG_986,CpG_987	CpG_1068,CpG_1069,CpG_1070,CpG_1071,CpG_1072,CpG_1073,CpG_1074,CpG_1075,CpG_1076,CpG_1077,CpG_1078,CpG_1083,CpG_1084,CpG_1085,CpG_1086,CpG_1087,CpG_1088,CpG_1089,CpG_1090,CpG_1091,CpG_1092,CpG_1093,CpG_1094,CpG_1095,CpG_1096,CpG_1097,CpG_1098,CpG_1131,CpG_1132,CpG_1133,CpG_1134,CpG_1135,CpG_1136,CpG_1137,CpG_1217,CpG_1218,CpG_1220,CpG_1230,CpG_1231,CpG_1232,CpG_1233,CpG_1234,CpG_1235,CpG_1236,CpG…	Atpif1,Bcl11a,Efna2,Gata2,Ifna13,Pip4k2a,Rcor1,Sh3pxd2a,Tbx21,Tgfb2,Wnt3a	Atpif1,Bcl11a,Bcl2l11,Ccr7,Chd2,Csf1,Cyld,Dll4,Efna2,Foxe1,Foxl1,Gata2,Ifna13,Pip4k2a,Pou2f2,Pparg,Ptprc,Rcor1,Rps14,Satb1,Sh3pxd2a,Stk4,Tbx21,Tgfb2,Tpd52,Wnt10b,Wnt2b,Wnt3a
GO Biological Process	GO:0006260	DNA replication	459	2.390324e-2	1.000000e+0	6.696032e-1	2.901429e+0	1.723289e+0	5	20	2.857143e-2	2.500000e-1	1	3	161	CpG_101,CpG_102,CpG_103,CpG_105,CpG_106	CpG_100,CpG_101,CpG_102,CpG_103,CpG_104,CpG_105,CpG_106,CpG_107,CpG_1767,CpG_1768,CpG_874,CpG_875,CpG_92,CpG_93,CpG_94,CpG_95,CpG_96,CpG_97,CpG_98,CpG_99	Nfic	Ddx11,Nfic,Nfix
GO Biological Process	GO:0051050	positive regulation of transport	460	2.398050e-2	1.000000e+0	6.703071e-1	1.516656e+0	1.516494e+1	23	176	1.314286e-1	1.306818e-1	12	31	942	CpG_1322,CpG_1539,CpG_1540,CpG_2000,CpG_207,CpG_235,CpG_257,CpG_258,CpG_259,CpG_358,CpG_40,CpG_41,CpG_42,CpG_80,CpG_82,CpG_990,CpG_991,CpG_994,CpG_995,CpG_996,CpG_997,CpG_998,CpG_999	CpG_1220,CpG_1222,CpG_1223,CpG_1224,CpG_1239,CpG_1240,CpG_1241,CpG_1242,CpG_1243,CpG_1322,CpG_1323,CpG_1415,CpG_1416,CpG_1417,CpG_1418,CpG_1419,CpG_1420,CpG_1469,CpG_1470,CpG_1518,CpG_1519,CpG_1520,CpG_1521,CpG_1539,CpG_1540,CpG_1541,CpG_1542,CpG_1543,CpG_1554,CpG_1555,CpG_1556,CpG_1557,CpG_1558,CpG_1559,CpG_1560,CpG_1561,CpG_1562,CpG_1563,CpG_1595,CpG_1596,CpG_1597,CpG_1598,CpG_1599,CpG_1694,CpG…	Abca7,Arf1,Atpif1,Bcas3,C1qtnf1,Doc2b,Gata2,Phpt1,Rph3al,Tgfb2,Wnt3a,Zic1	Abca7,Ahcyl1,Apoe,Arf1,Atpif1,Bcas3,C1qtnf1,Cadm1,Ccr7,Ddx58,Doc2b,Foxl2,Gata2,Grik1,Il17ra,Kcne1,Nkx6-1,Nod2,Nr4a3,Numa1,Phpt1,Rab3a,Rph3al,Sec16b,Stx1a,Tacr1,Tbc1d5,Tgfb2,Trpv2,Wnt3a,Zic1
GO Biological Process	GO:0003148	outflow tract septum morphogenesis	461	2.406897e-2	1.000000e+0	6.713206e-1	2.579048e+0	2.326440e+0	6	27	3.428571e-2	2.222222e-1	2	4	27	CpG_257,CpG_258,CpG_259,CpG_40,CpG_41,CpG_42	CpG_257,CpG_258,CpG_259,CpG_40,CpG_41,CpG_42,CpG_876,CpG_877,CpG_878,CpG_879,CpG_880,CpG_881,CpG_882,CpG_883,CpG_884,CpG_885,CpG_886,CpG_887,CpG_888,CpG_889,CpG_959,CpG_960,CpG_961,CpG_962,CpG_963,CpG_964,CpG_965	Tbx2,Tgfb2	Fgf8,Gata6,Tbx2,Tgfb2
GO Biological Process	GO:0035904	aorta development	461	2.406897e-2	1.000000e+0	6.713206e-1	2.579048e+0	2.326440e+0	6	27	3.428571e-2	2.222222e-1	2	5	55	CpG_257,CpG_258,CpG_259,CpG_40,CpG_41,CpG_42	CpG_1068,CpG_1069,CpG_1070,CpG_1071,CpG_1072,CpG_1073,CpG_1074,CpG_1075,CpG_1076,CpG_257,CpG_258,CpG_259,CpG_40,CpG_41,CpG_42,CpG_897,CpG_898,CpG_899,CpG_900,CpG_901,CpG_959,CpG_960,CpG_961,CpG_962,CpG_963,CpG_964,CpG_965	Tbx2,Tgfb2	Dll4,Fgf8,Ndst1,Tbx2,Tgfb2
GO Biological Process	GO:0008016	regulation of heart contraction	461	2.406897e-2	1.000000e+0	6.713206e-1	2.579048e+0	2.326440e+0	6	27	3.428571e-2	2.222222e-1	2	6	164	CpG_257,CpG_258,CpG_259,CpG_40,CpG_41,CpG_42	CpG_1663,CpG_1664,CpG_1665,CpG_1666,CpG_1667,CpG_1668,CpG_1669,CpG_1778,CpG_1779,CpG_1780,CpG_1781,CpG_1782,CpG_1783,CpG_1784,CpG_257,CpG_258,CpG_259,CpG_40,CpG_41,CpG_42,CpG_767,CpG_768,CpG_769,CpG_770,CpG_771,CpG_895,CpG_896	Tbx2,Tgfb2	Irx5,Kcne1,Kcnn2,Mef2a,Tbx2,Tgfb2
GO Biological Process	GO:0031346	positive regulation of cell projection organization	464	2.409609e-2	1.000000e+0	6.677317e-1	2.089029e+0	4.308223e+0	9	50	5.142857e-2	1.800000e-1	6	13	338	CpG_161,CpG_162,CpG_164,CpG_207,CpG_257,CpG_258,CpG_259,CpG_766,CpG_970	CpG_1056,CpG_1057,CpG_1058,CpG_1595,CpG_1596,CpG_1597,CpG_1598,CpG_1599,CpG_161,CpG_162,CpG_163,CpG_164,CpG_1670,CpG_1671,CpG_203,CpG_204,CpG_205,CpG_206,CpG_207,CpG_208,CpG_209,CpG_210,CpG_211,CpG_212,CpG_213,CpG_214,CpG_215,CpG_216,CpG_217,CpG_257,CpG_258,CpG_259,CpG_305,CpG_306,CpG_307,CpG_355,CpG_356,CpG_357,CpG_754,CpG_755,CpG_756,CpG_757,CpG_758,CpG_759,CpG_763,CpG_764,CpG_765,CpG_766,CpG_9…	Arf1,Bcas3,Bcl11a,Neurl1a,Tiam1,Wnt3a	Apoe,Arf1,Bcas3,Bcl11a,Bdnf,Ccr7,Neurl1a,Rgma,Robo1,Sept9,Tiam1,Trpv2,Wnt3a
GO Biological Process	GO:0030155	regulation of cell adhesion	465	2.483057e-2	1.000000e+0	6.866053e-1	1.644143e+0	1.033973e+1	17	120	9.714286e-2	1.416667e-1	9	19	629	CpG_207,CpG_257,CpG_258,CpG_259,CpG_262,CpG_282,CpG_283,CpG_287,CpG_289,CpG_358,CpG_40,CpG_41,CpG_42,CpG_640,CpG_662,CpG_949,CpG_953	CpG_1220,CpG_1239,CpG_1240,CpG_1241,CpG_1242,CpG_1243,CpG_1738,CpG_1739,CpG_1740,CpG_1741,CpG_1773,CpG_1774,CpG_1775,CpG_1776,CpG_1777,CpG_1869,CpG_1870,CpG_1871,CpG_203,CpG_204,CpG_205,CpG_206,CpG_207,CpG_208,CpG_209,CpG_210,CpG_211,CpG_257,CpG_258,CpG_259,CpG_262,CpG_263,CpG_264,CpG_265,CpG_266,CpG_267,CpG_268,CpG_269,CpG_270,CpG_271,CpG_272,CpG_273,CpG_274,CpG_275,CpG_276,CpG_277,CpG_278,CpG_2…	Bcas3,C1qtnf1,Cd5,Fbln1,Ppara,Srcin1,Tbx21,Tgfb2,Wnt3a	Adamts18,Bcas3,C1qtnf1,Ccr7,Cd5,Csf1,Cyld,Ddr1,Egr3,Fbln1,Nr4a3,Ppara,Ptprc,Srcin1,Tbx21,Tgfb2,Wnt3a,Zfp703,Zmiz1
GO Biological Process	GO:0001654	eye development	465	2.483057e-2	1.000000e+0	6.866053e-1	1.644143e+0	1.033973e+1	17	120	9.714286e-2	1.416667e-1	5	17	377	CpG_1159,CpG_1160,CpG_1815,CpG_1816,CpG_1818,CpG_1820,CpG_1822,CpG_1824,CpG_1826,CpG_1828,CpG_255,CpG_257,CpG_258,CpG_259,CpG_40,CpG_41,CpG_42	CpG_1059,CpG_1060,CpG_1061,CpG_1062,CpG_1063,CpG_1064,CpG_1065,CpG_1066,CpG_1067,CpG_1079,CpG_1080,CpG_1081,CpG_1082,CpG_115,CpG_1150,CpG_1151,CpG_1152,CpG_1153,CpG_1154,CpG_1155,CpG_1156,CpG_1157,CpG_1158,CpG_1159,CpG_116,CpG_1160,CpG_1161,CpG_1162,CpG_1163,CpG_1164,CpG_1165,CpG_1166,CpG_1167,CpG_1168,CpG_1169,CpG_117,CpG_1170,CpG_1171,CpG_1172,CpG_1173,CpG_1174,CpG_118,CpG_119,CpG_1421,CpG_1422…	Hsf4,Mab21l1,Tbx2,Tgfb2,Unc45b	Adamts18,Bloc1s3,Cryba4,Foxl2,Gdf3,Hsf4,Irx5,Mab21l1,Mab21l2,Maf,Mdm1,Meis2,Sdk2,Tbx2,Tgfb2,Unc45b,Xrn2
GO Biological Process	GO:0019725	cellular homeostasis	465	2.483057e-2	1.000000e+0	6.866053e-1	1.644143e+0	1.033973e+1	17	120	9.714286e-2	1.416667e-1	9	18	710	CpG_1539,CpG_1540,CpG_1815,CpG_1816,CpG_1818,CpG_1820,CpG_1822,CpG_1824,CpG_1826,CpG_1828,CpG_1866,CpG_207,CpG_27,CpG_315,CpG_358,CpG_566,CpG_766	CpG_1222,CpG_1223,CpG_1224,CpG_1518,CpG_1519,CpG_1520,CpG_1521,CpG_1539,CpG_1540,CpG_1541,CpG_1542,CpG_1543,CpG_1595,CpG_1596,CpG_1597,CpG_1598,CpG_1599,CpG_165,CpG_166,CpG_167,CpG_168,CpG_169,CpG_170,CpG_171,CpG_1815,CpG_1816,CpG_1817,CpG_1818,CpG_1819,CpG_1820,CpG_1821,CpG_1822,CpG_1823,CpG_1824,CpG_1825,CpG_1826,CpG_1827,CpG_1828,CpG_1829,CpG_1830,CpG_1831,CpG_1832,CpG_1833,CpG_1834,CpG_1835,C…	Arf1,C1qtnf1,Calb2,Gata2,Nol3,Ptprn,Scara5,Sod1,Wnk4	Aco1,Apoe,Arf1,C1qtnf1,Calb2,E2f4,Gata2,Mcur1,Nhlrc2,Nol3,Npm1,Ptprc,Ptprn,Rhot1,Scara5,Sod1,Tacr1,Wnk4
GO Biological Process	GO:0051338	regulation of transferase activity	468	2.490909e-2	1.000000e+0	6.843613e-1	1.568340e+0	1.275234e+1	20	148	1.142857e-1	1.351351e-1	9	24	859	CpG_1693,CpG_1969,CpG_207,CpG_282,CpG_283,CpG_287,CpG_289,CpG_40,CpG_41,CpG_42,CpG_766,CpG_970,CpG_990,CpG_991,CpG_994,CpG_995,CpG_996,CpG_997,CpG_998,CpG_999	CpG_1077,CpG_1078,CpG_1083,CpG_1084,CpG_1085,CpG_1086,CpG_1087,CpG_1088,CpG_1089,CpG_1090,CpG_1091,CpG_1092,CpG_1093,CpG_1094,CpG_1095,CpG_1096,CpG_1097,CpG_1098,CpG_1220,CpG_1335,CpG_1336,CpG_1337,CpG_1338,CpG_1339,CpG_1340,CpG_1595,CpG_1596,CpG_1597,CpG_1598,CpG_1599,CpG_165,CpG_166,CpG_167,CpG_168,CpG_1688,CpG_1689,CpG_169,CpG_1690,CpG_1691,CpG_1692,CpG_1693,CpG_170,CpG_1700,CpG_1701,CpG_1702,…	Neurl1a,Phpt1,Rplp1,Sod1,Srcin1,Tgfb2,Uvrag,Wnt11,Wnt3a	Apoe,Camk2n1,Ccr7,Csf1,Lrrc15,Map3k9,Neurl1a,Nod2,Npm1,Parn,Phpt1,Pibf1,Ptprc,Robo1,Rplp1,Smpd1,Sod1,Spdye4c,Srcin1,Stk4,Tgfb2,Uvrag,Wnt11,Wnt3a
GO Biological Process	GO:0072594	establishment of protein localization to organelle	469	2.546022e-2	1.000000e+0	6.980117e-1	4.352143e+0	6.893156e-1	3	8	1.714286e-2	3.750000e-1	1	2	282	CpG_40,CpG_41,CpG_42	CpG_1239,CpG_1240,CpG_1241,CpG_1242,CpG_1243,CpG_40,CpG_41,CpG_42	Tgfb2	Sec61b,Tgfb2
GO Biological Process	GO:0051151	negative regulation of smooth muscle cell differentiation	469	2.546022e-2	1.000000e+0	6.980117e-1	4.352143e+0	6.893156e-1	3	8	1.714286e-2	3.750000e-1	1	1	11	CpG_1972,CpG_1977,CpG_1978	CpG_1971,CpG_1972,CpG_1973,CpG_1974,CpG_1975,CpG_1976,CpG_1977,CpG_1978	Rbpms2	Rbpms2
GO Biological Process	GO:0048819	regulation of hair follicle maturation	469	2.546022e-2	1.000000e+0	6.980117e-1	4.352143e+0	6.893156e-1	3	8	1.714286e-2	3.750000e-1	1	2	9	CpG_40,CpG_41,CpG_42	CpG_40,CpG_41,CpG_42,CpG_670,CpG_671,CpG_672,CpG_673,CpG_674	Tgfb2	Tgfb2,Wnt10b
GO Biological Process	GO:1901888	regulation of cell junction assembly	469	2.546022e-2	1.000000e+0	6.980117e-1	4.352143e+0	6.893156e-1	3	8	1.714286e-2	3.750000e-1	1	2	73	CpG_257,CpG_258,CpG_259	CpG_115,CpG_116,CpG_117,CpG_118,CpG_119,CpG_257,CpG_258,CpG_259	Bcas3	Bcas3,Rap1b
GO Biological Process	GO:2000108	positive regulation of leukocyte apoptotic process	469	2.546022e-2	1.000000e+0	6.980117e-1	4.352143e+0	6.893156e-1	3	8	1.714286e-2	3.750000e-1	1	2	32	CpG_40,CpG_41,CpG_42	CpG_1239,CpG_1240,CpG_1241,CpG_1242,CpG_1243,CpG_40,CpG_41,CpG_42	Tgfb2	Nr4a3,Tgfb2
GO Biological Process	GO:2000114	regulation of establishment of cell polarity	469	2.546022e-2	1.000000e+0	6.980117e-1	4.352143e+0	6.893156e-1	3	8	1.714286e-2	3.750000e-1	1	2	20	CpG_257,CpG_258,CpG_259	CpG_115,CpG_116,CpG_117,CpG_118,CpG_119,CpG_257,CpG_258,CpG_259	Bcas3	Bcas3,Rap1b
GO Biological Process	GO:0048818	positive regulation of hair follicle maturation	469	2.546022e-2	1.000000e+0	6.980117e-1	4.352143e+0	6.893156e-1	3	8	1.714286e-2	3.750000e-1	1	2	5	CpG_40,CpG_41,CpG_42	CpG_40,CpG_41,CpG_42,CpG_670,CpG_671,CpG_672,CpG_673,CpG_674	Tgfb2	Tgfb2,Wnt10b
GO Biological Process	GO:1903053	regulation of extracellular matrix organization	469	2.546022e-2	1.000000e+0	6.980117e-1	4.352143e+0	6.893156e-1	3	8	1.714286e-2	3.750000e-1	1	2	33	CpG_40,CpG_41,CpG_42	CpG_40,CpG_41,CpG_42,CpG_818,CpG_819,CpG_820,CpG_821,CpG_822	Tgfb2	Ddr1,Tgfb2
GO Biological Process	GO:0051170	nuclear import	469	2.546022e-2	1.000000e+0	6.980117e-1	4.352143e+0	6.893156e-1	3	8	1.714286e-2	3.750000e-1	1	2	127	CpG_40,CpG_41,CpG_42	CpG_1239,CpG_1240,CpG_1241,CpG_1242,CpG_1243,CpG_40,CpG_41,CpG_42	Tgfb2	Sec61b,Tgfb2
GO Biological Process	GO:0010715	regulation of extracellular matrix disassembly	469	2.546022e-2	1.000000e+0	6.980117e-1	4.352143e+0	6.893156e-1	3	8	1.714286e-2	3.750000e-1	1	2	15	CpG_40,CpG_41,CpG_42	CpG_40,CpG_41,CpG_42,CpG_818,CpG_819,CpG_820,CpG_821,CpG_822	Tgfb2	Ddr1,Tgfb2
GO Biological Process	GO:0010595	positive regulation of endothelial cell migration	469	2.546022e-2	1.000000e+0	6.980117e-1	4.352143e+0	6.893156e-1	3	8	1.714286e-2	3.750000e-1	1	2	74	CpG_257,CpG_258,CpG_259	CpG_257,CpG_258,CpG_259,CpG_902,CpG_903,CpG_904,CpG_905,CpG_906	Bcas3	Bcas3,Ccbe1
GO Biological Process	GO:0006606	protein import into nucleus	469	2.546022e-2	1.000000e+0	6.980117e-1	4.352143e+0	6.893156e-1	3	8	1.714286e-2	3.750000e-1	1	2	122	CpG_40,CpG_41,CpG_42	CpG_1239,CpG_1240,CpG_1241,CpG_1242,CpG_1243,CpG_40,CpG_41,CpG_42	Tgfb2	Sec61b,Tgfb2
GO Biological Process	GO:0032878	regulation of establishment or maintenance of cell polarity	469	2.546022e-2	1.000000e+0	6.980117e-1	4.352143e+0	6.893156e-1	3	8	1.714286e-2	3.750000e-1	1	2	24	CpG_257,CpG_258,CpG_259	CpG_115,CpG_116,CpG_117,CpG_118,CpG_119,CpG_257,CpG_258,CpG_259	Bcas3	Bcas3,Rap1b
GO Biological Process	GO:0042159	lipoprotein catabolic process	469	2.546022e-2	1.000000e+0	6.980117e-1	4.352143e+0	6.893156e-1	3	8	1.714286e-2	3.750000e-1	1	2	14	CpG_40,CpG_41,CpG_42	CpG_1595,CpG_1596,CpG_1597,CpG_1598,CpG_1599,CpG_40,CpG_41,CpG_42	Lyplal1	Apoe,Lyplal1
GO Biological Process	GO:0045445	myoblast differentiation	469	2.546022e-2	1.000000e+0	6.980117e-1	4.352143e+0	6.893156e-1	3	8	1.714286e-2	3.750000e-1	1	2	37	CpG_257,CpG_258,CpG_259	CpG_257,CpG_258,CpG_259,CpG_670,CpG_671,CpG_672,CpG_673,CpG_674	Tbx2	Tbx2,Wnt10b
GO Biological Process	GO:0006605	protein targeting	469	2.546022e-2	1.000000e+0	6.980117e-1	4.352143e+0	6.893156e-1	3	8	1.714286e-2	3.750000e-1	1	2	304	CpG_40,CpG_41,CpG_42	CpG_1239,CpG_1240,CpG_1241,CpG_1242,CpG_1243,CpG_40,CpG_41,CpG_42	Tgfb2	Sec61b,Tgfb2
GO Biological Process	GO:0048557	embryonic digestive tract morphogenesis	469	2.546022e-2	1.000000e+0	6.980117e-1	4.352143e+0	6.893156e-1	3	8	1.714286e-2	3.750000e-1	1	1	21	CpG_1972,CpG_1977,CpG_1978	CpG_1971,CpG_1972,CpG_1973,CpG_1974,CpG_1975,CpG_1976,CpG_1977,CpG_1978	Rbpms2	Rbpms2
GO Biological Process	GO:0048844	artery morphogenesis	486	2.645625e-2	1.000000e+0	6.999475e-1	2.321143e+0	3.015756e+0	7	35	4.000000e-2	2.000000e-1	3	7	64	CpG_1693,CpG_257,CpG_258,CpG_259,CpG_40,CpG_41,CpG_42	CpG_1068,CpG_1069,CpG_1070,CpG_1071,CpG_1072,CpG_1073,CpG_1074,CpG_1075,CpG_1076,CpG_1595,CpG_1596,CpG_1597,CpG_1598,CpG_1599,CpG_1688,CpG_1689,CpG_1690,CpG_1691,CpG_1692,CpG_1693,CpG_257,CpG_258,CpG_259,CpG_40,CpG_41,CpG_42,CpG_520,CpG_521,CpG_959,CpG_960,CpG_961,CpG_962,CpG_963,CpG_964,CpG_965	Tbx2,Tgfb2,Wnt11	Apoe,Dll4,Fgf8,Tbx2,Tgfb2,Wnt11,Zmiz1
GO Biological Process	GO:0032386	regulation of intracellular transport	487	2.674049e-2	1.000000e+0	7.060148e-1	1.630555e+0	1.042590e+1	17	121	9.714286e-2	1.404959e-1	8	18	501	CpG_1322,CpG_1433,CpG_1539,CpG_1540,CpG_1815,CpG_1816,CpG_1818,CpG_1820,CpG_1822,CpG_1824,CpG_1826,CpG_1828,CpG_2000,CpG_207,CpG_257,CpG_258,CpG_259	CpG_115,CpG_116,CpG_117,CpG_118,CpG_119,CpG_1222,CpG_1223,CpG_1224,CpG_1322,CpG_1323,CpG_1431,CpG_1432,CpG_1433,CpG_1434,CpG_1435,CpG_1436,CpG_1437,CpG_1438,CpG_1439,CpG_1469,CpG_1470,CpG_1539,CpG_1540,CpG_1541,CpG_1542,CpG_1543,CpG_1694,CpG_1695,CpG_1696,CpG_1697,CpG_1698,CpG_1699,CpG_1749,CpG_1750,CpG_1751,CpG_1752,CpG_1753,CpG_1754,CpG_1755,CpG_1756,CpG_1757,CpG_1773,CpG_1774,CpG_1775,CpG_1776…	Arf1,Atpif1,Bcas3,Gata2,Nol3,Sirt4,Wnt3a,Zic1	Arf1,Atpif1,Axin2,Bcas3,Cyld,Ddx58,Gata2,Kcne1,Nol3,Numa1,Rab3a,Rap1b,Rhot1,Sec16b,Sirt4,Stx1a,Wnt3a,Zic1
GO Biological Process	GO:0098732	macromolecule deacylation	488	2.924507e-2	1.000000e+0	7.705597e-1	2.763265e+0	1.809453e+0	5	21	2.857143e-2	2.380952e-1	3	4	65	CpG_1433,CpG_40,CpG_41,CpG_42,CpG_476	CpG_1431,CpG_1432,CpG_1433,CpG_1434,CpG_1435,CpG_1436,CpG_1437,CpG_1438,CpG_1439,CpG_40,CpG_41,CpG_42,CpG_475,CpG_476,CpG_477,CpG_478,CpG_897,CpG_898,CpG_899,CpG_900,CpG_901	Lyplal1,Rcor1,Sirt4	Lyplal1,Ndst1,Rcor1,Sirt4
GO Biological Process	GO:0035601	protein deacylation	488	2.924507e-2	1.000000e+0	7.705597e-1	2.763265e+0	1.809453e+0	5	21	2.857143e-2	2.380952e-1	3	4	61	CpG_1433,CpG_40,CpG_41,CpG_42,CpG_476	CpG_1431,CpG_1432,CpG_1433,CpG_1434,CpG_1435,CpG_1436,CpG_1437,CpG_1438,CpG_1439,CpG_40,CpG_41,CpG_42,CpG_475,CpG_476,CpG_477,CpG_478,CpG_897,CpG_898,CpG_899,CpG_900,CpG_901	Lyplal1,Rcor1,Sirt4	Lyplal1,Ndst1,Rcor1,Sirt4
GO Biological Process	GO:0034622	cellular macromolecular complex assembly	490	3.031425e-2	1.000000e+0	7.954707e-1	1.537181e+0	1.301083e+1	20	151	1.142857e-1	1.324503e-1	8	21	725	CpG_1360,CpG_1636,CpG_1637,CpG_1693,CpG_1815,CpG_1816,CpG_1818,CpG_1820,CpG_1822,CpG_1824,CpG_1826,CpG_1828,CpG_207,CpG_222,CpG_890,CpG_891,CpG_892,CpG_894,CpG_907,CpG_914	CpG_1180,CpG_1181,CpG_1182,CpG_1183,CpG_1184,CpG_1185,CpG_1186,CpG_1187,CpG_1188,CpG_1189,CpG_1190,CpG_1191,CpG_1192,CpG_1193,CpG_1194,CpG_1354,CpG_1355,CpG_1356,CpG_1357,CpG_1358,CpG_1359,CpG_1360,CpG_1469,CpG_1470,CpG_1635,CpG_1636,CpG_1637,CpG_165,CpG_166,CpG_167,CpG_168,CpG_1688,CpG_1689,CpG_169,CpG_1690,CpG_1691,CpG_1692,CpG_1693,CpG_170,CpG_171,CpG_1815,CpG_1816,CpG_1817,CpG_1818,CpG_1819,C…	Bin1,Gas7,Lsm14a,Mbd2,Nol3,Padi4,Uvrag,Wnt3a	Bin1,Coa6,Dnaaf2,Gas7,Hist2h2be,Lsm14a,Mbd2,Med6,Nol3,Npm1,Padi4,Pde4dip,Psmg1,Rpl38,Rps14,Stx1a,Taf1b,Tcap,Tubg2,Uvrag,Wnt3a
GO Biological Process	GO:0034248	regulation of cellular amide metabolic process	491	3.261852e-2	1.000000e+0	8.541933e-1	1.902576e+0	5.256032e+0	10	61	5.714286e-2	1.639344e-1	6	13	363	CpG_1360,CpG_1636,CpG_1637,CpG_1969,CpG_501,CpG_502,CpG_504,CpG_80,CpG_82,CpG_970	CpG_1222,CpG_1223,CpG_1224,CpG_1354,CpG_1355,CpG_1356,CpG_1357,CpG_1358,CpG_1359,CpG_1360,CpG_1453,CpG_1454,CpG_1455,CpG_1595,CpG_1596,CpG_1597,CpG_1598,CpG_1599,CpG_1635,CpG_1636,CpG_1637,CpG_165,CpG_166,CpG_167,CpG_168,CpG_169,CpG_170,CpG_171,CpG_1773,CpG_1774,CpG_1775,CpG_1776,CpG_1777,CpG_1965,CpG_1966,CpG_1967,CpG_1968,CpG_1969,CpG_1970,CpG_338,CpG_339,CpG_340,CpG_341,CpG_342,CpG_343,CpG_344…	Abca7,Dapk1,Lsm14a,Neurl1a,Padi6,Rplp1	Abca7,Aco1,Apoe,Dapk1,Lsm14a,Ncor2,Neurl1a,Nod2,Npm1,Padi6,Rpl38,Rplp1,Rps14
GO Biological Process	GO:0090257	regulation of muscle system process	492	3.407372e-2	1.000000e+0	8.904876e-1	1.970782e+0	4.566716e+0	9	53	5.142857e-2	1.698113e-1	2	7	200	CpG_1815,CpG_1816,CpG_1818,CpG_1820,CpG_1822,CpG_1824,CpG_1826,CpG_1828,CpG_766	CpG_1239,CpG_1240,CpG_1241,CpG_1242,CpG_1243,CpG_1518,CpG_1519,CpG_1520,CpG_1521,CpG_1617,CpG_1618,CpG_1619,CpG_1620,CpG_1621,CpG_1622,CpG_1623,CpG_1624,CpG_1663,CpG_1664,CpG_1665,CpG_1666,CpG_1667,CpG_1668,CpG_1669,CpG_1815,CpG_1816,CpG_1817,CpG_1818,CpG_1819,CpG_1820,CpG_1821,CpG_1822,CpG_1823,CpG_1824,CpG_1825,CpG_1826,CpG_1827,CpG_1828,CpG_1829,CpG_1830,CpG_1831,CpG_763,CpG_764,CpG_765,CpG_76…	Nol3,Sod1	Hspb6,Mef2a,Nol3,Nr4a3,Pi16,Sod1,Tacr1
GO Biological Process	GO:0050771	negative regulation of axonogenesis	493	3.417572e-2	1.000000e+0	8.913416e-1	3.094857e+0	1.292467e+0	4	15	2.285714e-2	2.666667e-1	2	3	45	CpG_161,CpG_162,CpG_164,CpG_207	CpG_161,CpG_162,CpG_163,CpG_164,CpG_1670,CpG_1671,CpG_203,CpG_204,CpG_205,CpG_206,CpG_207,CpG_208,CpG_209,CpG_210,CpG_211	Bcl11a,Wnt3a	Bcl11a,Rgma,Wnt3a
GO Biological Process	GO:0034440	lipid oxidation	493	3.417572e-2	1.000000e+0	8.913416e-1	3.094857e+0	1.292467e+0	4	15	2.285714e-2	2.666667e-1	1	2	71	CpG_1640,CpG_1641,CpG_1642,CpG_1644	CpG_1640,CpG_1641,CpG_1642,CpG_1643,CpG_1644,CpG_529,CpG_530,CpG_531,CpG_532,CpG_533,CpG_534,CpG_535,CpG_536,CpG_537,CpG_538	Cpt1c	Cpt1c,Hacl1
GO Biological Process	GO:0002718	regulation of cytokine production involved in immune response	493	3.417572e-2	1.000000e+0	8.913416e-1	3.094857e+0	1.292467e+0	4	15	2.285714e-2	2.666667e-1	2	3	65	CpG_262,CpG_40,CpG_41,CpG_42	CpG_1239,CpG_1240,CpG_1241,CpG_1242,CpG_1243,CpG_262,CpG_263,CpG_264,CpG_265,CpG_266,CpG_267,CpG_268,CpG_40,CpG_41,CpG_42	Tbx21,Tgfb2	Nr4a3,Tbx21,Tgfb2
GO Biological Process	GO:0019395	fatty acid oxidation	493	3.417572e-2	1.000000e+0	8.913416e-1	3.094857e+0	1.292467e+0	4	15	2.285714e-2	2.666667e-1	1	2	70	CpG_1640,CpG_1641,CpG_1642,CpG_1644	CpG_1640,CpG_1641,CpG_1642,CpG_1643,CpG_1644,CpG_529,CpG_530,CpG_531,CpG_532,CpG_533,CpG_534,CpG_535,CpG_536,CpG_537,CpG_538	Cpt1c	Cpt1c,Hacl1
GO Biological Process	GO:0051058	negative regulation of small GTPase mediated signal transduction	497	3.581320e-2	1.000000e+0	9.265314e-1	3.868571e+0	7.754801e-1	3	9	1.714286e-2	3.333333e-1	1	2	56	CpG_40,CpG_41,CpG_42	CpG_40,CpG_41,CpG_42,CpG_614,CpG_615,CpG_616,CpG_617,CpG_618,CpG_619	Tgfb2	Sh3bp1,Tgfb2
GO Biological Process	GO:0045683	negative regulation of epidermis development	497	3.581320e-2	1.000000e+0	9.265314e-1	3.868571e+0	7.754801e-1	3	9	1.714286e-2	3.333333e-1	1	2	21	CpG_40,CpG_41,CpG_42	CpG_1564,CpG_1565,CpG_1566,CpG_1567,CpG_1568,CpG_1569,CpG_40,CpG_41,CpG_42	Tgfb2	Gdf3,Tgfb2
GO Biological Process	GO:0060395	SMAD protein signal transduction	497	3.581320e-2	1.000000e+0	9.265314e-1	3.868571e+0	7.754801e-1	3	9	1.714286e-2	3.333333e-1	1	2	66	CpG_40,CpG_41,CpG_42	CpG_1564,CpG_1565,CpG_1566,CpG_1567,CpG_1568,CpG_1569,CpG_40,CpG_41,CpG_42	Tgfb2	Gdf3,Tgfb2
GO Biological Process	GO:0071346	cellular response to interferon-gamma	497	3.581320e-2	1.000000e+0	9.265314e-1	3.868571e+0	7.754801e-1	3	9	1.714286e-2	3.333333e-1	1	2	69	CpG_501,CpG_502,CpG_504	CpG_500,CpG_501,CpG_502,CpG_503,CpG_504,CpG_689,CpG_690,CpG_691,CpG_692	Dapk1	Ciita,Dapk1
GO Cellular Component	GO:0031252	cell leading edge	1	2.168656e-5	3.541415e-2	3.541415e-2	2.989351e+0	5.686854e+0	17	66	9.714286e-2	2.575758e-1	7	12	364	CpG_1471,CpG_1473,CpG_1475,CpG_1477,CpG_1478,CpG_1492,CpG_1493,CpG_1495,CpG_1496,CpG_1497,CpG_207,CpG_222,CpG_257,CpG_258,CpG_259,CpG_80,CpG_82	CpG_1222,CpG_1223,CpG_1224,CpG_1471,CpG_1472,CpG_1473,CpG_1474,CpG_1475,CpG_1476,CpG_1477,CpG_1478,CpG_1492,CpG_1493,CpG_1494,CpG_1495,CpG_1496,CpG_1497,CpG_1498,CpG_1499,CpG_1500,CpG_1501,CpG_1544,CpG_1545,CpG_1546,CpG_1547,CpG_1548,CpG_203,CpG_204,CpG_205,CpG_206,CpG_207,CpG_208,CpG_209,CpG_210,CpG_211,CpG_218,CpG_219,CpG_220,CpG_221,CpG_222,CpG_223,CpG_257,CpG_258,CpG_259,CpG_345,CpG_346,CpG_3…	Abca7,Arf1,Arhgap45,Bcas3,Gas7,Mkln1,Wasf3	Abca7,Arf1,Arhgap45,Bcas3,Ddx58,Fgd5,Gas7,Itgb4,Mkln1,Robo1,Sh3bp1,Wasf3
GO Cellular Component	GO:0060987	lipid tube	2	2.490175e-4	4.066456e-1	2.033228e-1	9.284571e+0	4.308223e-1	4	5	2.285714e-2	8.000000e-1	1	1	1	CpG_890,CpG_891,CpG_892,CpG_894	CpG_890,CpG_891,CpG_892,CpG_893,CpG_894	Bin1	Bin1
GO Cellular Component	GO:0043194	axon initial segment	2	2.490175e-4	4.066456e-1	2.033228e-1	9.284571e+0	4.308223e-1	4	5	2.285714e-2	8.000000e-1	1	1	11	CpG_890,CpG_891,CpG_892,CpG_894	CpG_890,CpG_891,CpG_892,CpG_893,CpG_894	Bin1	Bin1
GO Cellular Component	GO:0033268	node of Ranvier	2	2.490175e-4	4.066456e-1	2.033228e-1	9.284571e+0	4.308223e-1	4	5	2.285714e-2	8.000000e-1	1	1	14	CpG_890,CpG_891,CpG_892,CpG_894	CpG_890,CpG_891,CpG_892,CpG_893,CpG_894	Bin1	Bin1
GO Cellular Component	GO:0032281	AMPA glutamate receptor complex	2	2.490175e-4	4.066456e-1	2.033228e-1	9.284571e+0	4.308223e-1	4	5	2.285714e-2	8.000000e-1	1	1	30	CpG_1640,CpG_1641,CpG_1642,CpG_1644	CpG_1640,CpG_1641,CpG_1642,CpG_1643,CpG_1644	Cpt1c	Cpt1c
GO Cellular Component	GO:0016529	sarcoplasmic reticulum	6	4.114800e-4	6.719468e-1	1.119911e-1	4.036770e+0	1.981782e+0	8	23	4.571429e-2	3.478261e-1	1	2	60	CpG_1815,CpG_1816,CpG_1818,CpG_1820,CpG_1822,CpG_1824,CpG_1826,CpG_1828	CpG_1587,CpG_1588,CpG_1589,CpG_1590,CpG_1591,CpG_1592,CpG_1815,CpG_1816,CpG_1817,CpG_1818,CpG_1819,CpG_1820,CpG_1821,CpG_1822,CpG_1823,CpG_1824,CpG_1825,CpG_1826,CpG_1827,CpG_1828,CpG_1829,CpG_1830,CpG_1831	Nol3	Nol3,Rtn2
GO Cellular Component	GO:0016528	sarcoplasm	6	4.114800e-4	6.719468e-1	1.119911e-1	4.036770e+0	1.981782e+0	8	23	4.571429e-2	3.478261e-1	1	2	70	CpG_1815,CpG_1816,CpG_1818,CpG_1820,CpG_1822,CpG_1824,CpG_1826,CpG_1828	CpG_1587,CpG_1588,CpG_1589,CpG_1590,CpG_1591,CpG_1592,CpG_1815,CpG_1816,CpG_1817,CpG_1818,CpG_1819,CpG_1820,CpG_1821,CpG_1822,CpG_1823,CpG_1824,CpG_1825,CpG_1826,CpG_1827,CpG_1828,CpG_1829,CpG_1830,CpG_1831	Nol3	Nol3,Rtn2
GO Cellular Component	GO:0035327	transcriptionally active chromatin	8	6.297170e-4	1.000000e+0	1.285410e-1	1.160571e+1	2.584934e-1	3	3	1.714286e-2	1.000000e+0	1	1	23	CpG_257,CpG_258,CpG_259	CpG_257,CpG_258,CpG_259	Bcas3	Bcas3
GO Cellular Component	GO:0005814	centriole	9	1.284774e-3	1.000000e+0	2.331151e-1	3.868571e+0	1.809453e+0	7	21	4.000000e-2	3.333333e-1	2	4	121	CpG_147,CpG_148,CpG_149,CpG_1640,CpG_1641,CpG_1642,CpG_1644	CpG_115,CpG_116,CpG_117,CpG_118,CpG_119,CpG_147,CpG_148,CpG_149,CpG_1640,CpG_1641,CpG_1642,CpG_1643,CpG_1644,CpG_512,CpG_513,CpG_514,CpG_515,CpG_516,CpG_517,CpG_518,CpG_519	Sfi1,Tsks	Kif2a,Mdm1,Sfi1,Tsks
GO Cellular Component	GO:0036117	hyaluranon cable	10	1.516645e-3	1.000000e+0	2.476681e-1	6.631837e+0	6.031512e-1	4	7	2.285714e-2	5.714286e-1	1	1	2	CpG_1840,CpG_1841,CpG_1842,CpG_1843	CpG_1839,CpG_1840,CpG_1841,CpG_1842,CpG_1843,CpG_1844,CpG_1845	Has3	Has3
GO Cellular Component	GO:0008328	ionotropic glutamate receptor complex	11	2.830212e-3	1.000000e+0	4.201578e-1	5.802857e+0	6.893156e-1	4	8	2.285714e-2	5.000000e-1	1	2	50	CpG_1640,CpG_1641,CpG_1642,CpG_1644	CpG_1640,CpG_1641,CpG_1642,CpG_1643,CpG_1644,CpG_760,CpG_761,CpG_762	Cpt1c	Cpt1c,Grik1
GO Cellular Component	GO:0030027	lamellipodium	12	4.720764e-3	1.000000e+0	6.424173e-1	4.144898e+0	1.206302e+0	5	14	2.857143e-2	3.571429e-1	1	2	177	CpG_1471,CpG_1473,CpG_1475,CpG_1477,CpG_1478	CpG_1471,CpG_1472,CpG_1473,CpG_1474,CpG_1475,CpG_1476,CpG_1477,CpG_1478,CpG_614,CpG_615,CpG_616,CpG_617,CpG_618,CpG_619	Wasf3	Sh3bp1,Wasf3
GO Cellular Component	GO:0001726	ruffle	13	5.496794e-3	1.000000e+0	6.904819e-1	2.813506e+0	2.843427e+0	8	33	4.571429e-2	2.424242e-1	4	7	163	CpG_1492,CpG_1493,CpG_1495,CpG_1496,CpG_1497,CpG_222,CpG_80,CpG_82	CpG_1222,CpG_1223,CpG_1224,CpG_1492,CpG_1493,CpG_1494,CpG_1495,CpG_1496,CpG_1497,CpG_1498,CpG_1499,CpG_1500,CpG_1501,CpG_1544,CpG_1545,CpG_1546,CpG_1547,CpG_1548,CpG_218,CpG_219,CpG_220,CpG_221,CpG_222,CpG_223,CpG_614,CpG_615,CpG_616,CpG_617,CpG_618,CpG_619,CpG_80,CpG_81,CpG_82	Abca7,Arhgap45,Gas7,Mkln1	Abca7,Arhgap45,Ddx58,Fgd5,Gas7,Mkln1,Sh3bp1
GO Cellular Component	GO:0098589	membrane region	14	7.787850e-3	1.000000e+0	9.083971e-1	2.901429e+0	2.412605e+0	7	28	4.000000e-2	2.500000e-1	2	7	382	CpG_1143,CpG_1144,CpG_1145,CpG_1146,CpG_1147,CpG_1149,CpG_260	CpG_1141,CpG_1142,CpG_1143,CpG_1144,CpG_1145,CpG_1146,CpG_1147,CpG_1148,CpG_1149,CpG_1453,CpG_1454,CpG_1455,CpG_260,CpG_261,CpG_31,CpG_32,CpG_33,CpG_34,CpG_767,CpG_768,CpG_769,CpG_770,CpG_771,CpG_853,CpG_854,CpG_855,CpG_856,CpG_857	Epn3,Stoml3	Epn3,Kcne1,Ptprc,Rftn1,Scarb1,Stoml3,Tbc1d5
GO Cellular Component	GO:0005776	autophagosome	15	8.706945e-3	1.000000e+0	9.478961e-1	3.165195e+0	1.895618e+0	6	22	3.428571e-2	2.727273e-1	3	4	88	CpG_184,CpG_262,CpG_983,CpG_985,CpG_986,CpG_987	CpG_184,CpG_185,CpG_186,CpG_187,CpG_188,CpG_189,CpG_262,CpG_263,CpG_264,CpG_265,CpG_266,CpG_267,CpG_268,CpG_856,CpG_857,CpG_983,CpG_984,CpG_985,CpG_986,CpG_987,CpG_988,CpG_989	Irgm1,Osbpl7,Pip4k2a	Irgm1,Osbpl7,Pip4k2a,Tbc1d5
GO Cellular Component	GO:0005811	lipid particle	16	8.933871e-3	1.000000e+0	9.118132e-1	3.626786e+0	1.378631e+0	5	16	2.857143e-2	3.125000e-1	1	3	67	CpG_861,CpG_862,CpG_863,CpG_864,CpG_865	CpG_115,CpG_116,CpG_117,CpG_118,CpG_119,CpG_2029,CpG_2030,CpG_2031,CpG_858,CpG_859,CpG_860,CpG_861,CpG_862,CpG_863,CpG_864,CpG_865	Plin4	Abhd5,Plin4,Rap1b
GO Cellular Component	GO:0042175	nuclear outer membrane-endoplasmic reticulum membrane network	17	9.118044e-3	1.000000e+0	8.758686e-1	1.826825e+0	9.305761e+0	17	108	9.714286e-2	1.574074e-1	7	20	898	CpG_1307,CpG_1308,CpG_1309,CpG_1539,CpG_1540,CpG_1640,CpG_1641,CpG_1642,CpG_1644,CpG_1660,CpG_184,CpG_27,CpG_838,CpG_840,CpG_842,CpG_845,CpG_847	CpG_1029,CpG_1030,CpG_1031,CpG_1032,CpG_1033,CpG_1034,CpG_1035,CpG_1036,CpG_1037,CpG_1038,CpG_1039,CpG_1040,CpG_1041,CpG_1042,CpG_1043,CpG_1044,CpG_1045,CpG_1046,CpG_1239,CpG_1240,CpG_1241,CpG_1242,CpG_1243,CpG_1307,CpG_1308,CpG_1309,CpG_1384,CpG_1385,CpG_1386,CpG_1387,CpG_1388,CpG_1389,CpG_1390,CpG_1391,CpG_1518,CpG_1519,CpG_1520,CpG_1521,CpG_1539,CpG_1540,CpG_1541,CpG_1542,CpG_1543,CpG_1587,CpG…	Atp10a,Cpt1c,Dnajb2,Faah,Irgm1,Mymx,Rpn1	Atp10a,Cpt1c,Disp3,Dnajb2,Eva1a,Faah,Fam69c,Gm6169,Irgm1,Lman1,Lnpk,Mmp23,Mymx,Reep3,Rpn1,Rtn2,Sec16b,Sec61b,Stard3,Ubiad1
GO Cellular Component	GO:0005789	endoplasmic reticulum membrane	17	9.118044e-3	1.000000e+0	8.758686e-1	1.826825e+0	9.305761e+0	17	108	9.714286e-2	1.574074e-1	7	20	878	CpG_1307,CpG_1308,CpG_1309,CpG_1539,CpG_1540,CpG_1640,CpG_1641,CpG_1642,CpG_1644,CpG_1660,CpG_184,CpG_27,CpG_838,CpG_840,CpG_842,CpG_845,CpG_847	CpG_1029,CpG_1030,CpG_1031,CpG_1032,CpG_1033,CpG_1034,CpG_1035,CpG_1036,CpG_1037,CpG_1038,CpG_1039,CpG_1040,CpG_1041,CpG_1042,CpG_1043,CpG_1044,CpG_1045,CpG_1046,CpG_1239,CpG_1240,CpG_1241,CpG_1242,CpG_1243,CpG_1307,CpG_1308,CpG_1309,CpG_1384,CpG_1385,CpG_1386,CpG_1387,CpG_1388,CpG_1389,CpG_1390,CpG_1391,CpG_1518,CpG_1519,CpG_1520,CpG_1521,CpG_1539,CpG_1540,CpG_1541,CpG_1542,CpG_1543,CpG_1587,CpG…	Atp10a,Cpt1c,Dnajb2,Faah,Irgm1,Mymx,Rpn1	Atp10a,Cpt1c,Disp3,Dnajb2,Eva1a,Faah,Fam69c,Gm6169,Irgm1,Lman1,Lnpk,Mmp23,Mymx,Reep3,Rpn1,Rtn2,Sec16b,Sec61b,Stard3,Ubiad1
GO Cellular Component	GO:0030424	axon	19	1.209323e-2	1.000000e+0	1.000000e+0	1.740857e+0	1.033973e+1	18	120	1.028571e-1	1.500000e-1	7	16	433	CpG_1640,CpG_1641,CpG_1642,CpG_1644,CpG_1866,CpG_27,CpG_282,CpG_283,CpG_287,CpG_289,CpG_40,CpG_41,CpG_42,CpG_766,CpG_890,CpG_891,CpG_892,CpG_894	CpG_1000,CpG_1001,CpG_1002,CpG_1003,CpG_1004,CpG_1005,CpG_1056,CpG_1057,CpG_1058,CpG_1469,CpG_1470,CpG_1593,CpG_1594,CpG_1640,CpG_1641,CpG_1642,CpG_1643,CpG_1644,CpG_1749,CpG_1750,CpG_1751,CpG_1752,CpG_1753,CpG_1754,CpG_1755,CpG_1756,CpG_1757,CpG_1778,CpG_1779,CpG_1780,CpG_1781,CpG_1782,CpG_1783,CpG_1784,CpG_1856,CpG_1857,CpG_1858,CpG_1859,CpG_1860,CpG_1861,CpG_1862,CpG_1863,CpG_1864,CpG_1865,CpG…	Bin1,Calb2,Cpt1c,Ptprn,Sod1,Srcin1,Tgfb2	Bdnf,Bin1,Bloc1s3,Cadm1,Calb2,Cpt1c,Irx3,Ntng2,Ptprn,Rab3a,Robo1,Sod1,Srcin1,Stx1a,Tgfb2,Trpv2
GO Cellular Component	GO:0045121	membrane raft	20	1.358796e-2	1.000000e+0	1.000000e+0	2.901429e+0	2.067947e+0	6	24	3.428571e-2	2.500000e-1	1	5	308	CpG_1143,CpG_1144,CpG_1145,CpG_1146,CpG_1147,CpG_1149	CpG_1141,CpG_1142,CpG_1143,CpG_1144,CpG_1145,CpG_1146,CpG_1147,CpG_1148,CpG_1149,CpG_1453,CpG_1454,CpG_1455,CpG_31,CpG_32,CpG_33,CpG_34,CpG_767,CpG_768,CpG_769,CpG_770,CpG_771,CpG_853,CpG_854,CpG_855	Stoml3	Kcne1,Ptprc,Rftn1,Scarb1,Stoml3
GO Cellular Component	GO:0042383	sarcolemma	21	2.050643e-2	1.000000e+0	1.000000e+0	3.570989e+0	1.120138e+0	4	13	2.285714e-2	3.076923e-1	1	3	121	CpG_890,CpG_891,CpG_892,CpG_894	CpG_1587,CpG_1588,CpG_1589,CpG_1590,CpG_1591,CpG_1592,CpG_890,CpG_891,CpG_892,CpG_893,CpG_894,CpG_895,CpG_896	Bin1	Bin1,Kcnn2,Rtn2
GO Cellular Component	GO:0035098	ESC/E(Z) complex	21	2.050643e-2	1.000000e+0	1.000000e+0	3.570989e+0	1.120138e+0	4	13	2.285714e-2	3.076923e-1	1	1	18	CpG_282,CpG_283,CpG_287,CpG_289	CpG_280,CpG_281,CpG_282,CpG_283,CpG_284,CpG_285,CpG_286,CpG_287,CpG_288,CpG_289,CpG_290,CpG_291,CpG_292	Epop	Epop
GO Cellular Component	GO:0030315	T-tubule	21	2.050643e-2	1.000000e+0	1.000000e+0	3.570989e+0	1.120138e+0	4	13	2.285714e-2	3.076923e-1	1	3	45	CpG_890,CpG_891,CpG_892,CpG_894	CpG_1587,CpG_1588,CpG_1589,CpG_1590,CpG_1591,CpG_1592,CpG_890,CpG_891,CpG_892,CpG_893,CpG_894,CpG_895,CpG_896	Bin1	Bin1,Kcnn2,Rtn2
GO Cellular Component	GO:0010494	cytoplasmic stress granule	24	2.089714e-2	1.000000e+0	1.000000e+0	7.737143e+0	2.584934e-1	2	3	1.142857e-2	6.666667e-1	1	1	44	CpG_1636,CpG_1637	CpG_1635,CpG_1636,CpG_1637	Lsm14a	Lsm14a
GO Cellular Component	GO:0000932	P-body	24	2.089714e-2	1.000000e+0	1.000000e+0	7.737143e+0	2.584934e-1	2	3	1.142857e-2	6.666667e-1	1	1	79	CpG_1636,CpG_1637	CpG_1635,CpG_1636,CpG_1637	Lsm14a	Lsm14a
GO Cellular Component	GO:0044450	microtubule organizing center part	26	2.645625e-2	1.000000e+0	1.000000e+0	2.321143e+0	3.015756e+0	7	35	4.000000e-2	2.000000e-1	2	6	163	CpG_147,CpG_148,CpG_149,CpG_1640,CpG_1641,CpG_1642,CpG_1644	CpG_115,CpG_116,CpG_117,CpG_118,CpG_119,CpG_147,CpG_148,CpG_149,CpG_1640,CpG_1641,CpG_1642,CpG_1643,CpG_1644,CpG_308,CpG_309,CpG_310,CpG_311,CpG_312,CpG_313,CpG_314,CpG_512,CpG_513,CpG_514,CpG_515,CpG_516,CpG_517,CpG_518,CpG_519,CpG_582,CpG_583,CpG_584,CpG_585,CpG_586,CpG_587,CpG_588	Sfi1,Tsks	Kif2a,Mdm1,Pibf1,Sfi1,Tsks,Tubg2
GO Cellular Component	GO:0098802	plasma membrane receptor complex	27	3.417572e-2	1.000000e+0	1.000000e+0	3.094857e+0	1.292467e+0	4	15	2.285714e-2	2.666667e-1	1	3	169	CpG_1640,CpG_1641,CpG_1642,CpG_1644	CpG_1640,CpG_1641,CpG_1642,CpG_1643,CpG_1644,CpG_345,CpG_346,CpG_347,CpG_348,CpG_349,CpG_350,CpG_351,CpG_760,CpG_761,CpG_762	Cpt1c	Cpt1c,Grik1,Itgb4
GO Cellular Component	GO:0031674	I band	27	3.417572e-2	1.000000e+0	1.000000e+0	3.094857e+0	1.292467e+0	4	15	2.285714e-2	2.666667e-1	1	4	141	CpG_890,CpG_891,CpG_892,CpG_894	CpG_293,CpG_294,CpG_295,CpG_767,CpG_768,CpG_769,CpG_770,CpG_771,CpG_890,CpG_891,CpG_892,CpG_893,CpG_894,CpG_895,CpG_896	Bin1	Bin1,Kcne1,Kcnn2,Tcap
GO Cellular Component	GO:0030018	Z disc	27	3.417572e-2	1.000000e+0	1.000000e+0	3.094857e+0	1.292467e+0	4	15	2.285714e-2	2.666667e-1	1	4	125	CpG_890,CpG_891,CpG_892,CpG_894	CpG_293,CpG_294,CpG_295,CpG_767,CpG_768,CpG_769,CpG_770,CpG_771,CpG_890,CpG_891,CpG_892,CpG_893,CpG_894,CpG_895,CpG_896	Bin1	Bin1,Kcne1,Kcnn2,Tcap
GO Cellular Component	GO:0000788	nuclear nucleosome	30	3.943563e-2	1.000000e+0	1.000000e+0	5.802857e+0	3.446578e-1	2	4	1.142857e-2	5.000000e-1	1	1	41	CpG_21,CpG_22	CpG_19,CpG_20,CpG_21,CpG_22	Tnp1	Tnp1
GO Cellular Component	GO:0099568	cytoplasmic region	31	4.406565e-2	1.000000e+0	1.000000e+0	1.975441e+0	4.049729e+0	8	47	4.571429e-2	1.702128e-1	4	10	331	CpG_1492,CpG_1493,CpG_1495,CpG_1496,CpG_1497,CpG_260,CpG_484,CpG_766	CpG_1492,CpG_1493,CpG_1494,CpG_1495,CpG_1496,CpG_1497,CpG_1498,CpG_1499,CpG_1500,CpG_1501,CpG_1593,CpG_1594,CpG_1694,CpG_1695,CpG_1696,CpG_1697,CpG_1698,CpG_1699,CpG_1832,CpG_1833,CpG_1834,CpG_1835,CpG_1836,CpG_1837,CpG_1838,CpG_260,CpG_261,CpG_355,CpG_356,CpG_357,CpG_479,CpG_480,CpG_481,CpG_482,CpG_483,CpG_484,CpG_485,CpG_614,CpG_615,CpG_616,CpG_617,CpG_618,CpG_619,CpG_763,CpG_764,CpG_765,CpG_766	Epn3,Mkln1,Sod1,Tnfaip2	Bloc1s3,Epn3,Exoc3l,Exoc3l2,Mkln1,Numa1,Sept9,Sh3bp1,Sod1,Tnfaip2
GO Cellular Component	GO:0036477	somatodendritic compartment	32	4.459383e-2	1.000000e+0	1.000000e+0	1.513789e+0	1.189069e+1	18	138	1.028571e-1	1.304348e-1	10	22	710	CpG_1640,CpG_1641,CpG_1642,CpG_1644,CpG_222,CpG_262,CpG_27,CpG_282,CpG_283,CpG_287,CpG_289,CpG_40,CpG_41,CpG_42,CpG_640,CpG_766,CpG_84,CpG_970	CpG_1056,CpG_1057,CpG_1058,CpG_1335,CpG_1336,CpG_1337,CpG_1338,CpG_1339,CpG_1340,CpG_1518,CpG_1519,CpG_1520,CpG_1521,CpG_1640,CpG_1641,CpG_1642,CpG_1643,CpG_1644,CpG_1645,CpG_1646,CpG_1647,CpG_1648,CpG_1649,CpG_1650,CpG_1651,CpG_1652,CpG_1653,CpG_1654,CpG_1655,CpG_1656,CpG_1657,CpG_1658,CpG_1694,CpG_1695,CpG_1696,CpG_1697,CpG_1698,CpG_1699,CpG_1941,CpG_1942,CpG_1943,CpG_1944,CpG_1945,CpG_1946,CpG…	Atxn10,Cpt1c,Efna2,Neurl1a,Ptprn,Rcvrn,Sod1,Srcin1,Tbx21,Tgfb2	Atxn10,Bdnf,Brinp2,Btd,Cadm1,Camk2n1,Cpt1c,Efna2,Gabra5,Grik1,Kcnn2,Neurl1a,Nrsn1,Numa1,Prr7,Ptprn,Rcvrn,Sod1,Srcin1,Tacr1,Tbx21,Tgfb2
GO Cellular Component	GO:0036452	ESCRT complex	33	6.204400e-2	1.000000e+0	1.000000e+0	4.642286e+0	4.308223e-1	2	5	1.142857e-2	4.000000e-1	1	1	24	CpG_949,CpG_953	CpG_949,CpG_950,CpG_951,CpG_952,CpG_953	Vps37c	Vps37c
GO Cellular Component	GO:0008250	oligosaccharyltransferase complex	33	6.204400e-2	1.000000e+0	1.000000e+0	4.642286e+0	4.308223e-1	2	5	1.142857e-2	4.000000e-1	1	1	12	CpG_1539,CpG_1540	CpG_1539,CpG_1540,CpG_1541,CpG_1542,CpG_1543	Rpn1	Rpn1
GO Cellular Component	GO:0000813	ESCRT I complex	33	6.204400e-2	1.000000e+0	1.000000e+0	4.642286e+0	4.308223e-1	2	5	1.142857e-2	4.000000e-1	1	1	10	CpG_949,CpG_953	CpG_949,CpG_950,CpG_951,CpG_952,CpG_953	Vps37c	Vps37c
GO Cellular Component	GO:0005938	cell cortex	36	7.094684e-2	1.000000e+0	1.000000e+0	1.889302e+0	3.705071e+0	7	43	4.000000e-2	1.627907e-1	3	8	271	CpG_1492,CpG_1493,CpG_1495,CpG_1496,CpG_1497,CpG_260,CpG_484	CpG_1492,CpG_1493,CpG_1494,CpG_1495,CpG_1496,CpG_1497,CpG_1498,CpG_1499,CpG_1500,CpG_1501,CpG_1593,CpG_1594,CpG_1694,CpG_1695,CpG_1696,CpG_1697,CpG_1698,CpG_1699,CpG_1832,CpG_1833,CpG_1834,CpG_1835,CpG_1836,CpG_1837,CpG_1838,CpG_260,CpG_261,CpG_355,CpG_356,CpG_357,CpG_479,CpG_480,CpG_481,CpG_482,CpG_483,CpG_484,CpG_485,CpG_614,CpG_615,CpG_616,CpG_617,CpG_618,CpG_619	Epn3,Mkln1,Tnfaip2	Epn3,Exoc3l,Exoc3l2,Mkln1,Numa1,Sept9,Sh3bp1,Tnfaip2
GO Cellular Component	GO:0031968	organelle outer membrane	37	7.457865e-2	1.000000e+0	1.000000e+0	1.989551e+0	3.015756e+0	6	35	3.428571e-2	1.714286e-1	2	5	187	CpG_1014,CpG_1023,CpG_1640,CpG_1641,CpG_1642,CpG_1644	CpG_1014,CpG_1015,CpG_1016,CpG_1017,CpG_1018,CpG_1019,CpG_1020,CpG_1021,CpG_1022,CpG_1023,CpG_1640,CpG_1641,CpG_1642,CpG_1643,CpG_1644,CpG_1735,CpG_1736,CpG_1737,CpG_240,CpG_241,CpG_242,CpG_243,CpG_244,CpG_245,CpG_246,CpG_247,CpG_248,CpG_249,CpG_250,CpG_251,CpG_252,CpG_65,CpG_66,CpG_67,CpG_68	Cpt1c,Cstad	Cisd1,Cpt1c,Cstad,Rhot1,Vdac3
GO Cellular Component	GO:0005741	mitochondrial outer membrane	37	7.457865e-2	1.000000e+0	1.000000e+0	1.989551e+0	3.015756e+0	6	35	3.428571e-2	1.714286e-1	2	5	165	CpG_1014,CpG_1023,CpG_1640,CpG_1641,CpG_1642,CpG_1644	CpG_1014,CpG_1015,CpG_1016,CpG_1017,CpG_1018,CpG_1019,CpG_1020,CpG_1021,CpG_1022,CpG_1023,CpG_1640,CpG_1641,CpG_1642,CpG_1643,CpG_1644,CpG_1735,CpG_1736,CpG_1737,CpG_240,CpG_241,CpG_242,CpG_243,CpG_244,CpG_245,CpG_246,CpG_247,CpG_248,CpG_249,CpG_250,CpG_251,CpG_252,CpG_65,CpG_66,CpG_67,CpG_68	Cpt1c,Cstad	Cisd1,Cpt1c,Cstad,Rhot1,Vdac3
GO Cellular Component	GO:0045111	intermediate filament cytoskeleton	39	8.672437e-2	1.000000e+0	1.000000e+0	2.321143e+0	1.723289e+0	4	20	2.285714e-2	2.000000e-1	2	5	238	CpG_1360,CpG_257,CpG_258,CpG_259	CpG_1341,CpG_1342,CpG_1343,CpG_1344,CpG_1345,CpG_1346,CpG_1347,CpG_1354,CpG_1355,CpG_1356,CpG_1357,CpG_1358,CpG_1359,CpG_1360,CpG_1869,CpG_1870,CpG_1871,CpG_257,CpG_258,CpG_259	Bcas3,Padi6	Bcas3,Gm21969,Iffo2,Padi6,Syce1l
GO Cellular Component	GO:0070449	elongin complex	39	8.672437e-2	1.000000e+0	1.000000e+0	2.321143e+0	1.723289e+0	4	20	2.285714e-2	2.000000e-1	1	2	5	CpG_282,CpG_283,CpG_287,CpG_289	CpG_1,CpG_2,CpG_280,CpG_281,CpG_282,CpG_283,CpG_284,CpG_285,CpG_286,CpG_287,CpG_288,CpG_289,CpG_290,CpG_291,CpG_292,CpG_3,CpG_4,CpG_5,CpG_6,CpG_7	Epop	Eloc,Epop
GO Cellular Component	GO:0035097	histone methyltransferase complex	39	8.672437e-2	1.000000e+0	1.000000e+0	2.321143e+0	1.723289e+0	4	20	2.285714e-2	2.000000e-1	1	2	73	CpG_282,CpG_283,CpG_287,CpG_289	CpG_1446,CpG_1447,CpG_1448,CpG_1449,CpG_1450,CpG_1451,CpG_1452,CpG_280,CpG_281,CpG_282,CpG_283,CpG_284,CpG_285,CpG_286,CpG_287,CpG_288,CpG_289,CpG_290,CpG_291,CpG_292	Epop	Epop,Setd1b
GO Cellular Component	GO:0008023	transcription elongation factor complex	39	8.672437e-2	1.000000e+0	1.000000e+0	2.321143e+0	1.723289e+0	4	20	2.285714e-2	2.000000e-1	1	2	52	CpG_282,CpG_283,CpG_287,CpG_289	CpG_1,CpG_2,CpG_280,CpG_281,CpG_282,CpG_283,CpG_284,CpG_285,CpG_286,CpG_287,CpG_288,CpG_289,CpG_290,CpG_291,CpG_292,CpG_3,CpG_4,CpG_5,CpG_6,CpG_7	Epop	Eloc,Epop
GO Cellular Component	GO:0034708	methyltransferase complex	39	8.672437e-2	1.000000e+0	1.000000e+0	2.321143e+0	1.723289e+0	4	20	2.285714e-2	2.000000e-1	1	2	96	CpG_282,CpG_283,CpG_287,CpG_289	CpG_1446,CpG_1447,CpG_1448,CpG_1449,CpG_1450,CpG_1451,CpG_1452,CpG_280,CpG_281,CpG_282,CpG_283,CpG_284,CpG_285,CpG_286,CpG_287,CpG_288,CpG_289,CpG_290,CpG_291,CpG_292	Epop	Epop,Setd1b
GO Cellular Component	GO:0032994	protein-lipid complex	39	8.672437e-2	1.000000e+0	1.000000e+0	2.321143e+0	1.723289e+0	4	20	2.285714e-2	2.000000e-1	1	3	39	CpG_890,CpG_891,CpG_892,CpG_894	CpG_1595,CpG_1596,CpG_1597,CpG_1598,CpG_1599,CpG_1625,CpG_1626,CpG_1627,CpG_1628,CpG_1629,CpG_1630,CpG_1631,CpG_1632,CpG_1633,CpG_1634,CpG_890,CpG_891,CpG_892,CpG_893,CpG_894	Bin1	Apoe,Bin1,Lsr
GO Cellular Component	GO:0044449	contractile fiber part	45	9.794420e-2	1.000000e+0	1.000000e+0	2.000985e+0	2.498769e+0	5	29	2.857143e-2	1.724138e-1	2	6	208	CpG_207,CpG_890,CpG_891,CpG_892,CpG_894	CpG_203,CpG_204,CpG_205,CpG_206,CpG_207,CpG_208,CpG_209,CpG_210,CpG_211,CpG_293,CpG_294,CpG_295,CpG_767,CpG_768,CpG_769,CpG_770,CpG_771,CpG_890,CpG_891,CpG_892,CpG_893,CpG_894,CpG_895,CpG_896,CpG_902,CpG_903,CpG_904,CpG_905,CpG_906	Arf1,Bin1	Arf1,Bin1,Kcne1,Kcnn2,Lman1,Tcap
GO Cellular Component	GO:0030017	sarcomere	45	9.794420e-2	1.000000e+0	1.000000e+0	2.000985e+0	2.498769e+0	5	29	2.857143e-2	1.724138e-1	2	6	196	CpG_207,CpG_890,CpG_891,CpG_892,CpG_894	CpG_203,CpG_204,CpG_205,CpG_206,CpG_207,CpG_208,CpG_209,CpG_210,CpG_211,CpG_293,CpG_294,CpG_295,CpG_767,CpG_768,CpG_769,CpG_770,CpG_771,CpG_890,CpG_891,CpG_892,CpG_893,CpG_894,CpG_895,CpG_896,CpG_902,CpG_903,CpG_904,CpG_905,CpG_906	Arf1,Bin1	Arf1,Bin1,Kcne1,Kcnn2,Lman1,Tcap
GO Cellular Component	GO:0001650	fibrillar center	45	9.794420e-2	1.000000e+0	1.000000e+0	2.000985e+0	2.498769e+0	5	29	2.857143e-2	1.724138e-1	1	3	124	CpG_101,CpG_102,CpG_103,CpG_105,CpG_106	CpG_100,CpG_101,CpG_102,CpG_103,CpG_104,CpG_105,CpG_106,CpG_107,CpG_874,CpG_875,CpG_92,CpG_93,CpG_94,CpG_95,CpG_96,CpG_97,CpG_972,CpG_973,CpG_974,CpG_975,CpG_976,CpG_977,CpG_978,CpG_979,CpG_98,CpG_980,CpG_981,CpG_982,CpG_99	Nfic	Dclre1a,Ddx11,Nfic
GO Cellular Component	GO:0005770	late endosome	45	9.794420e-2	1.000000e+0	1.000000e+0	2.000985e+0	2.498769e+0	5	29	2.857143e-2	1.724138e-1	4	5	214	CpG_1693,CpG_184,CpG_207,CpG_949,CpG_953	CpG_1688,CpG_1689,CpG_1690,CpG_1691,CpG_1692,CpG_1693,CpG_184,CpG_185,CpG_186,CpG_187,CpG_188,CpG_189,CpG_203,CpG_204,CpG_205,CpG_206,CpG_207,CpG_208,CpG_209,CpG_210,CpG_211,CpG_293,CpG_294,CpG_295,CpG_949,CpG_950,CpG_951,CpG_952,CpG_953	Arf1,Irgm1,Uvrag,Vps37c	Arf1,Irgm1,Stard3,Uvrag,Vps37c
GO Cellular Component	GO:0001669	acrosomal vesicle	49	1.002489e-1	1.000000e+0	1.000000e+0	2.210612e+0	1.809453e+0	4	21	2.285714e-2	1.904762e-1	1	4	142	CpG_1640,CpG_1641,CpG_1642,CpG_1644	CpG_1225,CpG_1226,CpG_1227,CpG_1228,CpG_1229,CpG_1640,CpG_1641,CpG_1642,CpG_1643,CpG_1644,CpG_1749,CpG_1750,CpG_1751,CpG_1752,CpG_1753,CpG_1754,CpG_1755,CpG_1756,CpG_1757,CpG_895,CpG_896	Tsks	Atp8b5,Rab3a,Trim36,Tsks
GO Cellular Component	GO:0031902	late endosome membrane	50	1.130712e-1	1.000000e+0	1.000000e+0	2.486939e+0	1.206302e+0	3	14	1.714286e-2	2.142857e-1	2	3	112	CpG_184,CpG_949,CpG_953	CpG_184,CpG_185,CpG_186,CpG_187,CpG_188,CpG_189,CpG_293,CpG_294,CpG_295,CpG_949,CpG_950,CpG_951,CpG_952,CpG_953	Irgm1,Vps37c	Irgm1,Stard3,Vps37c
GO Cellular Component	GO:0015629	actin cytoskeleton	51	1.168925e-1	1.000000e+0	1.000000e+0	1.558977e+0	5.773018e+0	9	67	5.142857e-2	1.343284e-1	4	11	451	CpG_222,CpG_282,CpG_283,CpG_287,CpG_289,CpG_501,CpG_502,CpG_504,CpG_970	CpG_1217,CpG_1218,CpG_1219,CpG_1222,CpG_1223,CpG_1224,CpG_1412,CpG_1413,CpG_1414,CpG_1469,CpG_1470,CpG_218,CpG_219,CpG_220,CpG_221,CpG_222,CpG_223,CpG_269,CpG_270,CpG_271,CpG_272,CpG_273,CpG_274,CpG_275,CpG_276,CpG_277,CpG_278,CpG_279,CpG_280,CpG_281,CpG_282,CpG_283,CpG_284,CpG_285,CpG_286,CpG_287,CpG_288,CpG_289,CpG_290,CpG_291,CpG_292,CpG_355,CpG_356,CpG_357,CpG_500,CpG_501,CpG_502,CpG_503,CpG_…	Dapk1,Gas7,Sh3pxd2a,Srcin1	Bin3,Cttnbp2nl,Dapk1,Ddx58,Gas7,Sept9,Sh3bp1,Sh3pxd2a,Srcin1,Stx1a,Yes1
GO Cellular Component	GO:0001891	phagocytic cup	52	1.327950e-1	1.000000e+0	1.000000e+0	2.321143e+0	1.292467e+0	3	15	1.714286e-2	2.000000e-1	2	3	25	CpG_184,CpG_80,CpG_82	CpG_184,CpG_185,CpG_186,CpG_187,CpG_188,CpG_189,CpG_614,CpG_615,CpG_616,CpG_617,CpG_618,CpG_619,CpG_80,CpG_81,CpG_82	Abca7,Irgm1	Abca7,Irgm1,Sh3bp1
GO Cellular Component	GO:0043025	neuronal cell body	53	1.428173e-1	1.000000e+0	1.000000e+0	1.492163e+0	6.031512e+0	9	70	5.142857e-2	1.285714e-1	7	14	443	CpG_262,CpG_27,CpG_40,CpG_41,CpG_42,CpG_640,CpG_766,CpG_84,CpG_970	CpG_1335,CpG_1336,CpG_1337,CpG_1338,CpG_1339,CpG_1340,CpG_1645,CpG_1646,CpG_1647,CpG_1648,CpG_1649,CpG_1650,CpG_1651,CpG_1652,CpG_1653,CpG_1654,CpG_1655,CpG_1656,CpG_1657,CpG_1658,CpG_1694,CpG_1695,CpG_1696,CpG_1697,CpG_1698,CpG_1699,CpG_262,CpG_263,CpG_264,CpG_265,CpG_266,CpG_267,CpG_268,CpG_27,CpG_28,CpG_29,CpG_30,CpG_35,CpG_36,CpG_37,CpG_38,CpG_39,CpG_40,CpG_41,CpG_42,CpG_488,CpG_489,CpG_529,C…	Atxn10,Efna2,Neurl1a,Ptprn,Sod1,Tbx21,Tgfb2	Atxn10,Brinp2,Btd,Camk2n1,Efna2,Gabra5,Kcnn2,Neurl1a,Nrsn1,Numa1,Ptprn,Sod1,Tbx21,Tgfb2
GO Cellular Component	GO:0005773	vacuole	54	1.458867e-1	1.000000e+0	1.000000e+0	1.371584e+0	9.478090e+0	13	110	7.428571e-2	1.181818e-1	8	19	581	CpG_1480,CpG_1693,CpG_184,CpG_262,CpG_358,CpG_501,CpG_502,CpG_504,CpG_766,CpG_983,CpG_985,CpG_986,CpG_987	CpG_1163,CpG_1164,CpG_1165,CpG_1166,CpG_1167,CpG_1168,CpG_1169,CpG_1170,CpG_1171,CpG_1172,CpG_1173,CpG_1174,CpG_1239,CpG_1240,CpG_1241,CpG_1242,CpG_1243,CpG_1324,CpG_1325,CpG_1326,CpG_1327,CpG_1328,CpG_1329,CpG_1330,CpG_1331,CpG_1332,CpG_1333,CpG_1334,CpG_1401,CpG_1402,CpG_1403,CpG_1404,CpG_1405,CpG_1406,CpG_1453,CpG_1454,CpG_1455,CpG_1479,CpG_1480,CpG_1481,CpG_1518,CpG_1519,CpG_1520,CpG_1521,CpG…	BC051665,Engase,Irgm1,Osbpl7,Pip4k2a,Pon2,Sod1,Uvrag	BC051665,Borcs8,Ece1,Engase,Eva1a,Irgm1,Kif2a,Lrba,Nr4a3,Osbpl7,Pip4k2a,Pon2,Scarb1,Slc35f6,Smpd1,Sod1,Stard3,Tbc1d5,Uvrag
GO Cellular Component	GO:1905368	peptidase complex	55	1.465242e-1	1.000000e+0	1.000000e+0	2.901429e+0	6.893156e-1	2	8	1.142857e-2	2.500000e-1	2	2	95	CpG_1660,CpG_27	CpG_1659,CpG_1660,CpG_1661,CpG_1662,CpG_27,CpG_28,CpG_29,CpG_30	Dnajb2,Ube3a	Dnajb2,Ube3a
GO Cellular Component	GO:1905369	endopeptidase complex	55	1.465242e-1	1.000000e+0	1.000000e+0	2.901429e+0	6.893156e-1	2	8	1.142857e-2	2.500000e-1	2	2	72	CpG_1660,CpG_27	CpG_1659,CpG_1660,CpG_1661,CpG_1662,CpG_27,CpG_28,CpG_29,CpG_30	Dnajb2,Ube3a	Dnajb2,Ube3a
GO Cellular Component	GO:0000502	proteasome complex	55	1.465242e-1	1.000000e+0	1.000000e+0	2.901429e+0	6.893156e-1	2	8	1.142857e-2	2.500000e-1	2	2	71	CpG_1660,CpG_27	CpG_1659,CpG_1660,CpG_1661,CpG_1662,CpG_27,CpG_28,CpG_29,CpG_30	Dnajb2,Ube3a	Dnajb2,Ube3a
GO Cellular Component	GO:0097440	apical dendrite	58	1.649434e-1	1.000000e+0	1.000000e+0	5.802857e+0	1.723289e-1	1	2	5.714286e-3	5.000000e-1	1	1	12	CpG_970	CpG_970,CpG_971	Neurl1a	Neurl1a
GO Cellular Component	GO:0098798	mitochondrial protein complex	58	1.649434e-1	1.000000e+0	1.000000e+0	5.802857e+0	1.723289e-1	1	2	5.714286e-3	5.000000e-1	1	1	150	CpG_1322	CpG_1322,CpG_1323	Atpif1	Atpif1
GO Cellular Component	GO:0045259	proton-transporting ATP synthase complex	58	1.649434e-1	1.000000e+0	1.000000e+0	5.802857e+0	1.723289e-1	1	2	5.714286e-3	5.000000e-1	1	1	24	CpG_1322	CpG_1322,CpG_1323	Atpif1	Atpif1
GO Cellular Component	GO:0098800	inner mitochondrial membrane protein complex	58	1.649434e-1	1.000000e+0	1.000000e+0	5.802857e+0	1.723289e-1	1	2	5.714286e-3	5.000000e-1	1	1	127	CpG_1322	CpG_1322,CpG_1323	Atpif1	Atpif1
GO Cellular Component	GO:0002102	podosome	58	1.649434e-1	1.000000e+0	1.000000e+0	5.802857e+0	1.723289e-1	1	2	5.714286e-3	5.000000e-1	1	1	31	CpG_970	CpG_970,CpG_971	Sh3pxd2a	Sh3pxd2a
GO Cellular Component	GO:0031594	neuromuscular junction	58	1.649434e-1	1.000000e+0	1.000000e+0	5.802857e+0	1.723289e-1	1	2	5.714286e-3	5.000000e-1	1	1	62	CpG_84	CpG_83,CpG_84	Efna2	Efna2
GO Cellular Component	GO:0005753	mitochondrial proton-transporting ATP synthase complex	58	1.649434e-1	1.000000e+0	1.000000e+0	5.802857e+0	1.723289e-1	1	2	5.714286e-3	5.000000e-1	1	1	23	CpG_1322	CpG_1322,CpG_1323	Atpif1	Atpif1
GO Cellular Component	GO:0016469	proton-transporting two-sector ATPase complex	58	1.649434e-1	1.000000e+0	1.000000e+0	5.802857e+0	1.723289e-1	1	2	5.714286e-3	5.000000e-1	1	1	52	CpG_1322	CpG_1322,CpG_1323	Atpif1	Atpif1
GO Cellular Component	GO:0098862	cluster of actin-based cell projections	66	1.753714e-1	1.000000e+0	1.000000e+0	2.048067e+0	1.464796e+0	3	17	1.714286e-2	1.764706e-1	2	2	168	CpG_766,CpG_932,CpG_938	CpG_763,CpG_764,CpG_765,CpG_766,CpG_928,CpG_929,CpG_930,CpG_931,CpG_932,CpG_933,CpG_934,CpG_935,CpG_936,CpG_937,CpG_938,CpG_939,CpG_940	Slc22a12,Tiam1	Slc22a12,Tiam1
GO Cellular Component	GO:0030139	endocytic vesicle	66	1.753714e-1	1.000000e+0	1.000000e+0	2.048067e+0	1.464796e+0	3	17	1.714286e-2	1.764706e-1	3	4	147	CpG_1693,CpG_184,CpG_566	CpG_1688,CpG_1689,CpG_1690,CpG_1691,CpG_1692,CpG_1693,CpG_184,CpG_185,CpG_186,CpG_187,CpG_188,CpG_189,CpG_564,CpG_565,CpG_566,CpG_856,CpG_857	Irgm1,Scara5,Uvrag	Irgm1,Scara5,Tbc1d5,Uvrag
GO Cellular Component	GO:0044815	DNA packaging complex	68	1.781560e-1	1.000000e+0	1.000000e+0	2.579048e+0	7.754801e-1	2	9	1.142857e-2	2.222222e-1	1	3	126	CpG_21,CpG_22	CpG_1180,CpG_1181,CpG_1182,CpG_1183,CpG_1184,CpG_19,CpG_20,CpG_21,CpG_22	Tnp1	Hist2h2ab,Hist2h2be,Tnp1
GO Cellular Component	GO:0000786	nucleosome	68	1.781560e-1	1.000000e+0	1.000000e+0	2.579048e+0	7.754801e-1	2	9	1.142857e-2	2.222222e-1	1	3	118	CpG_21,CpG_22	CpG_1180,CpG_1181,CpG_1182,CpG_1183,CpG_1184,CpG_19,CpG_20,CpG_21,CpG_22	Tnp1	Hist2h2ab,Hist2h2be,Tnp1
GO Cellular Component	GO:0043204	perikaryon	70	1.979262e-1	1.000000e+0	1.000000e+0	1.934286e+0	1.550960e+0	3	18	1.714286e-2	1.666667e-1	3	4	111	CpG_27,CpG_84,CpG_970	CpG_27,CpG_28,CpG_29,CpG_30,CpG_529,CpG_530,CpG_531,CpG_532,CpG_533,CpG_534,CpG_535,CpG_536,CpG_537,CpG_538,CpG_83,CpG_84,CpG_970,CpG_971	Efna2,Neurl1a,Ptprn	Btd,Efna2,Neurl1a,Ptprn
GO Cellular Component	GO:0005791	rough endoplasmic reticulum	71	2.106970e-1	1.000000e+0	1.000000e+0	2.321143e+0	8.616445e-1	2	10	1.142857e-2	2.000000e-1	1	2	72	CpG_1539,CpG_1540	CpG_1239,CpG_1240,CpG_1241,CpG_1242,CpG_1243,CpG_1539,CpG_1540,CpG_1541,CpG_1542,CpG_1543	Rpn1	Rpn1,Sec61b
GO Cellular Component	GO:0031519	PcG protein complex	72	2.170582e-1	1.000000e+0	1.000000e+0	1.657959e+0	2.412605e+0	4	28	2.285714e-2	1.428571e-1	1	3	46	CpG_282,CpG_283,CpG_287,CpG_289	CpG_280,CpG_281,CpG_282,CpG_283,CpG_284,CpG_285,CpG_286,CpG_287,CpG_288,CpG_289,CpG_290,CpG_291,CpG_292,CpG_363,CpG_364,CpG_365,CpG_366,CpG_367,CpG_368,CpG_369,CpG_370,CpG_371,CpG_372,CpG_373,CpG_374,CpG_375,CpG_376,CpG_377	Epop	Cbx4,Cbx8,Epop
GO Cellular Component	GO:0005768	endosome	73	2.180185e-1	1.000000e+0	1.000000e+0	1.302682e+0	8.444116e+0	11	98	6.285714e-2	1.122449e-1	7	18	740	CpG_1693,CpG_184,CpG_207,CpG_27,CpG_40,CpG_41,CpG_42,CpG_80,CpG_82,CpG_949,CpG_953	CpG_1324,CpG_1325,CpG_1326,CpG_1327,CpG_1328,CpG_1329,CpG_1330,CpG_1331,CpG_1332,CpG_1333,CpG_1334,CpG_1544,CpG_1545,CpG_1546,CpG_1547,CpG_1548,CpG_1688,CpG_1689,CpG_1690,CpG_1691,CpG_1692,CpG_1693,CpG_1700,CpG_1701,CpG_1702,CpG_1703,CpG_1704,CpG_1705,CpG_1749,CpG_1750,CpG_1751,CpG_1752,CpG_1753,CpG_1754,CpG_1755,CpG_1756,CpG_1757,CpG_184,CpG_185,CpG_186,CpG_187,CpG_188,CpG_189,CpG_1962,CpG_1963,…	Abca7,Arf1,Irgm1,Ptprn,Tgfb2,Uvrag,Vps37c	Abca7,Arf1,Clvs2,D130043K22Rik,Ece1,Fgd5,Gga1,Irgm1,Ptprn,Rab3a,Rftn1,Scamp2,Smpd1,Stard3,Tbc1d5,Tgfb2,Uvrag,Vps37c
GO Cellular Component	GO:0005730	nucleolus	74	2.191397e-1	1.000000e+0	1.000000e+0	1.214551e+0	1.482029e+1	18	172	1.028571e-1	1.046512e-1	5	21	914	CpG_101,CpG_102,CpG_103,CpG_105,CpG_106,CpG_1531,CpG_1815,CpG_1816,CpG_1818,CpG_1820,CpG_1822,CpG_1824,CpG_1826,CpG_1828,CpG_1927,CpG_257,CpG_258,CpG_259	CpG_100,CpG_101,CpG_102,CpG_103,CpG_104,CpG_105,CpG_106,CpG_107,CpG_1079,CpG_1080,CpG_1081,CpG_1082,CpG_1522,CpG_1523,CpG_1524,CpG_1525,CpG_1526,CpG_1527,CpG_1528,CpG_1529,CpG_1530,CpG_1531,CpG_1532,CpG_1549,CpG_1550,CpG_1551,CpG_1552,CpG_1553,CpG_1605,CpG_1606,CpG_1607,CpG_1608,CpG_1609,CpG_1610,CpG_1611,CpG_1612,CpG_1613,CpG_1614,CpG_1615,CpG_1616,CpG_165,CpG_166,CpG_167,CpG_1670,CpG_1671,CpG_1…	Bcas3,Emx1,Nfic,Nol3,Spc24	Bcas3,Btd,Chd2,Dclre1a,Ddx11,Dis3,Emx1,Hand1,Ipmk,Kif2a,Nfic,Nol3,Npm1,Parn,Rps14,Spc24,Taf1b,Tsen2,Vrk1,Xrn2,Zfp146
GO Cellular Component	GO:0030425	dendrite	75	2.332128e-1	1.000000e+0	1.000000e+0	1.266078e+0	9.478090e+0	12	110	6.857143e-2	1.090909e-1	6	16	492	CpG_1640,CpG_1641,CpG_1642,CpG_1644,CpG_222,CpG_282,CpG_283,CpG_287,CpG_289,CpG_640,CpG_766,CpG_970	CpG_1056,CpG_1057,CpG_1058,CpG_1335,CpG_1336,CpG_1337,CpG_1338,CpG_1339,CpG_1340,CpG_1518,CpG_1519,CpG_1520,CpG_1521,CpG_1640,CpG_1641,CpG_1642,CpG_1643,CpG_1644,CpG_1645,CpG_1646,CpG_1647,CpG_1648,CpG_1649,CpG_1650,CpG_1651,CpG_1652,CpG_1653,CpG_1654,CpG_1655,CpG_1656,CpG_1657,CpG_1658,CpG_1694,CpG_1695,CpG_1696,CpG_1697,CpG_1698,CpG_1699,CpG_1941,CpG_1942,CpG_1943,CpG_1944,CpG_1945,CpG_1946,CpG…	Atxn10,Cpt1c,Neurl1a,Rcvrn,Sod1,Srcin1	Atxn10,Bdnf,Brinp2,Cadm1,Camk2n1,Cpt1c,Gabra5,Grik1,Kcnn2,Neurl1a,Numa1,Prr7,Rcvrn,Sod1,Srcin1,Tacr1
GO Cellular Component	GO:0071953	elastic fiber	76	2.369665e-1	1.000000e+0	1.000000e+0	3.868571e+0	2.584934e-1	1	3	5.714286e-3	3.333333e-1	1	1	4	CpG_640	CpG_640,CpG_641,CpG_642	Fbln1	Fbln1
GO Cellular Component	GO:0005577	fibrinogen complex	76	2.369665e-1	1.000000e+0	1.000000e+0	3.868571e+0	2.584934e-1	1	3	5.714286e-3	3.333333e-1	1	1	7	CpG_640	CpG_640,CpG_641,CpG_642	Fbln1	Fbln1
GO Cellular Component	GO:0043292	contractile fiber	78	2.415604e-1	1.000000e+0	1.000000e+0	1.487912e+0	3.360414e+0	5	39	2.857143e-2	1.282051e-1	2	7	228	CpG_207,CpG_890,CpG_891,CpG_892,CpG_894	CpG_1185,CpG_1186,CpG_1187,CpG_1188,CpG_1189,CpG_1190,CpG_1191,CpG_1192,CpG_1193,CpG_1194,CpG_203,CpG_204,CpG_205,CpG_206,CpG_207,CpG_208,CpG_209,CpG_210,CpG_211,CpG_293,CpG_294,CpG_295,CpG_767,CpG_768,CpG_769,CpG_770,CpG_771,CpG_890,CpG_891,CpG_892,CpG_893,CpG_894,CpG_895,CpG_896,CpG_902,CpG_903,CpG_904,CpG_905,CpG_906	Arf1,Bin1	Arf1,Bin1,Kcne1,Kcnn2,Lman1,Pde4dip,Tcap
GO Cellular Component	GO:0030016	myofibril	78	2.415604e-1	1.000000e+0	1.000000e+0	1.487912e+0	3.360414e+0	5	39	2.857143e-2	1.282051e-1	2	7	219	CpG_207,CpG_890,CpG_891,CpG_892,CpG_894	CpG_1185,CpG_1186,CpG_1187,CpG_1188,CpG_1189,CpG_1190,CpG_1191,CpG_1192,CpG_1193,CpG_1194,CpG_203,CpG_204,CpG_205,CpG_206,CpG_207,CpG_208,CpG_209,CpG_210,CpG_211,CpG_293,CpG_294,CpG_295,CpG_767,CpG_768,CpG_769,CpG_770,CpG_771,CpG_890,CpG_891,CpG_892,CpG_893,CpG_894,CpG_895,CpG_896,CpG_902,CpG_903,CpG_904,CpG_905,CpG_906	Arf1,Bin1	Arf1,Bin1,Kcne1,Kcnn2,Lman1,Pde4dip,Tcap
GO Cellular Component	GO:0099572	postsynaptic specialization	80	2.426682e-1	1.000000e+0	1.000000e+0	1.421108e+0	4.222058e+0	6	49	3.428571e-2	1.224490e-1	3	7	220	CpG_207,CpG_282,CpG_283,CpG_287,CpG_289,CpG_970	CpG_1056,CpG_1057,CpG_1058,CpG_1335,CpG_1336,CpG_1337,CpG_1338,CpG_1339,CpG_1340,CpG_1469,CpG_1470,CpG_203,CpG_204,CpG_205,CpG_206,CpG_207,CpG_208,CpG_209,CpG_210,CpG_211,CpG_269,CpG_270,CpG_271,CpG_272,CpG_273,CpG_274,CpG_275,CpG_276,CpG_277,CpG_278,CpG_279,CpG_280,CpG_281,CpG_282,CpG_283,CpG_284,CpG_285,CpG_286,CpG_287,CpG_288,CpG_289,CpG_290,CpG_291,CpG_292,CpG_760,CpG_761,CpG_762,CpG_970,CpG_…	Arf1,Neurl1a,Srcin1	Arf1,Camk2n1,Grik1,Lin7c,Neurl1a,Srcin1,Stx1a
GO Cellular Component	GO:0098984	neuron to neuron synapse	80	2.426682e-1	1.000000e+0	1.000000e+0	1.421108e+0	4.222058e+0	6	49	3.428571e-2	1.224490e-1	3	7	223	CpG_207,CpG_282,CpG_283,CpG_287,CpG_289,CpG_970	CpG_1056,CpG_1057,CpG_1058,CpG_1335,CpG_1336,CpG_1337,CpG_1338,CpG_1339,CpG_1340,CpG_1469,CpG_1470,CpG_203,CpG_204,CpG_205,CpG_206,CpG_207,CpG_208,CpG_209,CpG_210,CpG_211,CpG_269,CpG_270,CpG_271,CpG_272,CpG_273,CpG_274,CpG_275,CpG_276,CpG_277,CpG_278,CpG_279,CpG_280,CpG_281,CpG_282,CpG_283,CpG_284,CpG_285,CpG_286,CpG_287,CpG_288,CpG_289,CpG_290,CpG_291,CpG_292,CpG_760,CpG_761,CpG_762,CpG_970,CpG_…	Arf1,Neurl1a,Srcin1	Arf1,Camk2n1,Grik1,Lin7c,Neurl1a,Srcin1,Stx1a
GO Cellular Component	GO:0014069	postsynaptic density	80	2.426682e-1	1.000000e+0	1.000000e+0	1.421108e+0	4.222058e+0	6	49	3.428571e-2	1.224490e-1	3	7	218	CpG_207,CpG_282,CpG_283,CpG_287,CpG_289,CpG_970	CpG_1056,CpG_1057,CpG_1058,CpG_1335,CpG_1336,CpG_1337,CpG_1338,CpG_1339,CpG_1340,CpG_1469,CpG_1470,CpG_203,CpG_204,CpG_205,CpG_206,CpG_207,CpG_208,CpG_209,CpG_210,CpG_211,CpG_269,CpG_270,CpG_271,CpG_272,CpG_273,CpG_274,CpG_275,CpG_276,CpG_277,CpG_278,CpG_279,CpG_280,CpG_281,CpG_282,CpG_283,CpG_284,CpG_285,CpG_286,CpG_287,CpG_288,CpG_289,CpG_290,CpG_291,CpG_292,CpG_760,CpG_761,CpG_762,CpG_970,CpG_…	Arf1,Neurl1a,Srcin1	Arf1,Camk2n1,Grik1,Lin7c,Neurl1a,Srcin1,Stx1a
GO Cellular Component	GO:0032279	asymmetric synapse	80	2.426682e-1	1.000000e+0	1.000000e+0	1.421108e+0	4.222058e+0	6	49	3.428571e-2	1.224490e-1	3	7	221	CpG_207,CpG_282,CpG_283,CpG_287,CpG_289,CpG_970	CpG_1056,CpG_1057,CpG_1058,CpG_1335,CpG_1336,CpG_1337,CpG_1338,CpG_1339,CpG_1340,CpG_1469,CpG_1470,CpG_203,CpG_204,CpG_205,CpG_206,CpG_207,CpG_208,CpG_209,CpG_210,CpG_211,CpG_269,CpG_270,CpG_271,CpG_272,CpG_273,CpG_274,CpG_275,CpG_276,CpG_277,CpG_278,CpG_279,CpG_280,CpG_281,CpG_282,CpG_283,CpG_284,CpG_285,CpG_286,CpG_287,CpG_288,CpG_289,CpG_290,CpG_291,CpG_292,CpG_760,CpG_761,CpG_762,CpG_970,CpG_…	Arf1,Neurl1a,Srcin1	Arf1,Camk2n1,Grik1,Lin7c,Neurl1a,Srcin1,Stx1a
GO Cellular Component	GO:0042470	melanosome	84	2.437586e-1	1.000000e+0	1.000000e+0	2.110130e+0	9.478090e-1	2	11	1.142857e-2	1.818182e-1	1	2	106	CpG_1539,CpG_1540	CpG_1539,CpG_1540,CpG_1541,CpG_1542,CpG_1543,CpG_212,CpG_213,CpG_214,CpG_215,CpG_216,CpG_217	Rpn1	Rpn1,Trpv2
GO Cellular Component	GO:0030666	endocytic vesicle membrane	84	2.437586e-1	1.000000e+0	1.000000e+0	2.110130e+0	9.478090e-1	2	11	1.142857e-2	1.818182e-1	2	3	62	CpG_184,CpG_566	CpG_184,CpG_185,CpG_186,CpG_187,CpG_188,CpG_189,CpG_564,CpG_565,CpG_566,CpG_856,CpG_857	Irgm1,Scara5	Irgm1,Scara5,Tbc1d5
GO Cellular Component	GO:0000775	chromosome, centromeric region	84	2.437586e-1	1.000000e+0	1.000000e+0	2.110130e+0	9.478090e-1	2	11	1.142857e-2	1.818182e-1	2	2	191	CpG_1693,CpG_1927	CpG_1688,CpG_1689,CpG_1690,CpG_1691,CpG_1692,CpG_1693,CpG_1925,CpG_1926,CpG_1927,CpG_1928,CpG_1929	Spc24,Uvrag	Spc24,Uvrag
GO Cellular Component	GO:0000118	histone deacetylase complex	84	2.437586e-1	1.000000e+0	1.000000e+0	2.110130e+0	9.478090e-1	2	11	1.142857e-2	1.818182e-1	1	2	59	CpG_907,CpG_914	CpG_1453,CpG_1454,CpG_1455,CpG_907,CpG_908,CpG_909,CpG_910,CpG_911,CpG_912,CpG_913,CpG_914	Mbd2	Mbd2,Ncor2
GO Cellular Component	GO:0044297	cell body	88	2.472558e-1	1.000000e+0	1.000000e+0	1.305643e+0	6.893156e+0	9	80	5.142857e-2	1.125000e-1	7	16	516	CpG_262,CpG_27,CpG_40,CpG_41,CpG_42,CpG_640,CpG_766,CpG_84,CpG_970	CpG_1335,CpG_1336,CpG_1337,CpG_1338,CpG_1339,CpG_1340,CpG_1518,CpG_1519,CpG_1520,CpG_1521,CpG_1645,CpG_1646,CpG_1647,CpG_1648,CpG_1649,CpG_1650,CpG_1651,CpG_1652,CpG_1653,CpG_1654,CpG_1655,CpG_1656,CpG_1657,CpG_1658,CpG_1694,CpG_1695,CpG_1696,CpG_1697,CpG_1698,CpG_1699,CpG_212,CpG_213,CpG_214,CpG_215,CpG_216,CpG_217,CpG_262,CpG_263,CpG_264,CpG_265,CpG_266,CpG_267,CpG_268,CpG_27,CpG_28,CpG_29,CpG_…	Atxn10,Efna2,Neurl1a,Ptprn,Sod1,Tbx21,Tgfb2	Atxn10,Brinp2,Btd,Camk2n1,Efna2,Gabra5,Kcnn2,Neurl1a,Nrsn1,Numa1,Ptprn,Sod1,Tacr1,Tbx21,Tgfb2,Trpv2
GO Cellular Component	GO:0031966	mitochondrial membrane	89	2.514289e-1	1.000000e+0	1.000000e+0	1.326367e+0	6.031512e+0	8	70	4.571429e-2	1.142857e-1	4	11	608	CpG_1014,CpG_1023,CpG_1322,CpG_1433,CpG_1640,CpG_1641,CpG_1642,CpG_1644	CpG_1014,CpG_1015,CpG_1016,CpG_1017,CpG_1018,CpG_1019,CpG_1020,CpG_1021,CpG_1022,CpG_1023,CpG_1322,CpG_1323,CpG_1412,CpG_1413,CpG_1414,CpG_1431,CpG_1432,CpG_1433,CpG_1434,CpG_1435,CpG_1436,CpG_1437,CpG_1438,CpG_1439,CpG_1640,CpG_1641,CpG_1642,CpG_1643,CpG_1644,CpG_1735,CpG_1736,CpG_1737,CpG_240,CpG_241,CpG_242,CpG_243,CpG_244,CpG_245,CpG_246,CpG_247,CpG_248,CpG_249,CpG_250,CpG_251,CpG_252,CpG_494…	Atpif1,Cpt1c,Cstad,Sirt4	Atpif1,Bik,Cisd1,Cpt1c,Cstad,Mcur1,Mtch1,Pisd,Rhot1,Sirt4,Vdac3
GO Cellular Component	GO:0045335	phagocytic vesicle	90	2.770117e-1	1.000000e+0	1.000000e+0	1.934286e+0	1.033973e+0	2	12	1.142857e-2	1.666667e-1	2	2	74	CpG_1693,CpG_184	CpG_1688,CpG_1689,CpG_1690,CpG_1691,CpG_1692,CpG_1693,CpG_184,CpG_185,CpG_186,CpG_187,CpG_188,CpG_189	Irgm1,Uvrag	Irgm1,Uvrag
GO Cellular Component	GO:0030141	secretory granule	91	2.898257e-1	1.000000e+0	1.000000e+0	1.271859e+0	6.290005e+0	8	73	4.571429e-2	1.095890e-1	5	13	348	CpG_1433,CpG_1640,CpG_1641,CpG_1642,CpG_1644,CpG_235,CpG_27,CpG_766	CpG_1056,CpG_1057,CpG_1058,CpG_1225,CpG_1226,CpG_1227,CpG_1228,CpG_1229,CpG_1324,CpG_1325,CpG_1326,CpG_1327,CpG_1328,CpG_1329,CpG_1330,CpG_1331,CpG_1332,CpG_1333,CpG_1334,CpG_1431,CpG_1432,CpG_1433,CpG_1434,CpG_1435,CpG_1436,CpG_1437,CpG_1438,CpG_1439,CpG_1469,CpG_1470,CpG_1640,CpG_1641,CpG_1642,CpG_1643,CpG_1644,CpG_1700,CpG_1701,CpG_1702,CpG_1703,CpG_1704,CpG_1705,CpG_1749,CpG_1750,CpG_1751,CpG…	Pla2g1b,Ptprn,Rph3al,Sod1,Tsks	Atp8b5,Bdnf,Ece1,Exoc3l,Pla2g1b,Ptprn,Rab3a,Rph3al,Smpd1,Sod1,Stx1a,Trim36,Tsks
GO Cellular Component	GO:0044440	endosomal part	92	2.926892e-1	1.000000e+0	1.000000e+0	1.381633e+0	3.618907e+0	5	42	2.857143e-2	1.190476e-1	3	9	354	CpG_184,CpG_80,CpG_82,CpG_949,CpG_953	CpG_184,CpG_185,CpG_186,CpG_187,CpG_188,CpG_189,CpG_1962,CpG_1963,CpG_1964,CpG_293,CpG_294,CpG_295,CpG_43,CpG_44,CpG_45,CpG_46,CpG_47,CpG_48,CpG_486,CpG_487,CpG_49,CpG_50,CpG_51,CpG_52,CpG_53,CpG_54,CpG_614,CpG_615,CpG_616,CpG_617,CpG_618,CpG_619,CpG_80,CpG_81,CpG_82,CpG_856,CpG_857,CpG_949,CpG_950,CpG_951,CpG_952,CpG_953	Abca7,Irgm1,Vps37c	Abca7,Clvs2,D130043K22Rik,Gga1,Irgm1,Scamp2,Stard3,Tbc1d5,Vps37c
GO Cellular Component	GO:0010008	endosome membrane	92	2.926892e-1	1.000000e+0	1.000000e+0	1.381633e+0	3.618907e+0	5	42	2.857143e-2	1.190476e-1	3	9	336	CpG_184,CpG_80,CpG_82,CpG_949,CpG_953	CpG_184,CpG_185,CpG_186,CpG_187,CpG_188,CpG_189,CpG_1962,CpG_1963,CpG_1964,CpG_293,CpG_294,CpG_295,CpG_43,CpG_44,CpG_45,CpG_46,CpG_47,CpG_48,CpG_486,CpG_487,CpG_49,CpG_50,CpG_51,CpG_52,CpG_53,CpG_54,CpG_614,CpG_615,CpG_616,CpG_617,CpG_618,CpG_619,CpG_80,CpG_81,CpG_82,CpG_856,CpG_857,CpG_949,CpG_950,CpG_951,CpG_952,CpG_953	Abca7,Irgm1,Vps37c	Abca7,Clvs2,D130043K22Rik,Gga1,Irgm1,Scamp2,Stard3,Tbc1d5,Vps37c
GO Cellular Component	GO:0044304	main axon	94	2.953162e-1	1.000000e+0	1.000000e+0	1.450714e+0	2.757262e+0	4	32	2.285714e-2	1.250000e-1	1	3	67	CpG_890,CpG_891,CpG_892,CpG_894	CpG_1941,CpG_1942,CpG_1943,CpG_1944,CpG_1945,CpG_1946,CpG_1947,CpG_1948,CpG_1949,CpG_1950,CpG_1951,CpG_1952,CpG_1953,CpG_1954,CpG_1955,CpG_1956,CpG_1957,CpG_1958,CpG_1959,CpG_1960,CpG_1961,CpG_754,CpG_755,CpG_756,CpG_757,CpG_758,CpG_759,CpG_890,CpG_891,CpG_892,CpG_893,CpG_894	Bin1	Bin1,Cadm1,Robo1
GO Cellular Component	GO:0044291	cell-cell contact zone	95	3.028101e-1	1.000000e+0	1.000000e+0	2.901429e+0	3.446578e-1	1	4	5.714286e-3	2.500000e-1	1	1	69	CpG_766	CpG_763,CpG_764,CpG_765,CpG_766	Tiam1	Tiam1
GO Cellular Component	GO:0044309	neuron spine	95	3.028101e-1	1.000000e+0	1.000000e+0	2.901429e+0	3.446578e-1	1	4	5.714286e-3	2.500000e-1	1	2	126	CpG_970	CpG_895,CpG_896,CpG_970,CpG_971	Neurl1a	Kcnn2,Neurl1a
GO Cellular Component	GO:0060091	kinocilium	95	3.028101e-1	1.000000e+0	1.000000e+0	2.901429e+0	3.446578e-1	1	4	5.714286e-3	2.500000e-1	1	1	12	CpG_766	CpG_763,CpG_764,CpG_765,CpG_766	Tiam1	Tiam1
GO Cellular Component	GO:1990391	DNA repair complex	95	3.028101e-1	1.000000e+0	1.000000e+0	2.901429e+0	3.446578e-1	1	4	5.714286e-3	2.500000e-1	1	1	38	CpG_476	CpG_475,CpG_476,CpG_477,CpG_478	Rcor1	Rcor1
GO Cellular Component	GO:0043197	dendritic spine	95	3.028101e-1	1.000000e+0	1.000000e+0	2.901429e+0	3.446578e-1	1	4	5.714286e-3	2.500000e-1	1	2	123	CpG_970	CpG_895,CpG_896,CpG_970,CpG_971	Neurl1a	Kcnn2,Neurl1a
GO Cellular Component	GO:0005905	clathrin-coated pit	95	3.028101e-1	1.000000e+0	1.000000e+0	2.901429e+0	3.446578e-1	1	4	5.714286e-3	2.500000e-1	1	2	64	CpG_260	CpG_260,CpG_261,CpG_856,CpG_857	Epn3	Epn3,Tbc1d5
GO Cellular Component	GO:0032839	dendrite cytoplasm	95	3.028101e-1	1.000000e+0	1.000000e+0	2.901429e+0	3.446578e-1	1	4	5.714286e-3	2.500000e-1	1	1	22	CpG_766	CpG_763,CpG_764,CpG_765,CpG_766	Sod1	Sod1
GO Cellular Component	GO:0031045	dense core granule	95	3.028101e-1	1.000000e+0	1.000000e+0	2.901429e+0	3.446578e-1	1	4	5.714286e-3	2.500000e-1	1	1	16	CpG_766	CpG_763,CpG_764,CpG_765,CpG_766	Sod1	Sod1
GO Cellular Component	GO:0032421	stereocilium bundle	95	3.028101e-1	1.000000e+0	1.000000e+0	2.901429e+0	3.446578e-1	1	4	5.714286e-3	2.500000e-1	1	1	60	CpG_766	CpG_763,CpG_764,CpG_765,CpG_766	Tiam1	Tiam1
GO Cellular Component	GO:0005740	mitochondrial envelope	104	3.073700e-1	1.000000e+0	1.000000e+0	1.228840e+0	7.323978e+0	9	85	5.142857e-2	1.058824e-1	5	14	654	CpG_1014,CpG_1023,CpG_1322,CpG_1433,CpG_1640,CpG_1641,CpG_1642,CpG_1644,CpG_766	CpG_1014,CpG_1015,CpG_1016,CpG_1017,CpG_1018,CpG_1019,CpG_1020,CpG_1021,CpG_1022,CpG_1023,CpG_1221,CpG_1322,CpG_1323,CpG_1412,CpG_1413,CpG_1414,CpG_1431,CpG_1432,CpG_1433,CpG_1434,CpG_1435,CpG_1436,CpG_1437,CpG_1438,CpG_1439,CpG_1640,CpG_1641,CpG_1642,CpG_1643,CpG_1644,CpG_1735,CpG_1736,CpG_1737,CpG_1915,CpG_1916,CpG_1917,CpG_1918,CpG_1919,CpG_1920,CpG_1921,CpG_1922,CpG_1923,CpG_1924,CpG_240,CpG_…	Atpif1,Cpt1c,Cstad,Sirt4,Sod1	Atpif1,Bik,Chchd7,Cisd1,Coa6,Cpt1c,Cstad,Mcur1,Mtch1,Pisd,Rhot1,Sirt4,Sod1,Vdac3
GO Cellular Component	GO:0031526	brush border membrane	105	3.101795e-1	1.000000e+0	1.000000e+0	1.785495e+0	1.120138e+0	2	13	1.142857e-2	1.538462e-1	1	1	50	CpG_932,CpG_938	CpG_928,CpG_929,CpG_930,CpG_931,CpG_932,CpG_933,CpG_934,CpG_935,CpG_936,CpG_937,CpG_938,CpG_939,CpG_940	Slc22a12	Slc22a12
GO Cellular Component	GO:0043073	germ cell nucleus	105	3.101795e-1	1.000000e+0	1.000000e+0	1.785495e+0	1.120138e+0	2	13	1.142857e-2	1.538462e-1	1	2	28	CpG_21,CpG_22	CpG_1244,CpG_1245,CpG_1246,CpG_1247,CpG_1248,CpG_1249,CpG_1250,CpG_1251,CpG_1252,CpG_19,CpG_20,CpG_21,CpG_22	Tnp1	Actl7a,Tnp1
GO Cellular Component	GO:0005903	brush border	105	3.101795e-1	1.000000e+0	1.000000e+0	1.785495e+0	1.120138e+0	2	13	1.142857e-2	1.538462e-1	1	1	115	CpG_932,CpG_938	CpG_928,CpG_929,CpG_930,CpG_931,CpG_932,CpG_933,CpG_934,CpG_935,CpG_936,CpG_937,CpG_938,CpG_939,CpG_940	Slc22a12	Slc22a12
GO Cellular Component	GO:0001673	male germ cell nucleus	105	3.101795e-1	1.000000e+0	1.000000e+0	1.785495e+0	1.120138e+0	2	13	1.142857e-2	1.538462e-1	1	2	21	CpG_21,CpG_22	CpG_1244,CpG_1245,CpG_1246,CpG_1247,CpG_1248,CpG_1249,CpG_1250,CpG_1251,CpG_1252,CpG_19,CpG_20,CpG_21,CpG_22	Tnp1	Actl7a,Tnp1
GO Cellular Component	GO:0097223	sperm part	109	3.154996e-1	1.000000e+0	1.000000e+0	1.406753e+0	2.843427e+0	4	33	2.285714e-2	1.212121e-1	1	6	228	CpG_1640,CpG_1641,CpG_1642,CpG_1644	CpG_1225,CpG_1226,CpG_1227,CpG_1228,CpG_1229,CpG_1518,CpG_1519,CpG_1520,CpG_1521,CpG_1640,CpG_1641,CpG_1642,CpG_1643,CpG_1644,CpG_1749,CpG_1750,CpG_1751,CpG_1752,CpG_1753,CpG_1754,CpG_1755,CpG_1756,CpG_1757,CpG_512,CpG_513,CpG_514,CpG_515,CpG_516,CpG_517,CpG_518,CpG_519,CpG_895,CpG_896	Tsks	Atp8b5,Kif2a,Rab3a,Tacr1,Trim36,Tsks
GO Cellular Component	GO:0098796	membrane protein complex	110	3.352554e-1	1.000000e+0	1.000000e+0	1.266078e+0	4.739045e+0	6	55	3.428571e-2	1.090909e-1	5	12	657	CpG_1322,CpG_207,CpG_235,CpG_927,CpG_949,CpG_953	CpG_1056,CpG_1057,CpG_1058,CpG_1239,CpG_1240,CpG_1241,CpG_1242,CpG_1243,CpG_1322,CpG_1323,CpG_1469,CpG_1470,CpG_1735,CpG_1736,CpG_1737,CpG_203,CpG_204,CpG_205,CpG_206,CpG_207,CpG_208,CpG_209,CpG_210,CpG_211,CpG_234,CpG_235,CpG_236,CpG_237,CpG_238,CpG_239,CpG_345,CpG_346,CpG_347,CpG_348,CpG_349,CpG_350,CpG_351,CpG_614,CpG_615,CpG_616,CpG_617,CpG_618,CpG_619,CpG_856,CpG_857,CpG_923,CpG_924,CpG_925,…	Atpif1,Doc2b,Scyl1,Vps37c,Wnt3a	Atpif1,Doc2b,Gga1,Itgb4,Lin7c,Scyl1,Sec61b,Stx1a,Tbc1d5,Vdac3,Vps37c,Wnt3a
GO Cellular Component	GO:0043235	receptor complex	111	3.358013e-1	1.000000e+0	1.000000e+0	1.365378e+0	2.929591e+0	4	34	2.285714e-2	1.176471e-1	1	5	317	CpG_1640,CpG_1641,CpG_1642,CpG_1644	CpG_1640,CpG_1641,CpG_1642,CpG_1643,CpG_1644,CpG_1645,CpG_1646,CpG_1647,CpG_1648,CpG_1649,CpG_1650,CpG_1651,CpG_1652,CpG_1653,CpG_1654,CpG_1655,CpG_1656,CpG_1657,CpG_1658,CpG_345,CpG_346,CpG_347,CpG_348,CpG_349,CpG_350,CpG_351,CpG_760,CpG_761,CpG_762,CpG_818,CpG_819,CpG_820,CpG_821,CpG_822	Cpt1c	Cpt1c,Ddr1,Gabra5,Grik1,Itgb4
GO Cellular Component	GO:0030137	COPI-coated vesicle	112	3.430309e-1	1.000000e+0	1.000000e+0	1.657959e+0	1.206302e+0	2	14	1.142857e-2	1.428571e-1	2	2	21	CpG_207,CpG_927	CpG_203,CpG_204,CpG_205,CpG_206,CpG_207,CpG_208,CpG_209,CpG_210,CpG_211,CpG_923,CpG_924,CpG_925,CpG_926,CpG_927	Arf1,Scyl1	Arf1,Scyl1
GO Cellular Component	GO:0005798	Golgi-associated vesicle	112	3.430309e-1	1.000000e+0	1.000000e+0	1.657959e+0	1.206302e+0	2	14	1.142857e-2	1.428571e-1	2	2	64	CpG_207,CpG_927	CpG_203,CpG_204,CpG_205,CpG_206,CpG_207,CpG_208,CpG_209,CpG_210,CpG_211,CpG_923,CpG_924,CpG_925,CpG_926,CpG_927	Arf1,Scyl1	Arf1,Scyl1
GO Cellular Component	GO:0016607	nuclear speck	114	3.430667e-1	1.000000e+0	1.000000e+0	1.205788e+0	6.634663e+0	8	77	4.571429e-2	1.038961e-1	1	9	368	CpG_1815,CpG_1816,CpG_1818,CpG_1820,CpG_1822,CpG_1824,CpG_1826,CpG_1828	CpG_1056,CpG_1057,CpG_1058,CpG_1221,CpG_1446,CpG_1447,CpG_1448,CpG_1449,CpG_1450,CpG_1451,CpG_1452,CpG_165,CpG_166,CpG_167,CpG_168,CpG_169,CpG_170,CpG_171,CpG_1815,CpG_1816,CpG_1817,CpG_1818,CpG_1819,CpG_1820,CpG_1821,CpG_1822,CpG_1823,CpG_1824,CpG_1825,CpG_1826,CpG_1827,CpG_1828,CpG_1829,CpG_1830,CpG_1831,CpG_1979,CpG_1980,CpG_1981,CpG_1982,CpG_1983,CpG_1984,CpG_1985,CpG_1986,CpG_1987,CpG_1988,C…	Hsf4	Bdnf,Cbx4,Hsf4,Npm1,Plag1,Prpf4b,Setd1b,Tcf12,Zmiz1
GO Cellular Component	GO:0016324	apical plasma membrane	115	3.561610e-1	1.000000e+0	1.000000e+0	1.326367e+0	3.015756e+0	4	35	2.285714e-2	1.142857e-1	2	6	300	CpG_80,CpG_82,CpG_932,CpG_938	CpG_1220,CpG_1458,CpG_1459,CpG_1460,CpG_1461,CpG_1462,CpG_1463,CpG_1464,CpG_1465,CpG_1466,CpG_1467,CpG_1468,CpG_767,CpG_768,CpG_769,CpG_770,CpG_771,CpG_80,CpG_81,CpG_82,CpG_874,CpG_875,CpG_928,CpG_929,CpG_930,CpG_931,CpG_932,CpG_933,CpG_934,CpG_935,CpG_936,CpG_937,CpG_938,CpG_939,CpG_940	Abca7,Slc22a12	Abca7,Ahcyl1,Cldn4,Kcne1,Mtcl1,Slc22a12
GO Cellular Component	GO:0005635	nuclear envelope	115	3.561610e-1	1.000000e+0	1.000000e+0	1.326367e+0	3.015756e+0	4	35	2.285714e-2	1.142857e-1	1	6	433	CpG_890,CpG_891,CpG_892,CpG_894	CpG_1384,CpG_1385,CpG_1386,CpG_1469,CpG_1470,CpG_1726,CpG_1727,CpG_1728,CpG_1729,CpG_505,CpG_506,CpG_507,CpG_508,CpG_509,CpG_510,CpG_511,CpG_876,CpG_877,CpG_878,CpG_879,CpG_880,CpG_881,CpG_882,CpG_883,CpG_884,CpG_885,CpG_886,CpG_887,CpG_888,CpG_889,CpG_890,CpG_891,CpG_892,CpG_893,CpG_894	Bin1	Bin1,Disp3,Fam169a,Gata6,Nlrp6,Stx1a
GO Cellular Component	GO:0016604	nuclear body	117	3.570485e-1	1.000000e+0	1.000000e+0	1.134393e+0	1.145987e+1	13	133	7.428571e-2	9.774436e-2	3	17	713	CpG_161,CpG_162,CpG_164,CpG_1815,CpG_1816,CpG_1818,CpG_1820,CpG_1822,CpG_1824,CpG_1826,CpG_1828,CpG_1846,CpG_1848	CpG_1056,CpG_1057,CpG_1058,CpG_1083,CpG_1084,CpG_1085,CpG_1086,CpG_1087,CpG_1088,CpG_1089,CpG_1090,CpG_1091,CpG_1092,CpG_1093,CpG_1094,CpG_1095,CpG_1096,CpG_1097,CpG_1098,CpG_1221,CpG_1446,CpG_1447,CpG_1448,CpG_1449,CpG_1450,CpG_1451,CpG_1452,CpG_1453,CpG_1454,CpG_1455,CpG_161,CpG_162,CpG_163,CpG_164,CpG_165,CpG_166,CpG_167,CpG_168,CpG_169,CpG_170,CpG_171,CpG_1815,CpG_1816,CpG_1817,CpG_1818,CpG_1…	Bcl11a,Hsf4,Zfhx3	Bcl11a,Bdnf,Cbx4,Ciita,Hsf4,Kif2a,Ncor2,Npm1,Plag1,Prpf4b,Satb1,Setd1b,Stk4,Tcf12,Yars2,Zfhx3,Zmiz1
GO Cellular Component	GO:0030660	Golgi-associated vesicle membrane	118	3.630016e-1	1.000000e+0	1.000000e+0	2.321143e+0	4.308223e-1	1	5	5.714286e-3	2.000000e-1	1	1	35	CpG_927	CpG_923,CpG_924,CpG_925,CpG_926,CpG_927	Scyl1	Scyl1
GO Cellular Component	GO:0030663	COPI-coated vesicle membrane	118	3.630016e-1	1.000000e+0	1.000000e+0	2.321143e+0	4.308223e-1	1	5	5.714286e-3	2.000000e-1	1	1	15	CpG_927	CpG_923,CpG_924,CpG_925,CpG_926,CpG_927	Scyl1	Scyl1
GO Cellular Component	GO:0030126	COPI vesicle coat	118	3.630016e-1	1.000000e+0	1.000000e+0	2.321143e+0	4.308223e-1	1	5	5.714286e-3	2.000000e-1	1	1	12	CpG_927	CpG_923,CpG_924,CpG_925,CpG_926,CpG_927	Scyl1	Scyl1
GO Cellular Component	GO:0031262	Ndc80 complex	118	3.630016e-1	1.000000e+0	1.000000e+0	2.321143e+0	4.308223e-1	1	5	5.714286e-3	2.000000e-1	1	1	4	CpG_1927	CpG_1925,CpG_1926,CpG_1927,CpG_1928,CpG_1929	Spc24	Spc24
GO Cellular Component	GO:0000777	condensed chromosome kinetochore	118	3.630016e-1	1.000000e+0	1.000000e+0	2.321143e+0	4.308223e-1	1	5	5.714286e-3	2.000000e-1	1	1	104	CpG_1927	CpG_1925,CpG_1926,CpG_1927,CpG_1928,CpG_1929	Spc24	Spc24
GO Cellular Component	GO:0000776	kinetochore	118	3.630016e-1	1.000000e+0	1.000000e+0	2.321143e+0	4.308223e-1	1	5	5.714286e-3	2.000000e-1	1	1	133	CpG_1927	CpG_1925,CpG_1926,CpG_1927,CpG_1928,CpG_1929	Spc24	Spc24
GO Cellular Component	GO:0000779	condensed chromosome, centromeric region	118	3.630016e-1	1.000000e+0	1.000000e+0	2.321143e+0	4.308223e-1	1	5	5.714286e-3	2.000000e-1	1	1	117	CpG_1927	CpG_1925,CpG_1926,CpG_1927,CpG_1928,CpG_1929	Spc24	Spc24
GO Cellular Component	GO:0005801	cis-Golgi network	118	3.630016e-1	1.000000e+0	1.000000e+0	2.321143e+0	4.308223e-1	1	5	5.714286e-3	2.000000e-1	1	1	42	CpG_927	CpG_923,CpG_924,CpG_925,CpG_926,CpG_927	Scyl1	Scyl1
GO Cellular Component	GO:0000139	Golgi membrane	126	3.686650e-1	1.000000e+0	1.000000e+0	1.132265e+0	1.059823e+1	12	123	6.857143e-2	9.756098e-2	5	17	543	CpG_1307,CpG_1308,CpG_1309,CpG_184,CpG_207,CpG_80,CpG_82,CpG_838,CpG_840,CpG_842,CpG_845,CpG_847	CpG_1195,CpG_1196,CpG_1197,CpG_1198,CpG_1199,CpG_1200,CpG_1201,CpG_1202,CpG_1203,CpG_1204,CpG_1205,CpG_1206,CpG_1207,CpG_1208,CpG_1209,CpG_1210,CpG_1211,CpG_1212,CpG_1213,CpG_1214,CpG_1215,CpG_1216,CpG_1307,CpG_1308,CpG_1309,CpG_1384,CpG_1385,CpG_1386,CpG_1694,CpG_1695,CpG_1696,CpG_1697,CpG_1698,CpG_1699,CpG_184,CpG_185,CpG_186,CpG_187,CpG_188,CpG_189,CpG_1962,CpG_1963,CpG_1964,CpG_203,CpG_204,Cp…	Abca7,Arf1,Faah,Irgm1,Mymx	Abca7,Arf1,Asap2,Faah,Il17rd,Irgm1,Lman1,Man1a,Man1a2,Mgat2,Mgat5b,Mymx,Ndst1,Numa1,Scamp2,Sec16b,Ubiad1
GO Cellular Component	GO:0031012	extracellular matrix	127	3.810911e-1	1.000000e+0	1.000000e+0	1.129760e+0	9.736583e+0	11	113	6.285714e-2	9.734513e-2	7	18	534	CpG_1539,CpG_1540,CpG_1693,CpG_207,CpG_40,CpG_41,CpG_42,CpG_640,CpG_643,CpG_662,CpG_766	CpG_1217,CpG_1218,CpG_1272,CpG_1273,CpG_1274,CpG_1275,CpG_1276,CpG_1277,CpG_1278,CpG_1279,CpG_1280,CpG_1281,CpG_1282,CpG_1283,CpG_1387,CpG_1388,CpG_1389,CpG_1390,CpG_1391,CpG_1539,CpG_1540,CpG_1541,CpG_1542,CpG_1543,CpG_1595,CpG_1596,CpG_1597,CpG_1598,CpG_1599,CpG_1688,CpG_1689,CpG_1690,CpG_1691,CpG_1692,CpG_1693,CpG_1869,CpG_1870,CpG_1871,CpG_203,CpG_204,CpG_205,CpG_206,CpG_207,CpG_208,CpG_209,C…	Fbln1,Rpn1,Sod1,Tgfb2,Wnt11,Wnt3a,Wnt7b	Adamts18,Adamtsl5,Apoe,Ccbe1,Fbln1,Frem1,Gp5,Itgb4,Mmp23,Rpn1,Rps14,Sod1,Tgfb2,Wnt10b,Wnt11,Wnt2b,Wnt3a,Wnt7b
GO Cellular Component	GO:0044433	cytoplasmic vesicle part	128	3.961523e-1	1.000000e+0	1.000000e+0	1.135342e+0	7.927129e+0	9	92	5.142857e-2	9.782609e-2	7	18	738	CpG_184,CpG_235,CpG_27,CpG_566,CpG_80,CpG_82,CpG_927,CpG_949,CpG_953	CpG_1225,CpG_1226,CpG_1227,CpG_1228,CpG_1229,CpG_1384,CpG_1385,CpG_1386,CpG_1469,CpG_1470,CpG_1749,CpG_1750,CpG_1751,CpG_1752,CpG_1753,CpG_1754,CpG_1755,CpG_1756,CpG_1757,CpG_184,CpG_185,CpG_186,CpG_187,CpG_188,CpG_189,CpG_1962,CpG_1963,CpG_1964,CpG_234,CpG_235,CpG_236,CpG_237,CpG_238,CpG_239,CpG_27,CpG_28,CpG_29,CpG_293,CpG_294,CpG_295,CpG_30,CpG_43,CpG_44,CpG_45,CpG_46,CpG_47,CpG_48,CpG_486,CpG…	Abca7,Irgm1,Ptprn,Rph3al,Scara5,Scyl1,Vps37c	Abca7,Atp8b5,Clvs2,D130043K22Rik,Disp3,Gga1,Irgm1,March11,Ptprn,Rab3a,Rph3al,Scamp2,Scara5,Scyl1,Stard3,Stx1a,Tbc1d5,Vps37c
GO Cellular Component	GO:0032993	protein-DNA complex	129	4.070554e-1	1.000000e+0	1.000000e+0	1.450714e+0	1.378631e+0	2	16	1.142857e-2	1.250000e-1	1	4	211	CpG_21,CpG_22	CpG_1180,CpG_1181,CpG_1182,CpG_1183,CpG_1184,CpG_165,CpG_166,CpG_167,CpG_168,CpG_169,CpG_170,CpG_171,CpG_19,CpG_20,CpG_21,CpG_22	Tnp1	Hist2h2ab,Hist2h2be,Npm1,Tnp1
GO Cellular Component	GO:0070418	DNA-dependent protein kinase complex	130	4.180237e-1	1.000000e+0	1.000000e+0	1.934286e+0	5.169867e-1	1	6	5.714286e-3	1.666667e-1	1	1	1	CpG_1693	CpG_1688,CpG_1689,CpG_1690,CpG_1691,CpG_1692,CpG_1693	Uvrag	Uvrag
GO Cellular Component	GO:0032838	cell projection cytoplasm	130	4.180237e-1	1.000000e+0	1.000000e+0	1.934286e+0	5.169867e-1	1	6	5.714286e-3	1.666667e-1	1	2	63	CpG_766	CpG_1593,CpG_1594,CpG_763,CpG_764,CpG_765,CpG_766	Sod1	Bloc1s3,Sod1
GO Cellular Component	GO:1904115	axon cytoplasm	130	4.180237e-1	1.000000e+0	1.000000e+0	1.934286e+0	5.169867e-1	1	6	5.714286e-3	1.666667e-1	1	2	39	CpG_766	CpG_1593,CpG_1594,CpG_763,CpG_764,CpG_765,CpG_766	Sod1	Bloc1s3,Sod1
GO Cellular Component	GO:0044754	autolysosome	130	4.180237e-1	1.000000e+0	1.000000e+0	1.934286e+0	5.169867e-1	1	6	5.714286e-3	1.666667e-1	1	1	11	CpG_184	CpG_184,CpG_185,CpG_186,CpG_187,CpG_188,CpG_189	Irgm1	Irgm1
GO Cellular Component	GO:0000421	autophagosome membrane	130	4.180237e-1	1.000000e+0	1.000000e+0	1.934286e+0	5.169867e-1	1	6	5.714286e-3	1.666667e-1	1	1	29	CpG_184	CpG_184,CpG_185,CpG_186,CpG_187,CpG_188,CpG_189	Irgm1	Irgm1
GO Cellular Component	GO:0005767	secondary lysosome	130	4.180237e-1	1.000000e+0	1.000000e+0	1.934286e+0	5.169867e-1	1	6	5.714286e-3	1.666667e-1	1	1	14	CpG_184	CpG_184,CpG_185,CpG_186,CpG_187,CpG_188,CpG_189	Irgm1	Irgm1
GO Cellular Component	GO:0030670	phagocytic vesicle membrane	130	4.180237e-1	1.000000e+0	1.000000e+0	1.934286e+0	5.169867e-1	1	6	5.714286e-3	1.666667e-1	1	1	47	CpG_184	CpG_184,CpG_185,CpG_186,CpG_187,CpG_188,CpG_189	Irgm1	Irgm1
GO Cellular Component	GO:0031253	cell projection membrane	137	4.370881e-1	1.000000e+0	1.000000e+0	1.190330e+0	3.360414e+0	4	39	2.285714e-2	1.025641e-1	3	8	278	CpG_80,CpG_82,CpG_932,CpG_938	CpG_1222,CpG_1223,CpG_1224,CpG_1453,CpG_1454,CpG_1455,CpG_1544,CpG_1545,CpG_1546,CpG_1547,CpG_1548,CpG_614,CpG_615,CpG_616,CpG_617,CpG_618,CpG_619,CpG_754,CpG_755,CpG_756,CpG_757,CpG_758,CpG_759,CpG_80,CpG_81,CpG_82,CpG_928,CpG_929,CpG_930,CpG_931,CpG_932,CpG_933,CpG_934,CpG_935,CpG_936,CpG_937,CpG_938,CpG_939,CpG_940	Abca7,Arhgap45,Slc22a12	Abca7,Arhgap45,Ddx58,Fgd5,Robo1,Scarb1,Sh3bp1,Slc22a12
GO Cellular Component	GO:0032587	ruffle membrane	138	4.379466e-1	1.000000e+0	1.000000e+0	1.365378e+0	1.464796e+0	2	17	1.142857e-2	1.176471e-1	2	5	82	CpG_80,CpG_82	CpG_1222,CpG_1223,CpG_1224,CpG_1544,CpG_1545,CpG_1546,CpG_1547,CpG_1548,CpG_614,CpG_615,CpG_616,CpG_617,CpG_618,CpG_619,CpG_80,CpG_81,CpG_82	Abca7,Arhgap45	Abca7,Arhgap45,Ddx58,Fgd5,Sh3bp1
GO Cellular Component	GO:0031901	early endosome membrane	138	4.379466e-1	1.000000e+0	1.000000e+0	1.365378e+0	1.464796e+0	2	17	1.142857e-2	1.176471e-1	1	3	104	CpG_80,CpG_82	CpG_43,CpG_44,CpG_45,CpG_46,CpG_47,CpG_48,CpG_486,CpG_487,CpG_49,CpG_50,CpG_51,CpG_52,CpG_53,CpG_54,CpG_80,CpG_81,CpG_82	Abca7	Abca7,Clvs2,D130043K22Rik
GO Cellular Component	GO:0044429	mitochondrial part	140	4.604346e-1	1.000000e+0	1.000000e+0	1.076819e+0	8.357952e+0	9	97	5.142857e-2	9.278351e-2	5	16	889	CpG_1014,CpG_1023,CpG_1322,CpG_1433,CpG_1640,CpG_1641,CpG_1642,CpG_1644,CpG_766	CpG_1014,CpG_1015,CpG_1016,CpG_1017,CpG_1018,CpG_1019,CpG_1020,CpG_1021,CpG_1022,CpG_1023,CpG_1221,CpG_1322,CpG_1323,CpG_1412,CpG_1413,CpG_1414,CpG_1431,CpG_1432,CpG_1433,CpG_1434,CpG_1435,CpG_1436,CpG_1437,CpG_1438,CpG_1439,CpG_1640,CpG_1641,CpG_1642,CpG_1643,CpG_1644,CpG_1735,CpG_1736,CpG_1737,CpG_1915,CpG_1916,CpG_1917,CpG_1918,CpG_1919,CpG_1920,CpG_1921,CpG_1922,CpG_1923,CpG_1924,CpG_240,CpG_…	Atpif1,Cpt1c,Cstad,Sirt4,Sod1	Atpif1,Bik,Chchd7,Cisd1,Coa6,Cpt1c,Cstad,Mcur1,Mrps10,Mtch1,Pisd,Rhot1,Sirt4,Sod1,Vdac3,Yars2
GO Cellular Component	GO:0045211	postsynaptic membrane	141	4.630266e-1	1.000000e+0	1.000000e+0	1.105306e+0	5.428360e+0	6	63	3.428571e-2	9.523810e-2	3	8	226	CpG_207,CpG_282,CpG_283,CpG_287,CpG_289,CpG_970	CpG_1056,CpG_1057,CpG_1058,CpG_1335,CpG_1336,CpG_1337,CpG_1338,CpG_1339,CpG_1340,CpG_1645,CpG_1646,CpG_1647,CpG_1648,CpG_1649,CpG_1650,CpG_1651,CpG_1652,CpG_1653,CpG_1654,CpG_1655,CpG_1656,CpG_1657,CpG_1658,CpG_203,CpG_204,CpG_205,CpG_206,CpG_207,CpG_208,CpG_209,CpG_210,CpG_211,CpG_269,CpG_270,CpG_271,CpG_272,CpG_273,CpG_274,CpG_275,CpG_276,CpG_277,CpG_278,CpG_279,CpG_280,CpG_281,CpG_282,CpG_283,…	Arf1,Neurl1a,Srcin1	Arf1,Camk2n1,Gabra5,Grik1,Lin7c,Neurl1a,Prr7,Srcin1
GO Cellular Component	GO:0097038	perinuclear endoplasmic reticulum	142	4.683180e-1	1.000000e+0	1.000000e+0	1.657959e+0	6.031512e-1	1	7	5.714286e-3	1.428571e-1	1	1	13	CpG_262	CpG_262,CpG_263,CpG_264,CpG_265,CpG_266,CpG_267,CpG_268	Osbpl7	Osbpl7
GO Cellular Component	GO:0030662	coated vesicle membrane	142	4.683180e-1	1.000000e+0	1.000000e+0	1.657959e+0	6.031512e-1	1	7	5.714286e-3	1.428571e-1	1	2	77	CpG_927	CpG_856,CpG_857,CpG_923,CpG_924,CpG_925,CpG_926,CpG_927	Scyl1	Scyl1,Tbc1d5
GO Cellular Component	GO:0030120	vesicle coat	142	4.683180e-1	1.000000e+0	1.000000e+0	1.657959e+0	6.031512e-1	1	7	5.714286e-3	1.428571e-1	1	2	45	CpG_927	CpG_856,CpG_857,CpG_923,CpG_924,CpG_925,CpG_926,CpG_927	Scyl1	Scyl1,Tbc1d5
GO Cellular Component	GO:0017053	transcriptional repressor complex	142	4.683180e-1	1.000000e+0	1.000000e+0	1.657959e+0	6.031512e-1	1	7	5.714286e-3	1.428571e-1	1	2	87	CpG_476	CpG_1453,CpG_1454,CpG_1455,CpG_475,CpG_476,CpG_477,CpG_478	Rcor1	Ncor2,Rcor1
GO Cellular Component	GO:0097060	synaptic membrane	146	4.943284e-1	1.000000e+0	1.000000e+0	1.071297e+0	5.600689e+0	6	65	3.428571e-2	9.230769e-2	3	9	295	CpG_207,CpG_282,CpG_283,CpG_287,CpG_289,CpG_970	CpG_1056,CpG_1057,CpG_1058,CpG_1335,CpG_1336,CpG_1337,CpG_1338,CpG_1339,CpG_1340,CpG_1469,CpG_1470,CpG_1645,CpG_1646,CpG_1647,CpG_1648,CpG_1649,CpG_1650,CpG_1651,CpG_1652,CpG_1653,CpG_1654,CpG_1655,CpG_1656,CpG_1657,CpG_1658,CpG_203,CpG_204,CpG_205,CpG_206,CpG_207,CpG_208,CpG_209,CpG_210,CpG_211,CpG_269,CpG_270,CpG_271,CpG_272,CpG_273,CpG_274,CpG_275,CpG_276,CpG_277,CpG_278,CpG_279,CpG_280,CpG_28…	Arf1,Neurl1a,Srcin1	Arf1,Camk2n1,Gabra5,Grik1,Lin7c,Neurl1a,Prr7,Srcin1,Stx1a
GO Cellular Component	GO:0045202	synapse	147	5.036410e-1	1.000000e+0	1.000000e+0	1.024034e+0	1.464796e+1	15	170	8.571429e-2	8.823529e-2	9	22	849	CpG_1511,CpG_1640,CpG_1641,CpG_1642,CpG_1644,CpG_1866,CpG_207,CpG_235,CpG_27,CpG_282,CpG_283,CpG_287,CpG_289,CpG_84,CpG_970	CpG_1056,CpG_1057,CpG_1058,CpG_1335,CpG_1336,CpG_1337,CpG_1338,CpG_1339,CpG_1340,CpG_1469,CpG_1470,CpG_1509,CpG_1510,CpG_1511,CpG_1512,CpG_1513,CpG_1514,CpG_1515,CpG_1640,CpG_1641,CpG_1642,CpG_1643,CpG_1644,CpG_1645,CpG_1646,CpG_1647,CpG_1648,CpG_1649,CpG_1650,CpG_1651,CpG_1652,CpG_1653,CpG_1654,CpG_1655,CpG_1656,CpG_1657,CpG_1658,CpG_1749,CpG_1750,CpG_1751,CpG_1752,CpG_1753,CpG_1754,CpG_1755,CpG…	Arf1,Calb2,Chn2,Cpt1c,Doc2b,Efna2,Neurl1a,Ptprn,Srcin1	Arf1,Bdnf,Cadm1,Calb2,Camk2n1,Cdh8,Chn2,Cpt1c,Doc2b,Efna2,Gabra5,Grik1,Kcnn2,Lin7c,Neurl1a,Prima1,Prr7,Ptprn,Rab3a,Sdk2,Srcin1,Stx1a
GO Cellular Component	GO:0033267	axon part	148	5.097602e-1	1.000000e+0	1.000000e+0	1.055065e+0	5.686854e+0	6	66	3.428571e-2	9.090909e-2	3	8	189	CpG_1866,CpG_766,CpG_890,CpG_891,CpG_892,CpG_894	CpG_1593,CpG_1594,CpG_1749,CpG_1750,CpG_1751,CpG_1752,CpG_1753,CpG_1754,CpG_1755,CpG_1756,CpG_1757,CpG_1856,CpG_1857,CpG_1858,CpG_1859,CpG_1860,CpG_1861,CpG_1862,CpG_1863,CpG_1864,CpG_1865,CpG_1866,CpG_1867,CpG_1868,CpG_1941,CpG_1942,CpG_1943,CpG_1944,CpG_1945,CpG_1946,CpG_1947,CpG_1948,CpG_1949,CpG_1950,CpG_1951,CpG_1952,CpG_1953,CpG_1954,CpG_1955,CpG_1956,CpG_1957,CpG_1958,CpG_1959,CpG_1960,CpG…	Bin1,Calb2,Sod1	Bin1,Bloc1s3,Cadm1,Calb2,Rab3a,Robo1,Sod1,Trpv2
GO Cellular Component	GO:1902554	serine/threonine protein kinase complex	149	5.142885e-1	1.000000e+0	1.000000e+0	1.450714e+0	6.893156e-1	1	8	5.714286e-3	1.250000e-1	1	2	86	CpG_1693	CpG_1688,CpG_1689,CpG_1690,CpG_1691,CpG_1692,CpG_1693,CpG_856,CpG_857	Uvrag	Tbc1d5,Uvrag
GO Cellular Component	GO:0031201	SNARE complex	149	5.142885e-1	1.000000e+0	1.000000e+0	1.450714e+0	6.893156e-1	1	8	5.714286e-3	1.250000e-1	1	2	49	CpG_235	CpG_1469,CpG_1470,CpG_234,CpG_235,CpG_236,CpG_237,CpG_238,CpG_239	Doc2b	Doc2b,Stx1a
GO Cellular Component	GO:0016234	inclusion body	149	5.142885e-1	1.000000e+0	1.000000e+0	1.450714e+0	6.893156e-1	1	8	5.714286e-3	1.250000e-1	1	2	75	CpG_27	CpG_1079,CpG_1080,CpG_1081,CpG_1082,CpG_27,CpG_28,CpG_29,CpG_30	Dnajb2	Dnajb2,Xrn2
GO Cellular Component	GO:0019897	extrinsic component of plasma membrane	152	5.250014e-1	1.000000e+0	1.000000e+0	1.160571e+0	1.723289e+0	2	20	1.142857e-2	1.000000e-1	2	5	165	CpG_260,CpG_766	CpG_1412,CpG_1413,CpG_1414,CpG_1694,CpG_1695,CpG_1696,CpG_1697,CpG_1698,CpG_1699,CpG_1773,CpG_1774,CpG_1775,CpG_1776,CpG_1777,CpG_260,CpG_261,CpG_763,CpG_764,CpG_765,CpG_766	Epn3,Tiam1	Cyld,Epn3,Numa1,Tiam1,Yes1
GO Cellular Component	GO:0098794	postsynapse	153	5.250210e-1	1.000000e+0	1.000000e+0	1.039318e+0	5.773018e+0	6	67	3.428571e-2	8.955224e-2	3	11	432	CpG_207,CpG_282,CpG_283,CpG_287,CpG_289,CpG_970	CpG_1056,CpG_1057,CpG_1058,CpG_1335,CpG_1336,CpG_1337,CpG_1338,CpG_1339,CpG_1340,CpG_1469,CpG_1470,CpG_1645,CpG_1646,CpG_1647,CpG_1648,CpG_1649,CpG_1650,CpG_1651,CpG_1652,CpG_1653,CpG_1654,CpG_1655,CpG_1656,CpG_1657,CpG_1658,CpG_203,CpG_204,CpG_205,CpG_206,CpG_207,CpG_208,CpG_209,CpG_210,CpG_211,CpG_269,CpG_270,CpG_271,CpG_272,CpG_273,CpG_274,CpG_275,CpG_276,CpG_277,CpG_278,CpG_279,CpG_280,CpG_28…	Arf1,Neurl1a,Srcin1	Arf1,Bdnf,Camk2n1,Gabra5,Grik1,Kcnn2,Lin7c,Neurl1a,Prr7,Srcin1,Stx1a
GO Cellular Component	GO:0044452	nucleolar part	154	5.370449e-1	1.000000e+0	1.000000e+0	1.036224e+0	4.825209e+0	5	56	2.857143e-2	8.928571e-2	1	5	171	CpG_101,CpG_102,CpG_103,CpG_105,CpG_106	CpG_100,CpG_101,CpG_102,CpG_103,CpG_104,CpG_105,CpG_106,CpG_107,CpG_165,CpG_166,CpG_167,CpG_168,CpG_169,CpG_170,CpG_171,CpG_421,CpG_422,CpG_423,CpG_424,CpG_425,CpG_426,CpG_427,CpG_428,CpG_429,CpG_430,CpG_431,CpG_432,CpG_433,CpG_434,CpG_435,CpG_436,CpG_437,CpG_438,CpG_439,CpG_440,CpG_874,CpG_875,CpG_92,CpG_93,CpG_94,CpG_95,CpG_96,CpG_97,CpG_972,CpG_973,CpG_974,CpG_975,CpG_976,CpG_977,CpG_978,CpG_9…	Nfic	Dclre1a,Ddx11,Nfic,Npm1,Taf1b
GO Cellular Component	GO:0030658	transport vesicle membrane	155	5.519540e-1	1.000000e+0	1.000000e+0	1.105306e+0	1.809453e+0	2	21	1.142857e-2	9.523810e-2	2	4	144	CpG_235,CpG_27	CpG_1469,CpG_1470,CpG_1749,CpG_1750,CpG_1751,CpG_1752,CpG_1753,CpG_1754,CpG_1755,CpG_1756,CpG_1757,CpG_234,CpG_235,CpG_236,CpG_237,CpG_238,CpG_239,CpG_27,CpG_28,CpG_29,CpG_30	Ptprn,Rph3al	Ptprn,Rab3a,Rph3al,Stx1a
GO Cellular Component	GO:0043209	myelin sheath	155	5.519540e-1	1.000000e+0	1.000000e+0	1.105306e+0	1.809453e+0	2	21	1.142857e-2	9.523810e-2	2	4	206	CpG_1456,CpG_766	CpG_1456,CpG_1457,CpG_450,CpG_451,CpG_452,CpG_453,CpG_454,CpG_455,CpG_456,CpG_763,CpG_764,CpG_765,CpG_766,CpG_941,CpG_942,CpG_943,CpG_944,CpG_945,CpG_946,CpG_947,CpG_948	Sod1,Ubc	Mpp5,Sod1,Stip1,Ubc
GO Cellular Component	GO:1990851	Wnt-Frizzled-LRP5/6 complex	157	5.563051e-1	1.000000e+0	1.000000e+0	1.289524e+0	7.754801e-1	1	9	5.714286e-3	1.111111e-1	1	1	4	CpG_207	CpG_203,CpG_204,CpG_205,CpG_206,CpG_207,CpG_208,CpG_209,CpG_210,CpG_211	Wnt3a	Wnt3a
GO Cellular Component	GO:1990909	Wnt signalosome	157	5.563051e-1	1.000000e+0	1.000000e+0	1.289524e+0	7.754801e-1	1	9	5.714286e-3	1.111111e-1	1	1	9	CpG_207	CpG_203,CpG_204,CpG_205,CpG_206,CpG_207,CpG_208,CpG_209,CpG_210,CpG_211	Wnt3a	Wnt3a
GO Cellular Component	GO:0044439	peroxisomal part	157	5.563051e-1	1.000000e+0	1.000000e+0	1.289524e+0	7.754801e-1	1	9	5.714286e-3	1.111111e-1	1	1	70	CpG_207	CpG_203,CpG_204,CpG_205,CpG_206,CpG_207,CpG_208,CpG_209,CpG_210,CpG_211	Arf1	Arf1
GO Cellular Component	GO:0005778	peroxisomal membrane	157	5.563051e-1	1.000000e+0	1.000000e+0	1.289524e+0	7.754801e-1	1	9	5.714286e-3	1.111111e-1	1	1	59	CpG_207	CpG_203,CpG_204,CpG_205,CpG_206,CpG_207,CpG_208,CpG_209,CpG_210,CpG_211	Arf1	Arf1
GO Cellular Component	GO:0030659	cytoplasmic vesicle membrane	161	5.694301e-1	1.000000e+0	1.000000e+0	1.000493e+0	4.997538e+0	5	58	2.857143e-2	8.620690e-2	5	11	424	CpG_184,CpG_235,CpG_27,CpG_566,CpG_927	CpG_1225,CpG_1226,CpG_1227,CpG_1228,CpG_1229,CpG_1384,CpG_1385,CpG_1386,CpG_1469,CpG_1470,CpG_1749,CpG_1750,CpG_1751,CpG_1752,CpG_1753,CpG_1754,CpG_1755,CpG_1756,CpG_1757,CpG_184,CpG_185,CpG_186,CpG_187,CpG_188,CpG_189,CpG_234,CpG_235,CpG_236,CpG_237,CpG_238,CpG_239,CpG_27,CpG_28,CpG_29,CpG_30,CpG_564,CpG_565,CpG_566,CpG_592,CpG_593,CpG_594,CpG_595,CpG_596,CpG_597,CpG_598,CpG_599,CpG_600,CpG_601,…	Irgm1,Ptprn,Rph3al,Scara5,Scyl1	Atp8b5,Disp3,Irgm1,March11,Ptprn,Rab3a,Rph3al,Scara5,Scyl1,Stx1a,Tbc1d5
GO Cellular Component	GO:0012506	vesicle membrane	161	5.694301e-1	1.000000e+0	1.000000e+0	1.000493e+0	4.997538e+0	5	58	2.857143e-2	8.620690e-2	5	11	442	CpG_184,CpG_235,CpG_27,CpG_566,CpG_927	CpG_1225,CpG_1226,CpG_1227,CpG_1228,CpG_1229,CpG_1384,CpG_1385,CpG_1386,CpG_1469,CpG_1470,CpG_1749,CpG_1750,CpG_1751,CpG_1752,CpG_1753,CpG_1754,CpG_1755,CpG_1756,CpG_1757,CpG_184,CpG_185,CpG_186,CpG_187,CpG_188,CpG_189,CpG_234,CpG_235,CpG_236,CpG_237,CpG_238,CpG_239,CpG_27,CpG_28,CpG_29,CpG_30,CpG_564,CpG_565,CpG_566,CpG_592,CpG_593,CpG_594,CpG_595,CpG_596,CpG_597,CpG_598,CpG_599,CpG_600,CpG_601,…	Irgm1,Ptprn,Rph3al,Scara5,Scyl1	Atp8b5,Disp3,Irgm1,March11,Ptprn,Rab3a,Rph3al,Scara5,Scyl1,Stx1a,Tbc1d5
GO Cellular Component	GO:0005764	lysosome	163	5.711758e-1	1.000000e+0	1.000000e+0	9.877204e-1	8.099458e+0	8	94	4.571429e-2	8.510638e-2	6	16	486	CpG_1480,CpG_1693,CpG_184,CpG_358,CpG_501,CpG_502,CpG_504,CpG_766	CpG_1163,CpG_1164,CpG_1165,CpG_1166,CpG_1167,CpG_1168,CpG_1169,CpG_1170,CpG_1171,CpG_1172,CpG_1173,CpG_1174,CpG_1239,CpG_1240,CpG_1241,CpG_1242,CpG_1243,CpG_1324,CpG_1325,CpG_1326,CpG_1327,CpG_1328,CpG_1329,CpG_1330,CpG_1331,CpG_1332,CpG_1333,CpG_1334,CpG_1401,CpG_1402,CpG_1403,CpG_1404,CpG_1405,CpG_1406,CpG_1453,CpG_1454,CpG_1455,CpG_1479,CpG_1480,CpG_1481,CpG_1518,CpG_1519,CpG_1520,CpG_1521,CpG…	BC051665,Engase,Irgm1,Pon2,Sod1,Uvrag	BC051665,Borcs8,Ece1,Engase,Eva1a,Irgm1,Kif2a,Lrba,Nr4a3,Pon2,Scarb1,Slc35f6,Smpd1,Sod1,Stard3,Uvrag
GO Cellular Component	GO:0099503	secretory vesicle	163	5.711758e-1	1.000000e+0	1.000000e+0	9.877204e-1	8.099458e+0	8	94	4.571429e-2	8.510638e-2	6	15	480	CpG_1433,CpG_1640,CpG_1641,CpG_1642,CpG_1644,CpG_235,CpG_27,CpG_766	CpG_1056,CpG_1057,CpG_1058,CpG_1225,CpG_1226,CpG_1227,CpG_1228,CpG_1229,CpG_1324,CpG_1325,CpG_1326,CpG_1327,CpG_1328,CpG_1329,CpG_1330,CpG_1331,CpG_1332,CpG_1333,CpG_1334,CpG_1431,CpG_1432,CpG_1433,CpG_1434,CpG_1435,CpG_1436,CpG_1437,CpG_1438,CpG_1439,CpG_1469,CpG_1470,CpG_1640,CpG_1641,CpG_1642,CpG_1643,CpG_1644,CpG_1700,CpG_1701,CpG_1702,CpG_1703,CpG_1704,CpG_1705,CpG_1749,CpG_1750,CpG_1751,CpG…	Doc2b,Pla2g1b,Ptprn,Rph3al,Sod1,Tsks	Atp8b5,Bdnf,Cadm1,Doc2b,Ece1,Exoc3l,Pla2g1b,Ptprn,Rab3a,Rph3al,Smpd1,Sod1,Stx1a,Trim36,Tsks
GO Cellular Component	GO:0098687	chromosomal region	165	5.778184e-1	1.000000e+0	1.000000e+0	1.055065e+0	1.895618e+0	2	22	1.142857e-2	9.090909e-2	2	3	349	CpG_1693,CpG_1927	CpG_1688,CpG_1689,CpG_1690,CpG_1691,CpG_1692,CpG_1693,CpG_1925,CpG_1926,CpG_1927,CpG_1928,CpG_1929,CpG_972,CpG_973,CpG_974,CpG_975,CpG_976,CpG_977,CpG_978,CpG_979,CpG_980,CpG_981,CpG_982	Spc24,Uvrag	Dclre1a,Spc24,Uvrag
GO Cellular Component	GO:0019898	extrinsic component of membrane	165	5.778184e-1	1.000000e+0	1.000000e+0	1.055065e+0	1.895618e+0	2	22	1.142857e-2	9.090909e-2	2	6	272	CpG_260,CpG_766	CpG_1077,CpG_1078,CpG_1412,CpG_1413,CpG_1414,CpG_1694,CpG_1695,CpG_1696,CpG_1697,CpG_1698,CpG_1699,CpG_1773,CpG_1774,CpG_1775,CpG_1776,CpG_1777,CpG_260,CpG_261,CpG_763,CpG_764,CpG_765,CpG_766	Epn3,Tiam1	Bcl2l11,Cyld,Epn3,Numa1,Tiam1,Yes1
GO Cellular Component	GO:0005581	collagen trimer	167	5.947060e-1	1.000000e+0	1.000000e+0	1.160571e+0	8.616445e-1	1	10	5.714286e-3	1.000000e-1	1	2	84	CpG_358	CpG_358,CpG_359,CpG_360,CpG_361,CpG_362,CpG_902,CpG_903,CpG_904,CpG_905,CpG_906	C1qtnf1	C1qtnf1,Ccbe1
GO Cellular Component	GO:0031256	leading edge membrane	168	6.025811e-1	1.000000e+0	1.000000e+0	1.009193e+0	1.981782e+0	2	23	1.142857e-2	8.695652e-2	2	6	142	CpG_80,CpG_82	CpG_1222,CpG_1223,CpG_1224,CpG_1544,CpG_1545,CpG_1546,CpG_1547,CpG_1548,CpG_614,CpG_615,CpG_616,CpG_617,CpG_618,CpG_619,CpG_754,CpG_755,CpG_756,CpG_757,CpG_758,CpG_759,CpG_80,CpG_81,CpG_82	Abca7,Arhgap45	Abca7,Arhgap45,Ddx58,Fgd5,Robo1,Sh3bp1
GO Cellular Component	GO:0005777	peroxisome	168	6.025811e-1	1.000000e+0	1.000000e+0	1.009193e+0	1.981782e+0	2	23	1.142857e-2	8.695652e-2	2	3	140	CpG_207,CpG_766	CpG_203,CpG_204,CpG_205,CpG_206,CpG_207,CpG_208,CpG_209,CpG_210,CpG_211,CpG_529,CpG_530,CpG_531,CpG_532,CpG_533,CpG_534,CpG_535,CpG_536,CpG_537,CpG_538,CpG_763,CpG_764,CpG_765,CpG_766	Arf1,Sod1	Arf1,Hacl1,Sod1
GO Cellular Component	GO:0044431	Golgi apparatus part	170	6.168788e-1	1.000000e+0	1.000000e+0	9.549005e-1	1.361398e+1	13	158	7.428571e-2	8.227848e-2	6	21	730	CpG_1307,CpG_1308,CpG_1309,CpG_184,CpG_207,CpG_80,CpG_82,CpG_838,CpG_840,CpG_842,CpG_845,CpG_847,CpG_927	CpG_1163,CpG_1164,CpG_1165,CpG_1166,CpG_1167,CpG_1168,CpG_1169,CpG_1170,CpG_1171,CpG_1172,CpG_1173,CpG_1174,CpG_1195,CpG_1196,CpG_1197,CpG_1198,CpG_1199,CpG_1200,CpG_1201,CpG_1202,CpG_1203,CpG_1204,CpG_1205,CpG_1206,CpG_1207,CpG_1208,CpG_1209,CpG_1210,CpG_1211,CpG_1212,CpG_1213,CpG_1214,CpG_1215,CpG_1216,CpG_1307,CpG_1308,CpG_1309,CpG_1384,CpG_1385,CpG_1386,CpG_1694,CpG_1695,CpG_1696,CpG_1697,CpG…	Abca7,Arf1,Faah,Irgm1,Mymx,Scyl1	Abca7,Arf1,Asap2,Clvs2,Faah,Il17rd,Irgm1,Lman1,Lrba,Man1a,Man1a2,Mgat2,Mgat5b,Mymx,Ndst1,Numa1,Scamp2,Scyl1,Sec16b,Ubiad1,Vrk1
GO Cellular Component	GO:1990351	transporter complex	171	6.215003e-1	1.000000e+0	1.000000e+0	9.474052e-1	4.222058e+0	4	49	2.285714e-2	8.163265e-2	1	7	311	CpG_1640,CpG_1641,CpG_1642,CpG_1644	CpG_1083,CpG_1084,CpG_1085,CpG_1086,CpG_1087,CpG_1088,CpG_1089,CpG_1090,CpG_1091,CpG_1092,CpG_1093,CpG_1094,CpG_1095,CpG_1096,CpG_1097,CpG_1098,CpG_1469,CpG_1470,CpG_1640,CpG_1641,CpG_1642,CpG_1643,CpG_1644,CpG_1645,CpG_1646,CpG_1647,CpG_1648,CpG_1649,CpG_1650,CpG_1651,CpG_1652,CpG_1653,CpG_1654,CpG_1655,CpG_1656,CpG_1657,CpG_1658,CpG_760,CpG_761,CpG_762,CpG_767,CpG_768,CpG_769,CpG_770,CpG_771,Cp…	Cpt1c	Cpt1c,Gabra5,Grik1,Kcne1,Kcnip2,Kcns1,Stx1a
GO Cellular Component	GO:1902495	transmembrane transporter complex	171	6.215003e-1	1.000000e+0	1.000000e+0	9.474052e-1	4.222058e+0	4	49	2.285714e-2	8.163265e-2	1	7	304	CpG_1640,CpG_1641,CpG_1642,CpG_1644	CpG_1083,CpG_1084,CpG_1085,CpG_1086,CpG_1087,CpG_1088,CpG_1089,CpG_1090,CpG_1091,CpG_1092,CpG_1093,CpG_1094,CpG_1095,CpG_1096,CpG_1097,CpG_1098,CpG_1469,CpG_1470,CpG_1640,CpG_1641,CpG_1642,CpG_1643,CpG_1644,CpG_1645,CpG_1646,CpG_1647,CpG_1648,CpG_1649,CpG_1650,CpG_1651,CpG_1652,CpG_1653,CpG_1654,CpG_1655,CpG_1656,CpG_1657,CpG_1658,CpG_760,CpG_761,CpG_762,CpG_767,CpG_768,CpG_769,CpG_770,CpG_771,Cp…	Cpt1c	Cpt1c,Gabra5,Grik1,Kcne1,Kcnip2,Kcns1,Stx1a
GO Cellular Component	GO:0034702	ion channel complex	171	6.215003e-1	1.000000e+0	1.000000e+0	9.474052e-1	4.222058e+0	4	49	2.285714e-2	8.163265e-2	1	7	274	CpG_1640,CpG_1641,CpG_1642,CpG_1644	CpG_1083,CpG_1084,CpG_1085,CpG_1086,CpG_1087,CpG_1088,CpG_1089,CpG_1090,CpG_1091,CpG_1092,CpG_1093,CpG_1094,CpG_1095,CpG_1096,CpG_1097,CpG_1098,CpG_1469,CpG_1470,CpG_1640,CpG_1641,CpG_1642,CpG_1643,CpG_1644,CpG_1645,CpG_1646,CpG_1647,CpG_1648,CpG_1649,CpG_1650,CpG_1651,CpG_1652,CpG_1653,CpG_1654,CpG_1655,CpG_1656,CpG_1657,CpG_1658,CpG_760,CpG_761,CpG_762,CpG_767,CpG_768,CpG_769,CpG_770,CpG_771,Cp…	Cpt1c	Cpt1c,Gabra5,Grik1,Kcne1,Kcnip2,Kcns1,Stx1a
GO Cellular Component	GO:0030667	secretory granule membrane	174	6.298007e-1	1.000000e+0	1.000000e+0	1.055065e+0	9.478090e-1	1	11	5.714286e-3	9.090909e-2	1	2	85	CpG_235	CpG_1225,CpG_1226,CpG_1227,CpG_1228,CpG_1229,CpG_234,CpG_235,CpG_236,CpG_237,CpG_238,CpG_239	Rph3al	Atp8b5,Rph3al
GO Cellular Component	GO:0045177	apical part of cell	175	6.535966e-1	1.000000e+0	1.000000e+0	9.102521e-1	4.394387e+0	4	51	2.285714e-2	7.843137e-2	2	8	376	CpG_80,CpG_82,CpG_932,CpG_938	CpG_1220,CpG_1458,CpG_1459,CpG_1460,CpG_1461,CpG_1462,CpG_1463,CpG_1464,CpG_1465,CpG_1466,CpG_1467,CpG_1468,CpG_1694,CpG_1695,CpG_1696,CpG_1697,CpG_1698,CpG_1699,CpG_529,CpG_530,CpG_531,CpG_532,CpG_533,CpG_534,CpG_535,CpG_536,CpG_537,CpG_538,CpG_767,CpG_768,CpG_769,CpG_770,CpG_771,CpG_80,CpG_81,CpG_82,CpG_874,CpG_875,CpG_928,CpG_929,CpG_930,CpG_931,CpG_932,CpG_933,CpG_934,CpG_935,CpG_936,CpG_937,…	Abca7,Slc22a12	Abca7,Ahcyl1,Btd,Cldn4,Kcne1,Mtcl1,Numa1,Slc22a12
GO Cellular Component	GO:0005874	microtubule	176	6.551282e-1	1.000000e+0	1.000000e+0	9.192645e-1	8.702610e+0	8	101	4.571429e-2	7.920792e-2	3	14	392	CpG_257,CpG_258,CpG_259,CpG_766,CpG_890,CpG_891,CpG_892,CpG_894	CpG_1077,CpG_1078,CpG_115,CpG_116,CpG_117,CpG_118,CpG_119,CpG_1694,CpG_1695,CpG_1696,CpG_1697,CpG_1698,CpG_1699,CpG_1773,CpG_1774,CpG_1775,CpG_1776,CpG_1777,CpG_1872,CpG_1873,CpG_1874,CpG_1881,CpG_1882,CpG_1883,CpG_1884,CpG_1885,CpG_1886,CpG_1887,CpG_1888,CpG_1889,CpG_1890,CpG_1891,CpG_1892,CpG_1893,CpG_1894,CpG_1895,CpG_1896,CpG_1897,CpG_1898,CpG_1899,CpG_1900,CpG_1901,CpG_1902,CpG_1903,CpG_1904…	Bcas3,Bin1,Tiam1	Bcas3,Bcl2l11,Bin1,Clmp,Cyld,Dynlrb2,Kif2a,Map10,Mdm1,Numa1,Reep3,Sept9,Tiam1,Tubg2
GO Cellular Component	GO:0098562	cytoplasmic side of membrane	177	6.618724e-1	1.000000e+0	1.000000e+0	9.671429e-1	1.033973e+0	1	12	5.714286e-3	8.333333e-2	1	3	188	CpG_766	CpG_1412,CpG_1413,CpG_1414,CpG_1773,CpG_1774,CpG_1775,CpG_1776,CpG_1777,CpG_763,CpG_764,CpG_765,CpG_766	Tiam1	Cyld,Tiam1,Yes1
GO Cellular Component	GO:0097730	non-motile cilium	177	6.618724e-1	1.000000e+0	1.000000e+0	9.671429e-1	1.033973e+0	1	12	5.714286e-3	8.333333e-2	1	3	134	CpG_766	CpG_115,CpG_116,CpG_117,CpG_118,CpG_119,CpG_355,CpG_356,CpG_357,CpG_763,CpG_764,CpG_765,CpG_766	Tiam1	Mdm1,Sept9,Tiam1
GO Cellular Component	GO:0009898	cytoplasmic side of plasma membrane	177	6.618724e-1	1.000000e+0	1.000000e+0	9.671429e-1	1.033973e+0	1	12	5.714286e-3	8.333333e-2	1	3	172	CpG_766	CpG_1412,CpG_1413,CpG_1414,CpG_1773,CpG_1774,CpG_1775,CpG_1776,CpG_1777,CpG_763,CpG_764,CpG_765,CpG_766	Tiam1	Cyld,Tiam1,Yes1
GO Cellular Component	GO:0002177	manchette	177	6.618724e-1	1.000000e+0	1.000000e+0	9.671429e-1	1.033973e+0	1	12	5.714286e-3	8.333333e-2	1	1	10	CpG_716	CpG_710,CpG_711,CpG_712,CpG_713,CpG_714,CpG_715,CpG_716,CpG_717,CpG_718,CpG_719,CpG_720,CpG_721	Rimbp3	Rimbp3
GO Cellular Component	GO:0031234	extrinsic component of cytoplasmic side of plasma membrane	177	6.618724e-1	1.000000e+0	1.000000e+0	9.671429e-1	1.033973e+0	1	12	5.714286e-3	8.333333e-2	1	3	109	CpG_766	CpG_1412,CpG_1413,CpG_1414,CpG_1773,CpG_1774,CpG_1775,CpG_1776,CpG_1777,CpG_763,CpG_764,CpG_765,CpG_766	Tiam1	Cyld,Tiam1,Yes1
GO Cellular Component	GO:0005769	early endosome	182	6.670983e-1	1.000000e+0	1.000000e+0	8.927473e-1	3.360414e+0	3	39	1.714286e-2	7.692308e-2	2	6	301	CpG_1693,CpG_80,CpG_82	CpG_1324,CpG_1325,CpG_1326,CpG_1327,CpG_1328,CpG_1329,CpG_1330,CpG_1331,CpG_1332,CpG_1333,CpG_1334,CpG_1544,CpG_1545,CpG_1546,CpG_1547,CpG_1548,CpG_1688,CpG_1689,CpG_1690,CpG_1691,CpG_1692,CpG_1693,CpG_43,CpG_44,CpG_45,CpG_46,CpG_47,CpG_48,CpG_486,CpG_487,CpG_49,CpG_50,CpG_51,CpG_52,CpG_53,CpG_54,CpG_80,CpG_81,CpG_82	Abca7,Uvrag	Abca7,Clvs2,D130043K22Rik,Ece1,Fgd5,Uvrag
GO Cellular Component	GO:0035770	ribonucleoprotein granule	183	6.906737e-1	1.000000e+0	1.000000e+0	8.596825e-1	2.326440e+0	2	27	1.142857e-2	7.407407e-2	1	2	193	CpG_1636,CpG_1637	CpG_1029,CpG_1030,CpG_1031,CpG_1032,CpG_1033,CpG_1034,CpG_1035,CpG_1036,CpG_1037,CpG_1038,CpG_1039,CpG_1040,CpG_1041,CpG_1042,CpG_1043,CpG_1044,CpG_1045,CpG_1046,CpG_1047,CpG_1048,CpG_1049,CpG_1050,CpG_1051,CpG_1052,CpG_1635,CpG_1636,CpG_1637	Lsm14a	Hoxd10,Lsm14a
GO Cellular Component	GO:0036464	cytoplasmic ribonucleoprotein granule	183	6.906737e-1	1.000000e+0	1.000000e+0	8.596825e-1	2.326440e+0	2	27	1.142857e-2	7.407407e-2	1	2	182	CpG_1636,CpG_1637	CpG_1029,CpG_1030,CpG_1031,CpG_1032,CpG_1033,CpG_1034,CpG_1035,CpG_1036,CpG_1037,CpG_1038,CpG_1039,CpG_1040,CpG_1041,CpG_1042,CpG_1043,CpG_1044,CpG_1045,CpG_1046,CpG_1047,CpG_1048,CpG_1049,CpG_1050,CpG_1051,CpG_1052,CpG_1635,CpG_1636,CpG_1637	Lsm14a	Hoxd10,Lsm14a
GO Cellular Component	GO:0030117	membrane coat	185	6.911802e-1	1.000000e+0	1.000000e+0	8.927473e-1	1.120138e+0	1	13	5.714286e-3	7.692308e-2	1	3	93	CpG_927	CpG_614,CpG_615,CpG_616,CpG_617,CpG_618,CpG_619,CpG_856,CpG_857,CpG_923,CpG_924,CpG_925,CpG_926,CpG_927	Scyl1	Gga1,Scyl1,Tbc1d5
GO Cellular Component	GO:0022625	cytosolic large ribosomal subunit	185	6.911802e-1	1.000000e+0	1.000000e+0	8.927473e-1	1.120138e+0	1	13	5.714286e-3	7.692308e-2	1	2	78	CpG_1969	CpG_1965,CpG_1966,CpG_1967,CpG_1968,CpG_1969,CpG_1970,CpG_338,CpG_339,CpG_340,CpG_341,CpG_342,CpG_343,CpG_344	Rplp1	Rpl38,Rplp1
GO Cellular Component	GO:0000793	condensed chromosome	185	6.911802e-1	1.000000e+0	1.000000e+0	8.927473e-1	1.120138e+0	1	13	5.714286e-3	7.692308e-2	1	3	307	CpG_1927	CpG_1869,CpG_1870,CpG_1871,CpG_1925,CpG_1926,CpG_1927,CpG_1928,CpG_1929,CpG_459,CpG_460,CpG_461,CpG_462,CpG_463	Spc24	Esrrb,Spc24,Syce1l
GO Cellular Component	GO:0005921	gap junction	185	6.911802e-1	1.000000e+0	1.000000e+0	8.927473e-1	1.120138e+0	1	13	5.714286e-3	7.692308e-2	1	1	32	CpG_1866	CpG_1856,CpG_1857,CpG_1858,CpG_1859,CpG_1860,CpG_1861,CpG_1862,CpG_1863,CpG_1864,CpG_1865,CpG_1866,CpG_1867,CpG_1868	Calb2	Calb2
GO Cellular Component	GO:1990234	transferase complex	189	7.157912e-1	1.000000e+0	1.000000e+0	8.642553e-1	8.099458e+0	7	94	4.000000e-2	7.446809e-2	3	15	772	CpG_1539,CpG_1540,CpG_1693,CpG_282,CpG_283,CpG_287,CpG_289	CpG_1185,CpG_1186,CpG_1187,CpG_1188,CpG_1189,CpG_1190,CpG_1191,CpG_1192,CpG_1193,CpG_1194,CpG_1348,CpG_1349,CpG_1350,CpG_1351,CpG_1352,CpG_1353,CpG_1398,CpG_1399,CpG_1400,CpG_1446,CpG_1447,CpG_1448,CpG_1449,CpG_1450,CpG_1451,CpG_1452,CpG_1539,CpG_1540,CpG_1541,CpG_1542,CpG_1543,CpG_1688,CpG_1689,CpG_1690,CpG_1691,CpG_1692,CpG_1693,CpG_1710,CpG_1711,CpG_1712,CpG_1713,CpG_1714,CpG_1715,CpG_1716,CpG…	Epop,Rpn1,Uvrag	Asb10,Bach1,Cbx4,Cbx8,Epop,Esrrb,Fbxw4,Klhdc7a,Med6,Prkab2,Rpn1,Setd1b,Tbc1d5,Uvrag,Zfp768
GO Cellular Component	GO:0005743	mitochondrial inner membrane	190	7.283760e-1	1.000000e+0	1.000000e+0	8.003941e-1	2.498769e+0	2	29	1.142857e-2	6.896552e-2	2	6	414	CpG_1322,CpG_1433	CpG_1322,CpG_1323,CpG_1412,CpG_1413,CpG_1414,CpG_1431,CpG_1432,CpG_1433,CpG_1434,CpG_1435,CpG_1436,CpG_1437,CpG_1438,CpG_1439,CpG_1735,CpG_1736,CpG_1737,CpG_494,CpG_495,CpG_496,CpG_497,CpG_810,CpG_811,CpG_812,CpG_813,CpG_814,CpG_815,CpG_816,CpG_817	Atpif1,Sirt4	Atpif1,Mcur1,Mtch1,Pisd,Sirt4,Vdac3
GO Cellular Component	GO:0005788	endoplasmic reticulum lumen	191	7.313577e-1	1.000000e+0	1.000000e+0	8.097010e-1	3.705071e+0	3	43	1.714286e-2	6.976744e-2	2	5	108	CpG_207,CpG_643,CpG_662	CpG_1006,CpG_1007,CpG_1008,CpG_1009,CpG_1010,CpG_1011,CpG_1012,CpG_1013,CpG_1056,CpG_1057,CpG_1058,CpG_1516,CpG_1517,CpG_203,CpG_204,CpG_205,CpG_206,CpG_207,CpG_208,CpG_209,CpG_210,CpG_211,CpG_643,CpG_644,CpG_645,CpG_646,CpG_647,CpG_648,CpG_649,CpG_650,CpG_651,CpG_652,CpG_653,CpG_654,CpG_655,CpG_656,CpG_657,CpG_658,CpG_659,CpG_660,CpG_661,CpG_662,CpG_663	Wnt3a,Wnt7b	Bdnf,Cercam,Fkbp9,Wnt3a,Wnt7b
GO Cellular Component	GO:0031970	organelle envelope lumen	192	7.424313e-1	1.000000e+0	1.000000e+0	7.737143e-1	1.292467e+0	1	15	5.714286e-3	6.666667e-2	1	3	94	CpG_766	CpG_1221,CpG_1915,CpG_1916,CpG_1917,CpG_1918,CpG_1919,CpG_1920,CpG_1921,CpG_1922,CpG_1923,CpG_1924,CpG_763,CpG_764,CpG_765,CpG_766	Sod1	Chchd7,Coa6,Sod1
GO Cellular Component	GO:0005758	mitochondrial intermembrane space	192	7.424313e-1	1.000000e+0	1.000000e+0	7.737143e-1	1.292467e+0	1	15	5.714286e-3	6.666667e-2	1	3	81	CpG_766	CpG_1221,CpG_1915,CpG_1916,CpG_1917,CpG_1918,CpG_1919,CpG_1920,CpG_1921,CpG_1922,CpG_1923,CpG_1924,CpG_763,CpG_764,CpG_765,CpG_766	Sod1	Chchd7,Coa6,Sod1
GO Cellular Component	GO:0005793	endoplasmic reticulum-Golgi intermediate compartment	192	7.424313e-1	1.000000e+0	1.000000e+0	7.737143e-1	1.292467e+0	1	15	5.714286e-3	6.666667e-2	1	3	83	CpG_927	CpG_55,CpG_56,CpG_57,CpG_58,CpG_59,CpG_902,CpG_903,CpG_904,CpG_905,CpG_906,CpG_923,CpG_924,CpG_925,CpG_926,CpG_927	Scyl1	Lman1,Man1a,Scyl1
GO Cellular Component	GO:0030135	coated vesicle	195	7.728886e-1	1.000000e+0	1.000000e+0	7.568944e-1	3.963565e+0	3	46	1.714286e-2	6.521739e-2	3	7	159	CpG_207,CpG_260,CpG_927	CpG_1324,CpG_1325,CpG_1326,CpG_1327,CpG_1328,CpG_1329,CpG_1330,CpG_1331,CpG_1332,CpG_1333,CpG_1334,CpG_203,CpG_204,CpG_205,CpG_206,CpG_207,CpG_208,CpG_209,CpG_210,CpG_211,CpG_260,CpG_261,CpG_43,CpG_44,CpG_45,CpG_46,CpG_47,CpG_48,CpG_49,CpG_50,CpG_51,CpG_52,CpG_53,CpG_54,CpG_856,CpG_857,CpG_902,CpG_903,CpG_904,CpG_905,CpG_906,CpG_923,CpG_924,CpG_925,CpG_926,CpG_927	Arf1,Epn3,Scyl1	Arf1,Clvs2,Ece1,Epn3,Lman1,Scyl1,Tbc1d5
GO Cellular Component	GO:0099513	polymeric cytoskeletal fiber	196	7.833244e-1	1.000000e+0	1.000000e+0	8.224522e-1	1.094289e+1	9	127	5.142857e-2	7.086614e-2	4	19	693	CpG_222,CpG_257,CpG_258,CpG_259,CpG_766,CpG_890,CpG_891,CpG_892,CpG_894	CpG_1077,CpG_1078,CpG_115,CpG_116,CpG_117,CpG_118,CpG_119,CpG_1341,CpG_1342,CpG_1343,CpG_1344,CpG_1345,CpG_1346,CpG_1347,CpG_1412,CpG_1413,CpG_1414,CpG_1694,CpG_1695,CpG_1696,CpG_1697,CpG_1698,CpG_1699,CpG_1773,CpG_1774,CpG_1775,CpG_1776,CpG_1777,CpG_1872,CpG_1873,CpG_1874,CpG_1881,CpG_1882,CpG_1883,CpG_1884,CpG_1885,CpG_1886,CpG_1887,CpG_1888,CpG_1889,CpG_1890,CpG_1891,CpG_1892,CpG_1893,CpG_1894…	Bcas3,Bin1,Gas7,Tiam1	Bcas3,Bcl2l11,Bin1,Bin3,Clmp,Cyld,Dynlrb2,Gas7,Gm21969,Iffo2,Kif2a,Map10,Mdm1,Numa1,Reep3,Sept9,Tiam1,Tubg2,Yes1
GO Cellular Component	GO:0005929	cilium	197	7.837599e-1	1.000000e+0	1.000000e+0	8.043564e-1	8.702610e+0	7	101	4.000000e-2	6.930693e-2	2	14	560	CpG_1143,CpG_1144,CpG_1145,CpG_1146,CpG_1147,CpG_1149,CpG_766	CpG_1141,CpG_1142,CpG_1143,CpG_1144,CpG_1145,CpG_1146,CpG_1147,CpG_1148,CpG_1149,CpG_115,CpG_116,CpG_117,CpG_118,CpG_119,CpG_120,CpG_121,CpG_122,CpG_123,CpG_124,CpG_1244,CpG_1245,CpG_1246,CpG_1247,CpG_1248,CpG_1249,CpG_125,CpG_1250,CpG_1251,CpG_1252,CpG_126,CpG_127,CpG_128,CpG_129,CpG_130,CpG_131,CpG_132,CpG_133,CpG_134,CpG_135,CpG_136,CpG_137,CpG_138,CpG_139,CpG_140,CpG_141,CpG_142,CpG_143,CpG_1…	Stoml3,Tiam1	Actl7a,Adcy6,Cyld,Dnaaf2,Dynlrb2,Gli1,Kif2a,Mdm1,Pde4c,Sept9,Stoml3,Tacr1,Tbc1d30,Tiam1
GO Cellular Component	GO:1902911	protein kinase complex	198	8.038802e-1	1.000000e+0	1.000000e+0	6.447619e-1	1.550960e+0	1	18	5.714286e-3	5.555556e-2	1	3	106	CpG_1693	CpG_1185,CpG_1186,CpG_1187,CpG_1188,CpG_1189,CpG_1190,CpG_1191,CpG_1192,CpG_1193,CpG_1194,CpG_1688,CpG_1689,CpG_1690,CpG_1691,CpG_1692,CpG_1693,CpG_856,CpG_857	Uvrag	Prkab2,Tbc1d5,Uvrag
GO Cellular Component	GO:0022626	cytosolic ribosome	198	8.038802e-1	1.000000e+0	1.000000e+0	6.447619e-1	1.550960e+0	1	18	5.714286e-3	5.555556e-2	1	3	135	CpG_1969	CpG_1965,CpG_1966,CpG_1967,CpG_1968,CpG_1969,CpG_1970,CpG_338,CpG_339,CpG_340,CpG_341,CpG_342,CpG_343,CpG_344,CpG_897,CpG_898,CpG_899,CpG_900,CpG_901	Rplp1	Rpl38,Rplp1,Rps14
GO Cellular Component	GO:0000792	heterochromatin	200	8.059683e-1	1.000000e+0	1.000000e+0	6.826891e-1	2.929591e+0	2	34	1.142857e-2	5.882353e-2	1	4	87	CpG_907,CpG_914	CpG_1105,CpG_1106,CpG_1107,CpG_1108,CpG_1109,CpG_1110,CpG_1111,CpG_1112,CpG_1113,CpG_363,CpG_364,CpG_365,CpG_366,CpG_367,CpG_368,CpG_369,CpG_370,CpG_371,CpG_372,CpG_373,CpG_374,CpG_375,CpG_376,CpG_377,CpG_856,CpG_857,CpG_907,CpG_908,CpG_909,CpG_910,CpG_911,CpG_912,CpG_913,CpG_914	Mbd2	Cbx8,Mbd2,Sall4,Satb1
GO Cellular Component	GO:0098552	side of membrane	201	8.090528e-1	1.000000e+0	1.000000e+0	7.105539e-1	4.222058e+0	3	49	1.714286e-2	6.122449e-2	2	10	495	CpG_766,CpG_949,CpG_953	CpG_1324,CpG_1325,CpG_1326,CpG_1327,CpG_1328,CpG_1329,CpG_1330,CpG_1331,CpG_1332,CpG_1333,CpG_1334,CpG_1412,CpG_1413,CpG_1414,CpG_1773,CpG_1774,CpG_1775,CpG_1776,CpG_1777,CpG_305,CpG_306,CpG_307,CpG_31,CpG_32,CpG_33,CpG_34,CpG_747,CpG_748,CpG_749,CpG_750,CpG_751,CpG_752,CpG_753,CpG_763,CpG_764,CpG_765,CpG_766,CpG_949,CpG_950,CpG_951,CpG_952,CpG_953,CpG_959,CpG_960,CpG_961,CpG_962,CpG_963,CpG_964,…	Cd5,Tiam1	Ccr7,Cd200r2,Cd200r4,Cd5,Cyld,Ece1,Fgf8,Ptprc,Tiam1,Yes1
GO Cellular Component	GO:0044455	mitochondrial membrane part	202	8.209299e-1	1.000000e+0	1.000000e+0	6.108271e-1	1.637125e+0	1	19	5.714286e-3	5.263158e-2	1	3	201	CpG_1322	CpG_1322,CpG_1323,CpG_240,CpG_241,CpG_242,CpG_243,CpG_244,CpG_245,CpG_246,CpG_247,CpG_248,CpG_249,CpG_250,CpG_251,CpG_252,CpG_494,CpG_495,CpG_496,CpG_497	Atpif1	Atpif1,Mcur1,Rhot1
GO Cellular Component	GO:0005884	actin filament	202	8.209299e-1	1.000000e+0	1.000000e+0	6.108271e-1	1.637125e+0	1	19	5.714286e-3	5.263158e-2	1	3	100	CpG_222	CpG_1412,CpG_1413,CpG_1414,CpG_218,CpG_219,CpG_220,CpG_221,CpG_222,CpG_223,CpG_569,CpG_570,CpG_571,CpG_572,CpG_573,CpG_574,CpG_575,CpG_576,CpG_577,CpG_578	Gas7	Bin3,Gas7,Yes1
GO Cellular Component	GO:0031225	anchored component of membrane	202	8.209299e-1	1.000000e+0	1.000000e+0	6.108271e-1	1.637125e+0	1	19	5.714286e-3	5.263158e-2	1	4	162	CpG_84	CpG_1000,CpG_1001,CpG_1002,CpG_1003,CpG_1004,CpG_1005,CpG_1670,CpG_1671,CpG_1749,CpG_1750,CpG_1751,CpG_1752,CpG_1753,CpG_1754,CpG_1755,CpG_1756,CpG_1757,CpG_83,CpG_84	Efna2	Efna2,Ntng2,Rab3a,Rgma
GO Cellular Component	GO:0005667	transcription factor complex	205	8.261985e-1	1.000000e+0	1.000000e+0	8.029111e-1	1.370015e+1	11	159	6.285714e-2	6.918239e-2	5	18	371	CpG_1307,CpG_1308,CpG_1309,CpG_1539,CpG_1540,CpG_1846,CpG_1848,CpG_257,CpG_258,CpG_259,CpG_476	CpG_1029,CpG_1030,CpG_1031,CpG_1032,CpG_1033,CpG_1034,CpG_1035,CpG_1036,CpG_1037,CpG_1038,CpG_1039,CpG_1040,CpG_1041,CpG_1042,CpG_1043,CpG_1044,CpG_1045,CpG_1046,CpG_1105,CpG_1106,CpG_1107,CpG_1108,CpG_1109,CpG_1110,CpG_1111,CpG_1112,CpG_1113,CpG_1239,CpG_1240,CpG_1241,CpG_1242,CpG_1243,CpG_1289,CpG_1290,CpG_1291,CpG_1292,CpG_1293,CpG_1294,CpG_1295,CpG_1296,CpG_1297,CpG_1298,CpG_1299,CpG_1300,CpG…	Dmbx1,Gata2,Rcor1,Tbx2,Zfhx3	Dmbx1,E2f4,Foxd3,Gata2,Gata6,Hand1,Hoxd12,Med6,Mef2a,Nr4a3,Nr5a2,Pparg,Rcor1,Sall4,Taf1b,Tbx2,Tcf12,Zfhx3
GO Cellular Component	GO:0044427	chromosomal part	206	8.272822e-1	1.000000e+0	1.000000e+0	7.853491e-1	1.145987e+1	9	133	5.142857e-2	6.766917e-2	5	20	965	CpG_1693,CpG_1927,CpG_21,CpG_22,CpG_257,CpG_258,CpG_259,CpG_907,CpG_914	CpG_1105,CpG_1106,CpG_1107,CpG_1108,CpG_1109,CpG_1110,CpG_1111,CpG_1112,CpG_1113,CpG_1180,CpG_1181,CpG_1182,CpG_1183,CpG_1184,CpG_1289,CpG_1290,CpG_1291,CpG_1292,CpG_1293,CpG_1294,CpG_1295,CpG_1296,CpG_1297,CpG_1298,CpG_1299,CpG_1300,CpG_1301,CpG_1453,CpG_1454,CpG_1455,CpG_1663,CpG_1664,CpG_1665,CpG_1666,CpG_1667,CpG_1668,CpG_1669,CpG_1688,CpG_1689,CpG_1690,CpG_1691,CpG_1692,CpG_1693,CpG_1720,CpG…	Bcas3,Mbd2,Spc24,Tnp1,Uvrag	Bcas3,Cbx8,Dclre1a,Ddx11,E2f4,Fank1,Foxd3,Gm16494,Hist2h2ab,Hist2h2be,Mbd2,Mef2a,Ncor2,Sall4,Satb1,Spc24,Syce1l,Tcf12,Tnp1,Uvrag
GO Cellular Component	GO:0019866	organelle inner membrane	207	8.310765e-1	1.000000e+0	1.000000e+0	6.447619e-1	3.101920e+0	2	36	1.142857e-2	5.555556e-2	2	7	467	CpG_1322,CpG_1433	CpG_1322,CpG_1323,CpG_1412,CpG_1413,CpG_1414,CpG_1431,CpG_1432,CpG_1433,CpG_1434,CpG_1435,CpG_1436,CpG_1437,CpG_1438,CpG_1439,CpG_1735,CpG_1736,CpG_1737,CpG_494,CpG_495,CpG_496,CpG_497,CpG_505,CpG_506,CpG_507,CpG_508,CpG_509,CpG_510,CpG_511,CpG_810,CpG_811,CpG_812,CpG_813,CpG_814,CpG_815,CpG_816,CpG_817	Atpif1,Sirt4	Atpif1,Fam169a,Mcur1,Mtch1,Pisd,Sirt4,Vdac3
GO Cellular Component	GO:0015934	large ribosomal subunit	208	8.365051e-1	1.000000e+0	1.000000e+0	5.802857e-1	1.723289e+0	1	20	5.714286e-3	5.000000e-2	1	3	136	CpG_1969	CpG_165,CpG_166,CpG_167,CpG_168,CpG_169,CpG_170,CpG_171,CpG_1965,CpG_1966,CpG_1967,CpG_1968,CpG_1969,CpG_1970,CpG_338,CpG_339,CpG_340,CpG_341,CpG_342,CpG_343,CpG_344	Rplp1	Npm1,Rpl38,Rplp1
GO Cellular Component	GO:0000785	chromatin	209	8.389717e-1	1.000000e+0	1.000000e+0	7.522222e-1	9.305761e+0	7	108	4.000000e-2	6.481481e-2	3	16	520	CpG_21,CpG_22,CpG_257,CpG_258,CpG_259,CpG_907,CpG_914	CpG_1105,CpG_1106,CpG_1107,CpG_1108,CpG_1109,CpG_1110,CpG_1111,CpG_1112,CpG_1113,CpG_1180,CpG_1181,CpG_1182,CpG_1183,CpG_1184,CpG_1289,CpG_1290,CpG_1291,CpG_1292,CpG_1293,CpG_1294,CpG_1295,CpG_1296,CpG_1297,CpG_1298,CpG_1299,CpG_1300,CpG_1301,CpG_1453,CpG_1454,CpG_1455,CpG_1663,CpG_1664,CpG_1665,CpG_1666,CpG_1667,CpG_1668,CpG_1669,CpG_1720,CpG_1721,CpG_1722,CpG_1723,CpG_1724,CpG_1725,CpG_1832,CpG…	Bcas3,Mbd2,Tnp1	Bcas3,Cbx8,Ddx11,E2f4,Fank1,Foxd3,Gm16494,Hist2h2ab,Hist2h2be,Mbd2,Mef2a,Ncor2,Sall4,Satb1,Tcf12,Tnp1
GO Cellular Component	GO:0009897	external side of plasma membrane	210	8.425060e-1	1.000000e+0	1.000000e+0	6.273359e-1	3.188085e+0	2	37	1.142857e-2	5.405405e-2	1	7	301	CpG_949,CpG_953	CpG_1324,CpG_1325,CpG_1326,CpG_1327,CpG_1328,CpG_1329,CpG_1330,CpG_1331,CpG_1332,CpG_1333,CpG_1334,CpG_305,CpG_306,CpG_307,CpG_31,CpG_32,CpG_33,CpG_34,CpG_747,CpG_748,CpG_749,CpG_750,CpG_751,CpG_752,CpG_753,CpG_949,CpG_950,CpG_951,CpG_952,CpG_953,CpG_959,CpG_960,CpG_961,CpG_962,CpG_963,CpG_964,CpG_965	Cd5	Ccr7,Cd200r2,Cd200r4,Cd5,Ece1,Fgf8,Ptprc
GO Cellular Component	GO:0098797	plasma membrane protein complex	211	8.507326e-1	1.000000e+0	1.000000e+0	5.526531e-1	1.809453e+0	1	21	5.714286e-3	4.761905e-2	1	4	230	CpG_207	CpG_1056,CpG_1057,CpG_1058,CpG_203,CpG_204,CpG_205,CpG_206,CpG_207,CpG_208,CpG_209,CpG_210,CpG_211,CpG_345,CpG_346,CpG_347,CpG_348,CpG_349,CpG_350,CpG_351,CpG_856,CpG_857	Wnt3a	Itgb4,Lin7c,Tbc1d5,Wnt3a
GO Cellular Component	GO:0005759	mitochondrial matrix	211	8.507326e-1	1.000000e+0	1.000000e+0	5.526531e-1	1.809453e+0	1	21	5.714286e-3	4.761905e-2	1	3	318	CpG_1433	CpG_1431,CpG_1432,CpG_1433,CpG_1434,CpG_1435,CpG_1436,CpG_1437,CpG_1438,CpG_1439,CpG_701,CpG_702,CpG_703,CpG_704,CpG_705,CpG_706,CpG_707,CpG_708,CpG_709,CpG_848,CpG_849,CpG_850	Sirt4	Mrps10,Sirt4,Yars2
GO Cellular Component	GO:0005813	centrosome	213	8.612352e-1	1.000000e+0	1.000000e+0	7.427657e-1	1.077056e+1	8	125	4.571429e-2	6.400000e-2	3	16	516	CpG_147,CpG_148,CpG_149,CpG_1640,CpG_1641,CpG_1642,CpG_1644,CpG_1693	CpG_1079,CpG_1080,CpG_1081,CpG_1082,CpG_115,CpG_116,CpG_117,CpG_118,CpG_1185,CpG_1186,CpG_1187,CpG_1188,CpG_1189,CpG_119,CpG_1190,CpG_1191,CpG_1192,CpG_1193,CpG_1194,CpG_147,CpG_148,CpG_149,CpG_1549,CpG_1550,CpG_1551,CpG_1552,CpG_1553,CpG_1640,CpG_1641,CpG_1642,CpG_1643,CpG_1644,CpG_165,CpG_166,CpG_167,CpG_168,CpG_1688,CpG_1689,CpG_169,CpG_1690,CpG_1691,CpG_1692,CpG_1693,CpG_1694,CpG_1695,CpG_169…	Sfi1,Tsks,Uvrag	Axin2,Cyld,Ddx11,Kif2a,Kiz,Map10,Mdm1,Npm1,Numa1,Pde4dip,Pibf1,Sfi1,Tsen2,Tsks,Tubg2,Uvrag
GO Cellular Component	GO:0099023	tethering complex	214	8.637285e-1	1.000000e+0	1.000000e+0	5.275325e-1	1.895618e+0	1	22	5.714286e-3	4.545455e-2	1	4	68	CpG_484	CpG_1593,CpG_1594,CpG_1832,CpG_1833,CpG_1834,CpG_1835,CpG_1836,CpG_1837,CpG_1838,CpG_479,CpG_480,CpG_481,CpG_482,CpG_483,CpG_484,CpG_485,CpG_614,CpG_615,CpG_616,CpG_617,CpG_618,CpG_619	Tnfaip2	Exoc3l,Exoc3l2,Sh3bp1,Tnfaip2
GO Cellular Component	GO:0031227	intrinsic component of endoplasmic reticulum membrane	214	8.637285e-1	1.000000e+0	1.000000e+0	5.275325e-1	1.895618e+0	1	22	5.714286e-3	4.545455e-2	1	2	136	CpG_27	CpG_1029,CpG_1030,CpG_1031,CpG_1032,CpG_1033,CpG_1034,CpG_1035,CpG_1036,CpG_1037,CpG_1038,CpG_1039,CpG_1040,CpG_1041,CpG_1042,CpG_1043,CpG_1044,CpG_1045,CpG_1046,CpG_27,CpG_28,CpG_29,CpG_30	Dnajb2	Dnajb2,Lnpk
GO Cellular Component	GO:0043195	terminal bouton	214	8.637285e-1	1.000000e+0	1.000000e+0	5.275325e-1	1.895618e+0	1	22	5.714286e-3	4.545455e-2	1	2	61	CpG_1866	CpG_1749,CpG_1750,CpG_1751,CpG_1752,CpG_1753,CpG_1754,CpG_1755,CpG_1756,CpG_1757,CpG_1856,CpG_1857,CpG_1858,CpG_1859,CpG_1860,CpG_1861,CpG_1862,CpG_1863,CpG_1864,CpG_1865,CpG_1866,CpG_1867,CpG_1868	Calb2	Calb2,Rab3a
GO Cellular Component	GO:0005604	basement membrane	214	8.637285e-1	1.000000e+0	1.000000e+0	5.275325e-1	1.895618e+0	1	22	5.714286e-3	4.545455e-2	1	3	94	CpG_640	CpG_1272,CpG_1273,CpG_1274,CpG_1275,CpG_1276,CpG_1277,CpG_1278,CpG_1279,CpG_1280,CpG_1281,CpG_1282,CpG_1283,CpG_345,CpG_346,CpG_347,CpG_348,CpG_349,CpG_350,CpG_351,CpG_640,CpG_641,CpG_642	Fbln1	Fbln1,Frem1,Itgb4
GO Cellular Component	GO:0000145	exocyst	214	8.637285e-1	1.000000e+0	1.000000e+0	5.275325e-1	1.895618e+0	1	22	5.714286e-3	4.545455e-2	1	4	19	CpG_484	CpG_1593,CpG_1594,CpG_1832,CpG_1833,CpG_1834,CpG_1835,CpG_1836,CpG_1837,CpG_1838,CpG_479,CpG_480,CpG_481,CpG_482,CpG_483,CpG_484,CpG_485,CpG_614,CpG_615,CpG_616,CpG_617,CpG_618,CpG_619	Tnfaip2	Exoc3l,Exoc3l2,Sh3bp1,Tnfaip2
GO Cellular Component	GO:0005578	proteinaceous extracellular matrix	219	8.780805e-1	1.000000e+0	1.000000e+0	6.747508e-1	7.410143e+0	5	86	2.857143e-2	5.813953e-2	4	12	349	CpG_1693,CpG_207,CpG_640,CpG_643,CpG_662	CpG_1217,CpG_1218,CpG_1272,CpG_1273,CpG_1274,CpG_1275,CpG_1276,CpG_1277,CpG_1278,CpG_1279,CpG_1280,CpG_1281,CpG_1282,CpG_1283,CpG_1688,CpG_1689,CpG_1690,CpG_1691,CpG_1692,CpG_1693,CpG_1869,CpG_1870,CpG_1871,CpG_203,CpG_204,CpG_205,CpG_206,CpG_207,CpG_208,CpG_209,CpG_210,CpG_211,CpG_345,CpG_346,CpG_347,CpG_348,CpG_349,CpG_350,CpG_351,CpG_640,CpG_641,CpG_642,CpG_643,CpG_644,CpG_645,CpG_646,CpG_647,…	Fbln1,Wnt11,Wnt3a,Wnt7b	Adamts18,Adamtsl5,Ccbe1,Fbln1,Frem1,Gp5,Itgb4,Wnt10b,Wnt11,Wnt2b,Wnt3a,Wnt7b
GO Cellular Component	GO:0098590	plasma membrane region	220	8.824718e-1	1.000000e+0	1.000000e+0	7.439560e-1	1.344165e+1	10	156	5.714286e-2	6.410256e-2	6	24	978	CpG_207,CpG_282,CpG_283,CpG_287,CpG_289,CpG_80,CpG_82,CpG_932,CpG_938,CpG_970	CpG_1056,CpG_1057,CpG_1058,CpG_1220,CpG_1222,CpG_1223,CpG_1224,CpG_1335,CpG_1336,CpG_1337,CpG_1338,CpG_1339,CpG_1340,CpG_1453,CpG_1454,CpG_1455,CpG_1458,CpG_1459,CpG_1460,CpG_1461,CpG_1462,CpG_1463,CpG_1464,CpG_1465,CpG_1466,CpG_1467,CpG_1468,CpG_1469,CpG_1470,CpG_1544,CpG_1545,CpG_1546,CpG_1547,CpG_1548,CpG_1645,CpG_1646,CpG_1647,CpG_1648,CpG_1649,CpG_1650,CpG_1651,CpG_1652,CpG_1653,CpG_1654,CpG…	Abca7,Arf1,Arhgap45,Neurl1a,Slc22a12,Srcin1	Abca7,Ahcyl1,Arf1,Arhgap45,Cadm1,Camk2n1,Cldn4,Ddx58,Fgd5,Gabra5,Grik1,Itgb4,Kcne1,Lin7c,Mtcl1,Neurl1a,Nod2,Prr7,Robo1,Scarb1,Sh3bp1,Slc22a12,Srcin1,Stx1a
GO Cellular Component	GO:0044456	synapse part	221	8.898157e-1	1.000000e+0	1.000000e+0	7.253571e-1	1.240768e+1	9	144	5.142857e-2	6.250000e-2	6	17	697	CpG_1866,CpG_207,CpG_235,CpG_27,CpG_282,CpG_283,CpG_287,CpG_289,CpG_970	CpG_1056,CpG_1057,CpG_1058,CpG_1335,CpG_1336,CpG_1337,CpG_1338,CpG_1339,CpG_1340,CpG_1469,CpG_1470,CpG_1645,CpG_1646,CpG_1647,CpG_1648,CpG_1649,CpG_1650,CpG_1651,CpG_1652,CpG_1653,CpG_1654,CpG_1655,CpG_1656,CpG_1657,CpG_1658,CpG_1749,CpG_1750,CpG_1751,CpG_1752,CpG_1753,CpG_1754,CpG_1755,CpG_1756,CpG_1757,CpG_1785,CpG_1786,CpG_1787,CpG_1788,CpG_1789,CpG_1790,CpG_1791,CpG_1792,CpG_1793,CpG_1794,CpG…	Arf1,Calb2,Doc2b,Neurl1a,Ptprn,Srcin1	Arf1,Bdnf,Cadm1,Calb2,Camk2n1,Cdh8,Doc2b,Gabra5,Grik1,Kcnn2,Lin7c,Neurl1a,Prr7,Ptprn,Rab3a,Srcin1,Stx1a
GO Cellular Component	GO:0005925	focal adhesion	222	8.965130e-1	1.000000e+0	1.000000e+0	5.901211e-1	5.083703e+0	3	59	1.714286e-2	5.084746e-2	2	10	386	CpG_207,CpG_21,CpG_22	CpG_1412,CpG_1413,CpG_1414,CpG_165,CpG_166,CpG_167,CpG_168,CpG_169,CpG_170,CpG_171,CpG_19,CpG_20,CpG_203,CpG_204,CpG_205,CpG_206,CpG_207,CpG_208,CpG_209,CpG_21,CpG_210,CpG_211,CpG_22,CpG_23,CpG_24,CpG_25,CpG_26,CpG_305,CpG_306,CpG_307,CpG_31,CpG_317,CpG_318,CpG_319,CpG_32,CpG_320,CpG_321,CpG_322,CpG_323,CpG_324,CpG_325,CpG_326,CpG_33,CpG_338,CpG_339,CpG_34,CpG_340,CpG_341,CpG_342,CpG_343,CpG_344,…	Arf1,Tns1	Arf1,Fzd2,Npm1,Pcbp2,Ptprc,Rpl38,Rps14,Tns1,Tns4,Yes1
GO Cellular Component	GO:0005924	cell-substrate adherens junction	222	8.965130e-1	1.000000e+0	1.000000e+0	5.901211e-1	5.083703e+0	3	59	1.714286e-2	5.084746e-2	2	10	391	CpG_207,CpG_21,CpG_22	CpG_1412,CpG_1413,CpG_1414,CpG_165,CpG_166,CpG_167,CpG_168,CpG_169,CpG_170,CpG_171,CpG_19,CpG_20,CpG_203,CpG_204,CpG_205,CpG_206,CpG_207,CpG_208,CpG_209,CpG_21,CpG_210,CpG_211,CpG_22,CpG_23,CpG_24,CpG_25,CpG_26,CpG_305,CpG_306,CpG_307,CpG_31,CpG_317,CpG_318,CpG_319,CpG_32,CpG_320,CpG_321,CpG_322,CpG_323,CpG_324,CpG_325,CpG_326,CpG_33,CpG_338,CpG_339,CpG_34,CpG_340,CpG_341,CpG_342,CpG_343,CpG_344,…	Arf1,Tns1	Arf1,Fzd2,Npm1,Pcbp2,Ptprc,Rpl38,Rps14,Tns1,Tns4,Yes1
GO Cellular Component	GO:0009986	cell surface	224	9.003679e-1	1.000000e+0	1.000000e+0	7.253571e-1	1.378631e+1	10	160	5.714286e-2	6.250000e-2	7	25	822	CpG_1322,CpG_1433,CpG_207,CpG_566,CpG_643,CpG_662,CpG_80,CpG_82,CpG_949,CpG_953	CpG_1322,CpG_1323,CpG_1324,CpG_1325,CpG_1326,CpG_1327,CpG_1328,CpG_1329,CpG_1330,CpG_1331,CpG_1332,CpG_1333,CpG_1334,CpG_1431,CpG_1432,CpG_1433,CpG_1434,CpG_1435,CpG_1436,CpG_1437,CpG_1438,CpG_1439,CpG_1453,CpG_1454,CpG_1455,CpG_1518,CpG_1519,CpG_1520,CpG_1521,CpG_1670,CpG_1671,CpG_1672,CpG_1673,CpG_1674,CpG_1675,CpG_1676,CpG_1677,CpG_1678,CpG_1679,CpG_1680,CpG_1681,CpG_1682,CpG_1683,CpG_1684,CpG…	Abca7,Atpif1,Cd5,Pla2g1b,Scara5,Wnt3a,Wnt7b	Abca7,Atpif1,Ccr7,Cd200r2,Cd200r4,Cd5,Ciita,Clmp,Ece1,Fgf8,Gp5,Itgb4,Nod2,Pla2g1b,Ptprc,Rgma,Robo1,Scara5,Scarb1,Sh3bp1,Tacr1,Trpv2,Wdr73,Wnt3a,Wnt7b
GO Cellular Component	GO:0045171	intercellular bridge	225	9.053853e-1	1.000000e+0	1.000000e+0	4.463736e-1	2.240276e+0	1	26	5.714286e-3	3.846154e-2	1	3	44	CpG_1322	CpG_1322,CpG_1323,CpG_1742,CpG_1743,CpG_1744,CpG_1745,CpG_1746,CpG_1747,CpG_1748,CpG_2012,CpG_2013,CpG_2014,CpG_2015,CpG_2016,CpG_2017,CpG_2018,CpG_2019,CpG_2020,CpG_2021,CpG_2022,CpG_2023,CpG_2024,CpG_2025,CpG_2026,CpG_2027,CpG_2028	Dnajc8	Dnajc8,Foxl2,Rfxank
GO Cellular Component	GO:0030136	clathrin-coated vesicle	226	9.136434e-1	1.000000e+0	1.000000e+0	4.298413e-1	2.326440e+0	1	27	5.714286e-3	3.703704e-2	1	4	99	CpG_260	CpG_1324,CpG_1325,CpG_1326,CpG_1327,CpG_1328,CpG_1329,CpG_1330,CpG_1331,CpG_1332,CpG_1333,CpG_1334,CpG_260,CpG_261,CpG_43,CpG_44,CpG_45,CpG_46,CpG_47,CpG_48,CpG_49,CpG_50,CpG_51,CpG_52,CpG_53,CpG_54,CpG_856,CpG_857	Epn3	Clvs2,Ece1,Epn3,Tbc1d5
GO Cellular Component	GO:0044391	ribosomal subunit	227	9.211846e-1	1.000000e+0	1.000000e+0	4.144898e-1	2.412605e+0	1	28	5.714286e-3	3.571429e-2	1	5	212	CpG_1969	CpG_165,CpG_166,CpG_167,CpG_168,CpG_169,CpG_170,CpG_171,CpG_1965,CpG_1966,CpG_1967,CpG_1968,CpG_1969,CpG_1970,CpG_338,CpG_339,CpG_340,CpG_341,CpG_342,CpG_343,CpG_344,CpG_848,CpG_849,CpG_850,CpG_897,CpG_898,CpG_899,CpG_900,CpG_901	Rplp1	Mrps10,Npm1,Rpl38,Rplp1,Rps14
GO Cellular Component	GO:0005840	ribosome	227	9.211846e-1	1.000000e+0	1.000000e+0	4.144898e-1	2.412605e+0	1	28	5.714286e-3	3.571429e-2	1	5	259	CpG_1969	CpG_165,CpG_166,CpG_167,CpG_168,CpG_169,CpG_170,CpG_171,CpG_1965,CpG_1966,CpG_1967,CpG_1968,CpG_1969,CpG_1970,CpG_338,CpG_339,CpG_340,CpG_341,CpG_342,CpG_343,CpG_344,CpG_848,CpG_849,CpG_850,CpG_897,CpG_898,CpG_899,CpG_900,CpG_901	Rplp1	Mrps10,Npm1,Rpl38,Rplp1,Rps14
GO Cellular Component	GO:0044420	extracellular matrix component	229	9.280706e-1	1.000000e+0	1.000000e+0	4.001970e-1	2.498769e+0	1	29	5.714286e-3	3.448276e-2	1	4	119	CpG_640	CpG_1272,CpG_1273,CpG_1274,CpG_1275,CpG_1276,CpG_1277,CpG_1278,CpG_1279,CpG_1280,CpG_1281,CpG_1282,CpG_1283,CpG_345,CpG_346,CpG_347,CpG_348,CpG_349,CpG_350,CpG_351,CpG_640,CpG_641,CpG_642,CpG_85,CpG_86,CpG_87,CpG_88,CpG_89,CpG_90,CpG_91	Fbln1	Adamtsl5,Fbln1,Frem1,Itgb4
GO Cellular Component	GO:0048471	perinuclear region of cytoplasm	230	9.289806e-1	1.000000e+0	1.000000e+0	6.044643e-1	8.271787e+0	5	96	2.857143e-2	5.208333e-2	5	15	641	CpG_207,CpG_260,CpG_262,CpG_640,CpG_970	CpG_1056,CpG_1057,CpG_1058,CpG_1059,CpG_1060,CpG_1061,CpG_1062,CpG_1063,CpG_1064,CpG_1065,CpG_1066,CpG_1067,CpG_1083,CpG_1084,CpG_1085,CpG_1086,CpG_1087,CpG_1088,CpG_1089,CpG_1090,CpG_1091,CpG_1092,CpG_1093,CpG_1094,CpG_1095,CpG_1096,CpG_1097,CpG_1098,CpG_1131,CpG_1132,CpG_1133,CpG_1134,CpG_1135,CpG_1136,CpG_1137,CpG_1220,CpG_1253,CpG_1254,CpG_1255,CpG_1256,CpG_1257,CpG_1258,CpG_1259,CpG_1260,CpG…	Arf1,Atxn10,Epn3,Neurl1a,Osbpl7	Arf1,Atxn10,Bdnf,Csf1,Cyld,Ece1,Epn3,Kcns1,Meis2,Neurl1a,Osbpl7,Prr7,Rasef,Sept9,Tpd52
GO Cellular Component	GO:0099081	supramolecular polymer	231	9.294635e-1	1.000000e+0	1.000000e+0	6.908163e-1	1.447563e+1	10	168	5.714286e-2	5.952381e-2	5	26	922	CpG_207,CpG_222,CpG_257,CpG_258,CpG_259,CpG_766,CpG_890,CpG_891,CpG_892,CpG_894	CpG_1077,CpG_1078,CpG_115,CpG_116,CpG_117,CpG_118,CpG_1185,CpG_1186,CpG_1187,CpG_1188,CpG_1189,CpG_119,CpG_1190,CpG_1191,CpG_1192,CpG_1193,CpG_1194,CpG_1341,CpG_1342,CpG_1343,CpG_1344,CpG_1345,CpG_1346,CpG_1347,CpG_1412,CpG_1413,CpG_1414,CpG_1694,CpG_1695,CpG_1696,CpG_1697,CpG_1698,CpG_1699,CpG_1773,CpG_1774,CpG_1775,CpG_1776,CpG_1777,CpG_1872,CpG_1873,CpG_1874,CpG_1881,CpG_1882,CpG_1883,CpG_1884…	Arf1,Bcas3,Bin1,Gas7,Tiam1	Adamtsl5,Arf1,Bcas3,Bcl2l11,Bin1,Bin3,Clmp,Cyld,Dynlrb2,Gas7,Gm21969,Iffo2,Kcne1,Kcnn2,Kif2a,Lman1,Map10,Mdm1,Numa1,Pde4dip,Reep3,Sept9,Tcap,Tiam1,Tubg2,Yes1
GO Cellular Component	GO:0099512	supramolecular fiber	231	9.294635e-1	1.000000e+0	1.000000e+0	6.908163e-1	1.447563e+1	10	168	5.714286e-2	5.952381e-2	5	26	916	CpG_207,CpG_222,CpG_257,CpG_258,CpG_259,CpG_766,CpG_890,CpG_891,CpG_892,CpG_894	CpG_1077,CpG_1078,CpG_115,CpG_116,CpG_117,CpG_118,CpG_1185,CpG_1186,CpG_1187,CpG_1188,CpG_1189,CpG_119,CpG_1190,CpG_1191,CpG_1192,CpG_1193,CpG_1194,CpG_1341,CpG_1342,CpG_1343,CpG_1344,CpG_1345,CpG_1346,CpG_1347,CpG_1412,CpG_1413,CpG_1414,CpG_1694,CpG_1695,CpG_1696,CpG_1697,CpG_1698,CpG_1699,CpG_1773,CpG_1774,CpG_1775,CpG_1776,CpG_1777,CpG_1872,CpG_1873,CpG_1874,CpG_1881,CpG_1882,CpG_1883,CpG_1884…	Arf1,Bcas3,Bin1,Gas7,Tiam1	Adamtsl5,Arf1,Bcas3,Bcl2l11,Bin1,Bin3,Clmp,Cyld,Dynlrb2,Gas7,Gm21969,Iffo2,Kcne1,Kcnn2,Kif2a,Lman1,Map10,Mdm1,Numa1,Pde4dip,Reep3,Sept9,Tcap,Tiam1,Tubg2,Yes1
GO Cellular Component	GO:0099080	supramolecular complex	231	9.294635e-1	1.000000e+0	1.000000e+0	6.908163e-1	1.447563e+1	10	168	5.714286e-2	5.952381e-2	5	26	923	CpG_207,CpG_222,CpG_257,CpG_258,CpG_259,CpG_766,CpG_890,CpG_891,CpG_892,CpG_894	CpG_1077,CpG_1078,CpG_115,CpG_116,CpG_117,CpG_118,CpG_1185,CpG_1186,CpG_1187,CpG_1188,CpG_1189,CpG_119,CpG_1190,CpG_1191,CpG_1192,CpG_1193,CpG_1194,CpG_1341,CpG_1342,CpG_1343,CpG_1344,CpG_1345,CpG_1346,CpG_1347,CpG_1412,CpG_1413,CpG_1414,CpG_1694,CpG_1695,CpG_1696,CpG_1697,CpG_1698,CpG_1699,CpG_1773,CpG_1774,CpG_1775,CpG_1776,CpG_1777,CpG_1872,CpG_1873,CpG_1874,CpG_1881,CpG_1882,CpG_1883,CpG_1884…	Arf1,Bcas3,Bin1,Gas7,Tiam1	Adamtsl5,Arf1,Bcas3,Bcl2l11,Bin1,Bin3,Clmp,Cyld,Dynlrb2,Gas7,Gm21969,Iffo2,Kcne1,Kcnn2,Kif2a,Lman1,Map10,Mdm1,Numa1,Pde4dip,Reep3,Sept9,Tcap,Tiam1,Tubg2,Yes1
GO Cellular Component	GO:0030055	cell-substrate junction	234	9.343727e-1	1.000000e+0	1.000000e+0	5.275325e-1	5.686854e+0	3	66	1.714286e-2	4.545455e-2	2	11	396	CpG_207,CpG_21,CpG_22	CpG_1412,CpG_1413,CpG_1414,CpG_165,CpG_166,CpG_167,CpG_168,CpG_169,CpG_170,CpG_171,CpG_19,CpG_20,CpG_203,CpG_204,CpG_205,CpG_206,CpG_207,CpG_208,CpG_209,CpG_21,CpG_210,CpG_211,CpG_22,CpG_23,CpG_24,CpG_25,CpG_26,CpG_305,CpG_306,CpG_307,CpG_31,CpG_317,CpG_318,CpG_319,CpG_32,CpG_320,CpG_321,CpG_322,CpG_323,CpG_324,CpG_325,CpG_326,CpG_33,CpG_338,CpG_339,CpG_34,CpG_340,CpG_341,CpG_342,CpG_343,CpG_344,…	Arf1,Tns1	Arf1,Fzd2,Itgb4,Npm1,Pcbp2,Ptprc,Rpl38,Rps14,Tns1,Tns4,Yes1
GO Cellular Component	GO:0005881	cytoplasmic microtubule	234	9.343727e-1	1.000000e+0	1.000000e+0	5.275325e-1	5.686854e+0	3	66	1.714286e-2	4.545455e-2	1	6	60	CpG_257,CpG_258,CpG_259	CpG_1694,CpG_1695,CpG_1696,CpG_1697,CpG_1698,CpG_1699,CpG_1773,CpG_1774,CpG_1775,CpG_1776,CpG_1777,CpG_1881,CpG_1882,CpG_1883,CpG_1884,CpG_1885,CpG_1886,CpG_1887,CpG_1888,CpG_1889,CpG_1890,CpG_1891,CpG_1892,CpG_1893,CpG_1894,CpG_1895,CpG_1896,CpG_1897,CpG_1898,CpG_1899,CpG_1900,CpG_1901,CpG_1902,CpG_1903,CpG_1904,CpG_1905,CpG_1906,CpG_1907,CpG_1908,CpG_1909,CpG_1910,CpG_1911,CpG_1912,CpG_1913,CpG…	Bcas3	Bcas3,Clmp,Cyld,Map10,Numa1,Tubg2
GO Cellular Component	GO:0044306	neuron projection terminus	236	9.390663e-1	1.000000e+0	1.000000e+0	4.642286e-1	4.308223e+0	2	50	1.142857e-2	4.000000e-2	2	4	131	CpG_1866,CpG_27	CpG_1749,CpG_1750,CpG_1751,CpG_1752,CpG_1753,CpG_1754,CpG_1755,CpG_1756,CpG_1757,CpG_1785,CpG_1786,CpG_1787,CpG_1788,CpG_1789,CpG_1790,CpG_1791,CpG_1792,CpG_1793,CpG_1794,CpG_1795,CpG_1796,CpG_1797,CpG_1798,CpG_1799,CpG_1800,CpG_1801,CpG_1802,CpG_1803,CpG_1804,CpG_1805,CpG_1806,CpG_1807,CpG_1808,CpG_1856,CpG_1857,CpG_1858,CpG_1859,CpG_1860,CpG_1861,CpG_1862,CpG_1863,CpG_1864,CpG_1865,CpG_1866,CpG…	Calb2,Ptprn	Calb2,Cdh8,Ptprn,Rab3a
GO Cellular Component	GO:0043679	axon terminus	236	9.390663e-1	1.000000e+0	1.000000e+0	4.642286e-1	4.308223e+0	2	50	1.142857e-2	4.000000e-2	2	4	118	CpG_1866,CpG_27	CpG_1749,CpG_1750,CpG_1751,CpG_1752,CpG_1753,CpG_1754,CpG_1755,CpG_1756,CpG_1757,CpG_1785,CpG_1786,CpG_1787,CpG_1788,CpG_1789,CpG_1790,CpG_1791,CpG_1792,CpG_1793,CpG_1794,CpG_1795,CpG_1796,CpG_1797,CpG_1798,CpG_1799,CpG_1800,CpG_1801,CpG_1802,CpG_1803,CpG_1804,CpG_1805,CpG_1806,CpG_1807,CpG_1808,CpG_1856,CpG_1857,CpG_1858,CpG_1859,CpG_1860,CpG_1861,CpG_1862,CpG_1863,CpG_1864,CpG_1865,CpG_1866,CpG…	Calb2,Ptprn	Calb2,Cdh8,Ptprn,Rab3a
GO Cellular Component	GO:0044448	cell cortex part	238	9.400989e-1	1.000000e+0	1.000000e+0	3.743779e-1	2.671098e+0	1	31	5.714286e-3	3.225806e-2	1	6	149	CpG_484	CpG_1593,CpG_1594,CpG_1694,CpG_1695,CpG_1696,CpG_1697,CpG_1698,CpG_1699,CpG_1832,CpG_1833,CpG_1834,CpG_1835,CpG_1836,CpG_1837,CpG_1838,CpG_355,CpG_356,CpG_357,CpG_479,CpG_480,CpG_481,CpG_482,CpG_483,CpG_484,CpG_485,CpG_614,CpG_615,CpG_616,CpG_617,CpG_618,CpG_619	Tnfaip2	Exoc3l,Exoc3l2,Numa1,Sept9,Sh3bp1,Tnfaip2
GO Cellular Component	GO:0005815	microtubule organizing center	239	9.413367e-1	1.000000e+0	1.000000e+0	6.610850e-1	1.361398e+1	9	158	5.142857e-2	5.696203e-2	4	20	675	CpG_147,CpG_148,CpG_149,CpG_1640,CpG_1641,CpG_1642,CpG_1644,CpG_1693,CpG_927	CpG_1079,CpG_1080,CpG_1081,CpG_1082,CpG_115,CpG_116,CpG_117,CpG_118,CpG_1185,CpG_1186,CpG_1187,CpG_1188,CpG_1189,CpG_119,CpG_1190,CpG_1191,CpG_1192,CpG_1193,CpG_1194,CpG_120,CpG_121,CpG_122,CpG_123,CpG_124,CpG_125,CpG_126,CpG_127,CpG_128,CpG_129,CpG_130,CpG_131,CpG_132,CpG_133,CpG_134,CpG_135,CpG_1412,CpG_1413,CpG_1414,CpG_147,CpG_148,CpG_149,CpG_1549,CpG_1550,CpG_1551,CpG_1552,CpG_1553,CpG_1640,…	Scyl1,Sfi1,Tsks,Uvrag	Axin2,Cyld,Ddx11,Dnaaf2,Kif2a,Kiz,Map10,Mdm1,Npm1,Numa1,Pde4dip,Pibf1,Scyl1,Sfi1,Tbc1d30,Tsen2,Tsks,Tubg2,Uvrag,Yes1
GO Cellular Component	GO:1990904	ribonucleoprotein complex	240	9.425804e-1	1.000000e+0	1.000000e+0	5.120168e-1	5.859183e+0	3	68	1.714286e-2	4.411765e-2	2	10	850	CpG_1636,CpG_1637,CpG_1969	CpG_1029,CpG_1030,CpG_1031,CpG_1032,CpG_1033,CpG_1034,CpG_1035,CpG_1036,CpG_1037,CpG_1038,CpG_1039,CpG_1040,CpG_1041,CpG_1042,CpG_1043,CpG_1044,CpG_1045,CpG_1046,CpG_1047,CpG_1048,CpG_1049,CpG_1050,CpG_1051,CpG_1052,CpG_1635,CpG_1636,CpG_1637,CpG_165,CpG_166,CpG_167,CpG_168,CpG_169,CpG_170,CpG_171,CpG_1720,CpG_1721,CpG_1722,CpG_1723,CpG_1724,CpG_1725,CpG_1965,CpG_1966,CpG_1967,CpG_1968,CpG_1969,C…	Lsm14a,Rplp1	Dhx32,Hoxd10,Lsm14a,Mrps10,Npm1,Pcbp2,Prpf4b,Rpl38,Rplp1,Rps14
GO Cellular Component	GO:0030529	intracellular ribonucleoprotein complex	240	9.425804e-1	1.000000e+0	1.000000e+0	5.120168e-1	5.859183e+0	3	68	1.714286e-2	4.411765e-2	2	10	848	CpG_1636,CpG_1637,CpG_1969	CpG_1029,CpG_1030,CpG_1031,CpG_1032,CpG_1033,CpG_1034,CpG_1035,CpG_1036,CpG_1037,CpG_1038,CpG_1039,CpG_1040,CpG_1041,CpG_1042,CpG_1043,CpG_1044,CpG_1045,CpG_1046,CpG_1047,CpG_1048,CpG_1049,CpG_1050,CpG_1051,CpG_1052,CpG_1635,CpG_1636,CpG_1637,CpG_165,CpG_166,CpG_167,CpG_168,CpG_169,CpG_170,CpG_171,CpG_1720,CpG_1721,CpG_1722,CpG_1723,CpG_1724,CpG_1725,CpG_1965,CpG_1966,CpG_1967,CpG_1968,CpG_1969,C…	Lsm14a,Rplp1	Dhx32,Hoxd10,Lsm14a,Mrps10,Npm1,Pcbp2,Prpf4b,Rpl38,Rplp1,Rps14
GO Cellular Component	GO:0000790	nuclear chromatin	242	9.517492e-1	1.000000e+0	1.000000e+0	5.335961e-1	7.496307e+0	4	87	2.285714e-2	4.597701e-2	2	11	341	CpG_21,CpG_22,CpG_907,CpG_914	CpG_1180,CpG_1181,CpG_1182,CpG_1183,CpG_1184,CpG_1289,CpG_1290,CpG_1291,CpG_1292,CpG_1293,CpG_1294,CpG_1295,CpG_1296,CpG_1297,CpG_1298,CpG_1299,CpG_1300,CpG_1301,CpG_1453,CpG_1454,CpG_1455,CpG_1663,CpG_1664,CpG_1665,CpG_1666,CpG_1667,CpG_1668,CpG_1669,CpG_1832,CpG_1833,CpG_1834,CpG_1835,CpG_1836,CpG_1837,CpG_1838,CpG_19,CpG_1979,CpG_1980,CpG_1981,CpG_1982,CpG_1983,CpG_1984,CpG_1985,CpG_1986,CpG_1…	Mbd2,Tnp1	Cbx8,Ddx11,E2f4,Foxd3,Hist2h2ab,Mbd2,Mef2a,Ncor2,Satb1,Tcf12,Tnp1
GO Cellular Component	GO:0061695	transferase complex, transferring phosphorus-containing groups	243	9.584816e-1	1.000000e+0	1.000000e+0	3.315918e-1	3.015756e+0	1	35	5.714286e-3	2.857143e-2	1	6	265	CpG_1693	CpG_1185,CpG_1186,CpG_1187,CpG_1188,CpG_1189,CpG_1190,CpG_1191,CpG_1192,CpG_1193,CpG_1194,CpG_1688,CpG_1689,CpG_1690,CpG_1691,CpG_1692,CpG_1693,CpG_1710,CpG_1711,CpG_1712,CpG_1713,CpG_1714,CpG_1715,CpG_1716,CpG_1717,CpG_1718,CpG_1719,CpG_457,CpG_458,CpG_459,CpG_460,CpG_461,CpG_462,CpG_463,CpG_856,CpG_857	Uvrag	Esrrb,Med6,Prkab2,Tbc1d5,Uvrag,Zfp768
GO Cellular Component	GO:0005802	trans-Golgi network	244	9.621217e-1	1.000000e+0	1.000000e+0	3.223810e-1	3.101920e+0	1	36	5.714286e-3	2.777778e-2	1	4	173	CpG_207	CpG_1163,CpG_1164,CpG_1165,CpG_1166,CpG_1167,CpG_1168,CpG_1169,CpG_1170,CpG_1171,CpG_1172,CpG_1173,CpG_1174,CpG_1962,CpG_1963,CpG_1964,CpG_203,CpG_204,CpG_205,CpG_206,CpG_207,CpG_208,CpG_209,CpG_210,CpG_211,CpG_43,CpG_44,CpG_45,CpG_46,CpG_47,CpG_48,CpG_49,CpG_50,CpG_51,CpG_52,CpG_53,CpG_54	Arf1	Arf1,Clvs2,Lrba,Scamp2
GO Cellular Component	GO:0044445	cytosolic part	245	9.654444e-1	1.000000e+0	1.000000e+0	3.136680e-1	3.188085e+0	1	37	5.714286e-3	2.702703e-2	1	7	263	CpG_1969	CpG_1593,CpG_1594,CpG_1726,CpG_1727,CpG_1728,CpG_1729,CpG_1742,CpG_1743,CpG_1744,CpG_1745,CpG_1746,CpG_1747,CpG_1748,CpG_1965,CpG_1966,CpG_1967,CpG_1968,CpG_1969,CpG_1970,CpG_338,CpG_339,CpG_340,CpG_341,CpG_342,CpG_343,CpG_344,CpG_664,CpG_665,CpG_666,CpG_667,CpG_668,CpG_669,CpG_897,CpG_898,CpG_899,CpG_900,CpG_901	Rplp1	Adcy6,Bloc1s3,Borcs8,Nlrp6,Rpl38,Rplp1,Rps14
GO Cellular Component	GO:0070382	exocytic vesicle	246	9.684771e-1	1.000000e+0	1.000000e+0	3.054135e-1	3.274249e+0	1	38	5.714286e-3	2.631579e-2	1	4	168	CpG_235	CpG_1469,CpG_1470,CpG_1749,CpG_1750,CpG_1751,CpG_1752,CpG_1753,CpG_1754,CpG_1755,CpG_1756,CpG_1757,CpG_1941,CpG_1942,CpG_1943,CpG_1944,CpG_1945,CpG_1946,CpG_1947,CpG_1948,CpG_1949,CpG_1950,CpG_1951,CpG_1952,CpG_1953,CpG_1954,CpG_1955,CpG_1956,CpG_1957,CpG_1958,CpG_1959,CpG_1960,CpG_1961,CpG_234,CpG_235,CpG_236,CpG_237,CpG_238,CpG_239	Doc2b	Cadm1,Doc2b,Rab3a,Stx1a
GO Cellular Component	GO:0005774	vacuolar membrane	247	9.737712e-1	1.000000e+0	1.000000e+0	2.901429e-1	3.446578e+0	1	40	5.714286e-3	2.500000e-2	1	7	309	CpG_184	CpG_1324,CpG_1325,CpG_1326,CpG_1327,CpG_1328,CpG_1329,CpG_1330,CpG_1331,CpG_1332,CpG_1333,CpG_1334,CpG_1401,CpG_1402,CpG_1403,CpG_1404,CpG_1405,CpG_1406,CpG_1453,CpG_1454,CpG_1455,CpG_1518,CpG_1519,CpG_1520,CpG_1521,CpG_1742,CpG_1743,CpG_1744,CpG_1745,CpG_1746,CpG_1747,CpG_1748,CpG_184,CpG_185,CpG_186,CpG_187,CpG_188,CpG_189,CpG_293,CpG_294,CpG_295	Irgm1	Borcs8,Ece1,Eva1a,Irgm1,Scarb1,Slc35f6,Stard3
GO Cellular Component	GO:0044437	vacuolar part	247	9.737712e-1	1.000000e+0	1.000000e+0	2.901429e-1	3.446578e+0	1	40	5.714286e-3	2.500000e-2	1	7	324	CpG_184	CpG_1324,CpG_1325,CpG_1326,CpG_1327,CpG_1328,CpG_1329,CpG_1330,CpG_1331,CpG_1332,CpG_1333,CpG_1334,CpG_1401,CpG_1402,CpG_1403,CpG_1404,CpG_1405,CpG_1406,CpG_1453,CpG_1454,CpG_1455,CpG_1518,CpG_1519,CpG_1520,CpG_1521,CpG_1742,CpG_1743,CpG_1744,CpG_1745,CpG_1746,CpG_1747,CpG_1748,CpG_184,CpG_185,CpG_186,CpG_187,CpG_188,CpG_189,CpG_293,CpG_294,CpG_295	Irgm1	Borcs8,Ece1,Eva1a,Irgm1,Scarb1,Slc35f6,Stard3
GO Cellular Component	GO:0005765	lysosomal membrane	247	9.737712e-1	1.000000e+0	1.000000e+0	2.901429e-1	3.446578e+0	1	40	5.714286e-3	2.500000e-2	1	7	261	CpG_184	CpG_1324,CpG_1325,CpG_1326,CpG_1327,CpG_1328,CpG_1329,CpG_1330,CpG_1331,CpG_1332,CpG_1333,CpG_1334,CpG_1401,CpG_1402,CpG_1403,CpG_1404,CpG_1405,CpG_1406,CpG_1453,CpG_1454,CpG_1455,CpG_1518,CpG_1519,CpG_1520,CpG_1521,CpG_1742,CpG_1743,CpG_1744,CpG_1745,CpG_1746,CpG_1747,CpG_1748,CpG_184,CpG_185,CpG_186,CpG_187,CpG_188,CpG_189,CpG_293,CpG_294,CpG_295	Irgm1	Borcs8,Ece1,Eva1a,Irgm1,Scarb1,Slc35f6,Stard3
GO Cellular Component	GO:0030133	transport vesicle	250	9.738866e-1	1.000000e+0	1.000000e+0	3.805152e-1	5.256032e+0	2	61	1.142857e-2	3.278689e-2	3	11	298	CpG_235,CpG_27	CpG_1469,CpG_1470,CpG_1593,CpG_1594,CpG_1749,CpG_1750,CpG_1751,CpG_1752,CpG_1753,CpG_1754,CpG_1755,CpG_1756,CpG_1757,CpG_1832,CpG_1833,CpG_1834,CpG_1835,CpG_1836,CpG_1837,CpG_1838,CpG_1941,CpG_1942,CpG_1943,CpG_1944,CpG_1945,CpG_1946,CpG_1947,CpG_1948,CpG_1949,CpG_1950,CpG_1951,CpG_1952,CpG_1953,CpG_1954,CpG_1955,CpG_1956,CpG_1957,CpG_1958,CpG_1959,CpG_1960,CpG_1961,CpG_1962,CpG_1963,CpG_1964,CpG…	Doc2b,Ptprn,Rph3al	Bloc1s3,Cadm1,Doc2b,Exoc3l,Lman1,Nrsn1,Ptprn,Rab3a,Rph3al,Scamp2,Stx1a
GO Cellular Component	GO:0043296	apical junction complex	251	9.801002e-1	1.000000e+0	1.000000e+0	2.699003e-1	3.705071e+0	1	43	5.714286e-3	2.325581e-2	1	7	152	CpG_315	CpG_1056,CpG_1057,CpG_1058,CpG_1222,CpG_1223,CpG_1224,CpG_1458,CpG_1459,CpG_1460,CpG_1461,CpG_1462,CpG_1463,CpG_1464,CpG_1465,CpG_1466,CpG_1467,CpG_1468,CpG_1930,CpG_1931,CpG_1932,CpG_1933,CpG_1934,CpG_1935,CpG_1936,CpG_1937,CpG_1938,CpG_1939,CpG_1940,CpG_315,CpG_316,CpG_450,CpG_451,CpG_452,CpG_453,CpG_454,CpG_455,CpG_456,CpG_614,CpG_615,CpG_616,CpG_617,CpG_618,CpG_619	Wnk4	Cldn4,Clmp,Ddx58,Lin7c,Mpp5,Sh3bp1,Wnk4
GO Cellular Component	GO:0005923	bicellular tight junction	251	9.801002e-1	1.000000e+0	1.000000e+0	2.699003e-1	3.705071e+0	1	43	5.714286e-3	2.325581e-2	1	7	136	CpG_315	CpG_1056,CpG_1057,CpG_1058,CpG_1222,CpG_1223,CpG_1224,CpG_1458,CpG_1459,CpG_1460,CpG_1461,CpG_1462,CpG_1463,CpG_1464,CpG_1465,CpG_1466,CpG_1467,CpG_1468,CpG_1930,CpG_1931,CpG_1932,CpG_1933,CpG_1934,CpG_1935,CpG_1936,CpG_1937,CpG_1938,CpG_1939,CpG_1940,CpG_315,CpG_316,CpG_450,CpG_451,CpG_452,CpG_453,CpG_454,CpG_455,CpG_456,CpG_614,CpG_615,CpG_616,CpG_617,CpG_618,CpG_619	Wnk4	Cldn4,Clmp,Ddx58,Lin7c,Mpp5,Sh3bp1,Wnk4
GO Cellular Component	GO:0044454	nuclear chromosome part	253	9.805001e-1	1.000000e+0	1.000000e+0	4.596322e-1	8.702610e+0	4	101	2.285714e-2	3.960396e-2	2	13	618	CpG_21,CpG_22,CpG_907,CpG_914	CpG_1180,CpG_1181,CpG_1182,CpG_1183,CpG_1184,CpG_1289,CpG_1290,CpG_1291,CpG_1292,CpG_1293,CpG_1294,CpG_1295,CpG_1296,CpG_1297,CpG_1298,CpG_1299,CpG_1300,CpG_1301,CpG_1453,CpG_1454,CpG_1455,CpG_1663,CpG_1664,CpG_1665,CpG_1666,CpG_1667,CpG_1668,CpG_1669,CpG_1832,CpG_1833,CpG_1834,CpG_1835,CpG_1836,CpG_1837,CpG_1838,CpG_1869,CpG_1870,CpG_1871,CpG_19,CpG_1979,CpG_1980,CpG_1981,CpG_1982,CpG_1983,CpG_1…	Mbd2,Tnp1	Cbx8,Dclre1a,Ddx11,E2f4,Foxd3,Hist2h2ab,Mbd2,Mef2a,Ncor2,Satb1,Syce1l,Tcf12,Tnp1
GO Cellular Component	GO:0000228	nuclear chromosome	253	9.805001e-1	1.000000e+0	1.000000e+0	4.596322e-1	8.702610e+0	4	101	2.285714e-2	3.960396e-2	2	13	651	CpG_21,CpG_22,CpG_907,CpG_914	CpG_1180,CpG_1181,CpG_1182,CpG_1183,CpG_1184,CpG_1289,CpG_1290,CpG_1291,CpG_1292,CpG_1293,CpG_1294,CpG_1295,CpG_1296,CpG_1297,CpG_1298,CpG_1299,CpG_1300,CpG_1301,CpG_1453,CpG_1454,CpG_1455,CpG_1663,CpG_1664,CpG_1665,CpG_1666,CpG_1667,CpG_1668,CpG_1669,CpG_1832,CpG_1833,CpG_1834,CpG_1835,CpG_1836,CpG_1837,CpG_1838,CpG_1869,CpG_1870,CpG_1871,CpG_19,CpG_1979,CpG_1980,CpG_1981,CpG_1982,CpG_1983,CpG_1…	Mbd2,Tnp1	Cbx8,Dclre1a,Ddx11,E2f4,Foxd3,Hist2h2ab,Mbd2,Mef2a,Ncor2,Satb1,Syce1l,Tcf12,Tnp1
GO Cellular Component	GO:0098793	presynapse	255	9.824996e-1	1.000000e+0	1.000000e+0	4.096134e-1	7.323978e+0	3	85	1.714286e-2	3.529412e-2	3	9	349	CpG_1866,CpG_235,CpG_27	CpG_1056,CpG_1057,CpG_1058,CpG_1469,CpG_1470,CpG_1749,CpG_1750,CpG_1751,CpG_1752,CpG_1753,CpG_1754,CpG_1755,CpG_1756,CpG_1757,CpG_1785,CpG_1786,CpG_1787,CpG_1788,CpG_1789,CpG_1790,CpG_1791,CpG_1792,CpG_1793,CpG_1794,CpG_1795,CpG_1796,CpG_1797,CpG_1798,CpG_1799,CpG_1800,CpG_1801,CpG_1802,CpG_1803,CpG_1804,CpG_1805,CpG_1806,CpG_1807,CpG_1808,CpG_1856,CpG_1857,CpG_1858,CpG_1859,CpG_1860,CpG_1861,CpG…	Calb2,Doc2b,Ptprn	Cadm1,Calb2,Cdh8,Doc2b,Grik1,Lin7c,Ptprn,Rab3a,Stx1a
GO Cellular Component	GO:0070161	anchoring junction	256	9.869242e-1	1.000000e+0	1.000000e+0	3.912039e-1	7.668636e+0	3	89	1.714286e-2	3.370787e-2	2	13	522	CpG_207,CpG_21,CpG_22	CpG_1056,CpG_1057,CpG_1058,CpG_1412,CpG_1413,CpG_1414,CpG_165,CpG_166,CpG_167,CpG_168,CpG_169,CpG_170,CpG_171,CpG_19,CpG_1941,CpG_1942,CpG_1943,CpG_1944,CpG_1945,CpG_1946,CpG_1947,CpG_1948,CpG_1949,CpG_1950,CpG_1951,CpG_1952,CpG_1953,CpG_1954,CpG_1955,CpG_1956,CpG_1957,CpG_1958,CpG_1959,CpG_1960,CpG_1961,CpG_20,CpG_203,CpG_204,CpG_205,CpG_206,CpG_207,CpG_208,CpG_209,CpG_21,CpG_210,CpG_211,CpG_22,…	Arf1,Tns1	Arf1,Cadm1,Fzd2,Lin7c,Npm1,Pcbp2,Ptprc,Rpl38,Rps14,Sh3bp1,Tns1,Tns4,Yes1
GO Cellular Component	GO:0005912	adherens junction	256	9.869242e-1	1.000000e+0	1.000000e+0	3.912039e-1	7.668636e+0	3	89	1.714286e-2	3.370787e-2	2	13	503	CpG_207,CpG_21,CpG_22	CpG_1056,CpG_1057,CpG_1058,CpG_1412,CpG_1413,CpG_1414,CpG_165,CpG_166,CpG_167,CpG_168,CpG_169,CpG_170,CpG_171,CpG_19,CpG_1941,CpG_1942,CpG_1943,CpG_1944,CpG_1945,CpG_1946,CpG_1947,CpG_1948,CpG_1949,CpG_1950,CpG_1951,CpG_1952,CpG_1953,CpG_1954,CpG_1955,CpG_1956,CpG_1957,CpG_1958,CpG_1959,CpG_1960,CpG_1961,CpG_20,CpG_203,CpG_204,CpG_205,CpG_206,CpG_207,CpG_208,CpG_209,CpG_21,CpG_210,CpG_211,CpG_22,…	Arf1,Tns1	Arf1,Cadm1,Fzd2,Lin7c,Npm1,Pcbp2,Ptprc,Rpl38,Rps14,Sh3bp1,Tns1,Tns4,Yes1
GO Cellular Component	GO:0070160	occluding junction	258	9.920985e-1	1.000000e+0	1.000000e+0	2.189757e-1	4.566716e+0	1	53	5.714286e-3	1.886792e-2	1	8	139	CpG_315	CpG_1056,CpG_1057,CpG_1058,CpG_1222,CpG_1223,CpG_1224,CpG_1458,CpG_1459,CpG_1460,CpG_1461,CpG_1462,CpG_1463,CpG_1464,CpG_1465,CpG_1466,CpG_1467,CpG_1468,CpG_1625,CpG_1626,CpG_1627,CpG_1628,CpG_1629,CpG_1630,CpG_1631,CpG_1632,CpG_1633,CpG_1634,CpG_1930,CpG_1931,CpG_1932,CpG_1933,CpG_1934,CpG_1935,CpG_1936,CpG_1937,CpG_1938,CpG_1939,CpG_1940,CpG_315,CpG_316,CpG_450,CpG_451,CpG_452,CpG_453,CpG_454,C…	Wnk4	Cldn4,Clmp,Ddx58,Lin7c,Lsr,Mpp5,Sh3bp1,Wnk4
GO Cellular Component	GO:0030496	midbody	258	9.920985e-1	1.000000e+0	1.000000e+0	2.189757e-1	4.566716e+0	1	53	5.714286e-3	1.886792e-2	1	6	161	CpG_1693	CpG_1688,CpG_1689,CpG_1690,CpG_1691,CpG_1692,CpG_1693,CpG_1773,CpG_1774,CpG_1775,CpG_1776,CpG_1777,CpG_1881,CpG_1882,CpG_1883,CpG_1884,CpG_1885,CpG_1886,CpG_1887,CpG_1888,CpG_1889,CpG_1890,CpG_1891,CpG_1892,CpG_1893,CpG_1894,CpG_1895,CpG_1896,CpG_1897,CpG_1898,CpG_1899,CpG_1900,CpG_1901,CpG_1902,CpG_1903,CpG_1904,CpG_1905,CpG_1906,CpG_1907,CpG_1908,CpG_1909,CpG_1910,CpG_1911,CpG_1912,CpG_1913,CpG…	Uvrag	Cyld,Ddx11,Map10,Mtcl1,Sh3bp1,Uvrag
GO Cellular Component	GO:0005911	cell-cell junction	260	9.922214e-1	1.000000e+0	1.000000e+0	3.626786e-1	8.271787e+0	3	96	1.714286e-2	3.125000e-2	3	12	459	CpG_1866,CpG_315,CpG_766	CpG_1056,CpG_1057,CpG_1058,CpG_115,CpG_116,CpG_117,CpG_118,CpG_119,CpG_1222,CpG_1223,CpG_1224,CpG_1458,CpG_1459,CpG_1460,CpG_1461,CpG_1462,CpG_1463,CpG_1464,CpG_1465,CpG_1466,CpG_1467,CpG_1468,CpG_1625,CpG_1626,CpG_1627,CpG_1628,CpG_1629,CpG_1630,CpG_1631,CpG_1632,CpG_1633,CpG_1634,CpG_1856,CpG_1857,CpG_1858,CpG_1859,CpG_1860,CpG_1861,CpG_1862,CpG_1863,CpG_1864,CpG_1865,CpG_1866,CpG_1867,CpG_1868…	Calb2,Tiam1,Wnk4	Cadm1,Calb2,Cldn4,Clmp,Ddx58,Lin7c,Lsr,Mpp5,Rap1b,Sh3bp1,Tiam1,Wnk4
GO Cellular Component	GO:0098791	Golgi subcompartment	261	9.982158e-1	1.000000e+0	1.000000e+0	1.681988e-1	5.945347e+0	1	69	5.714286e-3	1.449275e-2	1	7	281	CpG_207	CpG_1163,CpG_1164,CpG_1165,CpG_1166,CpG_1167,CpG_1168,CpG_1169,CpG_1170,CpG_1171,CpG_1172,CpG_1173,CpG_1174,CpG_1962,CpG_1963,CpG_1964,CpG_203,CpG_204,CpG_205,CpG_206,CpG_207,CpG_208,CpG_209,CpG_210,CpG_211,CpG_403,CpG_404,CpG_405,CpG_406,CpG_407,CpG_408,CpG_409,CpG_410,CpG_411,CpG_412,CpG_413,CpG_414,CpG_415,CpG_416,CpG_417,CpG_418,CpG_419,CpG_420,CpG_43,CpG_44,CpG_441,CpG_442,CpG_443,CpG_444,Cp…	Arf1	Arf1,Asap2,Clvs2,Lrba,Mgat2,Scamp2,Vrk1
GO Cellular Component	GO:0031984	organelle subcompartment	262	9.989822e-1	1.000000e+0	1.000000e+0	1.547429e-1	6.462334e+0	1	75	5.714286e-3	1.333333e-2	1	8	303	CpG_207	CpG_1163,CpG_1164,CpG_1165,CpG_1166,CpG_1167,CpG_1168,CpG_1169,CpG_1170,CpG_1171,CpG_1172,CpG_1173,CpG_1174,CpG_1587,CpG_1588,CpG_1589,CpG_1590,CpG_1591,CpG_1592,CpG_1962,CpG_1963,CpG_1964,CpG_203,CpG_204,CpG_205,CpG_206,CpG_207,CpG_208,CpG_209,CpG_210,CpG_211,CpG_403,CpG_404,CpG_405,CpG_406,CpG_407,CpG_408,CpG_409,CpG_410,CpG_411,CpG_412,CpG_413,CpG_414,CpG_415,CpG_416,CpG_417,CpG_418,CpG_419,Cp…	Arf1	Arf1,Asap2,Clvs2,Lrba,Mgat2,Rtn2,Scamp2,Vrk1
GO Molecular Function	GO:0101006	protein histidine phosphatase activity	1	1.011939e-7	4.132759e-4	4.132759e-4	9.284571e+0	8.616445e-1	8	10	4.571429e-2	8.000000e-1	1	1	2	CpG_990,CpG_991,CpG_994,CpG_995,CpG_996,CpG_997,CpG_998,CpG_999	CpG_990,CpG_991,CpG_992,CpG_993,CpG_994,CpG_995,CpG_996,CpG_997,CpG_998,CpG_999	Phpt1	Phpt1
GO Molecular Function	GO:0016248	channel inhibitor activity	2	2.949516e-7	1.204582e-3	6.022912e-4	7.460816e+0	1.206302e+0	9	14	5.142857e-2	6.428571e-1	2	3	35	CpG_315,CpG_990,CpG_991,CpG_994,CpG_995,CpG_996,CpG_997,CpG_998,CpG_999	CpG_1469,CpG_1470,CpG_315,CpG_316,CpG_990,CpG_991,CpG_992,CpG_993,CpG_994,CpG_995,CpG_996,CpG_997,CpG_998,CpG_999	Phpt1,Wnk4	Phpt1,Stx1a,Wnk4
GO Molecular Function	GO:0008200	ion channel inhibitor activity	2	2.949516e-7	1.204582e-3	6.022912e-4	7.460816e+0	1.206302e+0	9	14	5.142857e-2	6.428571e-1	2	3	34	CpG_315,CpG_990,CpG_991,CpG_994,CpG_995,CpG_996,CpG_997,CpG_998,CpG_999	CpG_1469,CpG_1470,CpG_315,CpG_316,CpG_990,CpG_991,CpG_992,CpG_993,CpG_994,CpG_995,CpG_996,CpG_997,CpG_998,CpG_999	Phpt1,Wnk4	Phpt1,Stx1a,Wnk4
GO Molecular Function	GO:0019855	calcium channel inhibitor activity	4	9.559792e-7	3.904219e-3	9.760548e-4	7.737143e+0	1.033973e+0	8	12	4.571429e-2	6.666667e-1	1	2	11	CpG_990,CpG_991,CpG_994,CpG_995,CpG_996,CpG_997,CpG_998,CpG_999	CpG_1469,CpG_1470,CpG_990,CpG_991,CpG_992,CpG_993,CpG_994,CpG_995,CpG_996,CpG_997,CpG_998,CpG_999	Phpt1	Phpt1,Stx1a
GO Molecular Function	GO:0005246	calcium channel regulator activity	4	9.559792e-7	3.904219e-3	9.760548e-4	7.737143e+0	1.033973e+0	8	12	4.571429e-2	6.666667e-1	1	2	32	CpG_990,CpG_991,CpG_994,CpG_995,CpG_996,CpG_997,CpG_998,CpG_999	CpG_1469,CpG_1470,CpG_990,CpG_991,CpG_992,CpG_993,CpG_994,CpG_995,CpG_996,CpG_997,CpG_998,CpG_999	Phpt1	Phpt1,Stx1a
GO Molecular Function	GO:0005085	guanyl-nucleotide exchange factor activity	6	2.821960e-6	1.152488e-2	1.920814e-3	3.784472e+0	3.963565e+0	15	46	8.571429e-2	3.260870e-1	3	8	208	CpG_1471,CpG_1473,CpG_1475,CpG_1477,CpG_1478,CpG_296,CpG_297,CpG_298,CpG_299,CpG_300,CpG_301,CpG_302,CpG_303,CpG_304,CpG_766	CpG_1239,CpG_1240,CpG_1241,CpG_1242,CpG_1243,CpG_1471,CpG_1472,CpG_1473,CpG_1474,CpG_1475,CpG_1476,CpG_1477,CpG_1478,CpG_1544,CpG_1545,CpG_1546,CpG_1547,CpG_1548,CpG_190,CpG_296,CpG_297,CpG_298,CpG_299,CpG_300,CpG_301,CpG_302,CpG_303,CpG_304,CpG_522,CpG_523,CpG_524,CpG_525,CpG_526,CpG_527,CpG_528,CpG_582,CpG_583,CpG_584,CpG_585,CpG_586,CpG_587,CpG_588,CpG_763,CpG_764,CpG_765,CpG_766	Gm6408,Rapgefl1,Tiam1	Arhgef3,Dis3,Fgd5,Gm6408,Rapgefl1,Rasgef1c,Sec61b,Tiam1
GO Molecular Function	GO:0043027	cysteine-type endopeptidase inhibitor activity involved in apoptotic process	7	3.211793e-5	1.311696e-1	1.873852e-2	5.461513e+0	1.464796e+0	8	17	4.571429e-2	4.705882e-1	1	1	29	CpG_1815,CpG_1816,CpG_1818,CpG_1820,CpG_1822,CpG_1824,CpG_1826,CpG_1828	CpG_1815,CpG_1816,CpG_1817,CpG_1818,CpG_1819,CpG_1820,CpG_1821,CpG_1822,CpG_1823,CpG_1824,CpG_1825,CpG_1826,CpG_1827,CpG_1828,CpG_1829,CpG_1830,CpG_1831	Nol3	Nol3
GO Molecular Function	GO:0061135	endopeptidase regulator activity	7	3.211793e-5	1.311696e-1	1.873852e-2	5.461513e+0	1.464796e+0	8	17	4.571429e-2	4.705882e-1	1	1	216	CpG_1815,CpG_1816,CpG_1818,CpG_1820,CpG_1822,CpG_1824,CpG_1826,CpG_1828	CpG_1815,CpG_1816,CpG_1817,CpG_1818,CpG_1819,CpG_1820,CpG_1821,CpG_1822,CpG_1823,CpG_1824,CpG_1825,CpG_1826,CpG_1827,CpG_1828,CpG_1829,CpG_1830,CpG_1831	Nol3	Nol3
GO Molecular Function	GO:0089720	caspase binding	7	3.211793e-5	1.311696e-1	1.873852e-2	5.461513e+0	1.464796e+0	8	17	4.571429e-2	4.705882e-1	1	1	6	CpG_1815,CpG_1816,CpG_1818,CpG_1820,CpG_1822,CpG_1824,CpG_1826,CpG_1828	CpG_1815,CpG_1816,CpG_1817,CpG_1818,CpG_1819,CpG_1820,CpG_1821,CpG_1822,CpG_1823,CpG_1824,CpG_1825,CpG_1826,CpG_1827,CpG_1828,CpG_1829,CpG_1830,CpG_1831	Nol3	Nol3
GO Molecular Function	GO:0035877	death effector domain binding	7	3.211793e-5	1.311696e-1	1.873852e-2	5.461513e+0	1.464796e+0	8	17	4.571429e-2	4.705882e-1	1	1	3	CpG_1815,CpG_1816,CpG_1818,CpG_1820,CpG_1822,CpG_1824,CpG_1826,CpG_1828	CpG_1815,CpG_1816,CpG_1817,CpG_1818,CpG_1819,CpG_1820,CpG_1821,CpG_1822,CpG_1823,CpG_1824,CpG_1825,CpG_1826,CpG_1827,CpG_1828,CpG_1829,CpG_1830,CpG_1831	Nol3	Nol3
GO Molecular Function	GO:0004866	endopeptidase inhibitor activity	7	3.211793e-5	1.311696e-1	1.873852e-2	5.461513e+0	1.464796e+0	8	17	4.571429e-2	4.705882e-1	1	1	207	CpG_1815,CpG_1816,CpG_1818,CpG_1820,CpG_1822,CpG_1824,CpG_1826,CpG_1828	CpG_1815,CpG_1816,CpG_1817,CpG_1818,CpG_1819,CpG_1820,CpG_1821,CpG_1822,CpG_1823,CpG_1824,CpG_1825,CpG_1826,CpG_1827,CpG_1828,CpG_1829,CpG_1830,CpG_1831	Nol3	Nol3
GO Molecular Function	GO:0004869	cysteine-type endopeptidase inhibitor activity	7	3.211793e-5	1.311696e-1	1.873852e-2	5.461513e+0	1.464796e+0	8	17	4.571429e-2	4.705882e-1	1	1	72	CpG_1815,CpG_1816,CpG_1818,CpG_1820,CpG_1822,CpG_1824,CpG_1826,CpG_1828	CpG_1815,CpG_1816,CpG_1817,CpG_1818,CpG_1819,CpG_1820,CpG_1821,CpG_1822,CpG_1823,CpG_1824,CpG_1825,CpG_1826,CpG_1827,CpG_1828,CpG_1829,CpG_1830,CpG_1831	Nol3	Nol3
GO Molecular Function	GO:0005123	death receptor binding	7	3.211793e-5	1.311696e-1	1.873852e-2	5.461513e+0	1.464796e+0	8	17	4.571429e-2	4.705882e-1	1	1	13	CpG_1815,CpG_1816,CpG_1818,CpG_1820,CpG_1822,CpG_1824,CpG_1826,CpG_1828	CpG_1815,CpG_1816,CpG_1817,CpG_1818,CpG_1819,CpG_1820,CpG_1821,CpG_1822,CpG_1823,CpG_1824,CpG_1825,CpG_1826,CpG_1827,CpG_1828,CpG_1829,CpG_1830,CpG_1831	Nol3	Nol3
GO Molecular Function	GO:0032813	tumor necrosis factor receptor superfamily binding	7	3.211793e-5	1.311696e-1	1.873852e-2	5.461513e+0	1.464796e+0	8	17	4.571429e-2	4.705882e-1	1	1	41	CpG_1815,CpG_1816,CpG_1818,CpG_1820,CpG_1822,CpG_1824,CpG_1826,CpG_1828	CpG_1815,CpG_1816,CpG_1817,CpG_1818,CpG_1819,CpG_1820,CpG_1821,CpG_1822,CpG_1823,CpG_1824,CpG_1825,CpG_1826,CpG_1827,CpG_1828,CpG_1829,CpG_1830,CpG_1831	Nol3	Nol3
GO Molecular Function	GO:0002020	protease binding	15	8.968778e-5	3.662849e-1	2.441899e-2	4.352143e+0	2.067947e+0	9	24	5.142857e-2	3.750000e-1	2	3	137	CpG_1456,CpG_1815,CpG_1816,CpG_1818,CpG_1820,CpG_1822,CpG_1824,CpG_1826,CpG_1828	CpG_1456,CpG_1457,CpG_1815,CpG_1816,CpG_1817,CpG_1818,CpG_1819,CpG_1820,CpG_1821,CpG_1822,CpG_1823,CpG_1824,CpG_1825,CpG_1826,CpG_1827,CpG_1828,CpG_1829,CpG_1830,CpG_1831,CpG_902,CpG_903,CpG_904,CpG_905,CpG_906	Nol3,Ubc	Ccbe1,Nol3,Ubc
GO Molecular Function	GO:0019902	phosphatase binding	16	1.218089e-4	4.974675e-1	3.109172e-2	3.143214e+0	4.135894e+0	13	48	7.428571e-2	2.708333e-1	4	6	166	CpG_147,CpG_148,CpG_149,CpG_1815,CpG_1816,CpG_1818,CpG_1820,CpG_1822,CpG_1824,CpG_1826,CpG_1828,CpG_662,CpG_766	CpG_1217,CpG_1218,CpG_1219,CpG_147,CpG_148,CpG_149,CpG_1815,CpG_1816,CpG_1817,CpG_1818,CpG_1819,CpG_1820,CpG_1821,CpG_1822,CpG_1823,CpG_1824,CpG_1825,CpG_1826,CpG_1827,CpG_1828,CpG_1829,CpG_1830,CpG_1831,CpG_567,CpG_568,CpG_645,CpG_646,CpG_647,CpG_648,CpG_649,CpG_650,CpG_651,CpG_652,CpG_653,CpG_654,CpG_655,CpG_656,CpG_657,CpG_658,CpG_659,CpG_660,CpG_661,CpG_662,CpG_663,CpG_763,CpG_764,CpG_765,CpG…	Hsf4,Ppara,Sfi1,Sod1	Cttnbp2nl,Hsf4,Ppara,Ppp2r2a,Sfi1,Sod1
GO Molecular Function	GO:0005126	cytokine receptor binding	17	1.277741e-4	5.218294e-1	3.069585e-2	3.315918e+0	3.618907e+0	12	42	6.857143e-2	2.857143e-1	3	7	283	CpG_1284,CpG_1815,CpG_1816,CpG_1818,CpG_1820,CpG_1822,CpG_1824,CpG_1826,CpG_1828,CpG_40,CpG_41,CpG_42	CpG_1056,CpG_1057,CpG_1058,CpG_1220,CpG_1284,CpG_1285,CpG_1286,CpG_1287,CpG_1288,CpG_1564,CpG_1565,CpG_1566,CpG_1567,CpG_1568,CpG_1569,CpG_1815,CpG_1816,CpG_1817,CpG_1818,CpG_1819,CpG_1820,CpG_1821,CpG_1822,CpG_1823,CpG_1824,CpG_1825,CpG_1826,CpG_1827,CpG_1828,CpG_1829,CpG_1830,CpG_1831,CpG_40,CpG_41,CpG_42,CpG_582,CpG_583,CpG_584,CpG_585,CpG_586,CpG_587,CpG_588	Ifna13,Nol3,Tgfb2	Bdnf,Csf1,Gdf3,Ifna13,Nol3,Pibf1,Tgfb2
GO Molecular Function	GO:0003779	actin binding	18	1.640727e-4	6.700729e-1	3.722627e-2	3.238804e+0	3.705071e+0	12	43	6.857143e-2	2.790698e-1	4	7	400	CpG_1471,CpG_1473,CpG_1475,CpG_1477,CpG_1478,CpG_21,CpG_22,CpG_222,CpG_890,CpG_891,CpG_892,CpG_894	CpG_1471,CpG_1472,CpG_1473,CpG_1474,CpG_1475,CpG_1476,CpG_1477,CpG_1478,CpG_1773,CpG_1774,CpG_1775,CpG_1776,CpG_1777,CpG_19,CpG_20,CpG_21,CpG_218,CpG_219,CpG_22,CpG_220,CpG_221,CpG_222,CpG_223,CpG_23,CpG_24,CpG_25,CpG_26,CpG_305,CpG_306,CpG_307,CpG_693,CpG_694,CpG_695,CpG_696,CpG_697,CpG_698,CpG_699,CpG_700,CpG_890,CpG_891,CpG_892,CpG_893,CpG_894	Bin1,Gas7,Tns1,Wasf3	Bin1,Gas7,Mkl2,Nod2,Tns1,Tns4,Wasf3
GO Molecular Function	GO:0019903	protein phosphatase binding	19	1.840285e-4	7.515724e-1	3.955644e-2	4.017363e+0	2.240276e+0	9	26	5.142857e-2	3.461538e-1	2	4	122	CpG_1815,CpG_1816,CpG_1818,CpG_1820,CpG_1822,CpG_1824,CpG_1826,CpG_1828,CpG_766	CpG_1217,CpG_1218,CpG_1219,CpG_1815,CpG_1816,CpG_1817,CpG_1818,CpG_1819,CpG_1820,CpG_1821,CpG_1822,CpG_1823,CpG_1824,CpG_1825,CpG_1826,CpG_1827,CpG_1828,CpG_1829,CpG_1830,CpG_1831,CpG_567,CpG_568,CpG_763,CpG_764,CpG_765,CpG_766	Hsf4,Sod1	Cttnbp2nl,Hsf4,Ppp2r2a,Sod1
GO Molecular Function	GO:0016406	carnitine O-acyltransferase activity	20	2.490175e-4	1.000000e+0	5.084937e-2	9.284571e+0	4.308223e-1	4	5	2.285714e-2	8.000000e-1	1	1	6	CpG_1640,CpG_1641,CpG_1642,CpG_1644	CpG_1640,CpG_1641,CpG_1642,CpG_1643,CpG_1644	Cpt1c	Cpt1c
GO Molecular Function	GO:0016409	palmitoyltransferase activity	20	2.490175e-4	1.000000e+0	5.084937e-2	9.284571e+0	4.308223e-1	4	5	2.285714e-2	8.000000e-1	1	1	37	CpG_1640,CpG_1641,CpG_1642,CpG_1644	CpG_1640,CpG_1641,CpG_1642,CpG_1643,CpG_1644	Cpt1c	Cpt1c
GO Molecular Function	GO:0004095	carnitine O-palmitoyltransferase activity	20	2.490175e-4	1.000000e+0	5.084937e-2	9.284571e+0	4.308223e-1	4	5	2.285714e-2	8.000000e-1	1	1	4	CpG_1640,CpG_1641,CpG_1642,CpG_1644	CpG_1640,CpG_1641,CpG_1642,CpG_1643,CpG_1644	Cpt1c	Cpt1c
GO Molecular Function	GO:0004721	phosphoprotein phosphatase activity	23	2.893991e-4	1.000000e+0	5.138721e-2	4.220260e+0	1.895618e+0	8	22	4.571429e-2	3.636364e-1	1	4	164	CpG_990,CpG_991,CpG_994,CpG_995,CpG_996,CpG_997,CpG_998,CpG_999	CpG_31,CpG_32,CpG_33,CpG_34,CpG_567,CpG_568,CpG_614,CpG_615,CpG_616,CpG_617,CpG_618,CpG_619,CpG_990,CpG_991,CpG_992,CpG_993,CpG_994,CpG_995,CpG_996,CpG_997,CpG_998,CpG_999	Phpt1	Phpt1,Ppp2r2a,Ptprc,Sh3bp1
GO Molecular Function	GO:0061134	peptidase regulator activity	24	3.493542e-4	1.000000e+0	5.944844e-2	3.730408e+0	2.412605e+0	9	28	5.142857e-2	3.214286e-1	2	3	252	CpG_1815,CpG_1816,CpG_1818,CpG_1820,CpG_1822,CpG_1824,CpG_1826,CpG_1828,CpG_640	CpG_1815,CpG_1816,CpG_1817,CpG_1818,CpG_1819,CpG_1820,CpG_1821,CpG_1822,CpG_1823,CpG_1824,CpG_1825,CpG_1826,CpG_1827,CpG_1828,CpG_1829,CpG_1830,CpG_1831,CpG_640,CpG_641,CpG_642,CpG_810,CpG_811,CpG_812,CpG_813,CpG_814,CpG_815,CpG_816,CpG_817	Fbln1,Nol3	Fbln1,Nol3,Pi16
GO Molecular Function	GO:0047372	acylglycerol lipase activity	25	6.297170e-4	1.000000e+0	1.028706e-1	1.160571e+1	2.584934e-1	3	3	1.714286e-2	1.000000e+0	1	1	7	CpG_1307,CpG_1308,CpG_1309	CpG_1307,CpG_1308,CpG_1309	Faah	Faah
GO Molecular Function	GO:0048487	beta-tubulin binding	25	6.297170e-4	1.000000e+0	1.028706e-1	1.160571e+1	2.584934e-1	3	3	1.714286e-2	1.000000e+0	1	1	37	CpG_257,CpG_258,CpG_259	CpG_257,CpG_258,CpG_259	Bcas3	Bcas3
GO Molecular Function	GO:0034714	type III transforming growth factor beta receptor binding	25	6.297170e-4	1.000000e+0	1.028706e-1	1.160571e+1	2.584934e-1	3	3	1.714286e-2	1.000000e+0	1	1	4	CpG_40,CpG_41,CpG_42	CpG_40,CpG_41,CpG_42	Tgfb2	Tgfb2
GO Molecular Function	GO:0103073	anandamide amidohydrolase activity	25	6.297170e-4	1.000000e+0	1.028706e-1	1.160571e+1	2.584934e-1	3	3	1.714286e-2	1.000000e+0	1	1	1	CpG_1307,CpG_1308,CpG_1309	CpG_1307,CpG_1308,CpG_1309	Faah	Faah
GO Molecular Function	GO:0098599	palmitoyl hydrolase activity	25	6.297170e-4	1.000000e+0	1.028706e-1	1.160571e+1	2.584934e-1	3	3	1.714286e-2	1.000000e+0	1	1	13	CpG_40,CpG_41,CpG_42	CpG_40,CpG_41,CpG_42	Lyplal1	Lyplal1
GO Molecular Function	GO:0102077	oleamide hydrolase activity	25	6.297170e-4	1.000000e+0	1.028706e-1	1.160571e+1	2.584934e-1	3	3	1.714286e-2	1.000000e+0	1	1	1	CpG_1307,CpG_1308,CpG_1309	CpG_1307,CpG_1308,CpG_1309	Faah	Faah
GO Molecular Function	GO:0005114	type II transforming growth factor beta receptor binding	25	6.297170e-4	1.000000e+0	1.028706e-1	1.160571e+1	2.584934e-1	3	3	1.714286e-2	1.000000e+0	1	1	7	CpG_40,CpG_41,CpG_42	CpG_40,CpG_41,CpG_42	Tgfb2	Tgfb2
GO Molecular Function	GO:0017064	fatty acid amide hydrolase activity	25	6.297170e-4	1.000000e+0	1.028706e-1	1.160571e+1	2.584934e-1	3	3	1.714286e-2	1.000000e+0	1	1	1	CpG_1307,CpG_1308,CpG_1309	CpG_1307,CpG_1308,CpG_1309	Faah	Faah
GO Molecular Function	GO:0008474	palmitoyl-(protein) hydrolase activity	25	6.297170e-4	1.000000e+0	1.028706e-1	1.160571e+1	2.584934e-1	3	3	1.714286e-2	1.000000e+0	1	1	10	CpG_40,CpG_41,CpG_42	CpG_40,CpG_41,CpG_42	Lyplal1	Lyplal1
GO Molecular Function	GO:0004040	amidase activity	25	6.297170e-4	1.000000e+0	1.028706e-1	1.160571e+1	2.584934e-1	3	3	1.714286e-2	1.000000e+0	1	1	3	CpG_1307,CpG_1308,CpG_1309	CpG_1307,CpG_1308,CpG_1309	Faah	Faah
GO Molecular Function	GO:0010698	acetyltransferase activator activity	25	6.297170e-4	1.000000e+0	1.028706e-1	1.160571e+1	2.584934e-1	3	3	1.714286e-2	1.000000e+0	1	1	2	CpG_257,CpG_258,CpG_259	CpG_257,CpG_258,CpG_259	Bcas3	Bcas3
GO Molecular Function	GO:0016790	thiolester hydrolase activity	25	6.297170e-4	1.000000e+0	1.028706e-1	1.160571e+1	2.584934e-1	3	3	1.714286e-2	1.000000e+0	1	1	41	CpG_40,CpG_41,CpG_42	CpG_40,CpG_41,CpG_42	Lyplal1	Lyplal1
GO Molecular Function	GO:0003682	chromatin binding	37	6.873982e-4	1.000000e+0	7.587390e-2	1.819274e+0	1.594042e+1	29	185	1.657143e-1	1.567568e-1	7	26	560	CpG_1482,CpG_1483,CpG_1484,CpG_1485,CpG_1486,CpG_1487,CpG_1488,CpG_1492,CpG_1493,CpG_1495,CpG_1496,CpG_1497,CpG_1539,CpG_1540,CpG_257,CpG_258,CpG_259,CpG_282,CpG_283,CpG_287,CpG_289,CpG_84,CpG_861,CpG_862,CpG_863,CpG_864,CpG_865,CpG_907,CpG_914	CpG_1029,CpG_1030,CpG_1031,CpG_1032,CpG_1033,CpG_1034,CpG_1035,CpG_1036,CpG_1037,CpG_1038,CpG_1039,CpG_1040,CpG_1041,CpG_1042,CpG_1043,CpG_1044,CpG_1045,CpG_1046,CpG_1047,CpG_1048,CpG_1049,CpG_1050,CpG_1051,CpG_1052,CpG_1053,CpG_1054,CpG_1055,CpG_136,CpG_137,CpG_138,CpG_139,CpG_140,CpG_1407,CpG_1408,CpG_1409,CpG_141,CpG_1410,CpG_1411,CpG_1415,CpG_1416,CpG_1417,CpG_1418,CpG_1419,CpG_142,CpG_1420,C…	Bcas3,Epop,Gata2,Hdgfl2,Klf14,Mbd2,Mum1	Bcas3,Cbx4,Ddx11,E2f4,Epop,Fosl2,Gata2,Gata6,Gli1,Gm16494,Hdgfl2,Hoxd10,Hoxd13,Klf14,Mbd2,Mef2a,Mum1,Ncor2,Nkx6-1,Nr5a2,Phf21b,Pparg,Prdm11,Satb1,Tshz3,Vrk1
GO Molecular Function	GO:0030414	peptidase inhibitor activity	38	7.806228e-4	1.000000e+0	8.389641e-2	3.713829e+0	2.154111e+0	8	25	4.571429e-2	3.200000e-1	1	2	219	CpG_1815,CpG_1816,CpG_1818,CpG_1820,CpG_1822,CpG_1824,CpG_1826,CpG_1828	CpG_1815,CpG_1816,CpG_1817,CpG_1818,CpG_1819,CpG_1820,CpG_1821,CpG_1822,CpG_1823,CpG_1824,CpG_1825,CpG_1826,CpG_1827,CpG_1828,CpG_1829,CpG_1830,CpG_1831,CpG_810,CpG_811,CpG_812,CpG_813,CpG_814,CpG_815,CpG_816,CpG_817	Nol3	Nol3,Pi16
GO Molecular Function	GO:0051015	actin filament binding	39	1.350117e-3	1.000000e+0	1.413815e-1	5.275325e+0	9.478090e-1	5	11	2.857143e-2	4.545455e-1	2	2	164	CpG_222,CpG_890,CpG_891,CpG_892,CpG_894	CpG_218,CpG_219,CpG_220,CpG_221,CpG_222,CpG_223,CpG_890,CpG_891,CpG_892,CpG_893,CpG_894	Bin1,Gas7	Bin1,Gas7
GO Molecular Function	GO:0052689	carboxylic ester hydrolase activity	40	1.378395e-3	1.000000e+0	1.407341e-1	3.438730e+0	2.326440e+0	8	27	4.571429e-2	2.962963e-1	4	5	147	CpG_1307,CpG_1308,CpG_1309,CpG_1433,CpG_1480,CpG_40,CpG_41,CpG_42	CpG_1307,CpG_1308,CpG_1309,CpG_1431,CpG_1432,CpG_1433,CpG_1434,CpG_1435,CpG_1436,CpG_1437,CpG_1438,CpG_1439,CpG_1479,CpG_1480,CpG_1481,CpG_1758,CpG_1759,CpG_1760,CpG_1761,CpG_1762,CpG_1763,CpG_1764,CpG_1765,CpG_1766,CpG_40,CpG_41,CpG_42	Faah,Lyplal1,Pla2g1b,Pon2	Faah,Lyplal1,Pgls,Pla2g1b,Pon2
GO Molecular Function	GO:0044325	ion channel binding	40	1.378395e-3	1.000000e+0	1.407341e-1	3.438730e+0	2.326440e+0	8	27	4.571429e-2	2.962963e-1	1	6	113	CpG_990,CpG_991,CpG_994,CpG_995,CpG_996,CpG_997,CpG_998,CpG_999	CpG_1412,CpG_1413,CpG_1414,CpG_1469,CpG_1470,CpG_293,CpG_294,CpG_295,CpG_767,CpG_768,CpG_769,CpG_770,CpG_771,CpG_966,CpG_967,CpG_968,CpG_969,CpG_990,CpG_991,CpG_992,CpG_993,CpG_994,CpG_995,CpG_996,CpG_997,CpG_998,CpG_999	Phpt1	Kcne1,Kcnip2,Phpt1,Stx1a,Tcap,Yes1
GO Molecular Function	GO:0050501	hyaluronan synthase activity	42	1.516645e-3	1.000000e+0	1.474757e-1	6.631837e+0	6.031512e-1	4	7	2.285714e-2	5.714286e-1	1	1	4	CpG_1840,CpG_1841,CpG_1842,CpG_1843	CpG_1839,CpG_1840,CpG_1841,CpG_1842,CpG_1843,CpG_1844,CpG_1845	Has3	Has3
GO Molecular Function	GO:0016309	1-phosphatidylinositol-5-phosphate 4-kinase activity	42	1.516645e-3	1.000000e+0	1.474757e-1	6.631837e+0	6.031512e-1	4	7	2.285714e-2	5.714286e-1	1	1	3	CpG_983,CpG_985,CpG_986,CpG_987	CpG_983,CpG_984,CpG_985,CpG_986,CpG_987,CpG_988,CpG_989	Pip4k2a	Pip4k2a
GO Molecular Function	GO:0016307	phosphatidylinositol phosphate kinase activity	42	1.516645e-3	1.000000e+0	1.474757e-1	6.631837e+0	6.031512e-1	4	7	2.285714e-2	5.714286e-1	1	1	15	CpG_983,CpG_985,CpG_986,CpG_987	CpG_983,CpG_984,CpG_985,CpG_986,CpG_987,CpG_988,CpG_989	Pip4k2a	Pip4k2a
GO Molecular Function	GO:0001190	transcriptional activator activity, RNA polymerase II transcription factor binding	45	2.075010e-3	1.000000e+0	1.883187e-1	2.394830e+0	5.428360e+0	13	63	7.428571e-2	2.063492e-1	2	6	64	CpG_1482,CpG_1483,CpG_1484,CpG_1485,CpG_1486,CpG_1487,CpG_1488,CpG_1492,CpG_1493,CpG_1495,CpG_1496,CpG_1497,CpG_662	CpG_1482,CpG_1483,CpG_1484,CpG_1485,CpG_1486,CpG_1487,CpG_1488,CpG_1489,CpG_1490,CpG_1491,CpG_1492,CpG_1493,CpG_1494,CpG_1495,CpG_1496,CpG_1497,CpG_1498,CpG_1499,CpG_1500,CpG_1501,CpG_165,CpG_166,CpG_1663,CpG_1664,CpG_1665,CpG_1666,CpG_1667,CpG_1668,CpG_1669,CpG_167,CpG_168,CpG_169,CpG_170,CpG_171,CpG_457,CpG_458,CpG_645,CpG_646,CpG_647,CpG_648,CpG_649,CpG_650,CpG_651,CpG_652,CpG_653,CpG_654,CpG_…	Klf14,Ppara	Klf14,Med6,Mef2a,Mkl2,Npm1,Ppara
GO Molecular Function	GO:0008374	O-acyltransferase activity	46	2.830212e-3	1.000000e+0	2.512736e-1	5.802857e+0	6.893156e-1	4	8	2.285714e-2	5.000000e-1	1	2	42	CpG_1640,CpG_1641,CpG_1642,CpG_1644	CpG_1640,CpG_1641,CpG_1642,CpG_1643,CpG_1644,CpG_2029,CpG_2030,CpG_2031	Cpt1c	Abhd5,Cpt1c
GO Molecular Function	GO:0016747	transferase activity, transferring acyl groups other than amino-acyl groups	46	2.830212e-3	1.000000e+0	2.512736e-1	5.802857e+0	6.893156e-1	4	8	2.285714e-2	5.000000e-1	1	2	223	CpG_1640,CpG_1641,CpG_1642,CpG_1644	CpG_1640,CpG_1641,CpG_1642,CpG_1643,CpG_1644,CpG_2029,CpG_2030,CpG_2031	Cpt1c	Abhd5,Cpt1c
GO Molecular Function	GO:0001191	transcriptional repressor activity, RNA polymerase II transcription factor binding	48	4.230082e-3	1.000000e+0	3.599095e-1	2.218739e+0	5.859183e+0	13	68	7.428571e-2	1.911765e-1	2	7	102	CpG_1482,CpG_1483,CpG_1484,CpG_1485,CpG_1486,CpG_1487,CpG_1488,CpG_1492,CpG_1493,CpG_1495,CpG_1496,CpG_1497,CpG_662	CpG_1482,CpG_1483,CpG_1484,CpG_1485,CpG_1486,CpG_1487,CpG_1488,CpG_1489,CpG_1490,CpG_1491,CpG_1492,CpG_1493,CpG_1494,CpG_1495,CpG_1496,CpG_1497,CpG_1498,CpG_1499,CpG_1500,CpG_1501,CpG_165,CpG_166,CpG_1663,CpG_1664,CpG_1665,CpG_1666,CpG_1667,CpG_1668,CpG_1669,CpG_167,CpG_168,CpG_169,CpG_170,CpG_171,CpG_457,CpG_458,CpG_459,CpG_460,CpG_461,CpG_462,CpG_463,CpG_645,CpG_646,CpG_647,CpG_648,CpG_649,CpG_…	Klf14,Ppara	Esrrb,Klf14,Med6,Mef2a,Mkl2,Npm1,Ppara
GO Molecular Function	GO:0001076	transcription factor activity, RNA polymerase II transcription factor binding	48	4.230082e-3	1.000000e+0	3.599095e-1	2.218739e+0	5.859183e+0	13	68	7.428571e-2	1.911765e-1	2	7	160	CpG_1482,CpG_1483,CpG_1484,CpG_1485,CpG_1486,CpG_1487,CpG_1488,CpG_1492,CpG_1493,CpG_1495,CpG_1496,CpG_1497,CpG_662	CpG_1482,CpG_1483,CpG_1484,CpG_1485,CpG_1486,CpG_1487,CpG_1488,CpG_1489,CpG_1490,CpG_1491,CpG_1492,CpG_1493,CpG_1494,CpG_1495,CpG_1496,CpG_1497,CpG_1498,CpG_1499,CpG_1500,CpG_1501,CpG_165,CpG_166,CpG_1663,CpG_1664,CpG_1665,CpG_1666,CpG_1667,CpG_1668,CpG_1669,CpG_167,CpG_168,CpG_169,CpG_170,CpG_171,CpG_457,CpG_458,CpG_459,CpG_460,CpG_461,CpG_462,CpG_463,CpG_645,CpG_646,CpG_647,CpG_648,CpG_649,CpG_…	Klf14,Ppara	Esrrb,Klf14,Med6,Mef2a,Mkl2,Npm1,Ppara
GO Molecular Function	GO:0016791	phosphatase activity	50	4.487723e-3	1.000000e+0	3.665572e-1	2.901429e+0	2.757262e+0	8	32	4.571429e-2	2.500000e-1	1	6	253	CpG_990,CpG_991,CpG_994,CpG_995,CpG_996,CpG_997,CpG_998,CpG_999	CpG_1314,CpG_1315,CpG_1316,CpG_1317,CpG_1318,CpG_1319,CpG_1320,CpG_1321,CpG_1516,CpG_1517,CpG_31,CpG_32,CpG_33,CpG_34,CpG_567,CpG_568,CpG_614,CpG_615,CpG_616,CpG_617,CpG_618,CpG_619,CpG_990,CpG_991,CpG_992,CpG_993,CpG_994,CpG_995,CpG_996,CpG_997,CpG_998,CpG_999	Phpt1	Nt5c1a,Nt5c3,Phpt1,Ppp2r2a,Ptprc,Sh3bp1
GO Molecular Function	GO:0016247	channel regulator activity	51	4.656755e-3	1.000000e+0	3.729056e-1	2.678242e+0	3.360414e+0	9	39	5.142857e-2	2.307692e-1	2	6	124	CpG_315,CpG_990,CpG_991,CpG_994,CpG_995,CpG_996,CpG_997,CpG_998,CpG_999	CpG_1083,CpG_1084,CpG_1085,CpG_1086,CpG_1087,CpG_1088,CpG_1089,CpG_1090,CpG_1091,CpG_1092,CpG_1093,CpG_1094,CpG_1095,CpG_1096,CpG_1097,CpG_1098,CpG_1469,CpG_1470,CpG_315,CpG_316,CpG_767,CpG_768,CpG_769,CpG_770,CpG_771,CpG_966,CpG_967,CpG_968,CpG_969,CpG_990,CpG_991,CpG_992,CpG_993,CpG_994,CpG_995,CpG_996,CpG_997,CpG_998,CpG_999	Phpt1,Wnk4	Kcne1,Kcnip2,Kcns1,Phpt1,Stx1a,Wnk4
[truncated: 1,782 more rows]
