# Supplementary material for: Hippocampal and cortical tissue-specific epigenetic clocks indicate an increased epigenetic age in a mouse model for Alzheimer’s disease
Source: Aging (Albany NY). 2020 Oct 20;12(20):20817–34. doi: 10.18632/aging.104056 (PMC7655172; doi:10.18632/aging.104056)
Supplement: Supplementary Table 4 [file aging-12-104056-s005..xlsx]

## Sheet: Fig_2_Epigenetic_Age
Linear mixed model fit by REML. t-tests use Satterthwaite's method ['lmerModLmerTest']
Formula: Dnage_months ~ Age * Brain_region * Strain + (1 | id)
Data: Epigenetic age
REML criterion at convergence: 290.4
Scaled residuals:
Min 1Q Median 3Q Max
-1.86083 -0.53369 -0.05227 0.60075 1.99740
Random effects:
Groups Name Variance Std.Dev.
id (Intercept) 0.2331 0.4829
Residual 1.4687 1.2119
Number of obs: 94, groups: id, 48
Fixed effects:
Estimate Std. Error df t value Pr(>|t|)
(Intercept) 17.2000 0.5326 76.6401 32.295 < 2e-16 ***
Age15 -2.7667 0.7532 76.6401 -3.673 0.000441 ***
Age3 -4.7500 0.7532 76.6401 -6.307 1.68e-08 ***
Age6 -3.1167 0.7532 76.6401 -4.138 8.91e-05 ***
Brain_regionHippocampus -7.2333 0.6997 38.9440 -10.338 1.01e-12 ***
StrainC57BL/6J -4.5833 0.7532 76.6401 -6.085 4.28e-08 ***
Age15:Brain_regionHippocampus 3.4833 0.9895 38.9440 3.520 0.001116 **
Age3:Brain_regionHippocampus 0.5000 0.9895 38.9440 0.505 0.616199
Age6:Brain_regionHippocampus 1.0803 1.0173 40.7899 1.062 0.294488
Age15:StrainC57BL/6J 2.8667 1.0652 76.6401 2.691 0.008735 **
Age3:StrainC57BL/6J 0.1500 1.0652 76.6401 0.141 0.888379
Age6:StrainC57BL/6J 2.1000 1.0652 76.6401 1.972 0.052274 .
Brain_regionHippocampus:StrainC57BL/6J 2.0667 0.9895 38.9440 2.089 0.043334 *
Age15:Brain_regionHippocampus:StrainC57BL/6J -2.2167 1.3994 38.9440 -1.584 0.121277
Age3:Brain_regionHippocampus:StrainC57BL/6J -2.0667 1.3994 38.9440 -1.477 0.147762
Age6:Brain_regionHippocampus:StrainC57BL/6J -2.1964 1.4386 40.7899 -1.527 0.134545
---
Signif. codes: 0 ‘***’ 0.001 ‘**’ 0.01 ‘*’ 0.05 ‘.’ 0.1 ‘ ’ 1
$`lsmeans of Strain | Age, Brain_region`
Age = 12, Brain_region = Cortex:
Strain lsmean SE df lower.CL upper.CL
3xTg-AD 17.20 0.533 76.6 16.139 18.26
C57BL/6J 12.62 0.533 76.6 11.556 13.68
Age = 15, Brain_region = Cortex:
Strain lsmean SE df lower.CL upper.CL
3xTg-AD 14.43 0.533 76.6 13.373 15.49
C57BL/6J 12.72 0.533 76.6 11.656 13.78
Age = 3, Brain_region = Cortex:
Strain lsmean SE df lower.CL upper.CL
3xTg-AD 12.45 0.533 76.6 11.389 13.51
C57BL/6J 8.02 0.533 76.6 6.956 9.08
Age = 6, Brain_region = Cortex:
Strain lsmean SE df lower.CL upper.CL
3xTg-AD 14.08 0.533 76.6 13.023 15.14
C57BL/6J 11.60 0.533 76.6 10.539 12.66
Age = 12, Brain_region = Hippocampus:
Strain lsmean SE df lower.CL upper.CL
3xTg-AD 9.97 0.533 76.6 8.906 11.03
C57BL/6J 7.45 0.533 76.6 6.389 8.51
Age = 15, Brain_region = Hippocampus:
Strain lsmean SE df lower.CL upper.CL
3xTg-AD 10.68 0.533 76.6 9.623 11.74
C57BL/6J 8.82 0.533 76.6 7.756 9.88
Age = 3, Brain_region = Hippocampus:
Strain lsmean SE df lower.CL upper.CL
3xTg-AD 5.72 0.533 76.6 4.656 6.78
C57BL/6J 1.28 0.533 76.6 0.223 2.34
Age = 6, Brain_region = Hippocampus:
Strain lsmean SE df lower.CL upper.CL
3xTg-AD 7.93 0.585 77.4 6.766 9.10
C57BL/6J 5.32 0.585 77.4 4.153 6.48
Degrees-of-freedom method: kenward-roger
Confidence level used: 0.95
$`pairwise differences of Strain | Age, Brain_region`
Age = 12, Brain_region = Cortex:
contrast estimate SE df t.ratio p.value
3xTg-AD - C57BL/6J 4.58 0.753 76.6 6.085 <.0001							****
Age = 15, Brain_region = Cortex:
contrast estimate SE df t.ratio p.value
3xTg-AD - C57BL/6J 1.72 0.753 76.6 2.279 0.0254							*
Age = 3, Brain_region = Cortex:
contrast estimate SE df t.ratio p.value
3xTg-AD - C57BL/6J 4.43 0.753 76.6 5.886 <.0001							****
Age = 6, Brain_region = Cortex:
contrast estimate SE df t.ratio p.value
3xTg-AD - C57BL/6J 2.48 0.753 76.6 3.297 0.0015							**
Age = 12, Brain_region = Hippocampus:
contrast estimate SE df t.ratio p.value
3xTg-AD - C57BL/6J 2.52 0.753 76.6 3.341 0.0013							**
Age = 15, Brain_region = Hippocampus:
contrast estimate SE df t.ratio p.value
3xTg-AD - C57BL/6J 1.87 0.753 76.6 2.478 0.0154							*
Age = 3, Brain_region = Hippocampus:
contrast estimate SE df t.ratio p.value
3xTg-AD - C57BL/6J 4.43 0.753 76.6 5.886 <.0001							****
Age = 6, Brain_region = Hippocampus:
contrast estimate SE df t.ratio p.value
3xTg-AD - C57BL/6J 2.61 0.827 77.4 3.159 0.0023							**
Degrees-of-freedom method: kenward-roger

## Sheet: Fig_2_Delta_Age
Linear mixed model fit by REML. t-tests use Satterthwaite's method ['lmerModLmerTest']
Formula: Difference ~ Age * Brain_region * Strain + (1 | id)
Data: Delta age
REML criterion at convergence: 290.4
Scaled residuals:
Min 1Q Median 3Q Max
-1.86083 -0.53369 -0.05227 0.60075 1.99740
Random effects:
Groups Name Variance Std.Dev.
id (Intercept) 0.2331 0.4829
Residual 1.4687 1.2119
Number of obs: 94, groups: id, 48
Fixed effects:
Estimate Std. Error df t value Pr(>|t|)
(Intercept) 5.2000 0.5326 76.6401 9.764 4.28e-15 ***
Age15 -5.7667 0.7532 76.6401 -7.656 4.77e-11 ***
Age3 4.2500 0.7532 76.6401 5.643 2.69e-07 ***
Age6 2.8833 0.7532 76.6401 3.828 0.000262 ***
Brain_regionHippocampus -7.2333 0.6997 38.9440 -10.338 1.01e-12 ***
StrainC57BL/6J -4.5833 0.7532 76.6401 -6.085 4.28e-08 ***
Age15:Brain_regionHippocampus 3.4833 0.9895 38.9440 3.520 0.001116 **
Age3:Brain_regionHippocampus 0.5000 0.9895 38.9440 0.505 0.616199
Age6:Brain_regionHippocampus 1.0803 1.0173 40.7899 1.062 0.294488
Age15:StrainC57BL/6J 2.8667 1.0652 76.6401 2.691 0.008735 **
Age3:StrainC57BL/6J 0.1500 1.0652 76.6401 0.141 0.888379
Age6:StrainC57BL/6J 2.1000 1.0652 76.6401 1.972 0.052274 .
Brain_regionHippocampus:StrainC57BL/6J 2.0667 0.9895 38.9440 2.089 0.043334 *
Age15:Brain_regionHippocampus:StrainC57BL/6J -2.2167 1.3994 38.9440 -1.584 0.121277
Age3:Brain_regionHippocampus:StrainC57BL/6J -2.0667 1.3994 38.9440 -1.477 0.147762
Age6:Brain_regionHippocampus:StrainC57BL/6J -2.1964 1.4386 40.7899 -1.527 0.134545
---
Signif. codes: 0 ‘***’ 0.001 ‘**’ 0.01 ‘*’ 0.05 ‘.’ 0.1 ‘ ’ 1
$`lsmeans of Strain | Brain_region, Age`
Brain_region = Cortex, Age = 12:
Strain lsmean SE df lower.CL upper.CL
3xTg-AD 5.200 0.533 76.6 4.139 6.261
C57BL/6J 0.617 0.533 76.6 -0.444 1.677
Brain_region = Hippocampus, Age = 12:
Strain lsmean SE df lower.CL upper.CL
3xTg-AD -2.033 0.533 76.6 -3.094 -0.973
C57BL/6J -4.550 0.533 76.6 -5.611 -3.489
Brain_region = Cortex, Age = 15:
Strain lsmean SE df lower.CL upper.CL
3xTg-AD -0.567 0.533 76.6 -1.627 0.494
C57BL/6J -2.283 0.533 76.6 -3.344 -1.223
Brain_region = Hippocampus, Age = 15:
Strain lsmean SE df lower.CL upper.CL
3xTg-AD -4.317 0.533 76.6 -5.377 -3.256
C57BL/6J -6.183 0.533 76.6 -7.244 -5.123
Brain_region = Cortex, Age = 3:
Strain lsmean SE df lower.CL upper.CL
3xTg-AD 9.450 0.533 76.6 8.389 10.511
C57BL/6J 5.017 0.533 76.6 3.956 6.077
Brain_region = Hippocampus, Age = 3:
Strain lsmean SE df lower.CL upper.CL
3xTg-AD 2.717 0.533 76.6 1.656 3.777
C57BL/6J -1.717 0.533 76.6 -2.777 -0.656
Brain_region = Cortex, Age = 6:
Strain lsmean SE df lower.CL upper.CL
3xTg-AD 8.083 0.533 76.6 7.023 9.144
C57BL/6J 5.600 0.533 76.6 4.539 6.661
Brain_region = Hippocampus, Age = 6:
Strain lsmean SE df lower.CL upper.CL
3xTg-AD 1.930 0.585 77.4 0.766 3.095
C57BL/6J -0.683 0.585 77.4 -1.847 0.482
Degrees-of-freedom method: kenward-roger
Confidence level used: 0.95
$`pairwise differences of Strain | Brain_region, Age`
Brain_region = Cortex, Age = 12:
contrast estimate SE df t.ratio p.value
3xTg-AD - C57BL/6J 4.58 0.753 76.6 6.085 <.0001							****
Brain_region = Hippocampus, Age = 12:
contrast estimate SE df t.ratio p.value
3xTg-AD - C57BL/6J 2.52 0.753 76.6 3.341 0.0013							**
Brain_region = Cortex, Age = 15:
contrast estimate SE df t.ratio p.value
3xTg-AD - C57BL/6J 1.72 0.753 76.6 2.279 0.0254							*
Brain_region = Hippocampus, Age = 15:
contrast estimate SE df t.ratio p.value
3xTg-AD - C57BL/6J 1.87 0.753 76.6 2.478 0.0154							*
Brain_region = Cortex, Age = 3:
contrast estimate SE df t.ratio p.value
3xTg-AD - C57BL/6J 4.43 0.753 76.6 5.886 <.0001							****
Brain_region = Hippocampus, Age = 3:
contrast estimate SE df t.ratio p.value
3xTg-AD - C57BL/6J 4.43 0.753 76.6 5.886 <.0001							****
Brain_region = Cortex, Age = 6:
contrast estimate SE df t.ratio p.value
3xTg-AD - C57BL/6J 2.48 0.753 76.6 3.297 0.0015							**
Brain_region = Hippocampus, Age = 6:
contrast estimate SE df t.ratio p.value
3xTg-AD - C57BL/6J 2.61 0.827 77.4 3.159 0.0023							**
Degrees-of-freedom method: kenward-roger

## Sheet: Suppl_Fig_1
Supplementary Table 4. Statistical outcomes for linear-mixed effects model.
Linear mixed model fit by REML. t-tests use Satterthwaite's method ['lmerModLmerTest']
Formula: Difference ~ Age * Brain_region * Strain + (1 | id)
Data: Delta age
REML criterion at convergence: 290.4
Scaled residuals:
Min 1Q Median 3Q Max
-1.86083 -0.53369 -0.05227 0.60075 1.99740
Random effects:
Groups Name Variance Std.Dev.
id (Intercept) 0.2331 0.4829
Residual 1.4687 1.2119
Number of obs: 94, groups: id, 48
Fixed effects:
Estimate Std. Error df t value Pr(>|t|)
(Intercept) 5.2000 0.5326 76.6401 9.764 4.28e-15 ***
Age15 -5.7667 0.7532 76.6401 -7.656 4.77e-11 ***
Age3 4.2500 0.7532 76.6401 5.643 2.69e-07 ***
Age6 2.8833 0.7532 76.6401 3.828 0.000262 ***
Brain_regionHippocampus -7.2333 0.6997 38.9440 -10.338 1.01e-12 ***
StrainC57BL/6J -4.5833 0.7532 76.6401 -6.085 4.28e-08 ***
Age15:Brain_regionHippocampus 3.4833 0.9895 38.9440 3.520 0.001116 **
Age3:Brain_regionHippocampus 0.5000 0.9895 38.9440 0.505 0.616199
Age6:Brain_regionHippocampus 1.0803 1.0173 40.7899 1.062 0.294488
Age15:StrainC57BL/6J 2.8667 1.0652 76.6401 2.691 0.008735 **
Age3:StrainC57BL/6J 0.1500 1.0652 76.6401 0.141 0.888379
Age6:StrainC57BL/6J 2.1000 1.0652 76.6401 1.972 0.052274 .
Brain_regionHippocampus:StrainC57BL/6J 2.0667 0.9895 38.9440 2.089 0.043334 *
Age15:Brain_regionHippocampus:StrainC57BL/6J -2.2167 1.3994 38.9440 -1.584 0.121277
Age3:Brain_regionHippocampus:StrainC57BL/6J -2.0667 1.3994 38.9440 -1.477 0.147762
Age6:Brain_regionHippocampus:StrainC57BL/6J -2.1964 1.4386 40.7899 -1.527 0.134545
---
Signif. codes: 0 ‘***’ 0.001 ‘**’ 0.01 ‘*’ 0.05 ‘.’ 0.1 ‘ ’ 1
$`lsmeans of Brain_region | Strain, Age`
Strain = 3xTg-AD, Age = 12:
Brain_region lsmean SE df lower.CL upper.CL
Cortex 5.200 0.533 76.6 4.139 6.261
Hippocampus -2.033 0.533 76.6 -3.094 -0.973
Strain = C57BL/6J, Age = 12:
Brain_region lsmean SE df lower.CL upper.CL
Cortex 0.617 0.533 76.6 -0.444 1.677
Hippocampus -4.550 0.533 76.6 -5.611 -3.489
Strain = 3xTg-AD, Age = 15:
Brain_region lsmean SE df lower.CL upper.CL
Cortex -0.567 0.533 76.6 -1.627 0.494
Hippocampus -4.317 0.533 76.6 -5.377 -3.256
Strain = C57BL/6J, Age = 15:
Brain_region lsmean SE df lower.CL upper.CL
Cortex -2.283 0.533 76.6 -3.344 -1.223
Hippocampus -6.183 0.533 76.6 -7.244 -5.123
Strain = 3xTg-AD, Age = 3:
Brain_region lsmean SE df lower.CL upper.CL
Cortex 9.450 0.533 76.6 8.389 10.511
Hippocampus 2.717 0.533 76.6 1.656 3.777
Strain = C57BL/6J, Age = 3:
Brain_region lsmean SE df lower.CL upper.CL
Cortex 5.017 0.533 76.6 3.956 6.077
Hippocampus -1.717 0.533 76.6 -2.777 -0.656
Strain = 3xTg-AD, Age = 6:
Brain_region lsmean SE df lower.CL upper.CL
Cortex 8.083 0.533 76.6 7.023 9.144
Hippocampus 1.930 0.585 77.4 0.766 3.095
Strain = C57BL/6J, Age = 6:
Brain_region lsmean SE df lower.CL upper.CL
Cortex 5.600 0.533 76.6 4.539 6.661
Hippocampus -0.683 0.585 77.4 -1.847 0.482
Degrees-of-freedom method: kenward-roger
Confidence level used: 0.95
$`pairwise differences of Brain_region | Strain, Age`
Strain = 3xTg-AD, Age = 12:
contrast estimate SE df t.ratio p.value
Cortex - Hippocampus 7.23 0.70 38.4 10.338 <.0001							****
Strain = C57BL/6J, Age = 12:
contrast estimate SE df t.ratio p.value
Cortex - Hippocampus 5.17 0.70 38.4 7.384 <.0001							****
Strain = 3xTg-AD, Age = 15:
contrast estimate SE df t.ratio p.value
Cortex - Hippocampus 3.75 0.70 38.4 5.359 <.0001							****
Strain = C57BL/6J, Age = 15:
contrast estimate SE df t.ratio p.value
Cortex - Hippocampus 3.90 0.70 38.4 5.574 <.0001							****
Strain = 3xTg-AD, Age = 3:
contrast estimate SE df t.ratio p.value
Cortex - Hippocampus 6.73 0.70 38.4 9.623 <.0001							****
Strain = C57BL/6J, Age = 3:
contrast estimate SE df t.ratio p.value
Cortex - Hippocampus 6.73 0.70 38.4 9.623 <.0001							****
Strain = 3xTg-AD, Age = 6:
contrast estimate SE df t.ratio p.value
Cortex - Hippocampus 6.15 0.74 41.9 8.311 <.0001							****
Strain = C57BL/6J, Age = 6:
contrast estimate SE df t.ratio p.value
Cortex - Hippocampus 6.28 0.74 41.9 8.486 <.0001							****
Degrees-of-freedom method: kenward-roger
